# Supplementary material for: Identification of Drivers of Aneuploidy in Breast Tumors
Source: PubMed Central journal article supplement — Cell Rep. Author manuscript; Available in PMC 2018 Jun 12. (PMC5997284; doi:10.1016/j.celrep.2018.04.102), 2018-05-29

Supplemental Figure 1. The primary Alternate Allele Frequency histograms generated from the sequence data from 522 human breast tumors. Each of the following pages contains four histograms generated to portray the heterogeneity of a single breast tumor from the TCGA datasets. All plots have "Alternate Allele Frequency" as the X axis and "Number of SNPs with the specified allele frequency" on the Y axis. The top two plots are generated from the matched normal sequence data and the bottom two plots are from the tumor sequence data. The plots on the left represent all SNPs in the exome sequence data while the plots on the right represent only the SNPs scored as heterozygous in the normal sample. We will use this first page as an example and add labels in red text to direct the viewer. The first number on the title line is the ranking of the tumor out of 522, with 1 being the most aneuploid and 522 the least aneuploid. n=number of SNPs quantified in each plot. Note that the plots of the heterzygous alleles only show allele frequencies between 0.1 and 0.9.

Rank of the tumor (from 1 to 522): This example is ranked number 5

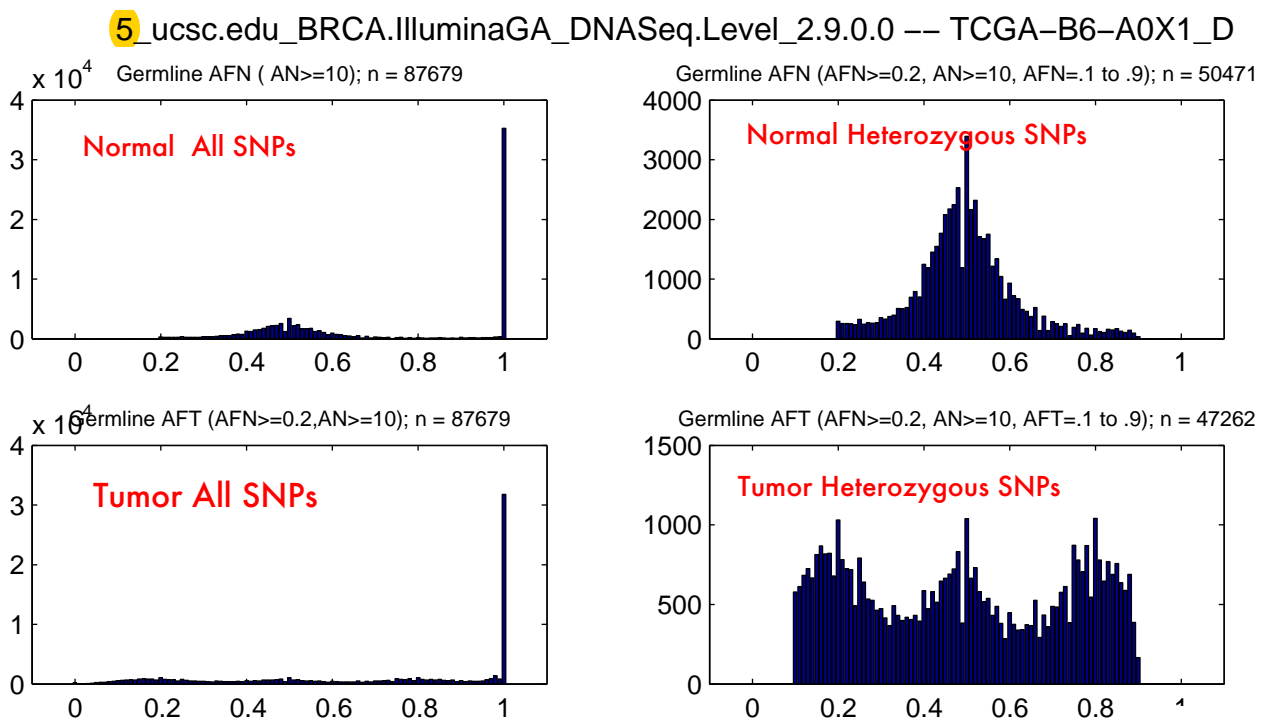

1\_ucsc.edu\_BRCA.IlluminaGA\_DNASeq.Level\_2.14.0.0 -- TCGA-A8-A07R\_W

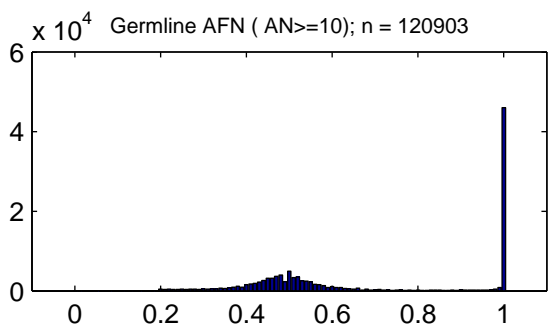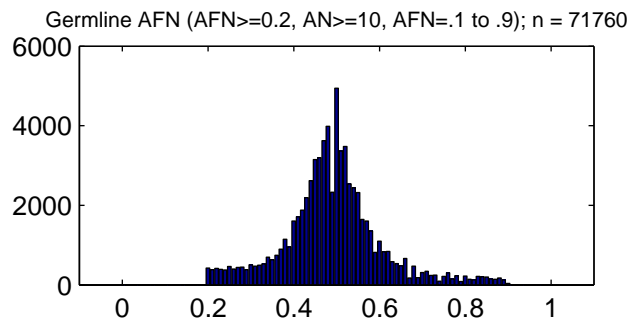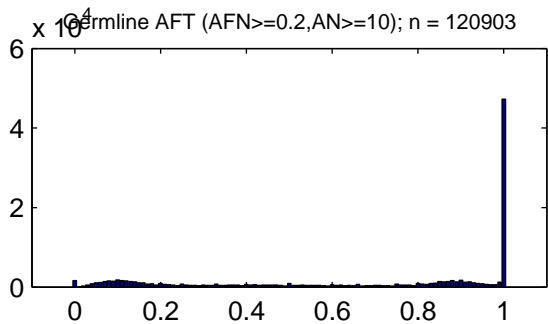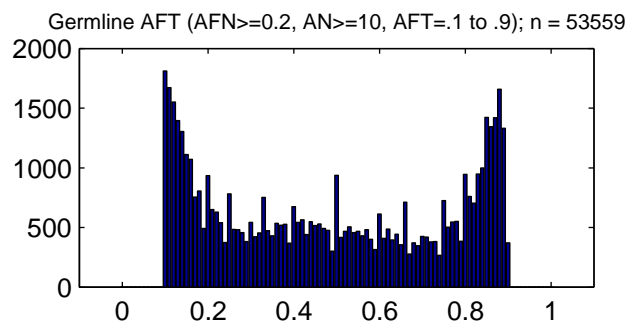

2\_ucsc.edu\_BRCA.IlluminaGA\_DNASeq.Level\_2.14.0.0 -- TCGA-A8-A07C\_W

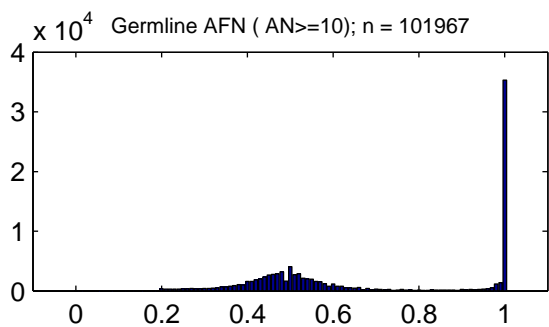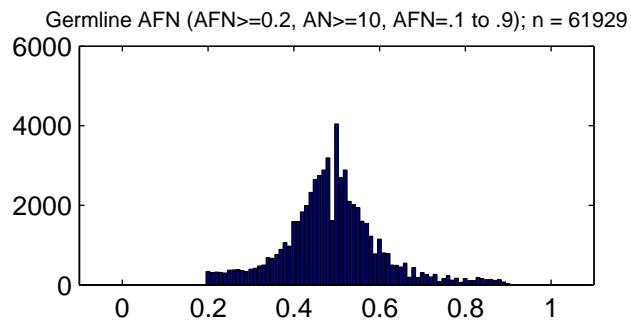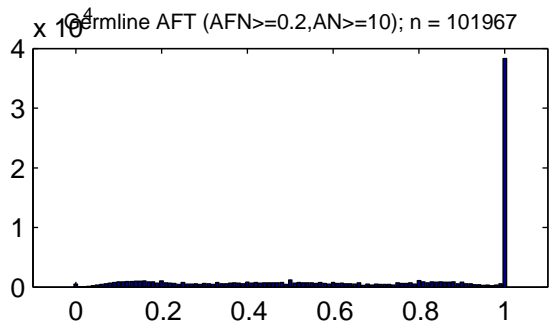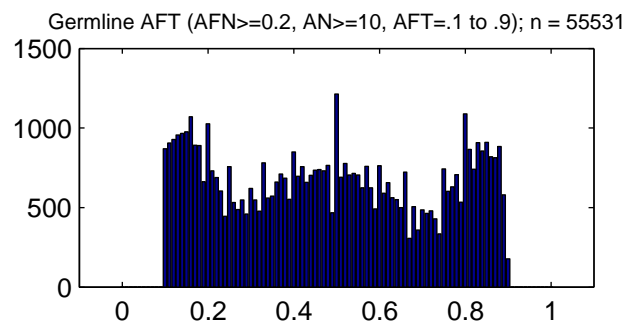

3\_ucsc.edu\_BRCA.IlluminaGA\_DNASeq.Level\_2.6.0.0 -- TCGA-AO-A124\_D

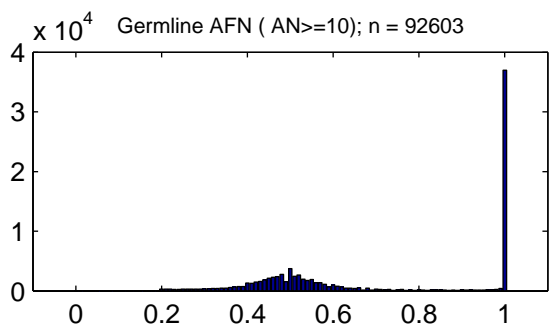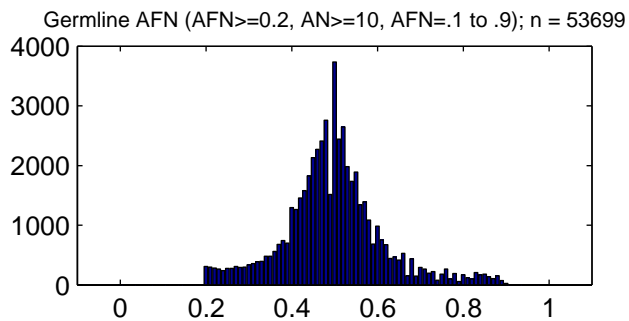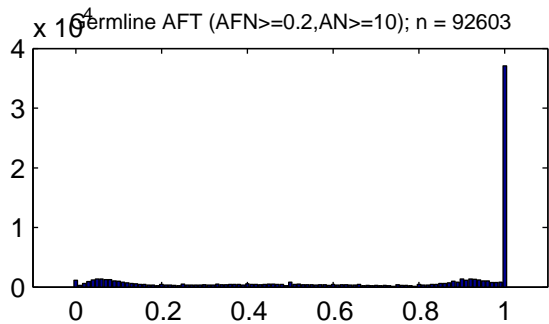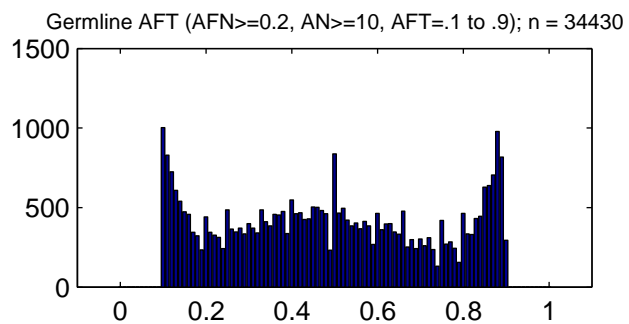

4\_ucsc.edu\_BRCA.IlluminaGA\_DNASeq.Level\_2.1.0.0 -- TCGA-A1-A0SO\_D

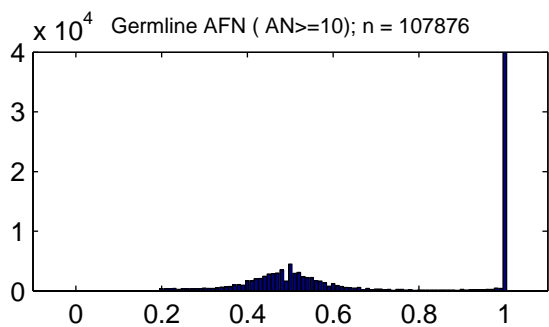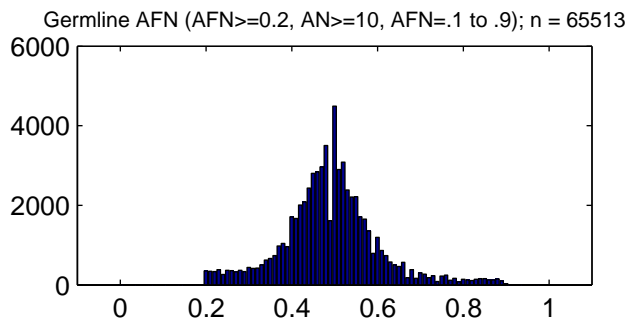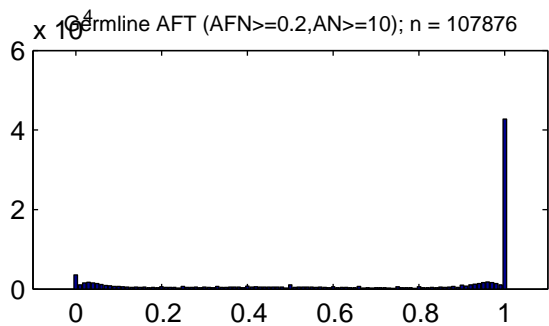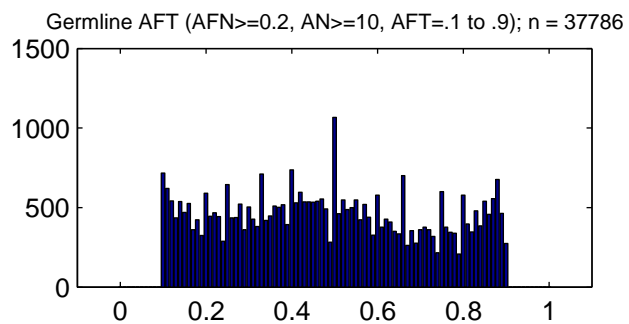

5\_ucsc.edu\_BRCA.IlluminaGA\_DNASeq.Level\_2.9.0.0 -- TCGA-B6-A0X1\_D

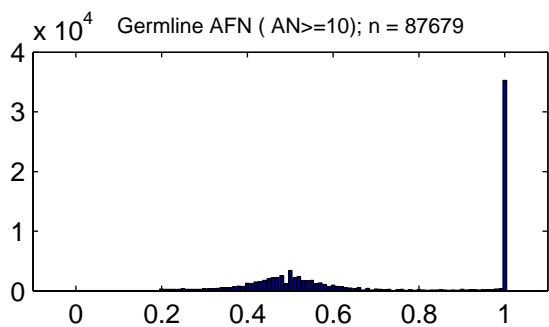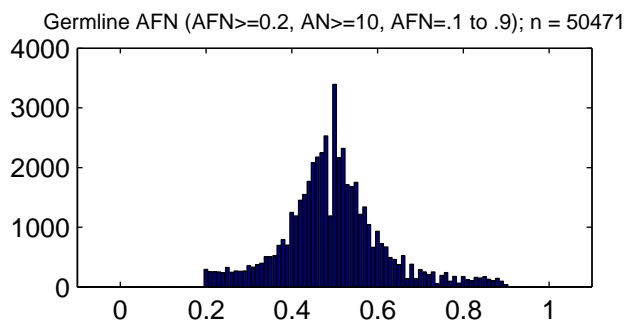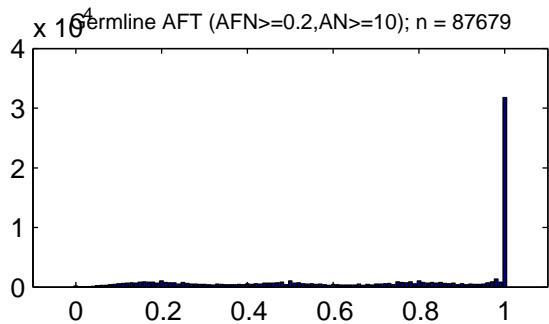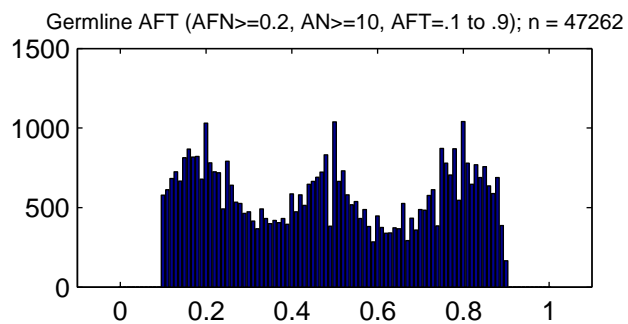

6\_ucsc.edu\_BRCA.IlluminaGA\_DNASeq.Level\_2.3.0.0 -- TCGA-A7-A13D\_D

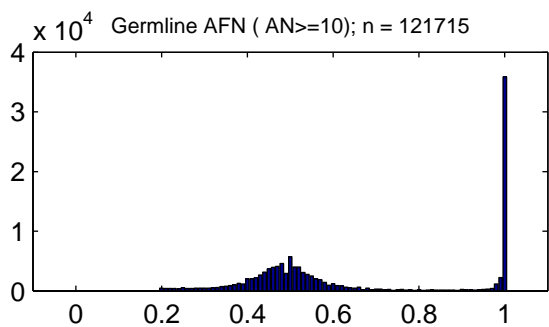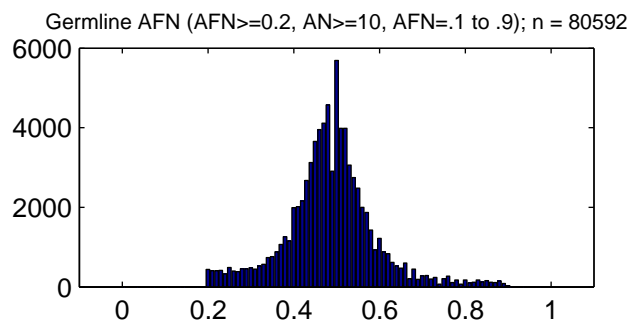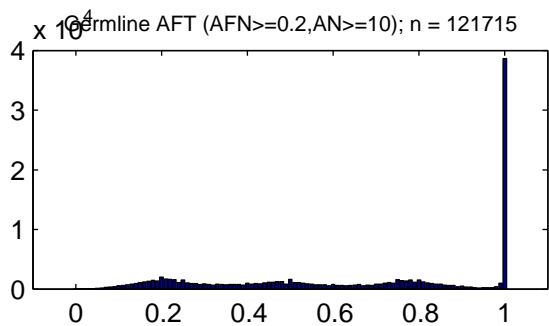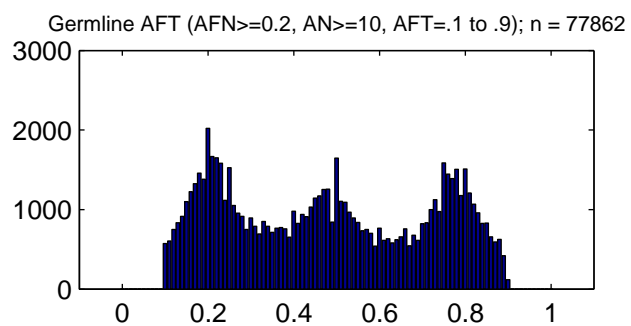

7\_ucsc.edu\_BRCA.IlluminaGA\_DNASeq.Level\_2.2.0.0 -- TCGA-A2-A04U\_D

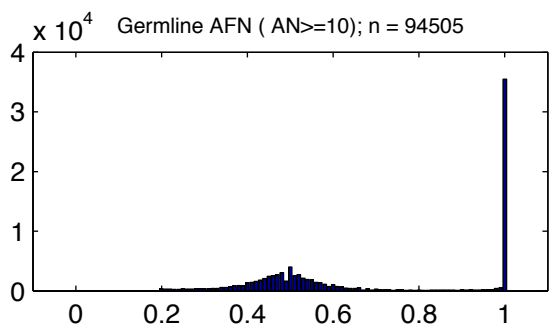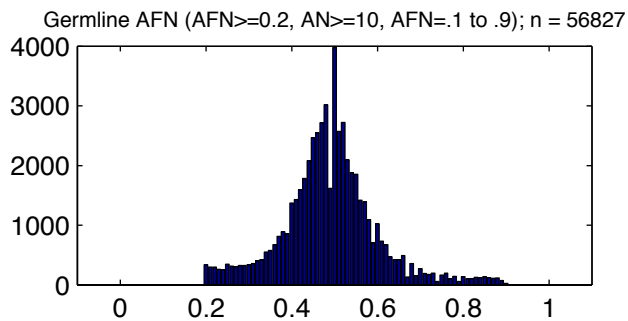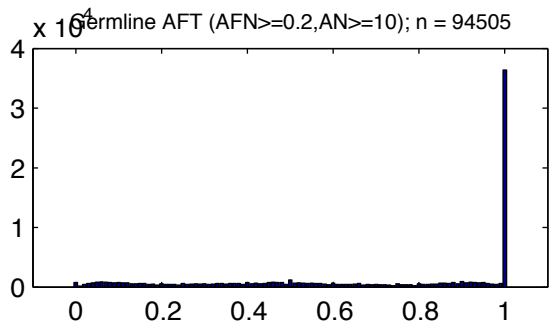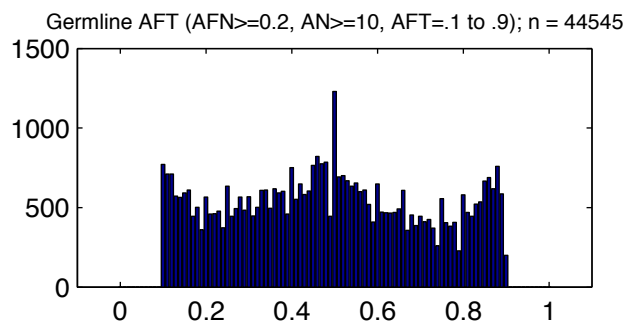



8\_ucsc.edu\_BRCA.IlluminaGA\_DNASeq.Level\_2.14.0.0 -- TCGA-A2-A0T2\_W

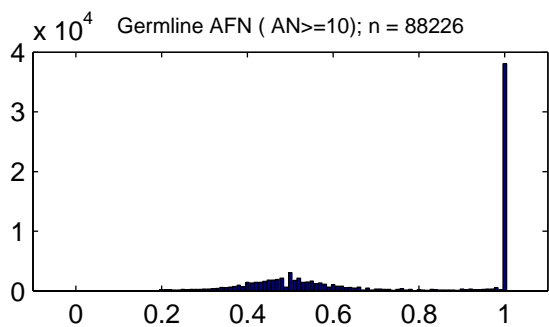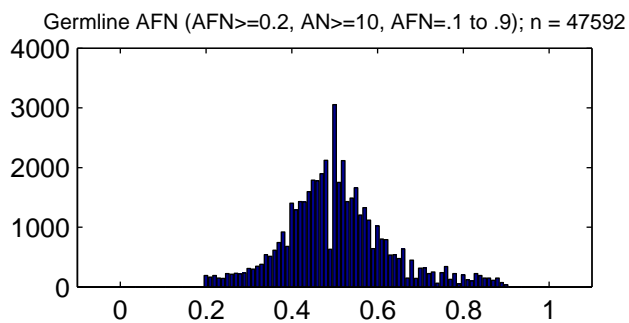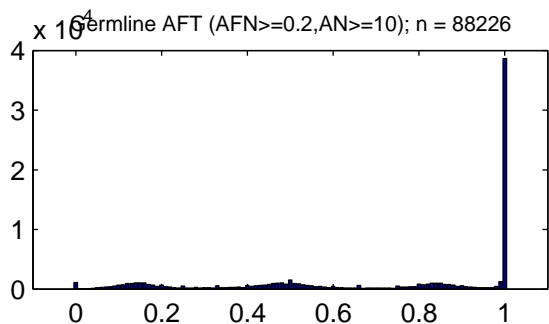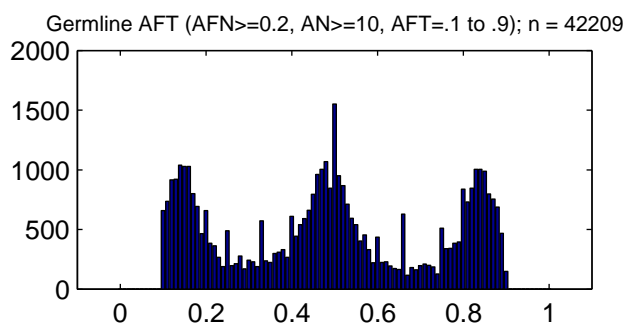

9\_ucsc.edu\_BRCA.IlluminaGA\_DNASeq.Level\_2.10.0.0 -- TCGA-BH-A18T\_D

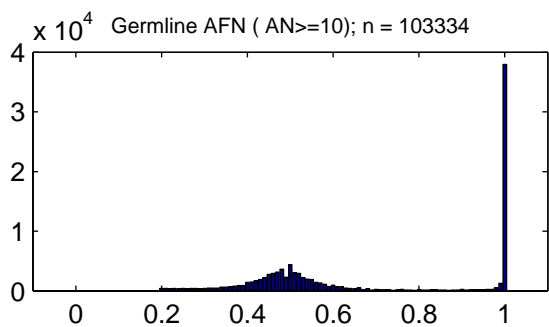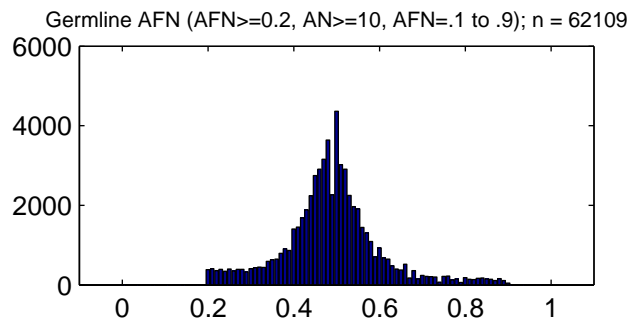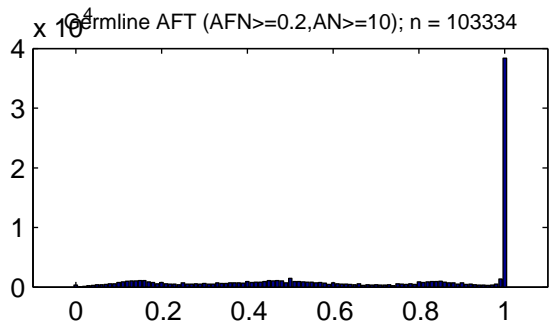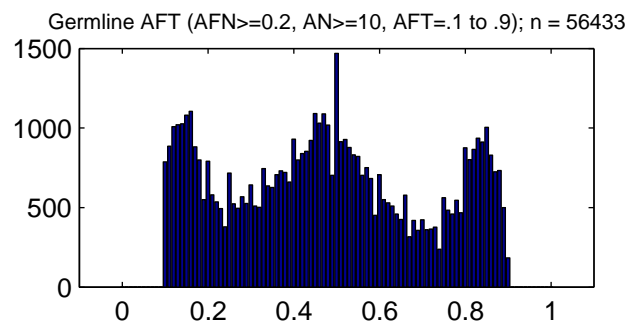

10\_ucsc.edu\_BRCA.IlluminaGA\_DNASeq.Level\_2.2.0.0 -- TCGA-A2-A0YM\_D

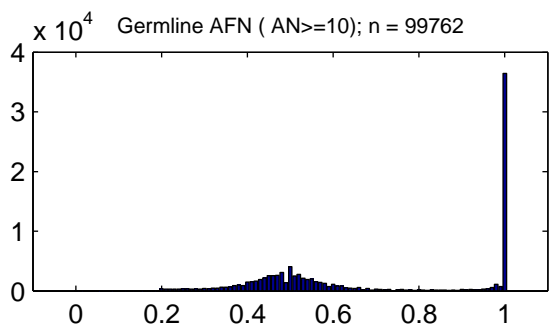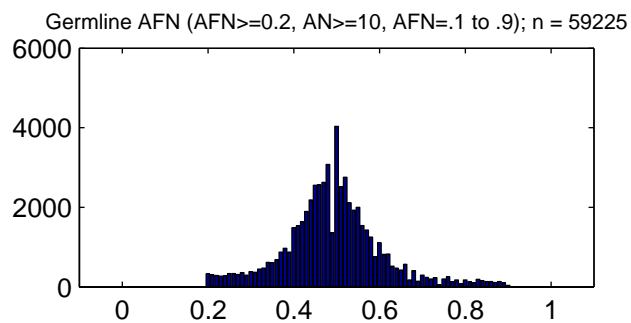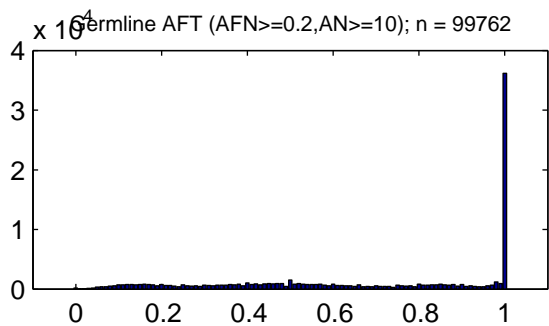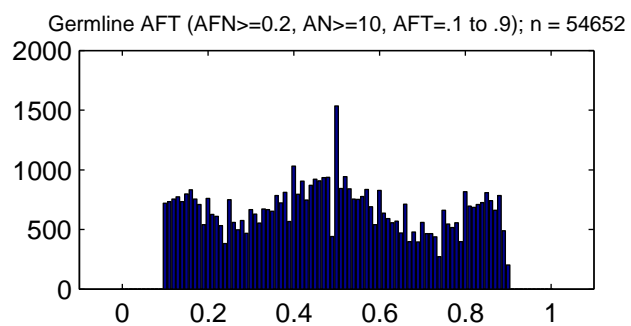

11\_ucsc.edu\_BRCA.IlluminaGA\_DNASeq.Level\_2.13.0.0 -- TCGA-E2-A10B\_D

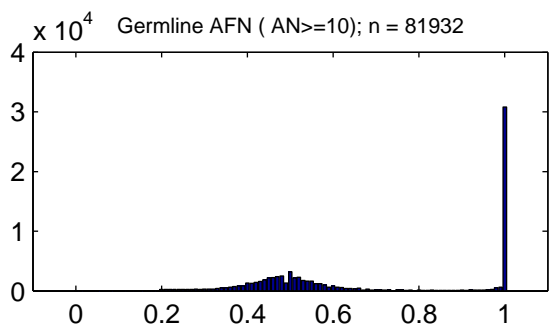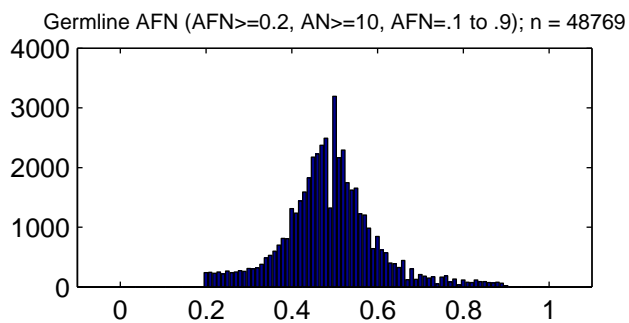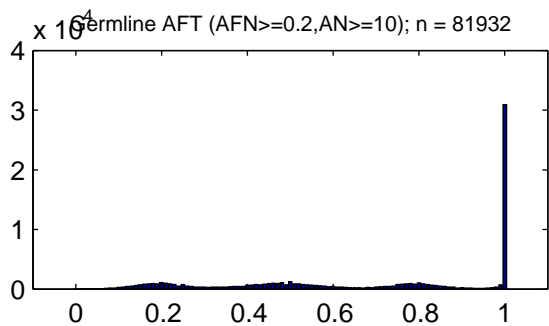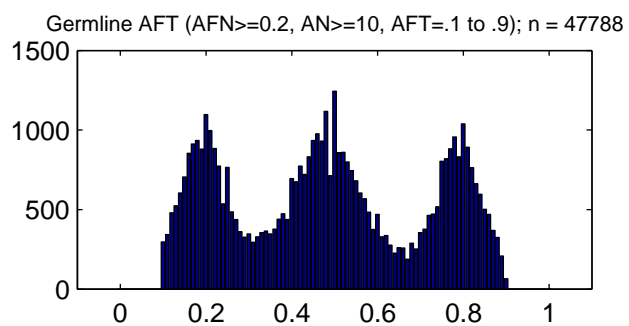

12\_ucsc.edu\_BRCA.IlluminaGA\_DNASeq.Level\_2.2.0.0 -- TCGA-A2-A0YT\_D

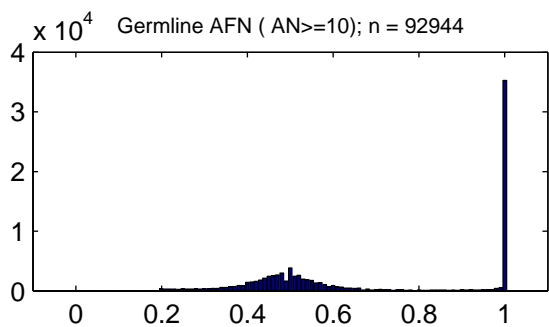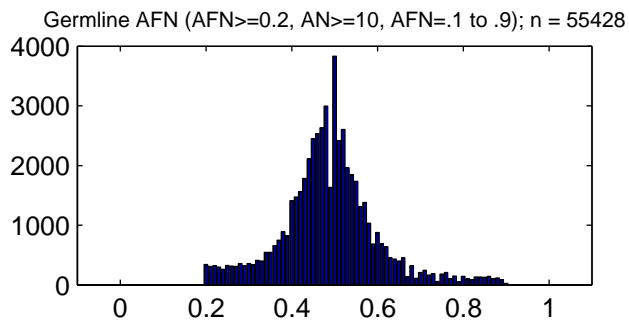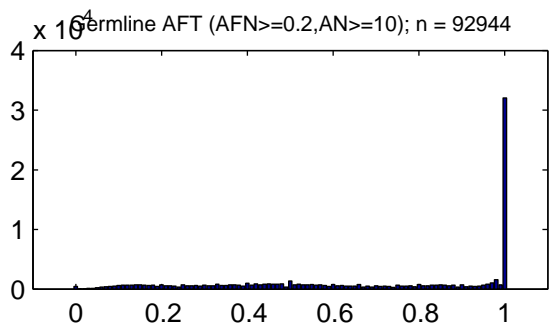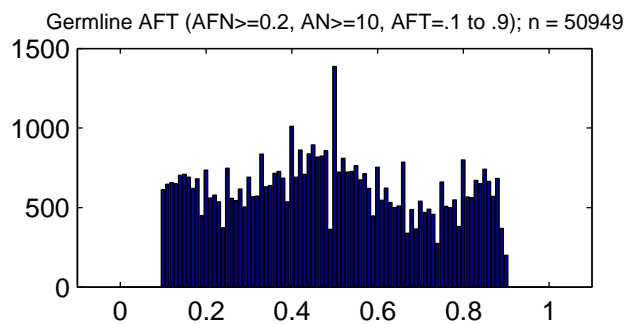

13\_ucsc.edu\_BRCA.IlluminaGA\_DNASeq.Level\_2.14.0.0 -- TCGA-B6-A016\_W

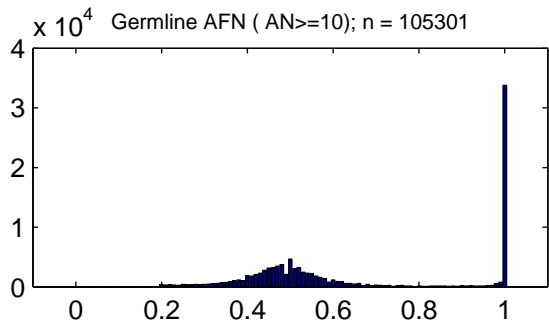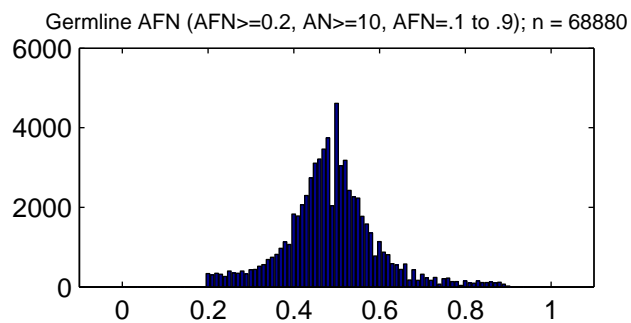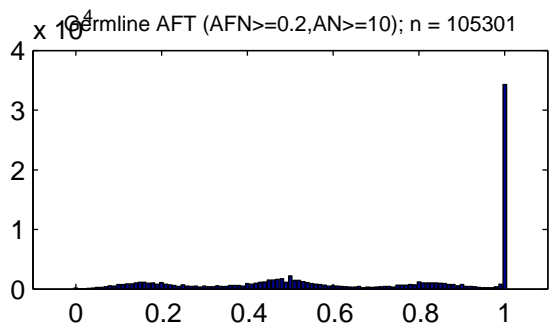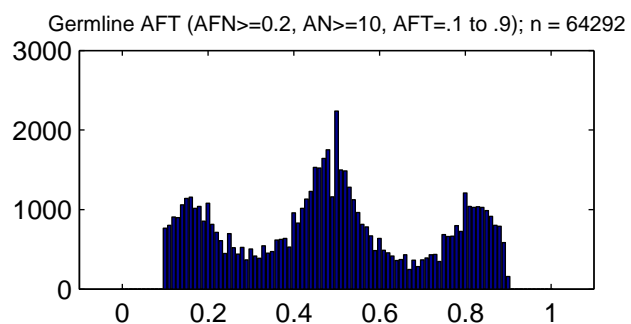

14\_ucsc.edu\_BRCA.IlluminaGA\_DNASeq.Level\_2.13.0.0 --- TCGA-E2-A14R\_D

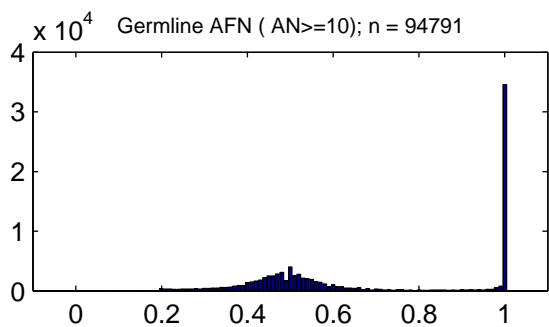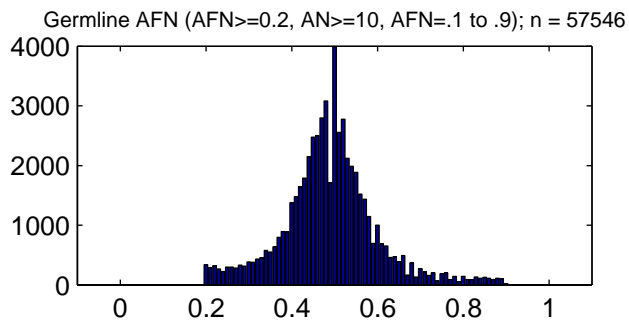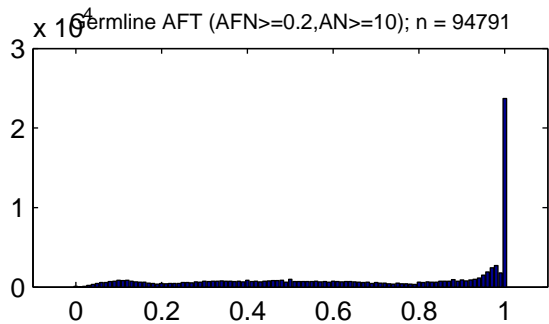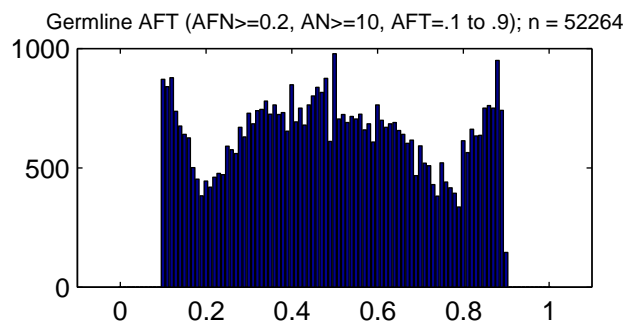

15\_ucsc.edu\_BRCA.IlluminaGA\_DNASeq.Level\_2.10.0.0 -- TCGA-BH-A18V\_D

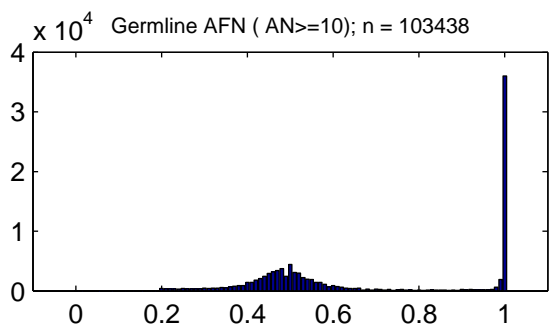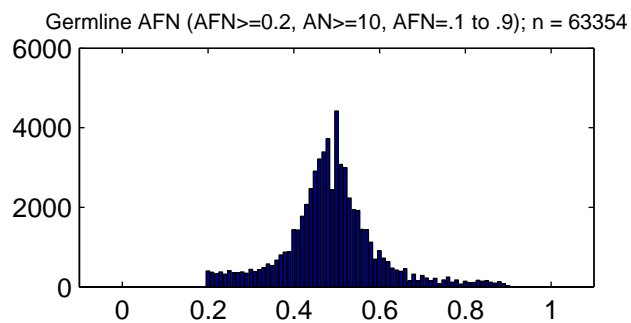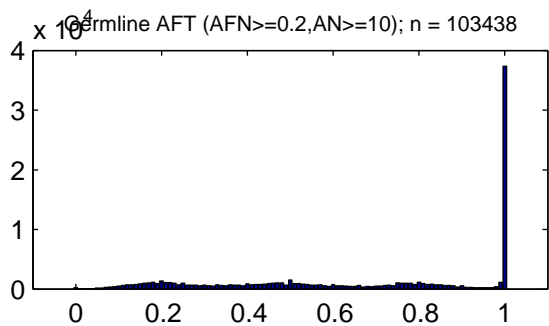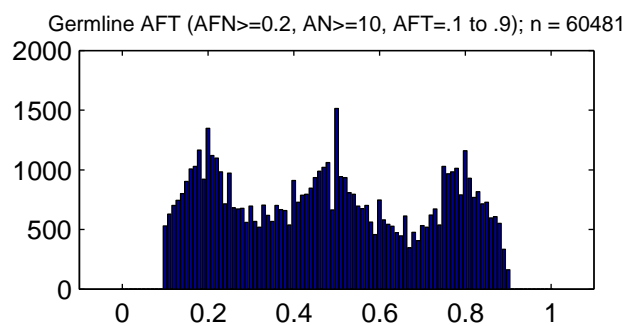



16\_ucsc.edu\_BRCA.IlluminaGA\_DNASeq.Level\_2.4.0.0 -- TCGA-A8-A07Z\_W

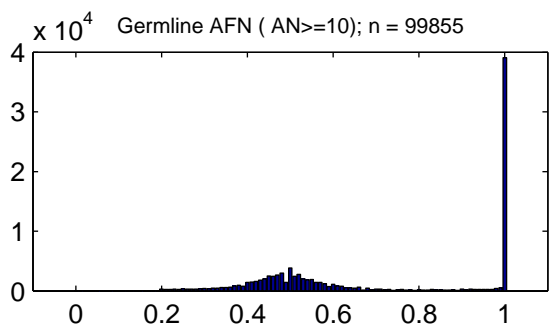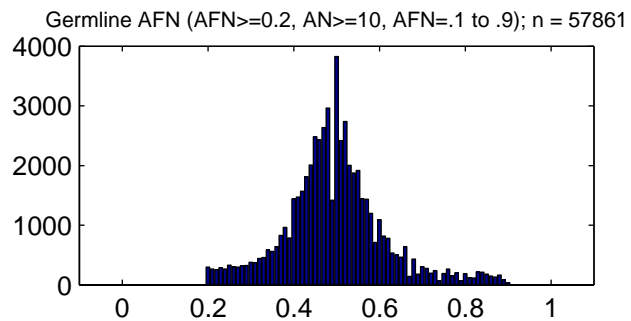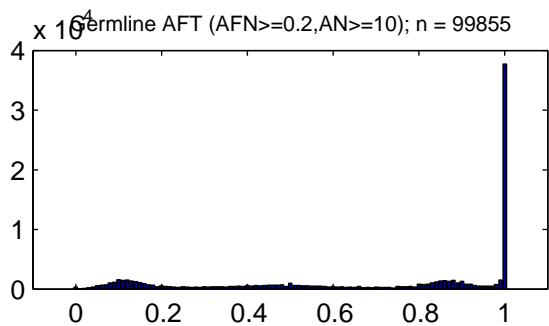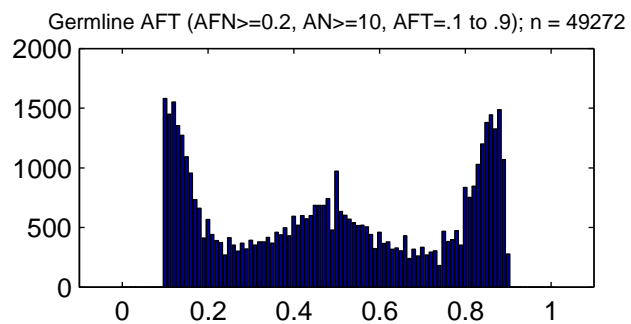

17\_ucsc.edu\_BRCA.IlluminaGA\_DNASeq.Level\_2.12.0.0 -- TCGA-D8-A143\_D

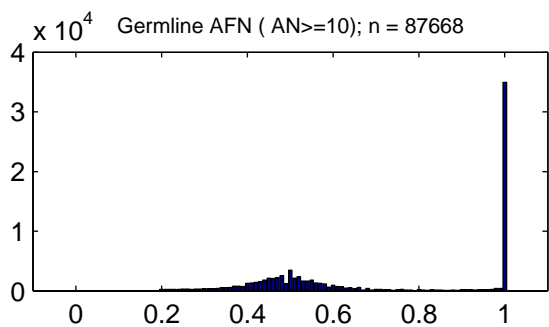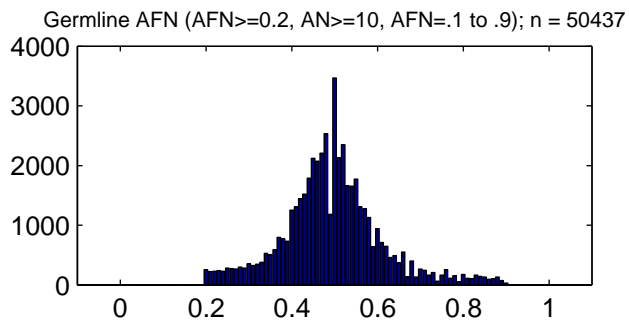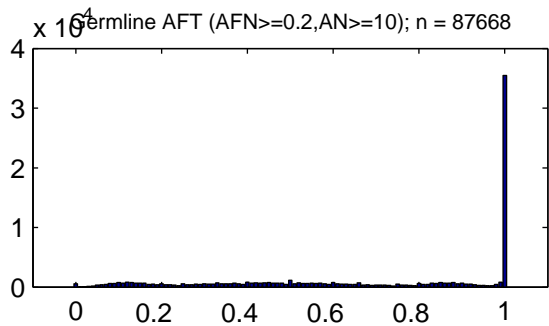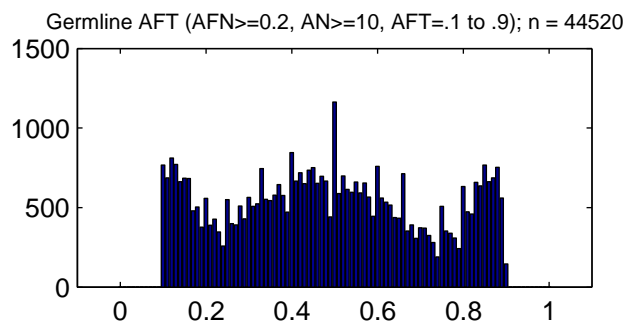

18\_ucsc.edu\_BRCA.IlluminaGA\_DNASeq.Level\_2.5.0.0 -- TCGA-AN-A0XU\_D

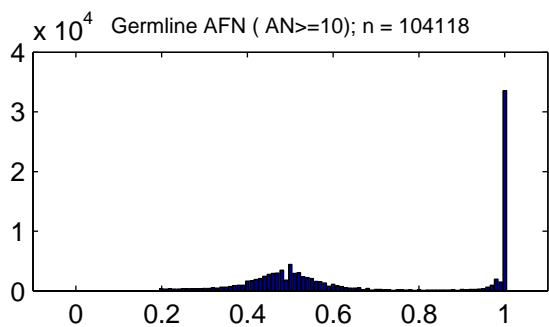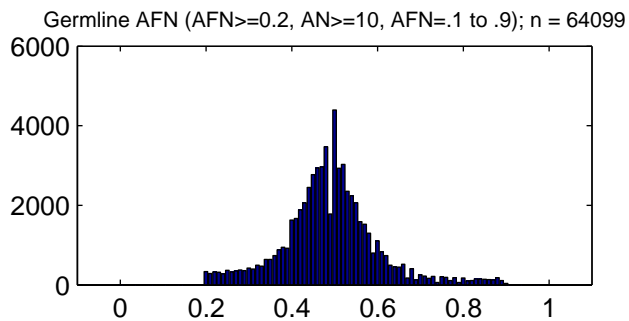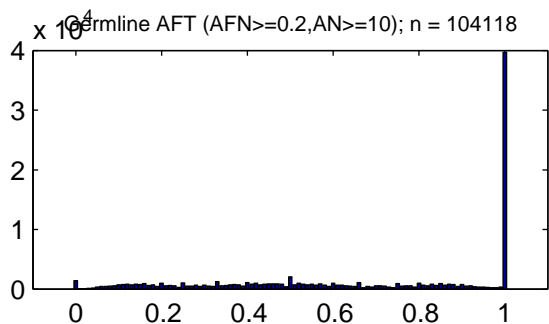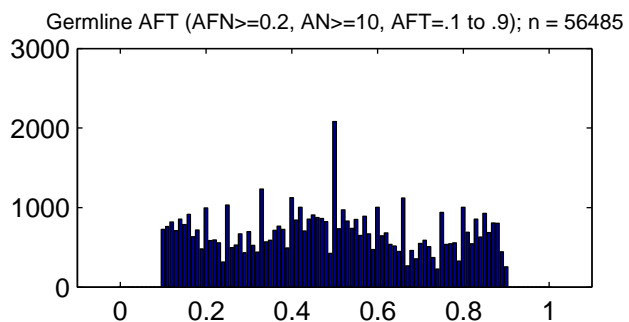

19\_ucsc.edu\_BRCA.IlluminaGA\_DNASeq.Level\_2.10.0.0 -- TCGA-BH-A0WA\_D

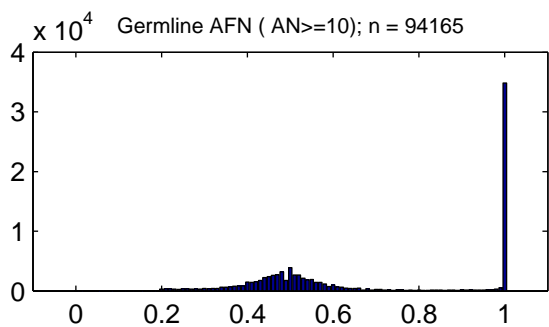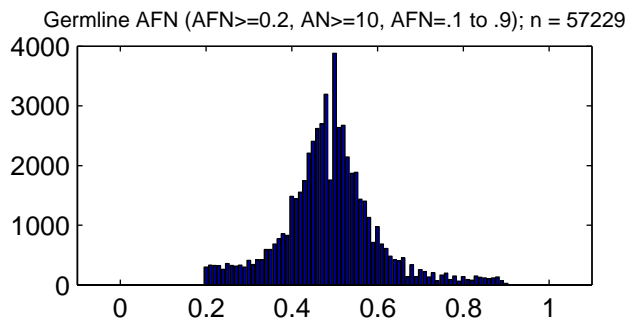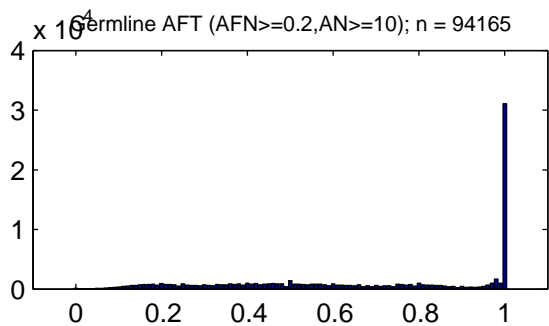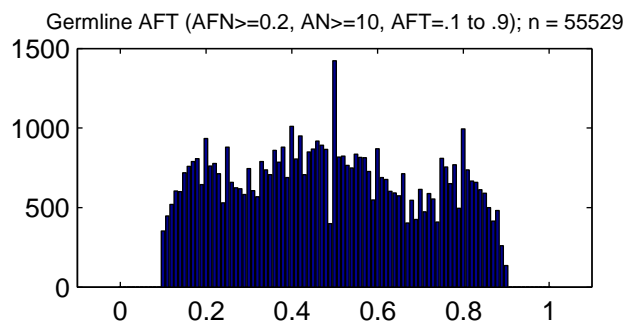

20\_ucsc.edu\_BRCA.IlluminaGA\_DNASeq.Level\_2.2.0.0 -- TCGA-A2-A0D0\_W

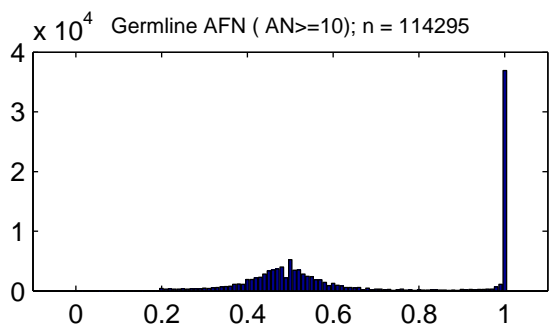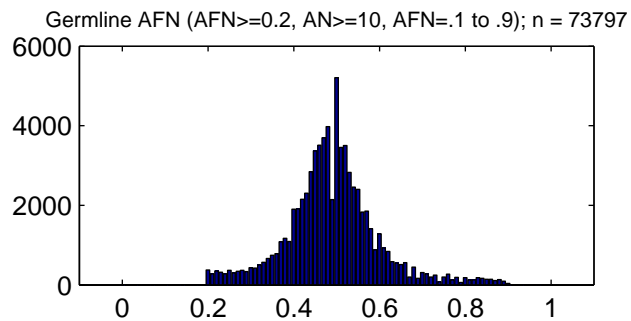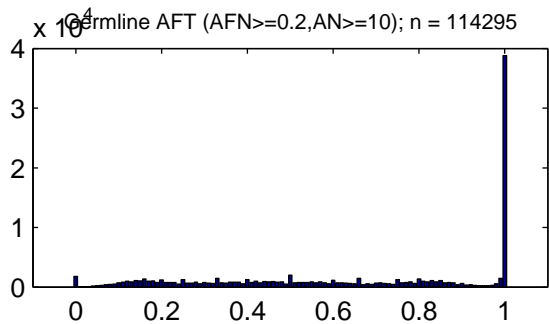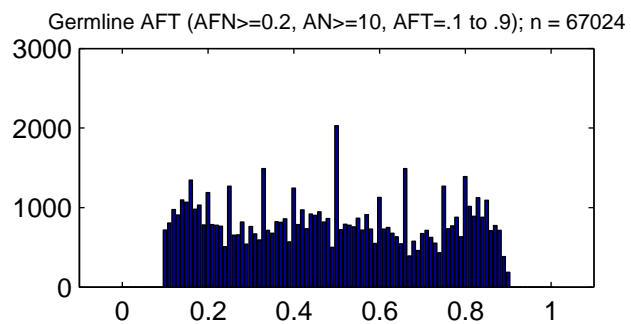

21\_ucsc.edu\_BRCA.IlluminaGA\_DNASeq.Level\_2.6.0.0 -- TCGA-AO-A12F\_D

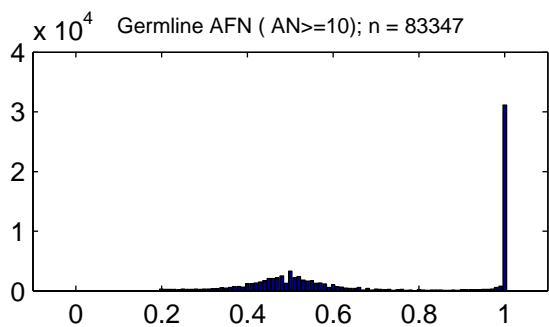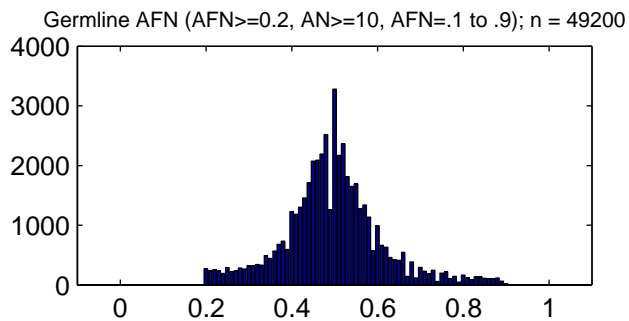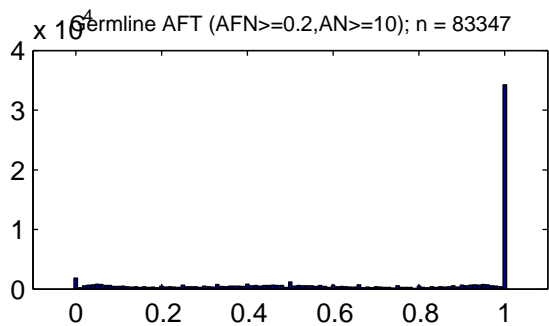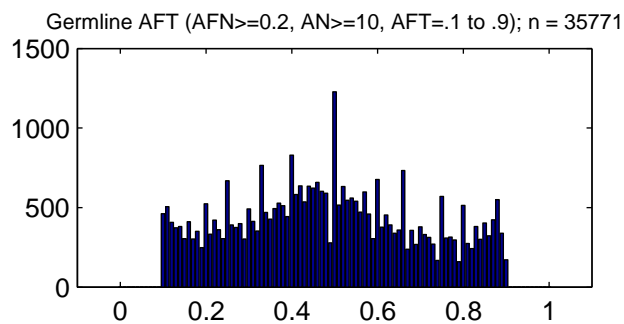

22\_ucsc.edu\_BRCA.IlluminaGA\_DNASeq.Level\_2.8.0.0 -- TCGA-AR-A0TU\_D

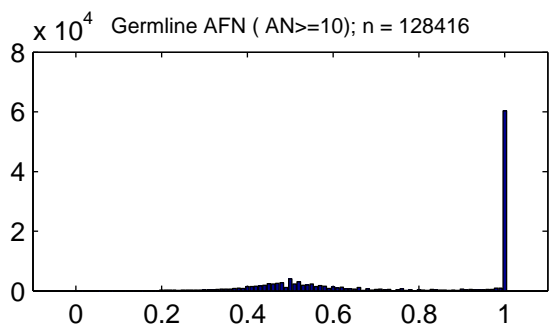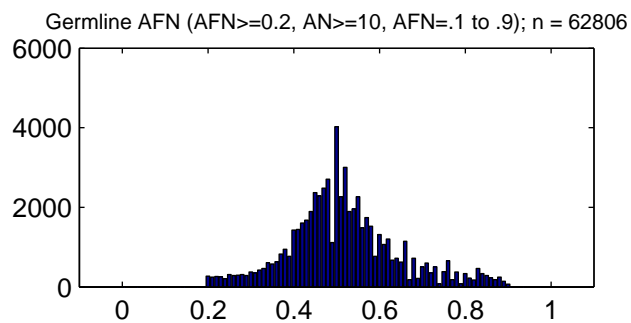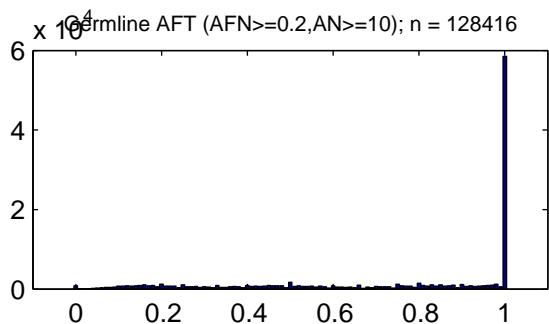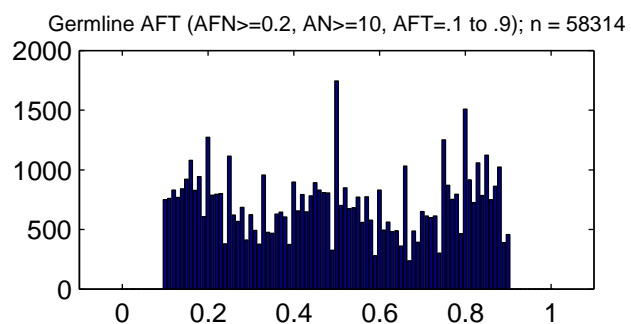

23\_ucsc.edu\_BRCA.IlluminaGA\_DNASeq.Level\_2.9.0.0 -- TCGA-B6-A016\_W

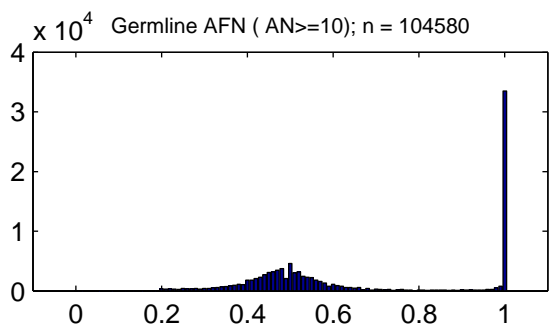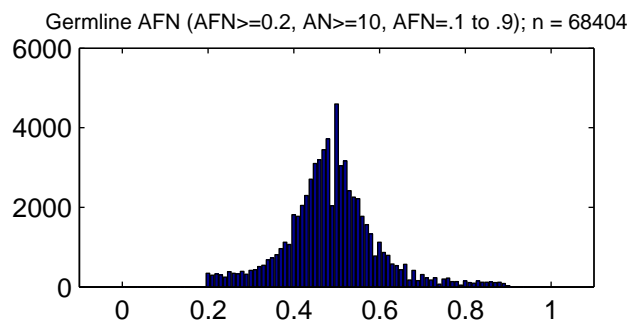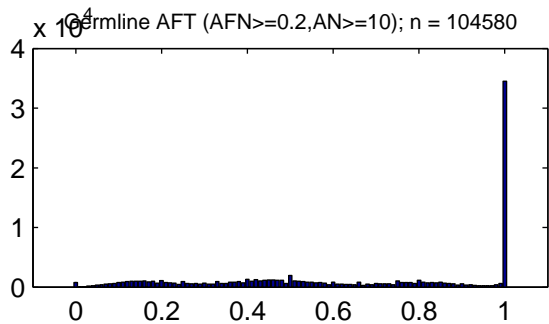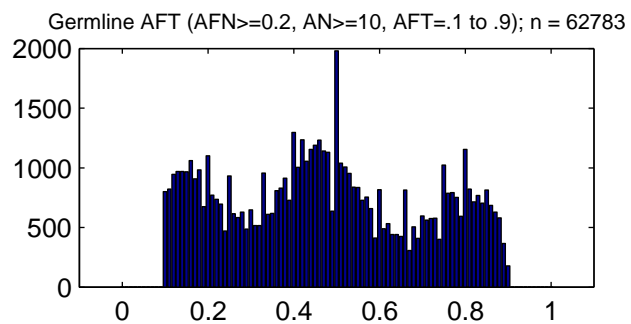



24\_ucsc.edu\_BRCA.IlluminaGA\_DNASeq.Level\_2.8.0.0 -- TCGA-AR-A1AY\_D

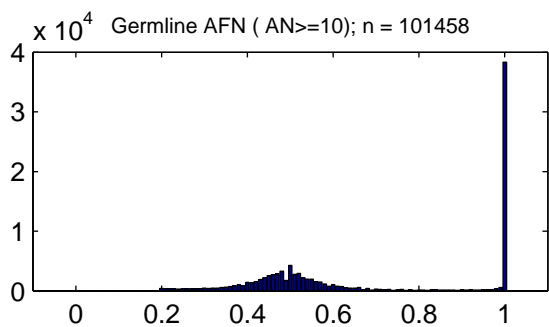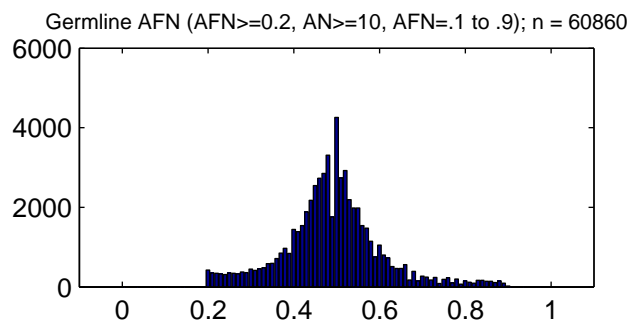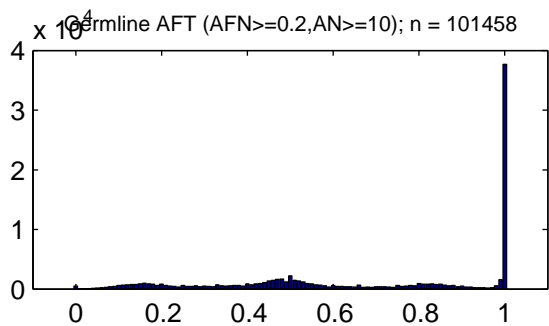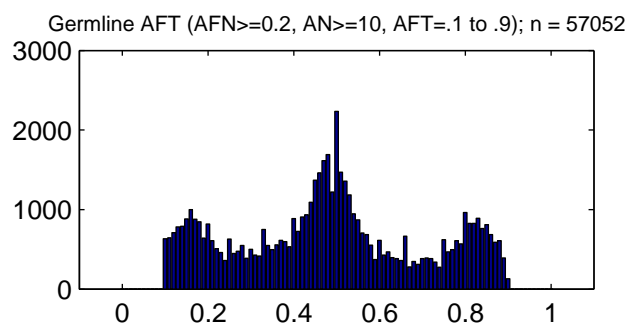

25\_ucsc.edu\_BRCA.IlluminaGA\_DNASeq.Level\_2.14.0.0 -- TCGA-A8-A06R\_W

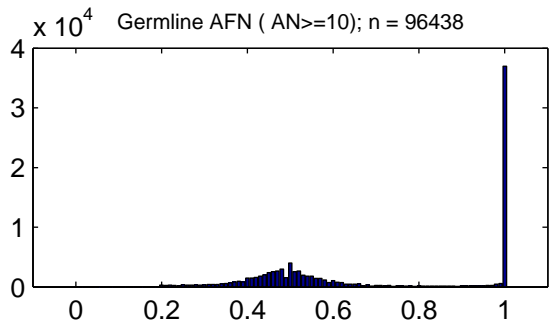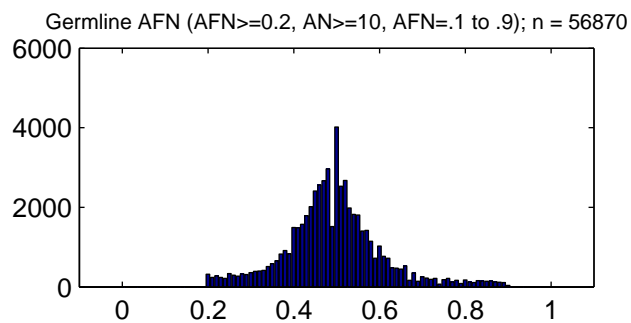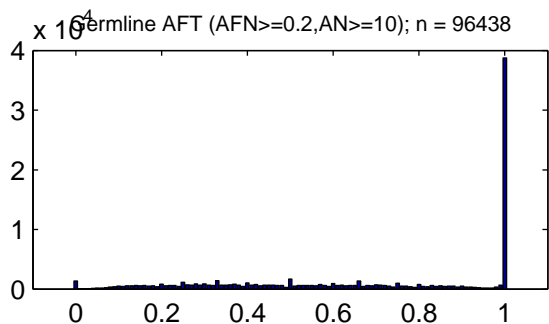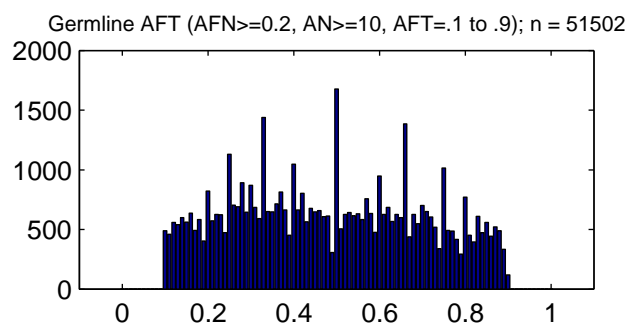

26\_ucsc.edu\_BRCA.IlluminaGA\_DNASeq.Level\_2.11.0.0 -- TCGA-C8-A12L\_D

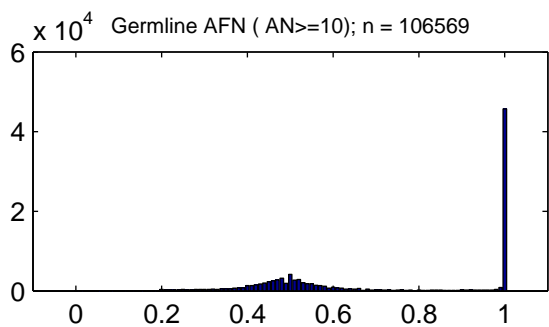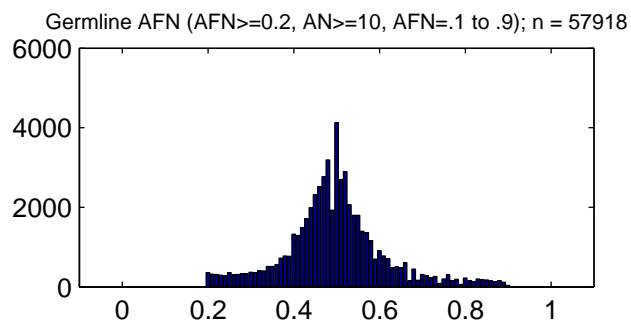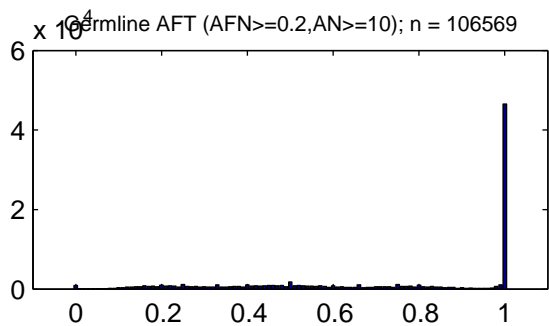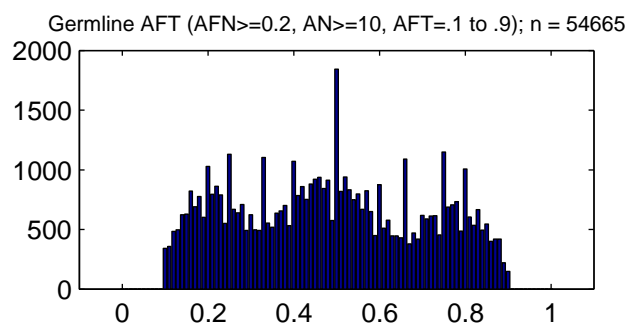

27\_ucsc.edu\_BRCA.IlluminaGA\_DNASeq.Level\_2.12.0.0 -- TCGA-D8-A147\_D

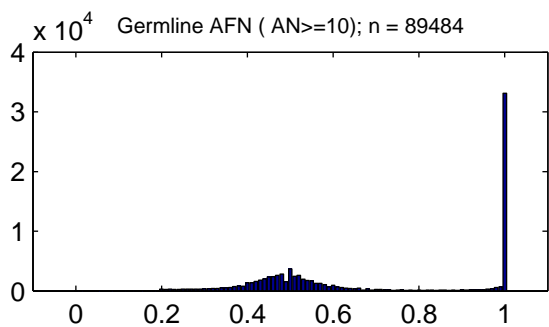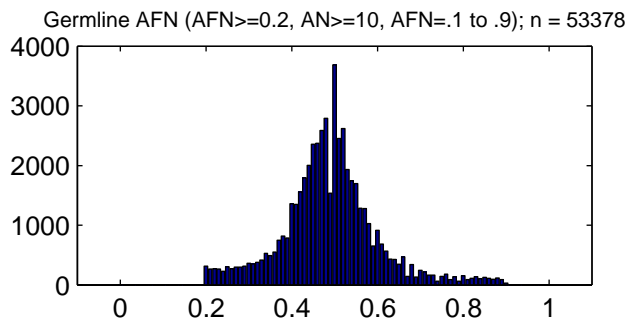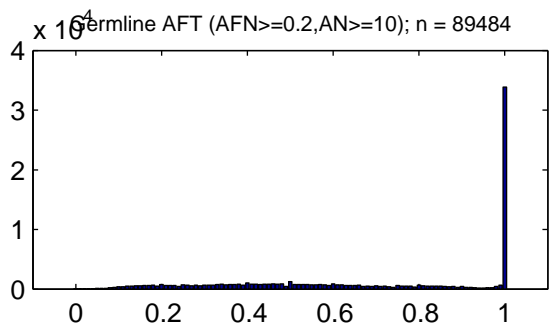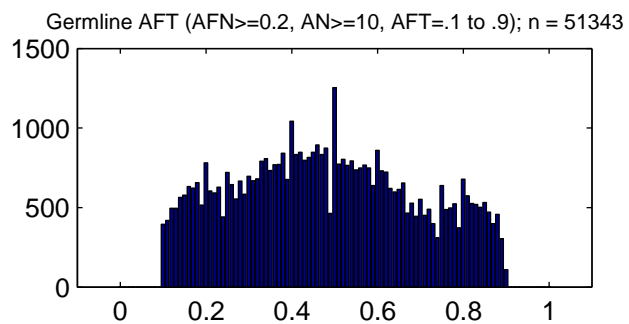

28\_ucsc.edu\_BRCA.IlluminaGA\_DNASeq.Level\_2.5.0.0 -- TCGA-AN-A0FT\_W

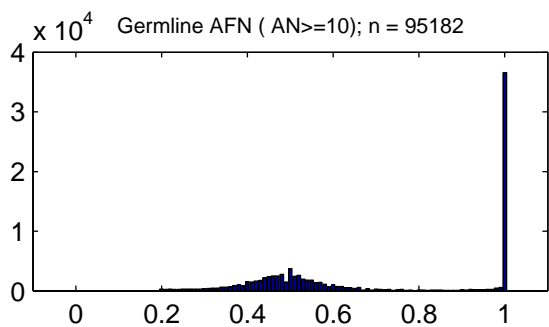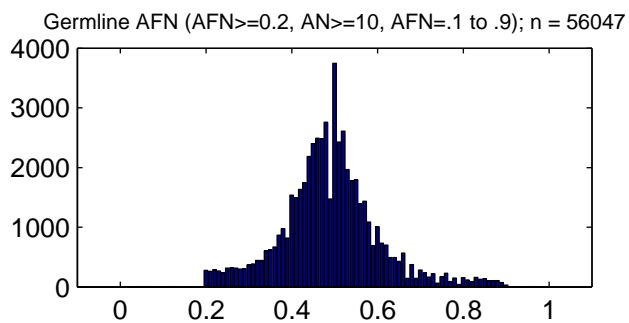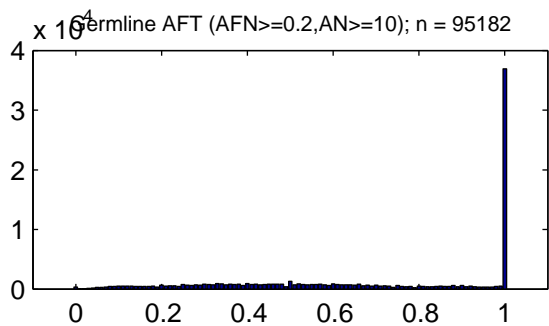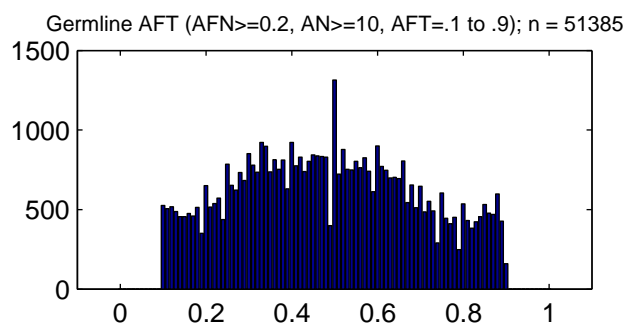

29\_ucsc.edu\_BRCA.IlluminaGA\_DNASeq.Level\_2.10.0.0 -- TCGA-BH-A0E0\_W

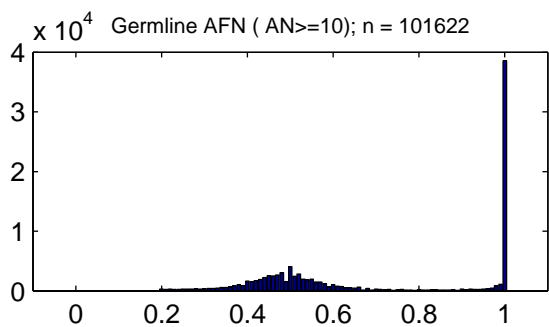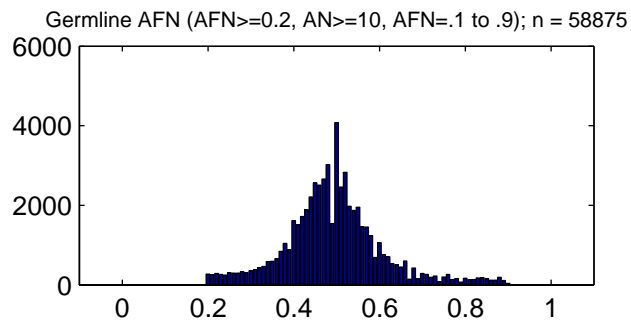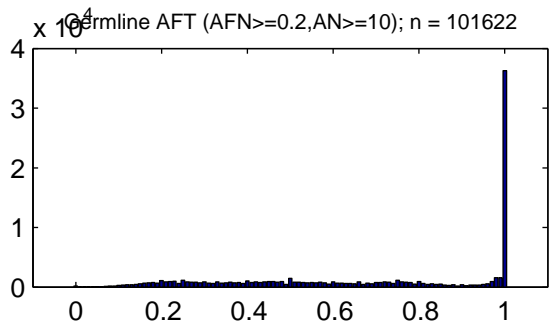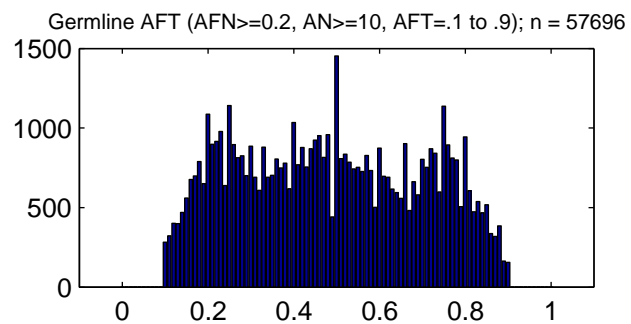

30\_ucsc.edu\_BRCA.IlluminaGA\_DNASeq.Level\_2.5.0.0 -- TCGA-AN-A0G0\_W

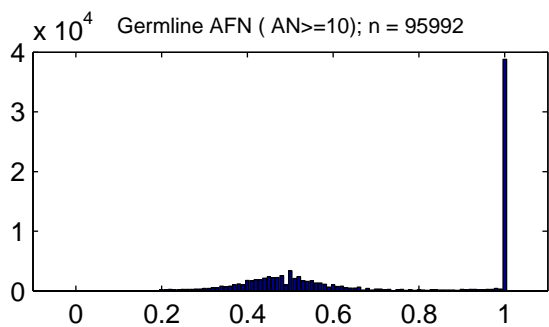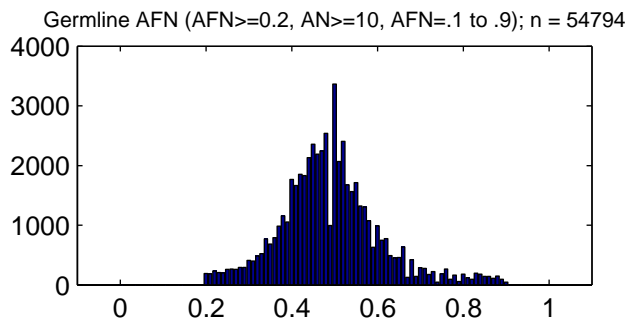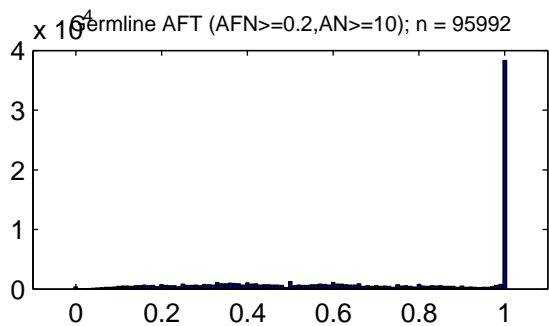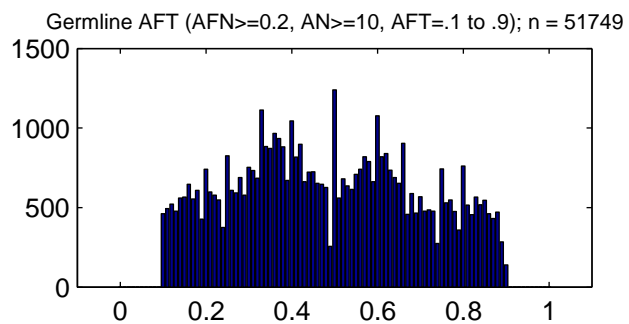

31\_ucsc.edu\_BRCA.IlluminaGA\_DNASeq.Level\_2.13.0.0 -- TCGA-E2-A14O\_D

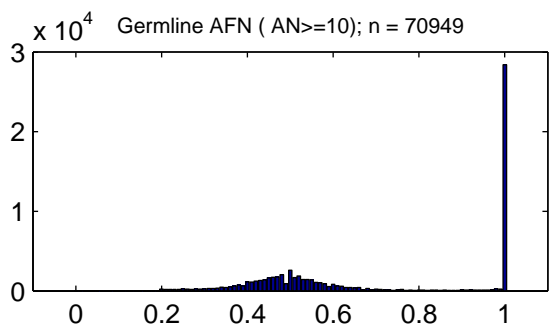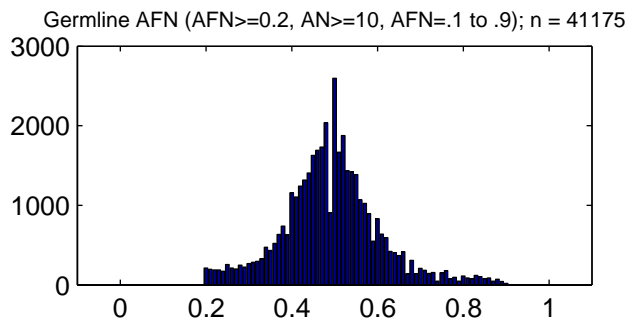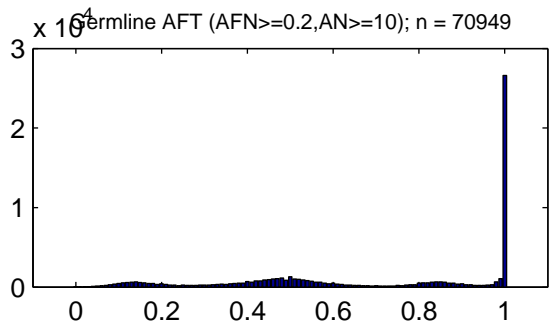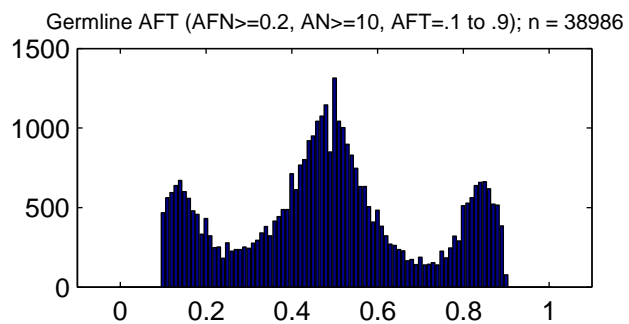



32\_ucsc.edu\_BRCA.IlluminaGA\_DNASeq.Level\_2.11.0.0 -- TCGA-C8-A12W\_D

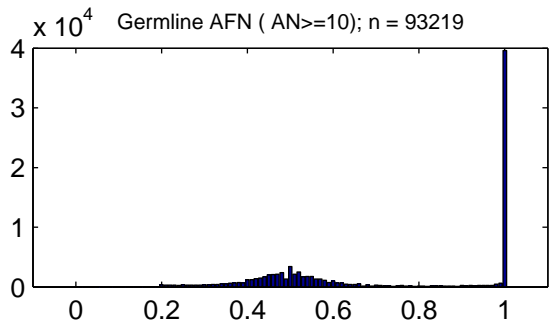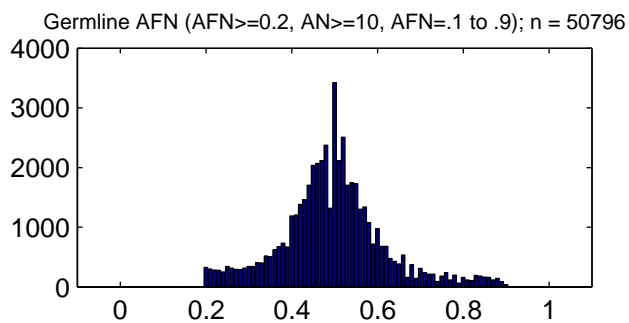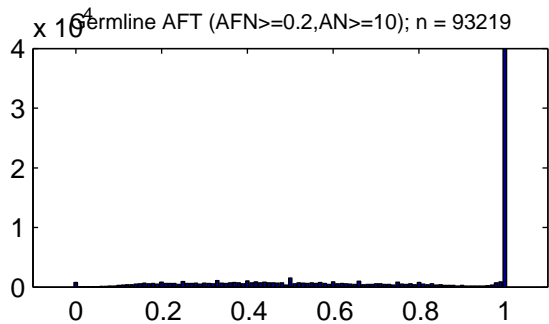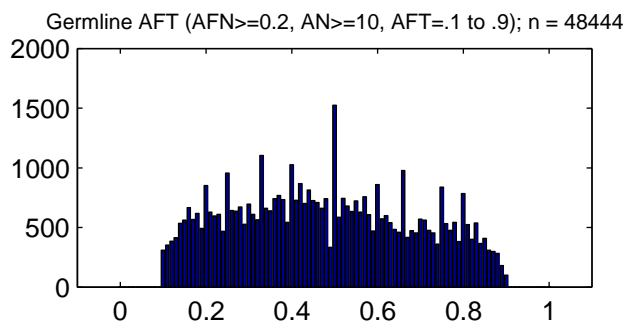

33\_ucsc.edu\_BRCA.IlluminaGA\_DNASeq.Level\_2.5.0.0 --- TCGA-AN-A0FX\_W

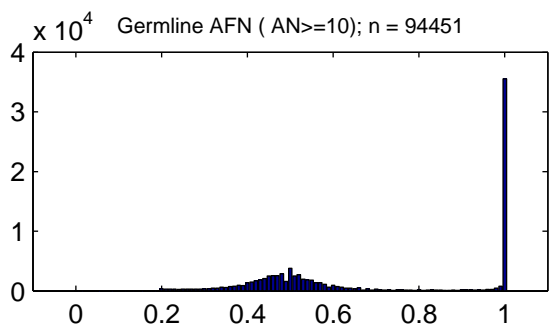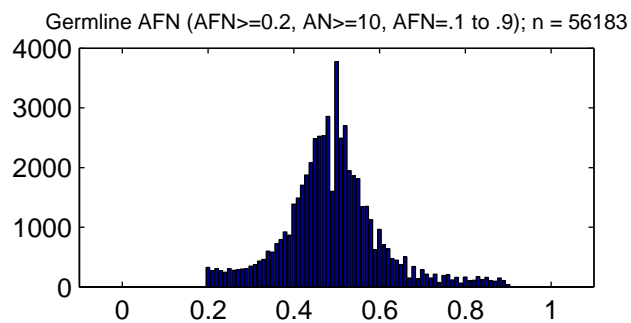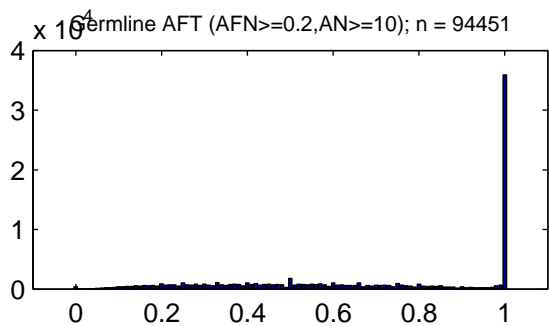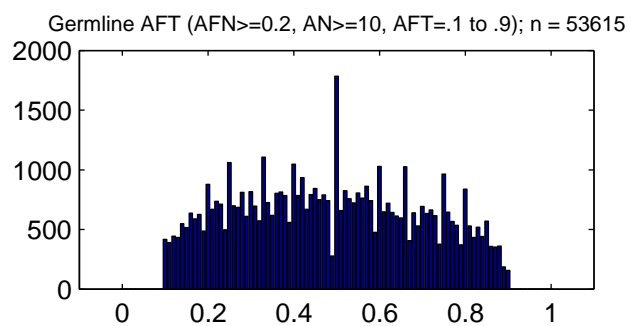

34\_ucsc.edu\_BRCA.IlluminaGA\_DNASeq.Level\_2.10.0.0 -- TCGA-BH-A18Q\_D

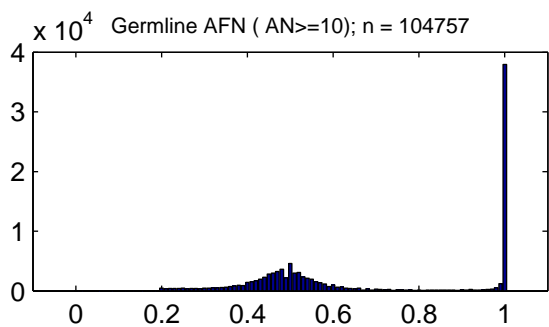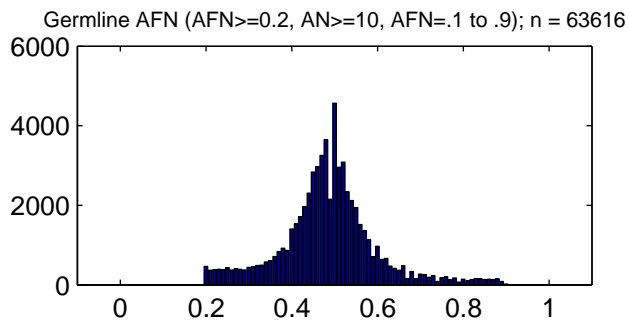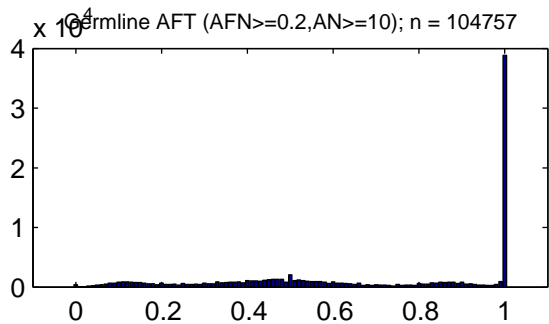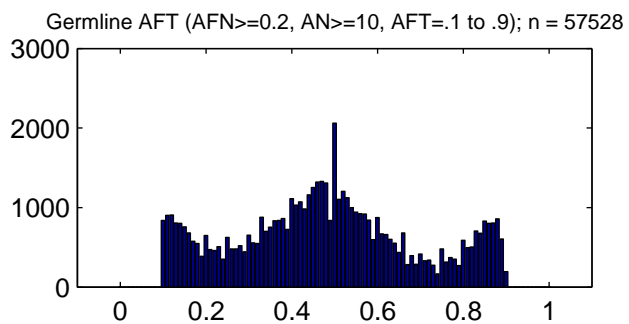

35\_ucsc.edu\_BRCA.IlluminaGA\_DNASeq.Level\_2.6.0.0 -- TCGA-AO-A0J7\_W

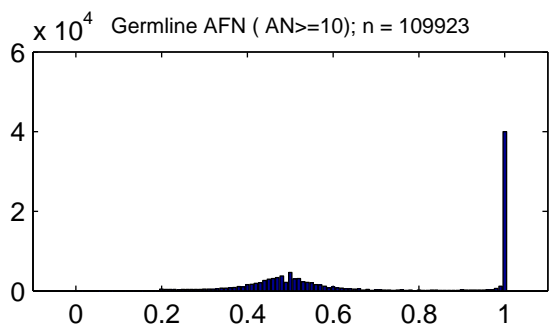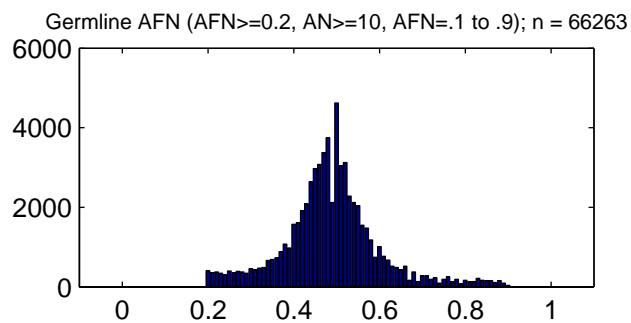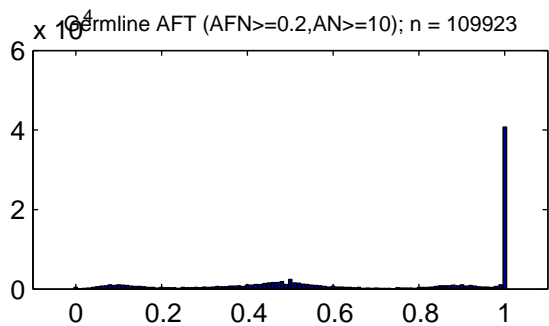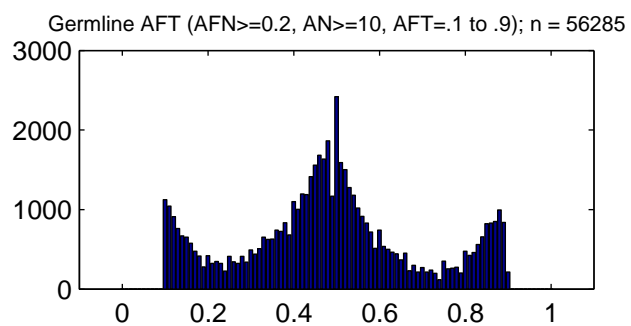

36\_ucsc.edu\_BRCA.IlluminaGA\_DNASeq.Level\_2.6.0.0 -- TCGA-AO-A0J6\_W

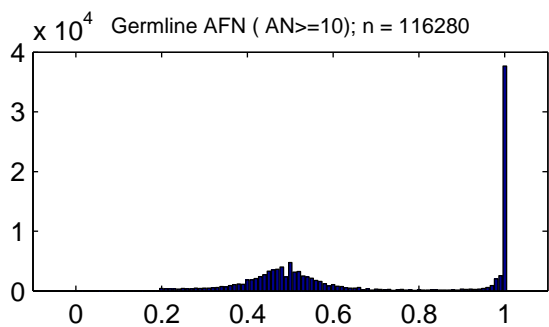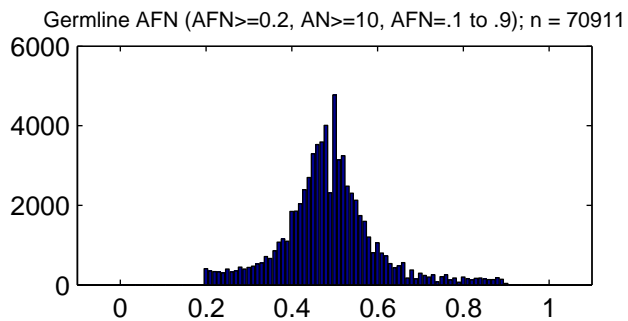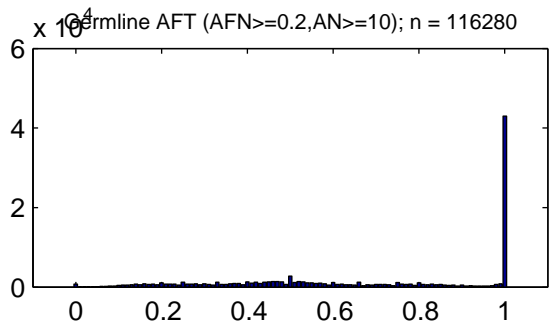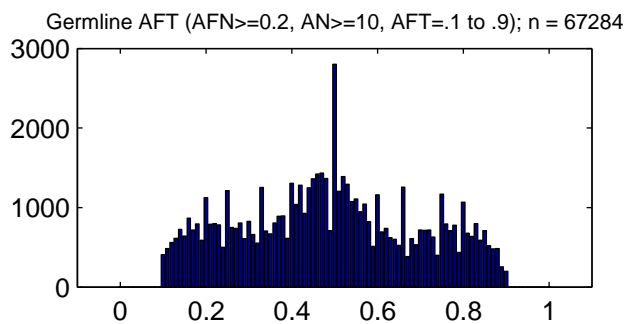

37\_ucsc.edu\_BRCA.IlluminaGA\_DNASeq.Level\_2.6.0.0 -- TCGA-AO-A0J2\_W

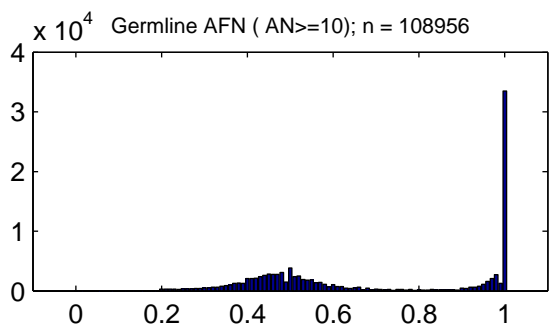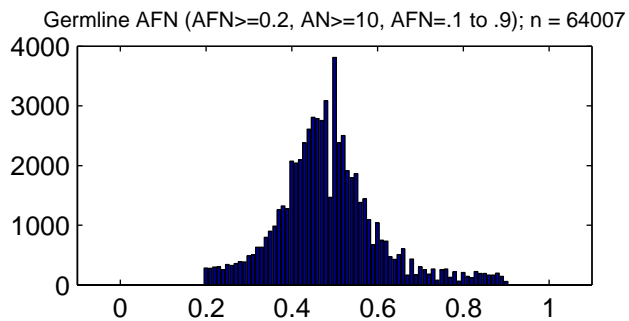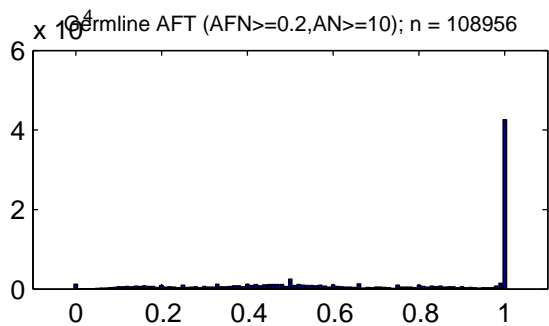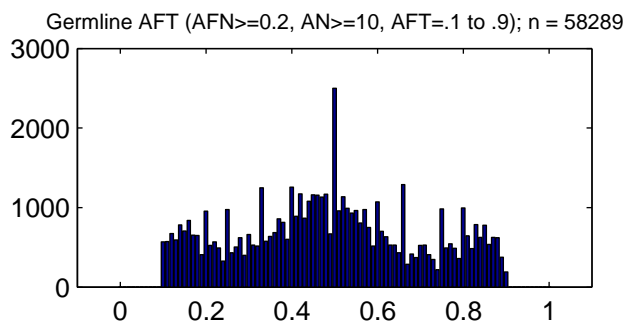

38\_ucsc.edu\_BRCA.IlluminaGA\_DNASeq.Level\_2.8.0.0 -- TCGA-AR-A1AH\_D

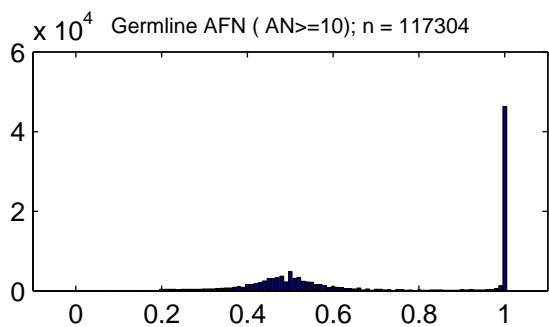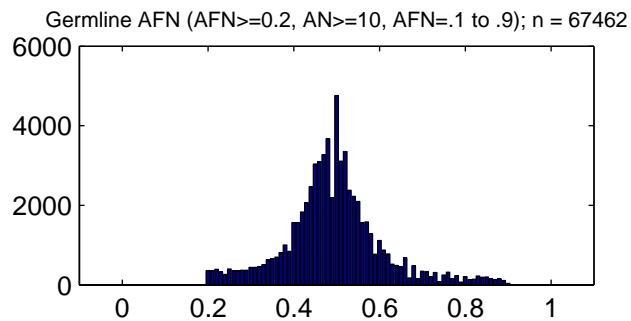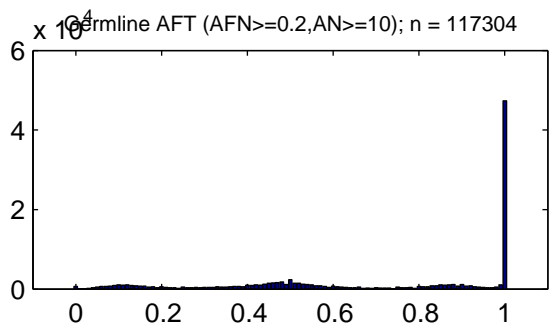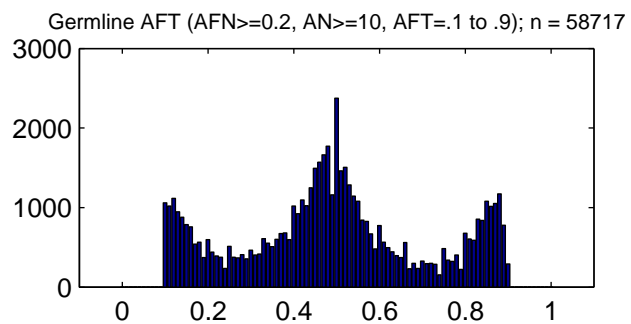

39\_ucsc.edu\_BRCA.IlluminaGA\_DNASeq.Level\_2.4.0.0 -- TCGA-A8-A06U\_W

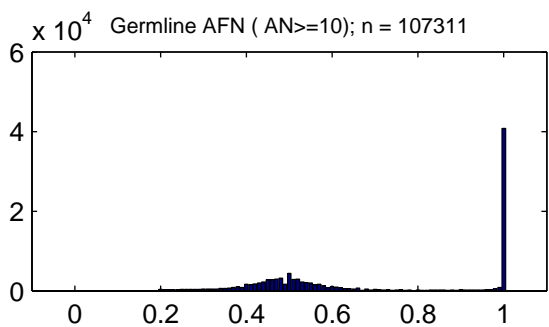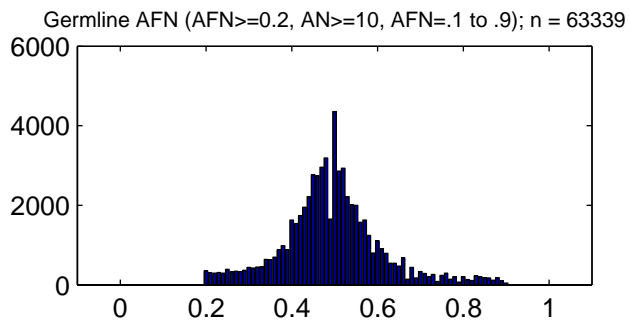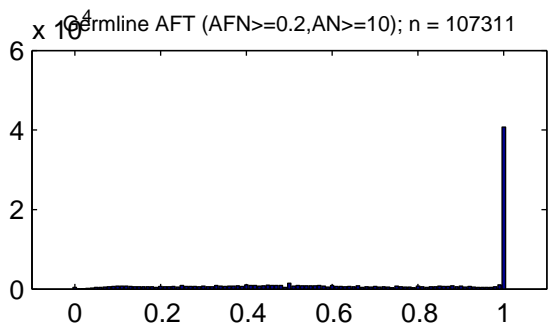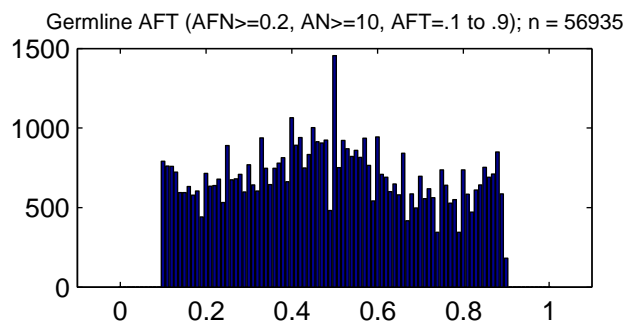



40\_ucsc.edu\_BRCA.IlluminaGA\_DNASeq.Level\_2.14.0.0 -- TCGA-A2-A04P\_W

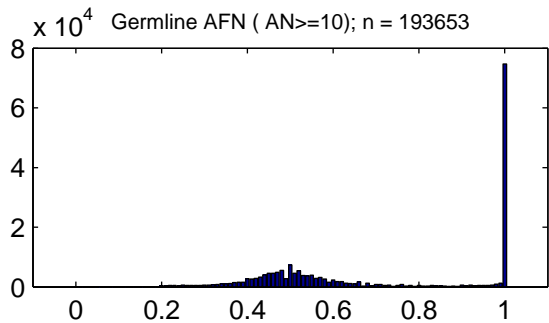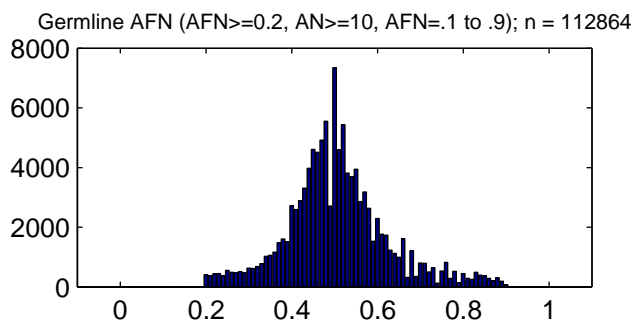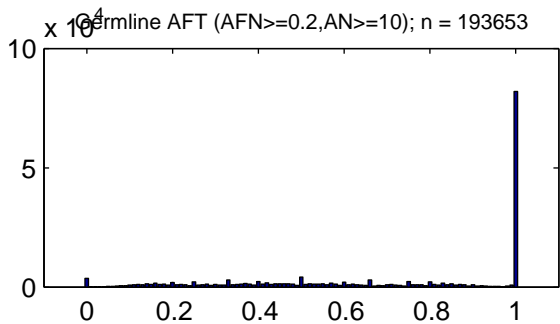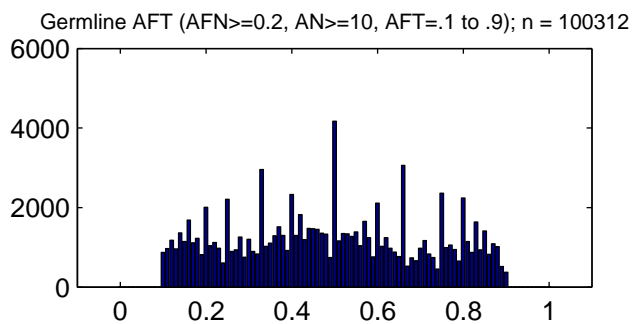

41\_ucsc.edu\_BRCA.IlluminaGA\_DNASeq.Level\_2.14.0.0 -- TCGA-AN-A0FY\_W

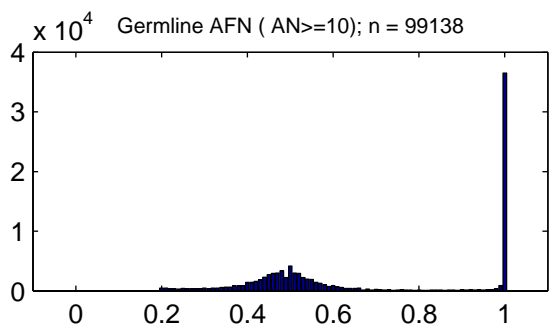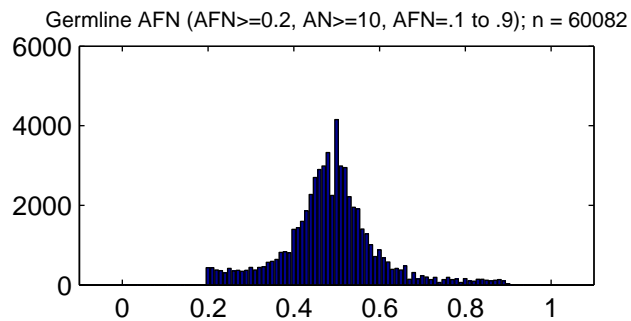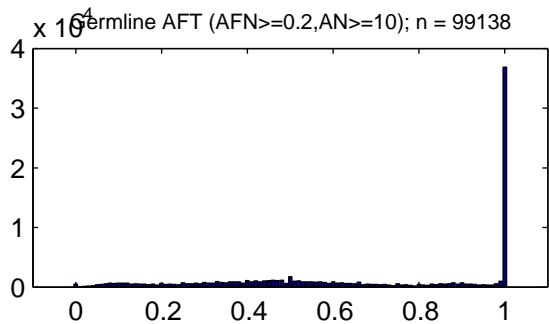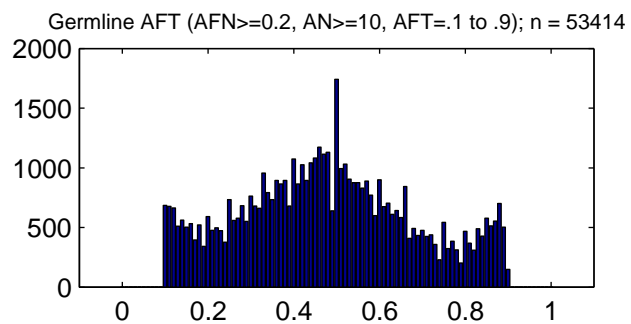

42\_ucsc.edu\_BRCA.IlluminaGA\_DNASeq.Level\_2.9.0.0 --- TCGA-B6-A0RE\_W

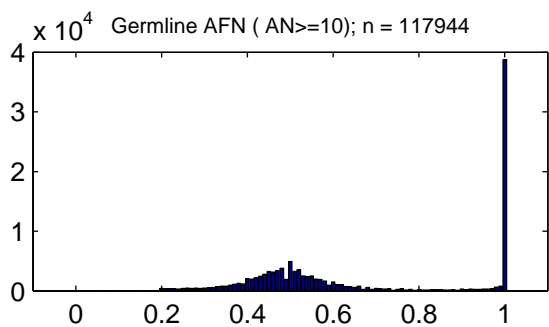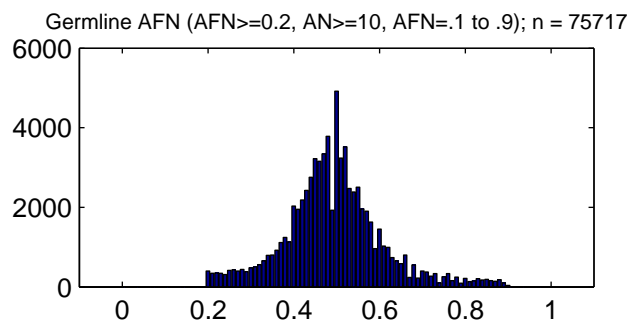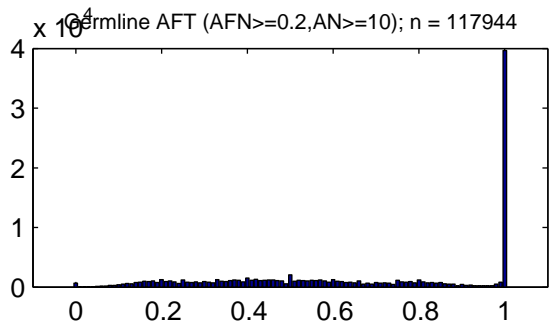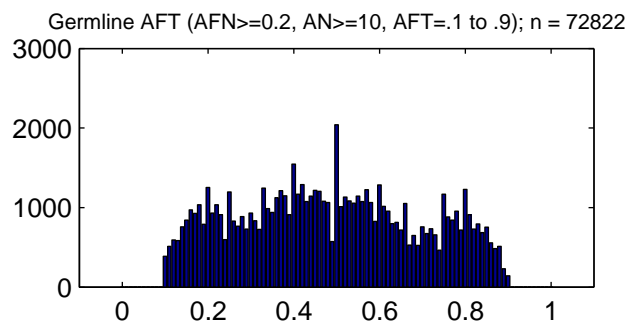

43\_ucsc.edu\_BRCA.IlluminaGA\_DNASeq.Level\_2.8.0.0 -- TCGA-AR-A0U3\_D

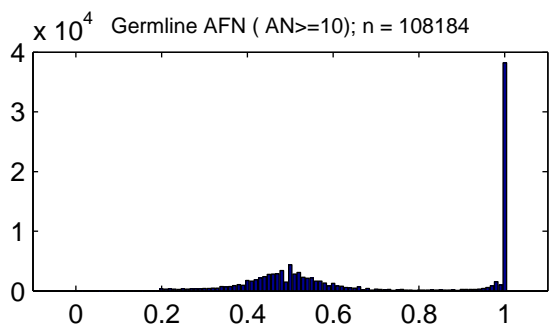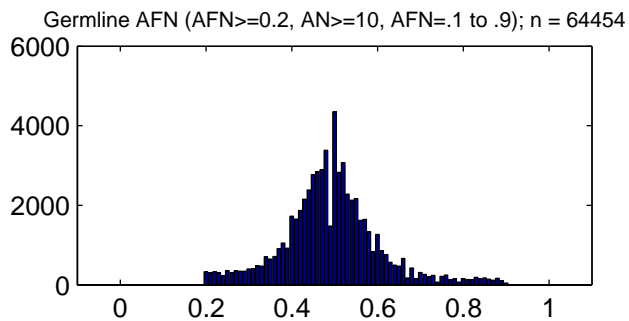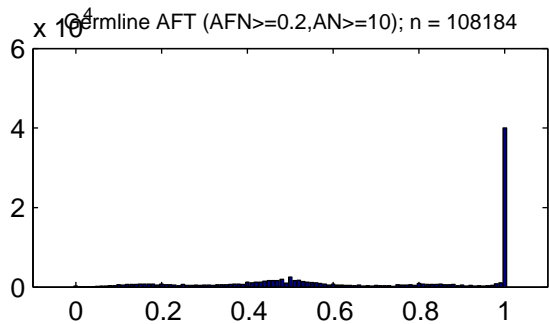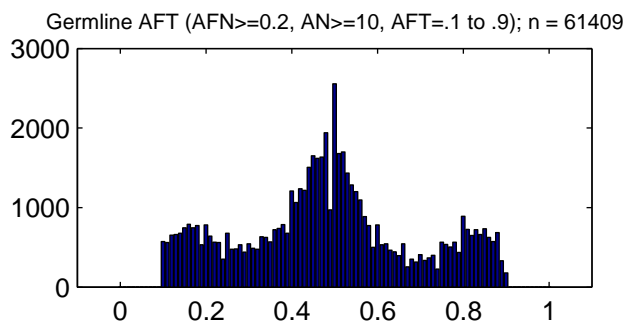

44\_ucsc.edu\_BRCA.IlluminaGA\_DNASeq.Level\_2.11.0.0 -- TCGA-C8-A1HM\_D

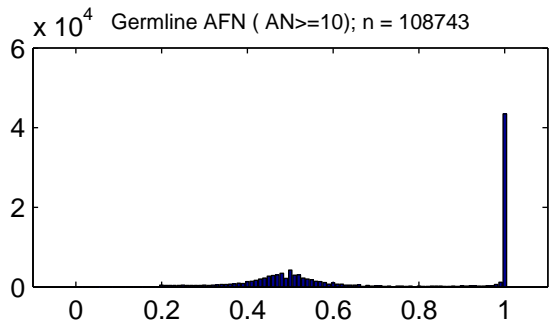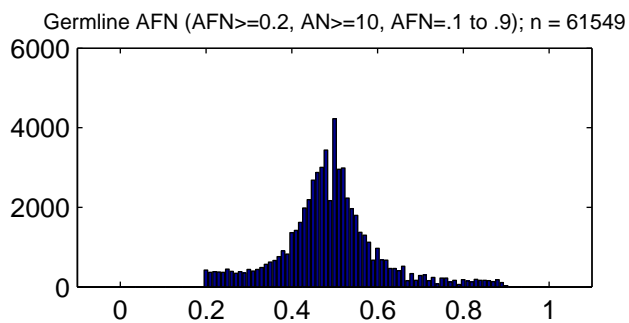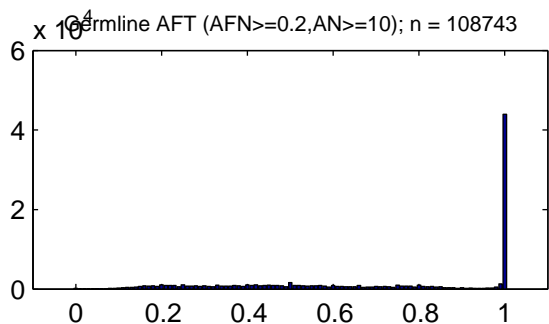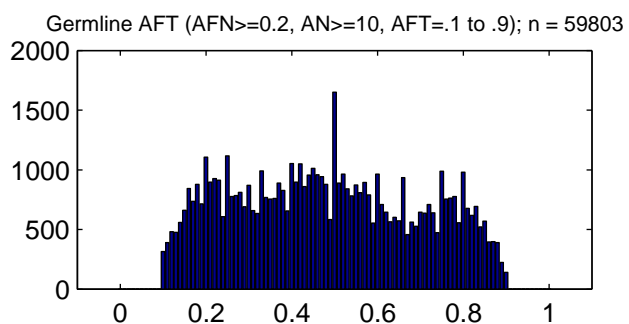

45\_ucsc.edu\_BRCA.IlluminaGA\_DNASeq.Level\_2.9.0.0 -- TCGA-B6-A018\_W

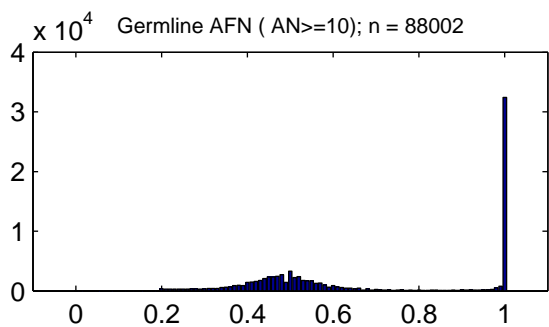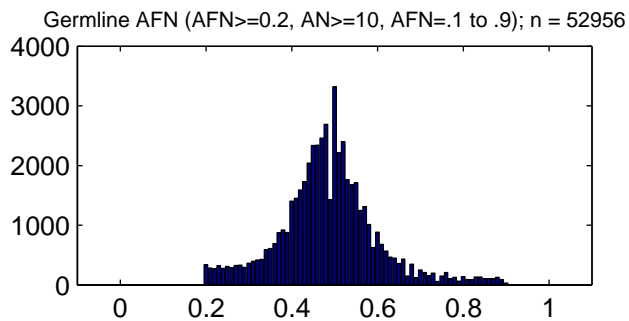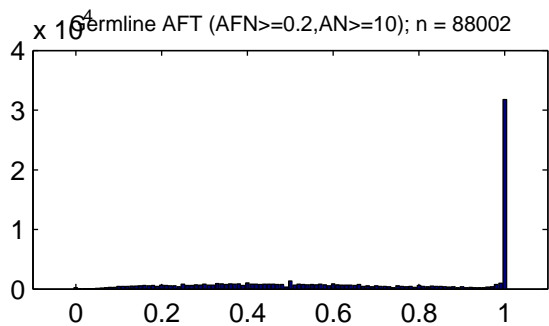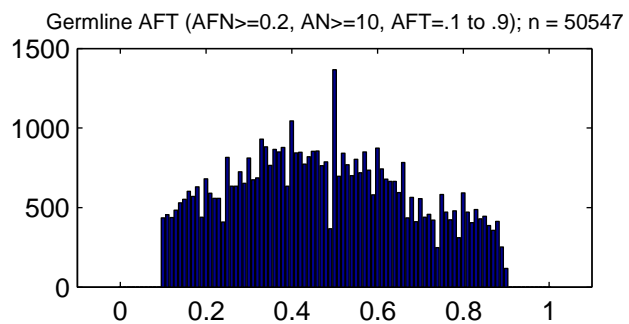

46\_ucsc.edu\_BRCA.IlluminaGA\_DNASeq.Level\_2.12.0.0 -- TCGA-D8-A13Y\_D

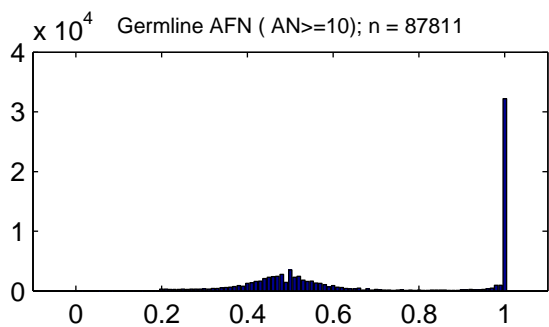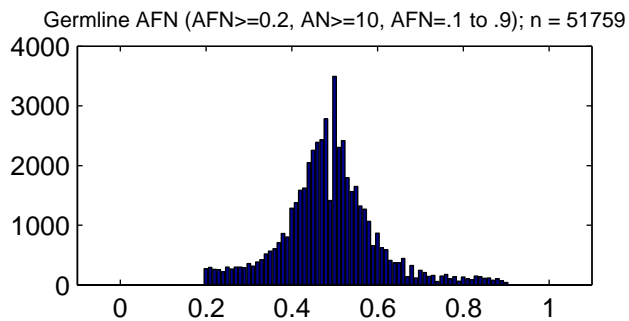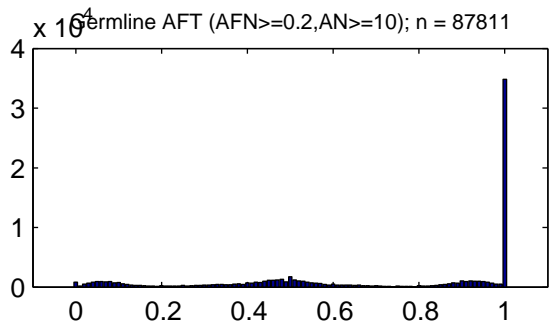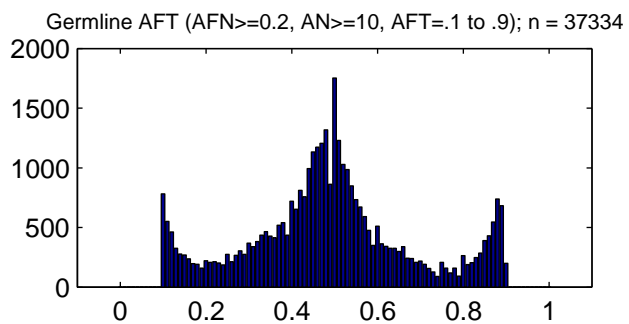

47\_ucsc.edu\_BRCA.IlluminaGA\_DNASeq.Level\_2.12.0.0 --- TCGA-D8-A13Z\_D

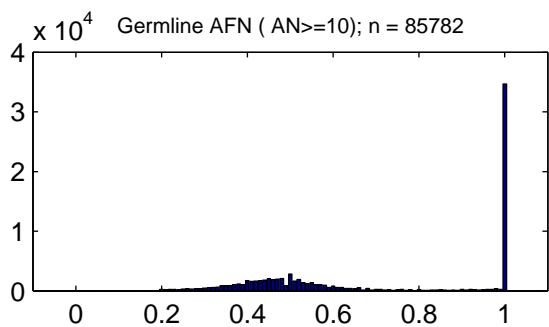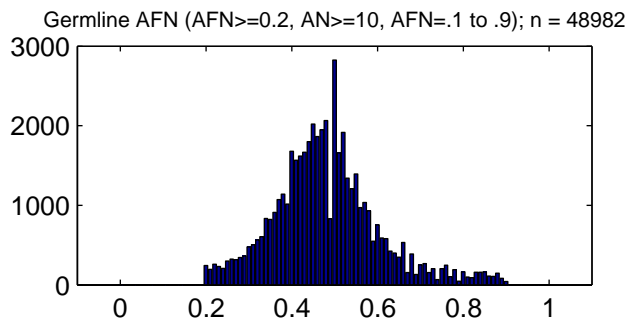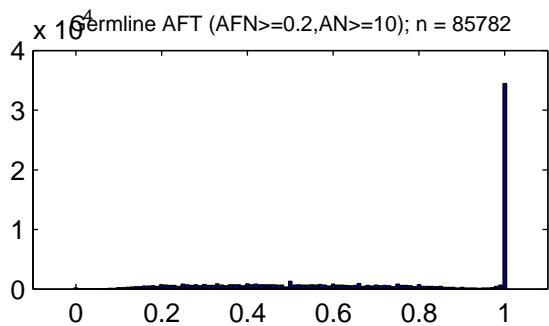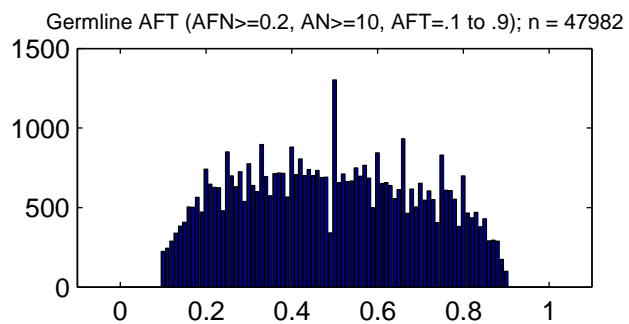



48\_ucsc.edu\_BRCA.IlluminaGA\_DNASeq.Level\_2.5.0.0 -- TCGA-AN-A0FJ\_W

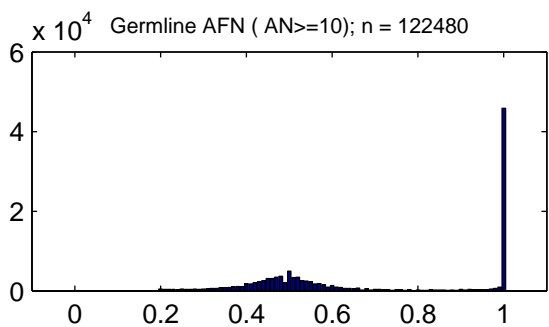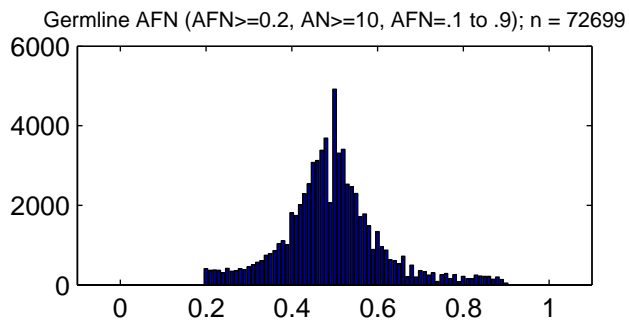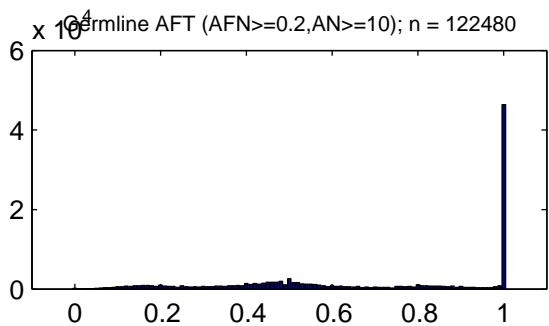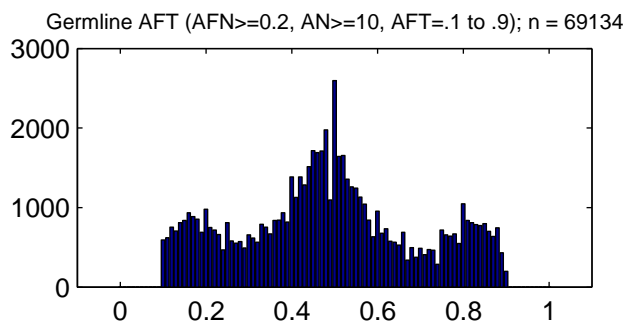

49\_ucsc.edu\_BRCA.IlluminaGA\_DNASeq.Level\_2.11.0.0 -- TCGA-C8-A12U\_D

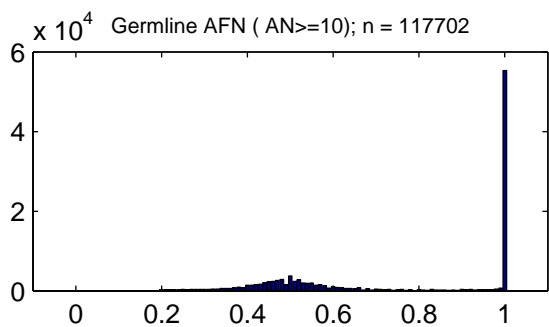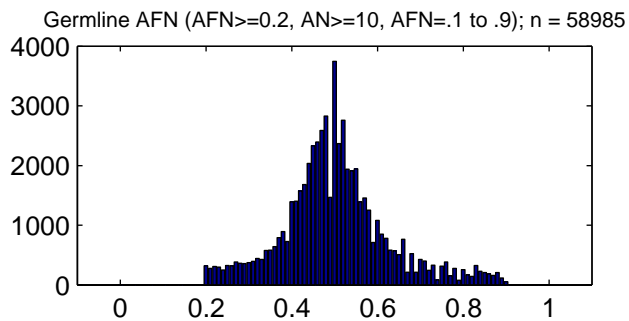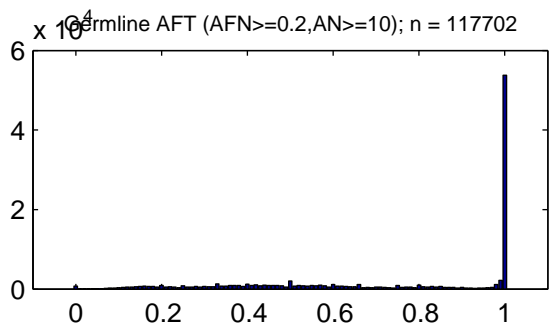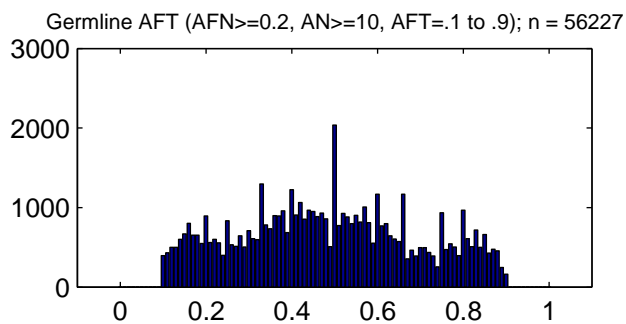

50\_ucsc.edu\_BRCA.IlluminaGA\_DNASeq.Level\_2.7.0.0 -- TCGA-AQ-A04L\_D

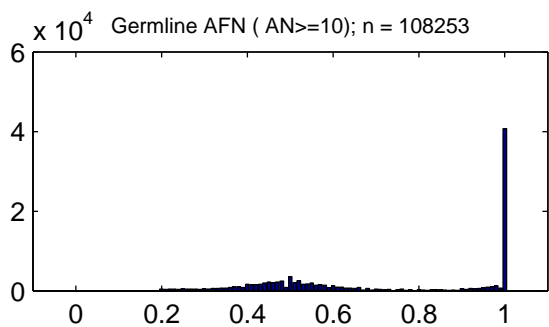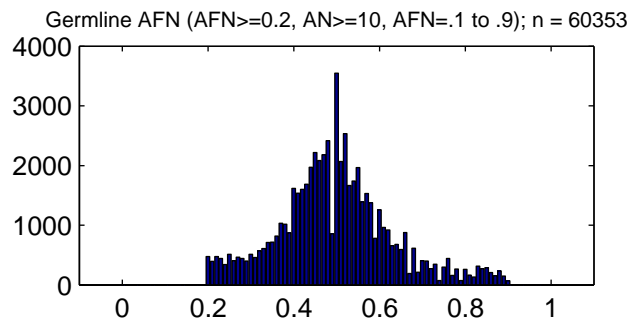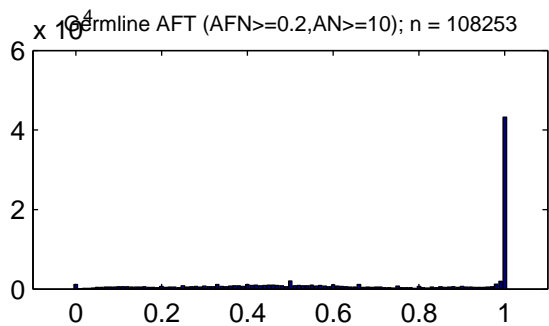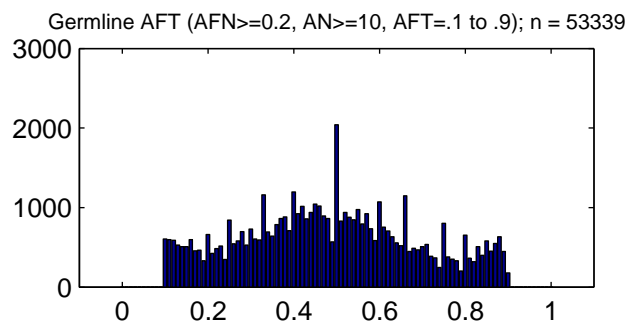

51\_ucsc.edu\_BRCA.IlluminaGA\_DNASeq.Level\_2.10.0.0 -- TCGA-BH-A0HY\_W

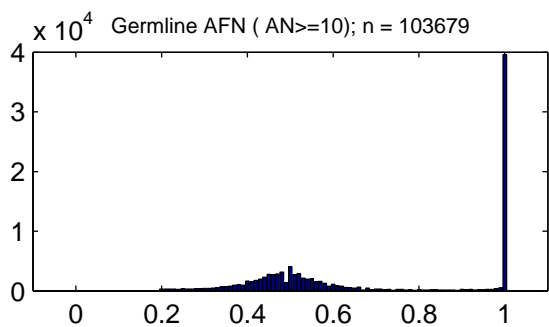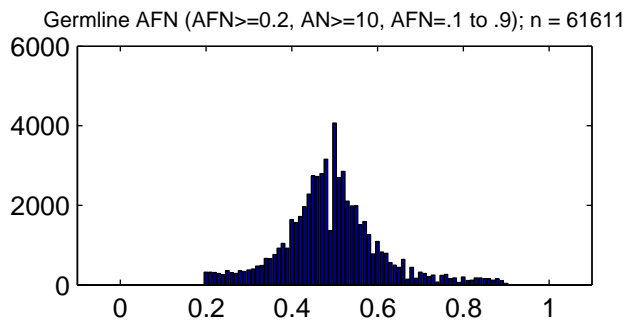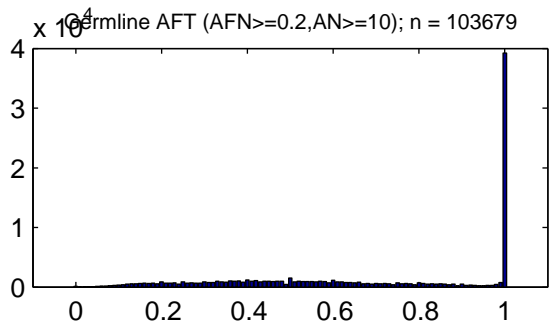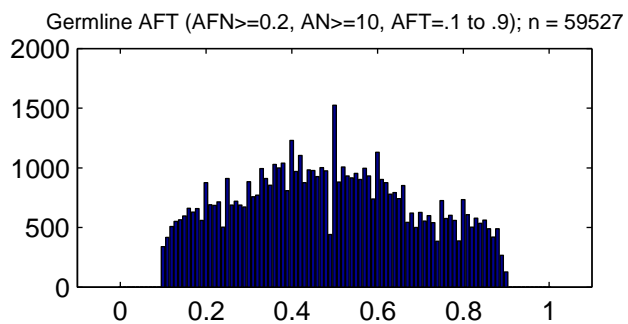

52\_ucsc.edu\_BRCA.IlluminaGA\_DNASeq.Level\_2.13.0.0 -- TCGA-E2-A14P\_D

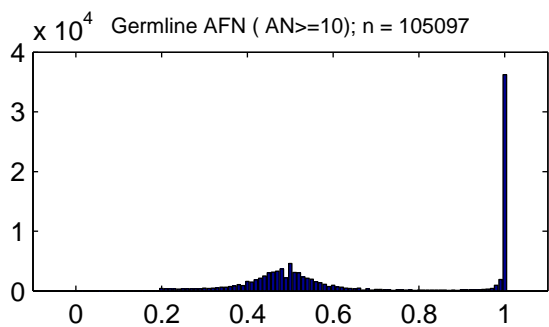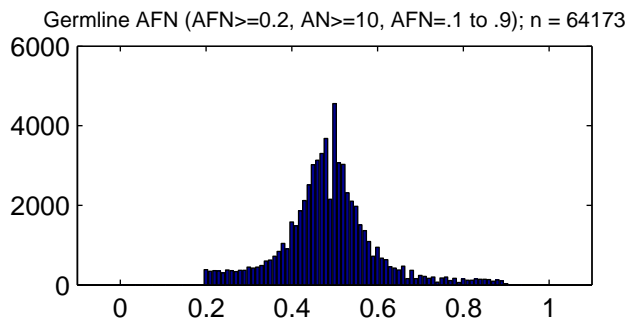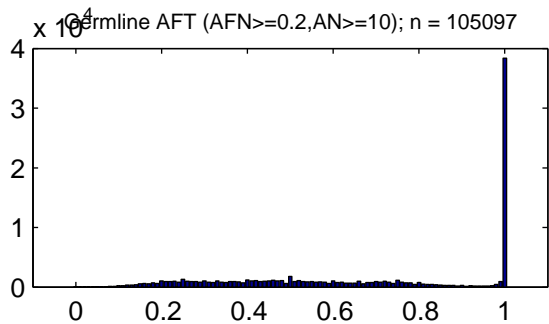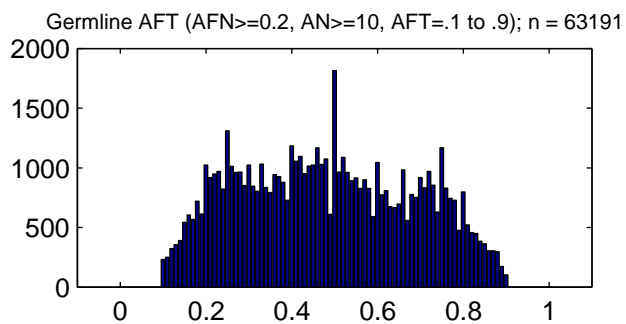

53\_ucsc.edu\_BRCA.IlluminaGA\_DNASeq.Level\_2.9.0.0 -- TCGA-B6-A019\_W

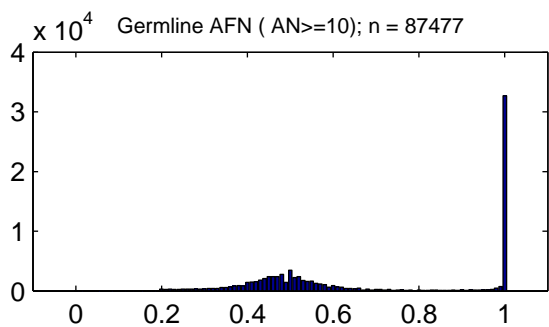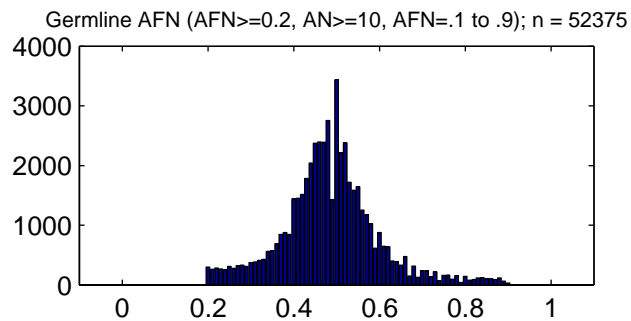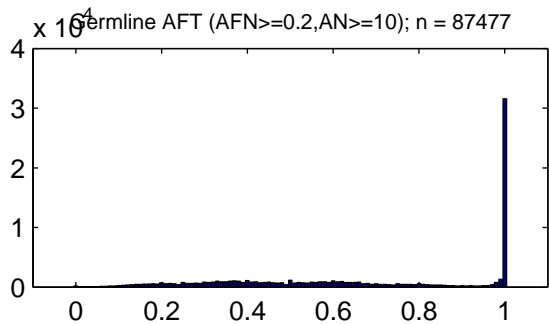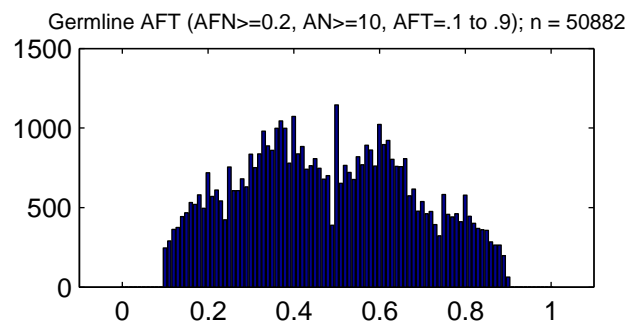

54\_ucsc.edu\_BRCA.IlluminaGA\_DNASeq.Level\_2.3.0.0 -- TCGA-A7-A0CJ\_W

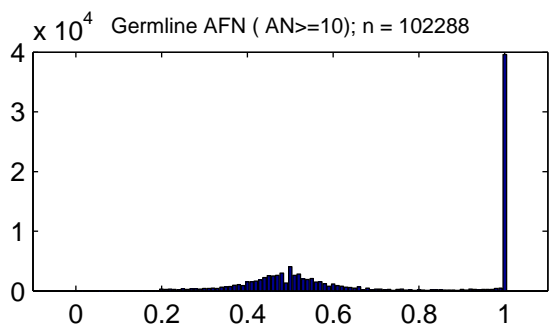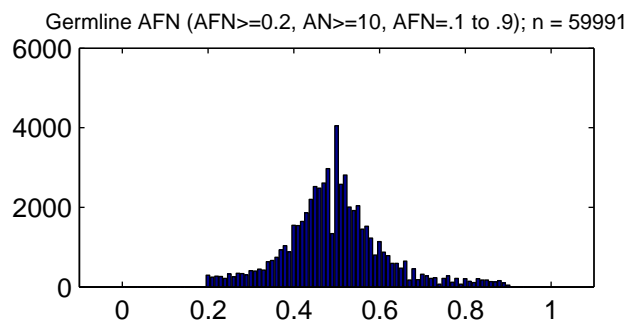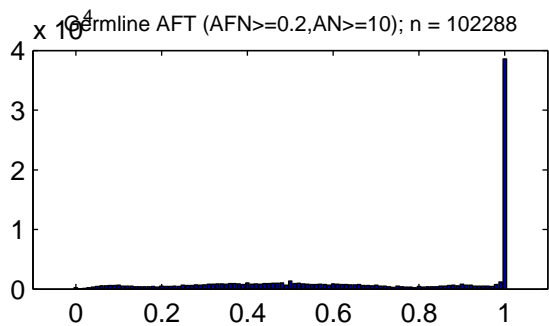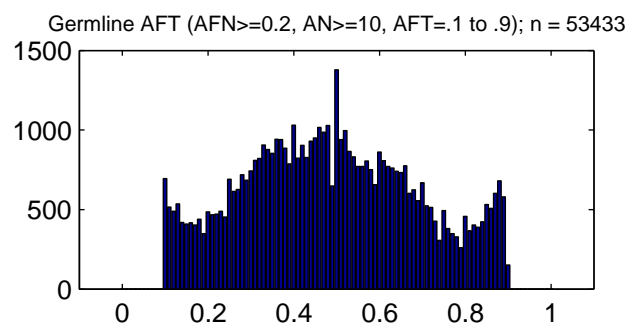

55\_ucsc.edu\_BRCA.IlluminaGA\_DNASeq.Level\_2.2.0.0 -- TCGA-A2-A0CT\_W

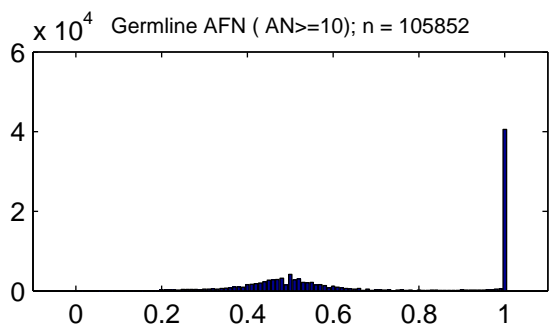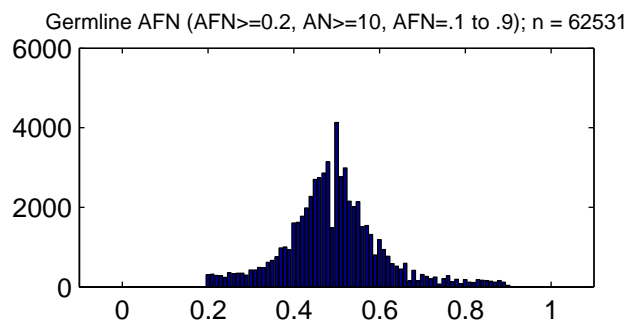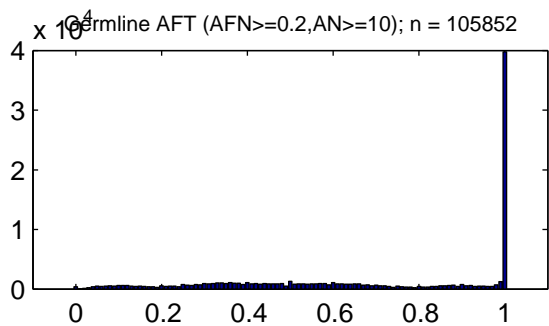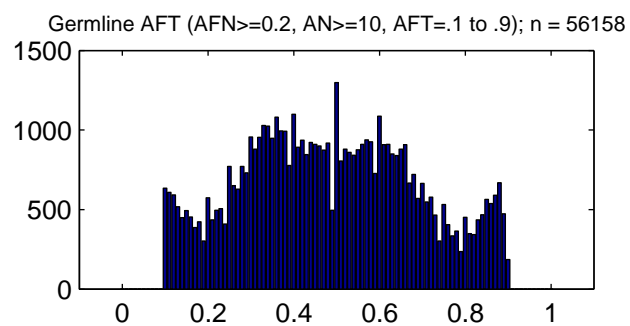



56\_ucsc.edu\_BRCA.IlluminaGA\_DNASeq.Level\_2.8.0.0 -- TCGA-AR-A0U2\_D

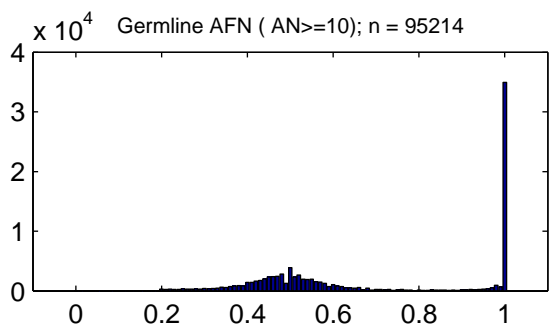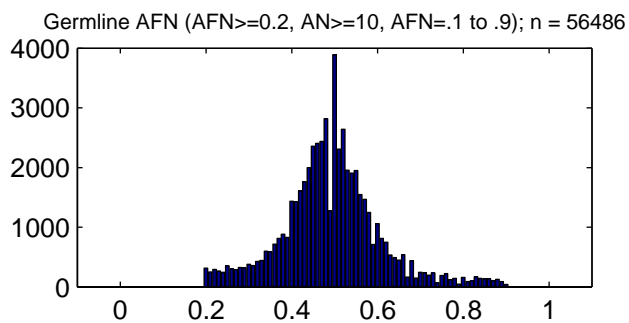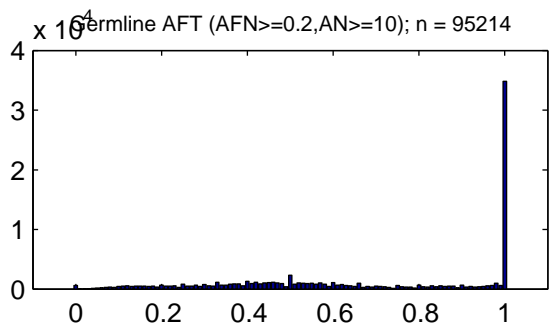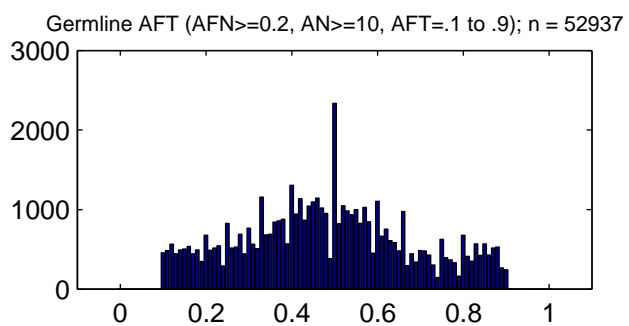

57\_ucsc.edu\_BRCA.IlluminaGA\_DNASeq.Level\_2.3.0.0 -- TCGA-A7-A0CE\_W

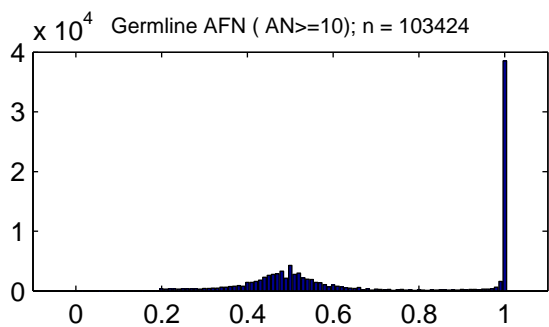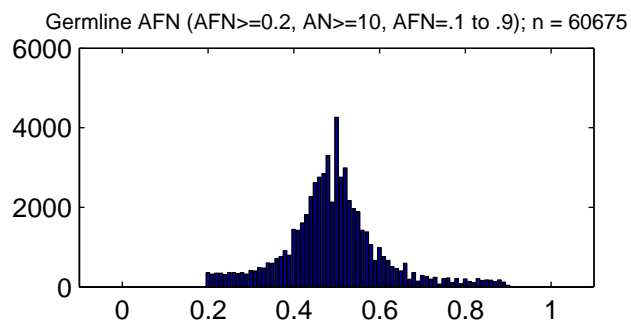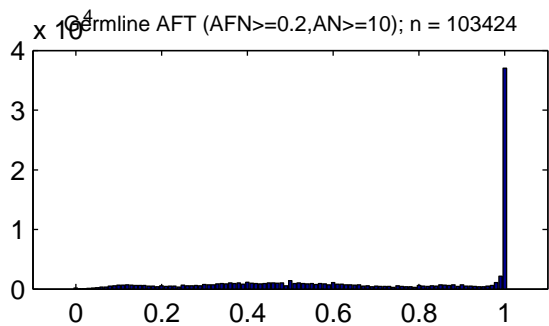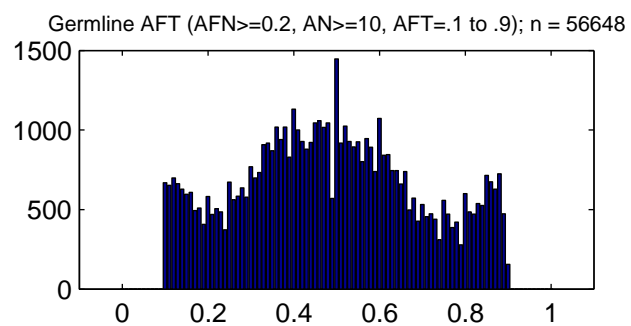

58\_ucsc.edu\_BRCA.IlluminaGA\_DNASeq.Level\_2.5.0.0 -- TCGA-AN-A0AR\_W

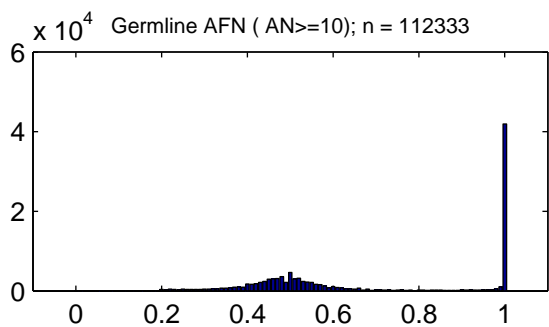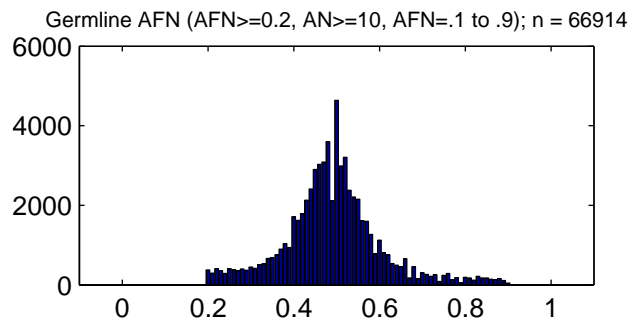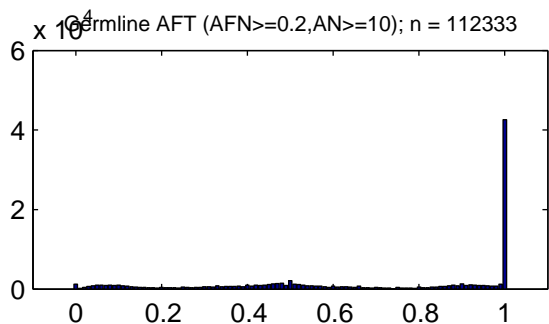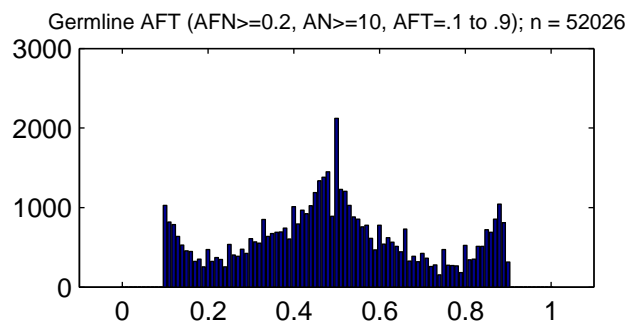

59\_ucsc.edu\_BRCA.IlluminaGA\_DNASeq.Level\_2.10.0.0 -- TCGA-BH-A0BG\_D

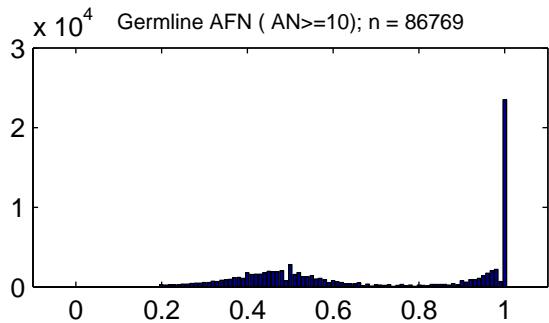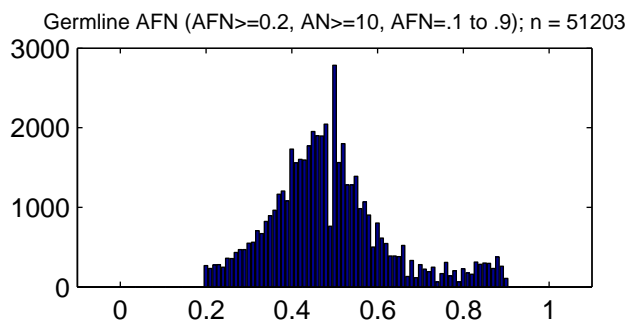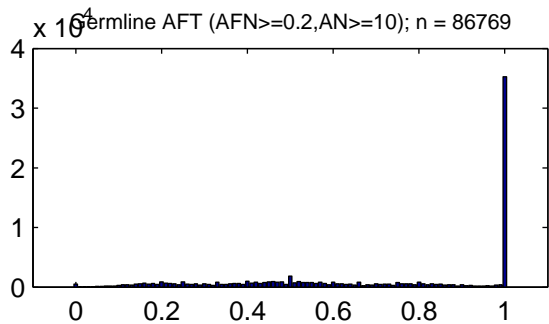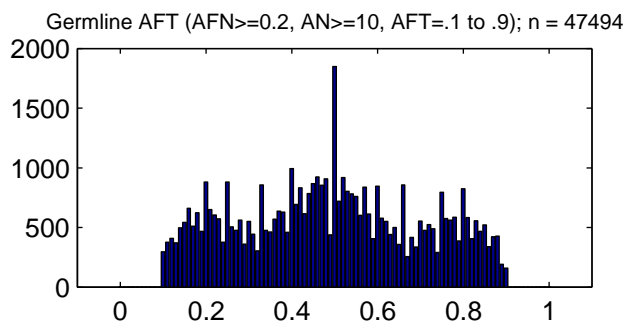

60\_ucsc.edu\_BRCA.IlluminaGA\_DNASeq.Level\_2.6.0.0 -- TCGA-AO-A0JL\_W

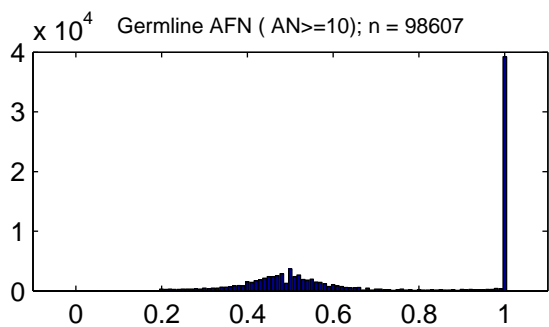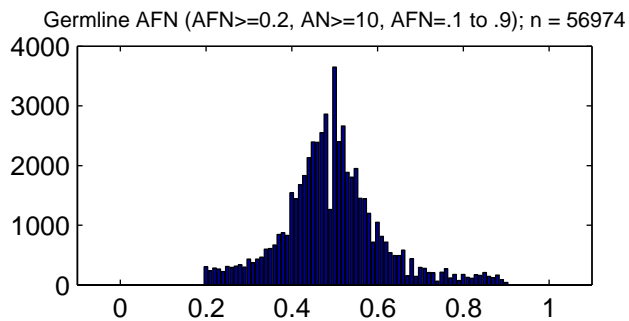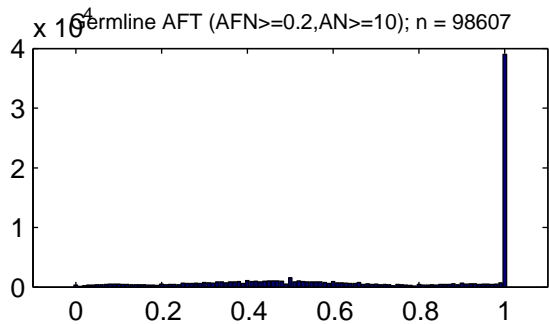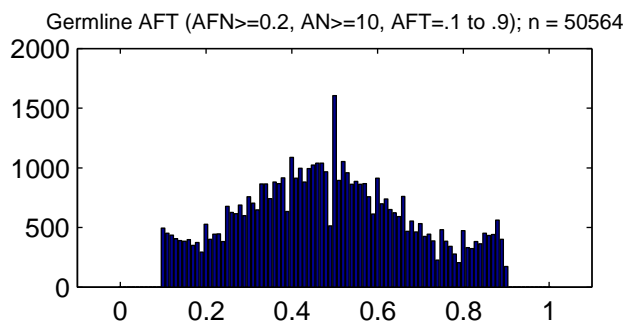

61\_ucsc.edu\_BRCA.IlluminaGA\_DNASeq.Level\_2.4.0.0 -- TCGA-A8-A092\_W

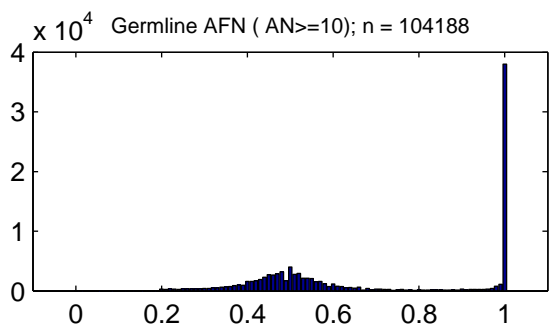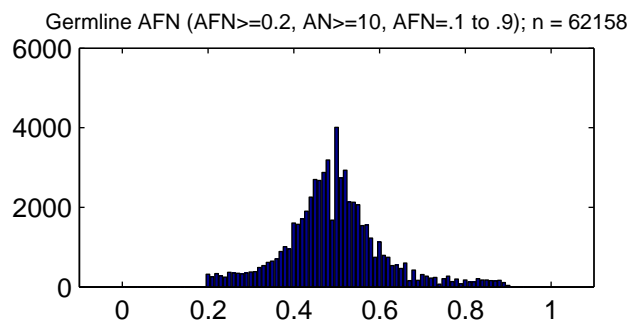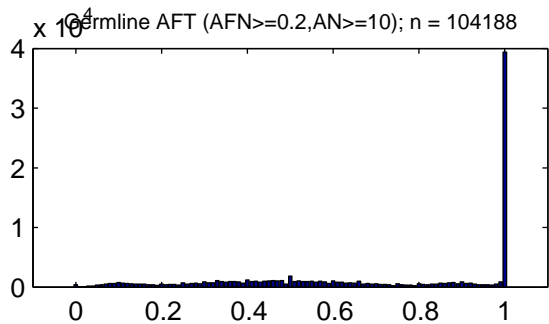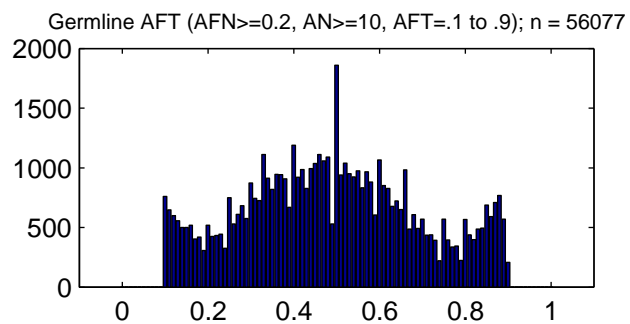

62\_ucsc.edu\_BRCA.IlluminaGA\_DNASeq.Level\_2.3.0.0 -- TCGA-A7-A0DA\_D

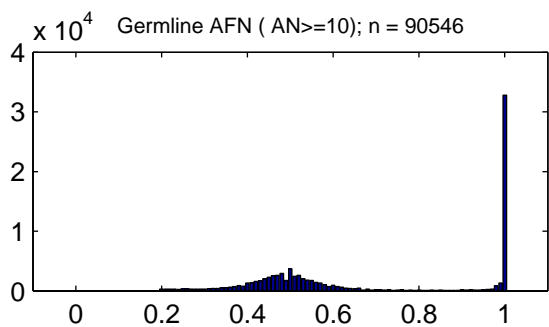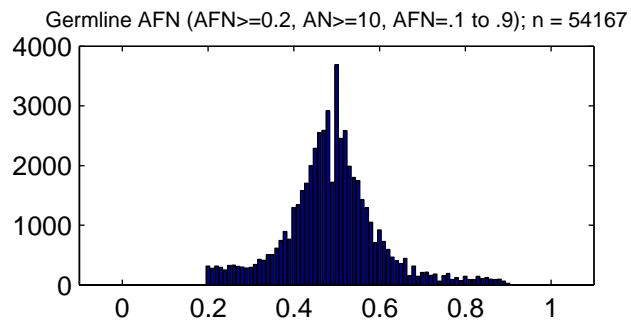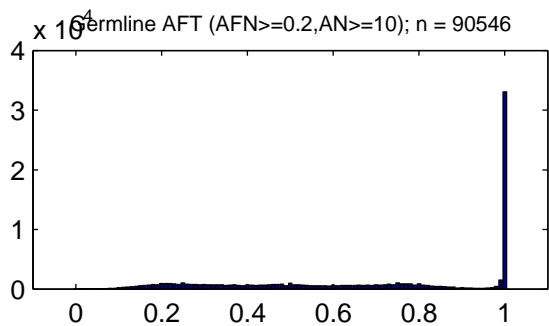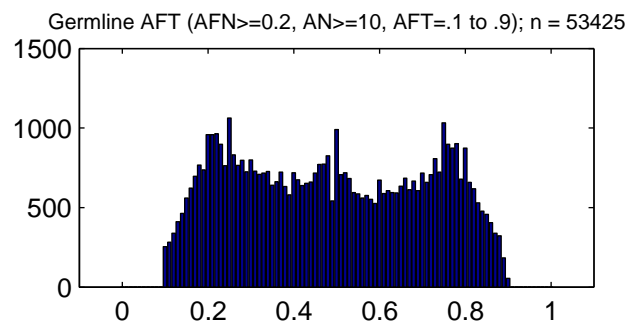

63\_ucsc.edu\_BRCA.IlluminaGA\_DNASeq.Level\_2.5.0.0 -- TCGA-AN-A04A\_W

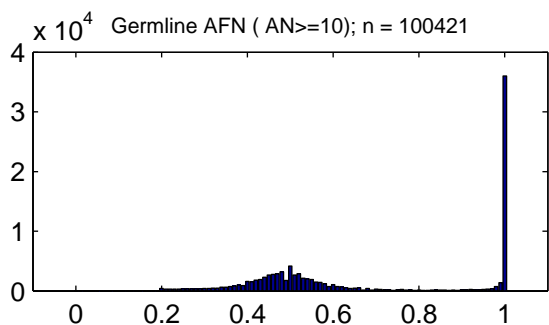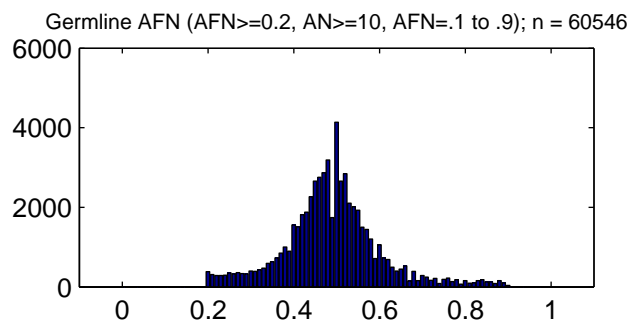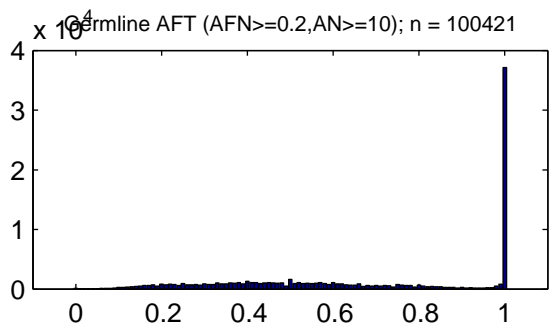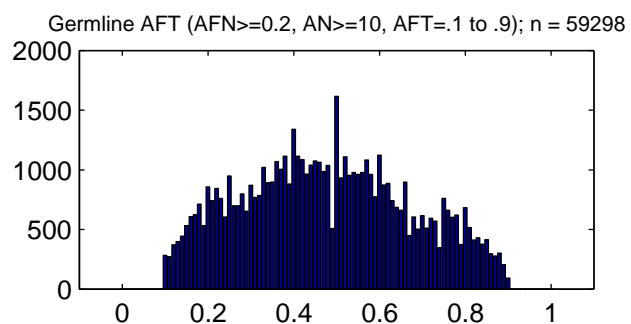



64\_ucsc.edu\_BRCA.IlluminaGA\_DNASeq.Level\_2.13.0.0 -- TCGA-E2-A150\_D

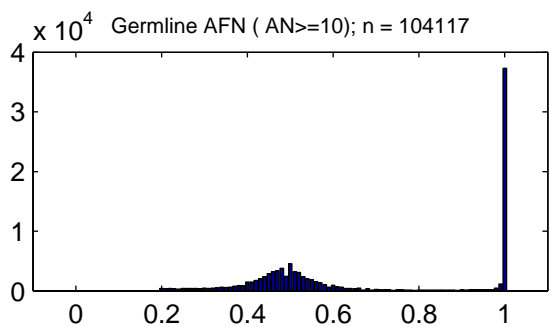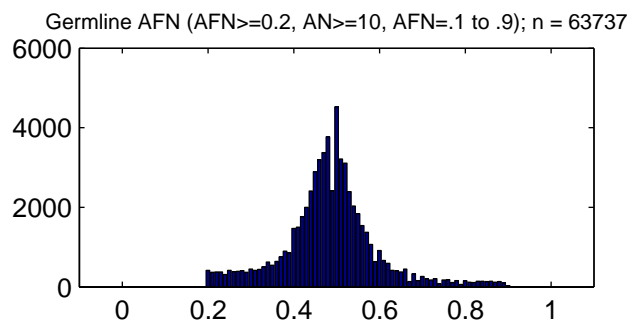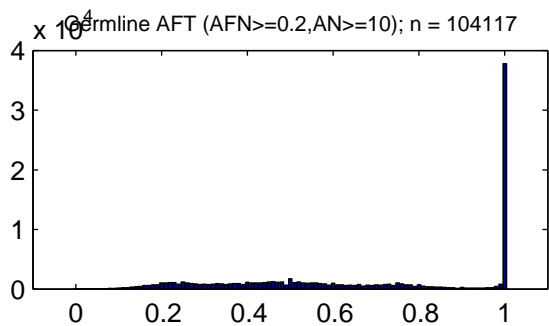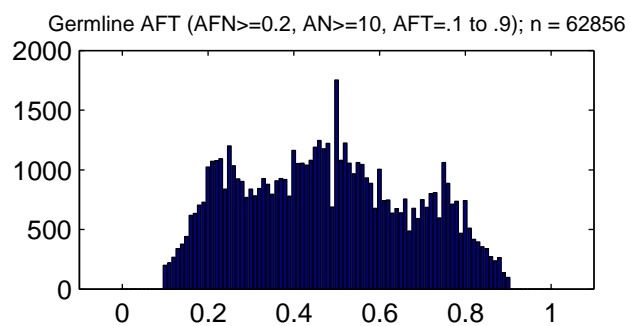

65\_ucsc.edu\_BRCA.IlluminaGA\_DNASeq.Level\_2.11.0.0 -- TCGA-C8-A134\_D

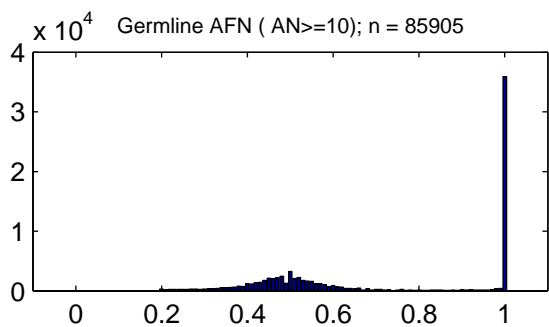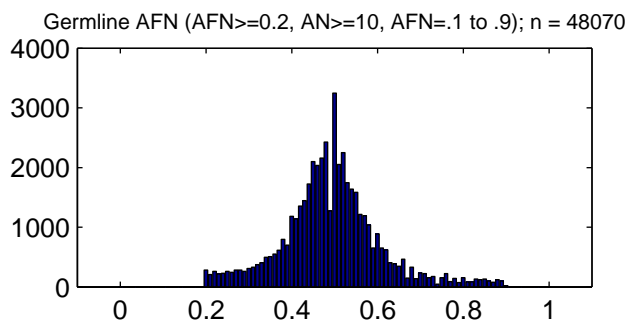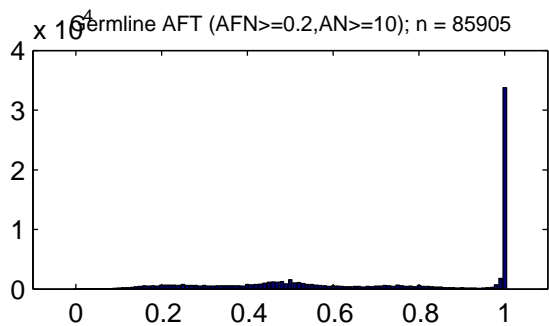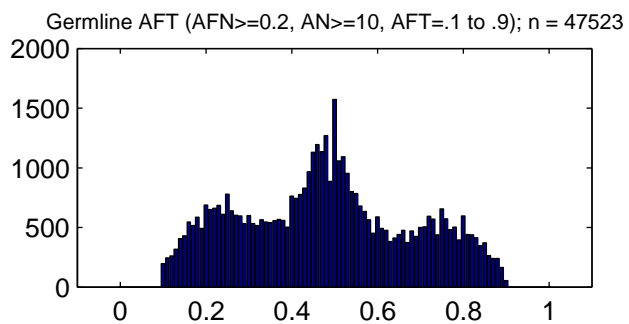

66\_ucsc.edu\_BRCA.IlluminaGA\_DNASeq.Level\_2.4.0.0 -- TCGA-A8-A08R\_W

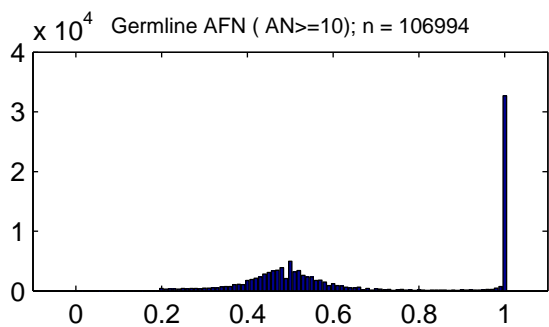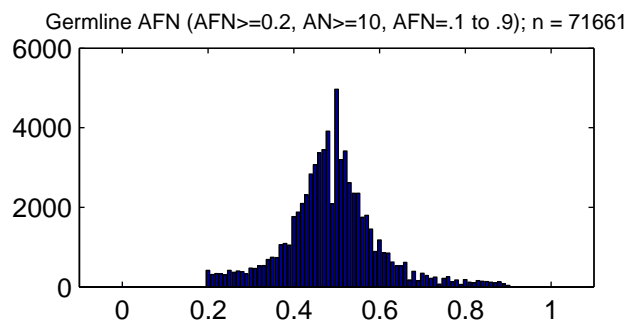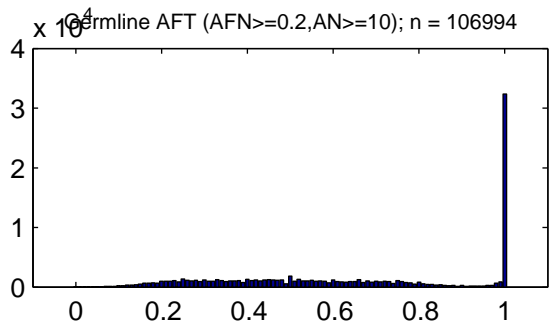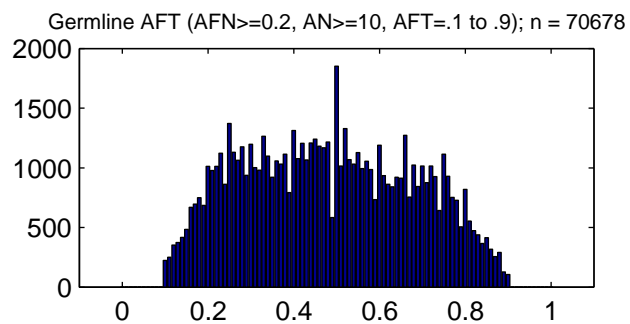

67\_ucsc.edu\_BRCA.IlluminaGA\_DNASeq.Level\_2.14.0.0 -- TCGA-A2-A0SV\_W

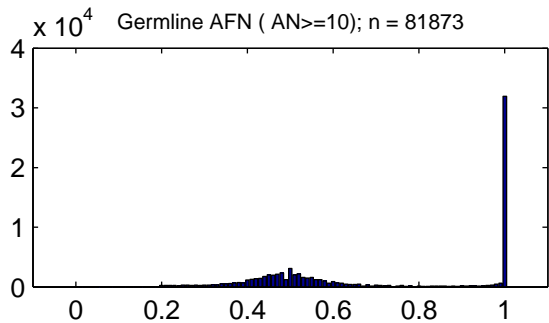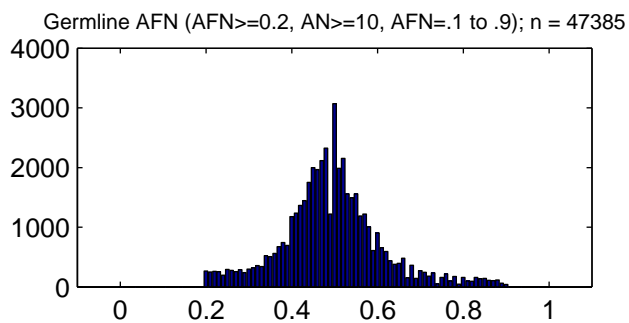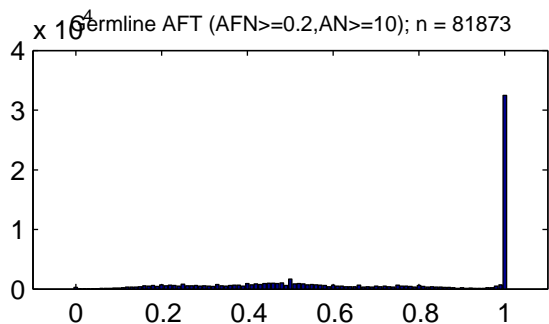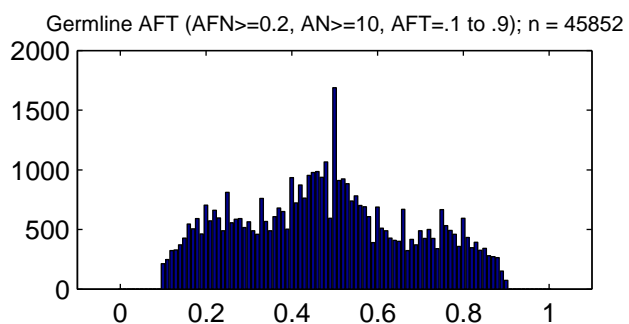

68\_ucsc.edu\_BRCA.IlluminaGA\_DNASeq.Level\_2.10.0.0 -- TCGA-BH-A18U\_D

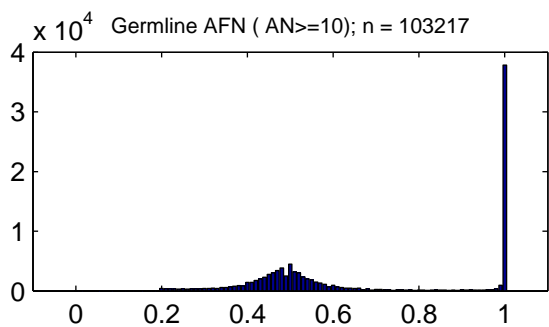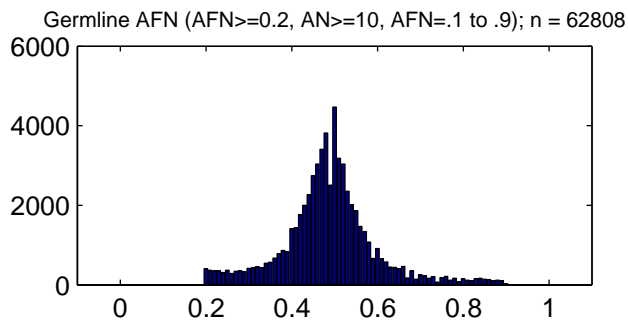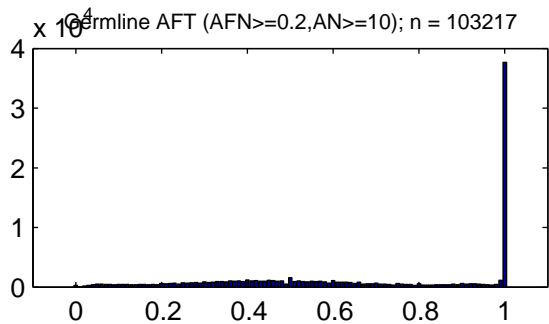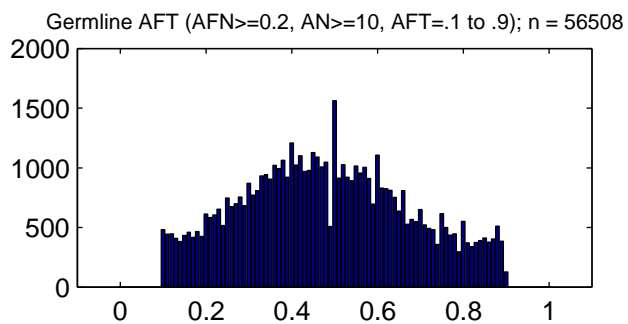

69\_ucsc.edu\_BRCA.IlluminaGA\_DNASeq.Level\_2.4.0.0 -- TCGA-A8-A08L\_W

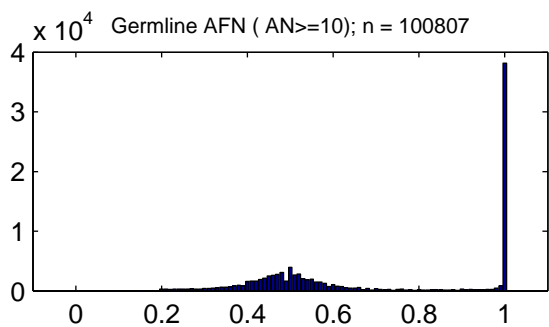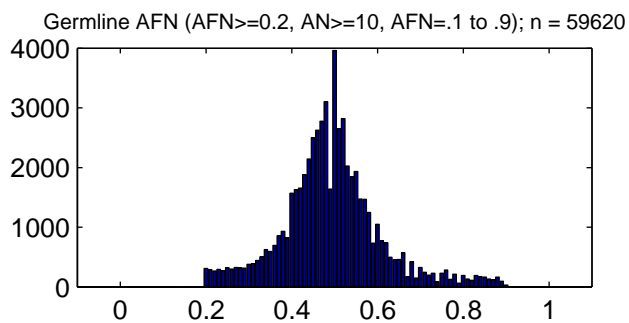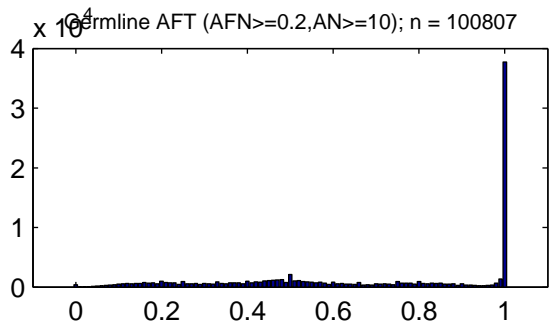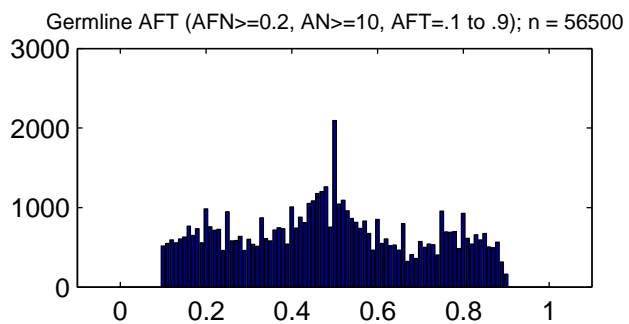

70\_ucsc.edu\_BRCA.IlluminaGA\_DNASeq.Level\_2.4.0.0 -- TCGA-A8-A07L\_W

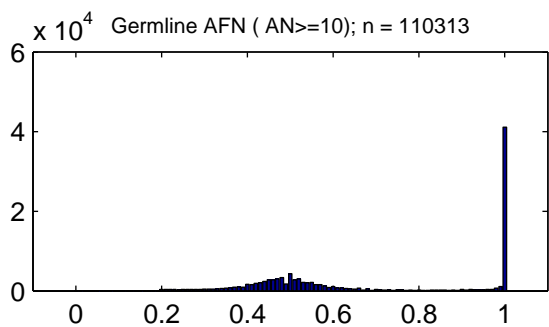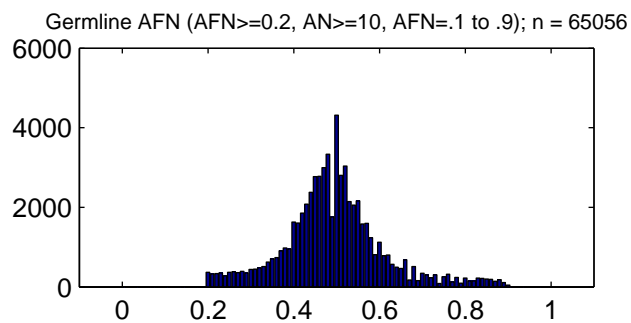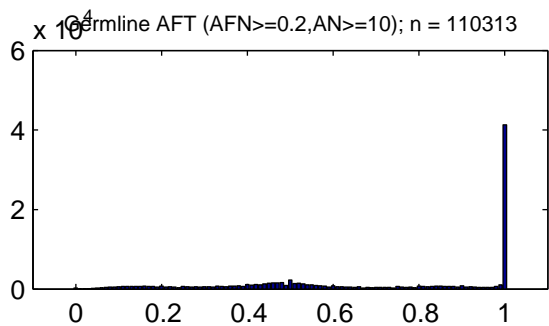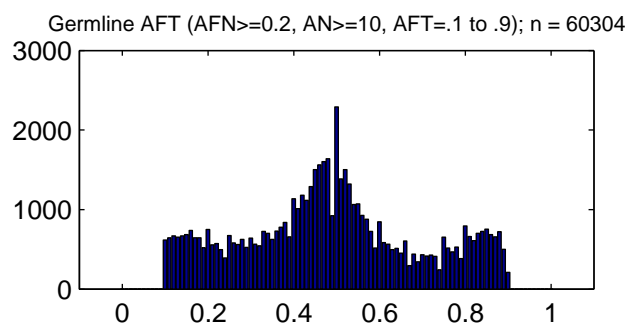

71\_ucsc.edu\_BRCA.IlluminaGA\_DNASeq.Level\_2.10.0.0 --- TCGA-BH-A0BP\_D

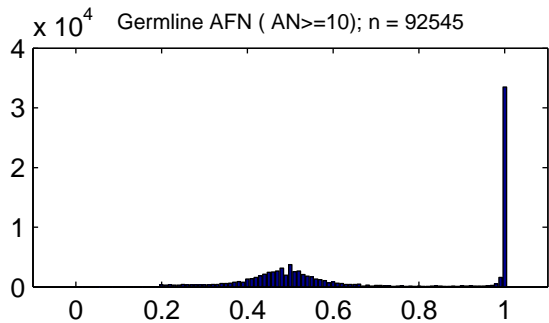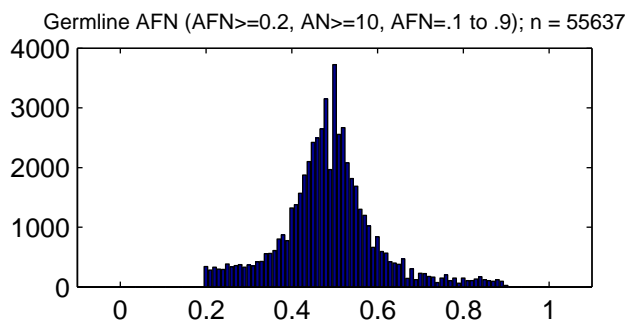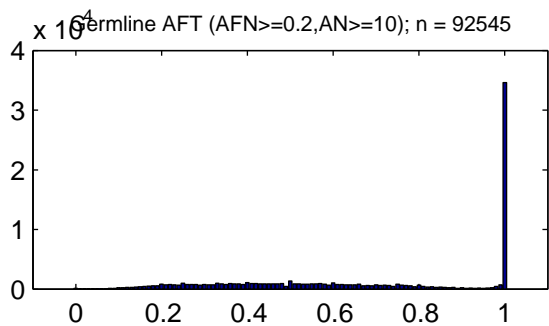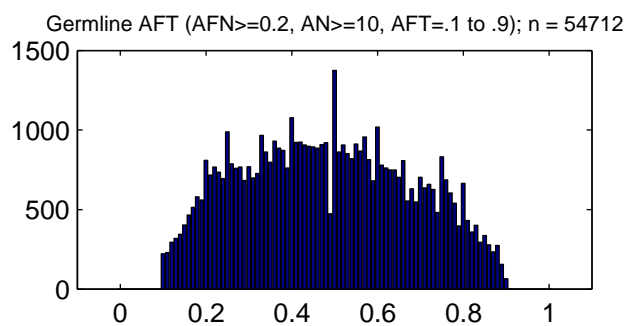



72\_ucsc.edu\_BRCA.IlluminaGA\_DNASeq.Level\_2.14.0.0 -- TCGA-AN-A0AT\_W

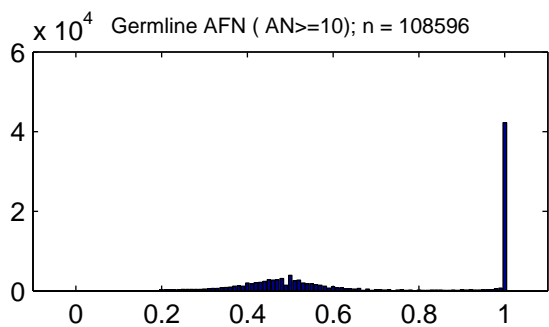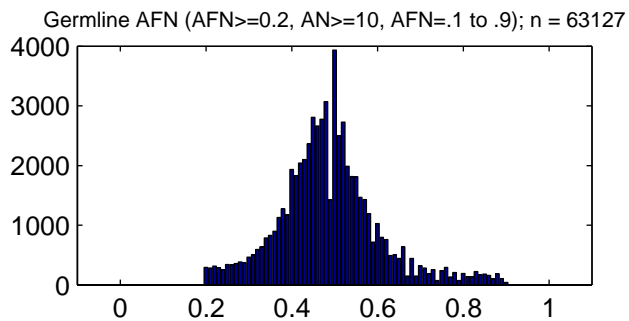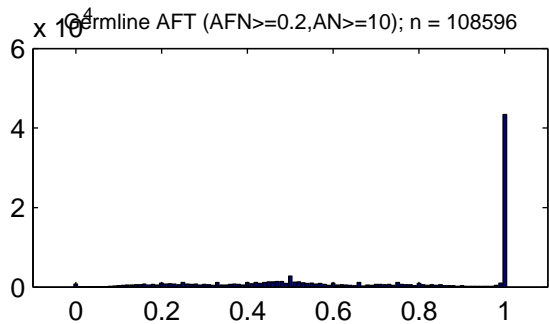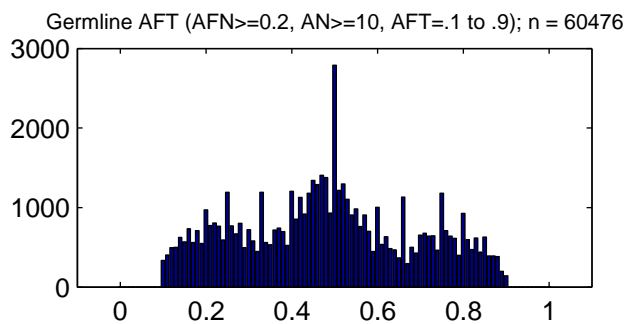

73\_ucsc.edu\_BRCA.IlluminaGA\_DNASeq.Level\_2.6.0.0 -- TCGA-AO-A0JB\_W

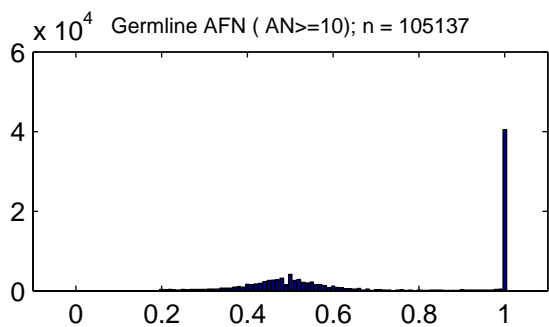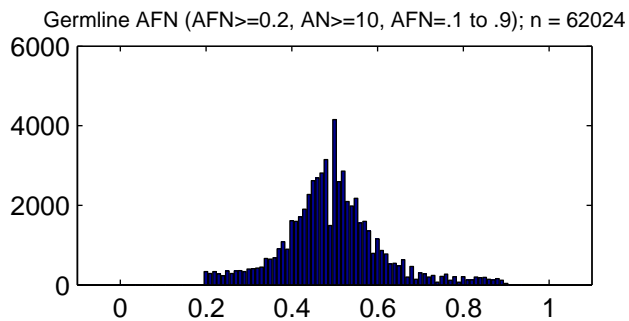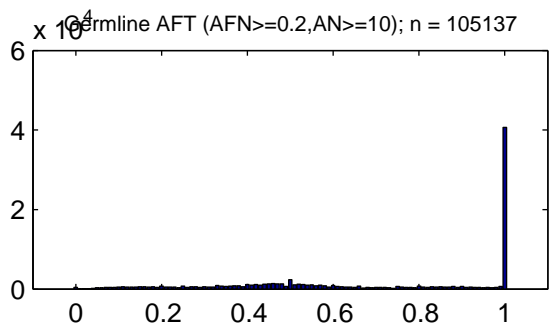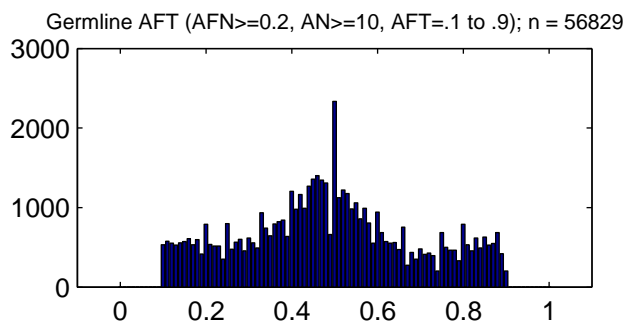

74\_ucsc.edu\_BRCA.IlluminaGA\_DNASeq.Level\_2.6.0.0 -- TCGA-AO-A03O\_W

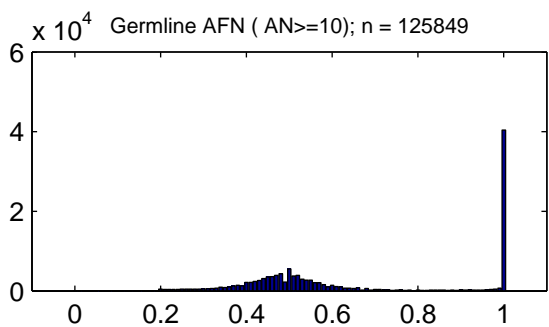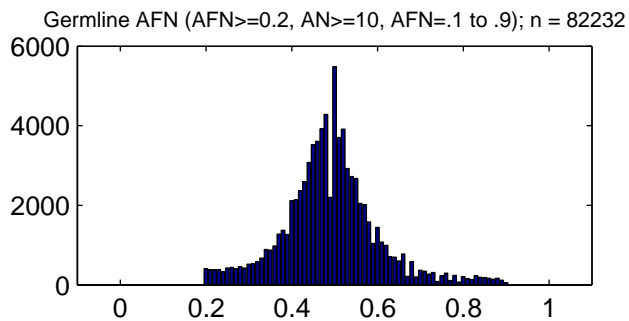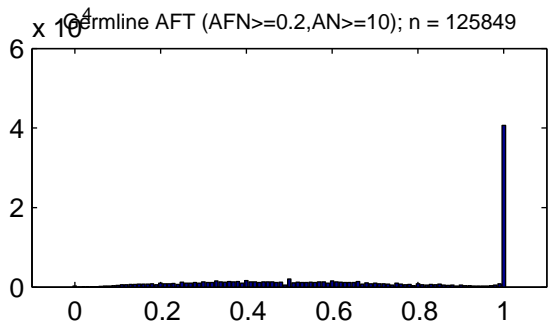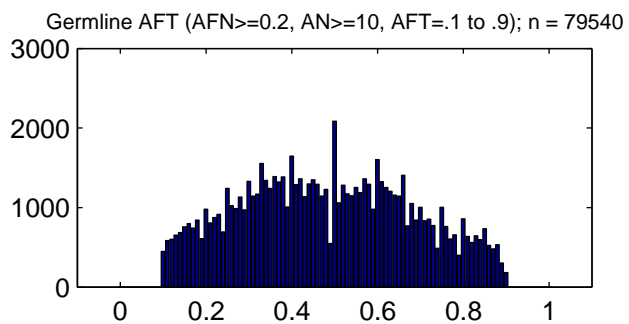

75\_ucsc.edu\_BRCA.IlluminaGA\_DNASeq.Level\_2.4.0.0 --- TCGA-A8-A07W\_W

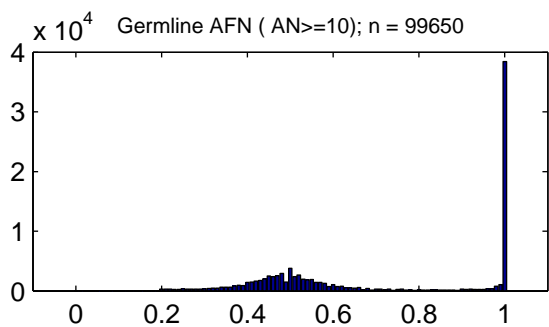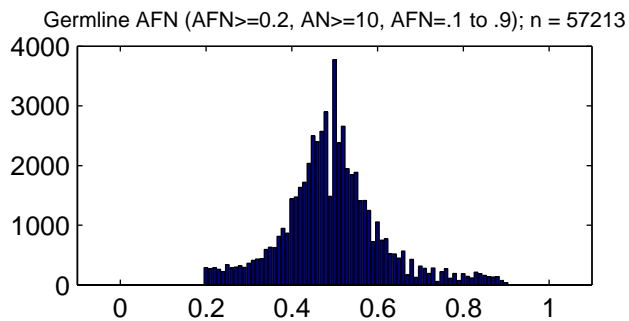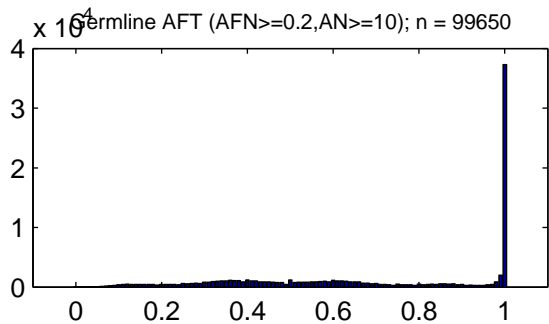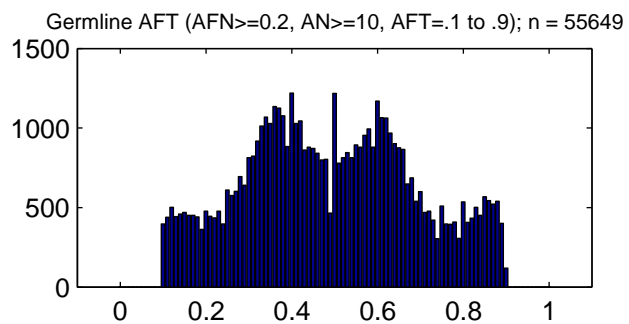

76\_ucsc.edu\_BRCA.IlluminaGA\_DNASeq.Level\_2.4.0.0 -- TCGA-A8-A08I\_W

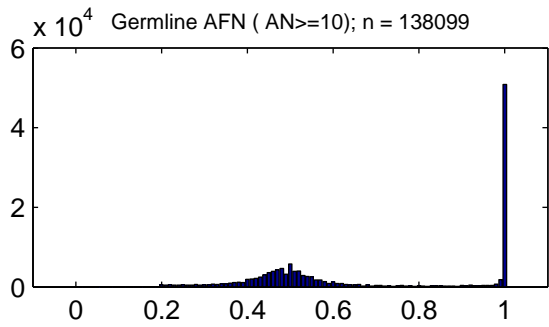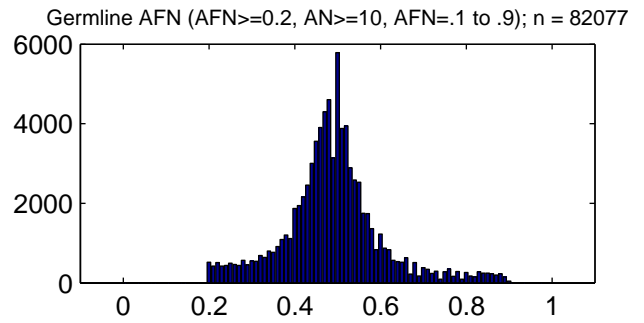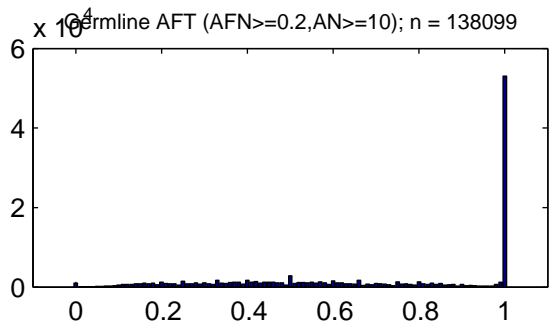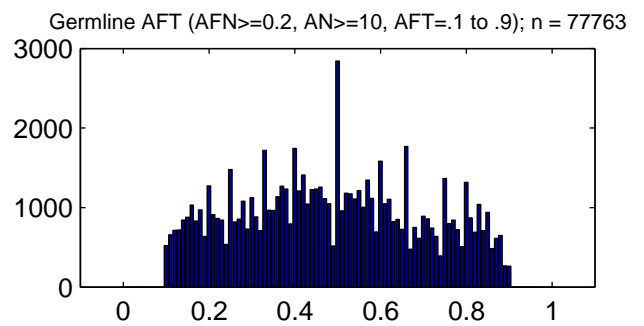

77\_ucsc.edu\_BRCA.IlluminaGA\_DNASeq.Level\_2.9.0.0 -- TCGA-B6-A0I2\_W

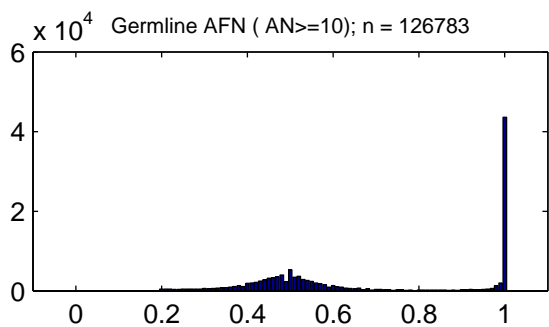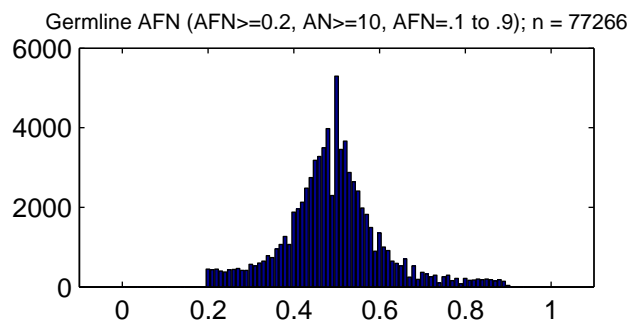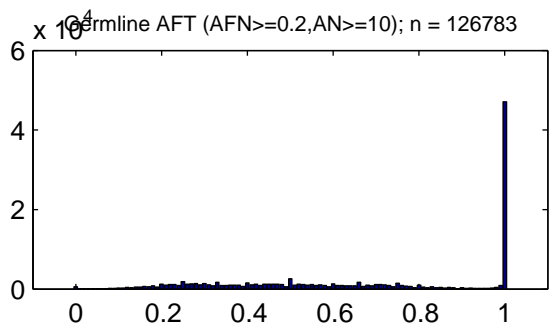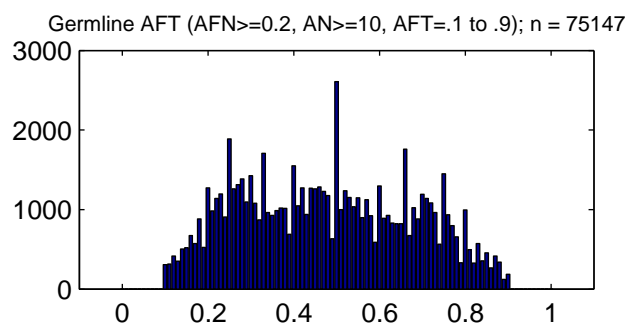

78\_ucsc.edu\_BRCA.IlluminaGA\_DNASeq.Level\_2.4.0.0 -- TCGA-A8-A06O\_W

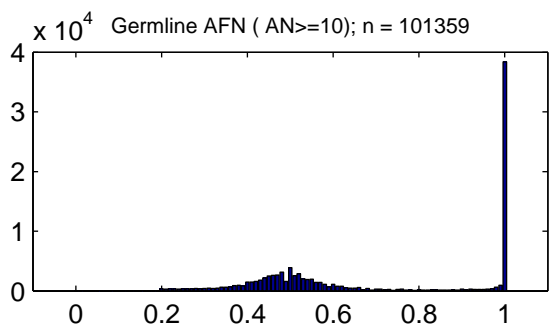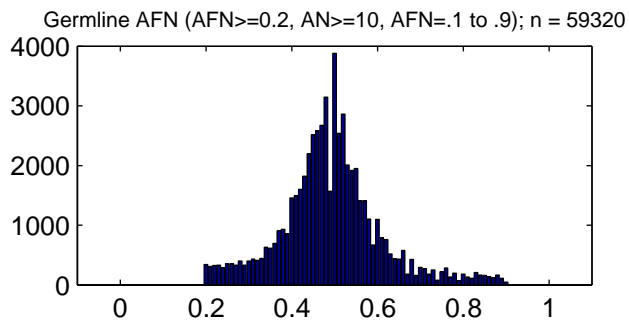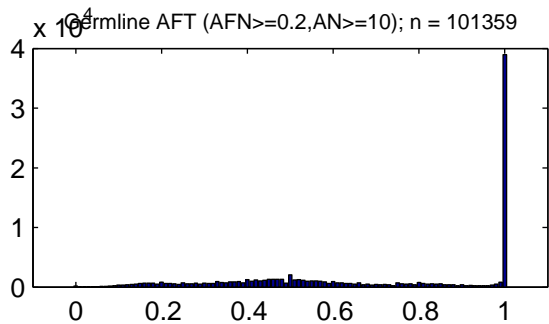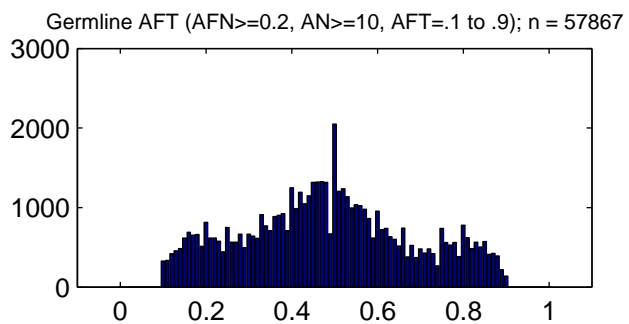

79\_ucsc.edu\_BRCA.IlluminaGA\_DNASeq.Level\_2.8.0.0 -- TCGA-AR-A0U0\_D

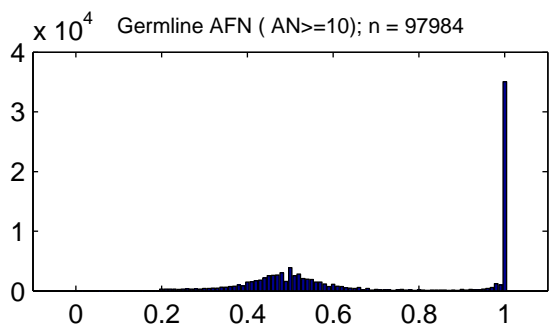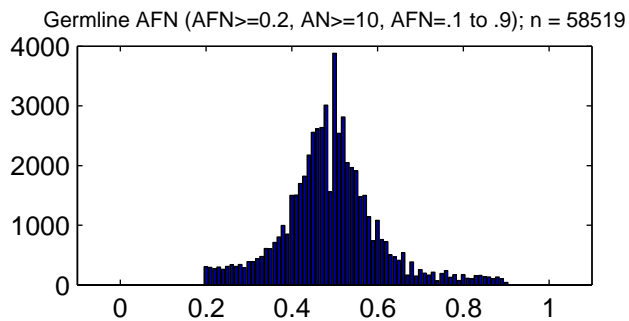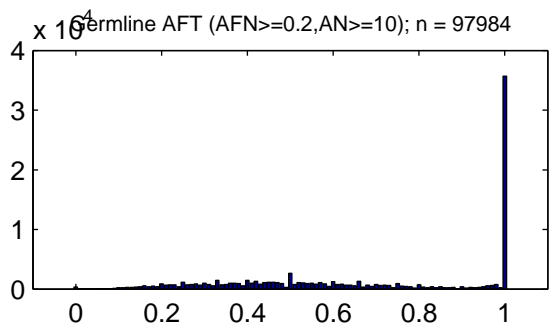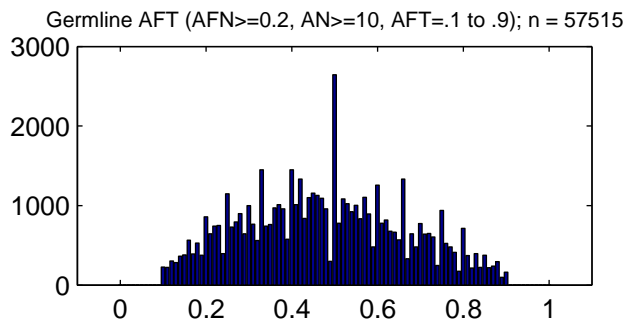



80\_ucsc.edu\_BRCA.IlluminaGA\_DNASeq.Level\_2.4.0.0 -- TCGA-A8-A075\_D

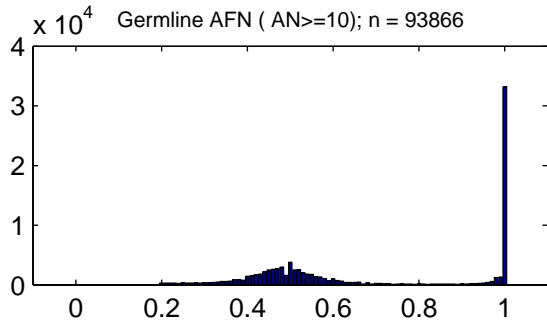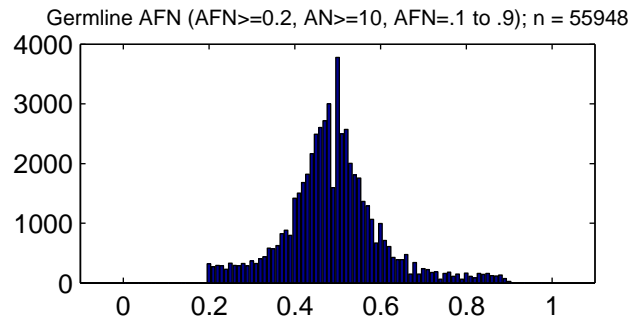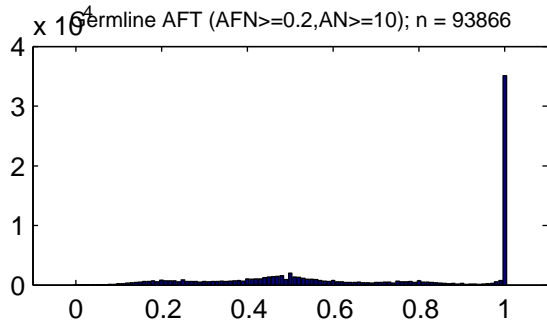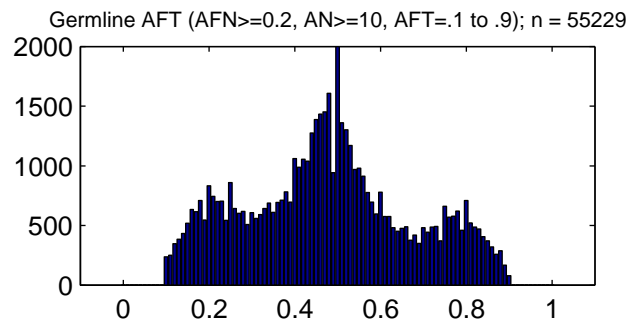

81\_ucsc.edu\_BRCA.IlluminaGA\_DNASeq.Level\_2.2.0.0 -- TCGA-A2-A0T3\_D

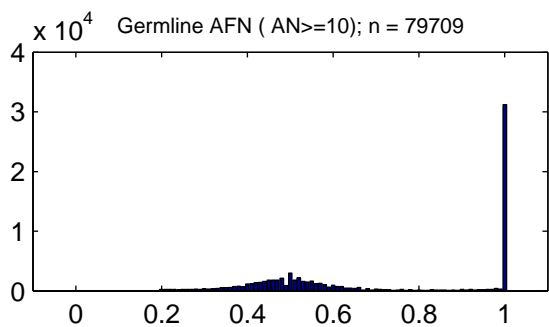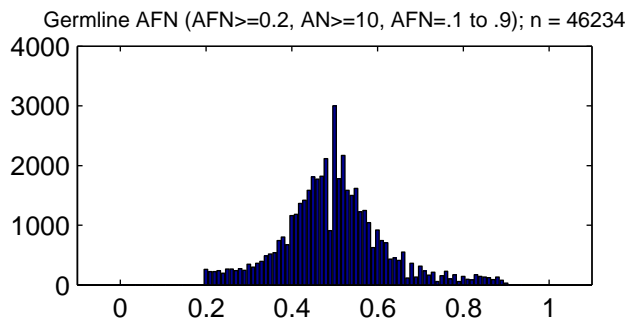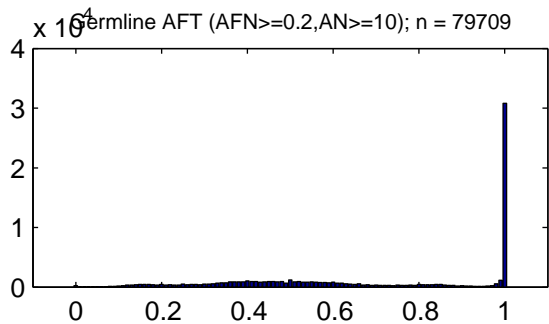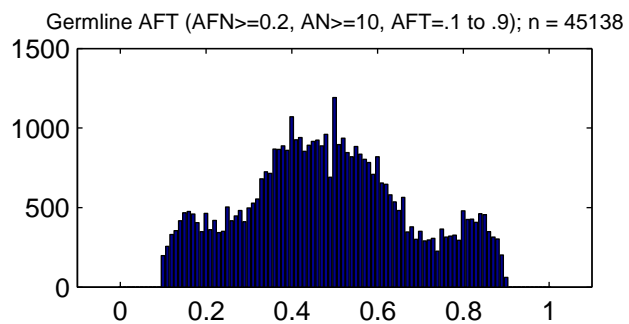

82\_ucsc.edu\_BRCA.IlluminaGA\_DNASeq.Level\_2.14.0.0 -- TCGA-B6-A0RS\_W

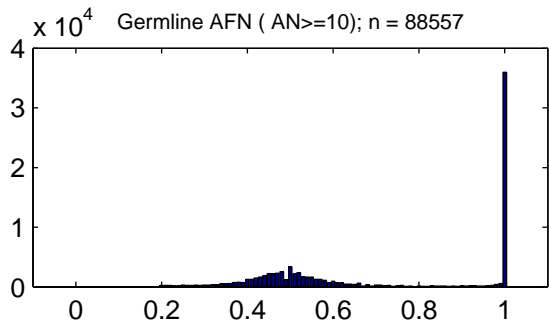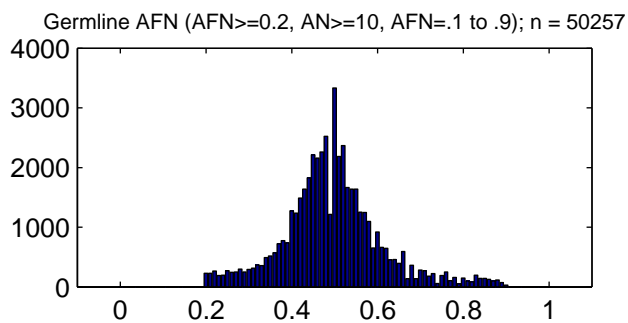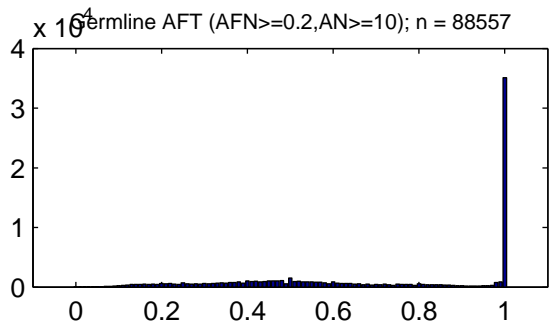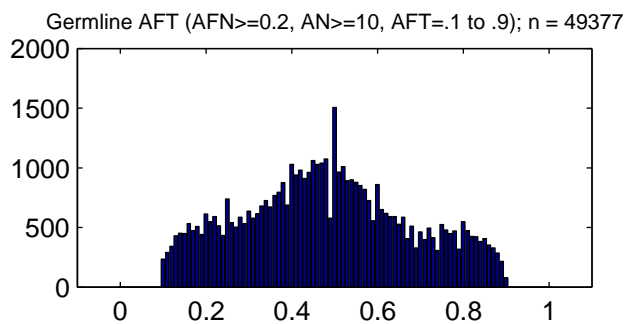

83\_ucsc.edu\_BRCA.IlluminaGA\_DNASeq.Level\_2.2.0.0 -- TCGA-A2-A0YJ\_D

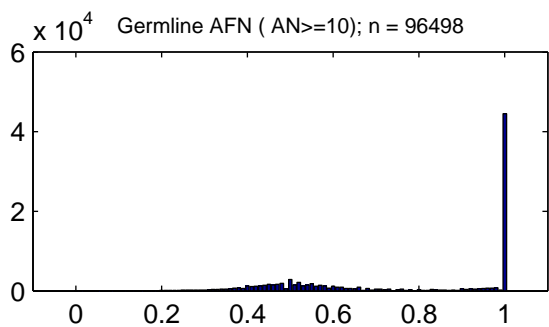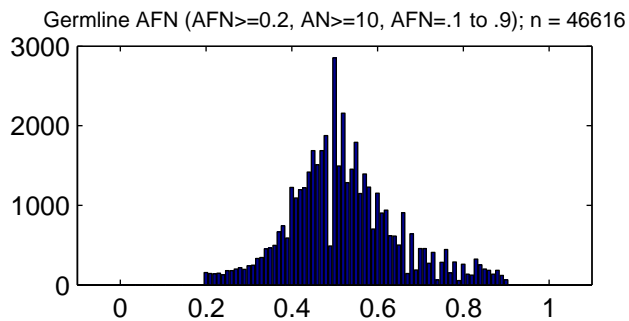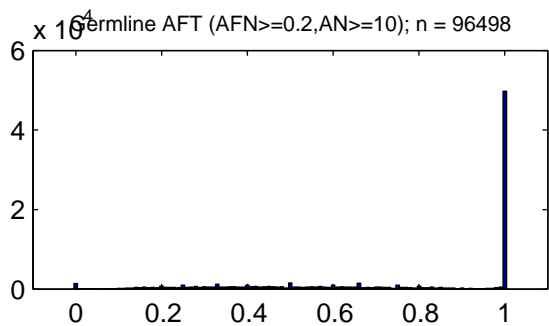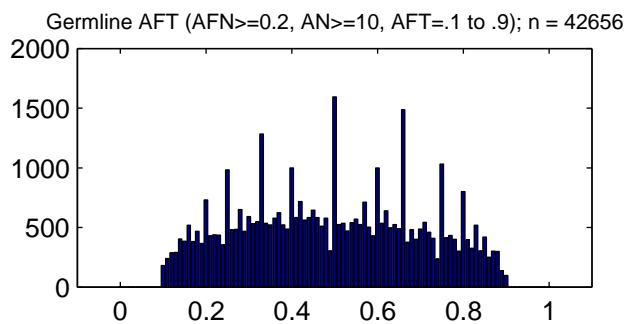

84\_ucsc.edu\_BRCA.IlluminaGA\_DNASeq.Level\_2.4.0.0 -- TCGA-A8-A06Z\_W

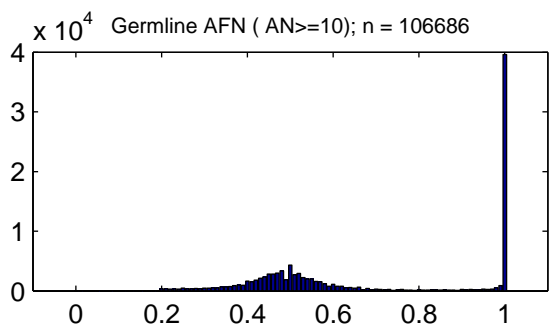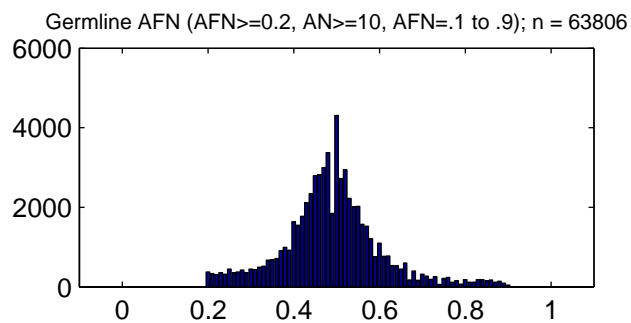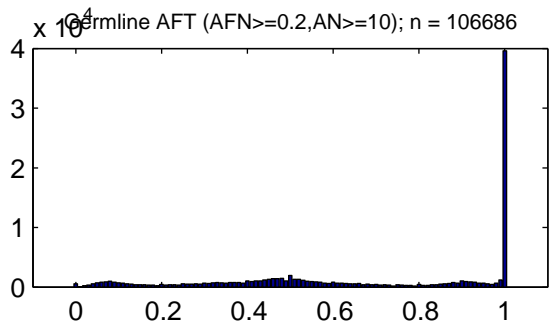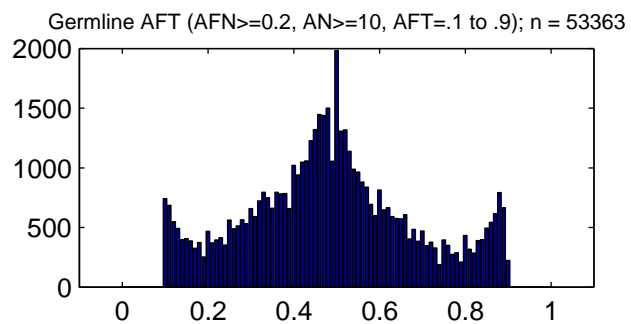

85\_ucsc.edu\_BRCA.IlluminaGA\_DNASeq.Level\_2.5.0.0 -- TCGA-AN-A0AL\_W

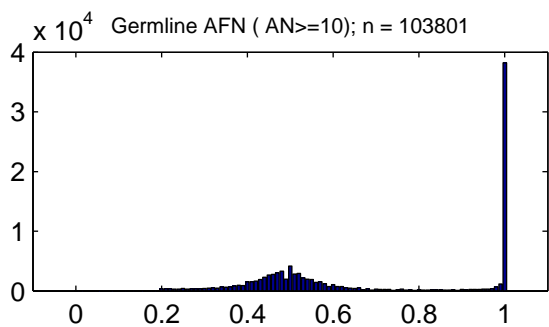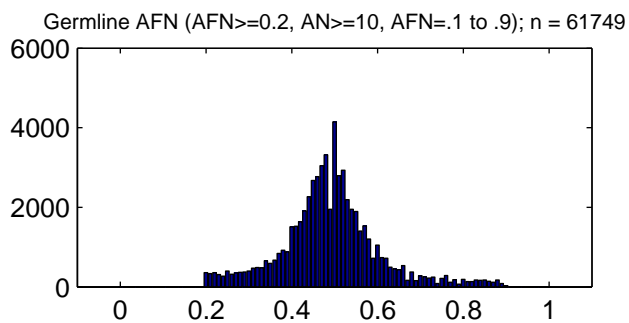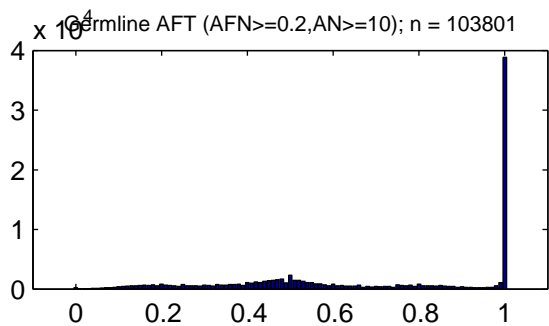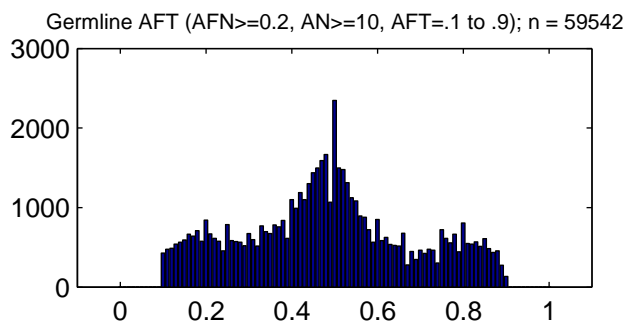

86\_ucsc.edu\_BRCA.IlluminaGA\_DNASeq.Level\_2.10.0.0 -- TCGA-BH-A0HX\_W

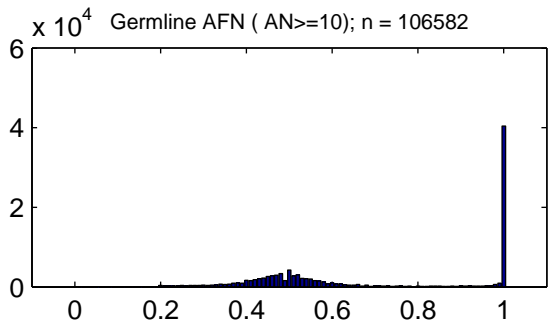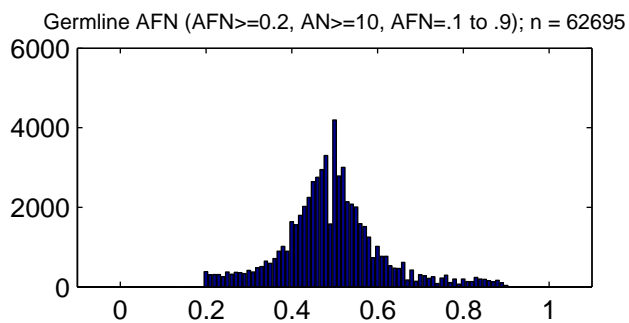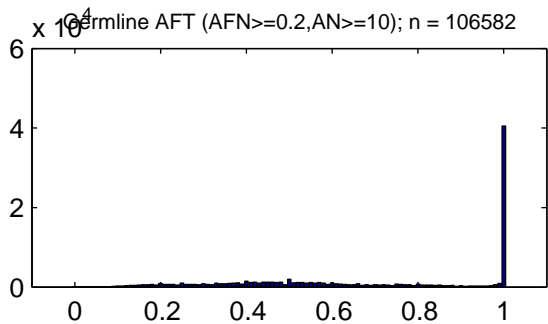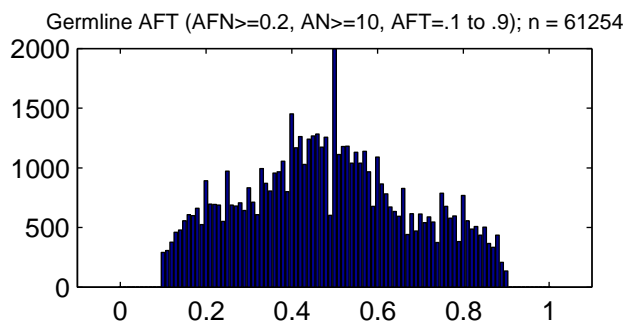

87\_ucsc.edu\_BRCA.IlluminaGA\_DNASeq.Level\_2.4.0.0 -- TCGA-A8-A09Q\_W

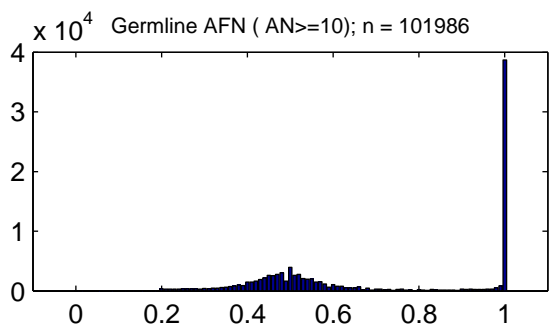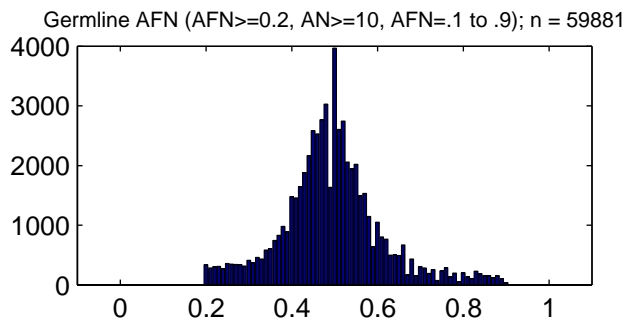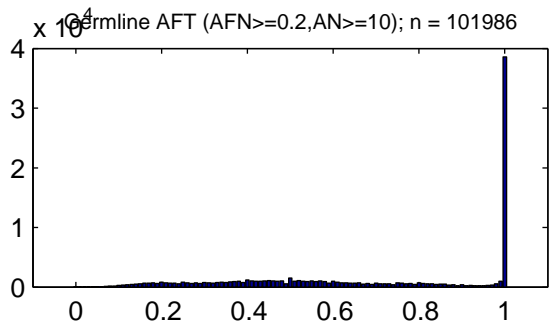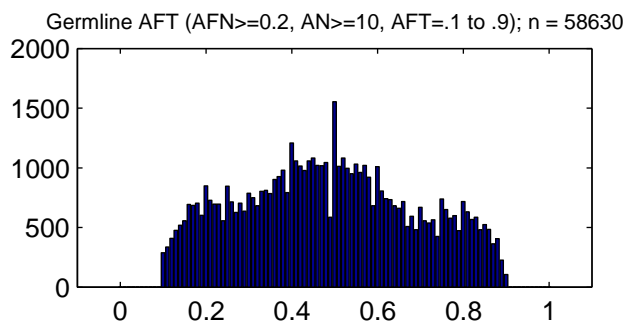



88\_ucsc.edu\_BRCA.IlluminaGA\_DNASeq.Level\_2.5.0.0 -- TCGA-AN-A0FW\_W

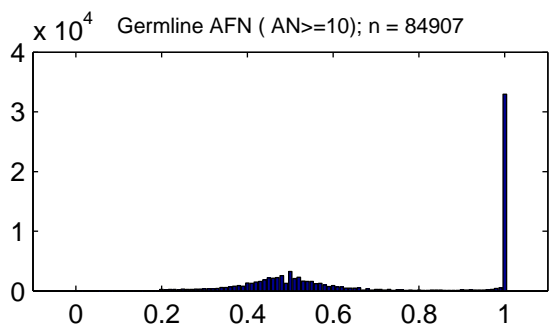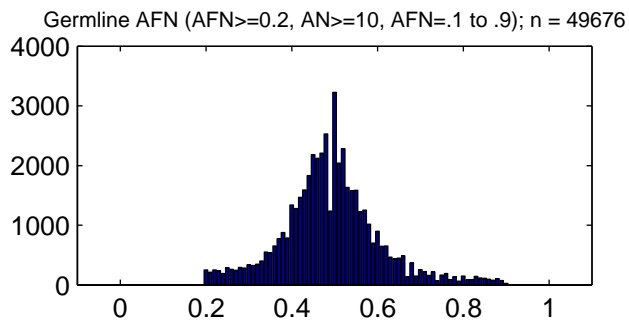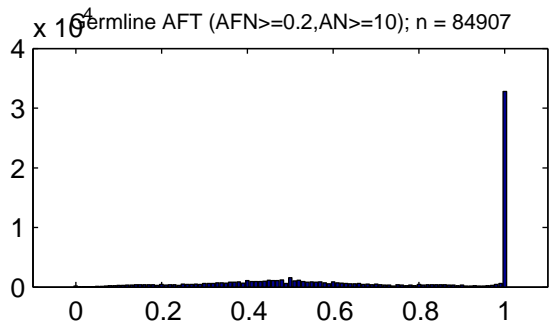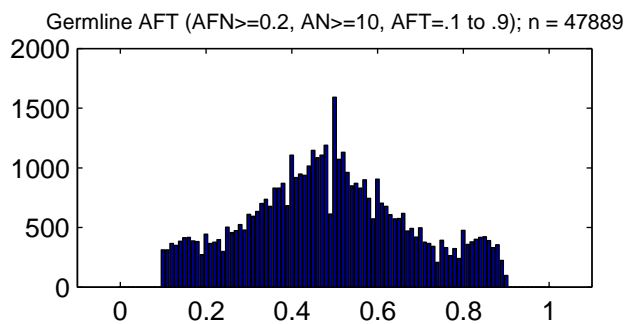

89\_ucsc.edu\_BRCA.IlluminaGA\_DNASeq.Level\_2.5.0.0 -- TCGA-AN-A03Y\_W

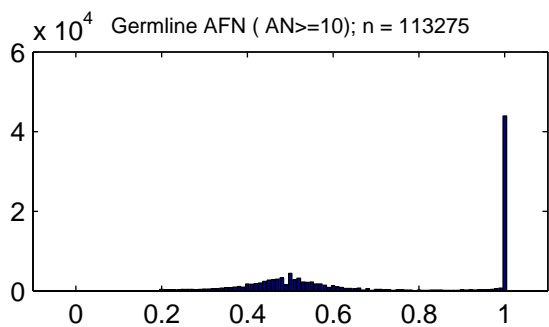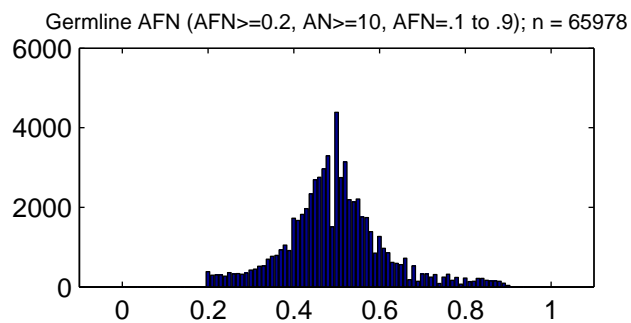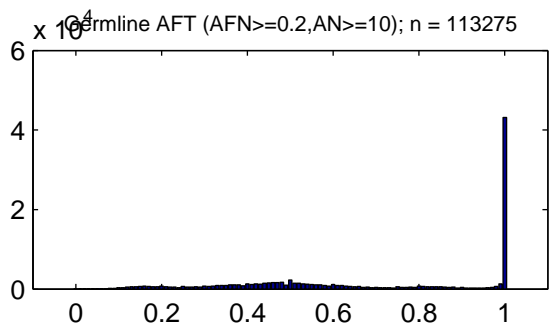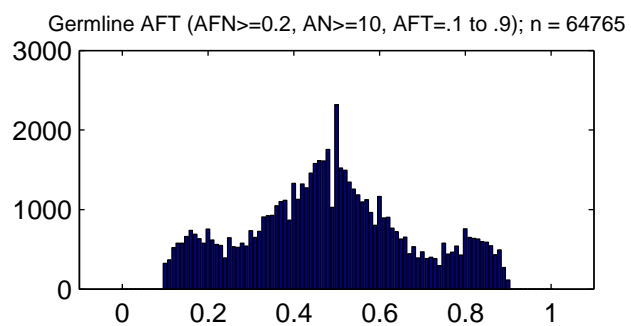

90\_ucsc.edu\_BRCA.IlluminaGA\_DNASeq.Level\_2.12.0.0 -- TCGA-D8-A142\_D

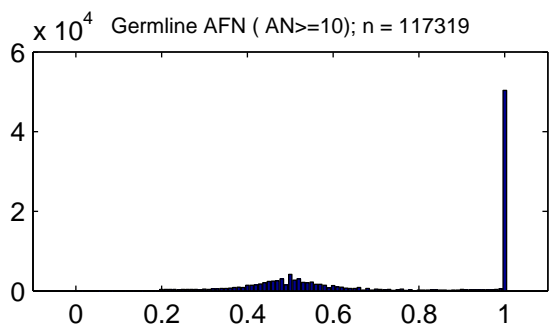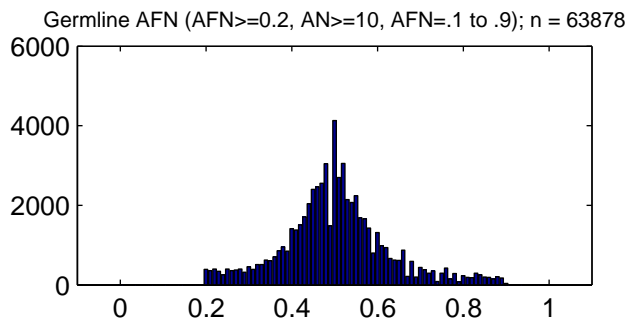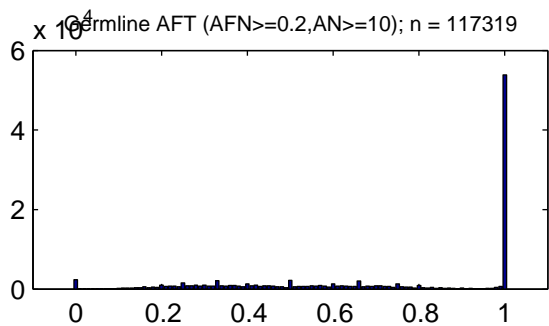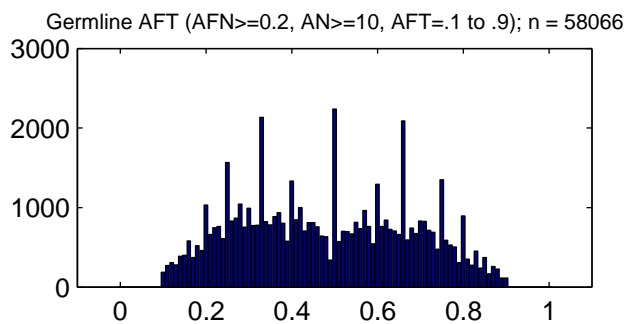

91\_ucsc.edu\_BRCA.IlluminaGA\_DNASeq.Level\_2.13.0.0 -- TCGA-E2-A109\_D

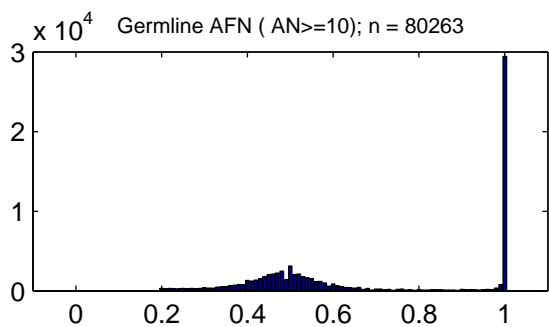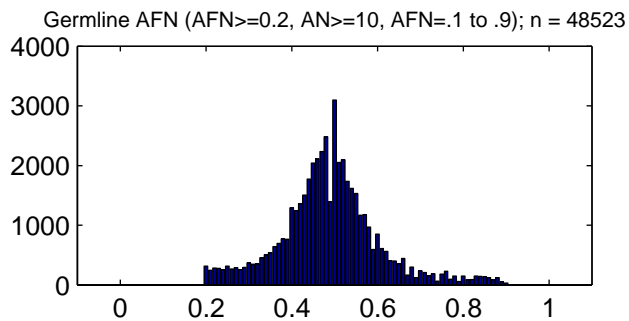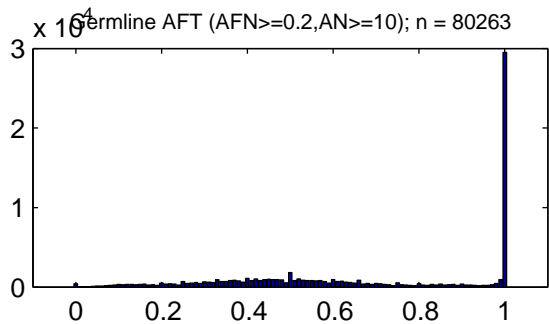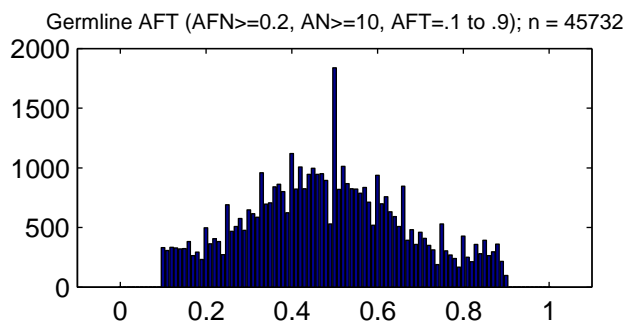

92\_ucsc.edu\_BRCA.IlluminaGA\_DNASeq.Level\_2.10.0.0 -- TCGA-BH-A0H7\_W

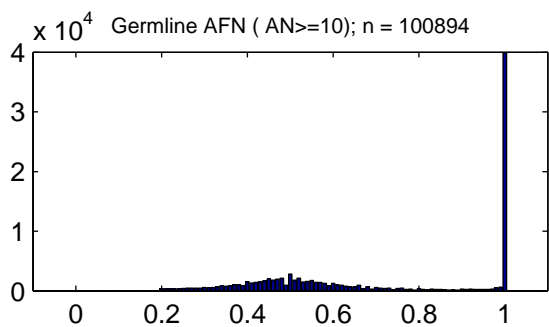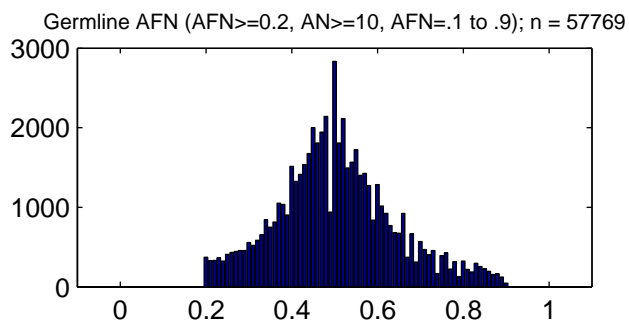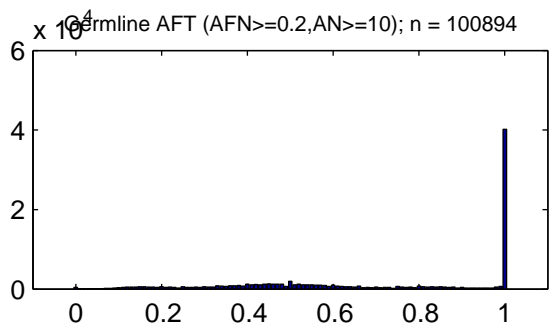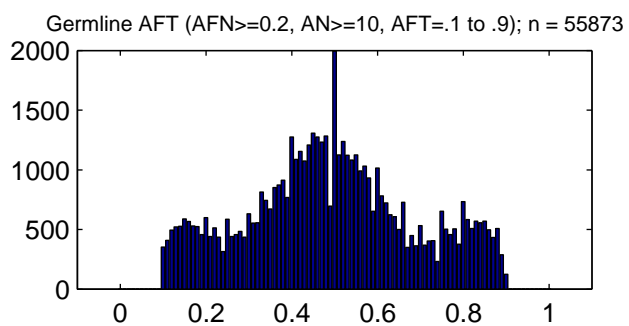

93\_ucsc.edu\_BRCA.IlluminaGA\_DNASeq.Level\_2.14.0.0 -- TCGA-AN-A04C\_W

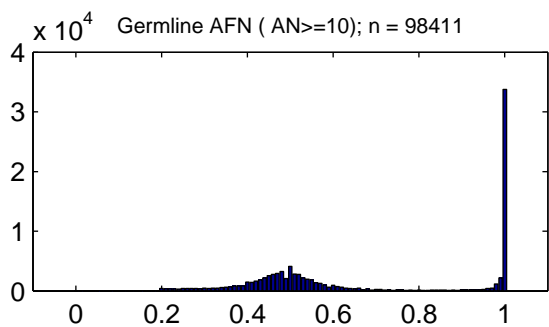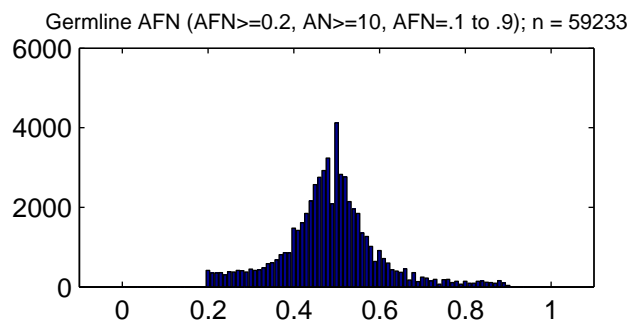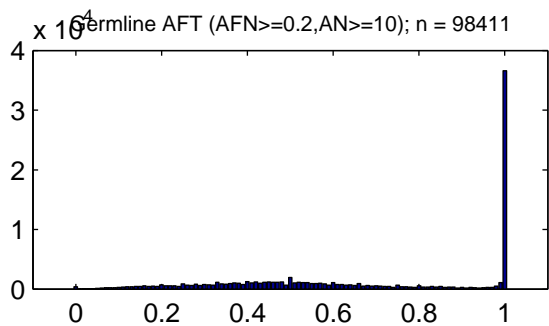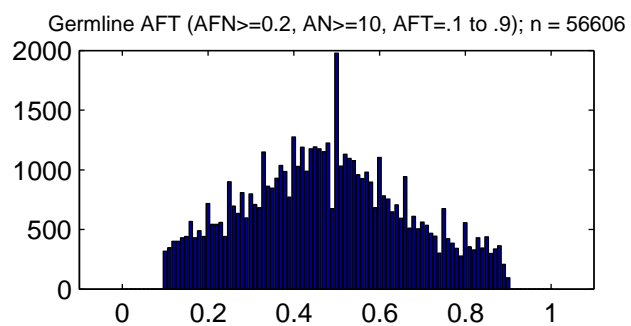

94\_ucsc.edu\_BRCA.IlluminaGA\_DNASeq.Level\_2.13.0.0 -- TCGA-E2-A15A\_D

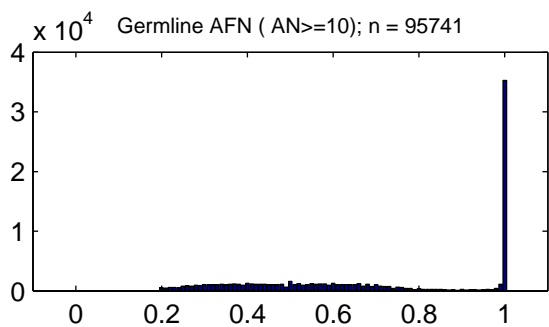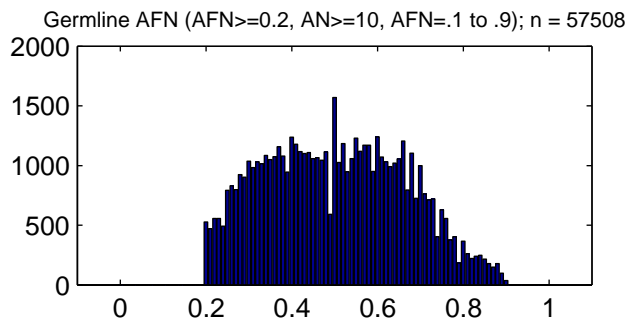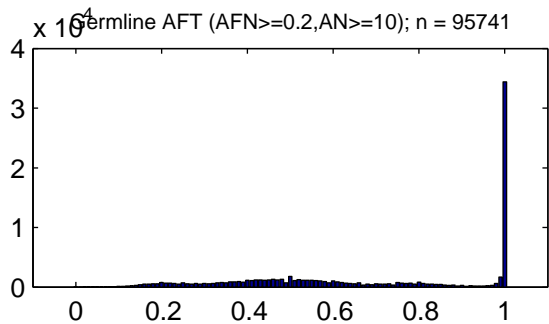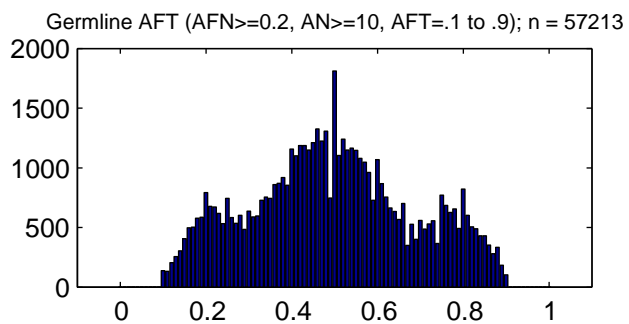

95\_ucsc.edu\_BRCA.IlluminaGA\_DNASeq.Level\_2.8.0.0 -- TCGA-AR-A1AP\_D

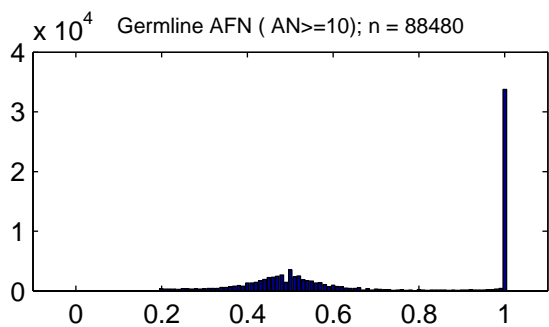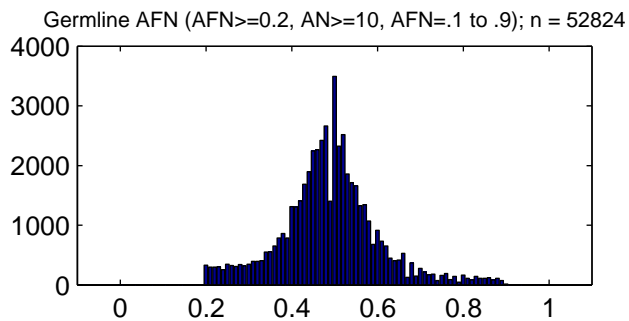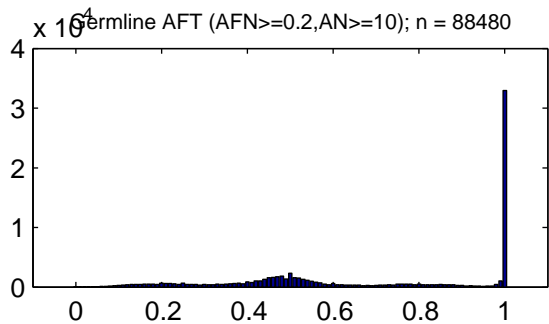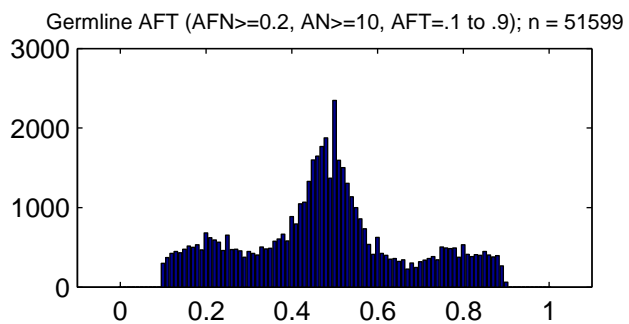



96\_ucsc.edu\_BRCA.IlluminaGA\_DNASeq.Level\_2.10.0.0 --- TCGA-BH-A18L\_D

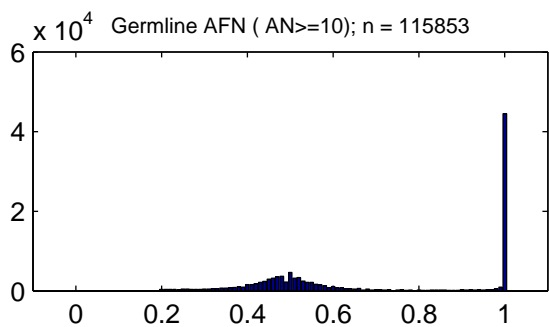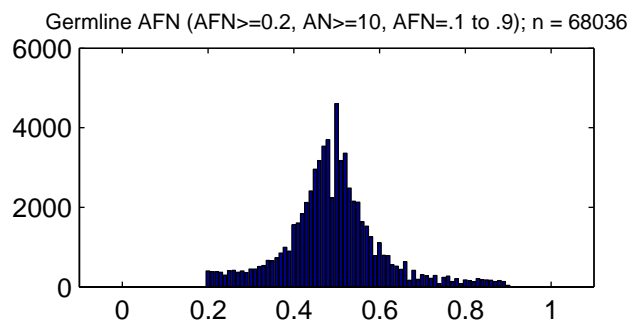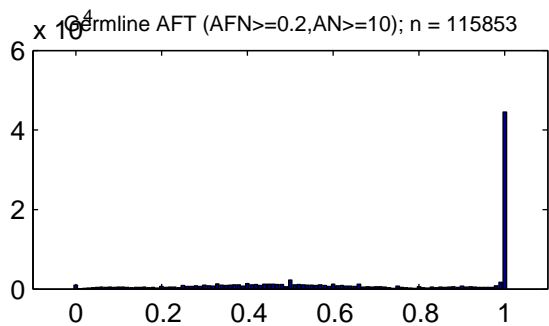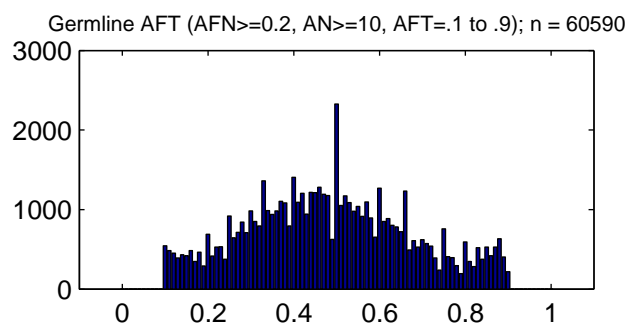

97\_ucsc.edu\_BRCA.IlluminaGA\_DNASeq.Level\_2.4.0.0 -- TCGA-A8-A09N\_W

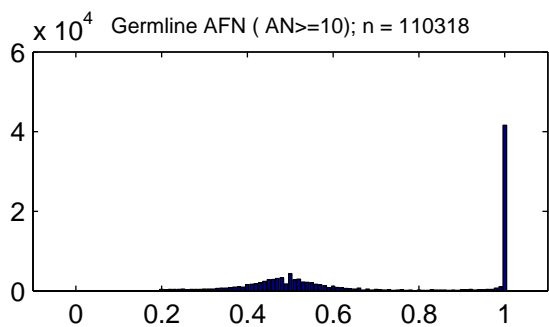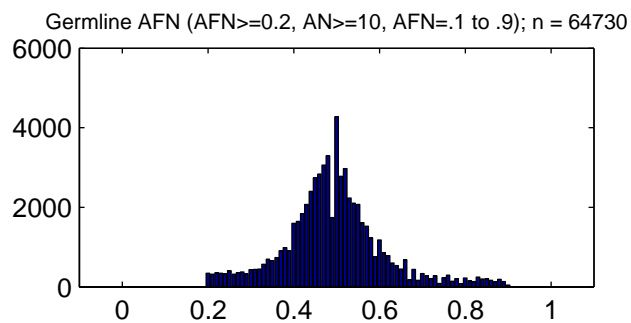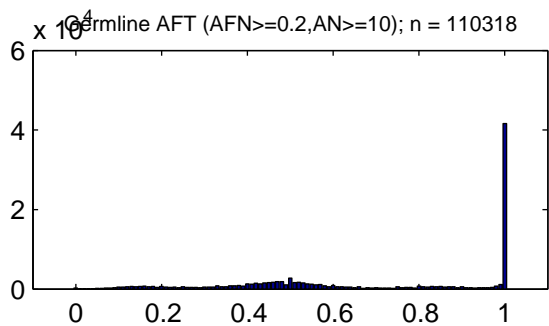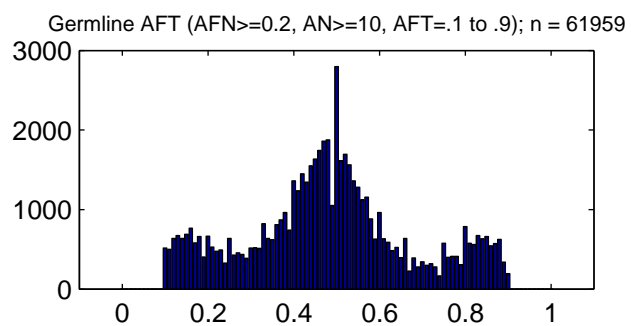

98\_ucsc.edu\_BRCA.IlluminaGA\_DNASeq.Level\_2.2.0.0 -- TCGA-A2-A0EY\_W

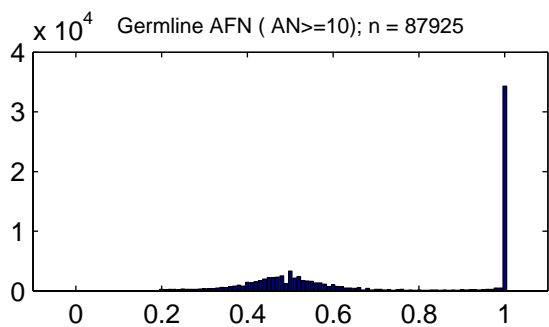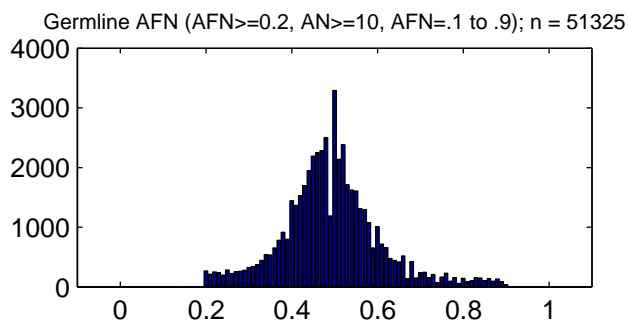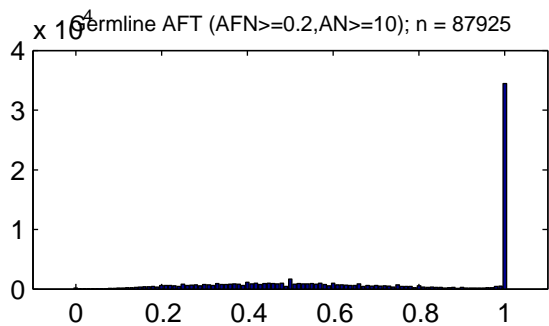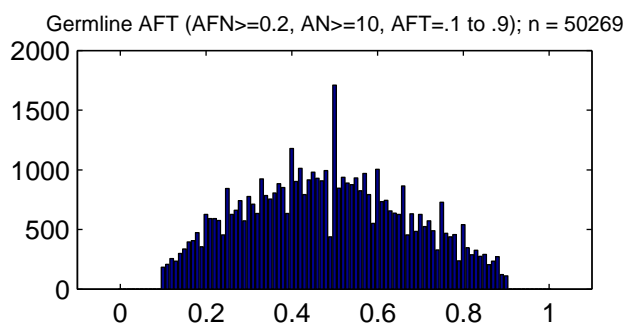

99\_ucsc.edu\_BRCA.IlluminaGA\_DNASeq.Level\_2.10.0.0 -- TCGA-BH-A0BT\_D

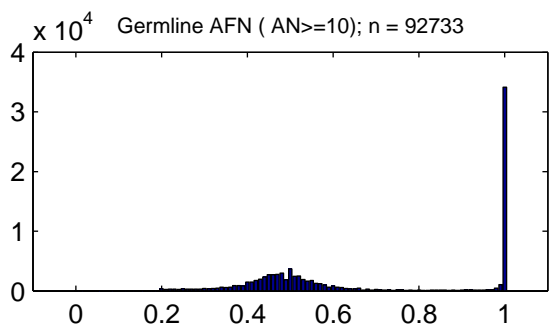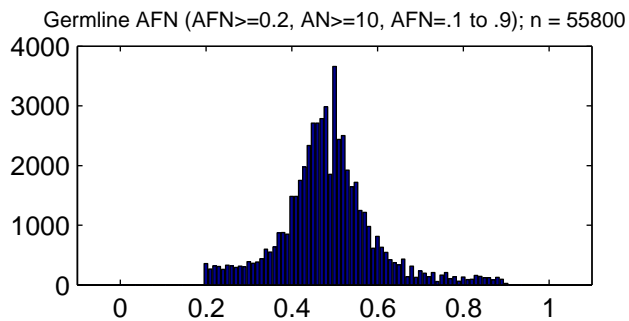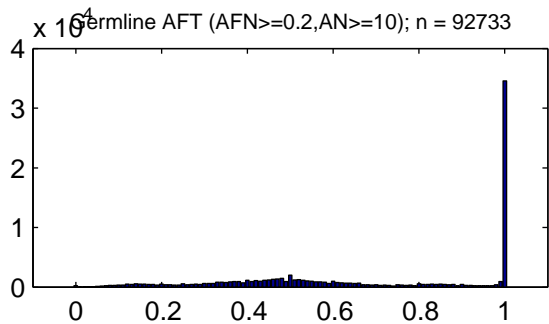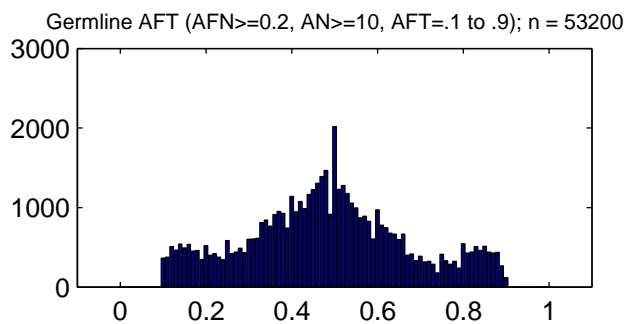

100\_ucsc.edu\_BRCA.IlluminaGA\_DNASeq.Level\_2.4.0.0 -- TCGA-A8-A08F\_W

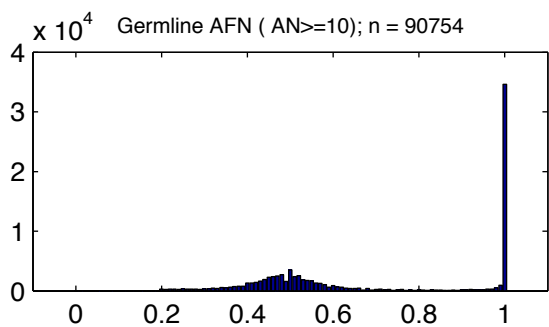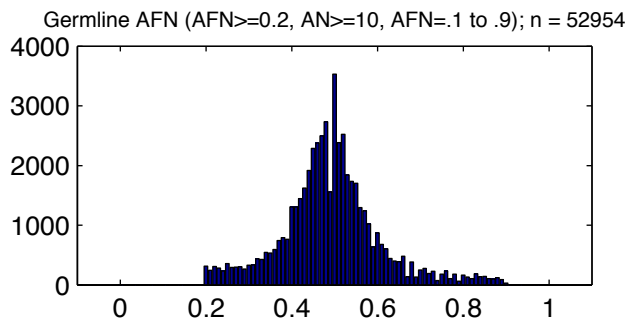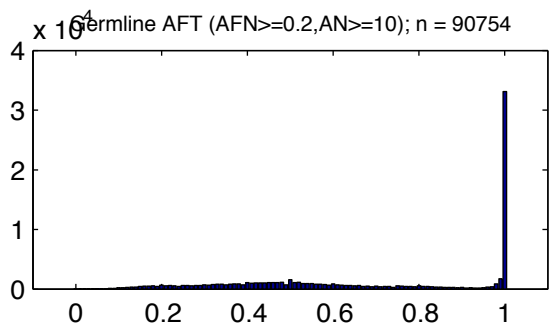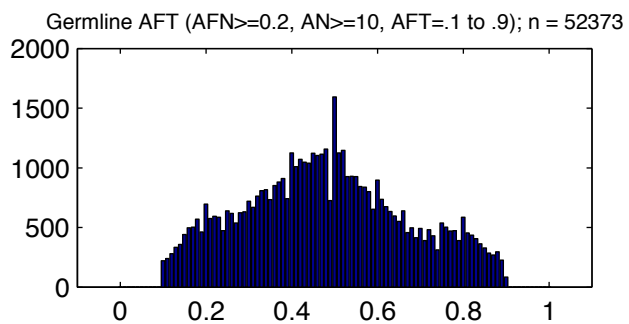

101\_ucsc.edu\_BRCA.IlluminaGA\_DNASeq.Level\_2.5.0.0 -- TCGA-AN-A0FZ\_W

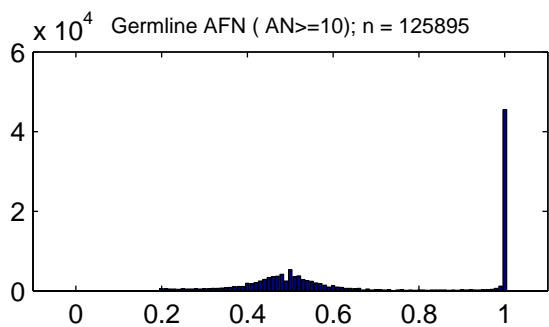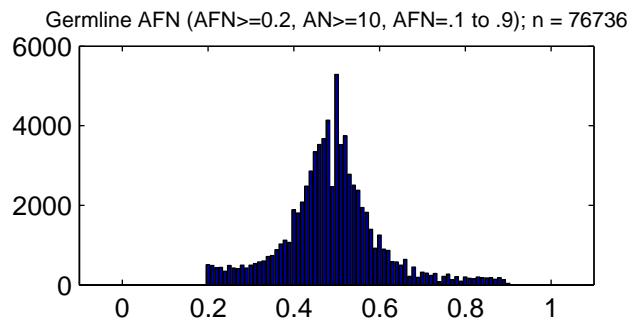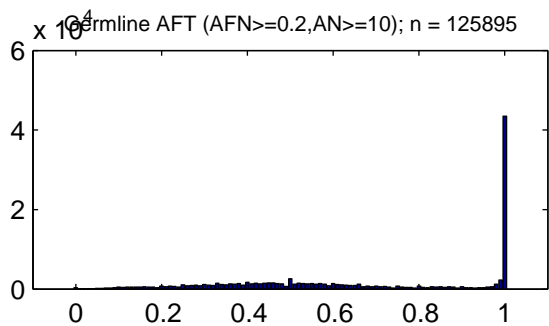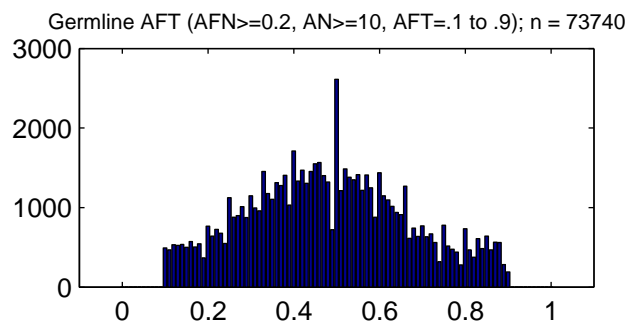

102\_ucsc.edu\_BRCA.IlluminaGA\_DNASeq.Level\_2.8.0.0 -- TCGA-AR-A1AQ\_D

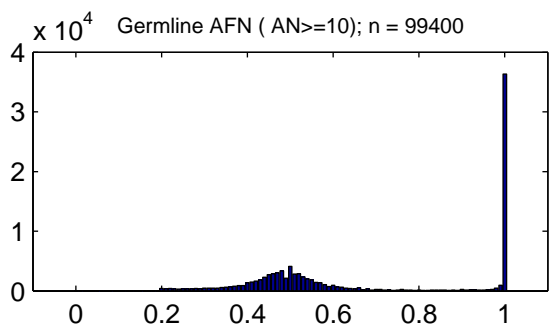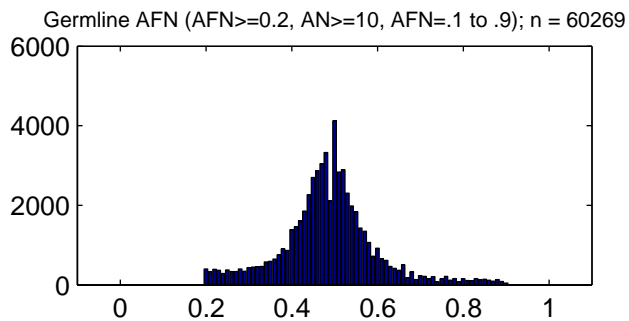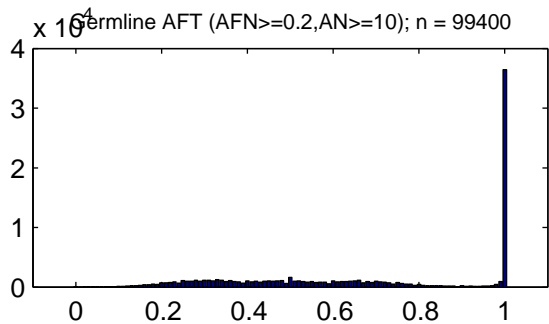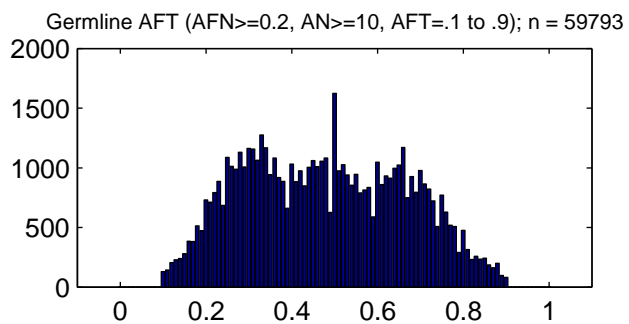

103\_ucsc.edu\_BRCA.IlluminaGA\_DNASeq.Level\_2.2.0.0 -- TCGA-A2-A0SX\_D

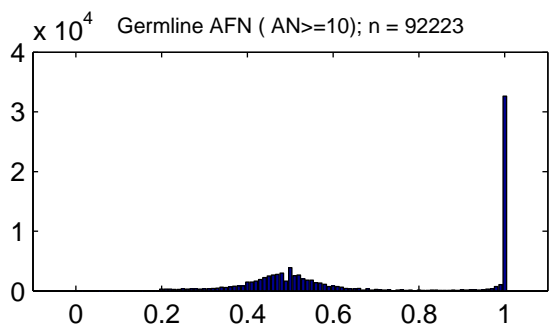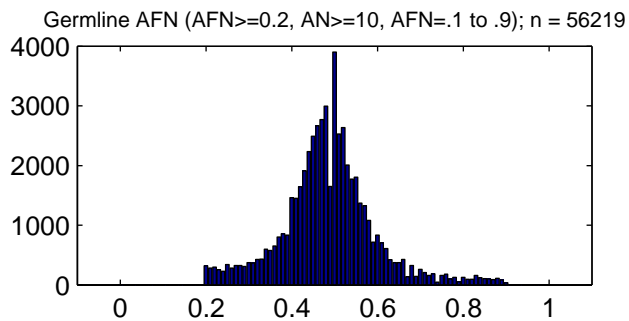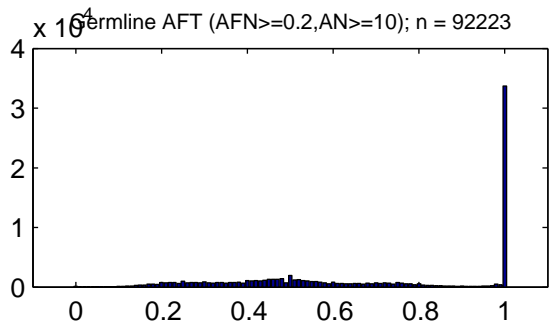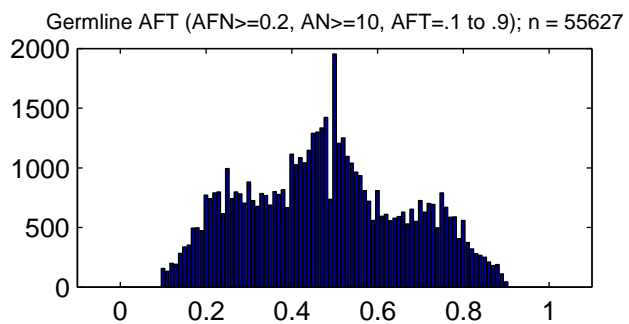



104\_ucsc.edu\_BRCA.IlluminaGA\_DNASeq.Level\_2.5.0.0 -- TCGA-AN-A0AJ\_W

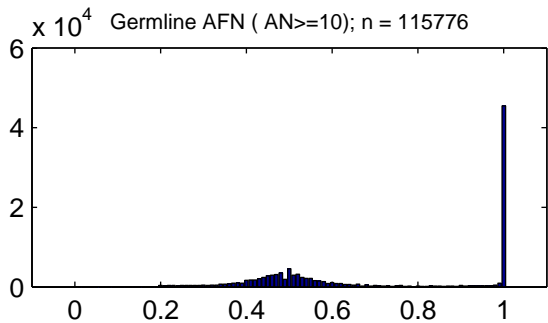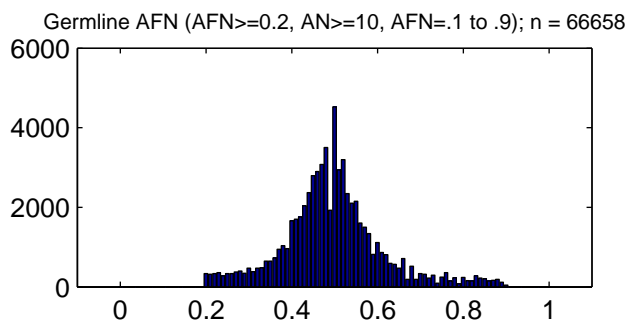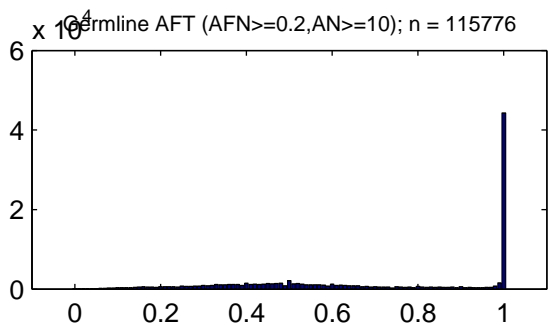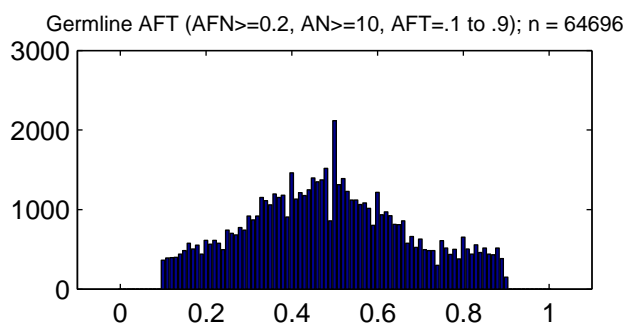

105\_ucsc.edu\_BRCA.IlluminaGA\_DNASeq.Level\_2.10.0.0 -- TCGA-BH-A0HU\_V

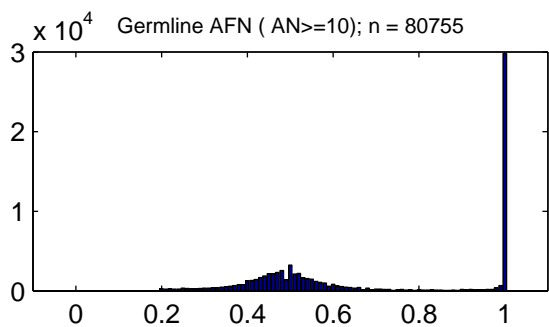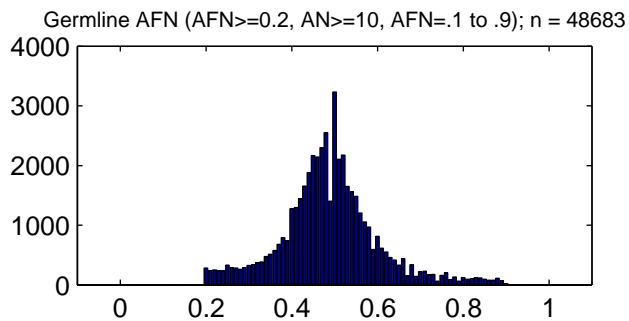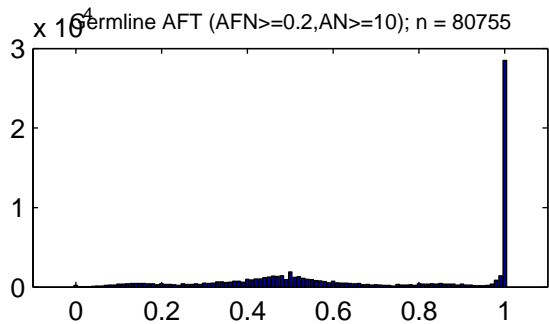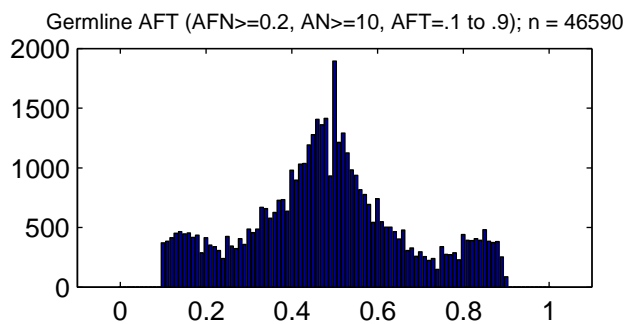

106\_ucsc.edu\_BRCA.IlluminaGA\_DNASeq.Level\_2.11.0.0 -- TCGA-C8-A12M\_C

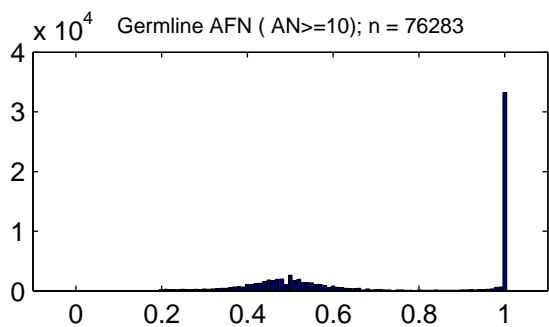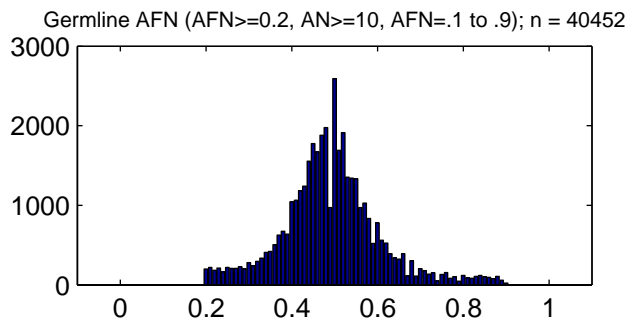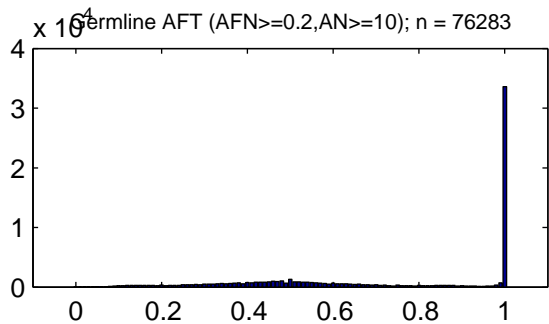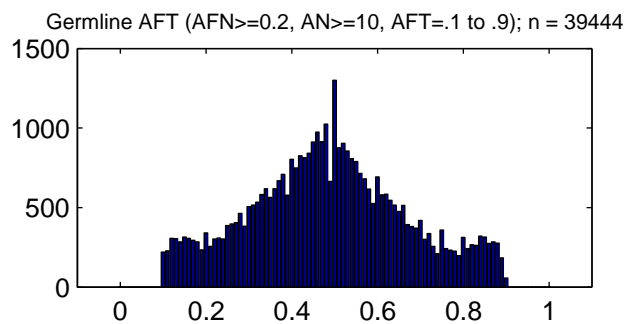

107\_ucsc.edu\_BRCA.IlluminaGA\_DNASeq.Level\_2.10.0.0 -- TCGA-BH-A0B3\_V

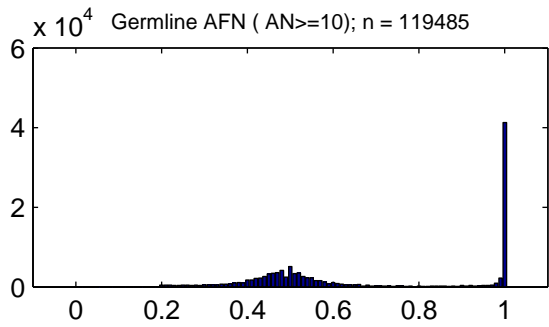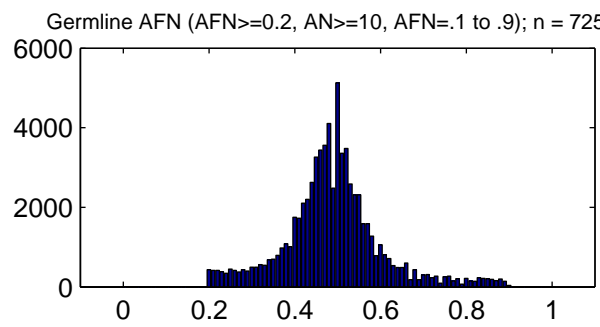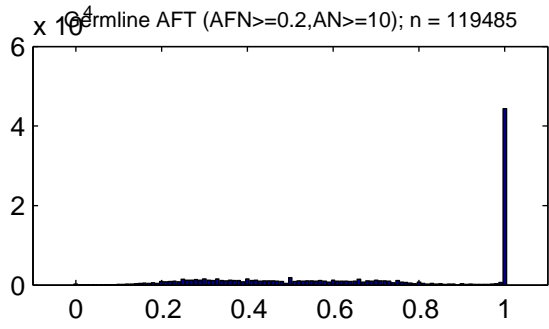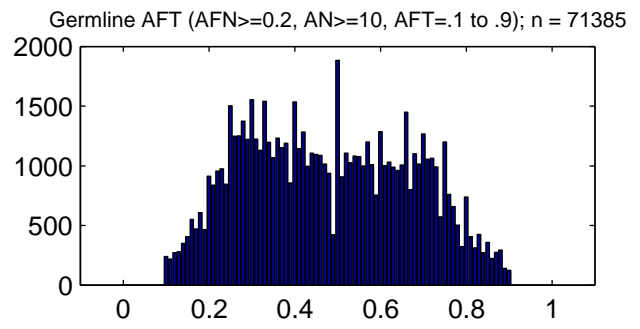

108\_ucsc.edu\_BRCA.IlluminaGA\_DNASeq.Level\_2.14.0.0 -- TCGA-A2-A0SW\_V

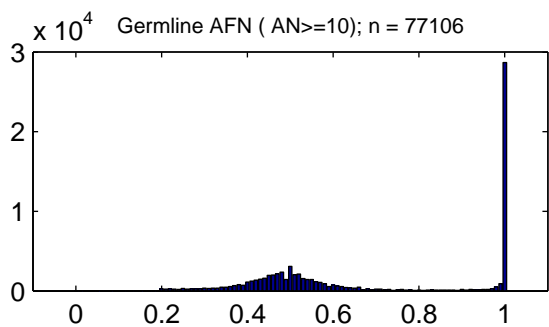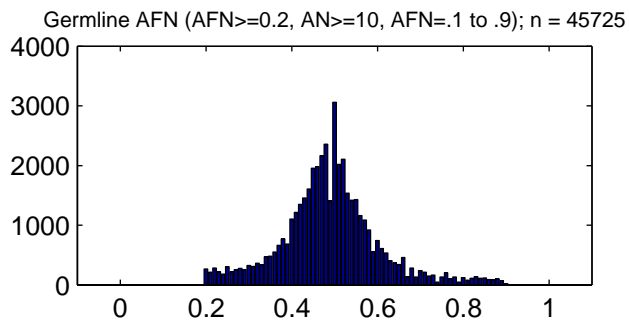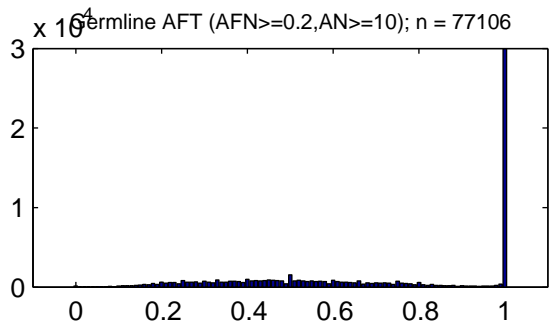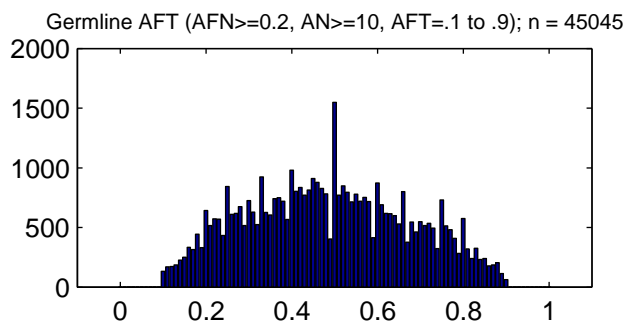

109\_ucsc.edu\_BRCA.IlluminaGA\_DNASeq.Level\_2.4.0.0 -- TCGA-A8-A079\_W

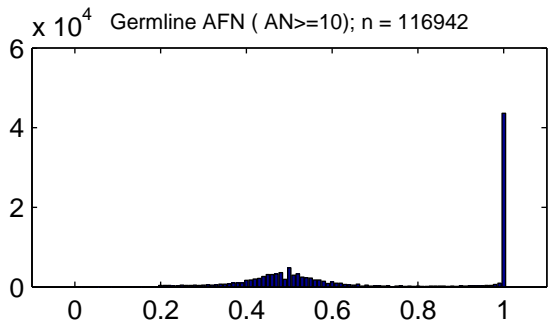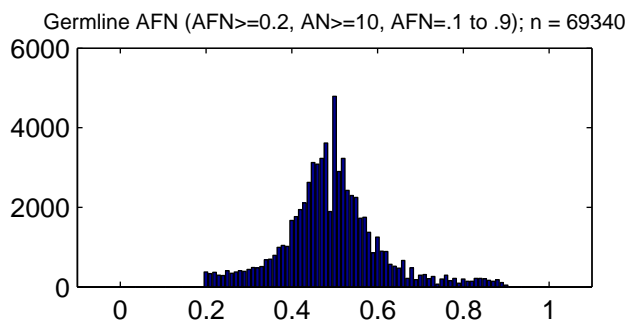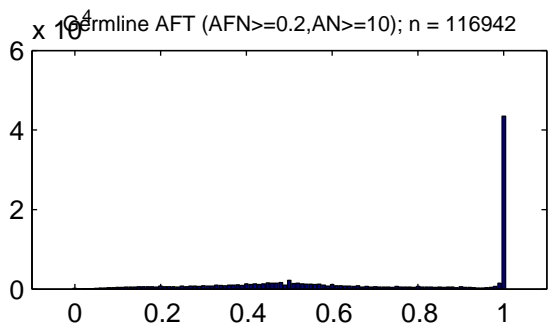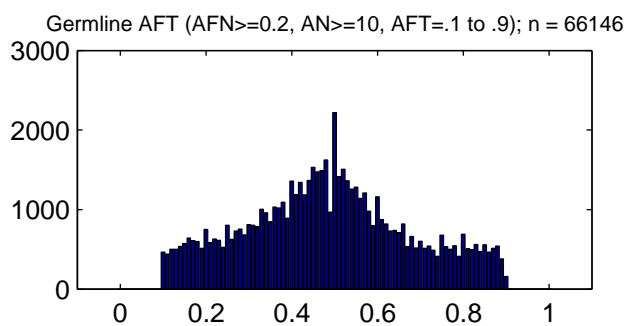

110\_ucsc.edu\_BRCA.IlluminaGA\_DNASeq.Level\_2.4.0.0 -- TCGA-A8-A08S\_W

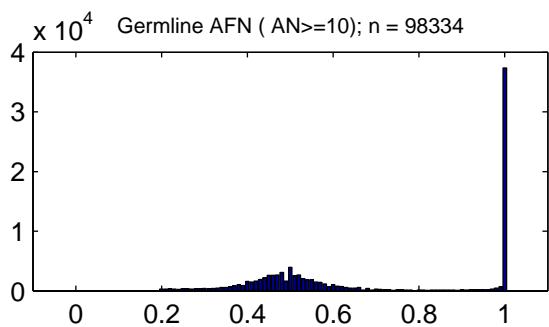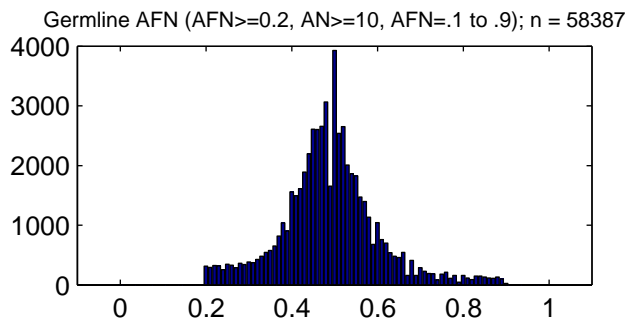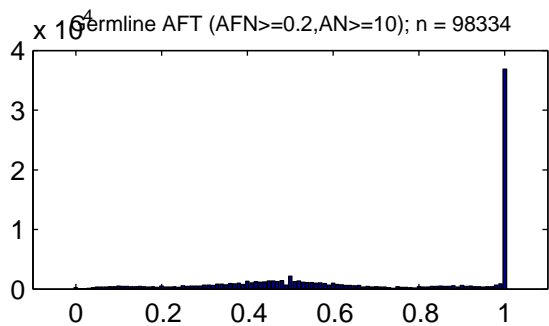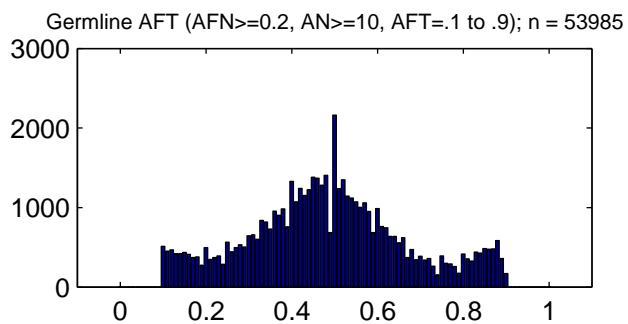

111\_ucsc.edu\_BRCA.IlluminaGA\_DNASeq.Level\_2.13.0.0 -- TCGA-E2-A1AZ\_C

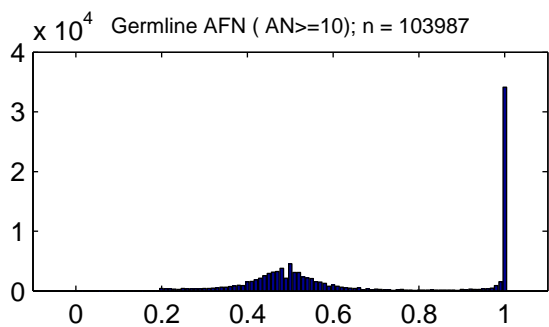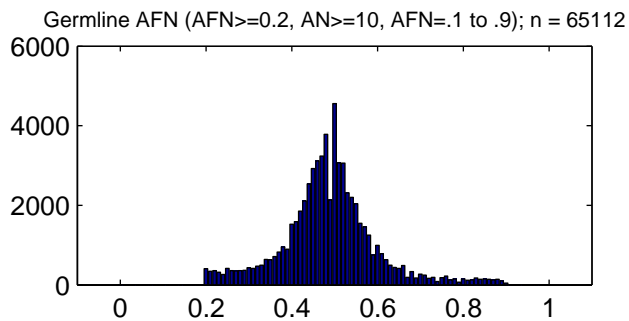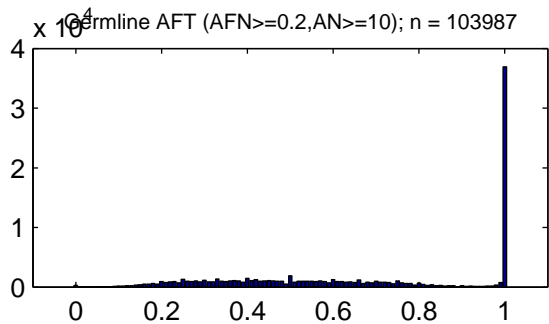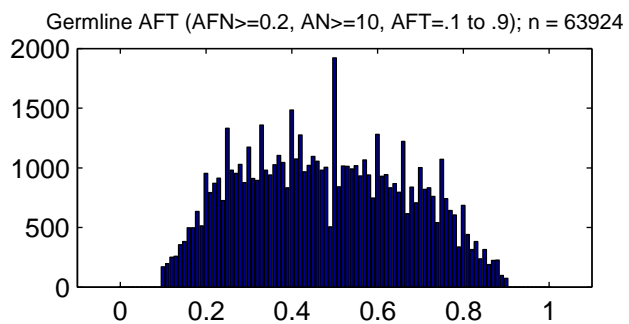



112\_ucsc.edu\_BRCA.IlluminaGA\_DNASeq.Level\_2.5.0.0 -- TCGA-AN-A0XT\_D

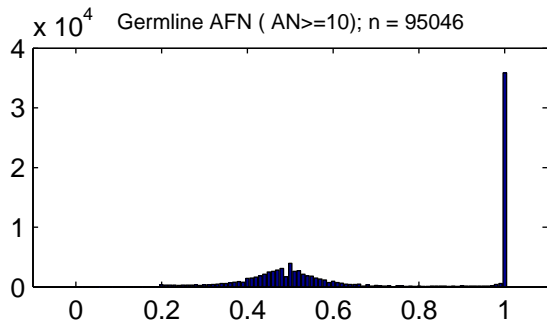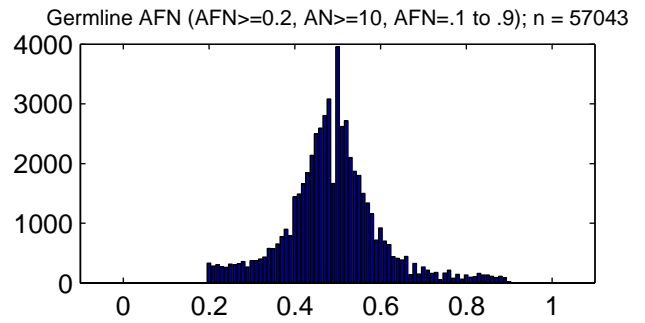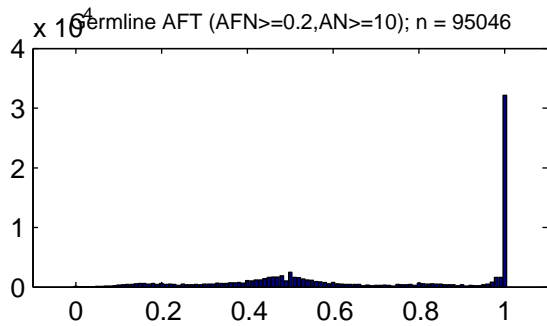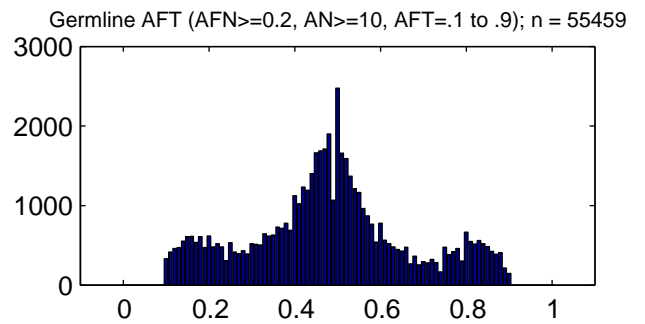

113\_ucsc.edu\_BRCA.IlluminaGA\_DNASeq.Level\_2.10.0.0 -- TCGA-BH-A0BA\_V

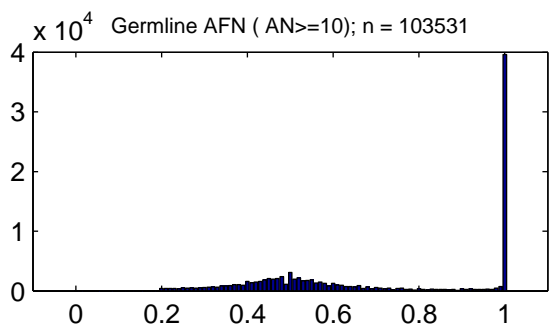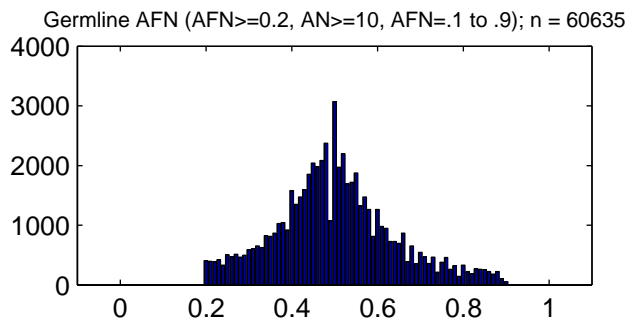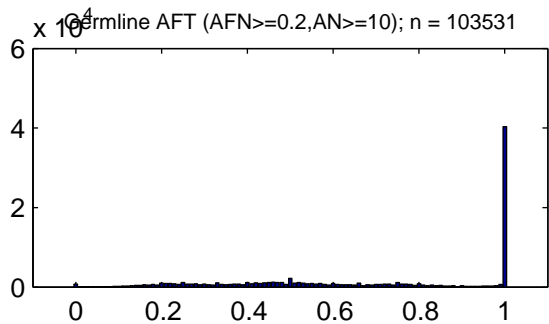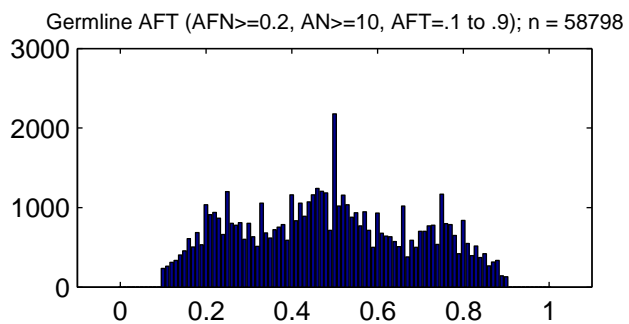

114\_ucsc.edu\_BRCA.IlluminaGA\_DNASeq.Level\_2.7.0.0 -- TCGA-AQ-A04H\_D

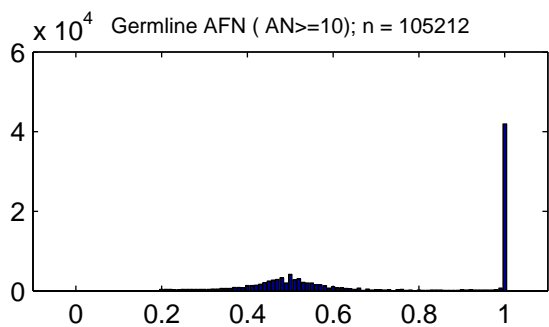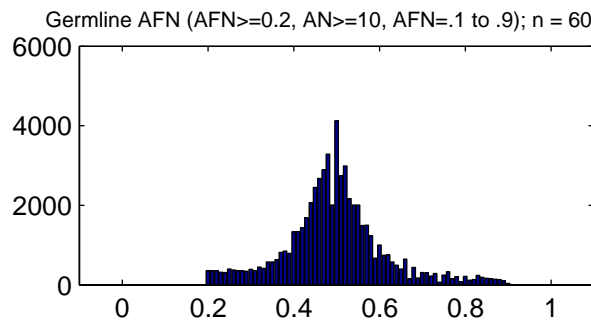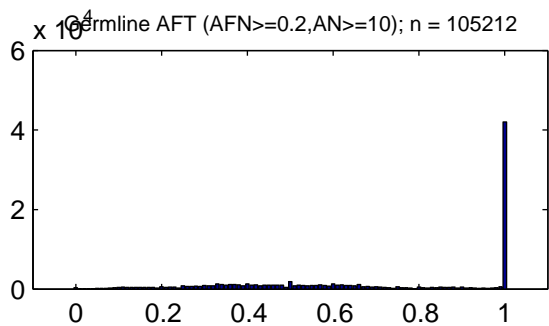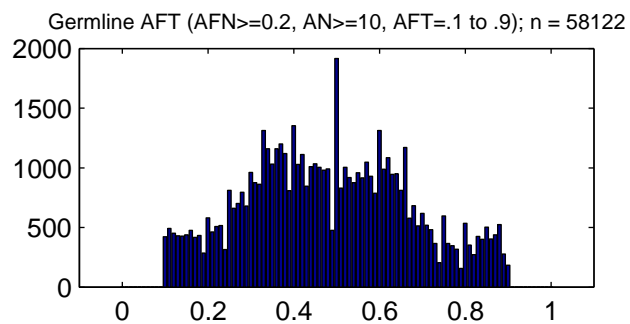

115\_ucsc.edu\_BRCA.IlluminaGA\_DNASeq.Level\_2.9.0.0 -- TCGA-B6-A0WV\_D

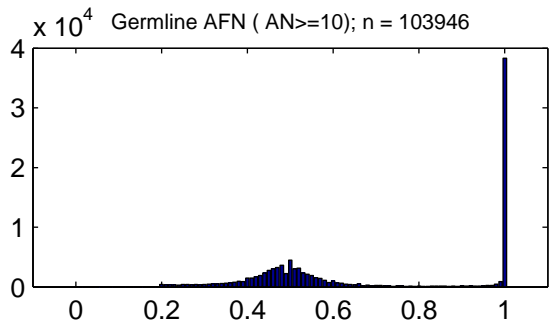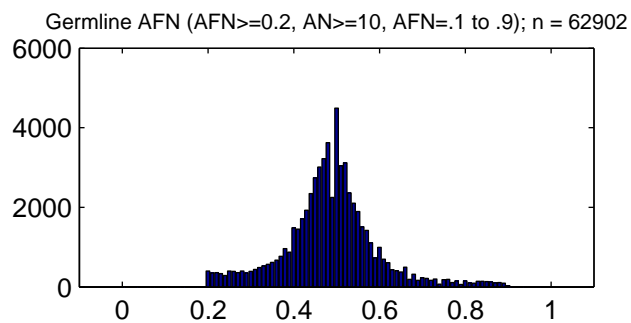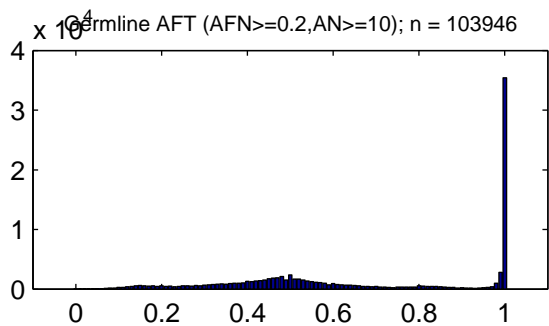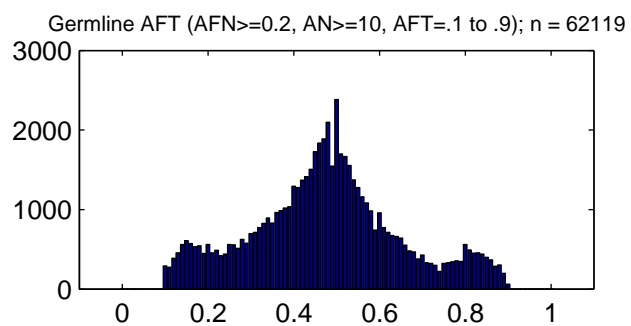

116\_ucsc.edu\_BRCA.IlluminaGA\_DNASeq.Level\_2.9.0.0 -- TCGA-B6-A0IQ\_W

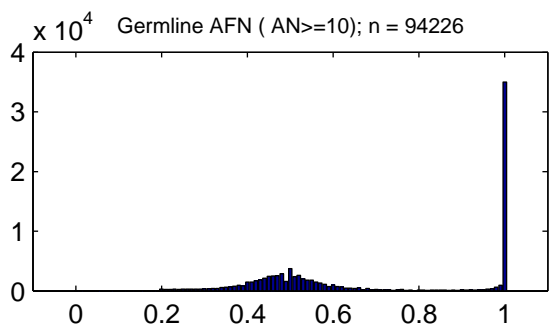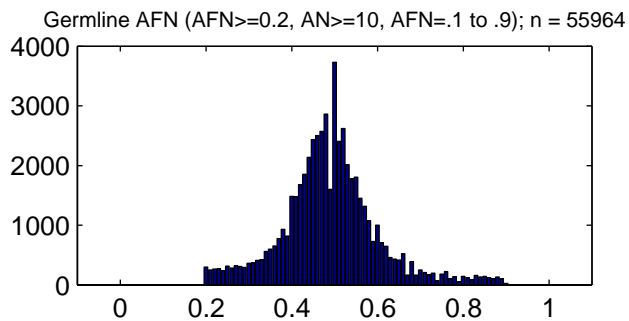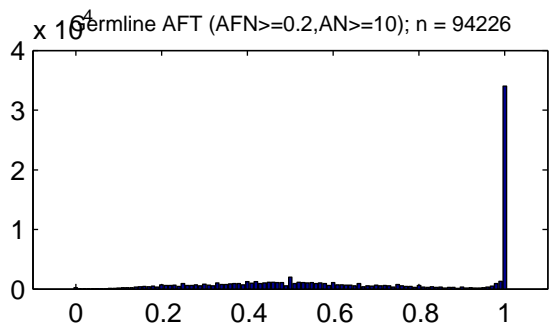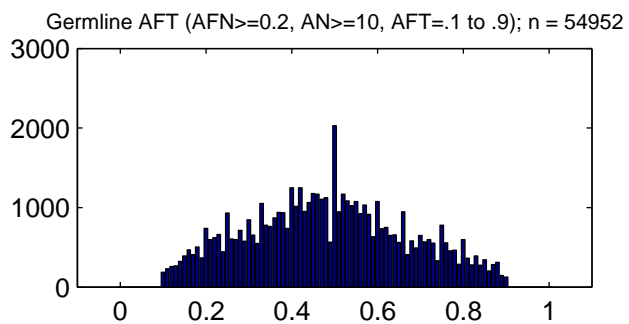

117\_ucsc.edu\_BRCA.IlluminaGA\_DNASeq.Level\_2.2.0.0 --- TCGA-A2-A0CM\_W

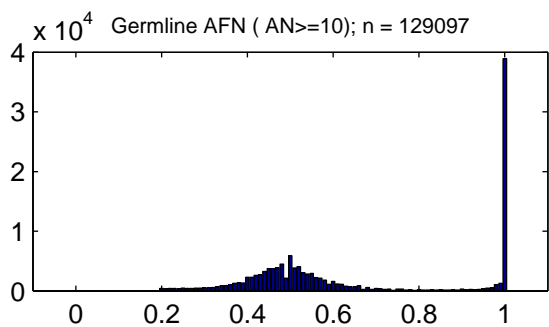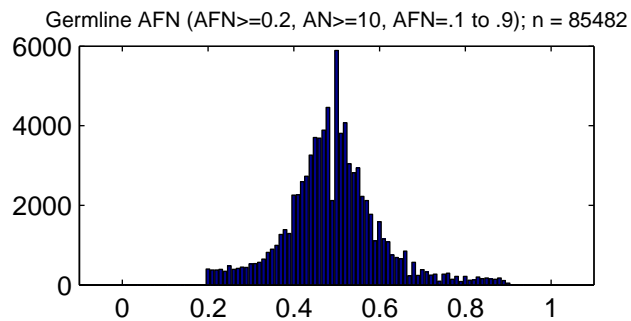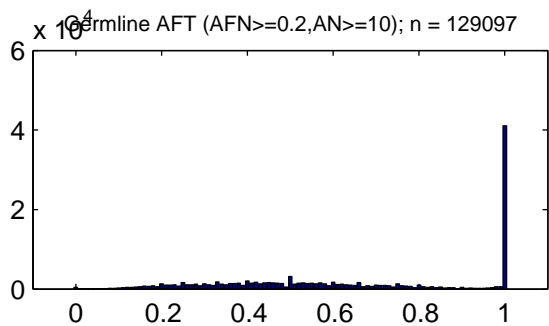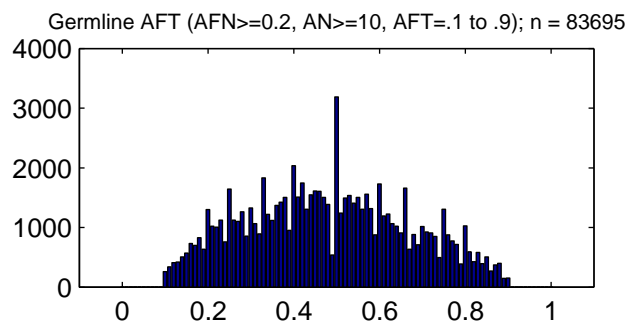

118\_ucsc.edu\_BRCA.IlluminaGA\_DNASeq.Level\_2.4.0.0 -- TCGA-A8-A081\_W

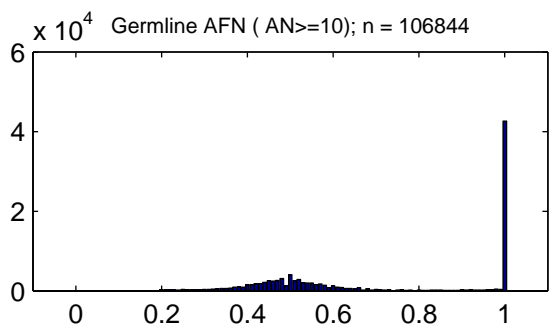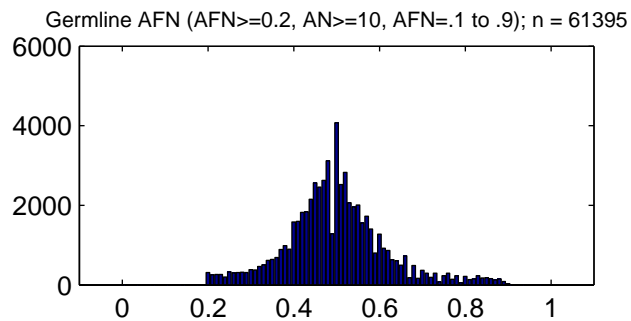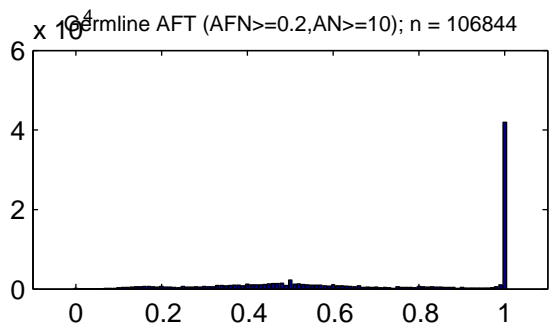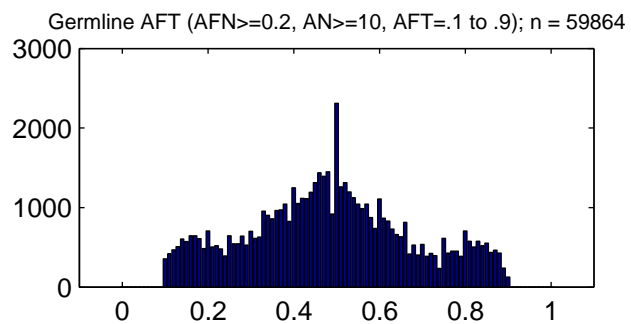

119\_ucsc.edu\_BRCA.IlluminaGA\_DNASeq.Level\_2.11.0.0 -- TCGA-C8-A130\_D

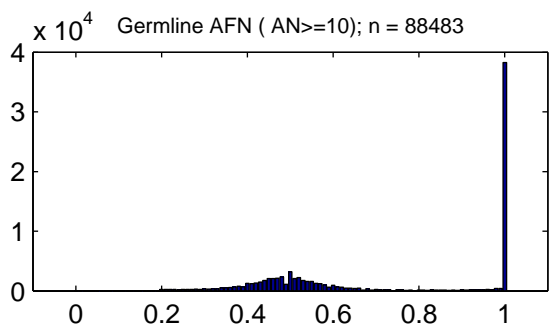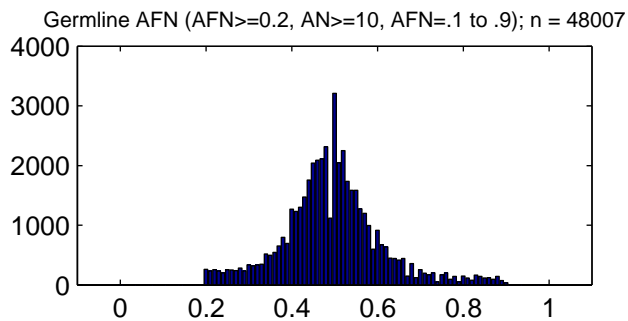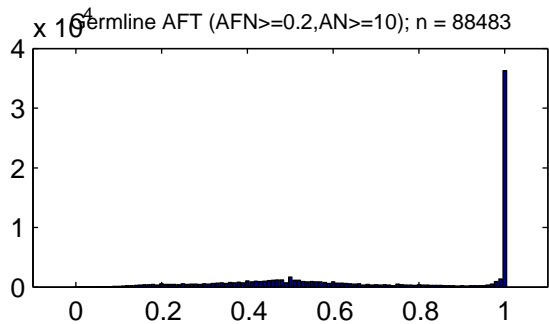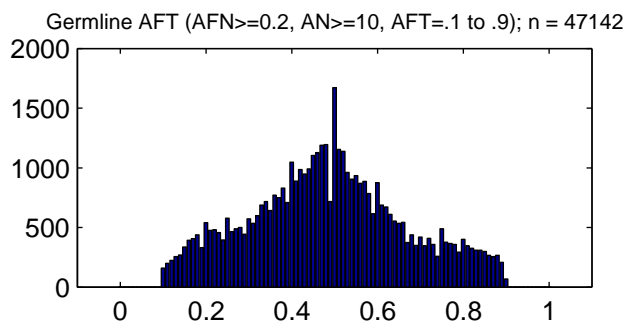



120\_ucsc.edu\_BRCA.IlluminaGA\_DNASeq.Level\_2.10.0.0 -- TCGA-BH-A0B1\_V

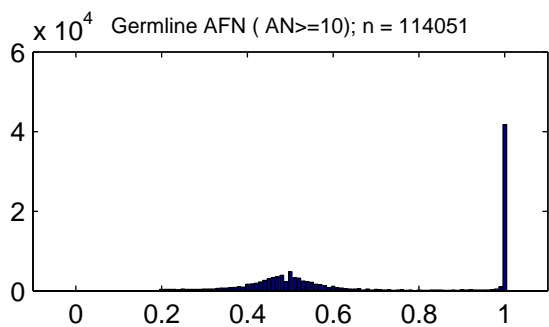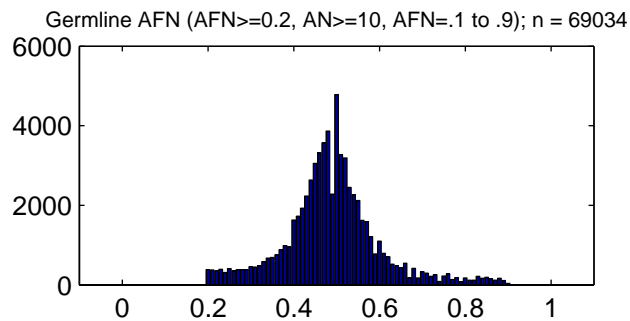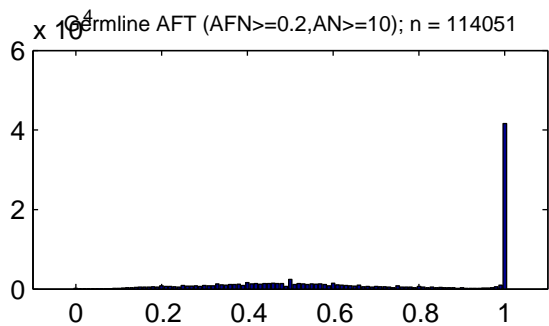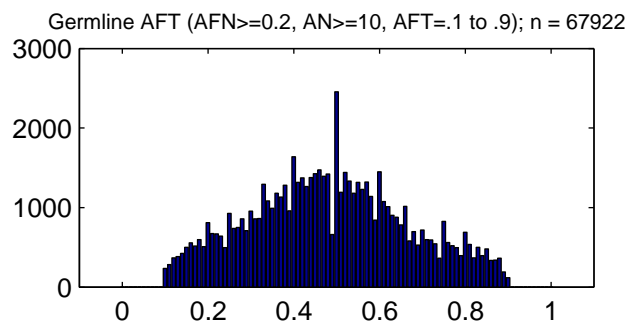

121\_ucsc.edu\_BRCA.IlluminaGA\_DNASeq.Level\_2.8.0.0 -- TCGA-AR-A0TP\_D

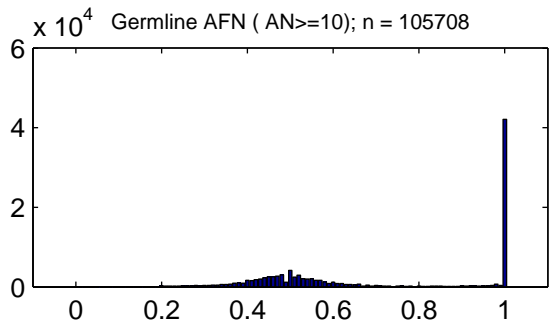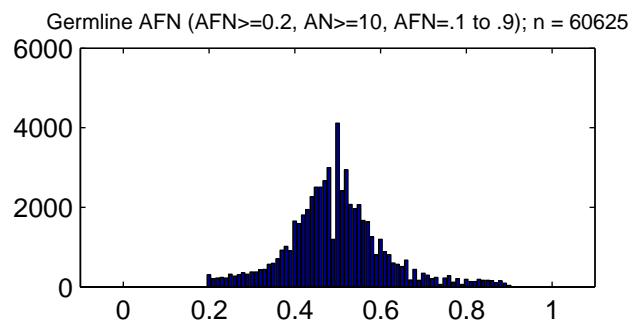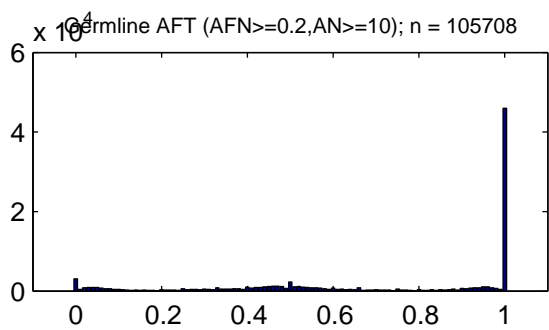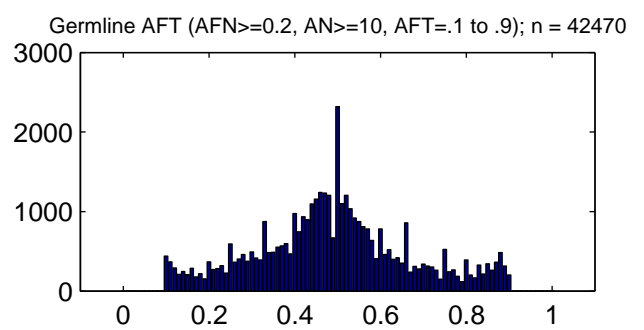

122\_ucsc.edu\_BRCA.IlluminaGA\_DNASeq.Level\_2.4.0.0 -- TCGA-A8-A09C\_W

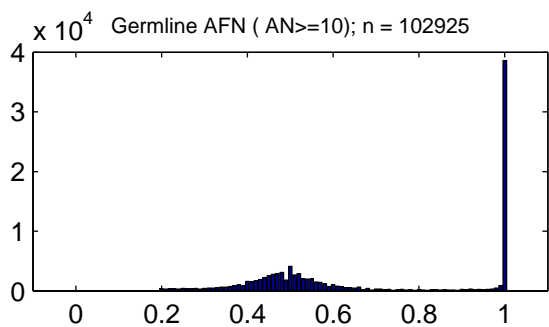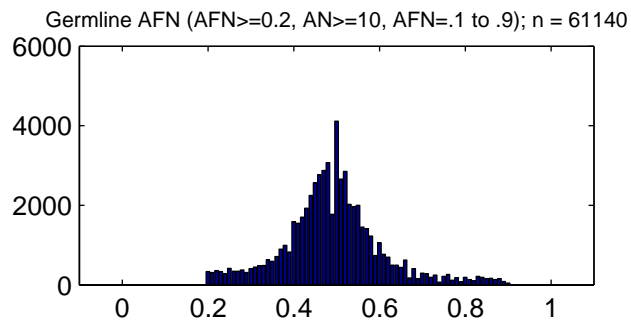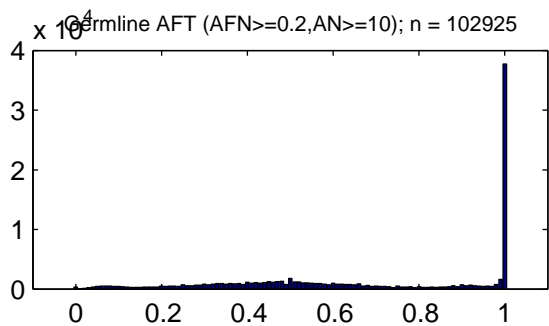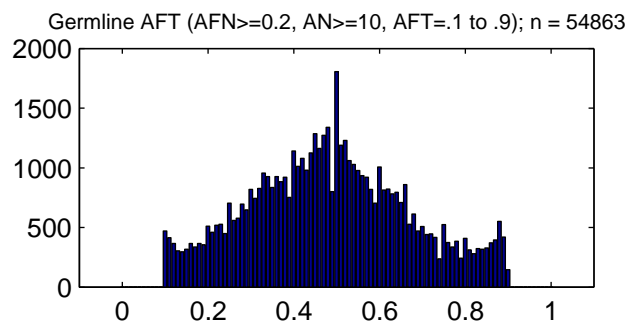

123\_ucsc.edu\_BRCA.IlluminaGA\_DNASeq.Level\_2.2.0.0 -- TCGA-A2-A0D2\_W

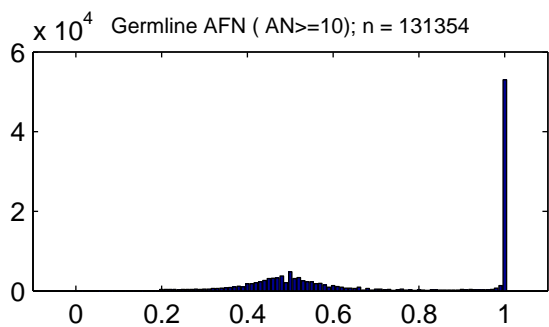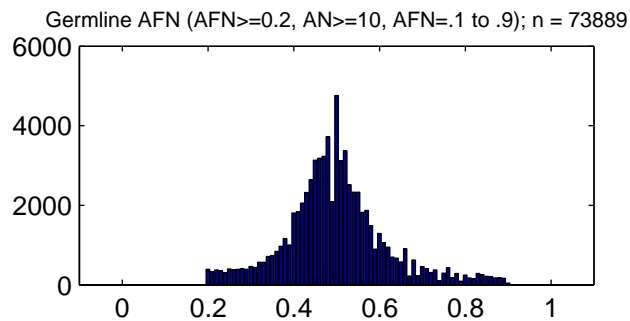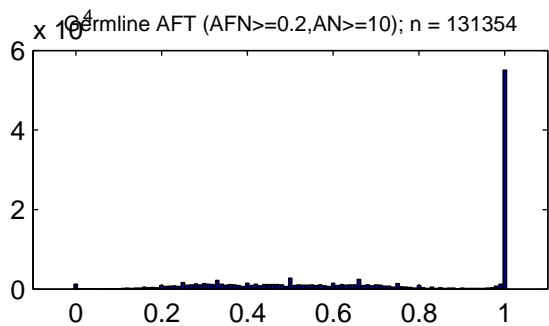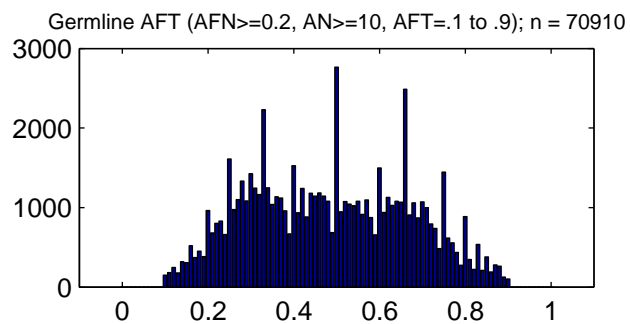

124\_ucsc.edu\_BRCA.IlluminaGA\_DNASeq.Level\_2.2.0.0 -- TCGA-A2-A0D4\_W

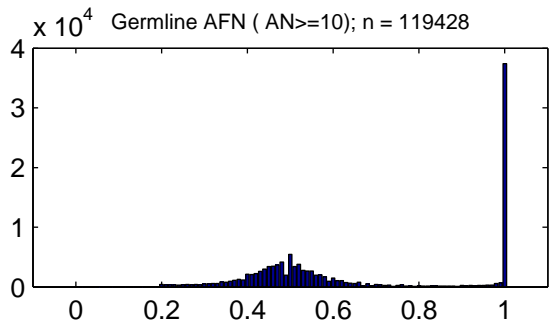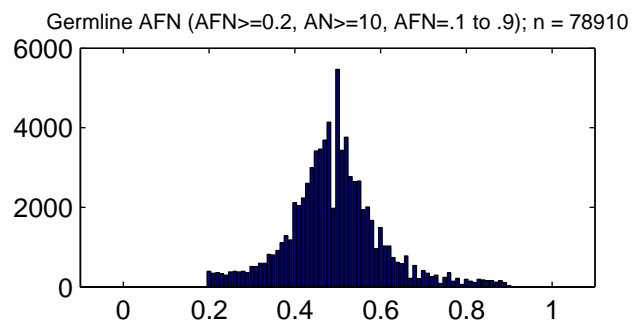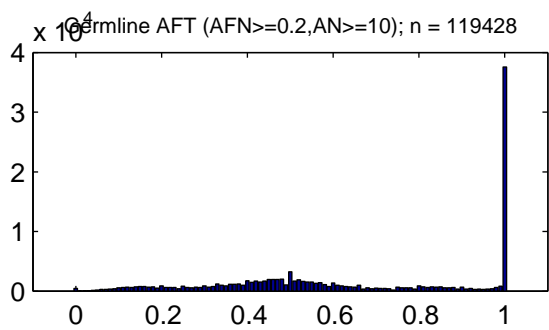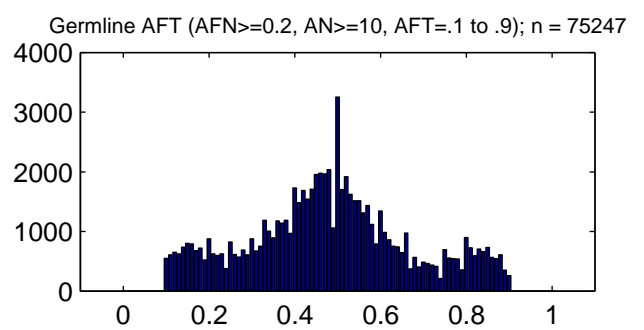

125\_ucsc.edu\_BRCA.IlluminaGA\_DNASeq.Level\_2.5.0.0 -- TCGA-AN-A0FL\_W

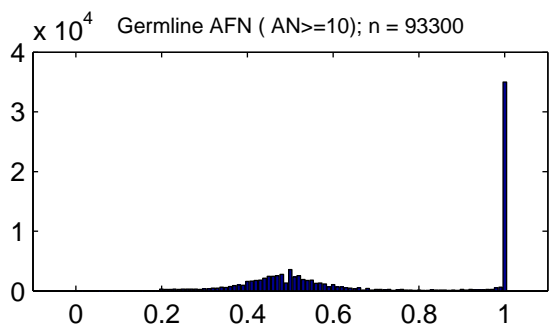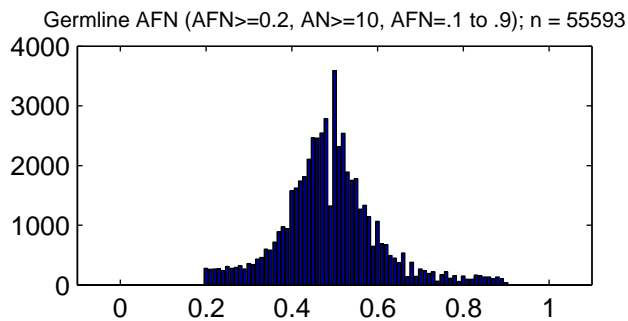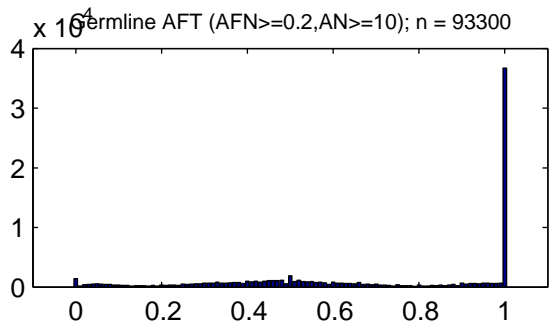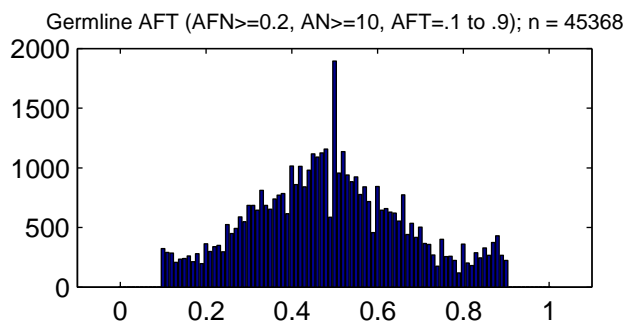

126\_ucsc.edu\_BRCA.IlluminaGA\_DNASeq.Level\_2.4.0.0 -- TCGA-A8-A08B\_W

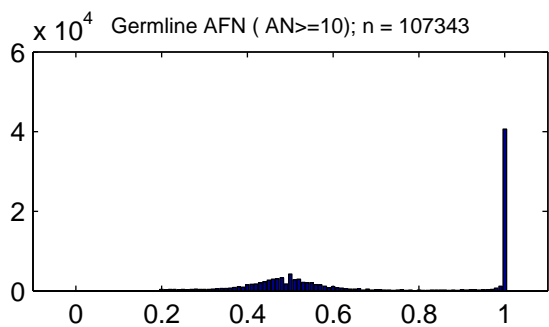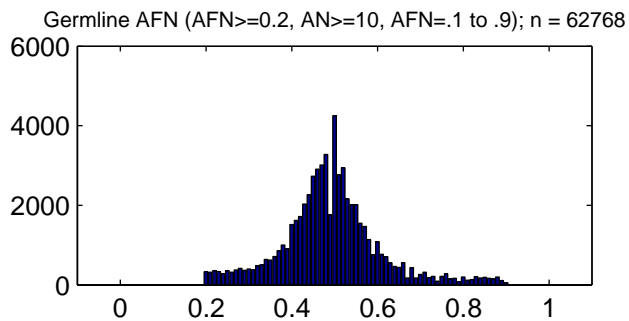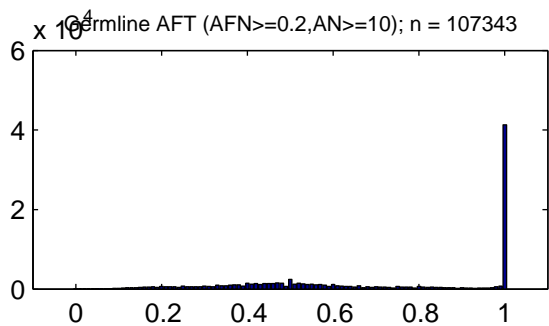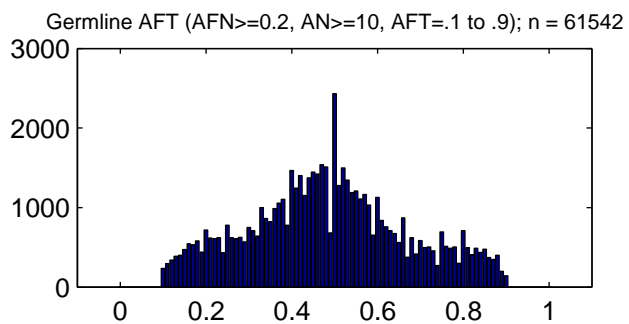

127\_ucsc.edu\_BRCA.IlluminaGA\_DNASeq.Level\_2.14.0.0 -- TCGA-AR-A0TY\_V

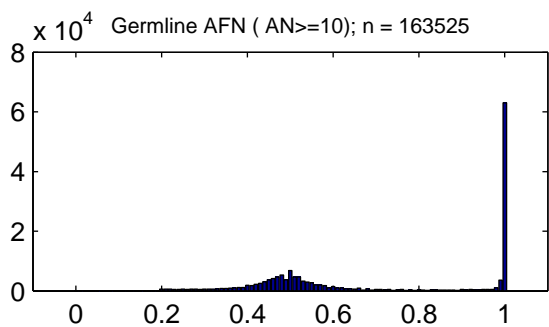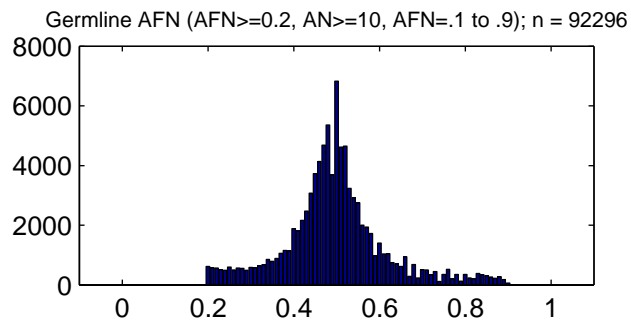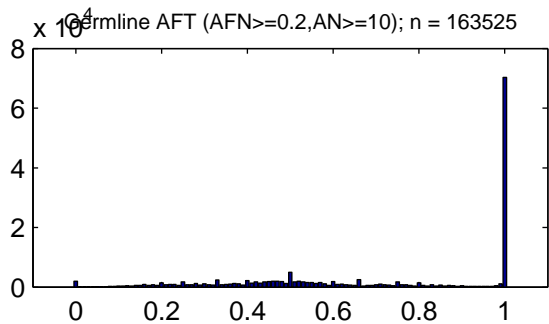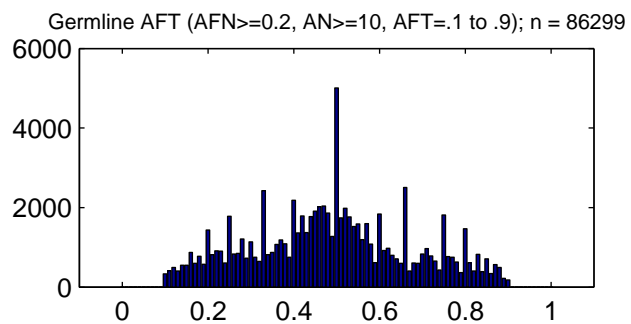



128\_ucsc.edu\_BRCA.IlluminaGA\_DNASeq.Level\_2.5.0.0 -- TCGA-AN-A0FV\_W

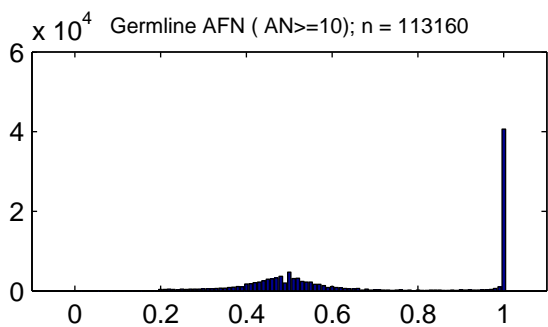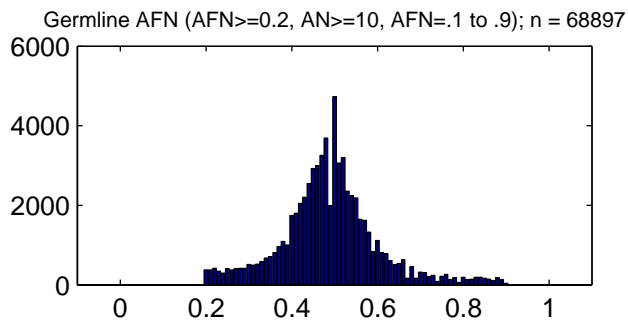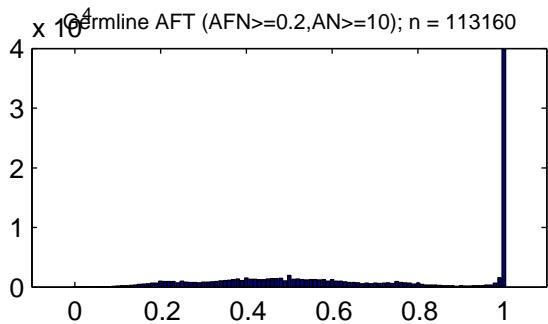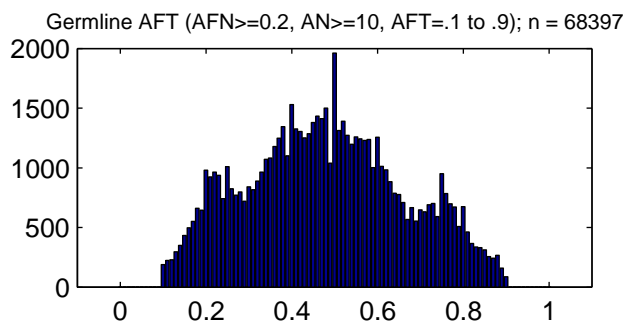

129\_ucsc.edu\_BRCA.IlluminaGA\_DNASeq.Level\_2.4.0.0 -- TCGA-A8-A06X\_W

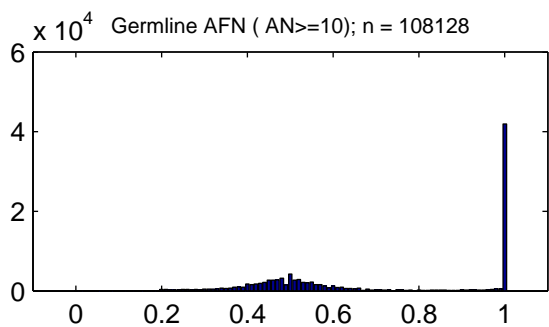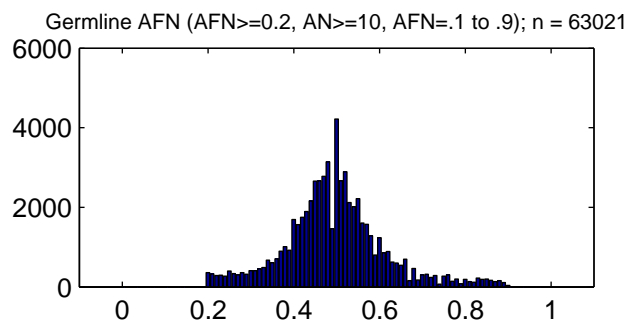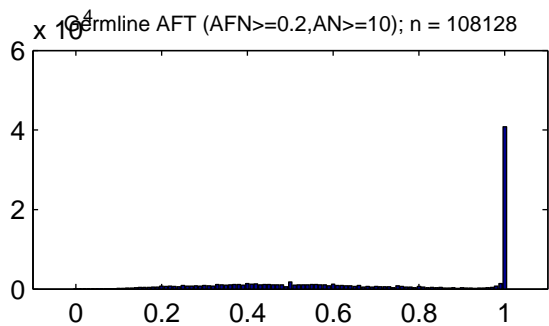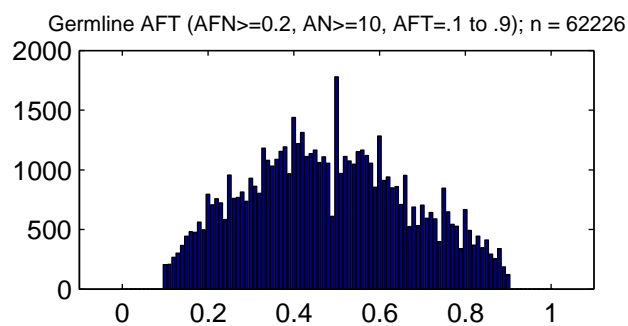

130\_ucsc.edu\_BRCA.IlluminaGA\_DNASeq.Level\_2.4.0.0 -- TCGA-A8-A09K\_W

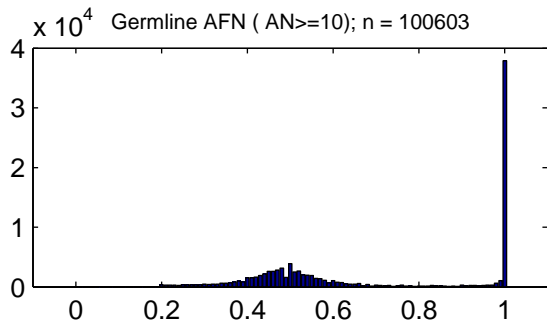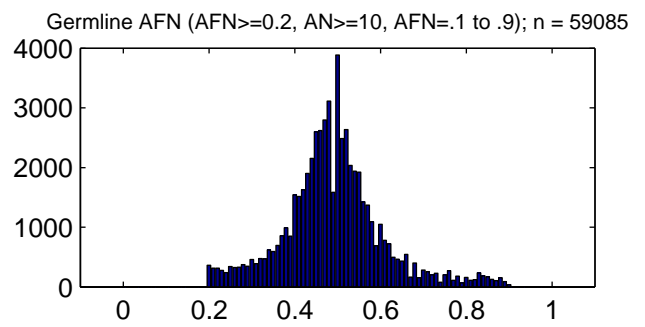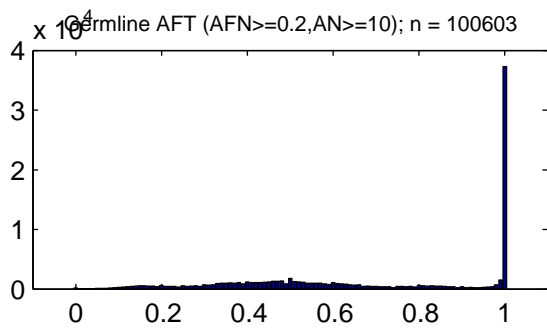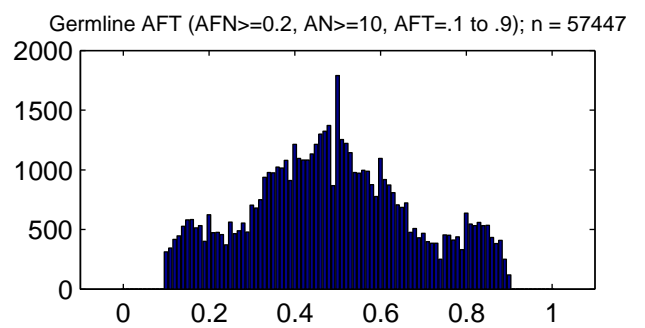

131\_ucsc.edu\_BRCA.IlluminaGA\_DNASeq.Level\_2.9.0.0 -- TCGA-B6-A0IG\_W

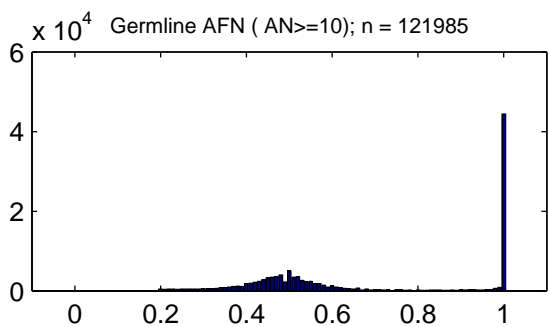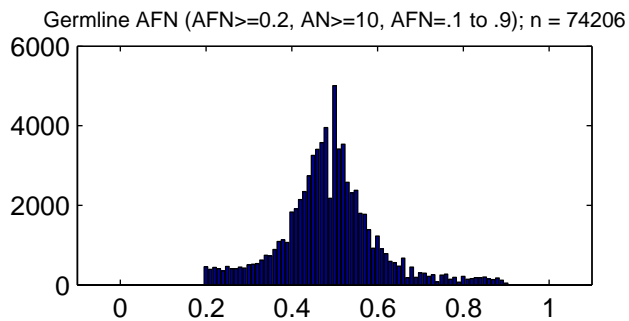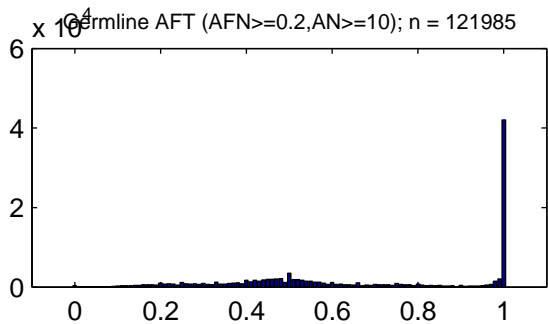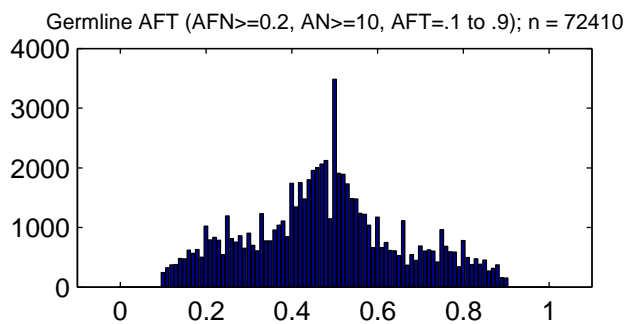

132\_ucsc.edu\_BRCA.IlluminaGA\_DNASeq.Level\_2.11.0.0 -- TCGA-C8-A1HN\_C

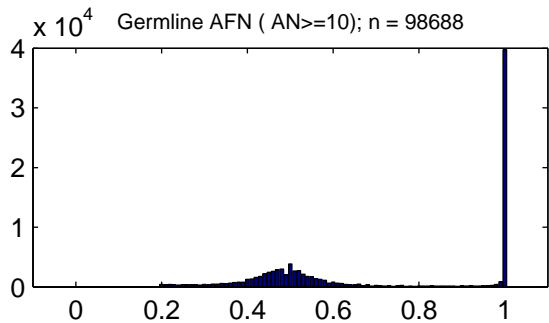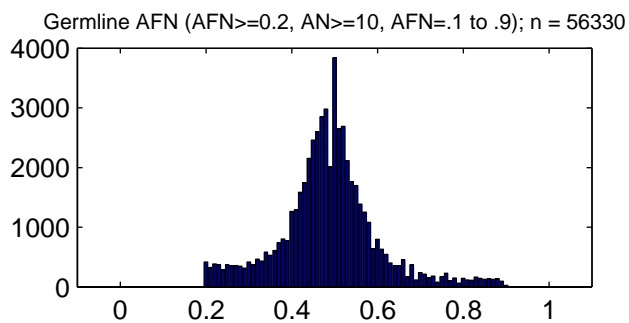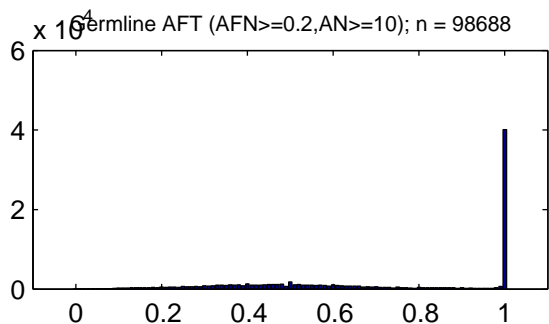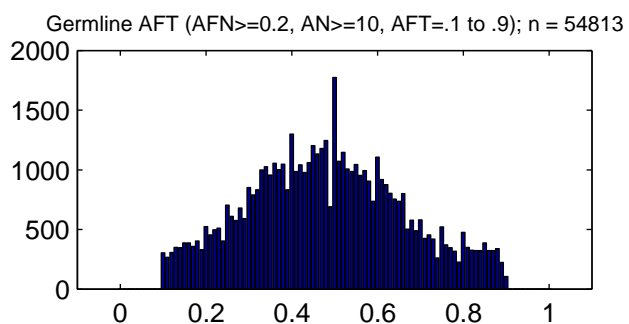

133\_ucsc.edu\_BRCA.IlluminaGA\_DNASeq.Level\_2.2.0.0 -- TCGA-A2-A0CW\_D

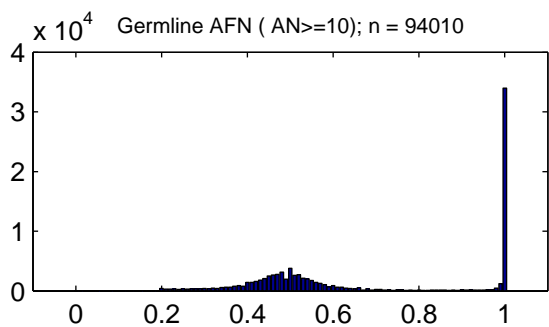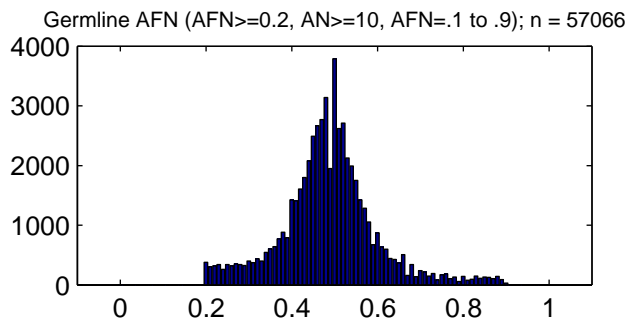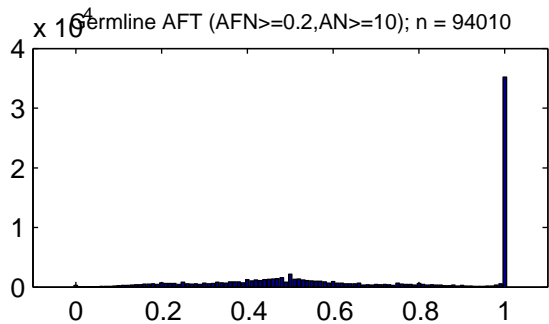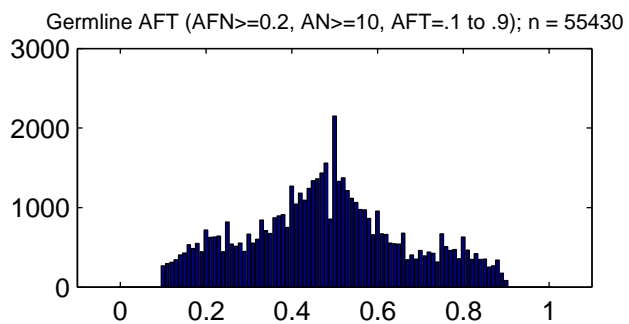

134\_ucsc.edu\_BRCA.IlluminaGA\_DNASeq.Level\_2.4.0.0 -- TCGA-A8-A0A9\_W

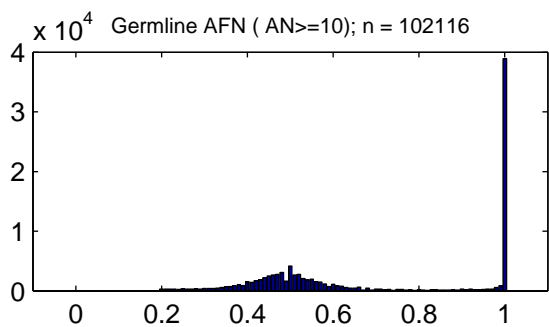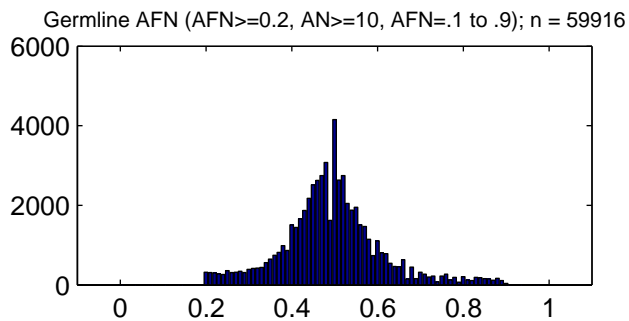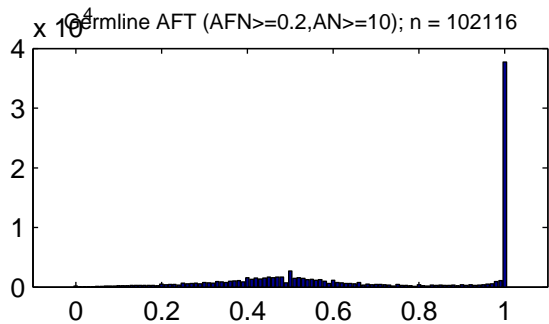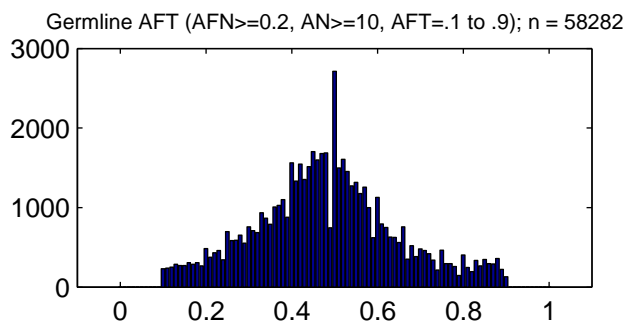

135\_ucsc.edu\_BRCA.IlluminaGA\_DNASeq.Level\_2.13.0.0 -- TCGA-E2-A158\_D

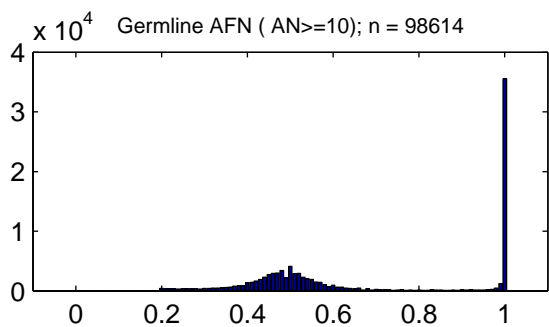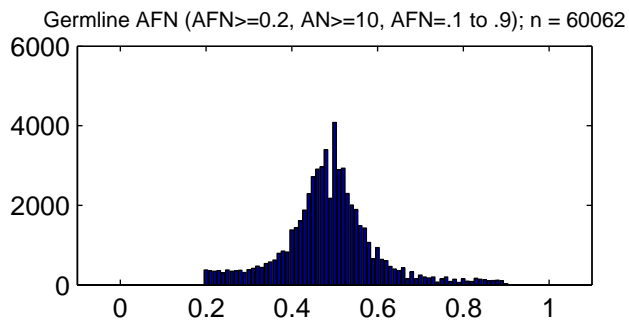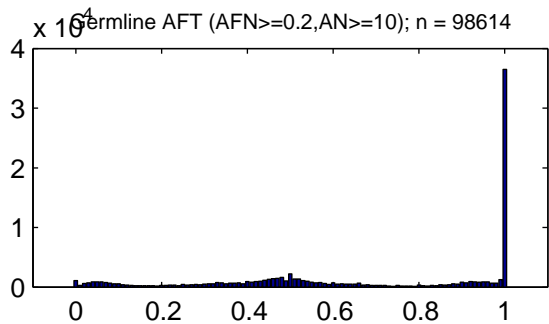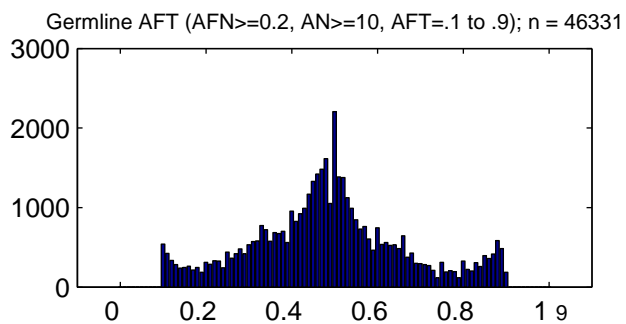



136\_ucsc.edu\_BRCA.IlluminaGA\_DNASeq.Level\_2.8.0.0 -- TCGA-AR-A1A1\_D

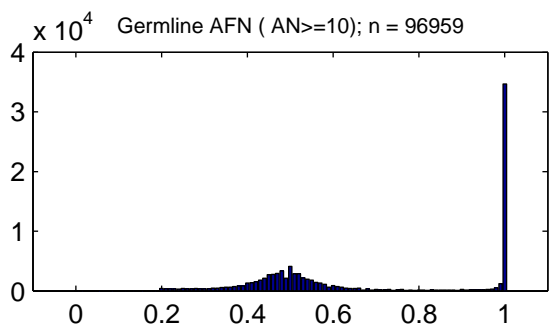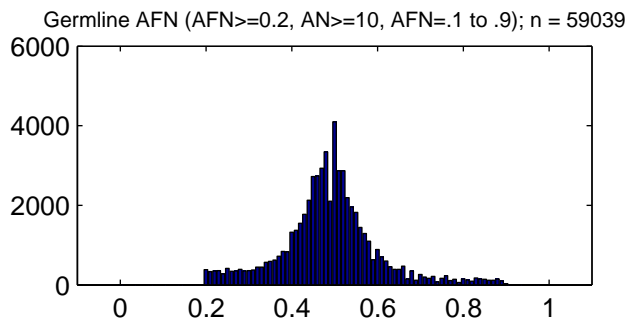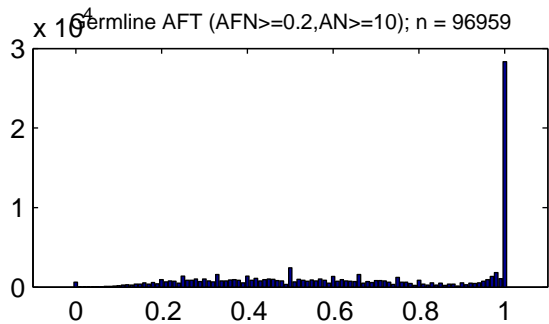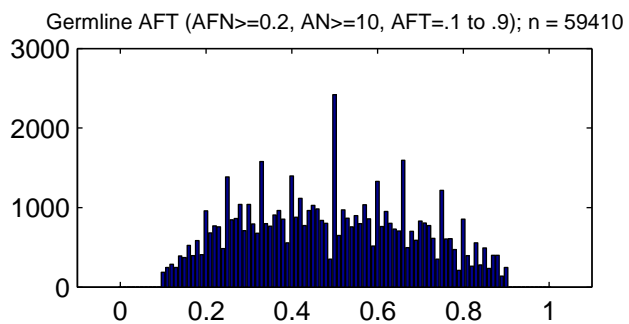

137\_ucsc.edu\_BRCA.IlluminaGA\_DNASeq.Level\_2.9.0.0 -- TCGA-B6-A0RU\_D

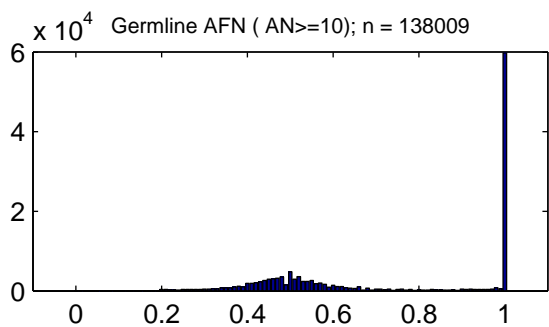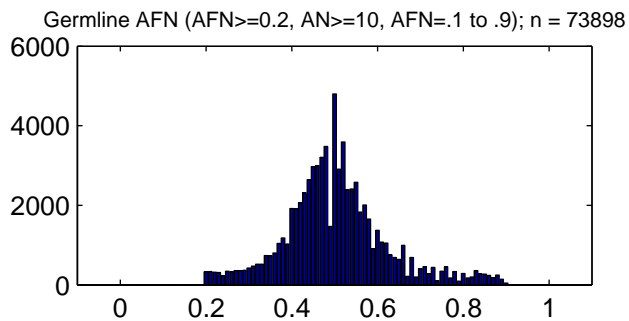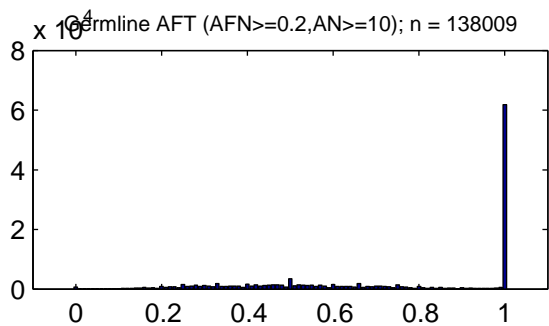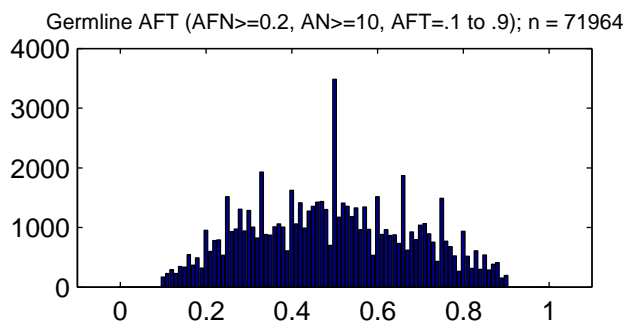

138\_ucsc.edu\_BRCA.IlluminaGA\_DNASeq.Level\_2.8.0.0 -- TCGA-AR-A0TZ\_D

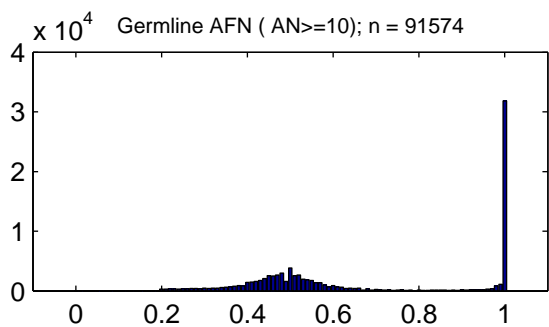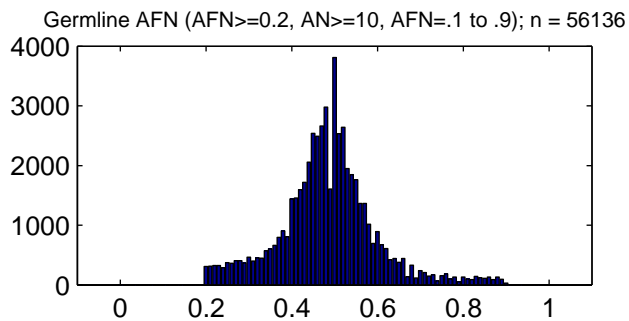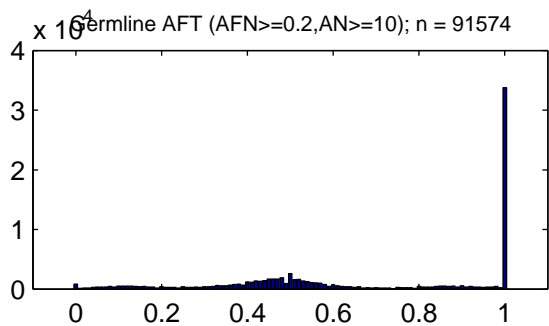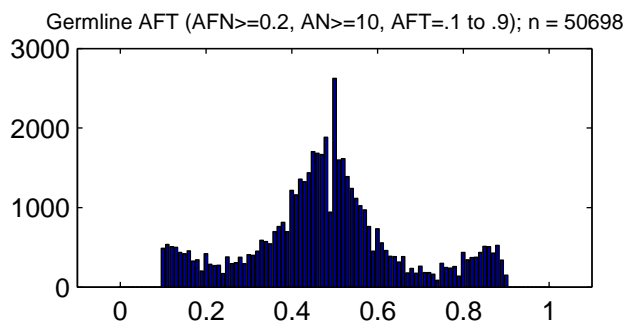

139\_ucsc.edu\_BRCA.IlluminaGA\_DNASeq.Level\_2.8.0.0 -- TCGA-AR-A0TV\_D

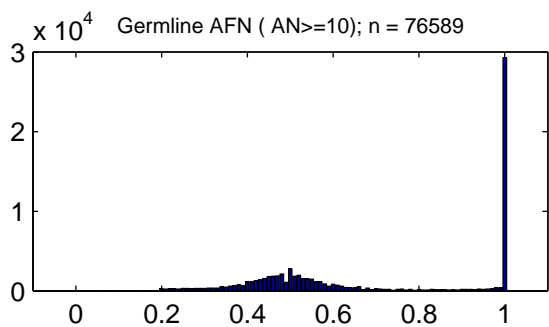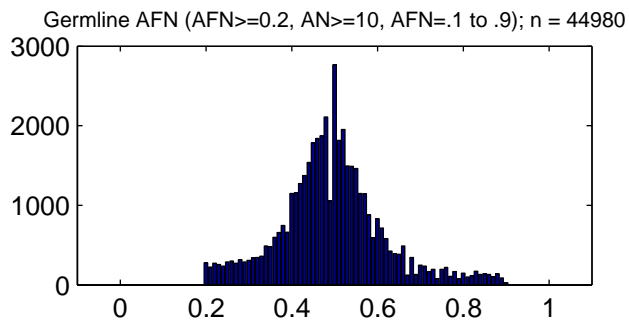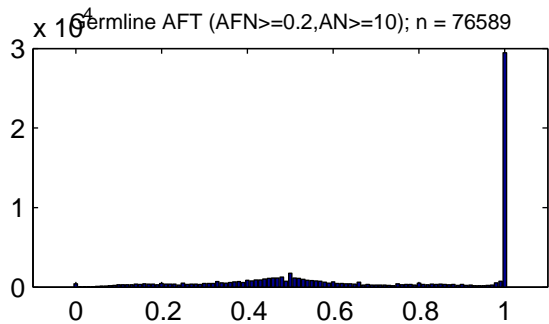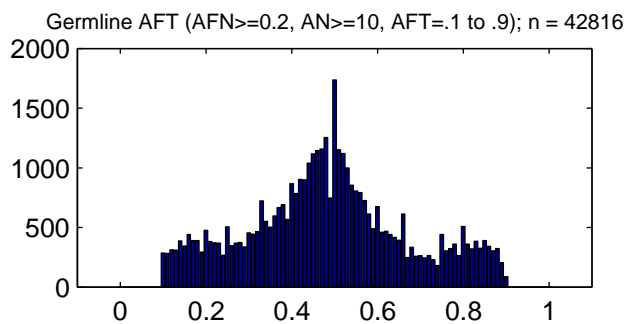

140\_ucsc.edu\_BRCA.IlluminaGA\_DNASeq.Level\_2.9.0.0 -- TCGA-B6-A0IO\_W

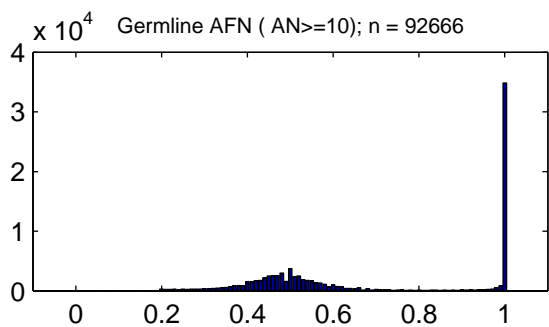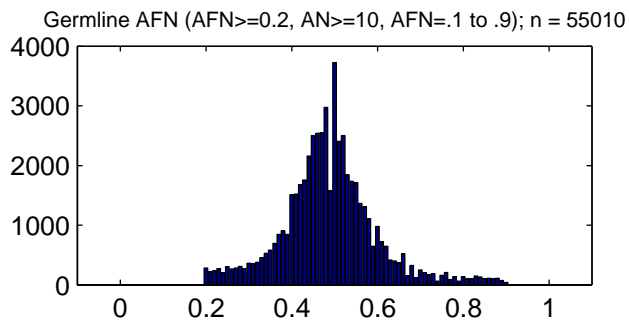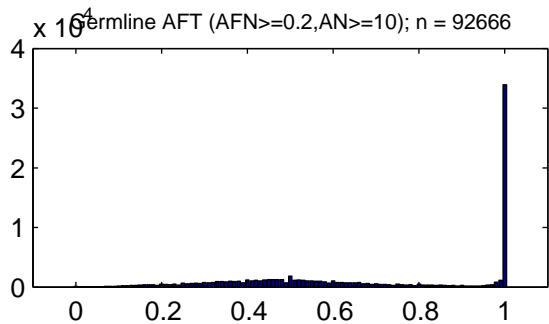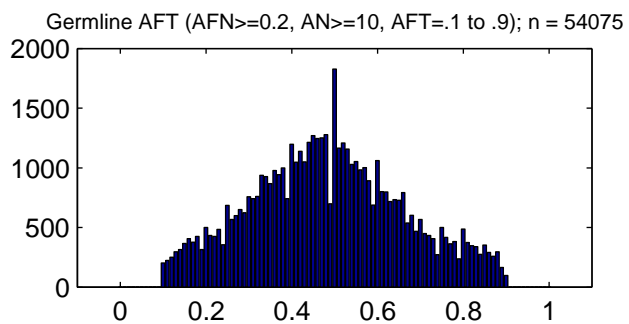

141\_ucsc.edu\_BRCA.IlluminaGA\_DNASeq.Level\_2.9.0.0 -- TCGA-B6-A0IB\_W

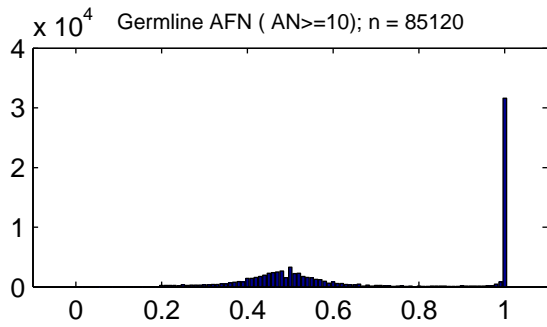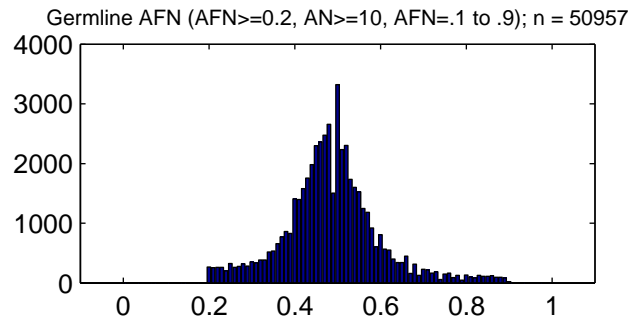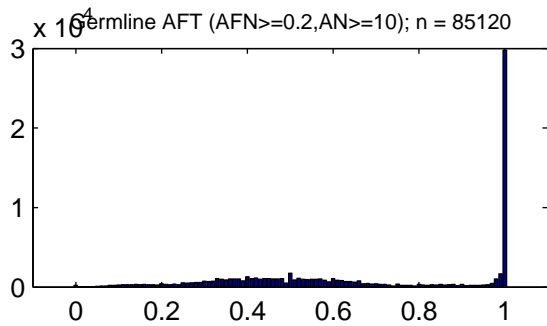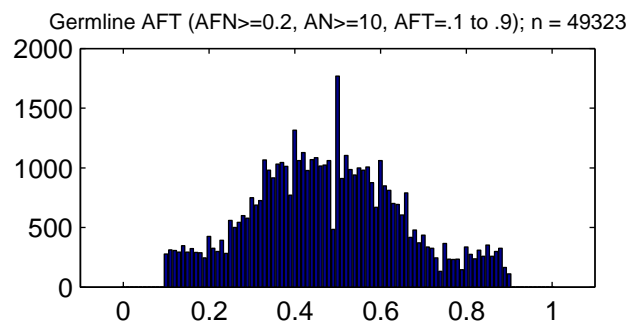

142\_ucsc.edu\_BRCA.IlluminaGA\_DNASeq.Level\_2.4.0.0 -- TCGA-A8-A07B\_W

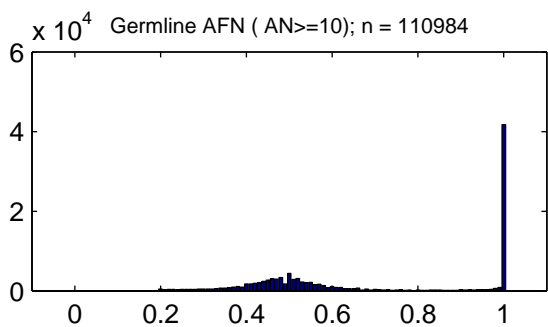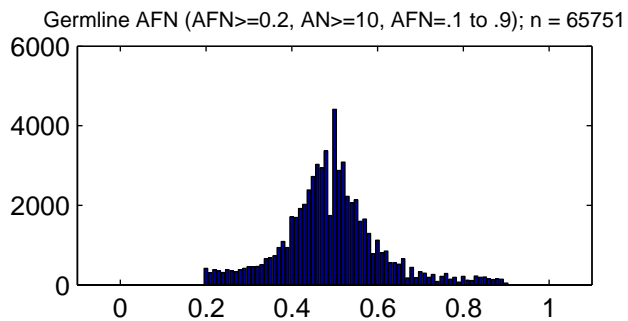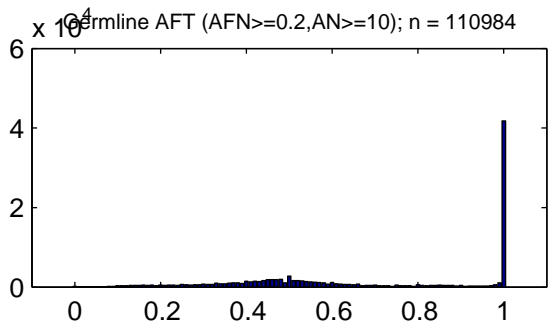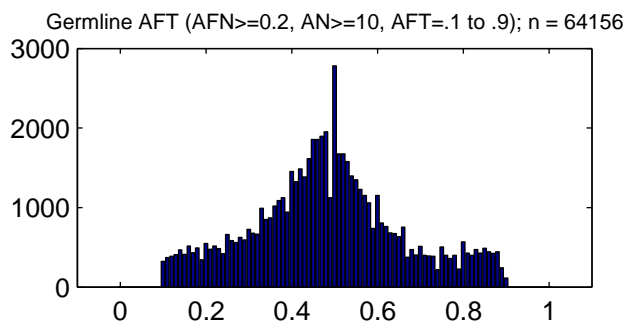

143\_ucsc.edu\_BRCA.IlluminaGA\_DNASeq.Level\_2.9.0.0 -- TCGA-B6-A0IJ\_W

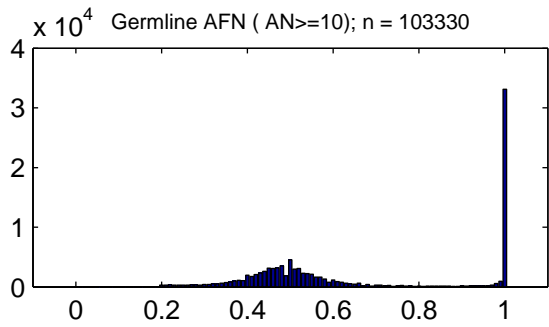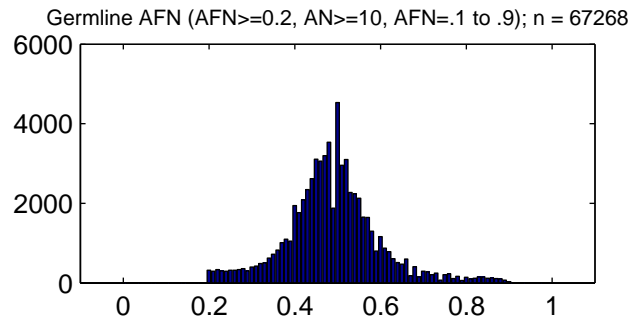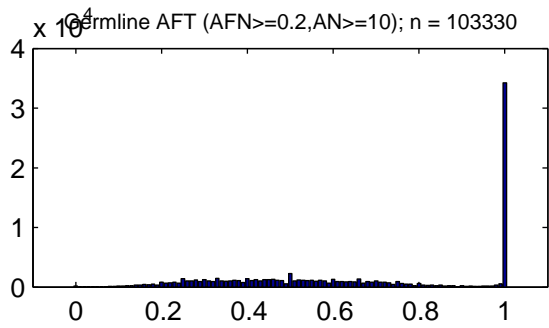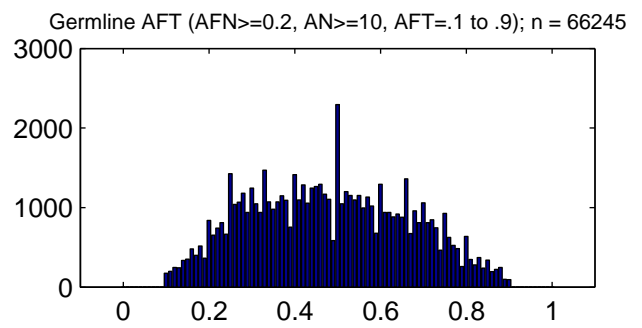



144\_ucsc.edu\_BRCA.IlluminaGA\_DNASeq.Level\_2.10.0.0 -- TCGA-BH-A0B8\_V

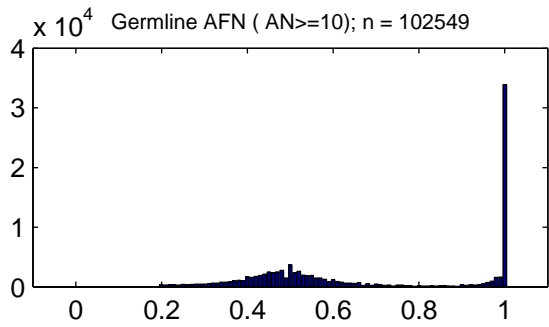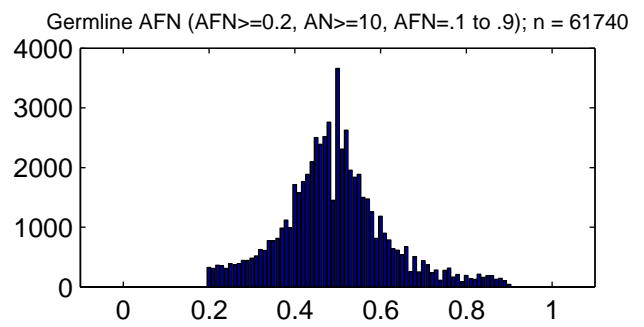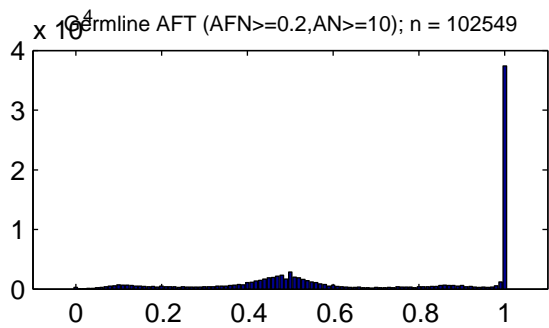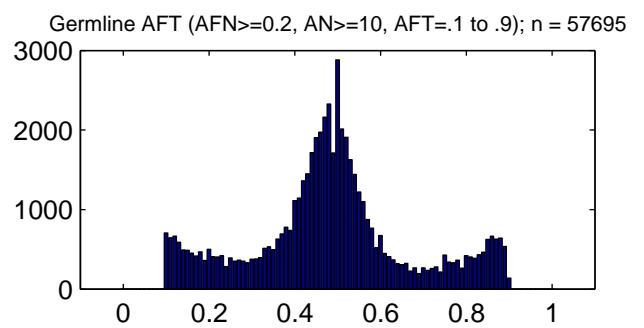

145\_ucsc.edu\_BRCA.IlluminaGA\_DNASeq.Level\_2.10.0.0 -- TCGA-BH-A0HN\_I

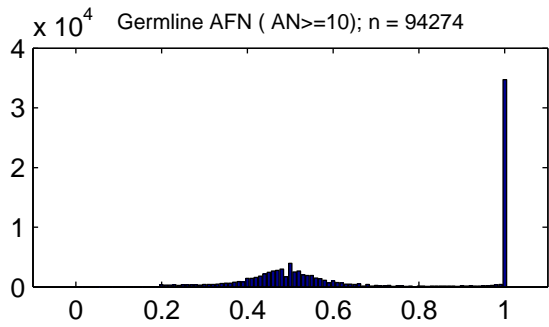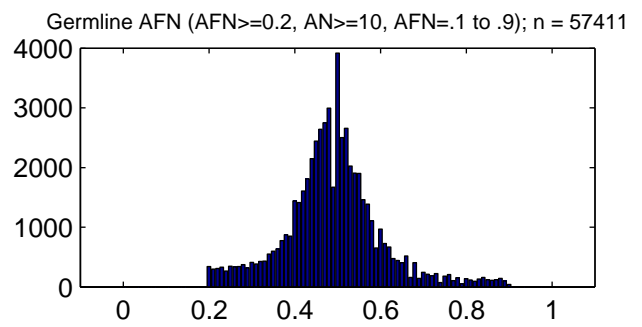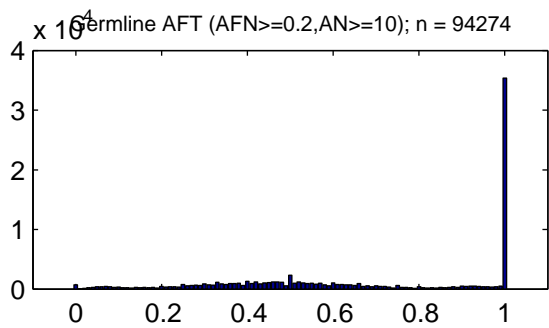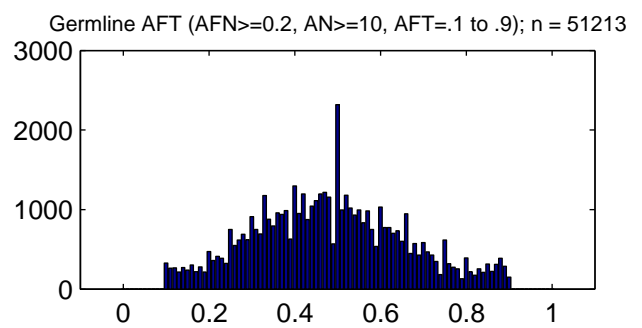

146\_ucsc.edu\_BRCA.IlluminaGA\_DNASeq.Level\_2.4.0.0 -- TCGA-A8-A06Q\_W

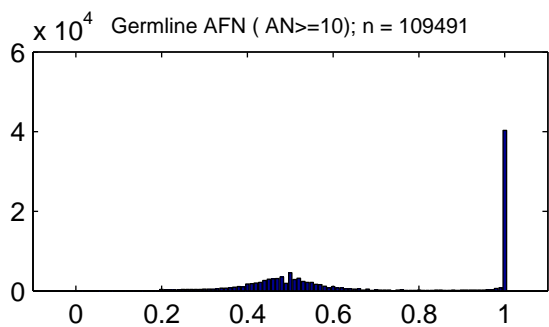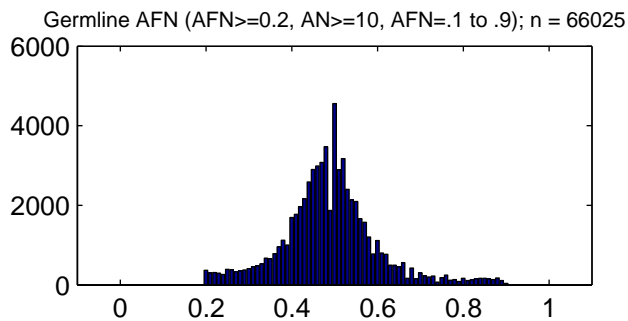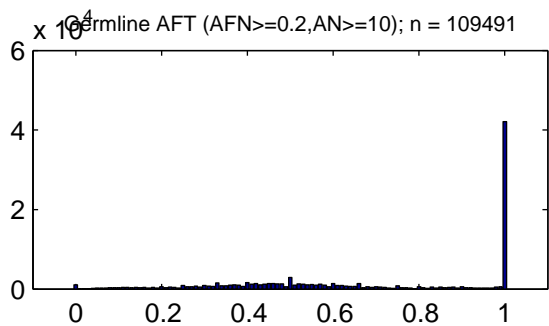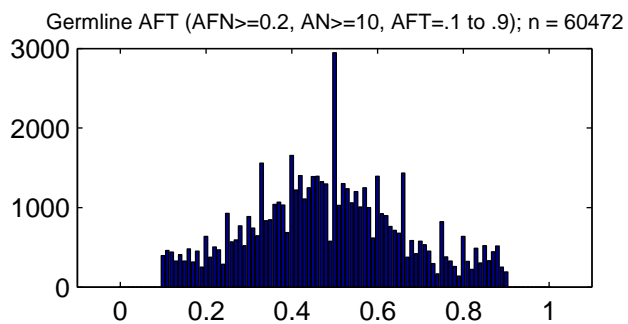

147\_ucsc.edu\_BRCA.IlluminaGA\_DNASeq.Level\_2.10.0.0 -- TCGA-BH-A0AV\_I

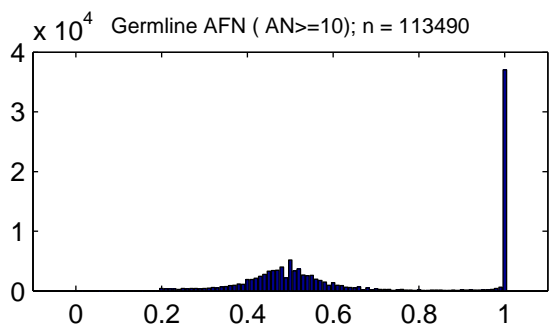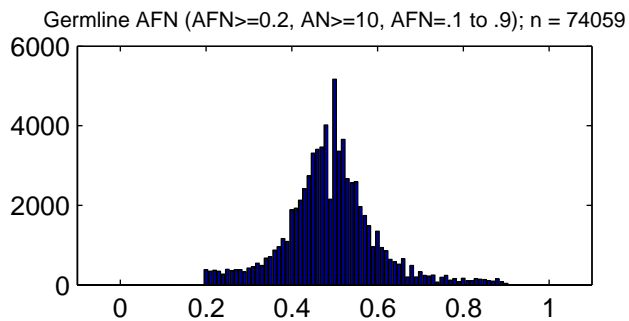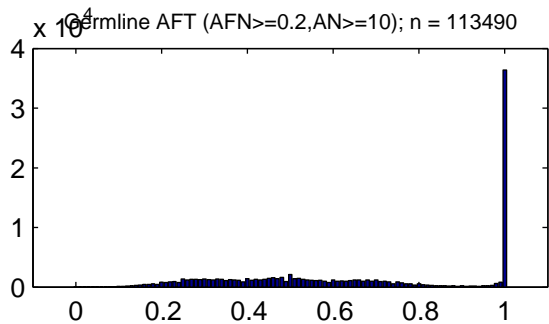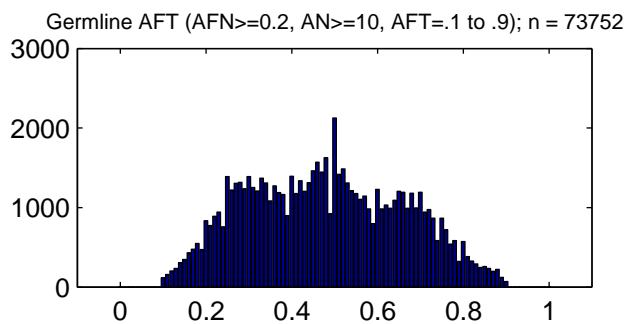

148\_ucsc.edu\_BRCA.IlluminaGA\_DNASeq.Level\_2.2.0.0 -- TCGA-A2-A0D1\_W

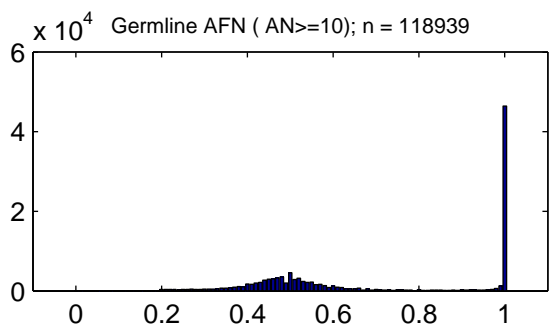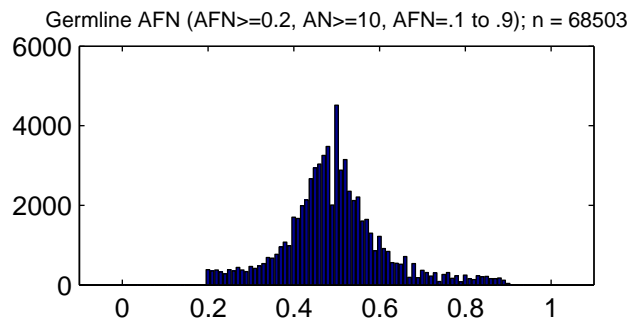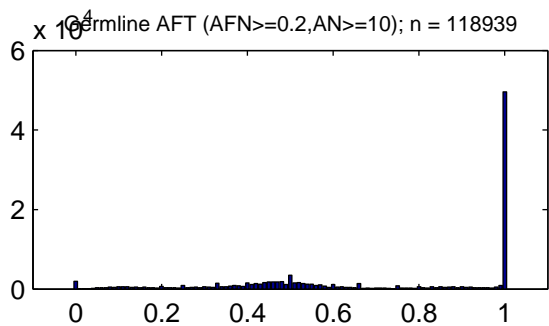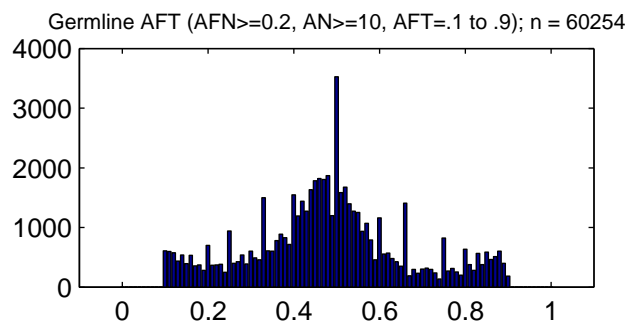

149\_ucsc.edu\_BRCA.IlluminaGA\_DNASeq.Level\_2.13.0.0 -- TCGA-E2-A15S\_C

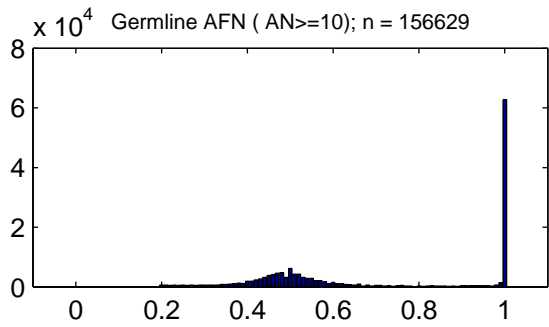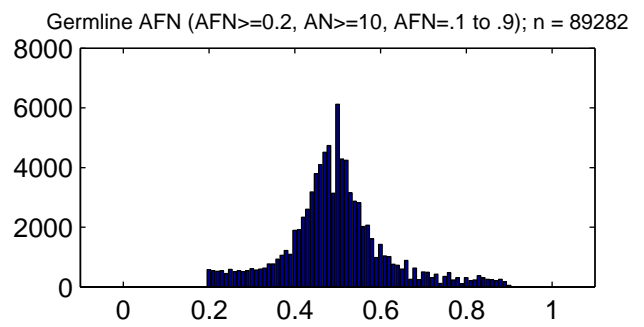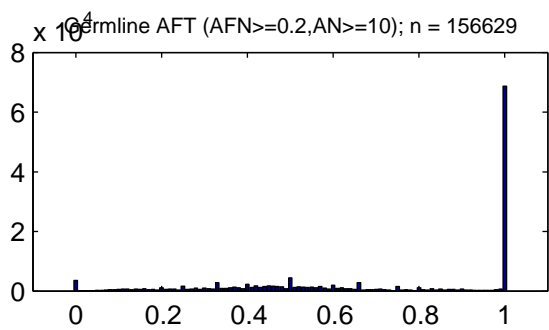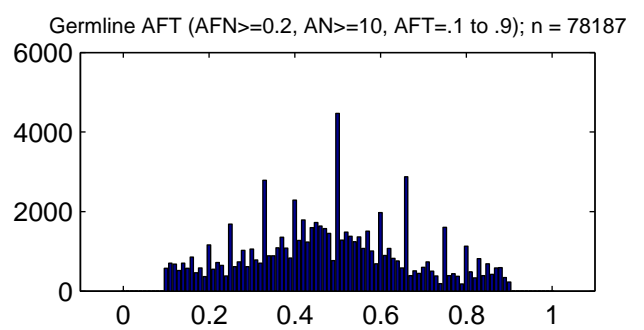

150\_ucsc.edu\_BRCA.IlluminaGA\_DNASeq.Level\_2.4.0.0 -- TCGA-A8-A06N\_W

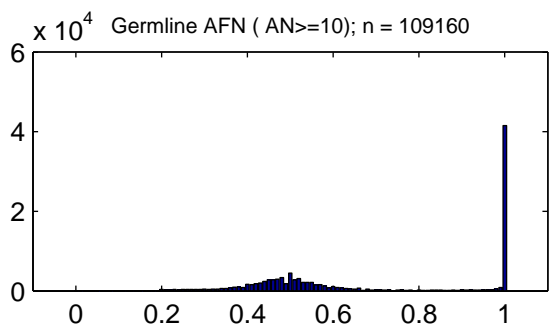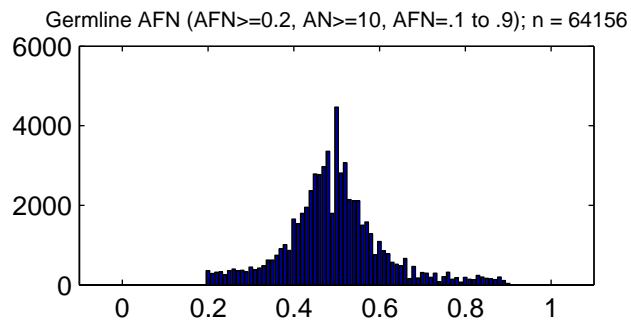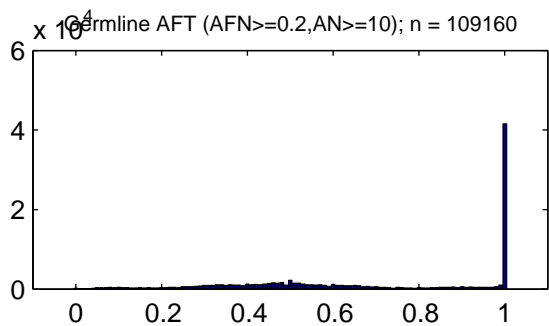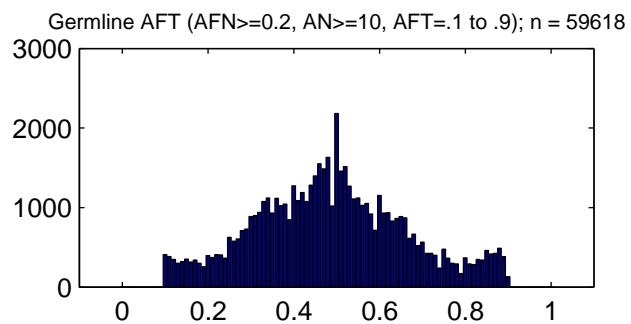

151\_ucsc.edu\_BRCA.IlluminaGA\_DNASeq.Level\_2.13.0.0 -- TCGA-E2-A1B0\_C

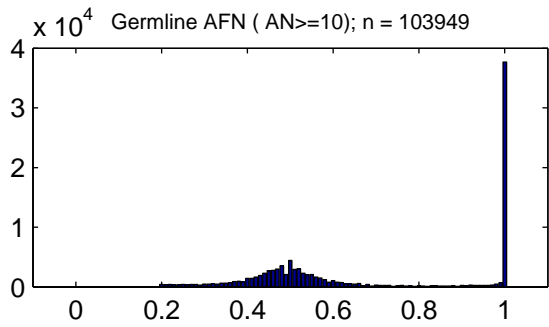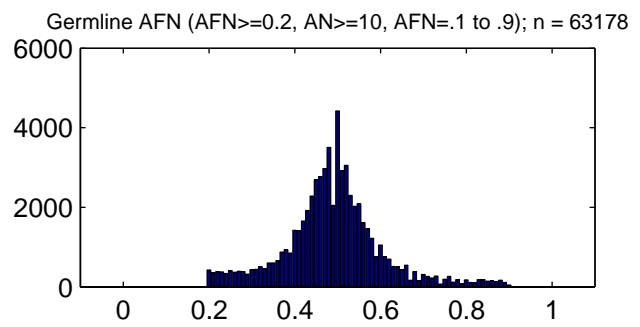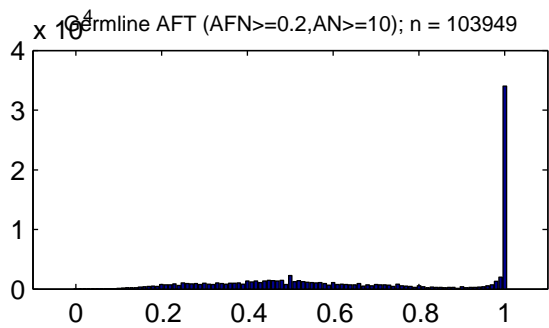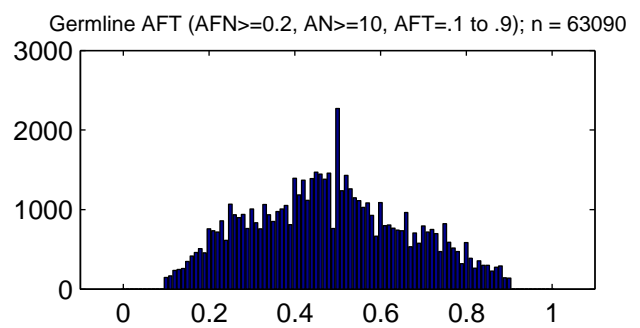



152\_ucsc.edu\_BRCA.IlluminaGA\_DNASeq.Level\_2.5.0.0 -- TCGA-AN-A0XN\_D

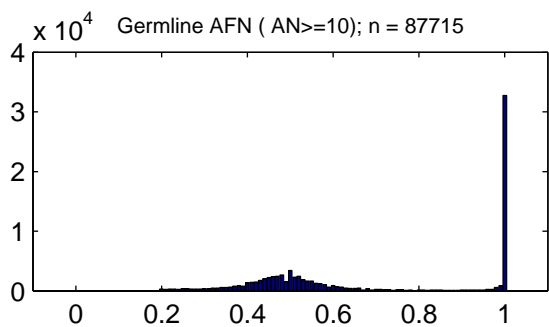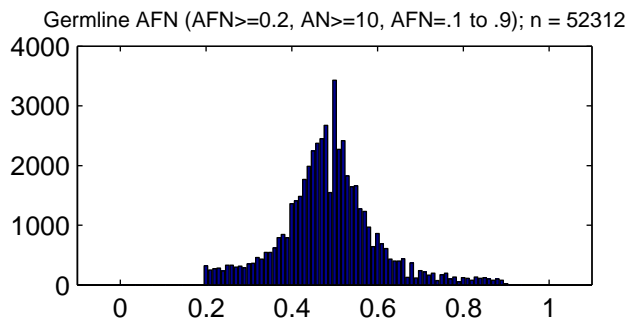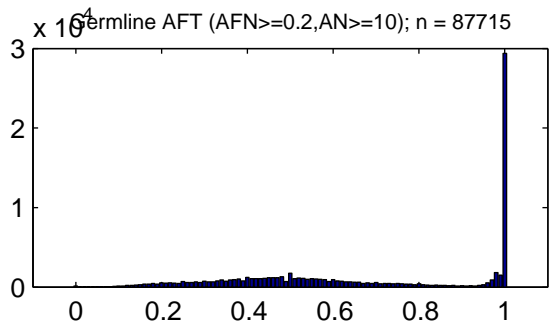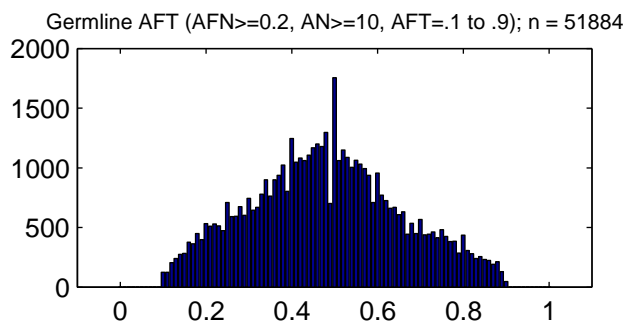

153\_ucsc.edu\_BRCA.IlluminaGA\_DNASeq.Level\_2.4.0.0 -- TCGA-A8-A09E\_W

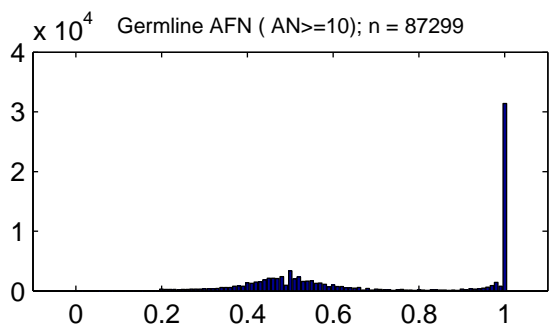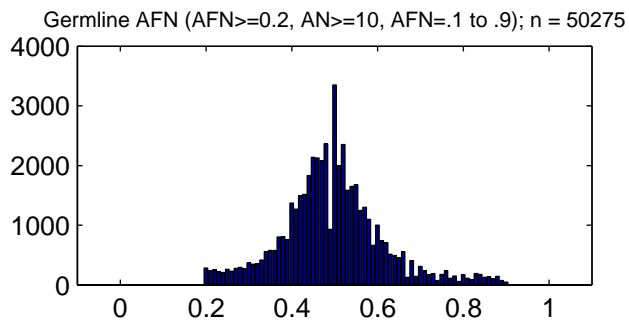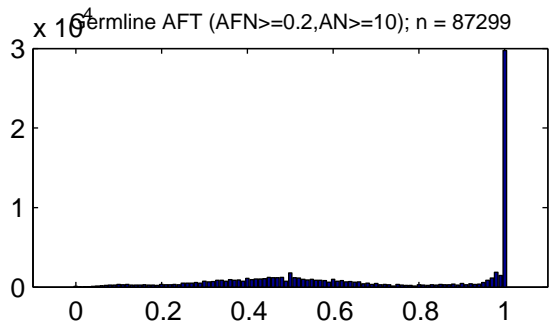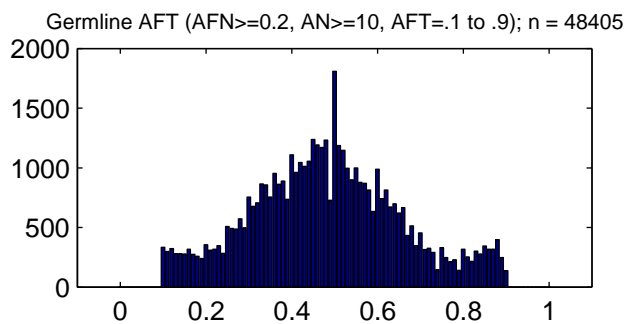

154\_ucsc.edu\_BRCA.IlluminaGA\_DNASeq.Level\_2.14.0.0 -- TCGA-A2-A0ET\_V

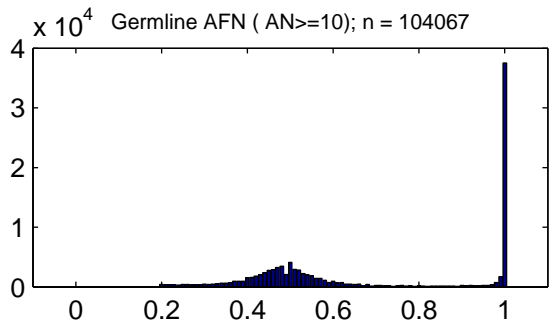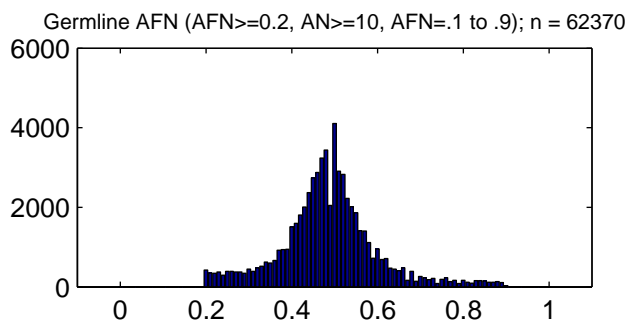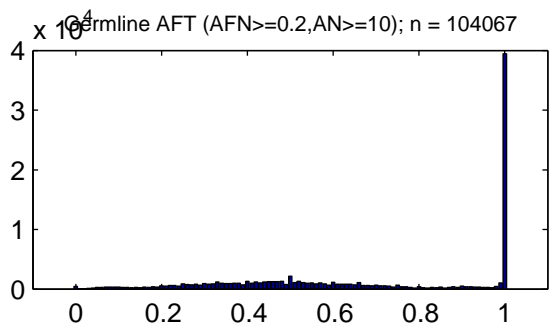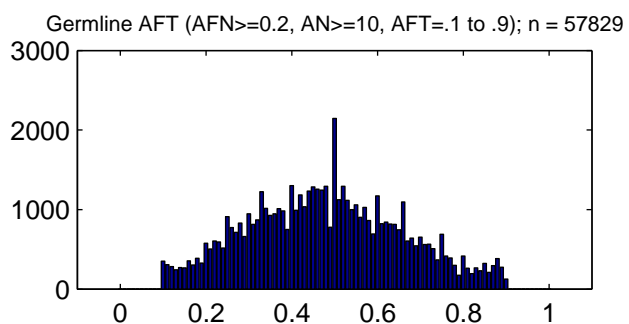

155\_ucsc.edu\_BRCA.IlluminaGA\_DNASeq.Level\_2.4.0.0 -- TCGA-A8-A093\_W

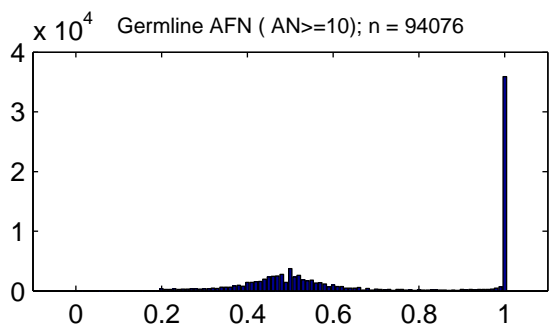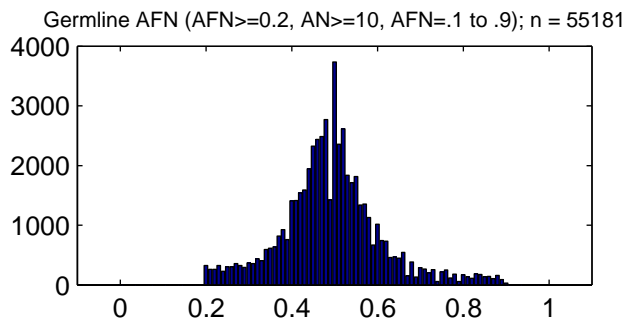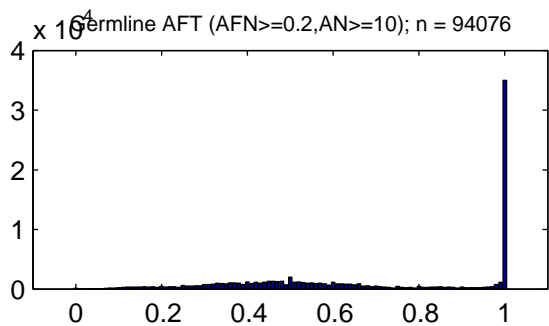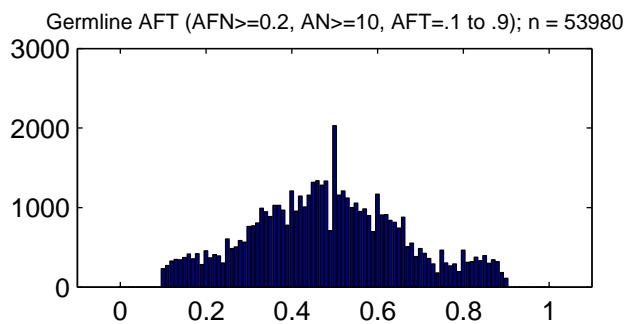

156\_ucsc.edu\_BRCA.IlluminaGA\_DNASeq.Level\_2.4.0.0 -- TCGA-A8-A06Y\_W

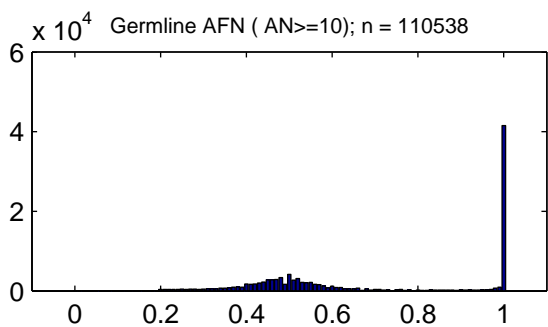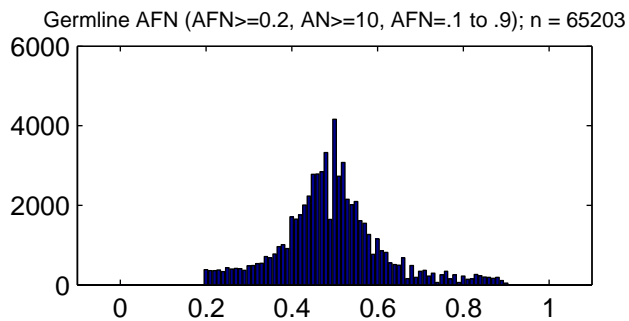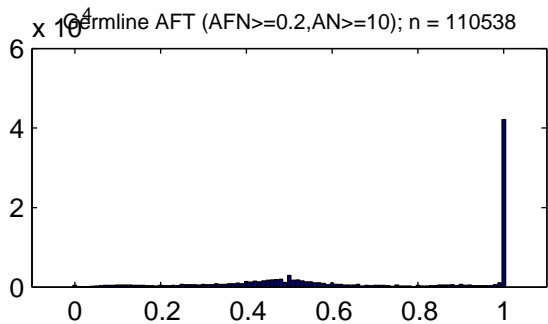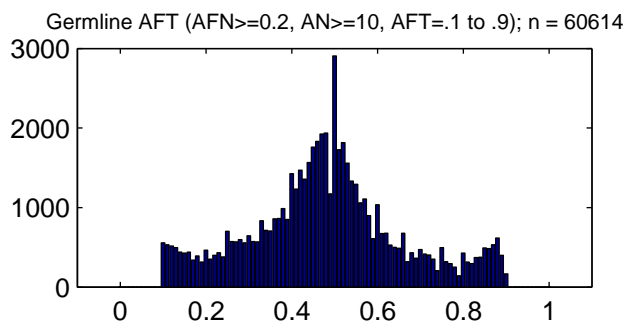

157\_ucsc.edu\_BRCA.IlluminaGA\_DNASeq.Level\_2.11.0.0 -- TCGA-C8-A1HG\_I

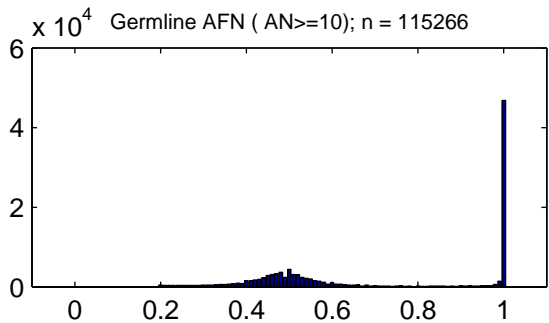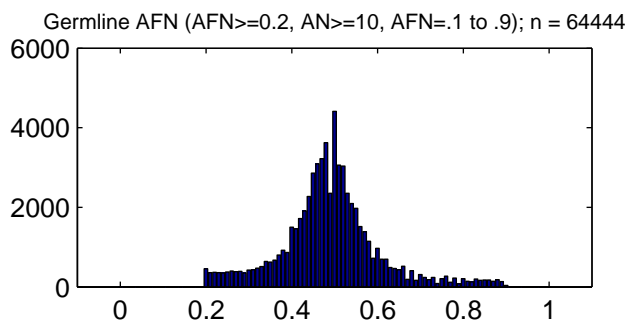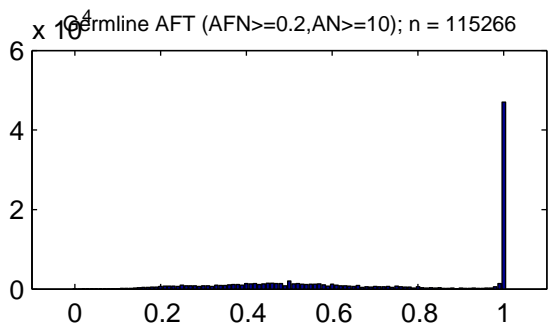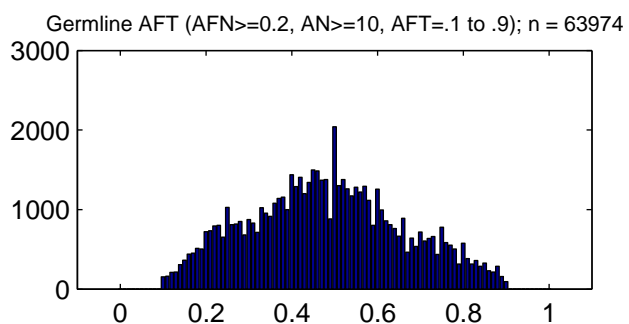

158\_ucsc.edu\_BRCA.IlluminaGA\_DNASeq.Level\_2.3.0.0 -- TCGA-A7-A0CD\_W

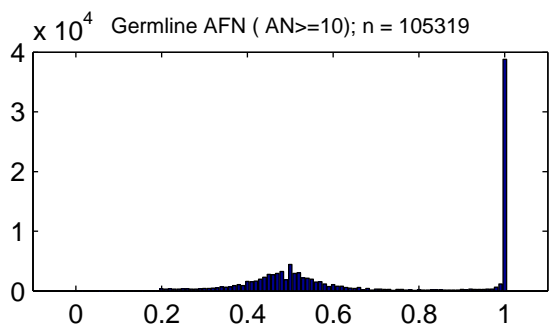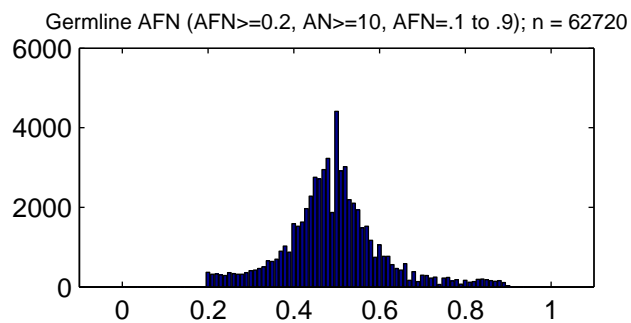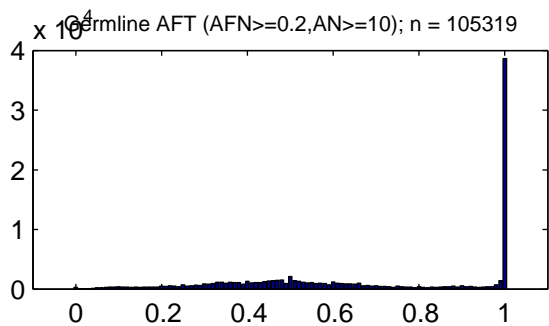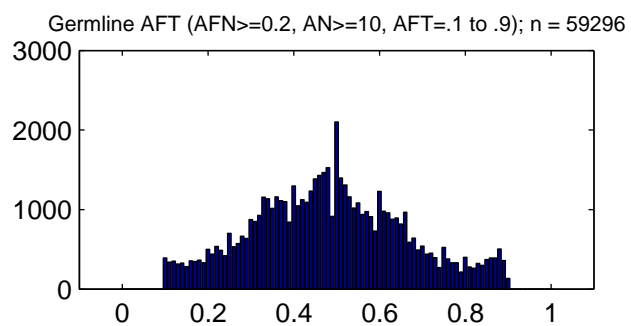

159\_ucsc.edu\_BRCA.IlluminaGA\_DNASeq.Level\_2.6.0.0 -- TCGA-AO-A0J3\_W

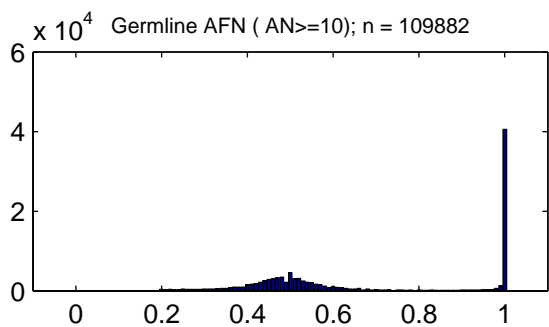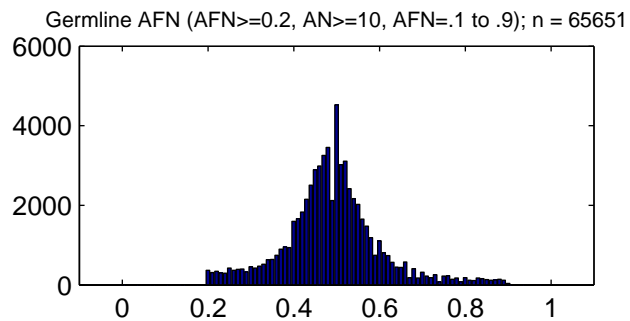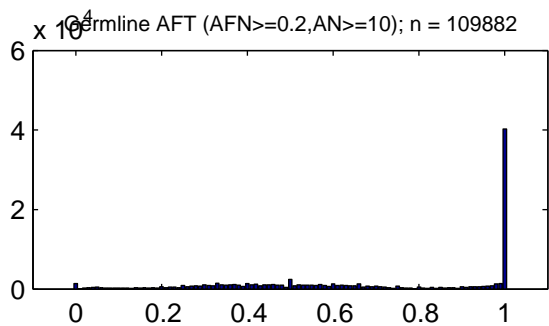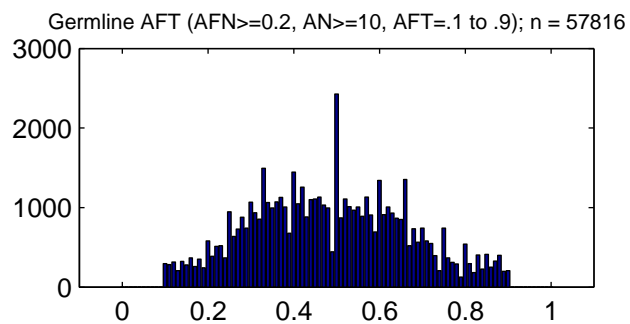



160\_ucsc.edu\_BRCA.IlluminaGA\_DNASeq.Level\_2.4.0.0 -- TCGA-A8-A09W\_W

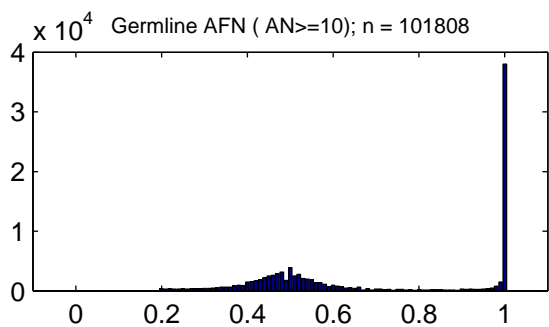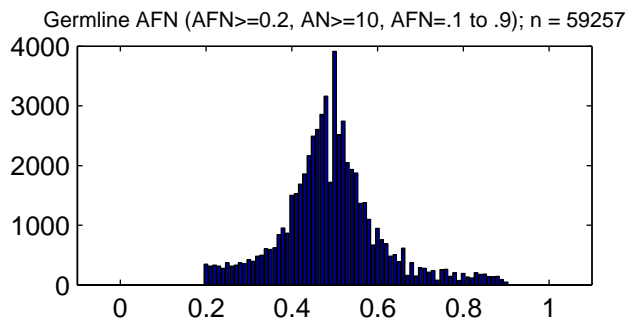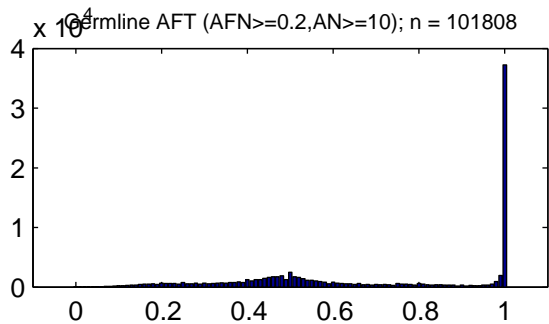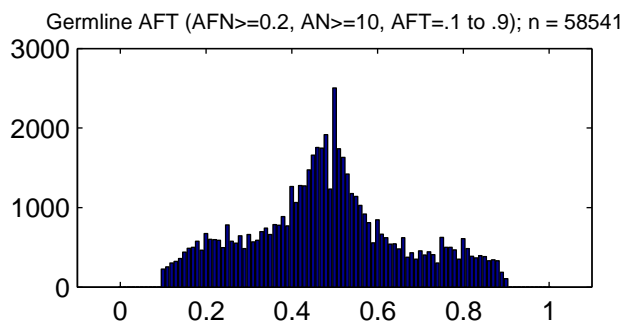

161\_ucsc.edu\_BRCA.IlluminaGA\_DNASeq.Level\_2.5.0.0 -- TCGA-AN-A0AS\_W

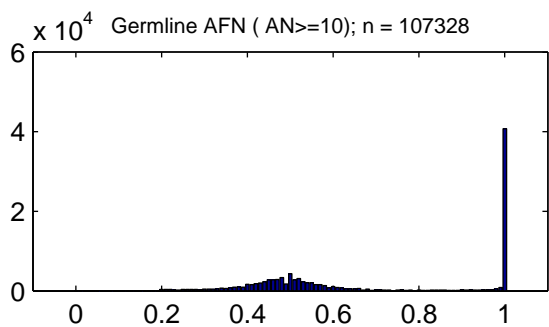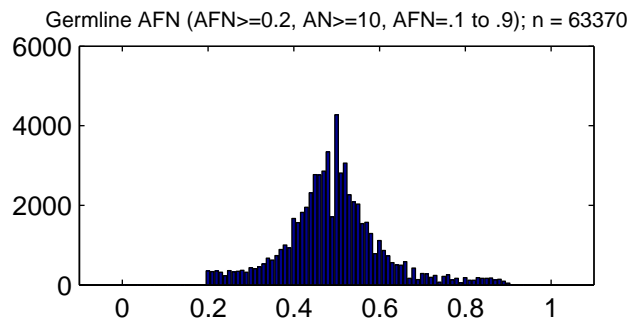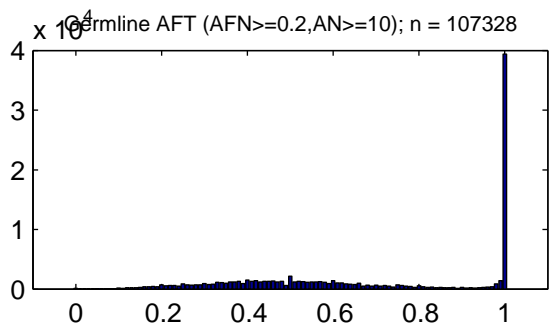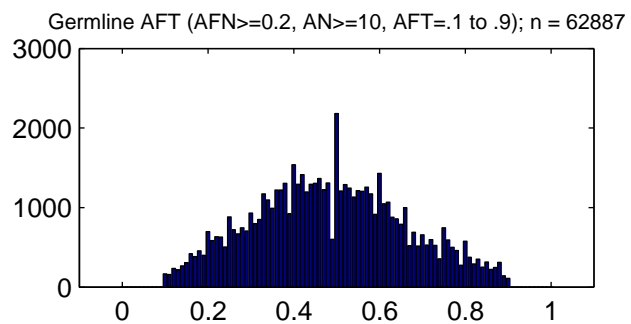

162\_ucsc.edu\_BRCA.IlluminaGA\_DNASeq.Level\_2.2.0.0 -- TCGA-A2-A0YH\_D

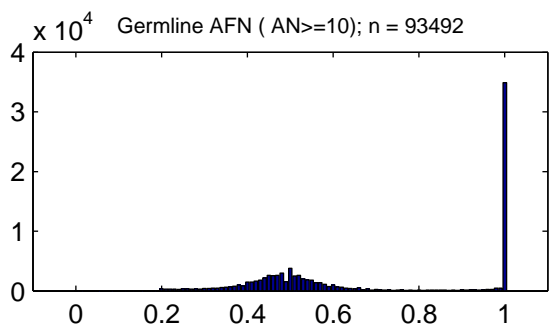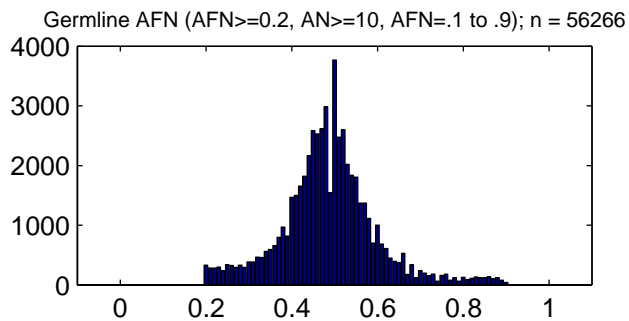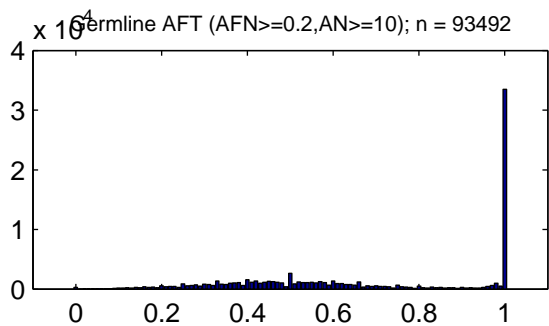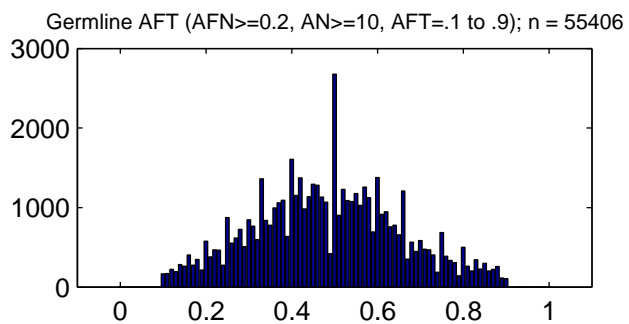

163\_ucsc.edu\_BRCA.IlluminaGA\_DNASeq.Level\_2.6.0.0 -- TCGA-AO-A03N\_D

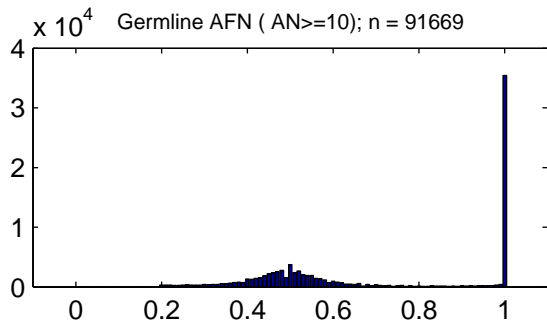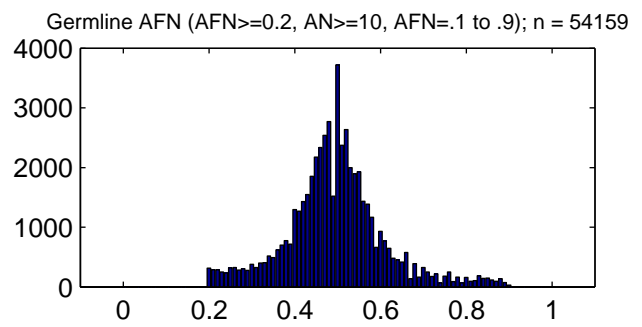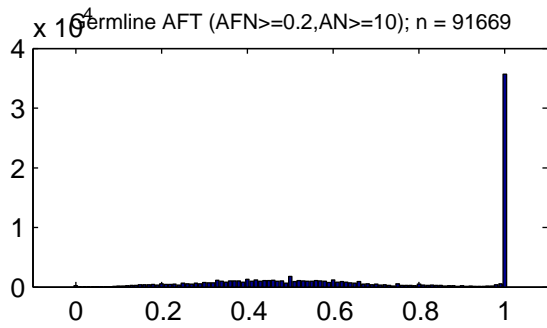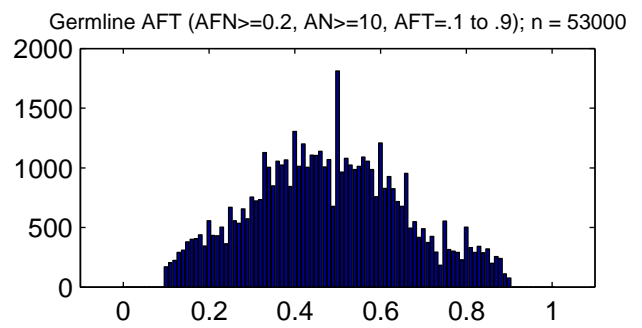

164\_ucsc.edu\_BRCA.IlluminaGA\_DNASeq.Level\_2.4.0.0 -- TCGA-A8-A08J\_W

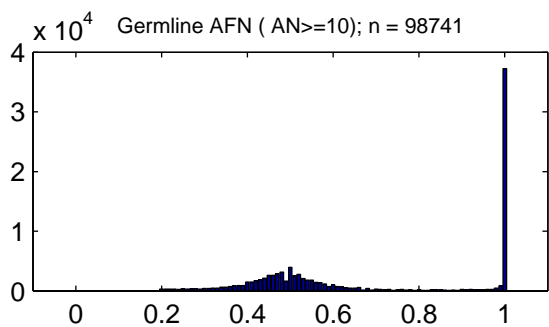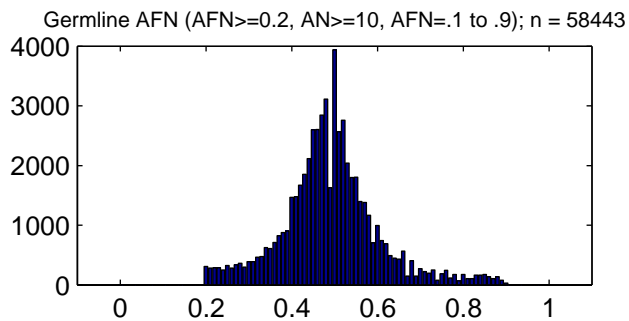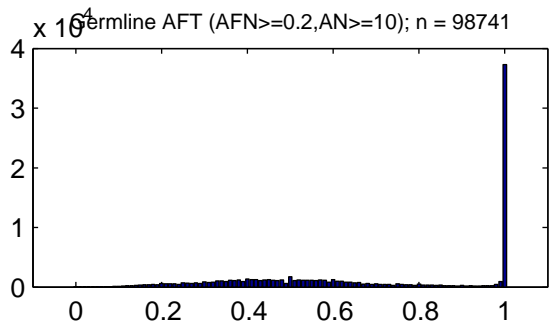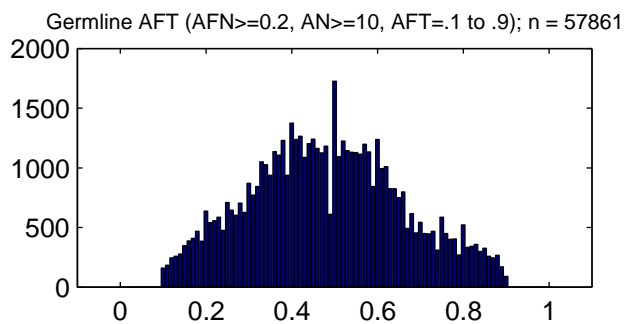

165\_ucsc.edu\_BRCA.IlluminaGA\_DNASeq.Level\_2.10.0.0 -- TCGA-BH-A0DD\_I

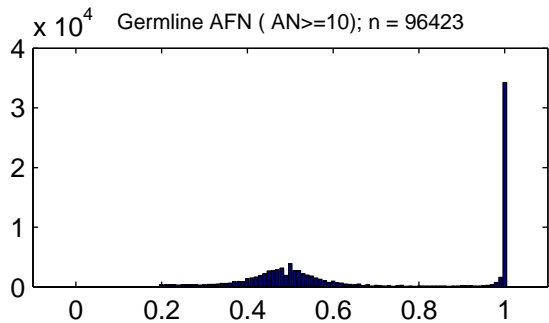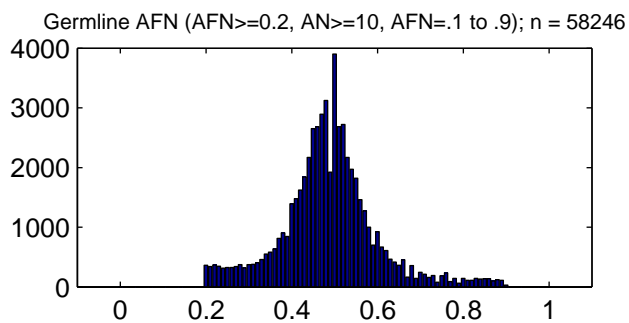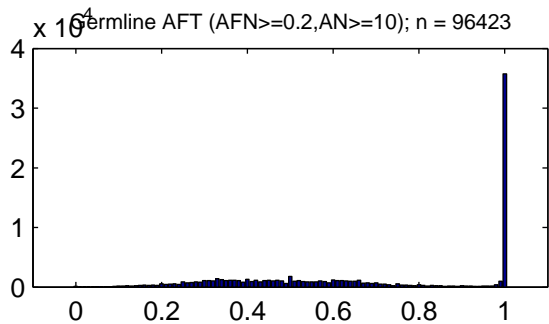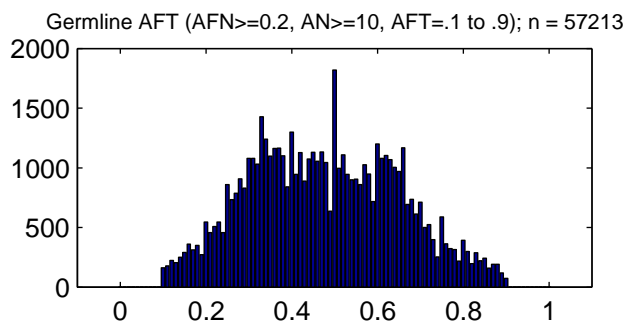

166\_ucsc.edu\_BRCA.IlluminaGA\_DNASeq.Level\_2.6.0.0 -- TCGA-AO-A128\_D

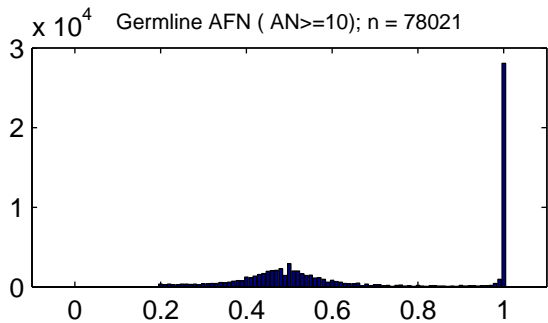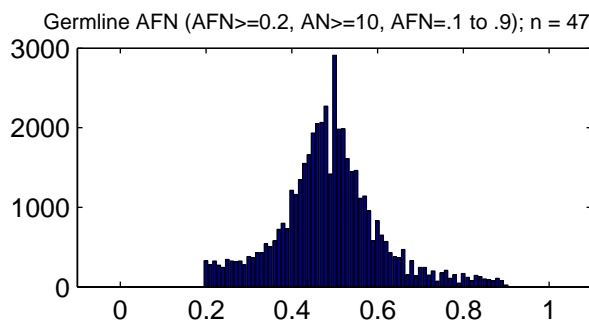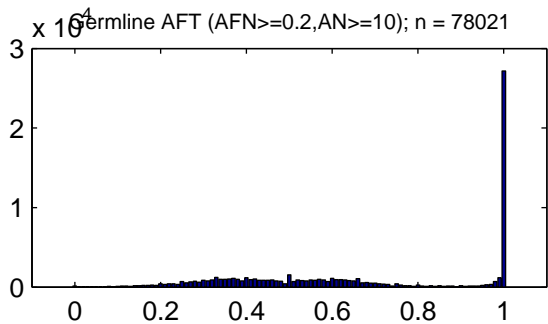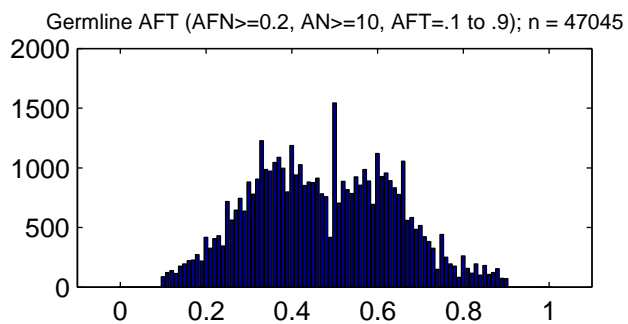

167\_ucsc.edu\_BRCA.IlluminaGA\_DNASeq.Level\_2.4.0.0 -- TCGA-A8-A09R\_W

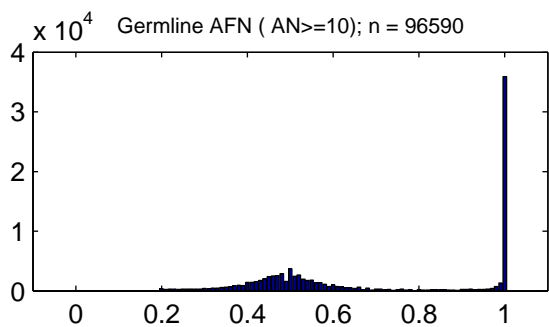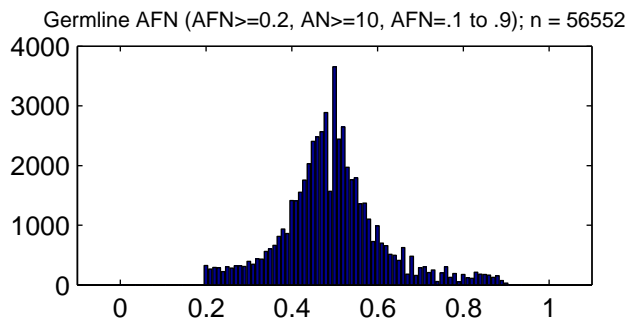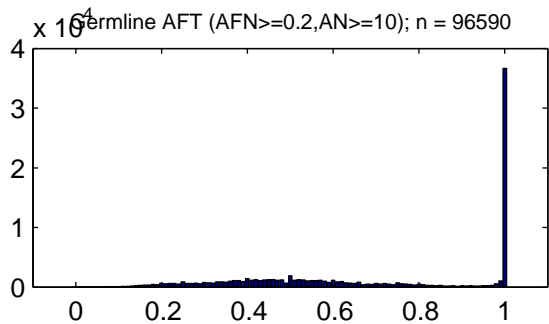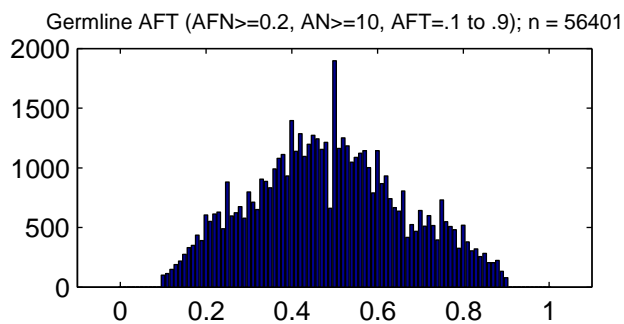



168\_ucsc.edu\_BRCA.IlluminaGA\_DNASeq.Level\_2.6.0.0 -- TCGA-AO-A0JD\_W

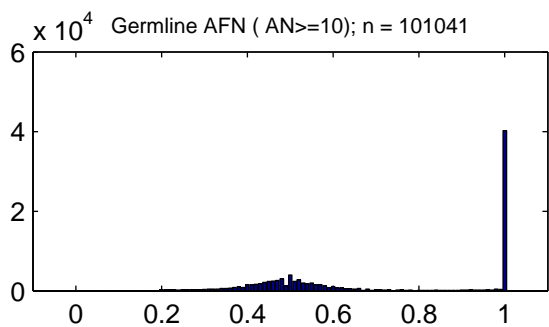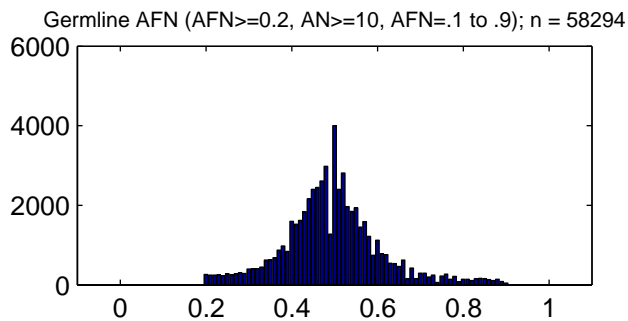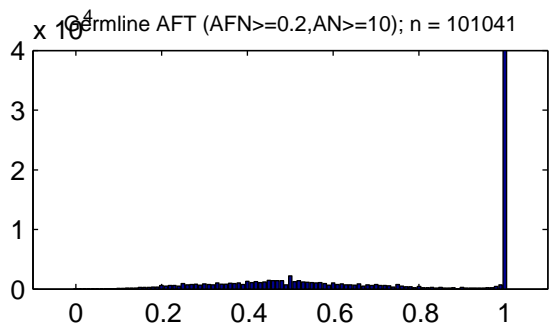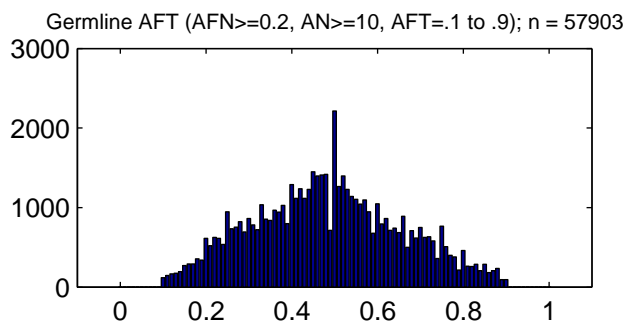

169\_ucsc.edu\_BRCA.IlluminaGA\_DNASeq.Level\_2.13.0.0 -- TCGA-E2-A15R\_C

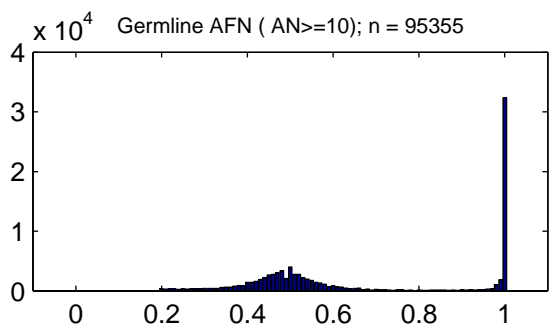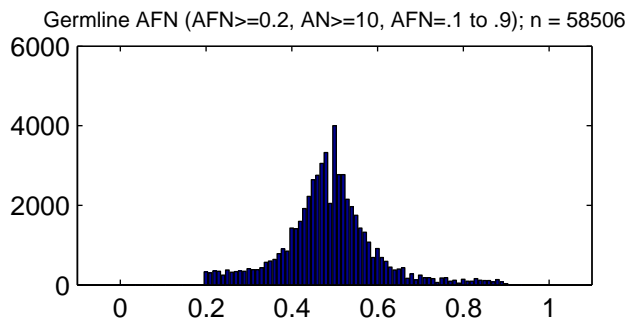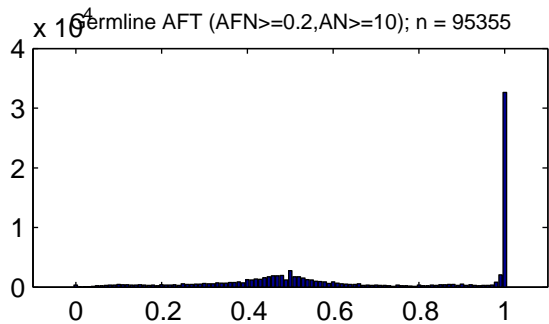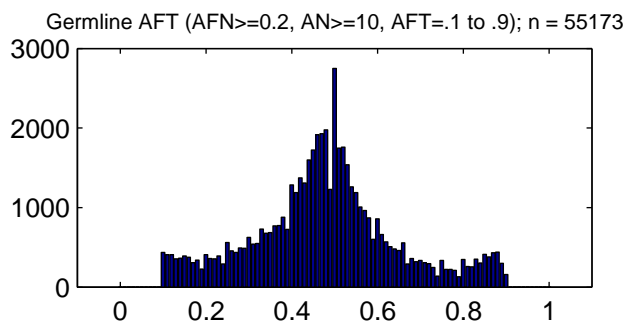

170\_ucsc.edu\_BRCA.IlluminaGA\_DNASeq.Level\_2.11.0.0 -- TCGA-C8-A12K\_C

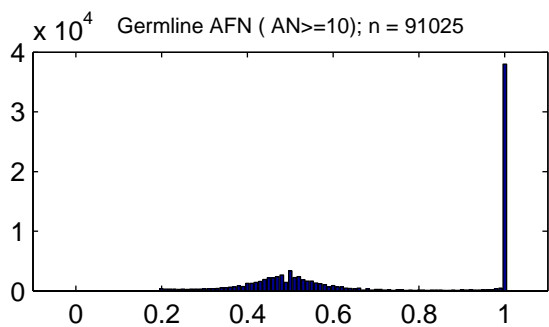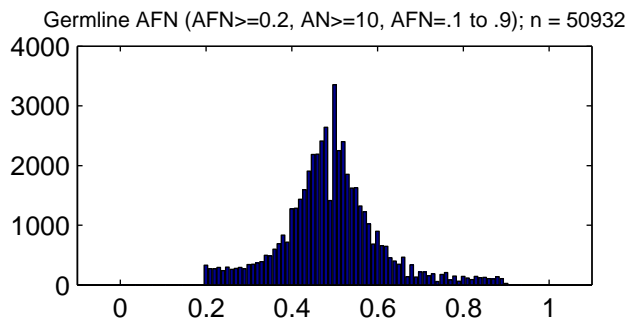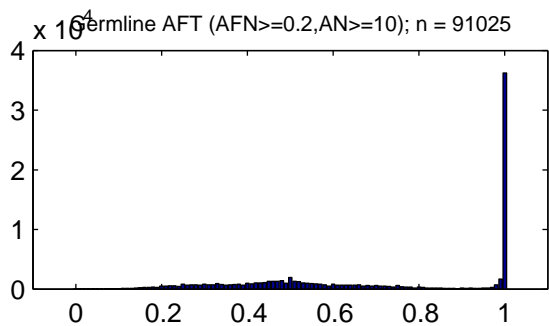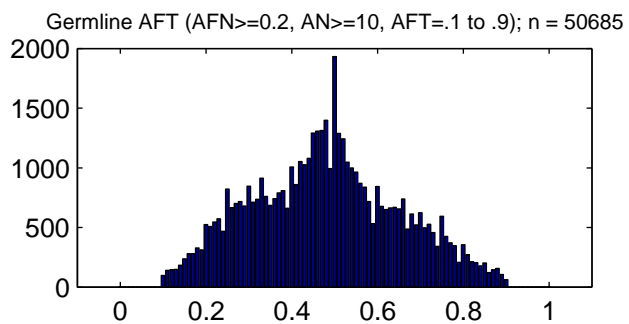

171\_ucsc.edu\_BRCA.IlluminaGA\_DNASeq.Level\_2.10.0.0 -- TCGA-BH-A18K\_C

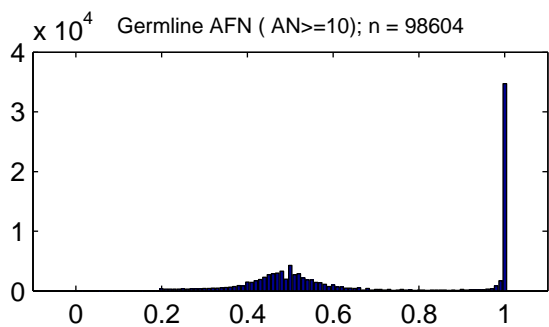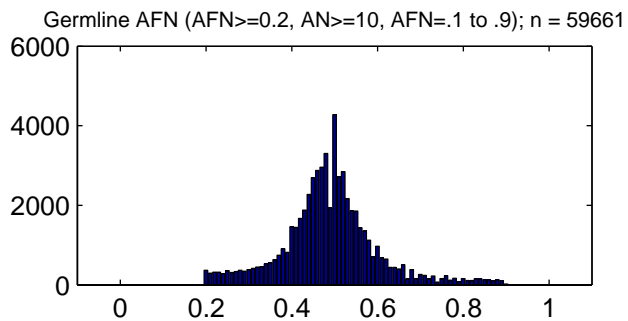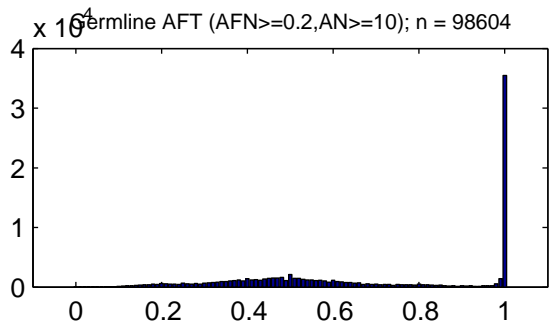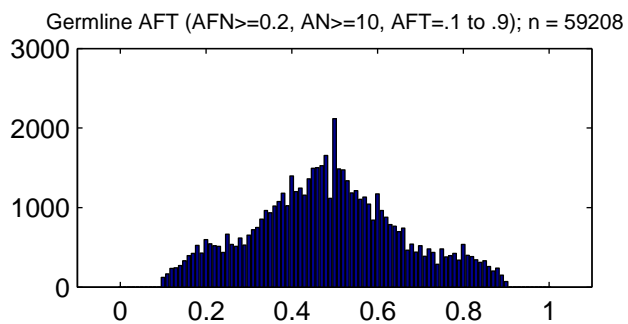

172\_ucsc.edu\_BRCA.IlluminaGA\_DNASeq.Level\_2.10.0.0 -- TCGA-BH-A0HQ\_V

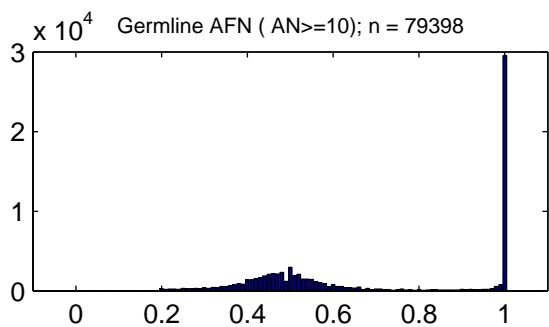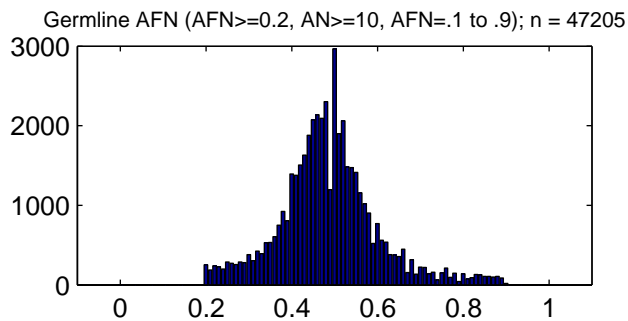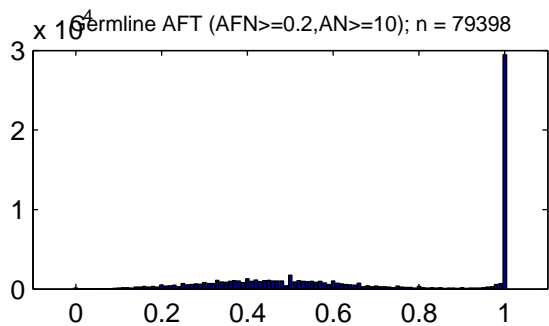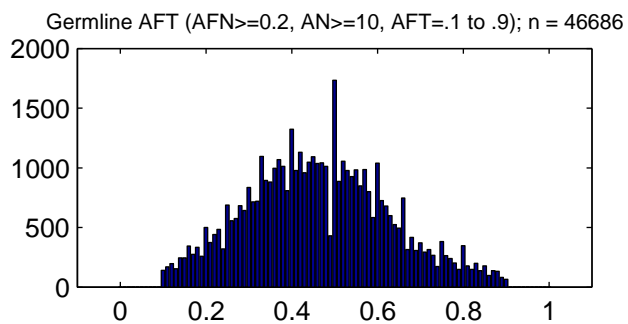

173\_ucsc.edu\_BRCA.IlluminaGA\_DNASeq.Level\_2.1.0.0 -- TCGA-A1-A0SK\_D

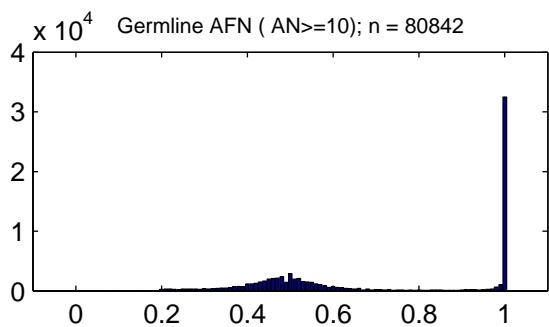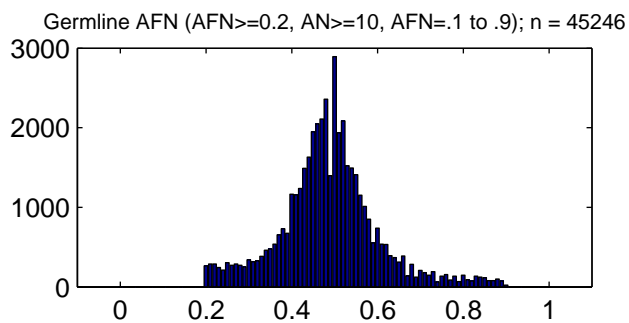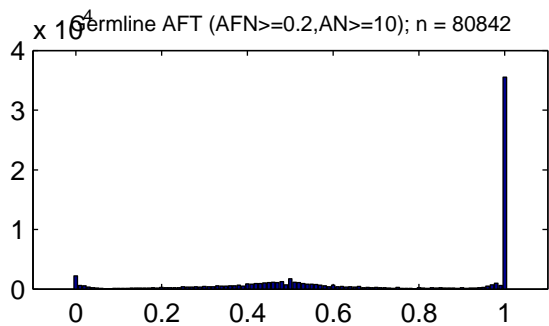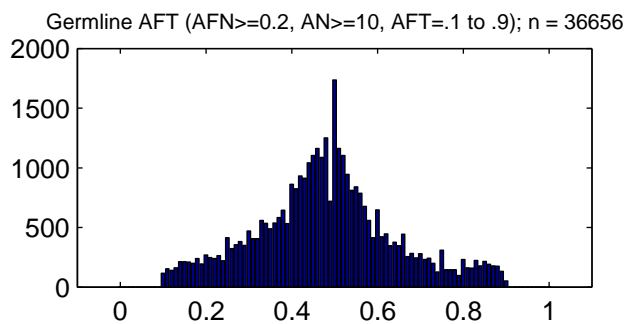

174\_ucsc.edu\_BRCA.IlluminaGA\_DNASeq.Level\_2.6.0.0 --- TCGA-AO-A0JM\_W

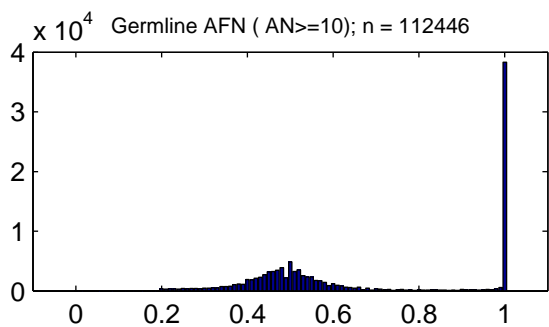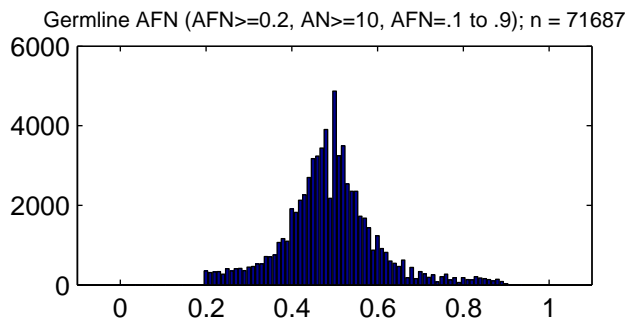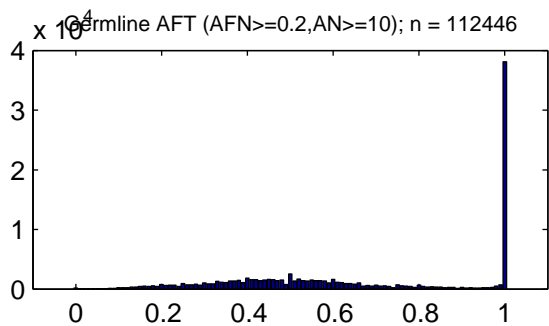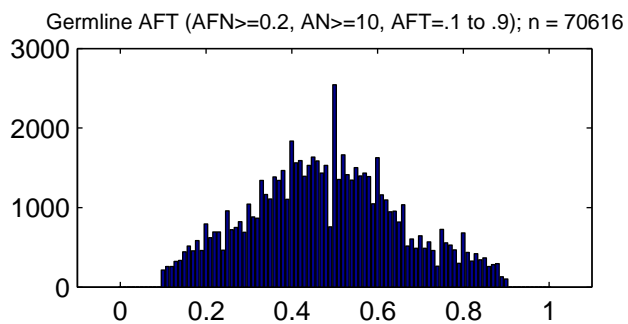

175\_ucsc.edu\_BRCA.IlluminaGA\_DNASeq.Level\_2.2.0.0 -- TCGA-A2-A0T0\_D

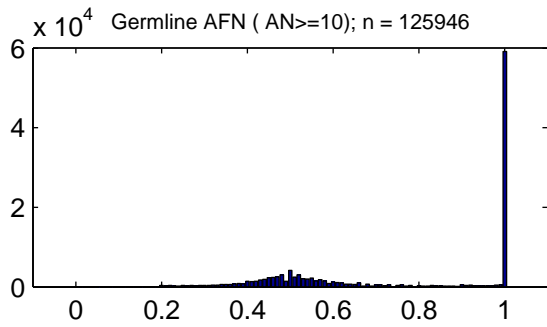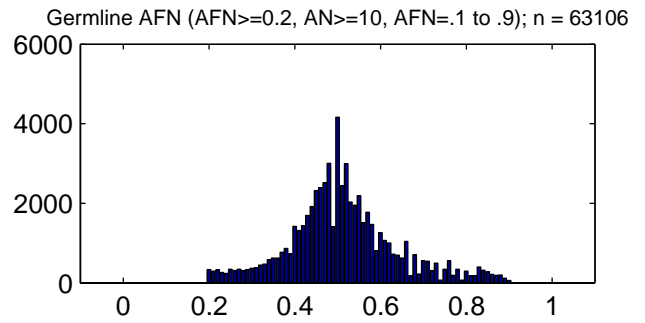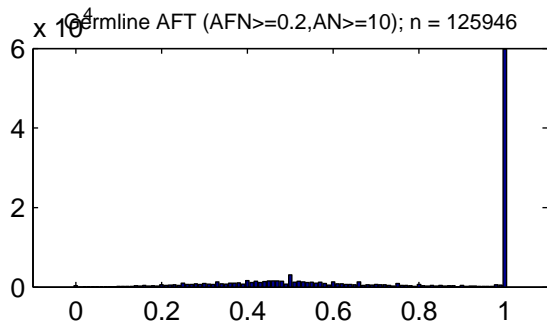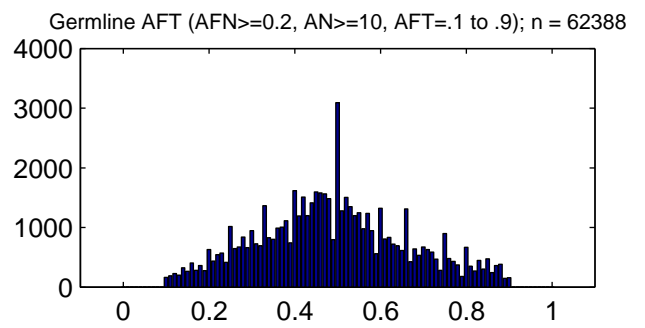



176\_ucsc.edu\_BRCA.IlluminaGA\_DNASeq.Level\_2.13.0.0 -- TCGA-E2-A155\_D

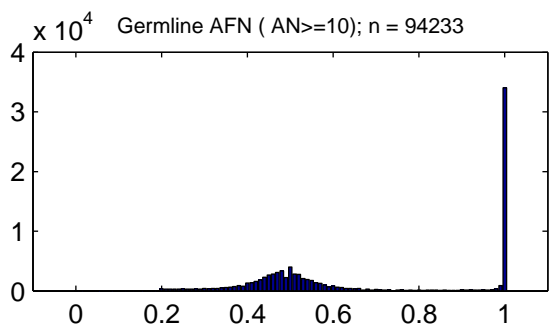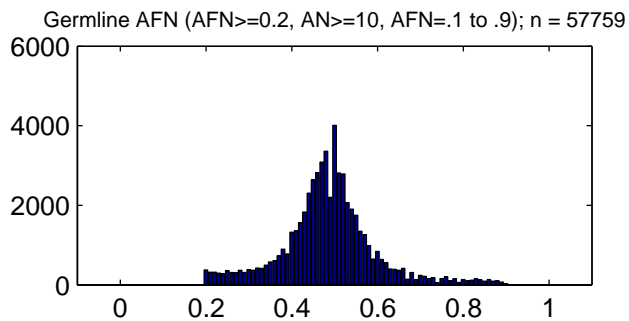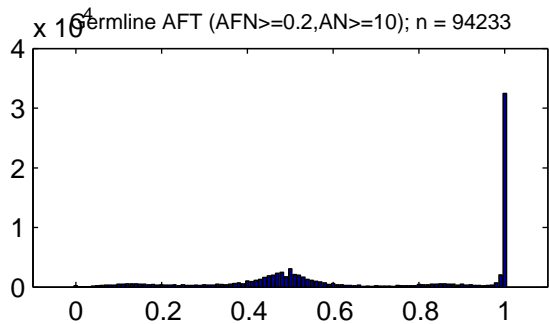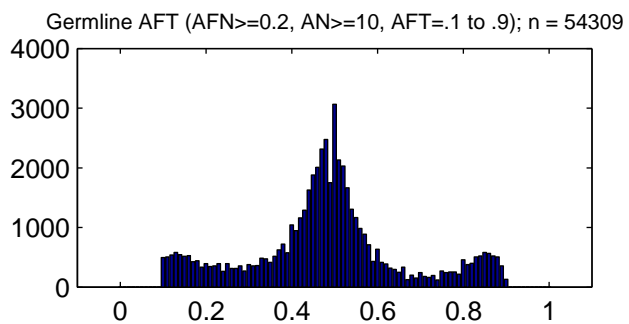

177\_ucsc.edu\_BRCA.IlluminaGA\_DNASeq.Level\_2.6.0.0 -- TCGA-AO-A03P\_W

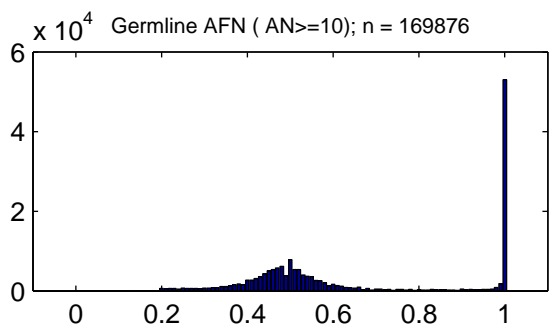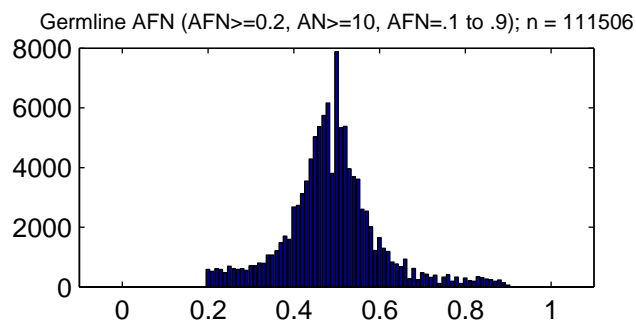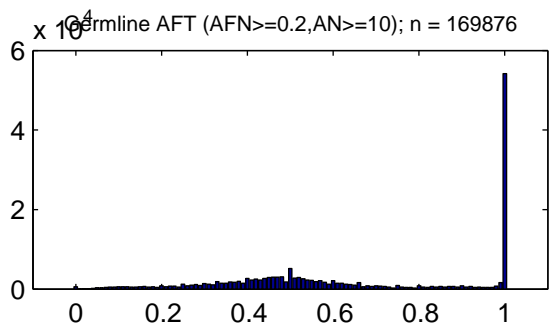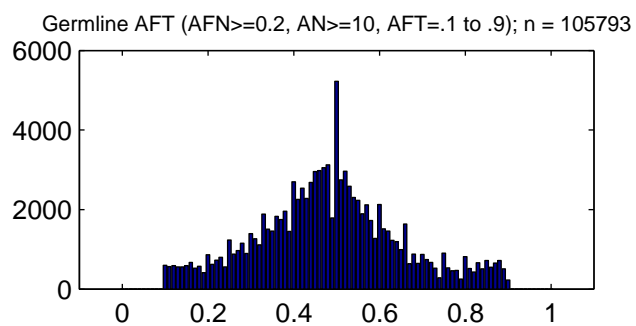

178\_ucsc.edu\_BRCA.IlluminaGA\_DNASeq.Level\_2.10.0.0 -- TCGA-BH-A0BL\_C

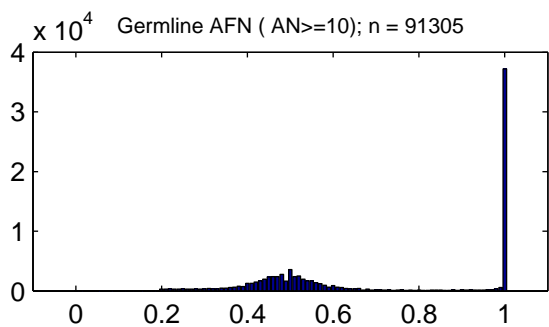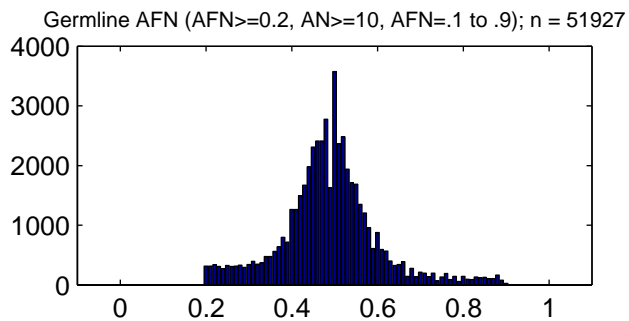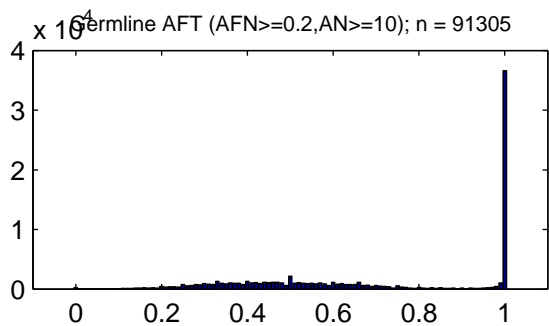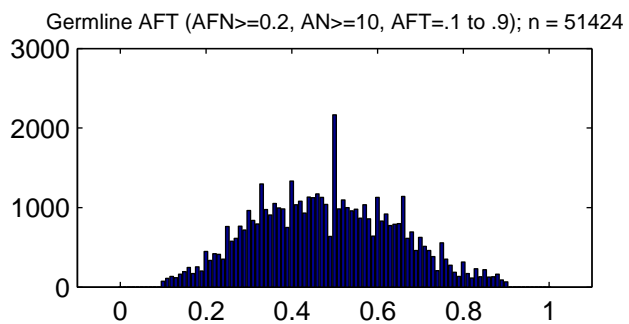

179\_ucsc.edu\_BRCA.IlluminaGA\_DNASeq.Level\_2.4.0.0 -- TCGA-A8-A076\_W

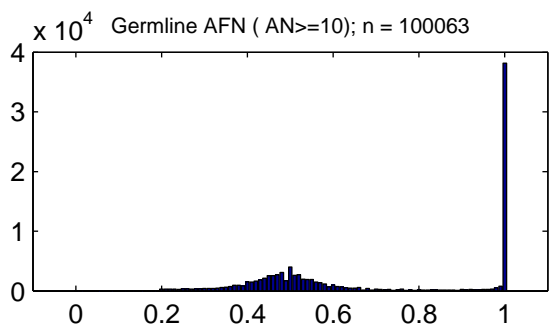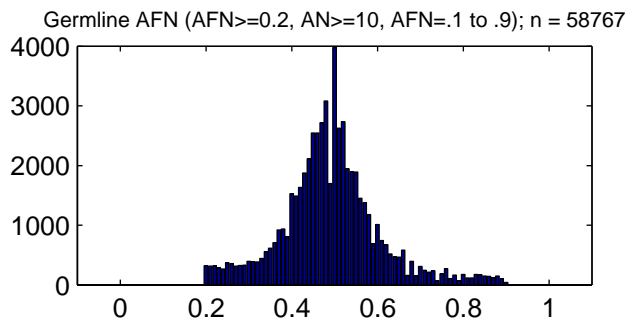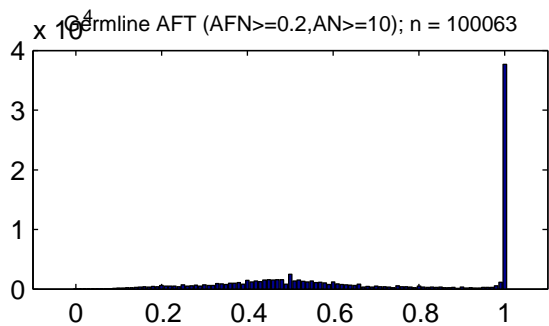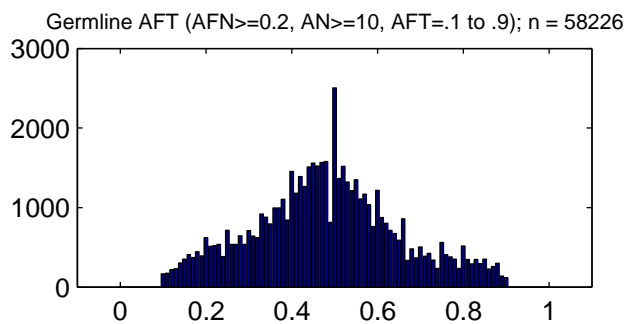

180\_ucsc.edu\_BRCA.IlluminaGA\_DNASeq.Level\_2.11.0.0 -- TCGA-C8-A138\_D

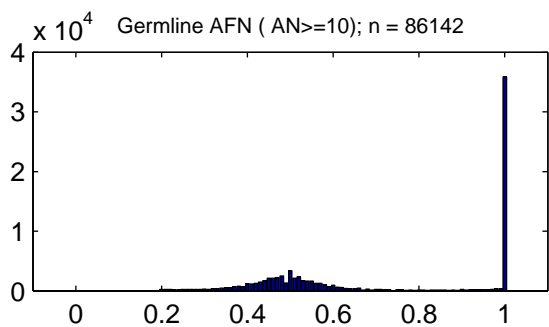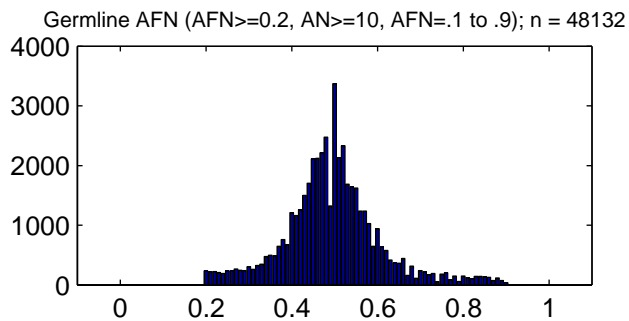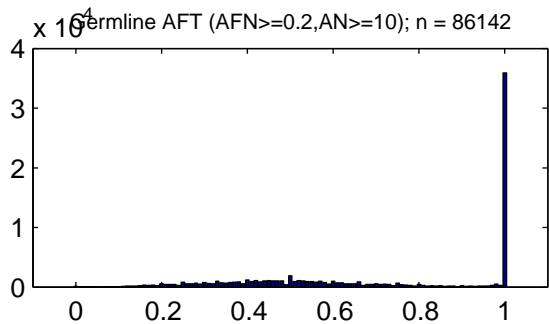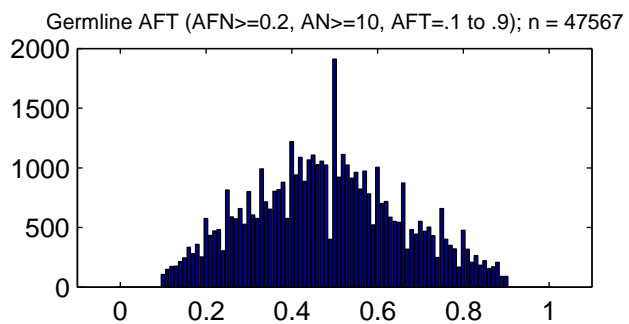

181\_ucsc.edu\_BRCA.IlluminaGA\_DNASeq.Level\_2.4.0.0 -- TCGA-A8-A08G\_W

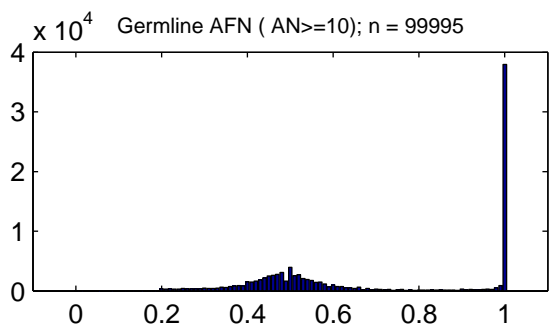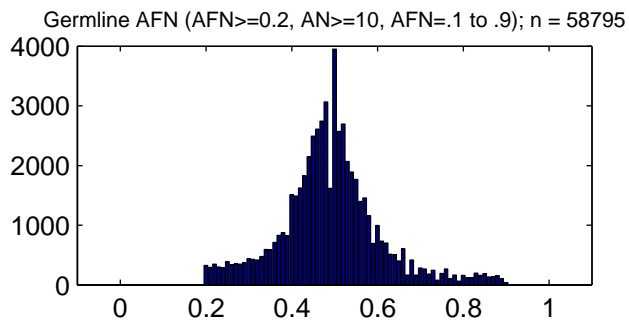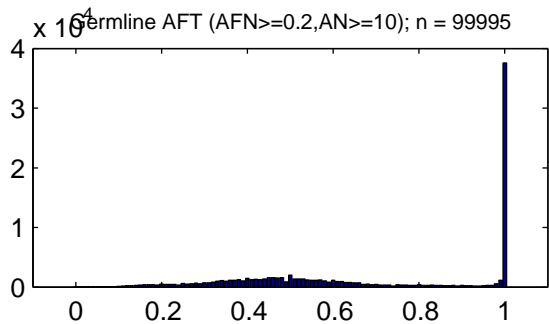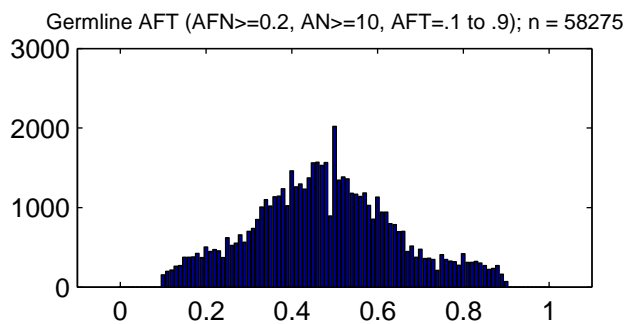

182\_ucsc.edu\_BRCA.IlluminaGA\_DNASeq.Level\_2.2.0.0 -- TCGA-A2-A0YD\_D

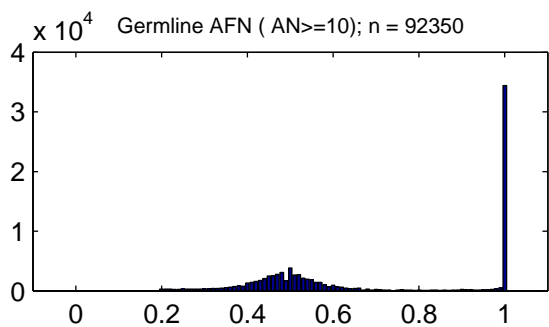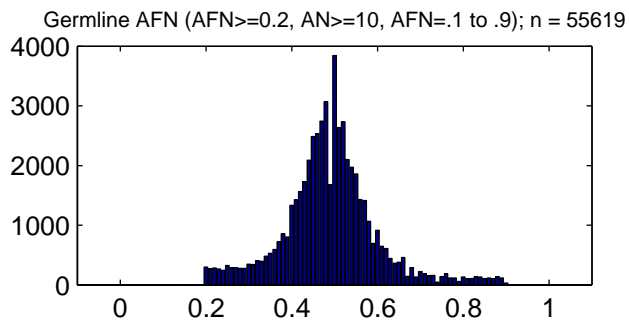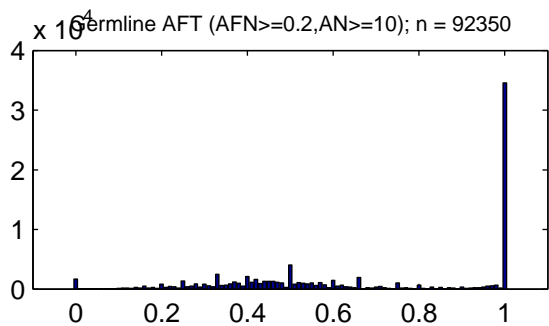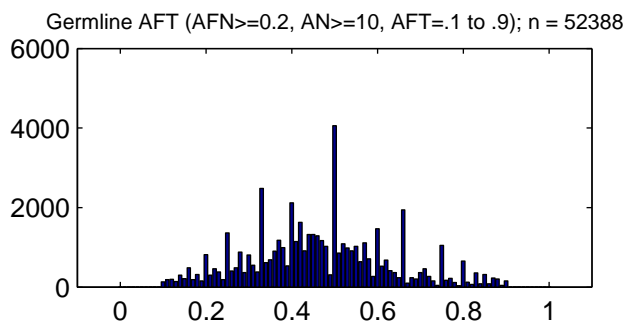

183\_ucsc.edu\_BRCA.IlluminaGA\_DNASeq.Level\_2.2.0.0 -- TCGA-A2-A0CU\_W

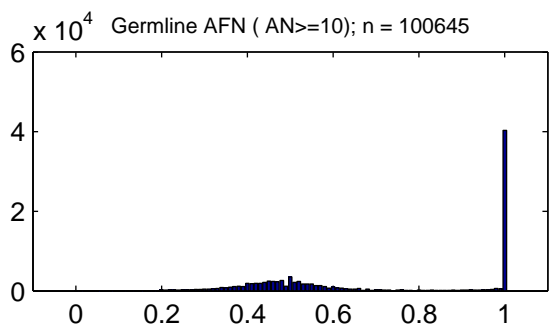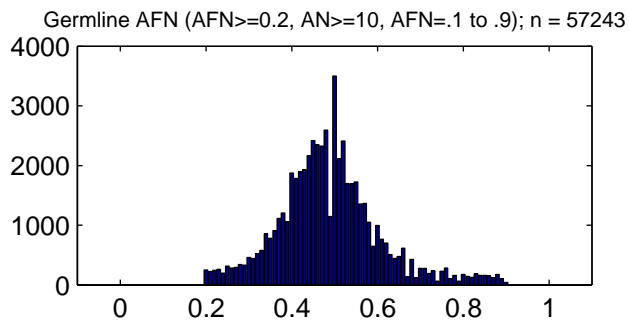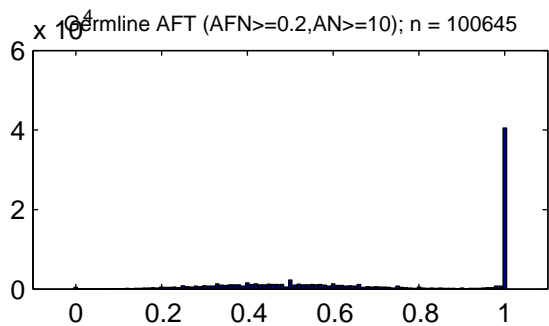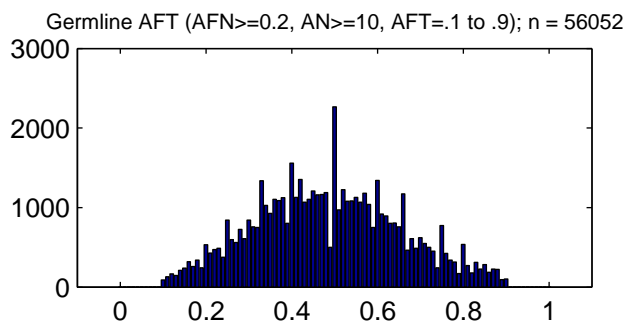



184\_ucsc.edu\_BRCA.IlluminaGA\_DNASeq.Level\_2.6.0.0 -- TCGA-AO-A03V\_D

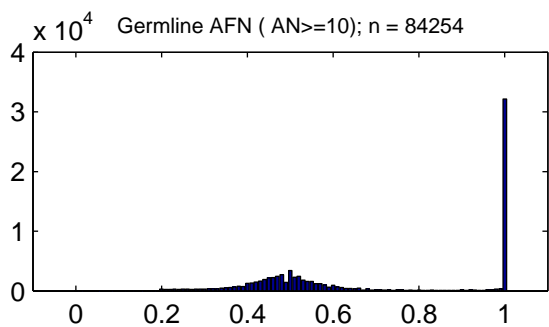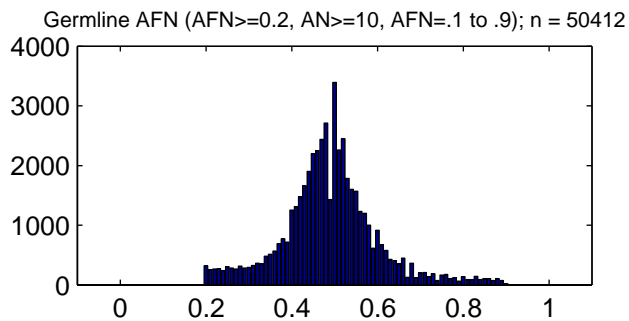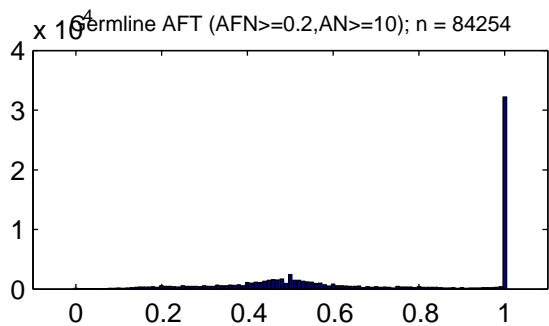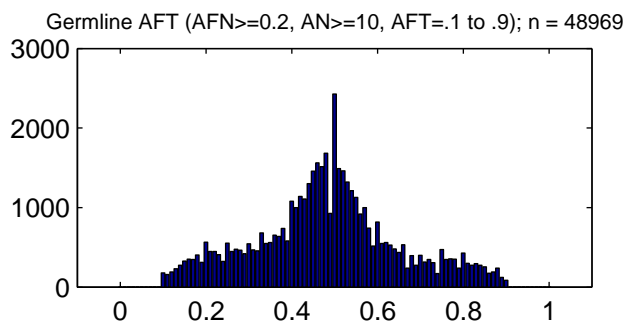

185\_ucsc.edu\_BRCA.IlluminaGA\_DNASeq.Level\_2.14.0.0 --- TCGA-A8-A097\_V

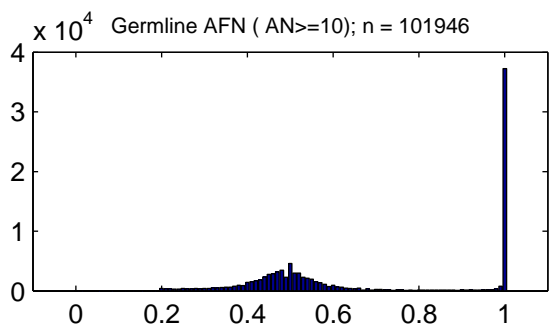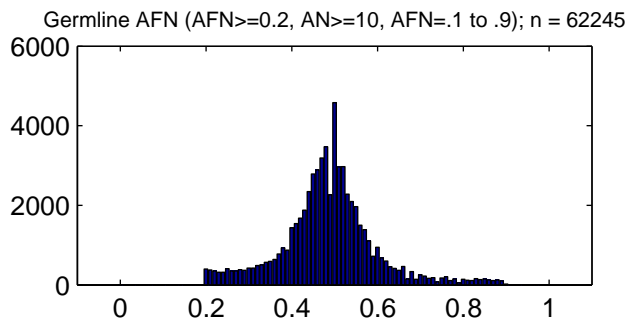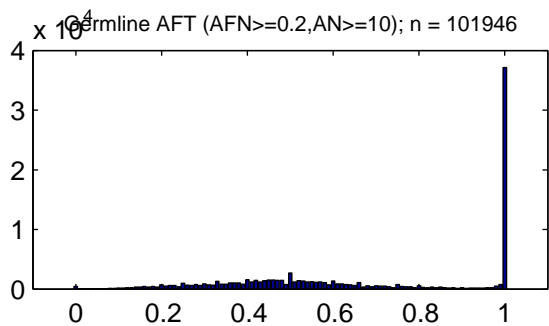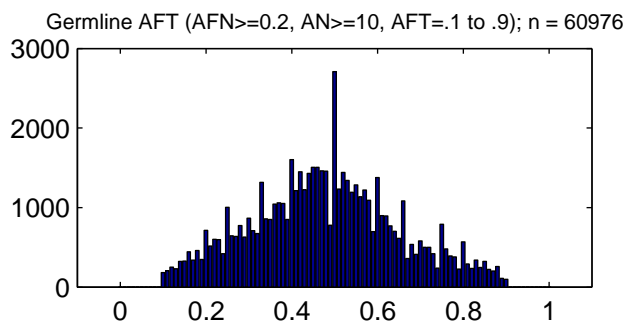

186\_ucsc.edu\_BRCA.IlluminaGA\_DNASeq.Level\_2.10.0.0 -- TCGA-BH-A0B9\_V

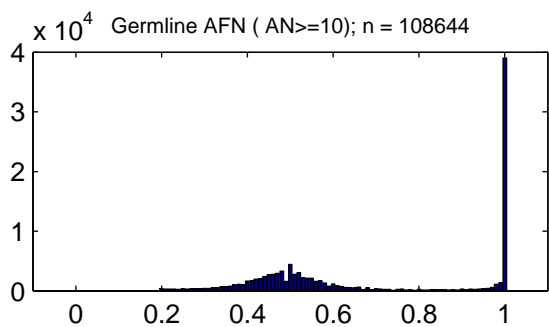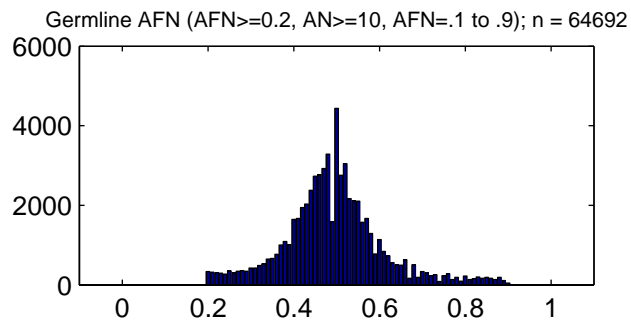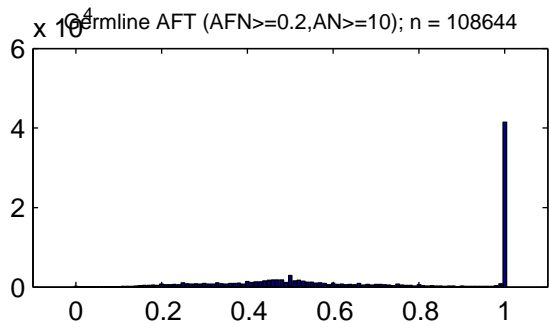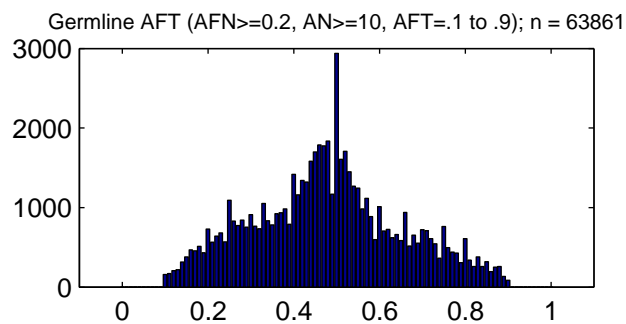

187\_ucsc.edu\_BRCA.IlluminaGA\_DNASeq.Level\_2.10.0.0 -- TCGA-BH-A0BW\_I

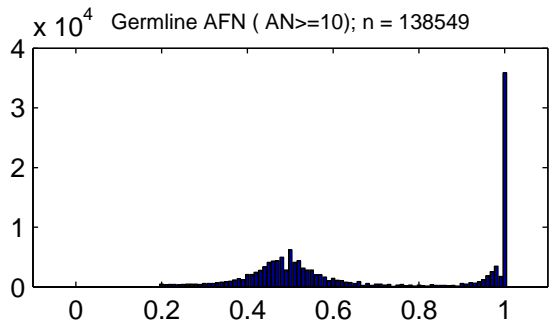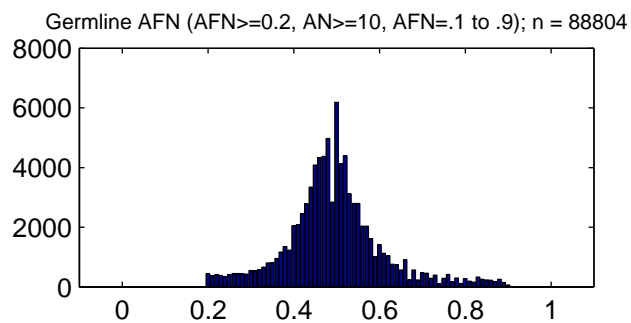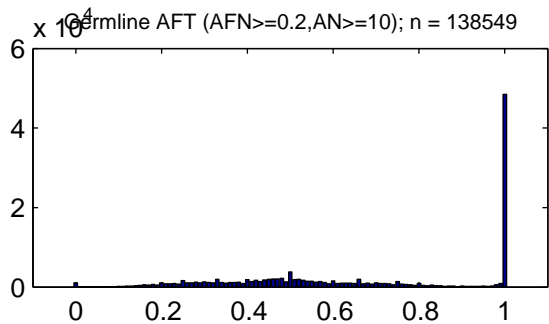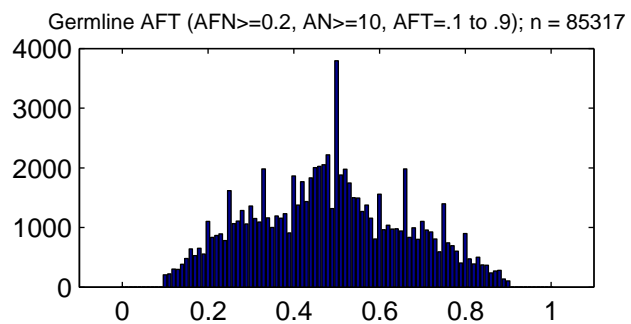

188\_ucsc.edu\_BRCA.IlluminaGA\_DNASeq.Level\_2.10.0.0 -- TCGA-BH-A0AU\_I

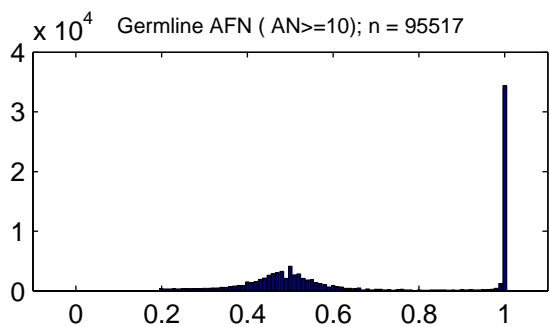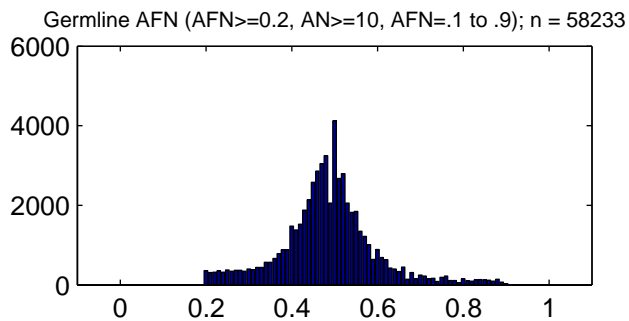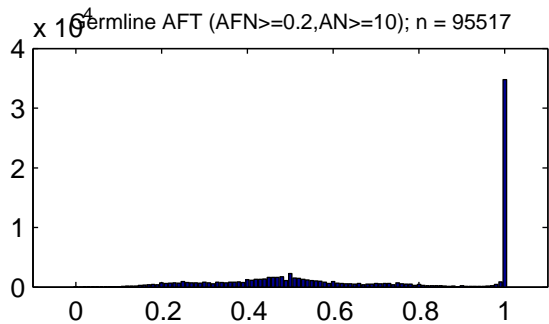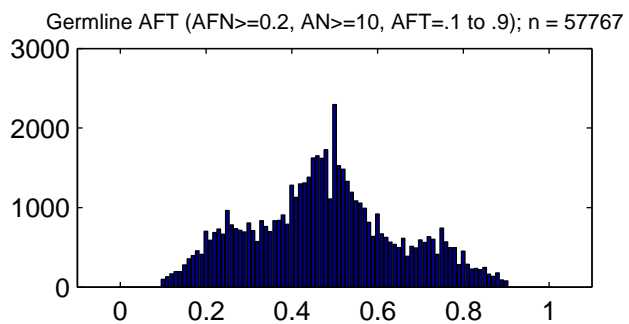

189\_ucsc.edu\_BRCA.IlluminaGA\_DNASeq.Level\_2.9.0.0 -- TCGA-B6-A0WW\_C

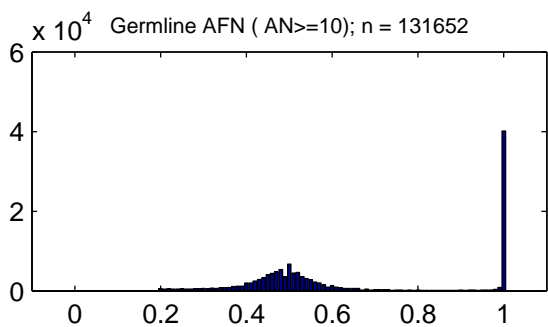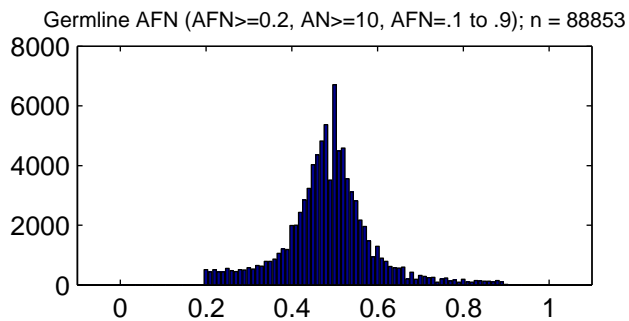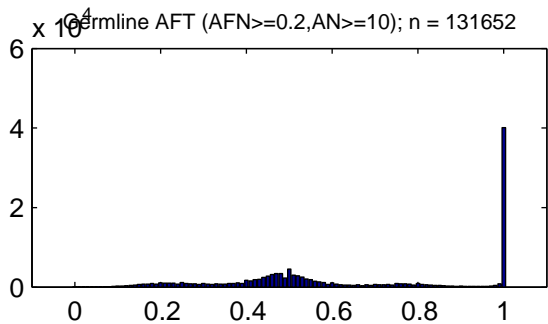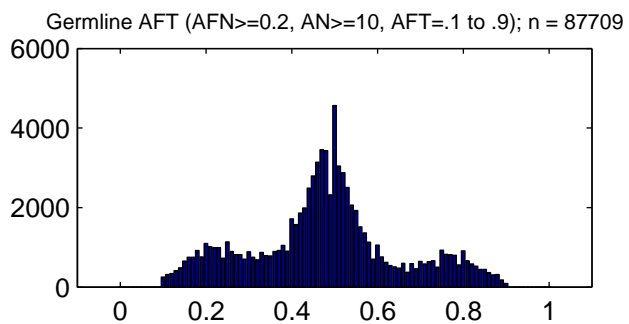

190\_ucsc.edu\_BRCA.IlluminaGA\_DNASeq.Level\_2.8.0.0 -- TCGA-AR-A0U4\_D

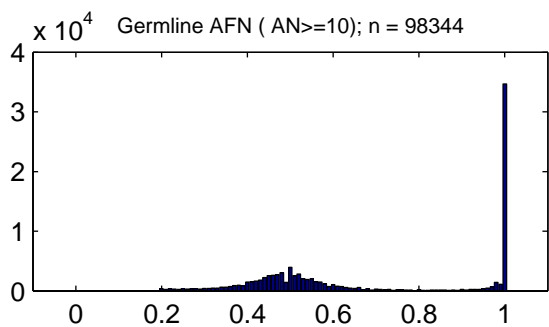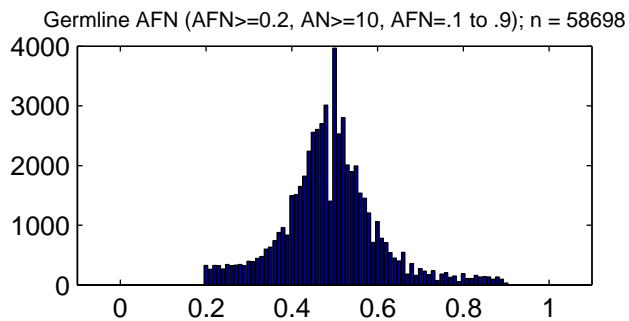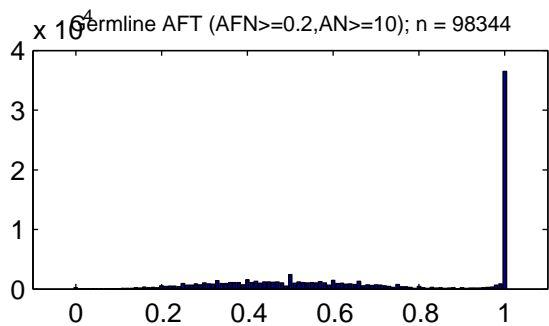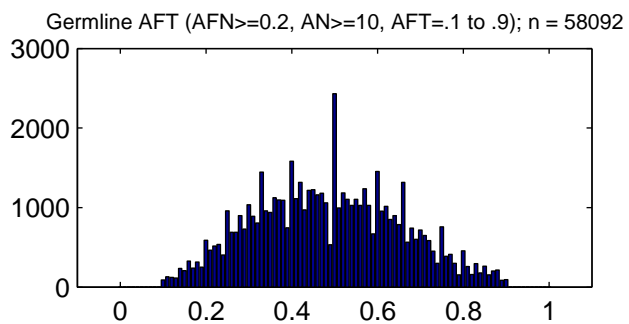

191\_ucsc.edu\_BRCA.IlluminaGA\_DNASeq.Level\_2.4.0.0 -- TCGA-A8-A09I\_W

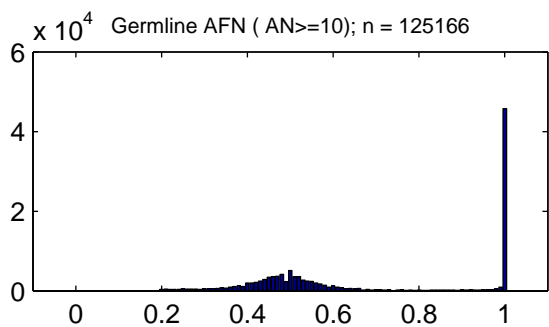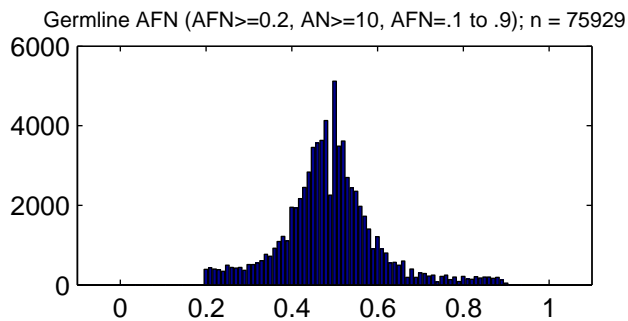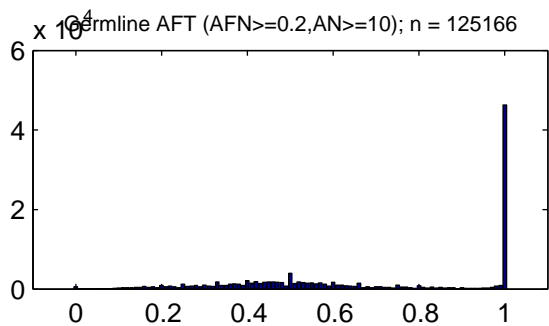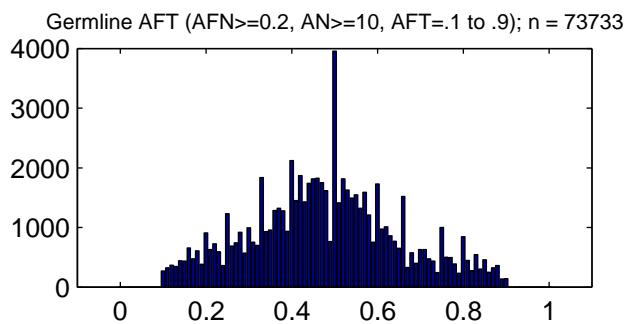



192\_ucsc.edu\_BRCA.IlluminaGA\_DNASeq.Level\_2.4.0.0 -- TCGA-A8-A06T\_W

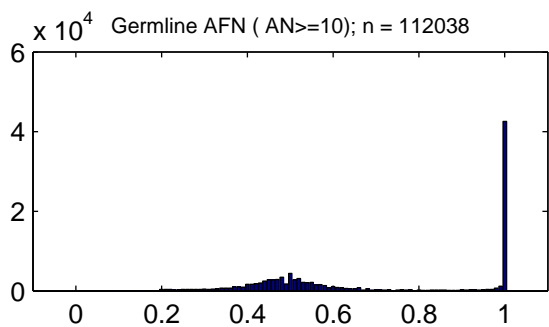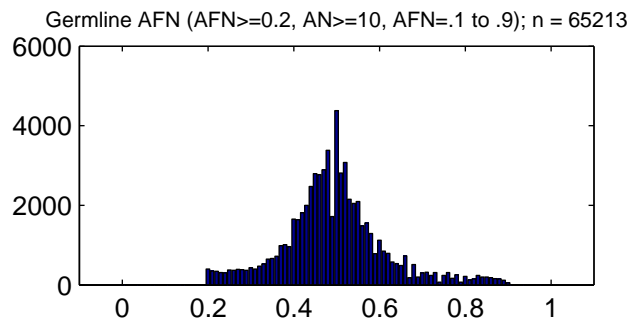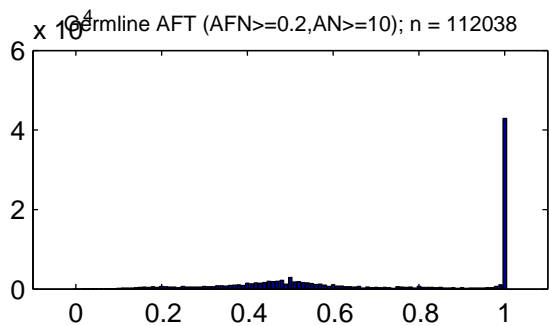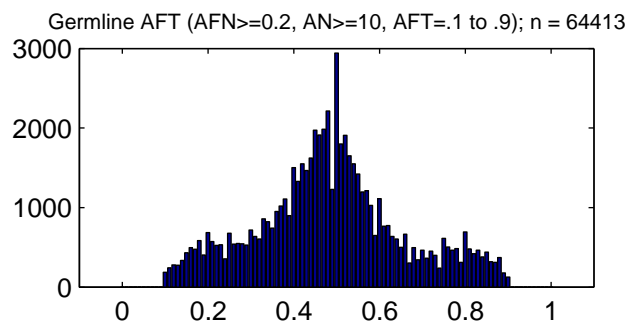

193\_ucsc.edu\_BRCA.IlluminaGA\_DNASeq.Level\_2.13.0.0 -- TCGA-E2-A14W\_C

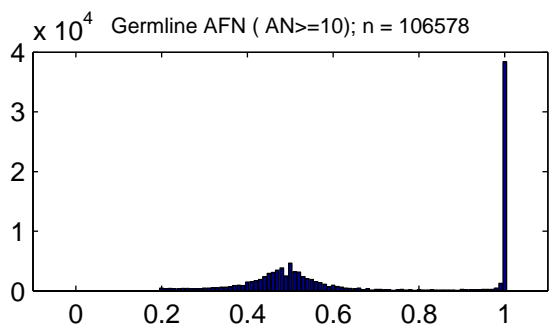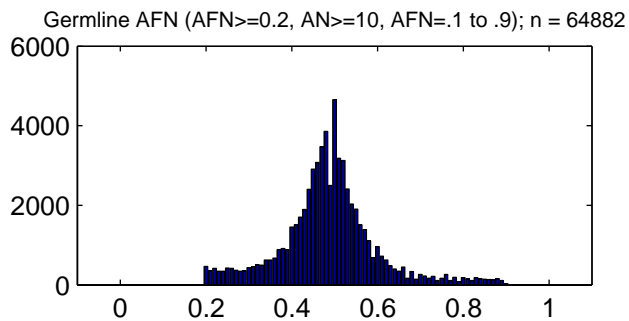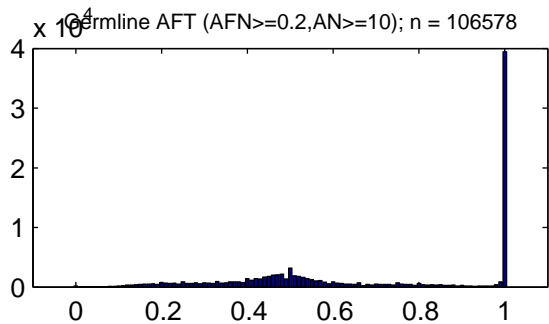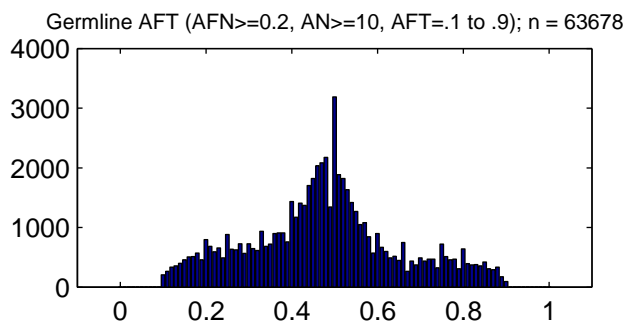

194\_ucsc.edu\_BRCA.IlluminaGA\_DNASeq.Level\_2.1.0.0 -- TCGA-A1-A0SP\_D

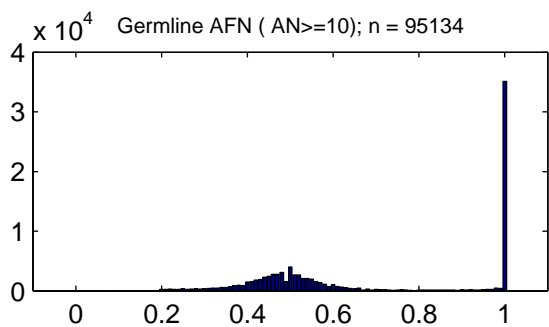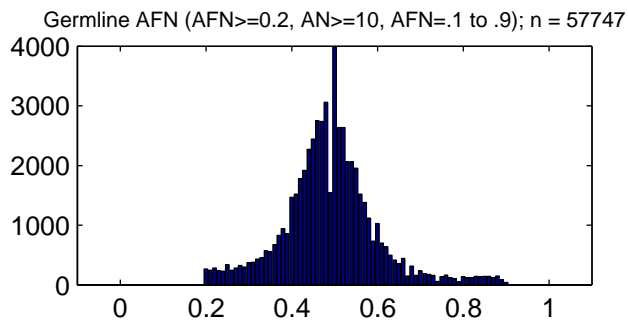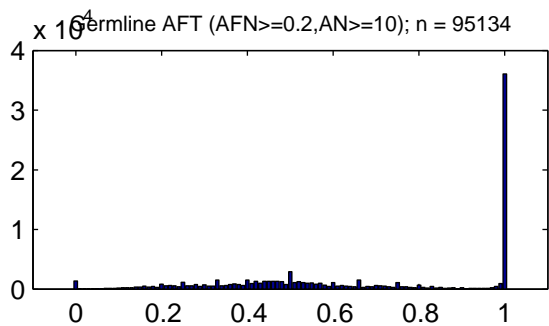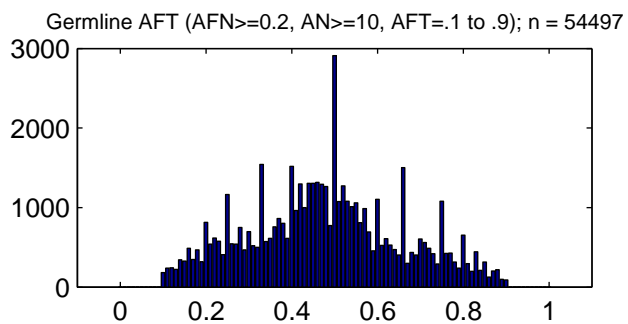

195\_ucsc.edu\_BRCA.IlluminaGA\_DNASeq.Level\_2.10.0.0 -- TCGA-BH-A1EV\_C

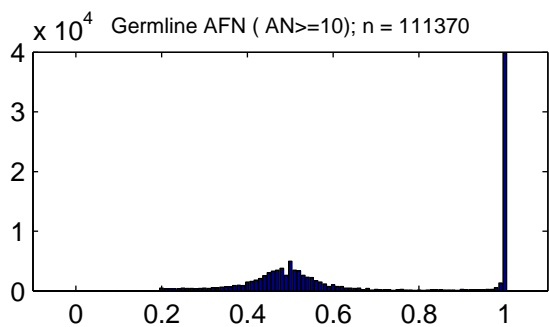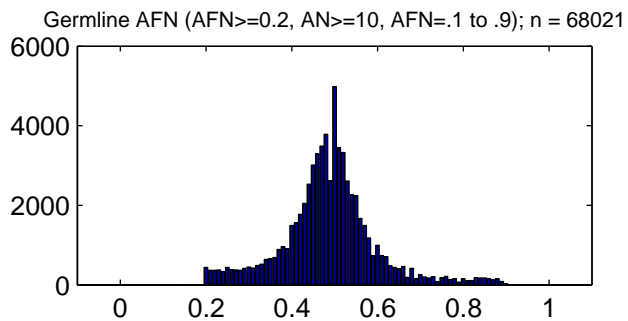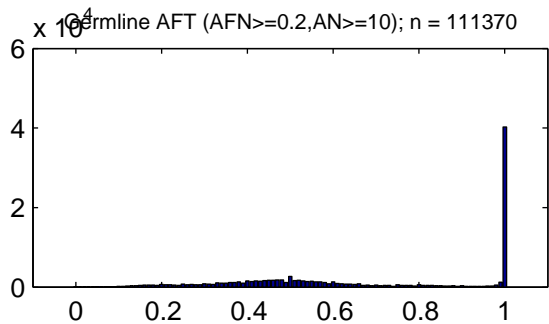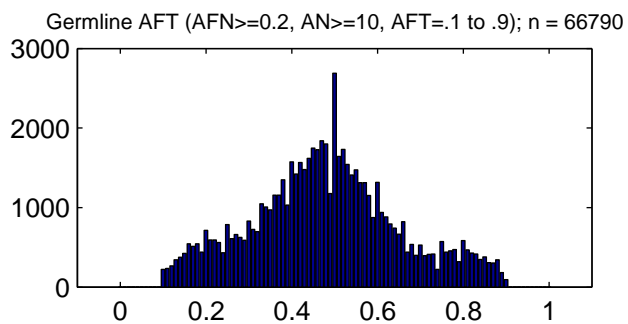

196\_ucsc.edu\_BRCA.IlluminaGA\_DNASeq.Level\_2.4.0.0 -- TCGA-A8-A086\_W

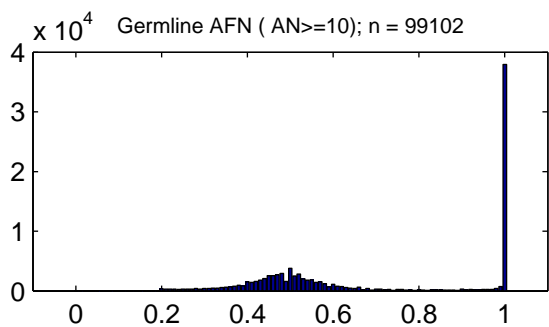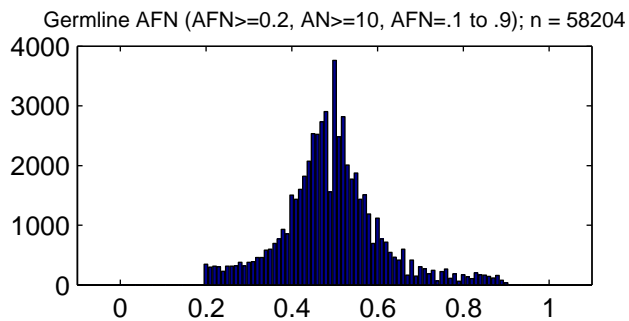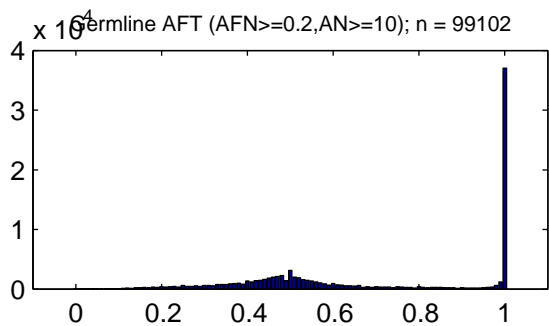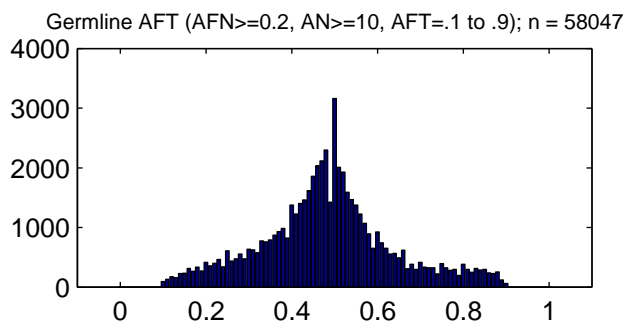

197\_ucsc.edu\_BRCA.IlluminaGA\_DNASeq.Level\_2.11.0.0 -- TCGA-C8-A12Z\_D

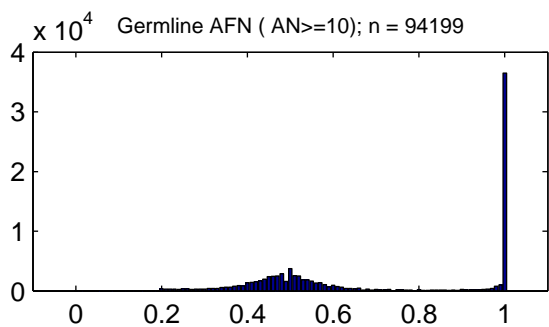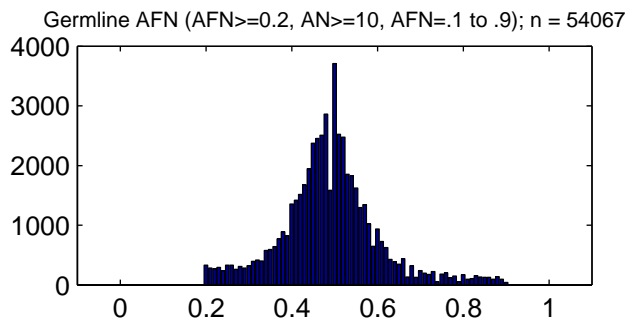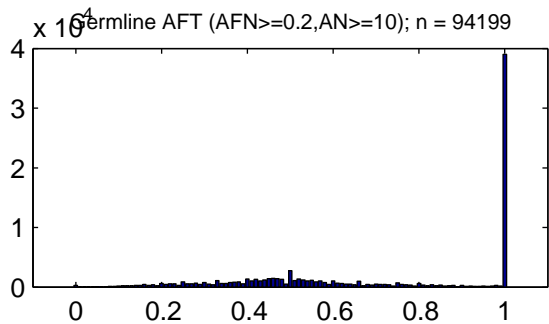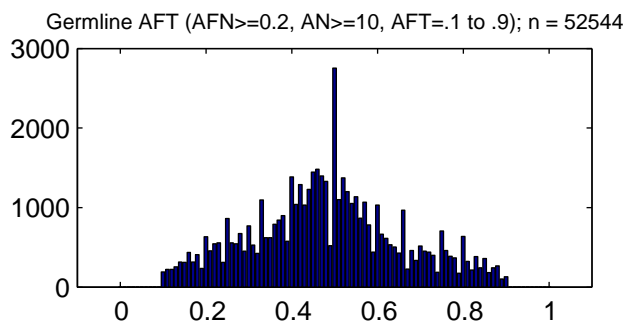

198\_ucsc.edu\_BRCA.IlluminaGA\_DNASeq.Level\_2.2.0.0 -- TCGA-A2-A0CX\_W

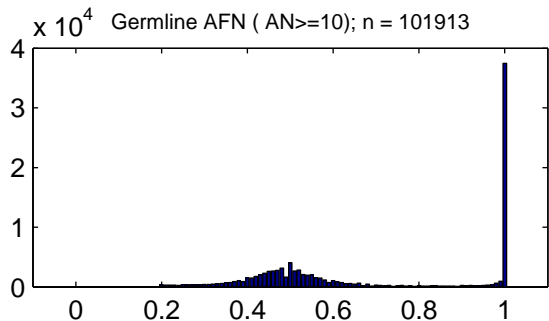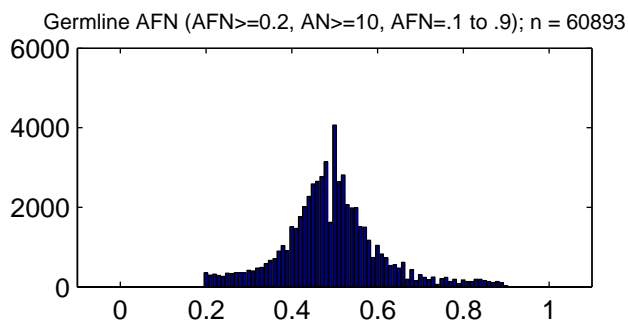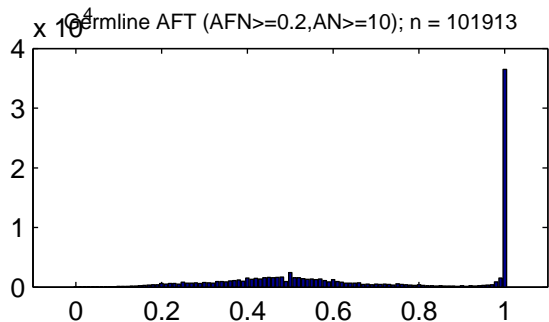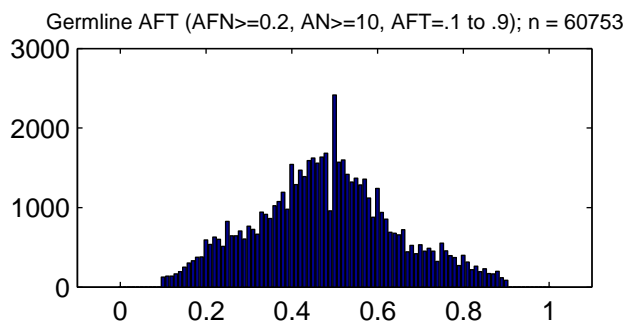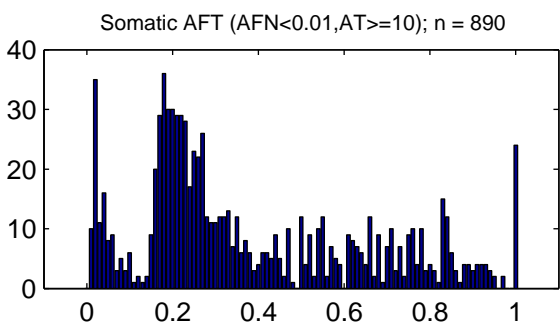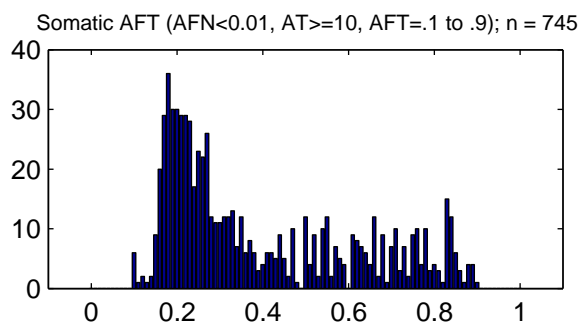

199\_ucsc.edu\_BRCA.IlluminaGA\_DNASeq.Level\_2.5.0.0 -- TCGA-AN-A049\_W

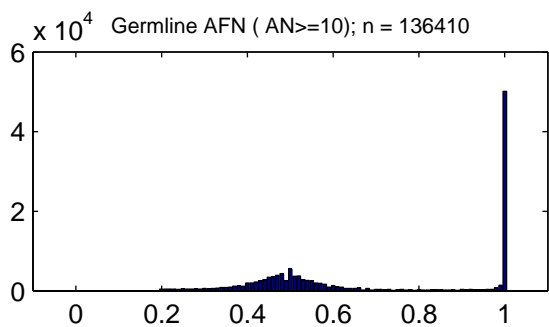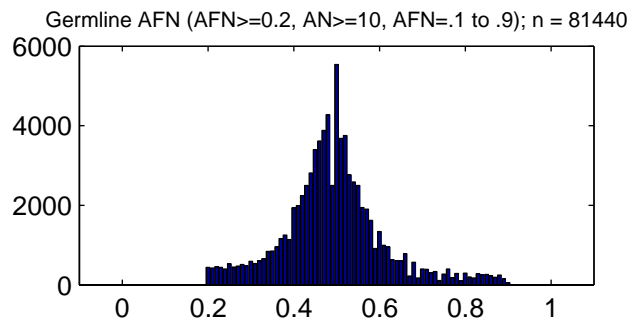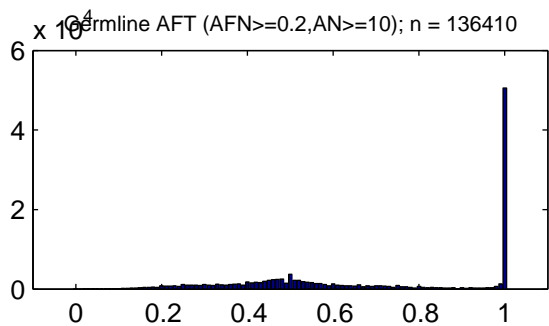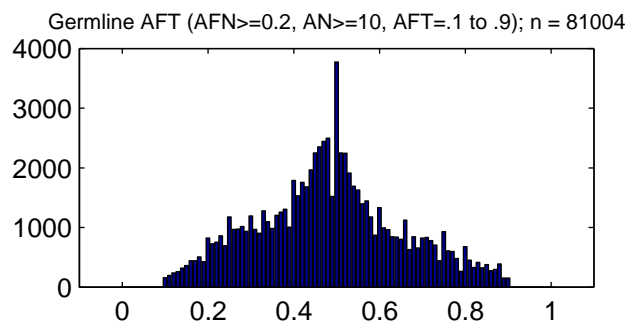



200\_ucsc.edu\_BRCA.IlluminaGA\_DNASeq.Level\_2.6.0.0 -- TCGA-AO-A0J9\_W

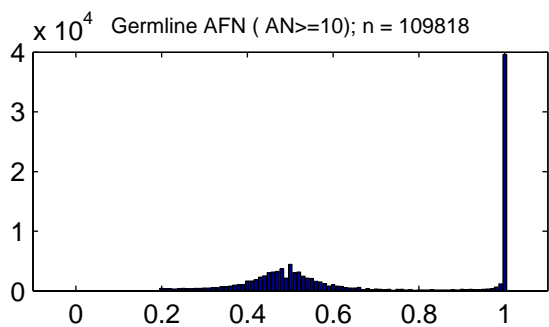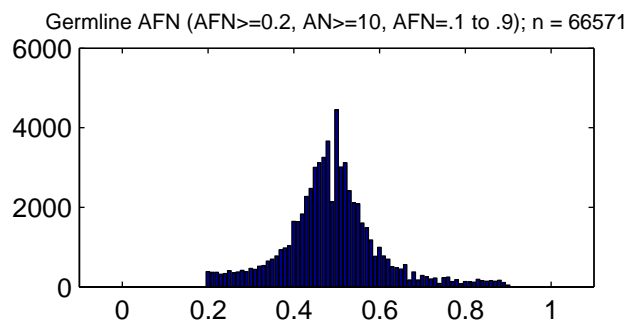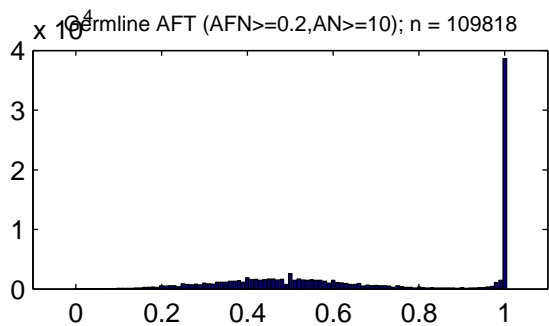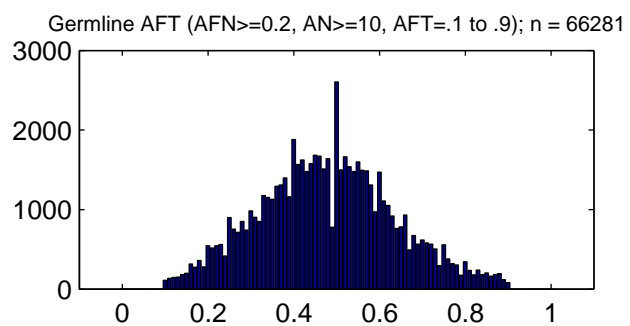

201\_ucsc.edu\_BRCA.IlluminaGA\_DNASeq.Level\_2.13.0.0 -- TCGA-E2-A1BD\_C

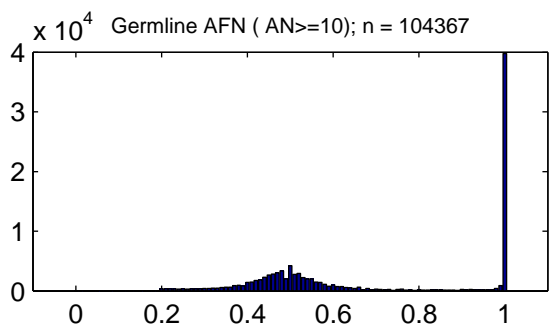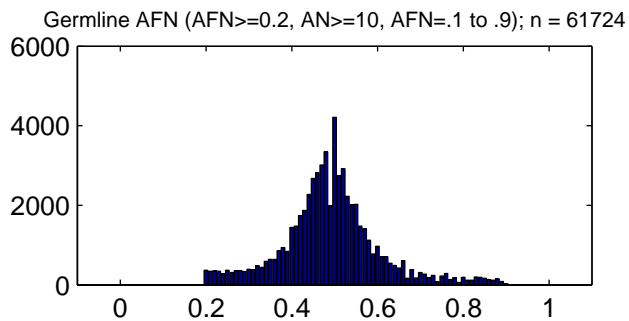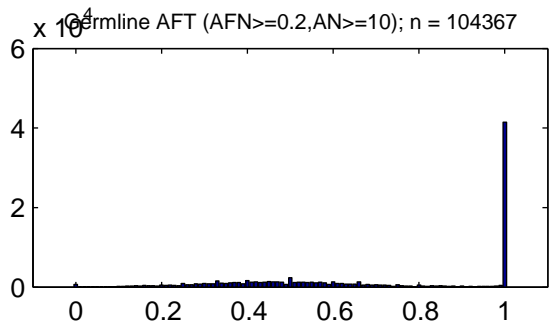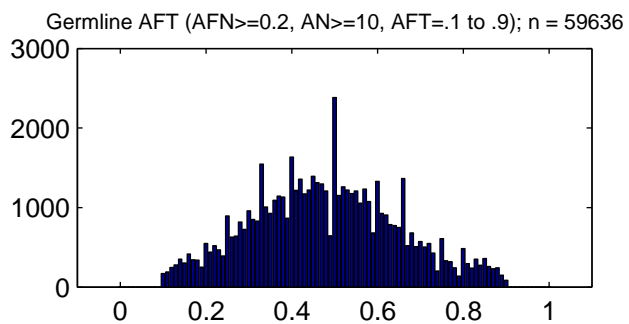

202\_ucsc.edu\_BRCA.IlluminaGA\_DNASeq.Level\_2.4.0.0 -- TCGA-A8-A08O\_W

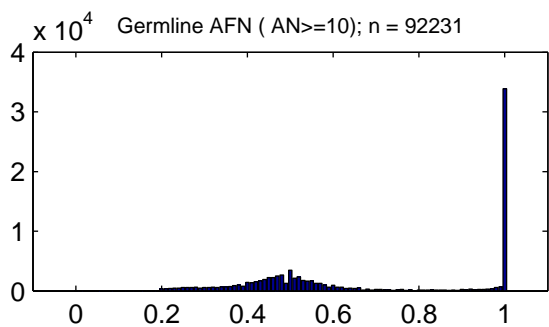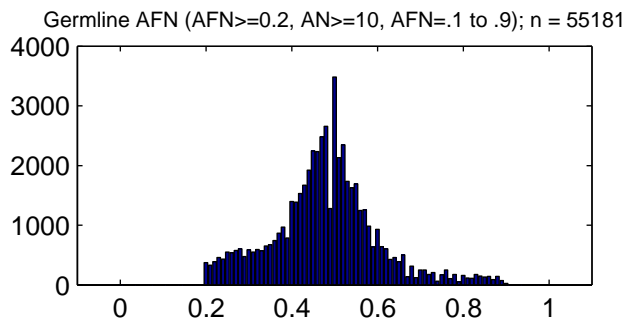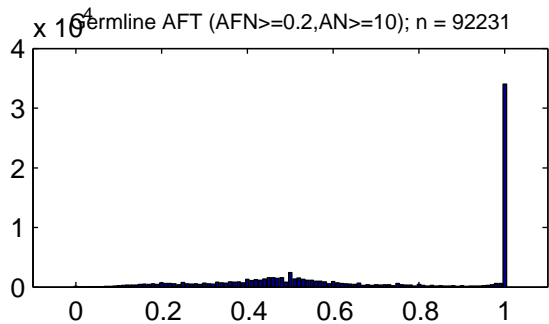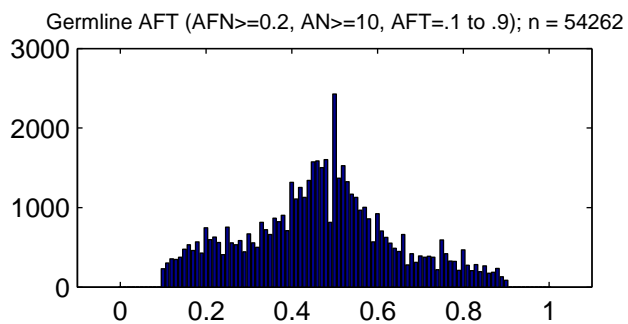

203\_ucsc.edu\_BRCA.IlluminaGA\_DNASeq.Level\_2.13.0.0 -- TCGA-E2-A14Z\_D

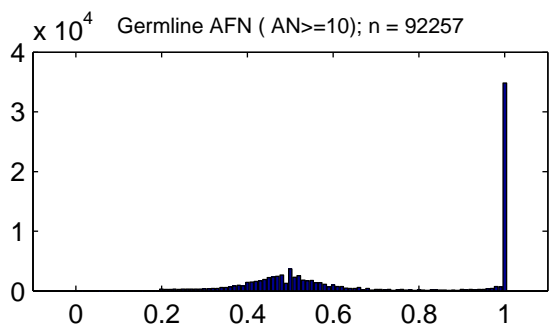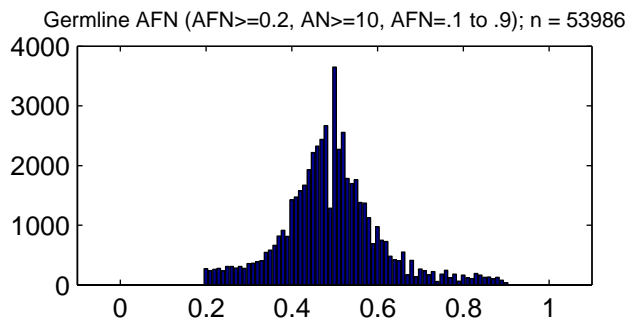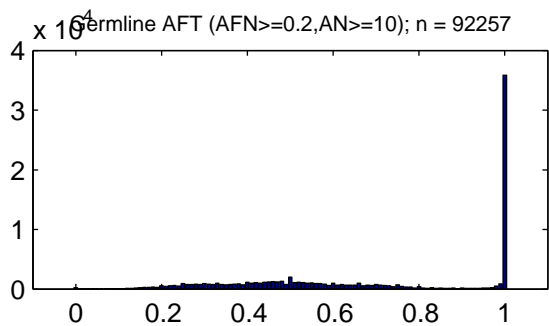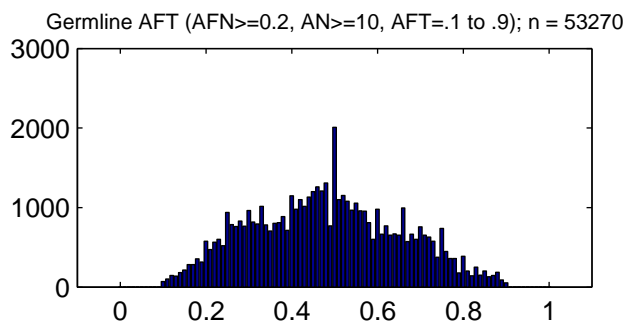

204\_ucsc.edu\_BRCA.IlluminaGA\_DNASeq.Level\_2.10.0.0 -- TCGA-BH-A0AY\_V

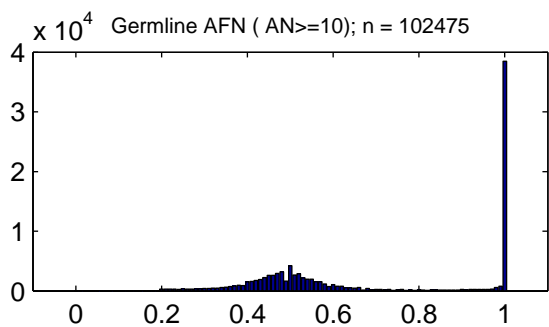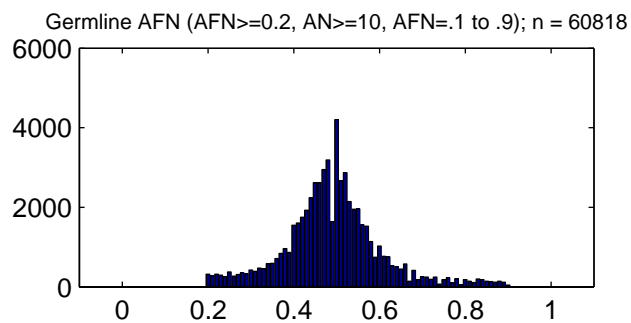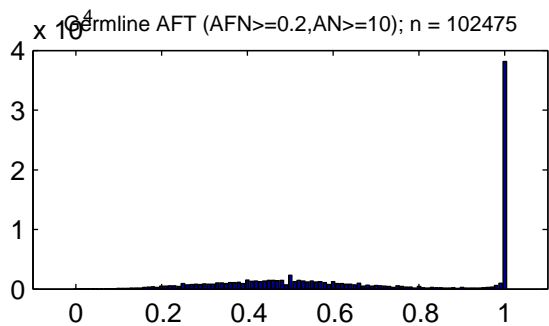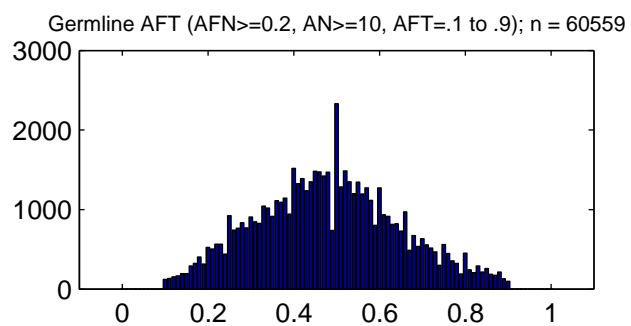

205\_ucsc.edu\_BRCA.IlluminaGA\_DNASeq.Level\_2.3.0.0 -- TCGA-A7-A13F\_D

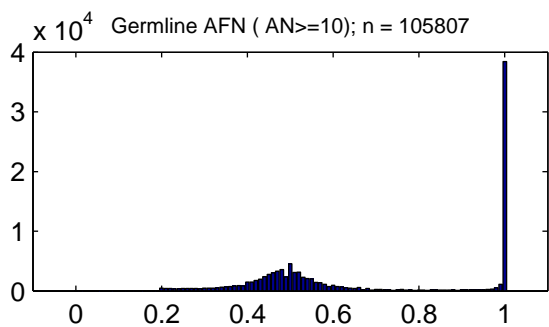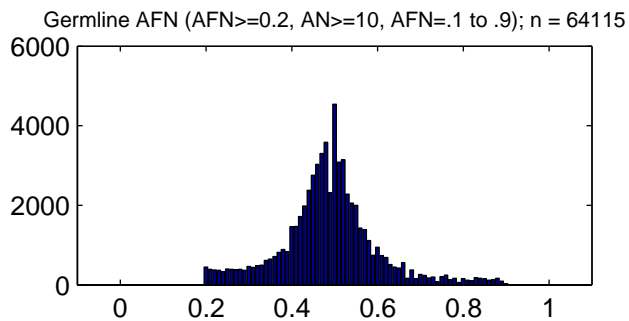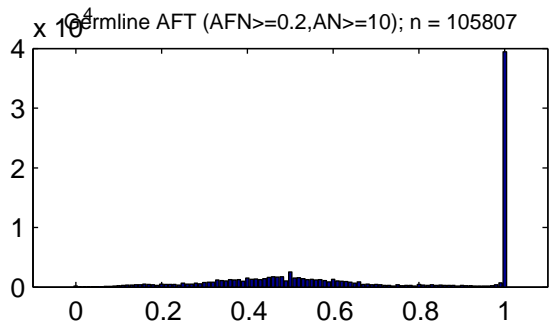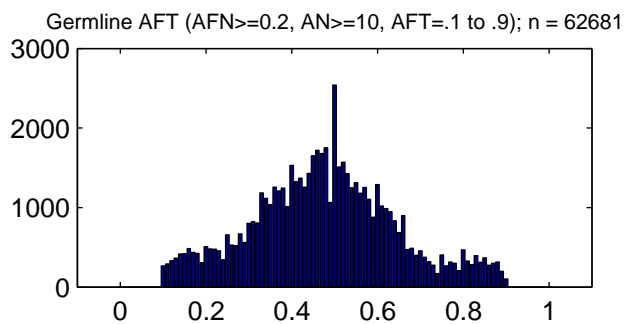

206\_ucsc.edu\_BRCA.IlluminaGA\_DNASeq.Level\_2.11.0.0 -- TCGA-C8-A1HF\_C

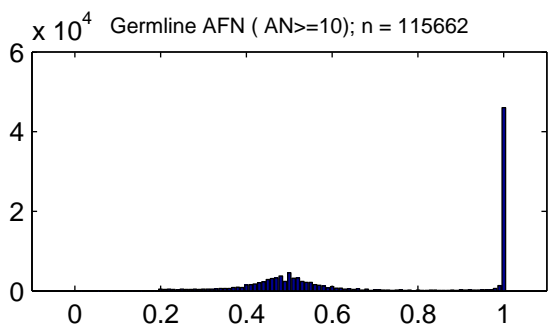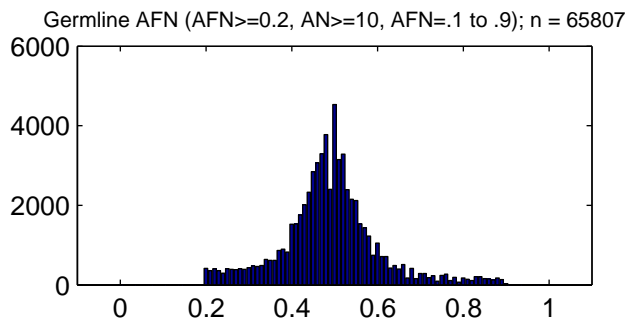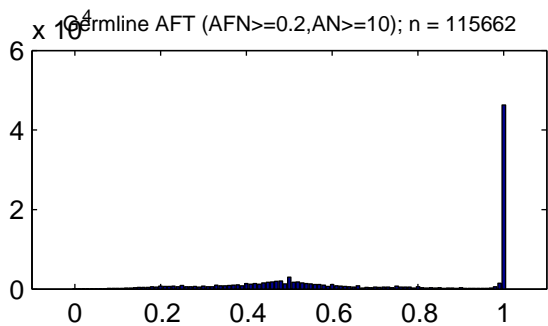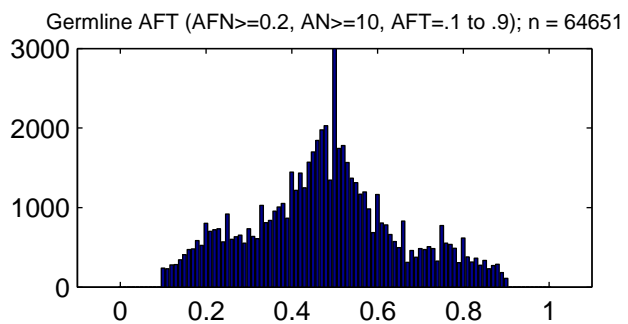

207\_ucsc.edu\_BRCA.IlluminaGA\_DNASeq.Level\_2.1.0.0 -- TCGA-A1-A0SJ\_D

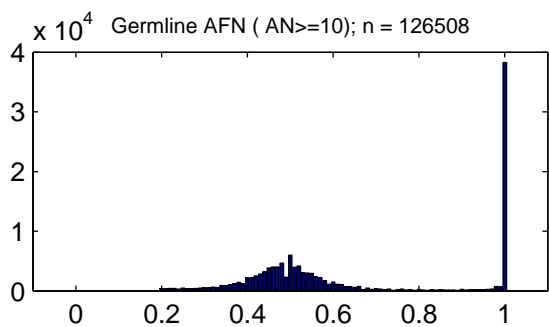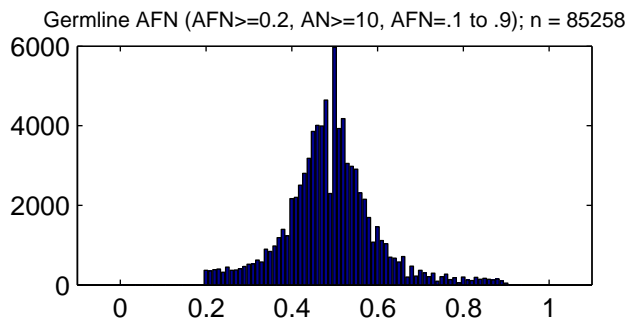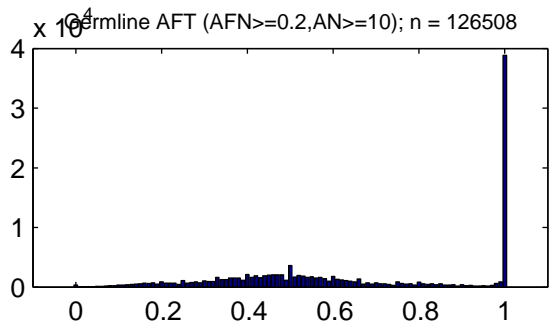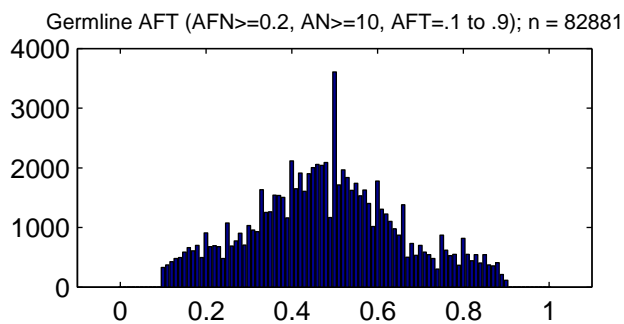



208\_ucsc.edu\_BRCA.IlluminaGA\_DNASeq.Level\_2.4.0.0 -- TCGA-A8-A084\_W

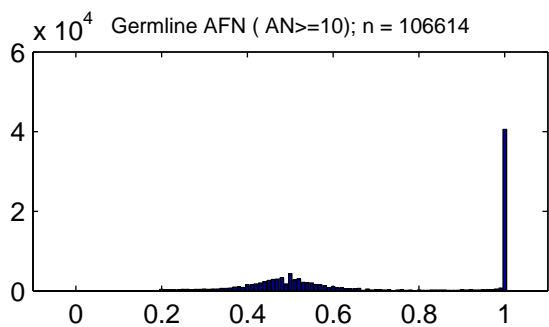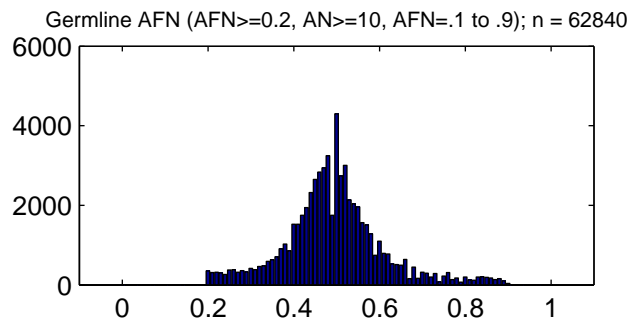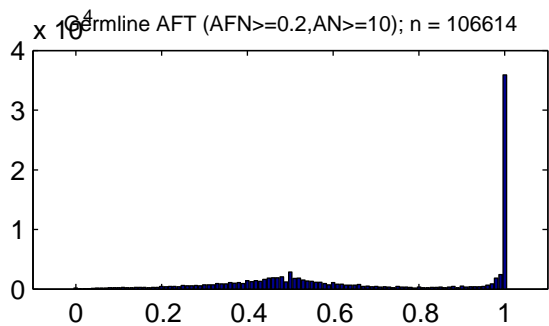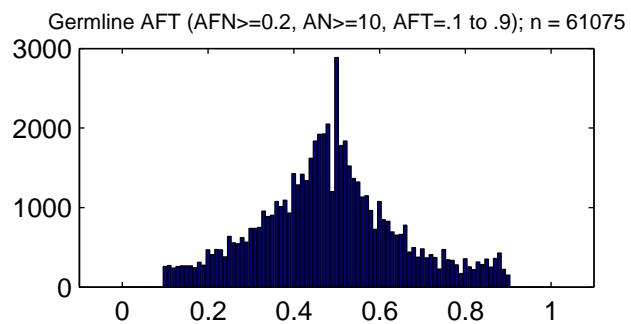

209\_ucsc.edu\_BRCA.IlluminaGA\_DNASeq.Level\_2.4.0.0 -- TCGA-A8-A09M\_W

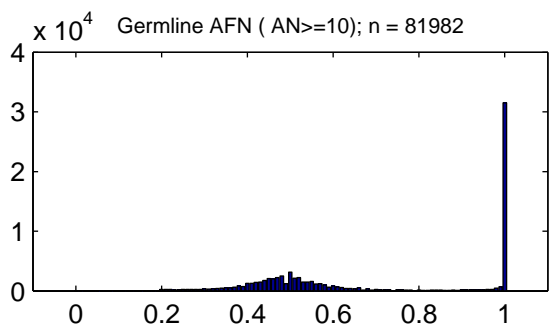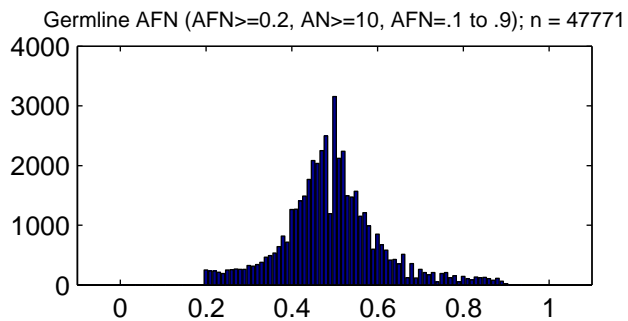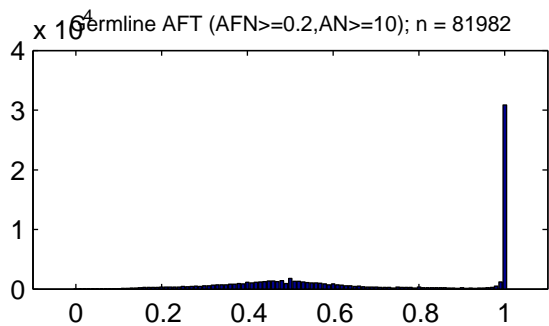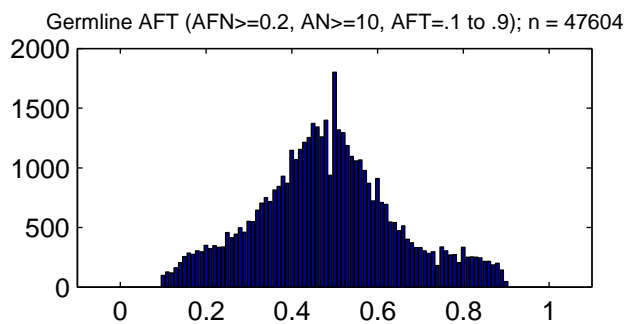

210\_ucsc.edu\_BRCA.IlluminaGA\_DNASeq.Level\_2.5.0.0 -- TCGA-AN-A04D\_W

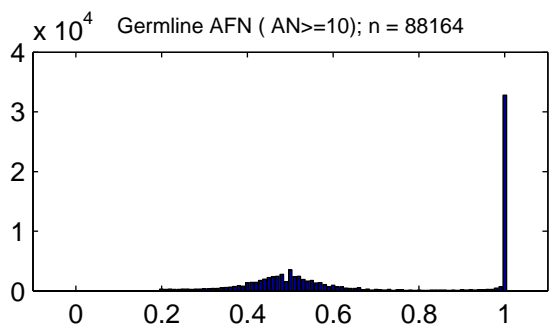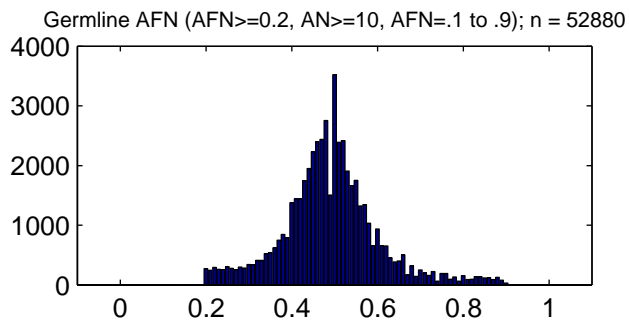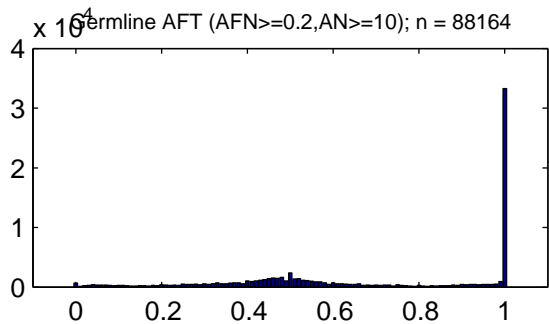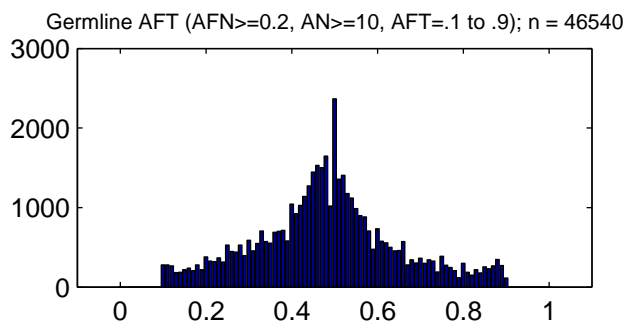

211\_ucsc.edu\_BRCA.IlluminaGA\_DNASeq.Level\_2.4.0.0 -- TCGA-A8-A085\_W

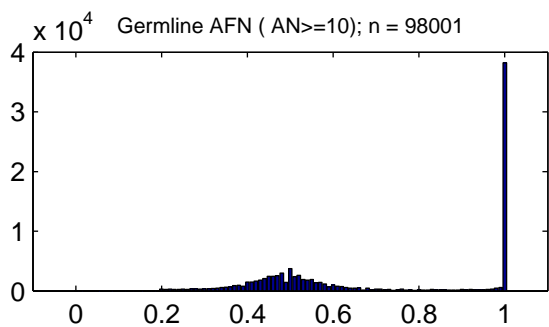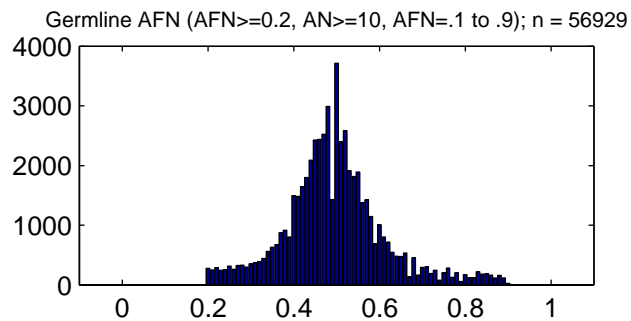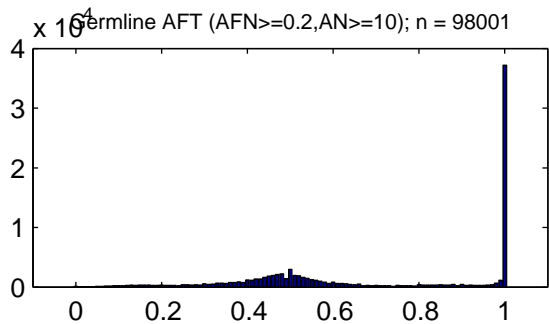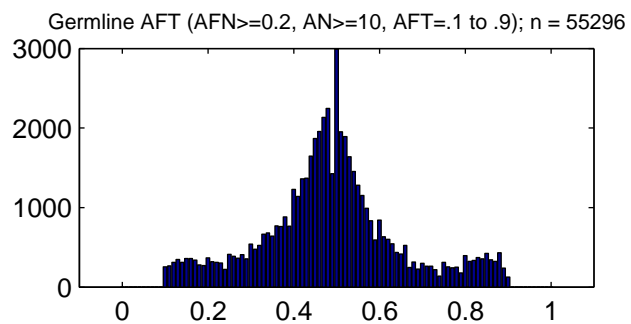

212\_ucsc.edu\_BRCA.IlluminaGA\_DNASeq.Level\_2.13.0.0 -- TCGA-E2-A10C\_C

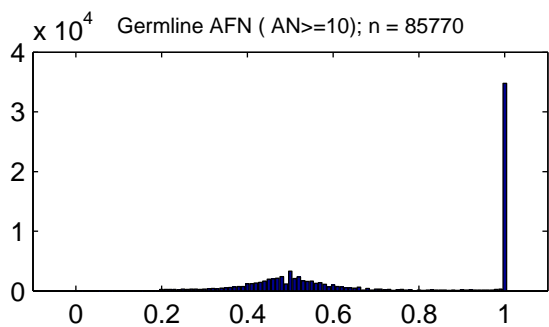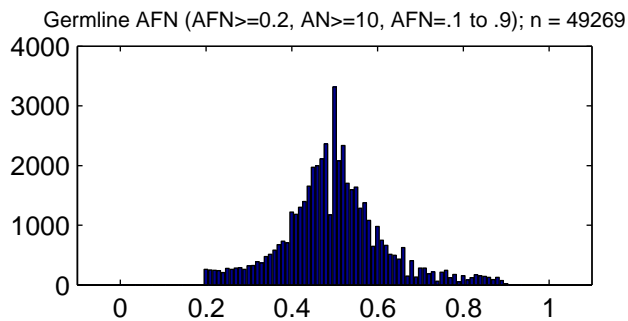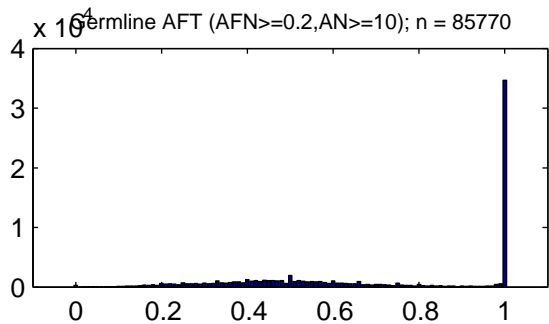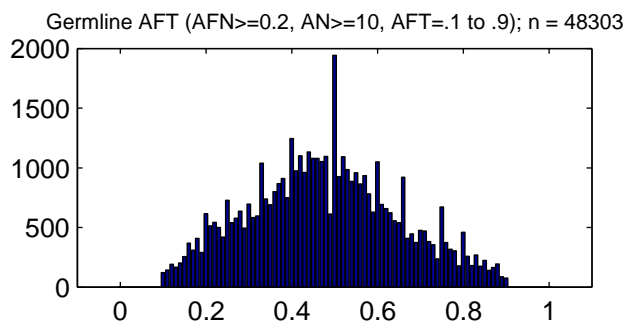

213\_ucsc.edu\_BRCA.IlluminaGA\_DNASeq.Level\_2.4.0.0 -- TCGA-A8-A091\_W

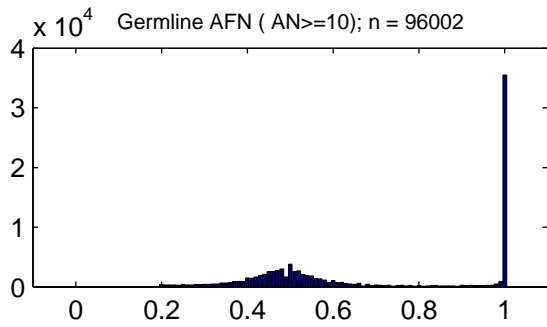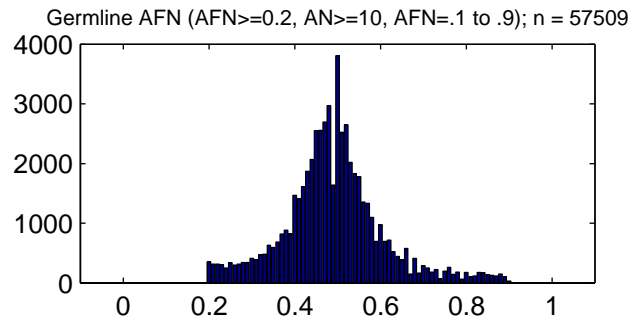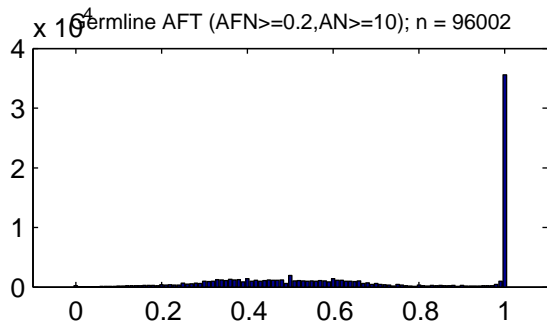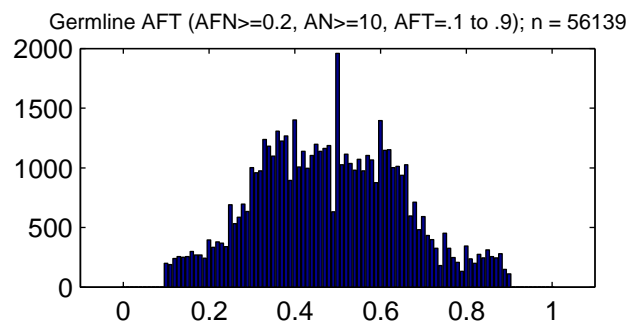

214\_ucsc.edu\_BRCA.IlluminaGA\_DNASeq.Level\_2.8.0.0 -- TCGA-AR-A0TW\_D

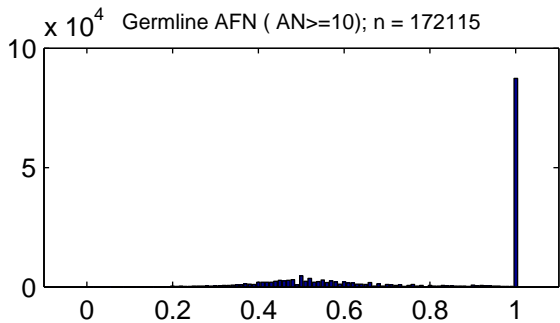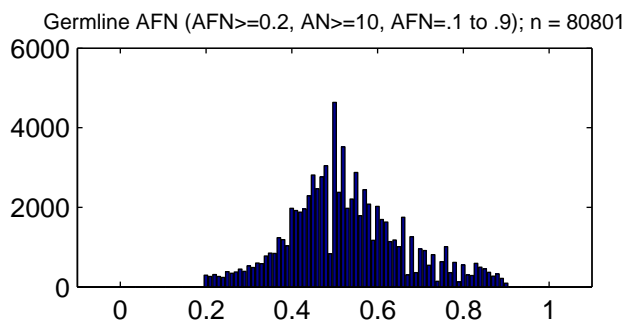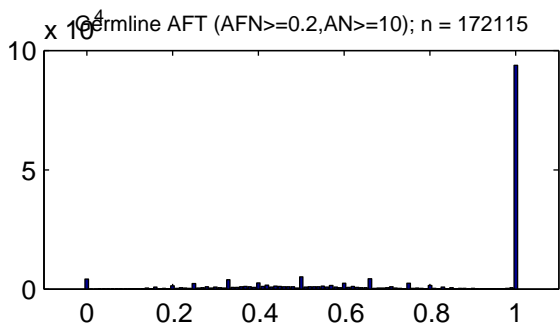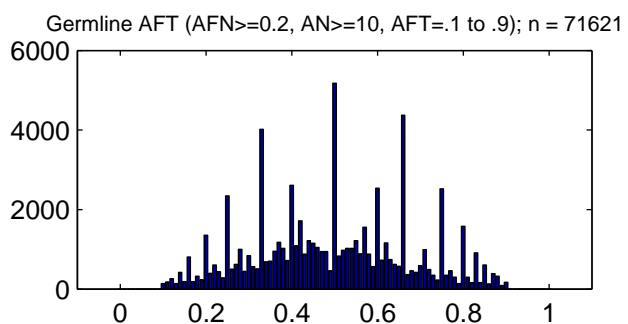

215\_ucsc.edu\_BRCA.IlluminaGA\_DNASeq.Level\_2.4.0.0 -- TCGA-A8-A090\_W

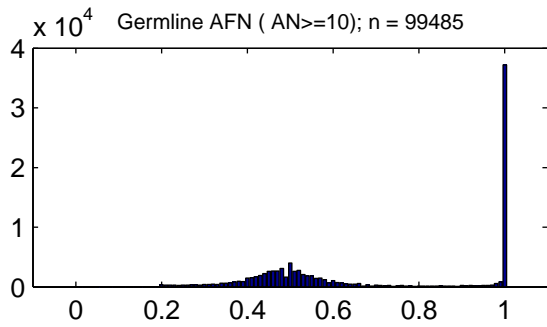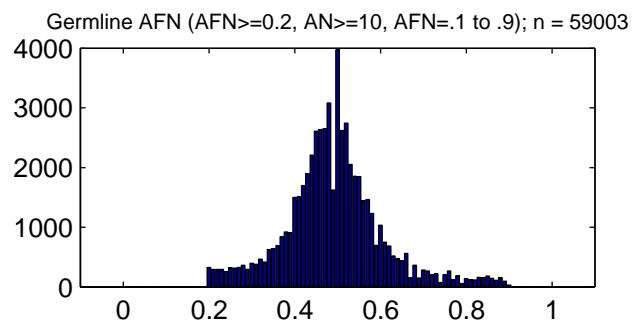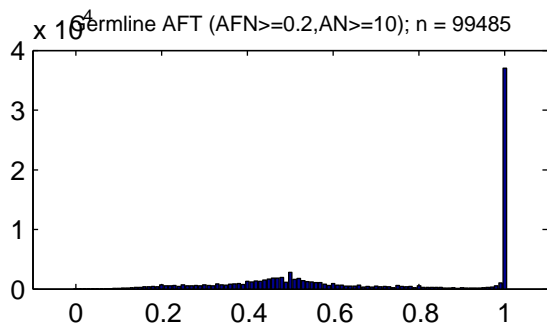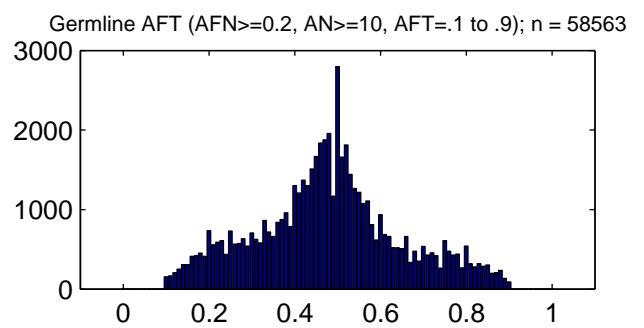



216\_ucsc.edu\_BRCA.IlluminaGA\_DNASeq.Level\_2.4.0.0 -- TCGA-A8-A094\_W

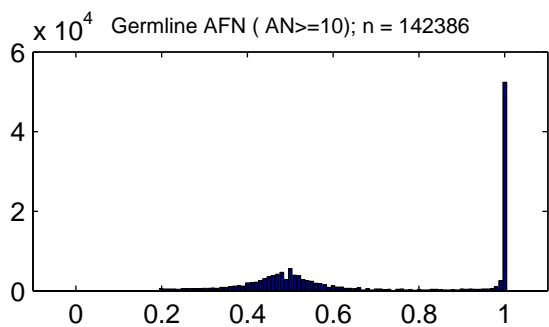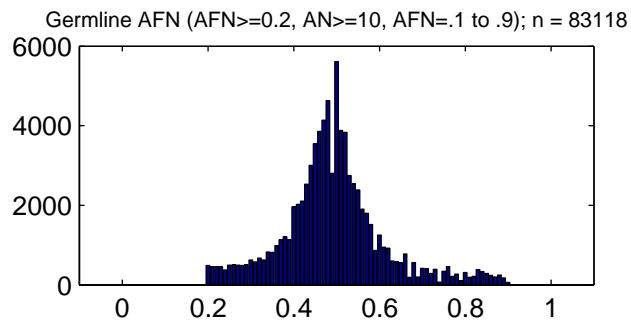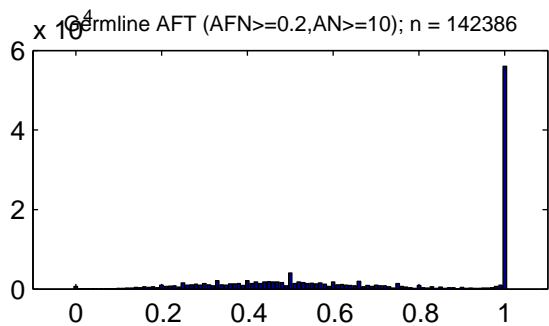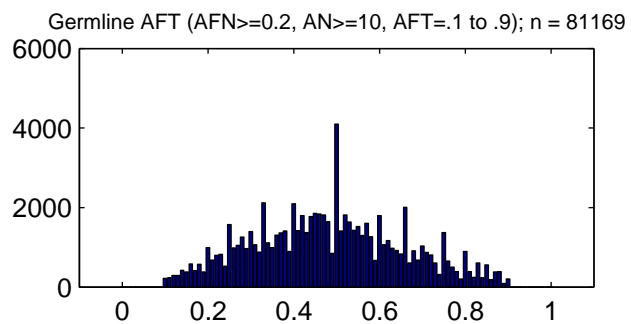

217\_ucsc.edu\_BRCA.IlluminaGA\_DNASeq.Level\_2.10.0.0 -- TCGA-BH-A0BZ\_C

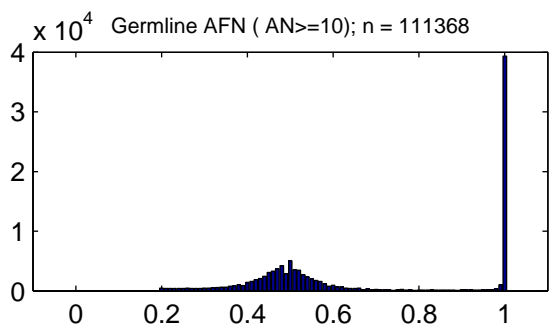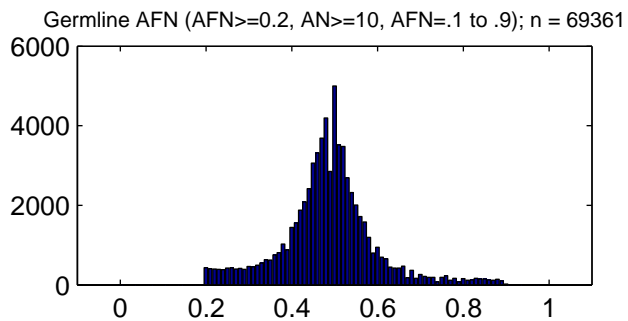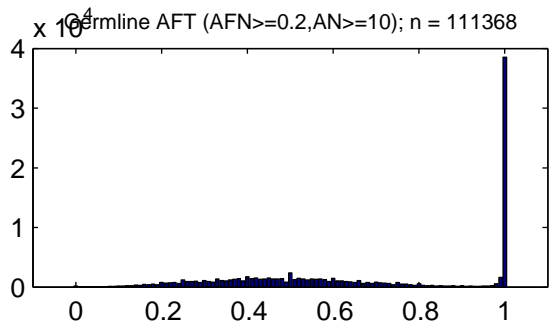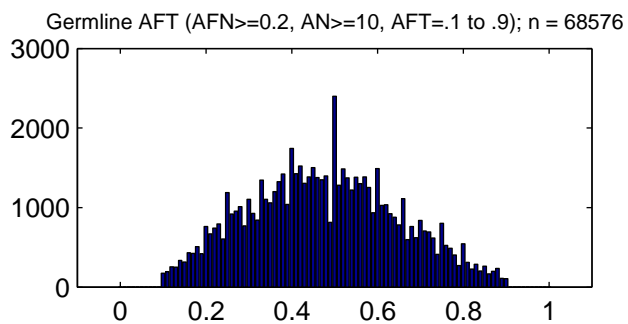

218\_ucsc.edu\_BRCA.IlluminaGA\_DNASeq.Level\_2.2.0.0 -- TCGA-A2-A0EU\_W

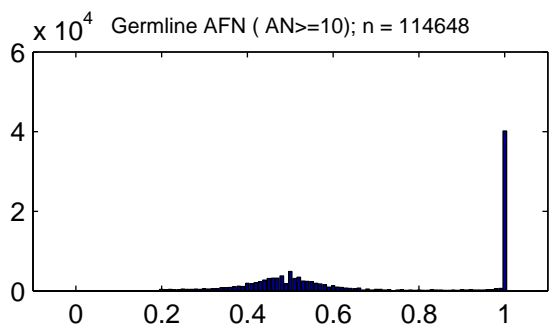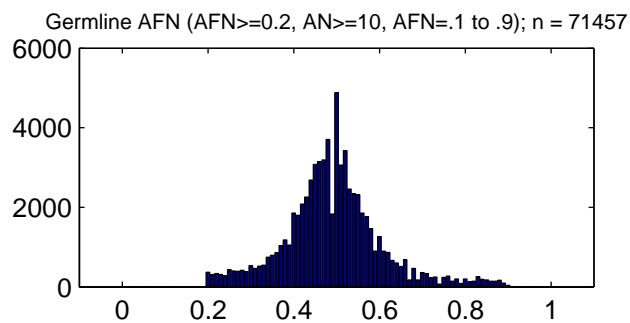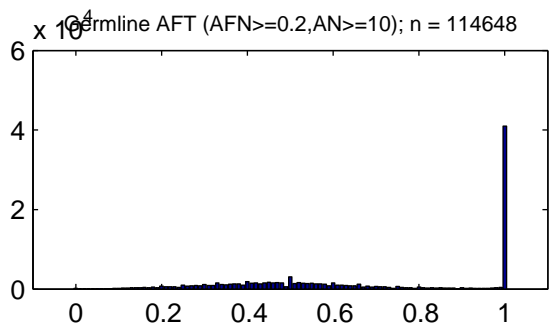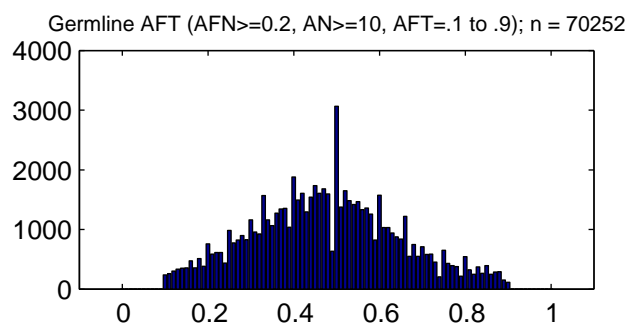

219\_ucsc.edu\_BRCA.IlluminaGA\_DNASeq.Level\_2.10.0.0 -- TCGA-BH-A0E6\_V

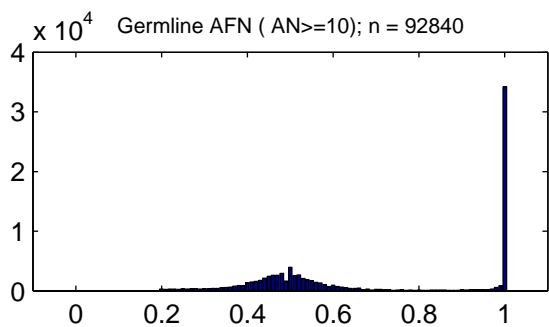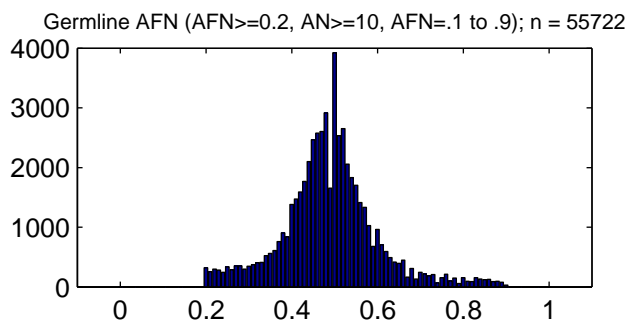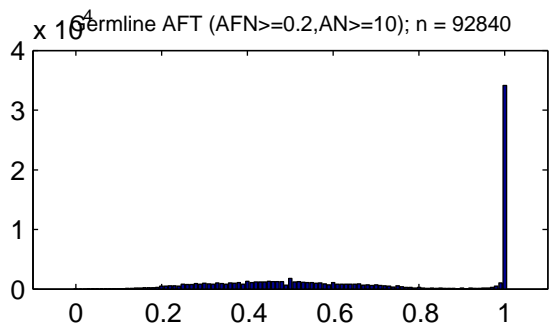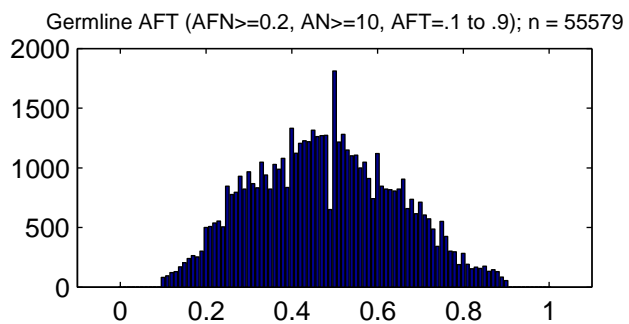

220\_ucsc.edu\_BRCA.IlluminaGA\_DNASeq.Level\_2.4.0.0 -- TCGA-A8-A0AB\_W

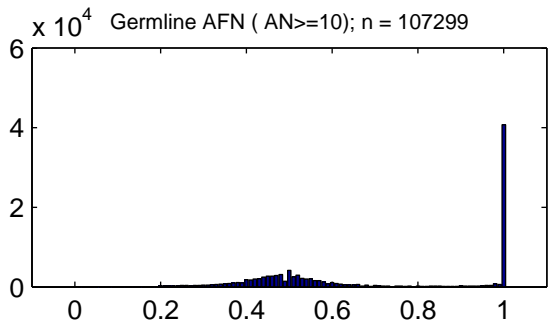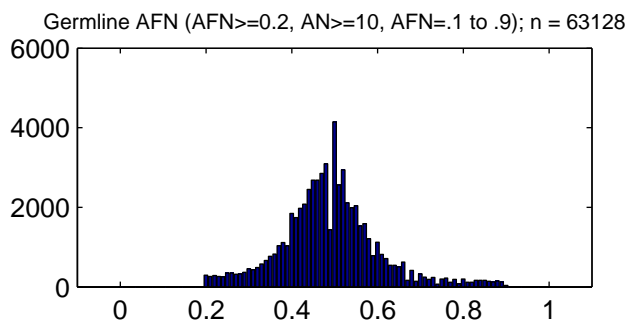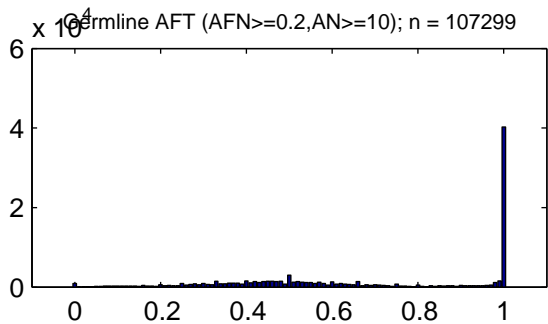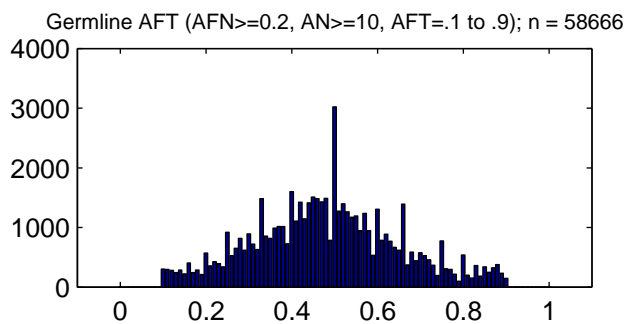

221\_ucsc.edu\_BRCA.IlluminaGA\_DNASeq.Level\_2.11.0.0 -- TCGA-C8-A12P\_C

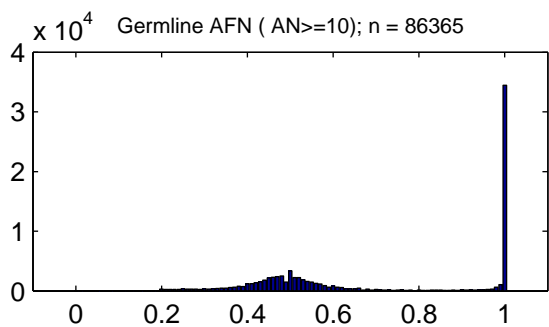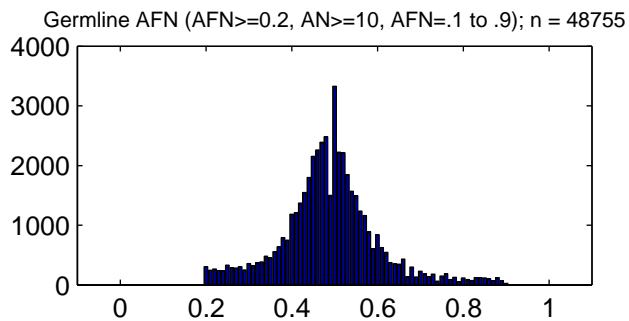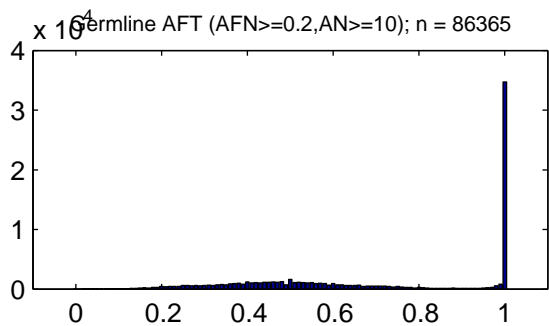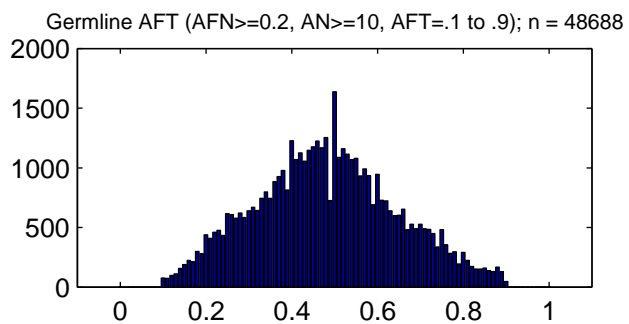

222\_ucsc.edu\_BRCA.IlluminaGA\_DNASeq.Level\_2.13.0.0 -- TCGA-E2-A14T\_D

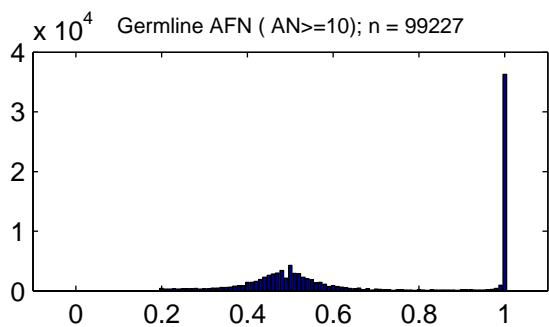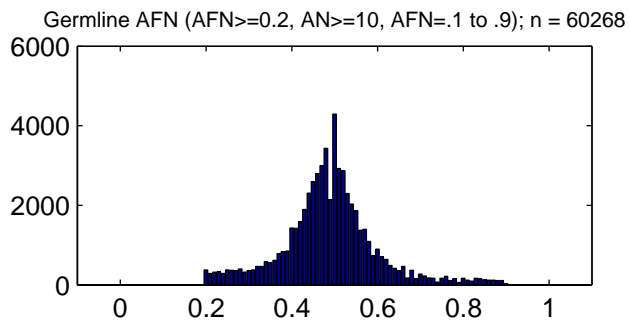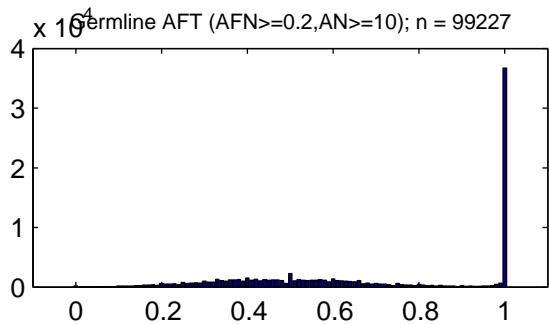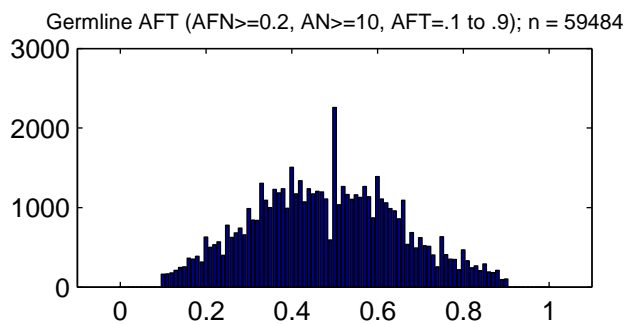

223\_ucsc.edu\_BRCA.IlluminaGA\_DNASeq.Level\_2.5.0.0 -- TCGA-AN-A0FD\_W

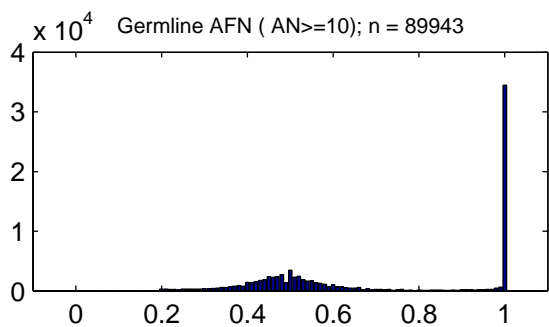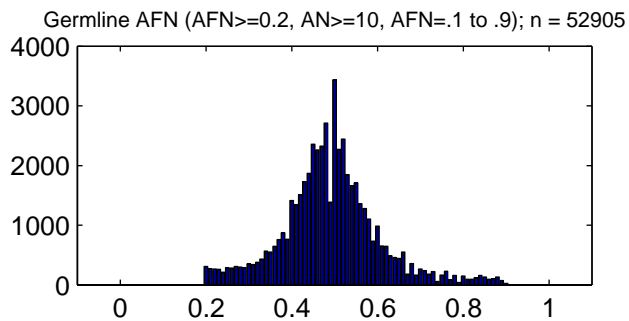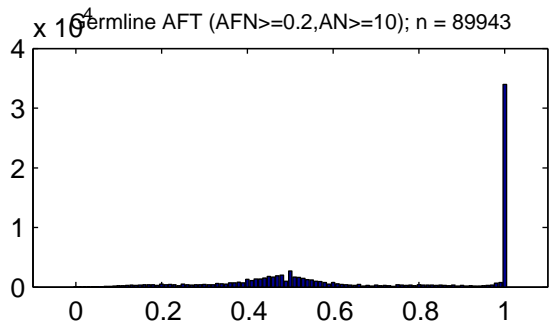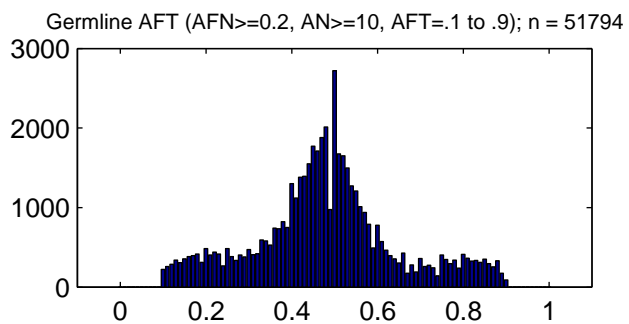



224\_ucsc.edu\_BRCA.IlluminaGA\_DNASeq.Level\_2.10.0.0 -- TCGA-BH-A18N\_C

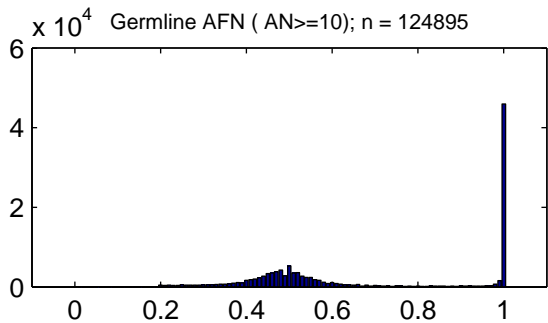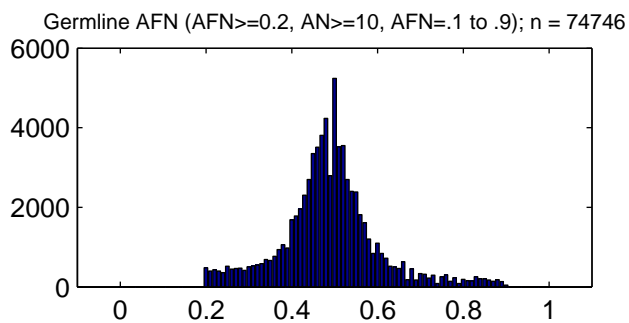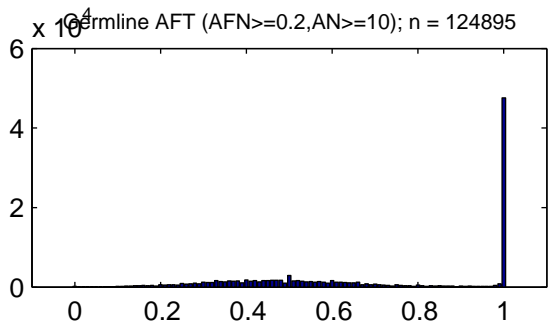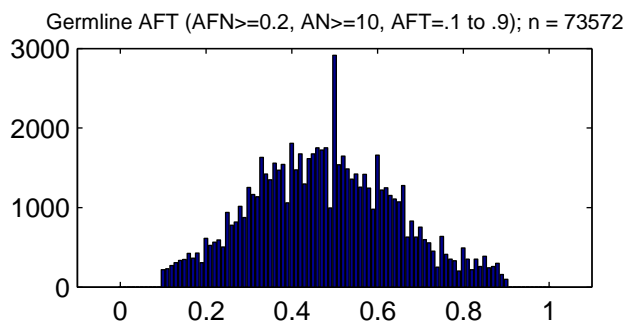

225\_ucsc.edu\_BRCA.IlluminaGA\_DNASeq.Level\_2.9.0.0 -- TCGA-B6-A0IK\_W

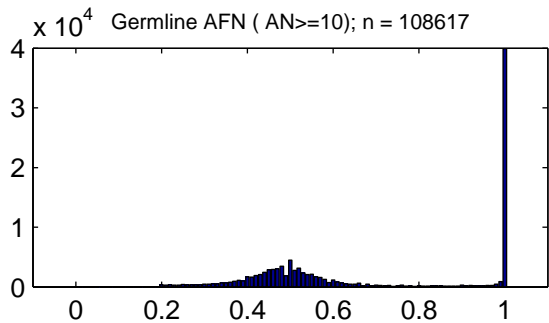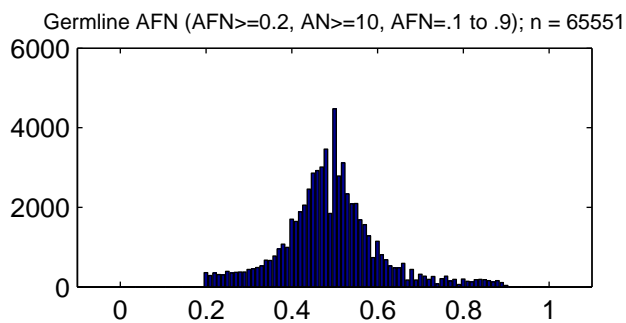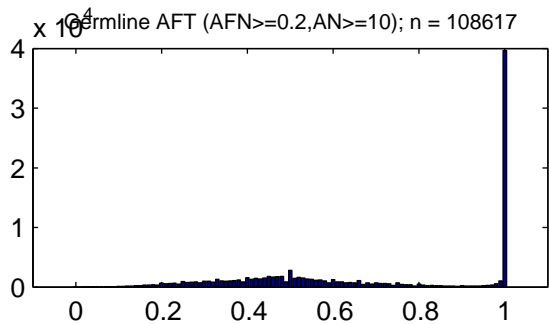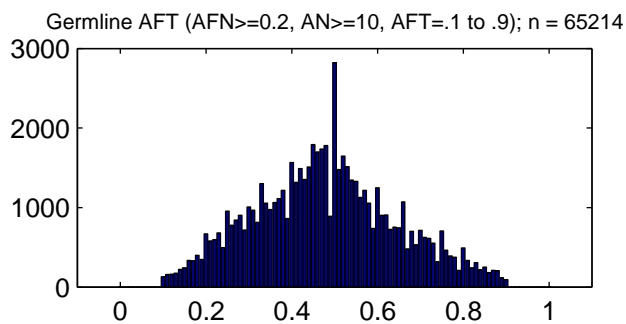

226\_ucsc.edu\_BRCA.IlluminaGA\_DNASeq.Level\_2.2.0.0 -- TCGA-A2-A0EV\_W

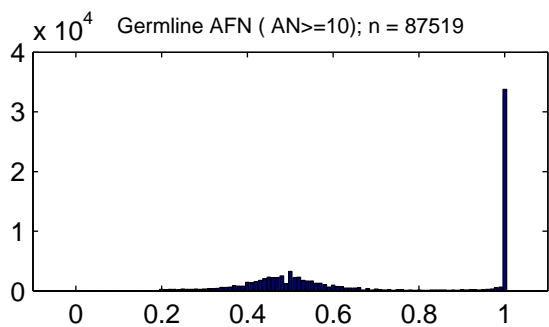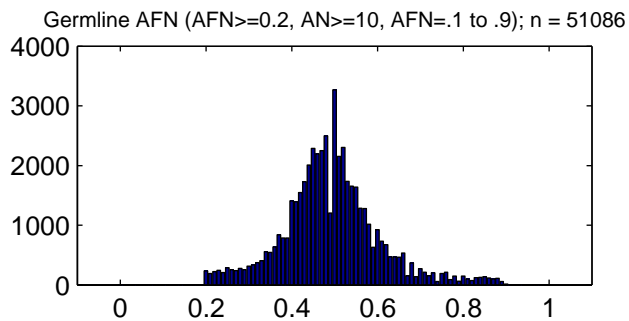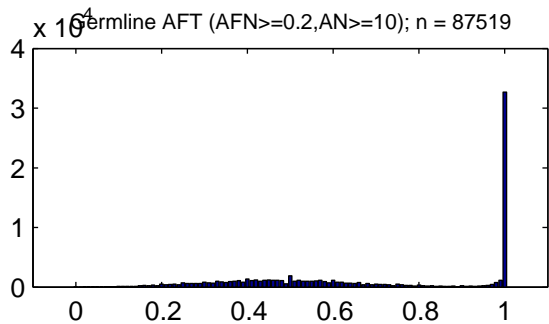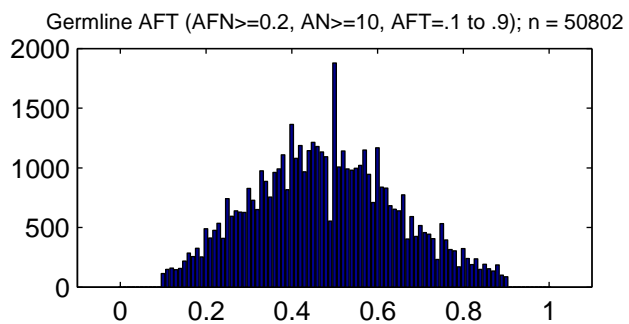

227\_ucsc.edu\_BRCA.IlluminaGA\_DNASeq.Level\_2.11.0.0 -- TCGA-C8-A137\_D

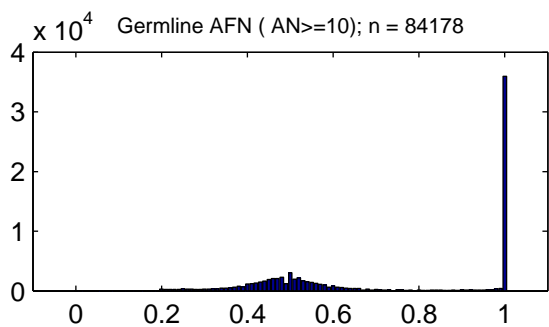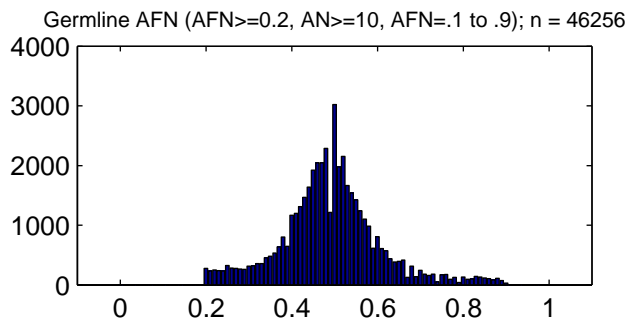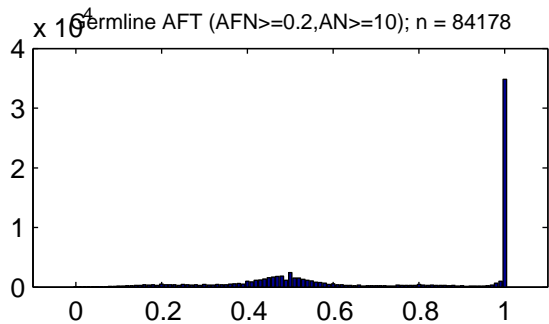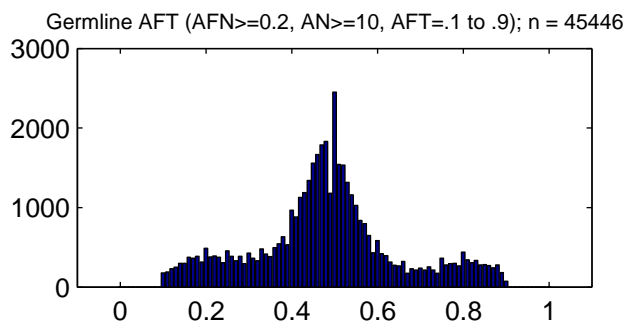

228\_ucsc.edu\_BRCA.IlluminaGA\_DNASeq.Level\_2.13.0.0 -- TCGA-E2-A15M\_C

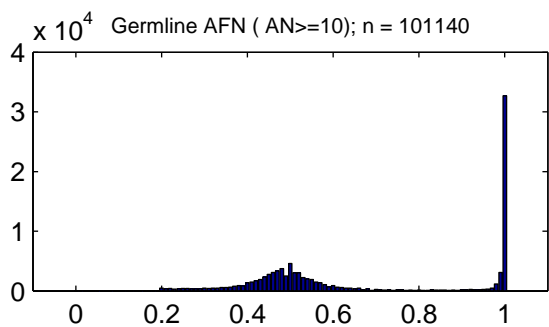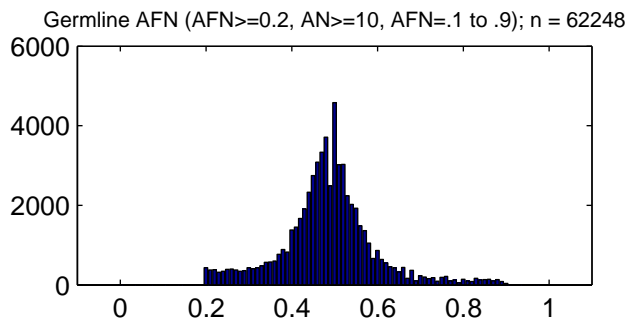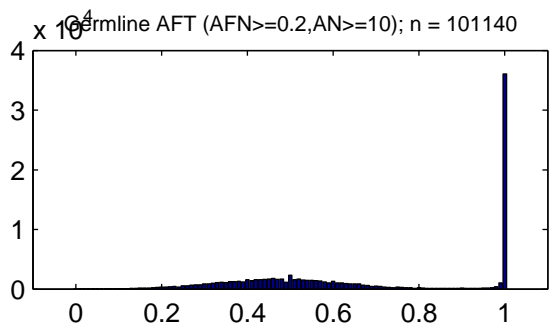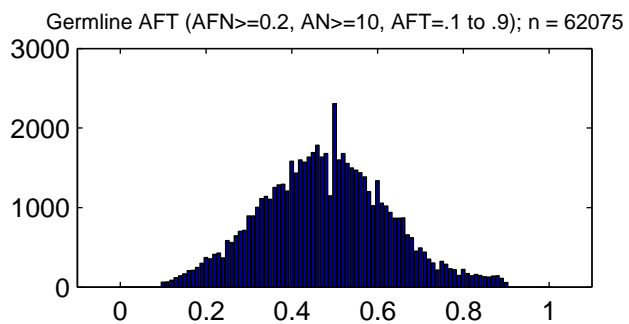

229\_ucsc.edu\_BRCA.IlluminaGA\_DNASeq.Level\_2.10.0.0 -- TCGA-BH-A0H0\_V

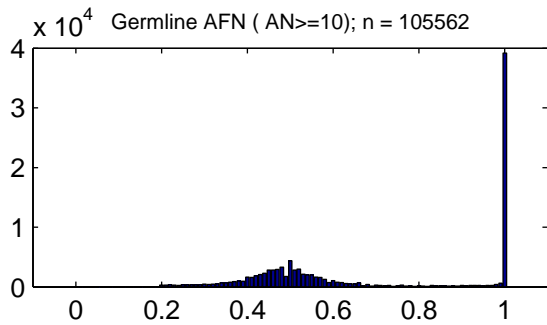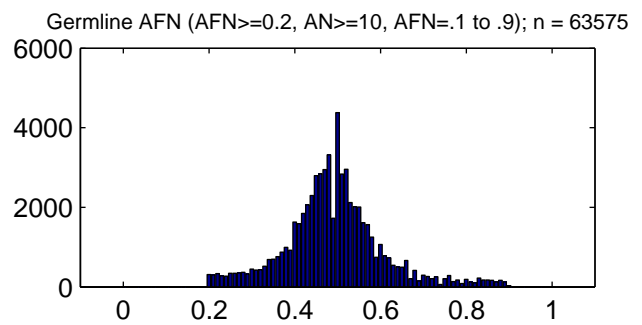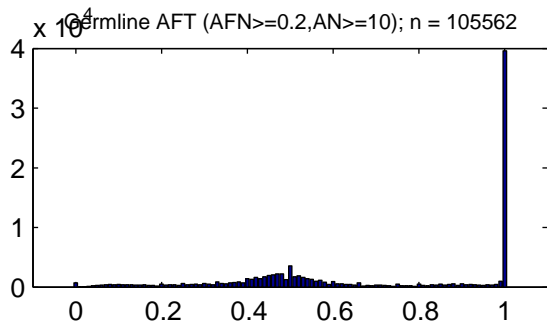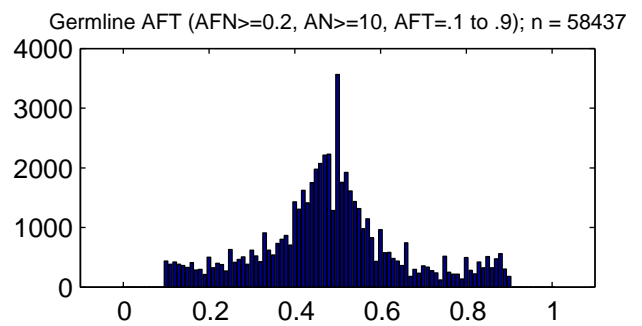

230\_ucsc.edu\_BRCA.IlluminaGA\_DNASeq.Level\_2.13.0.0 -- TCGA-E2-A14V\_C

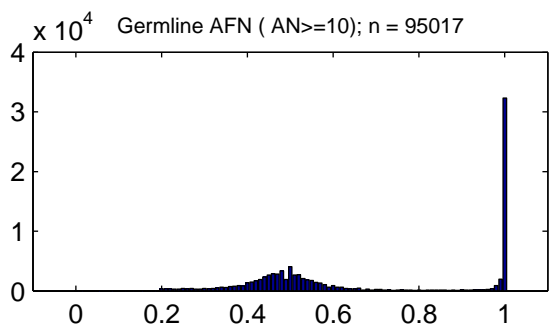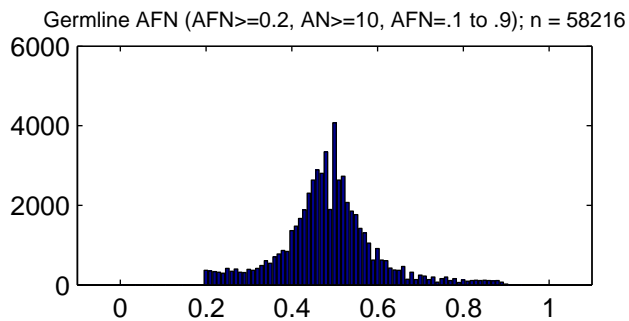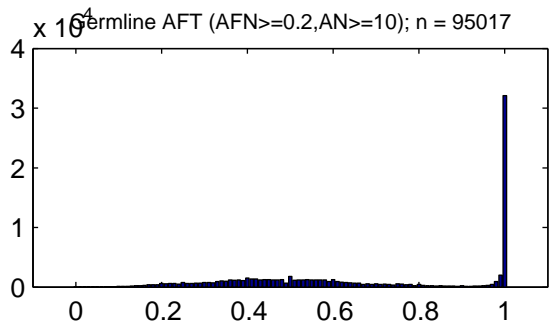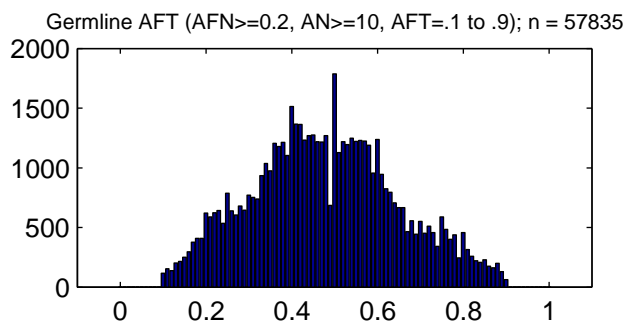

231\_ucsc.edu\_BRCA.IlluminaGA\_DNASeq.Level\_2.4.0.0 -- TCGA-A8-A07I\_W

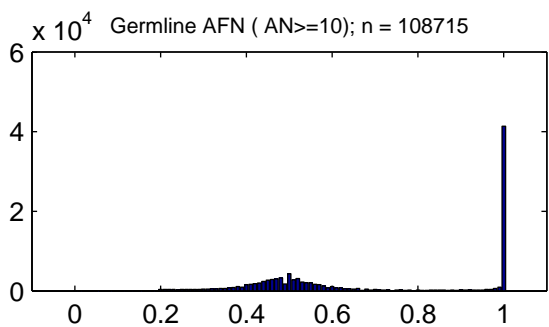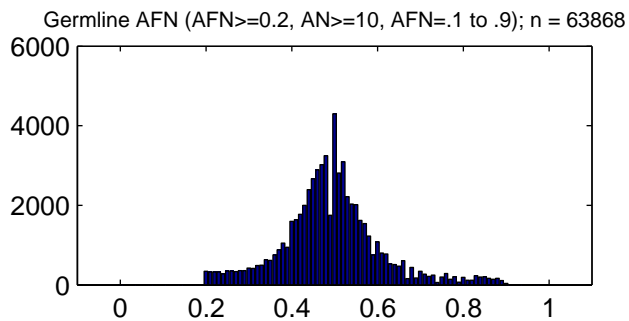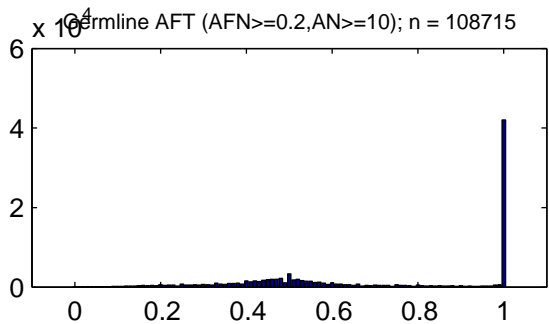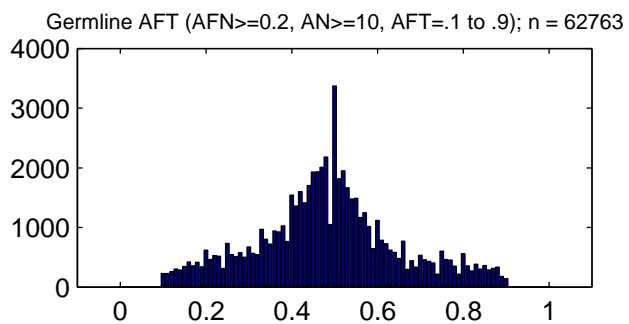



232\_ucsc.edu\_BRCA.IlluminaGA\_DNASeq.Level\_2.6.0.0 -- TCGA-AO-A03L\_W

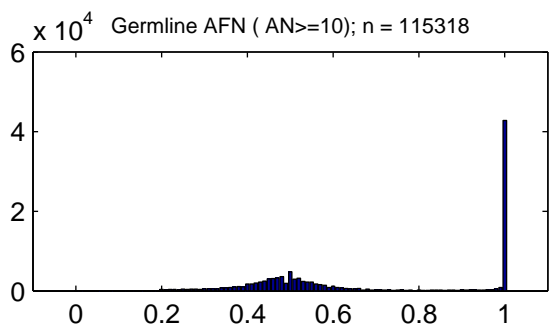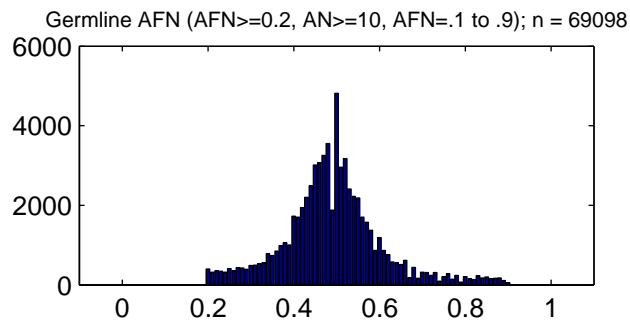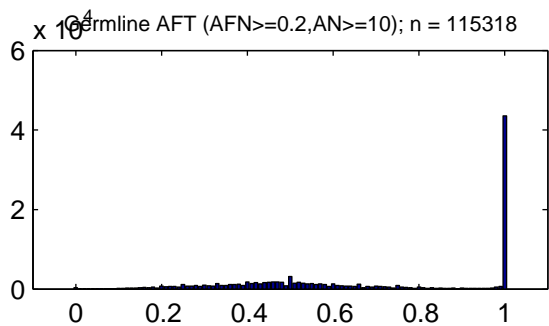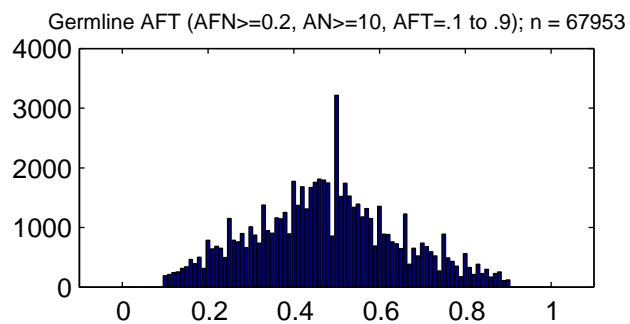

233\_ucsc.edu\_BRCA.IlluminaGA\_DNASeq.Level\_2.5.0.0 -- TCGA-AN-A041\_W

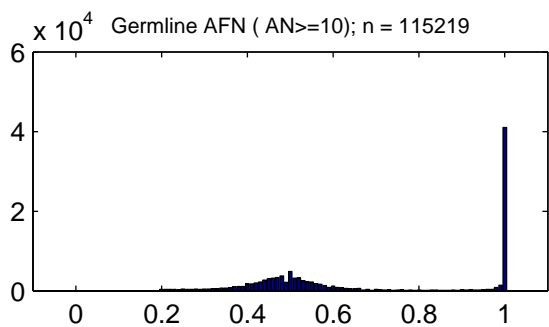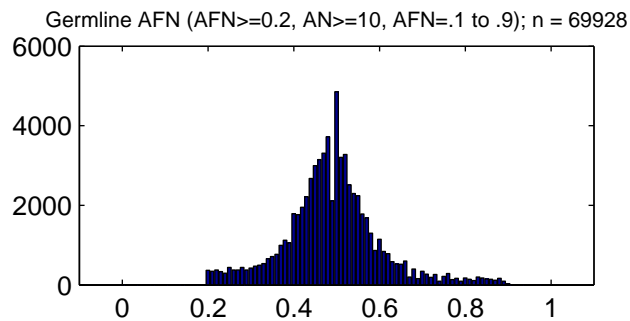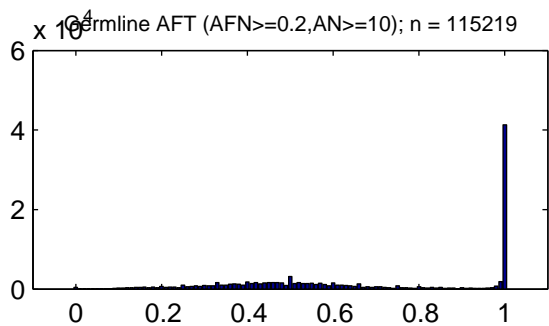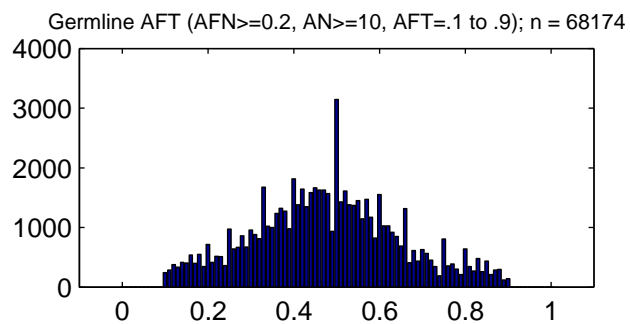

234\_ucsc.edu\_BRCA.IlluminaGA\_DNASeq.Level\_2.10.0.0 -- TCGA-BH-A0HL\_V

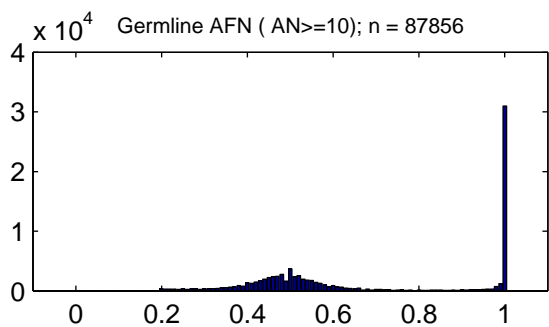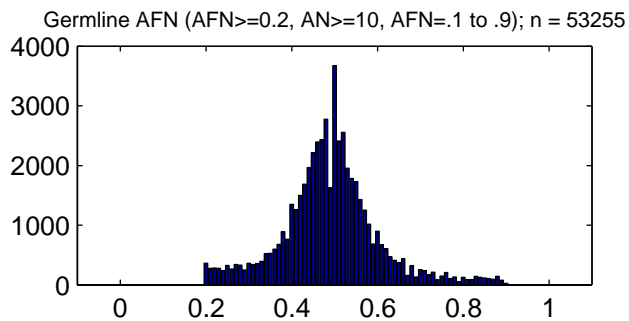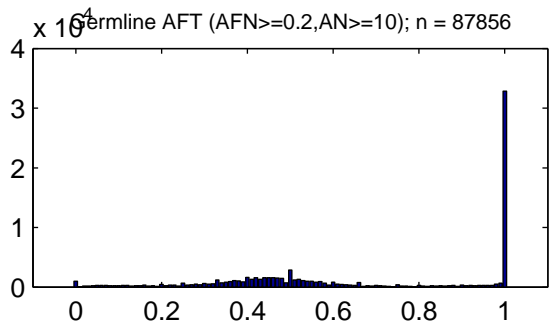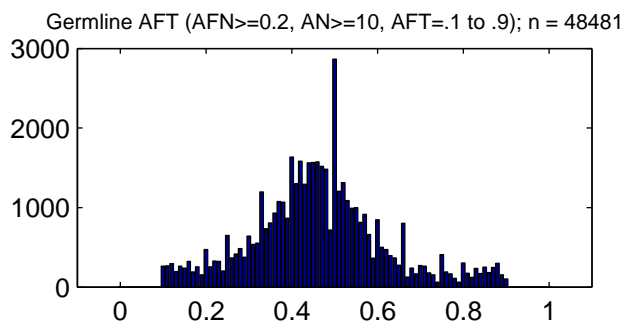

235\_ucsc.edu\_BRCA.IlluminaGA\_DNASeq.Level\_2.10.0.0 -- TCGA-BH-A0HW\_v

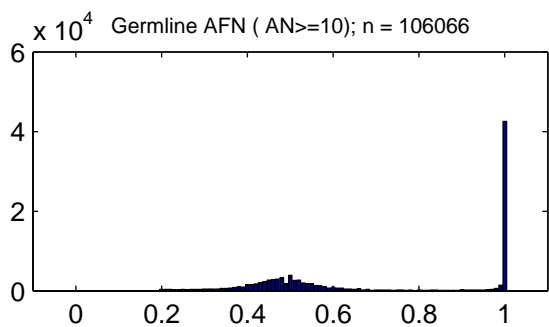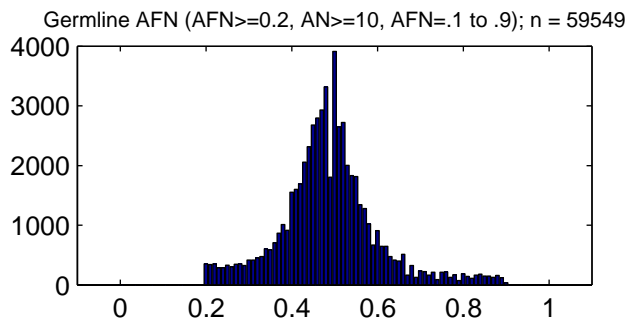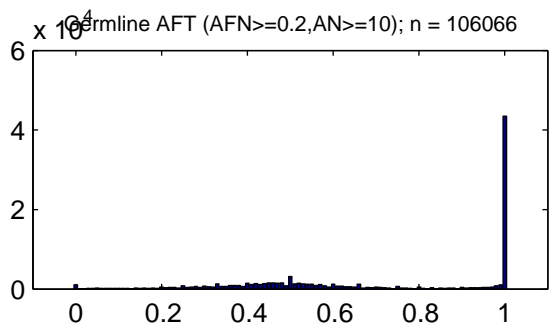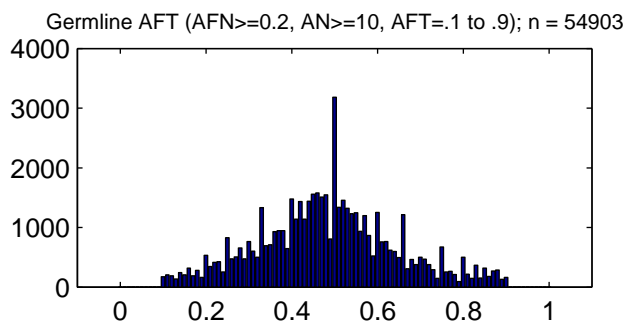

236\_ucsc.edu\_BRCA.IlluminaGA\_DNASeq.Level\_2.11.0.0 -- TCGA-C8-A12X\_C

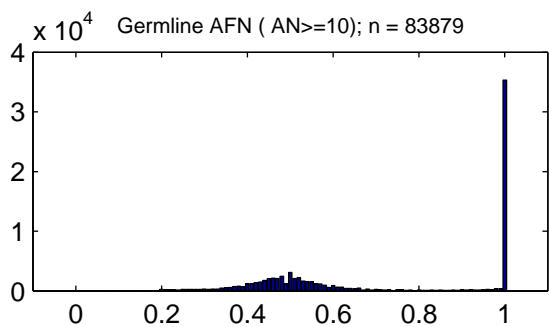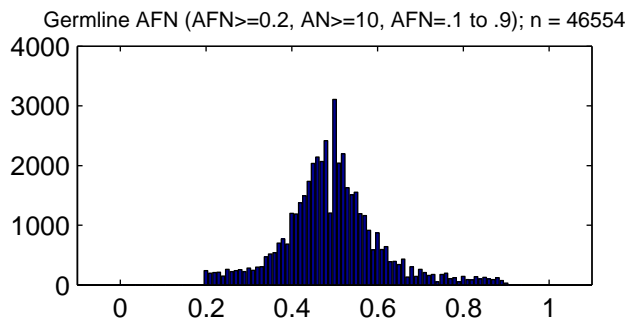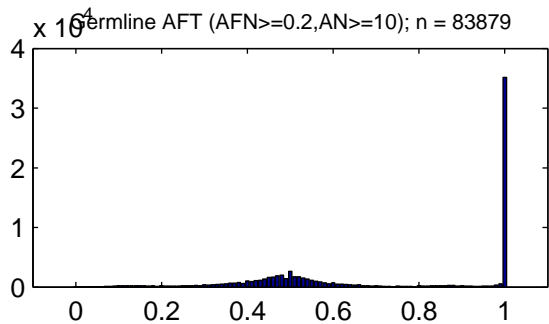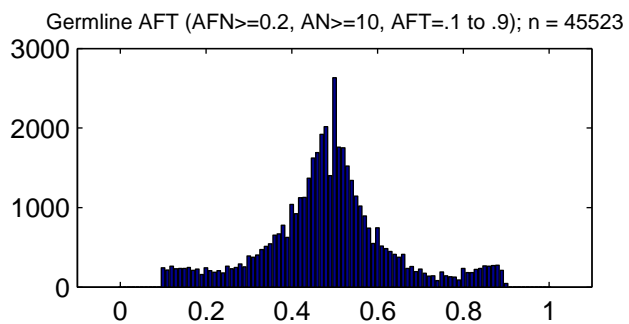

237\_ucsc.edu\_BRCA.IlluminaGA\_DNASeq.Level\_2.10.0.0 -- TCGA-BH-A0EE\_V

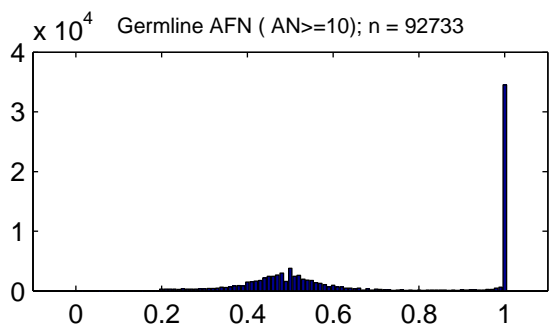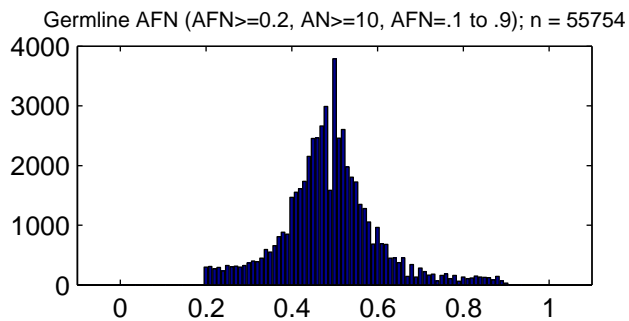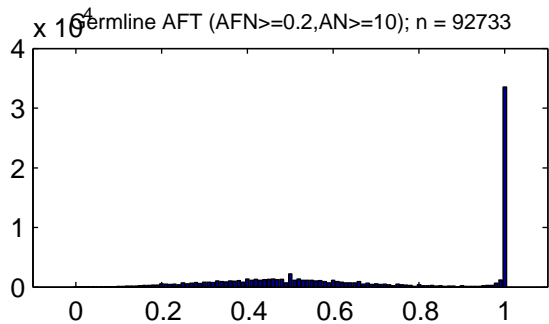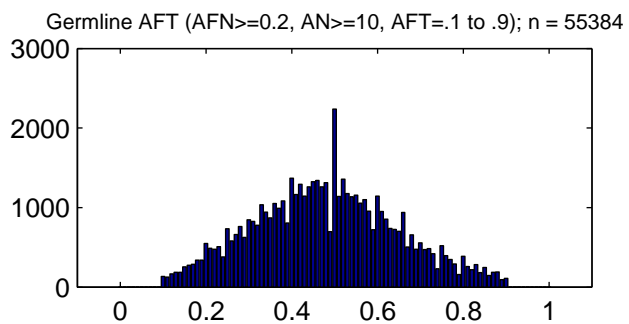

238\_ucsc.edu\_BRCA.IlluminaGA\_DNASeq.Level\_2.4.0.0 -- TCGA-A8-A07P\_W

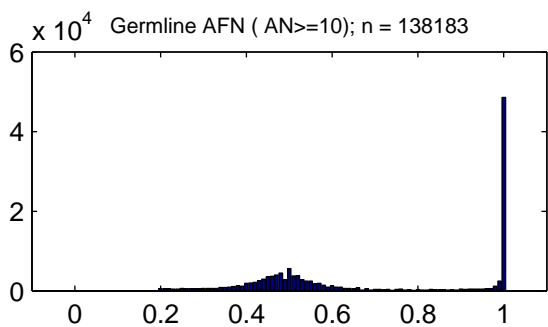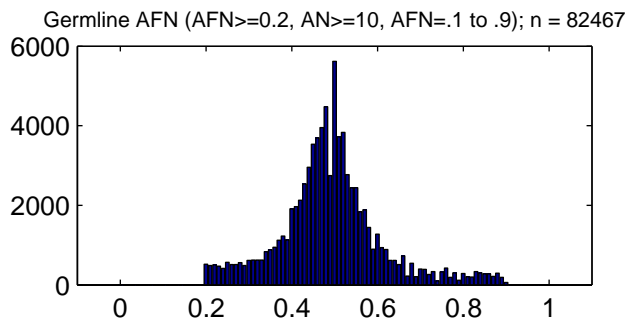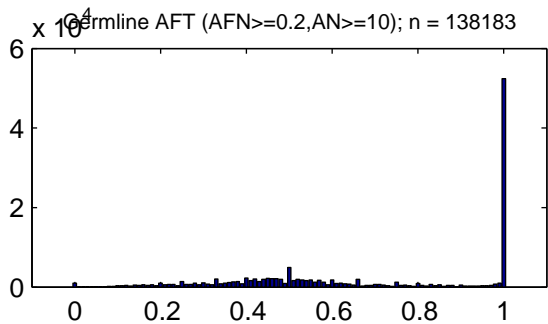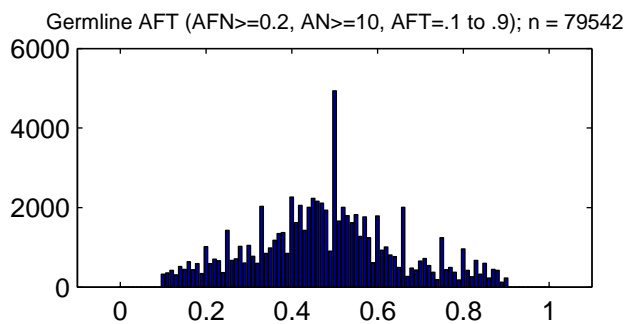

239\_ucsc.edu\_BRCA.IlluminaGA\_DNASeq.Level\_2.9.0.0 -- TCGA-B6-A0WX\_D

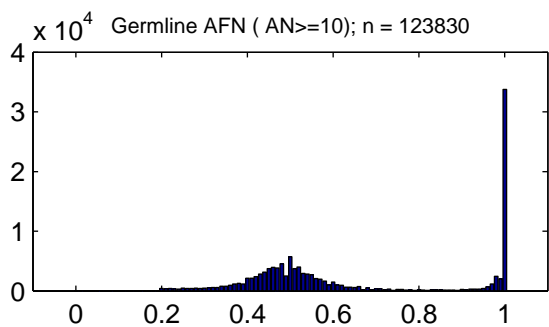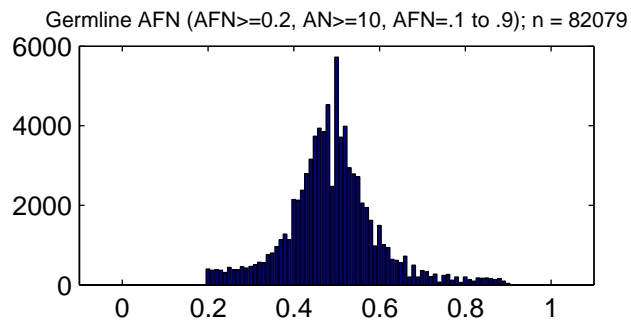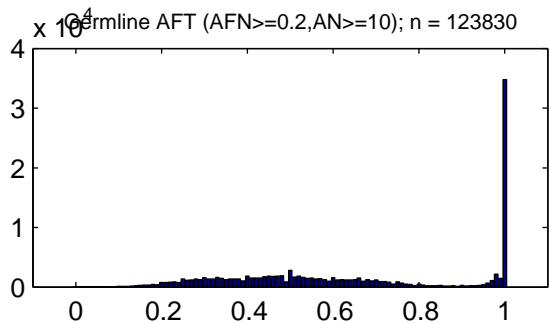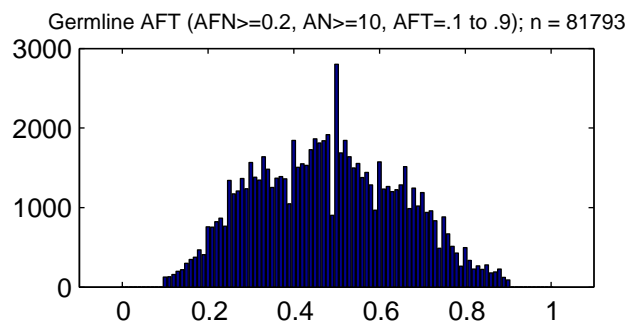



240\_ucsc.edu\_BRCA.IlluminaGA\_DNASeq.Level\_2.13.0.0 -- TCGA-E2-A152\_D

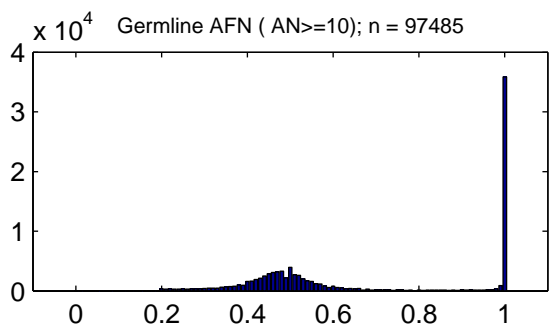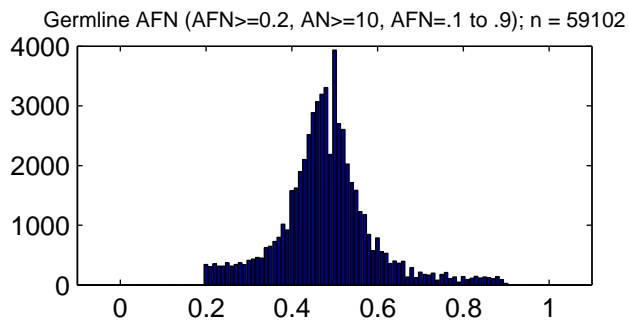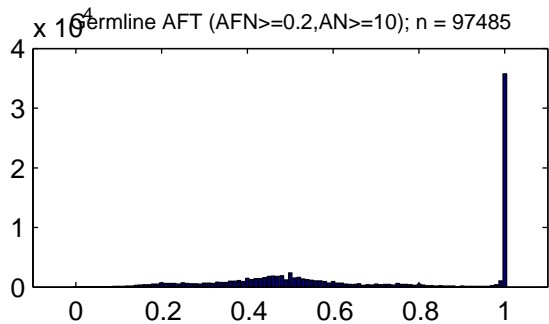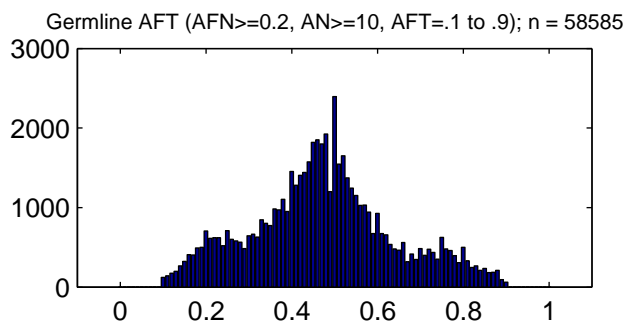

241\_ucsc.edu\_BRCA.IlluminaGA\_DNASeq.Level\_2.10.0.0 -- TCGA-BH-A0GY\_V

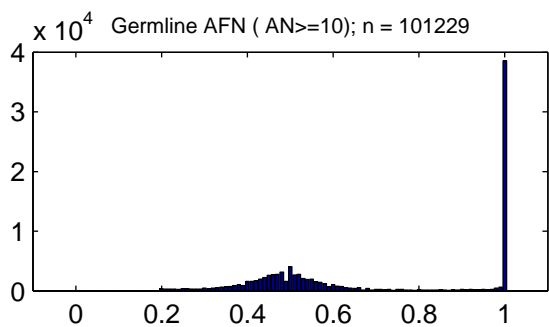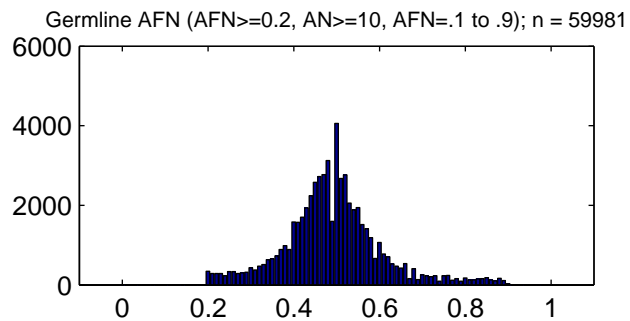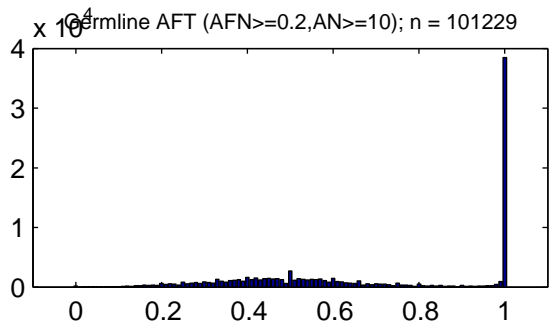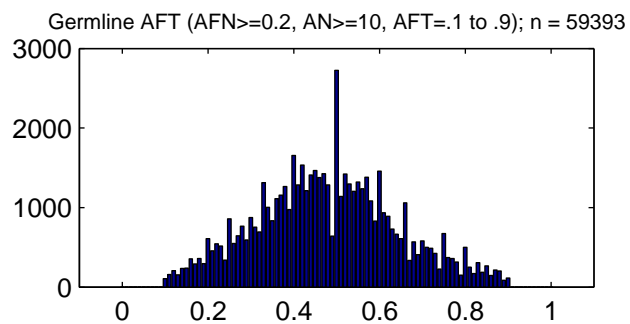

242\_ucsc.edu\_BRCA.IlluminaGA\_DNASeq.Level\_2.9.0.0 -- TCGA-B6-A0RG\_W

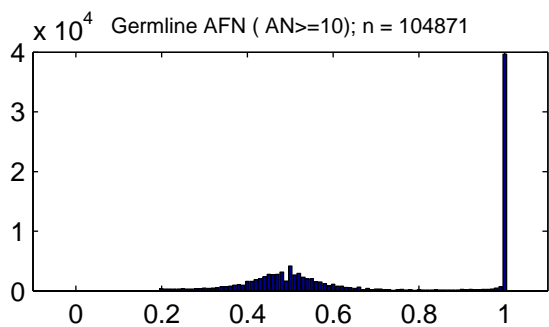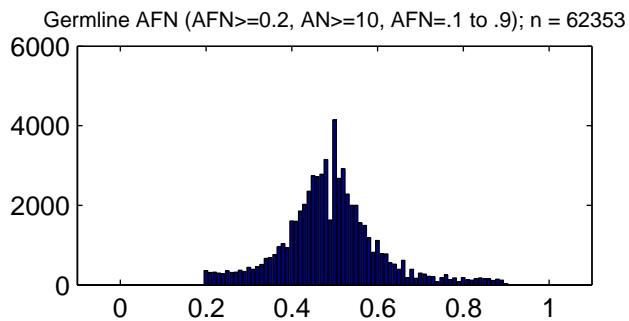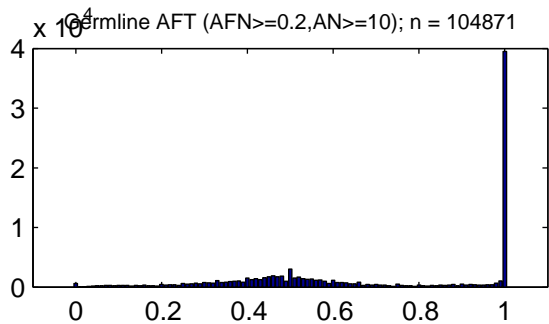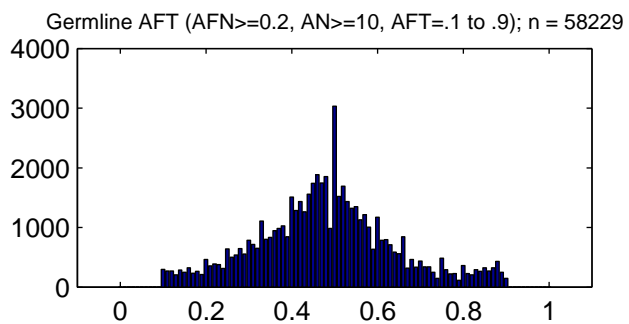

243\_ucsc.edu\_BRCA.IlluminaGA\_DNASeq.Level\_2.13.0.0 -- TCGA-E2-A159\_D

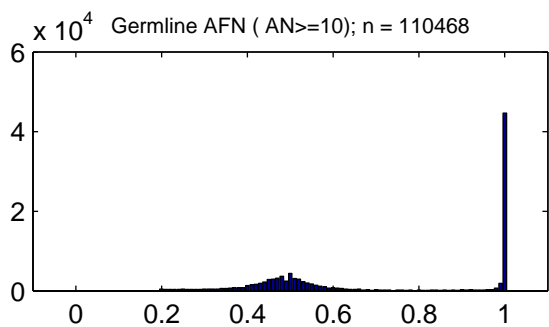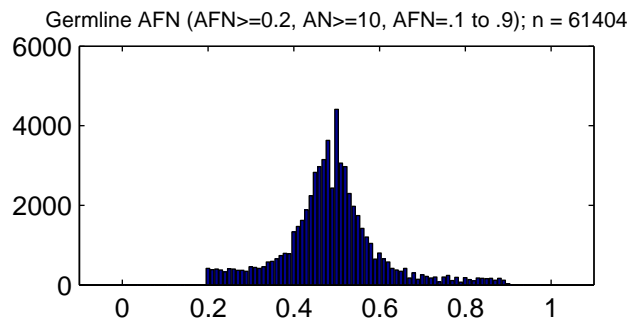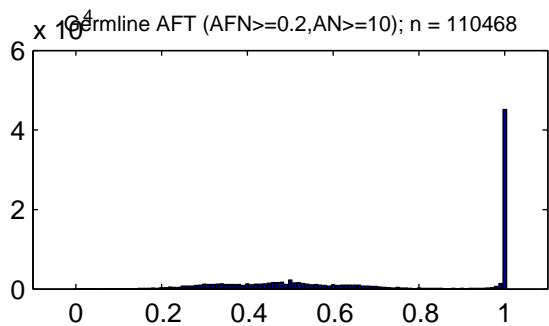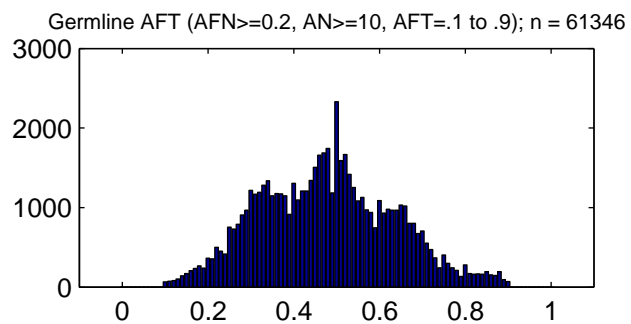

244\_ucsc.edu\_BRCA.IlluminaGA\_DNASeq.Level\_2.4.0.0 -- TCGA-A8-A09B\_W

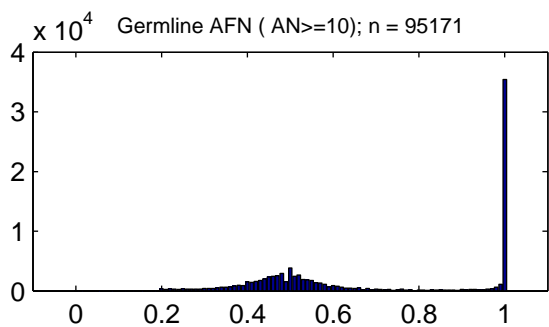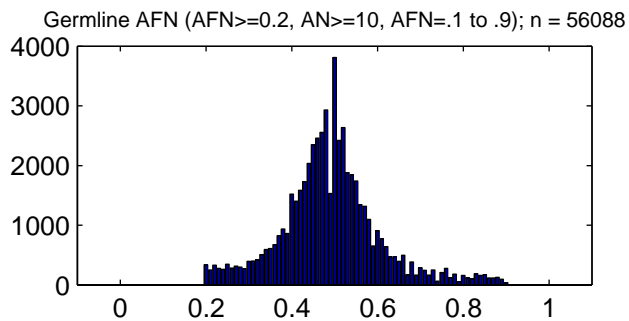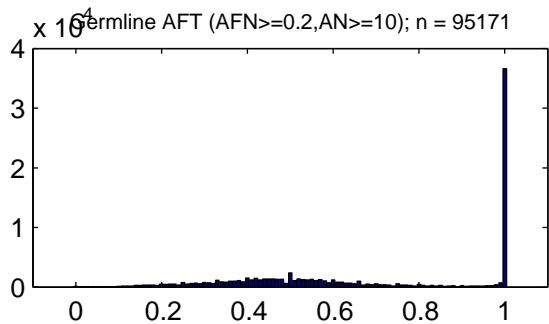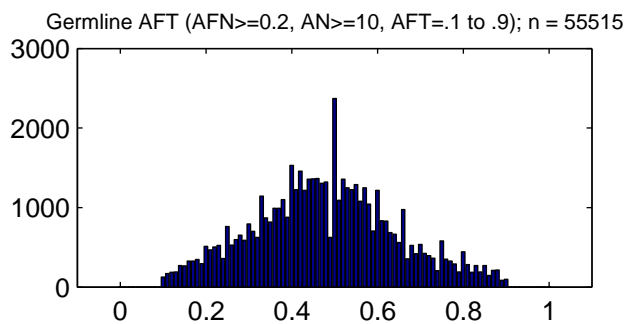

245\_ucsc.edu\_BRCA.IlluminaGA\_DNASeq.Level\_2.4.0.0 -- TCGA-A8-A0A2\_W

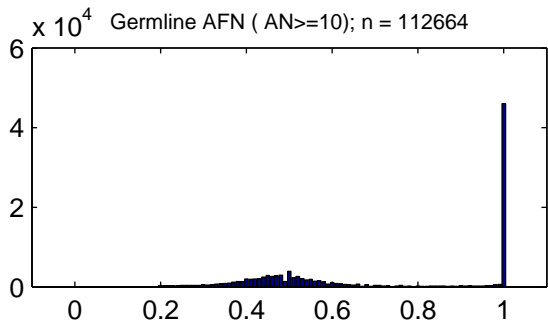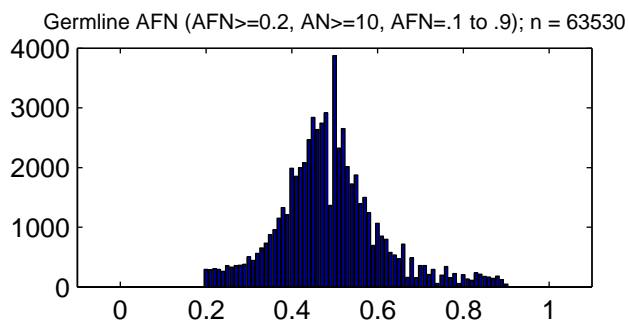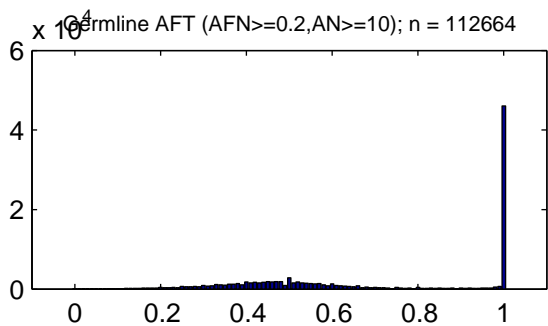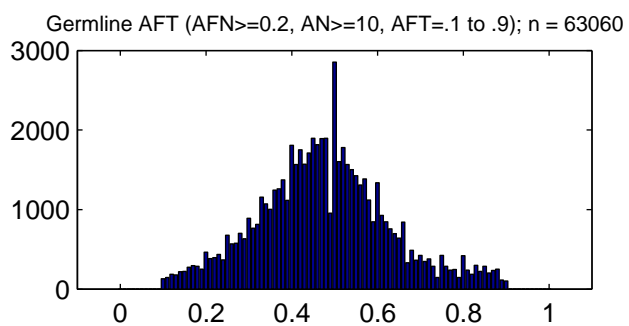

246\_ucsc.edu\_BRCA.IlluminaGA\_DNASeq.Level\_2.6.0.0 -- TCGA-AO-A129\_D

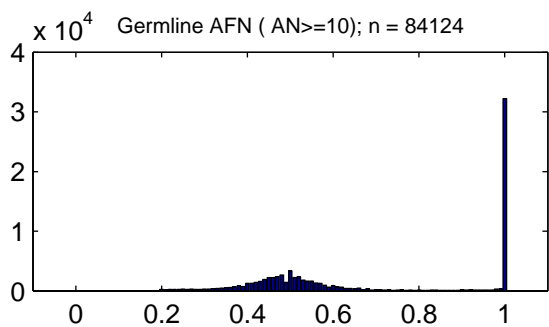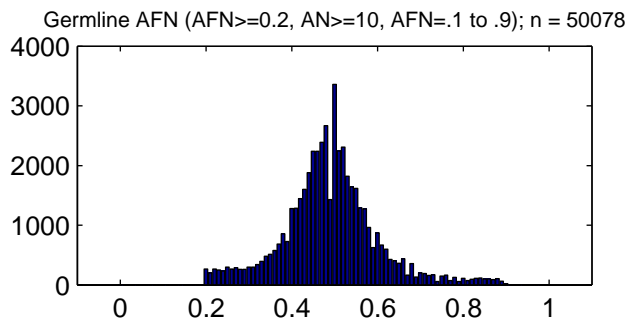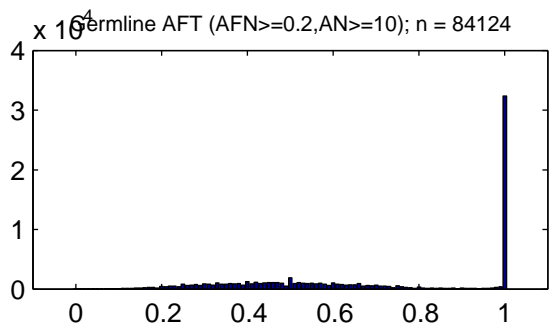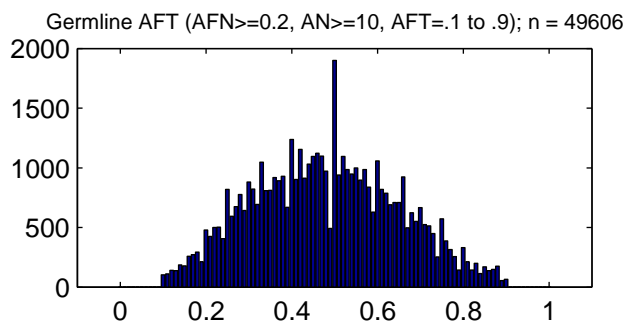

247\_ucsc.edu\_BRCA.IlluminaGA\_DNASeq.Level\_2.8.0.0 -- TCGA-AR-A1AV\_D

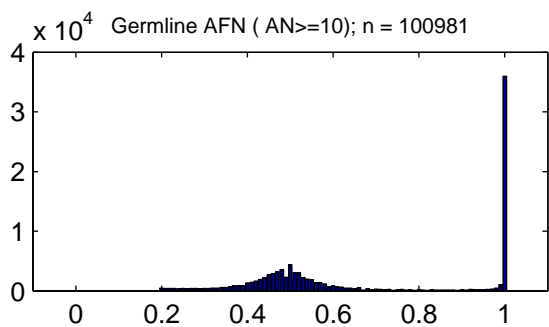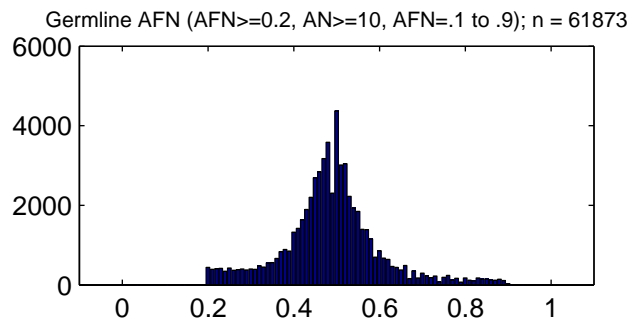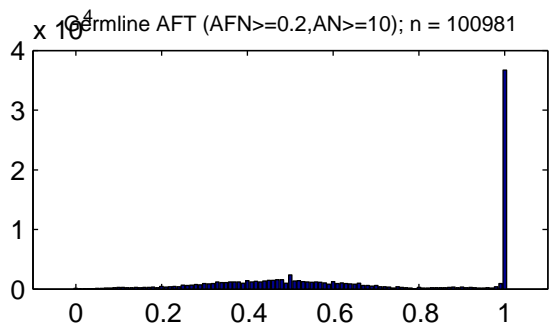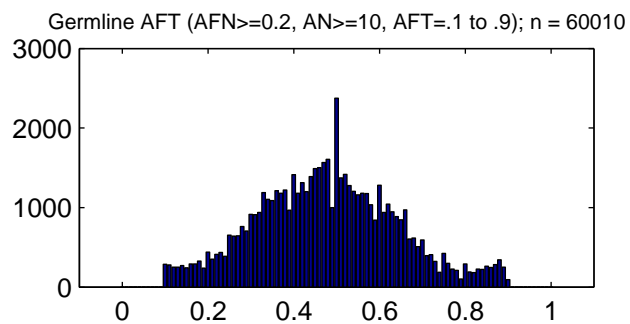



248\_ucsc.edu\_BRCA.IlluminaGA\_DNASeq.Level\_2.6.0.0 -- TCGA-AO-A12G\_D

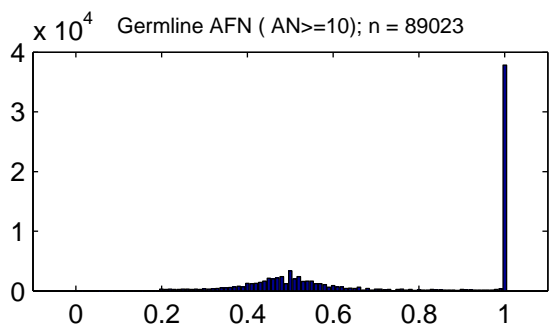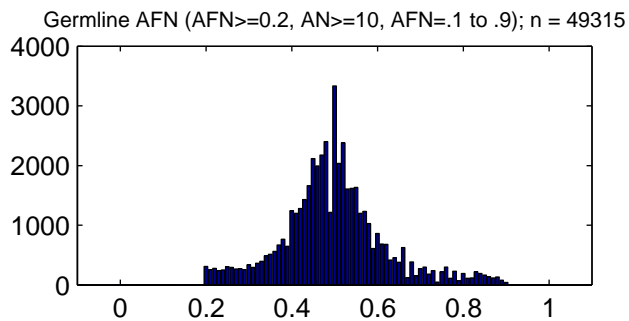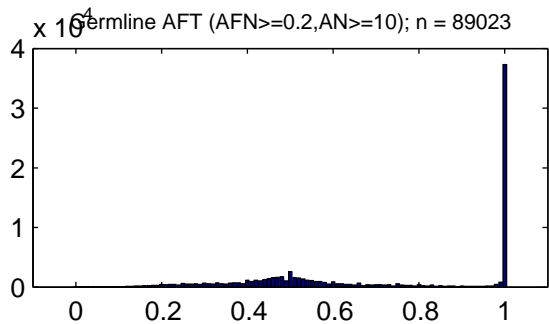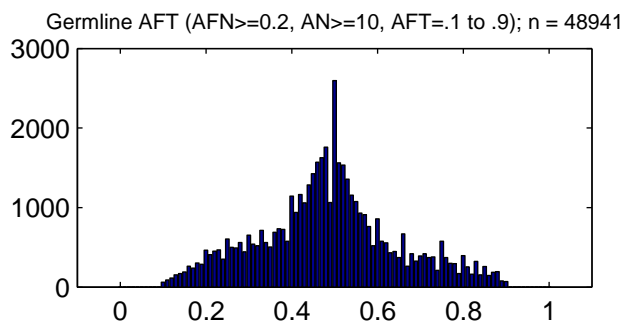

249\_ucsc.edu\_BRCA.IlluminaGA\_DNASeq.Level\_2.11.0.0 --- TCGA-C8-A12Q\_C

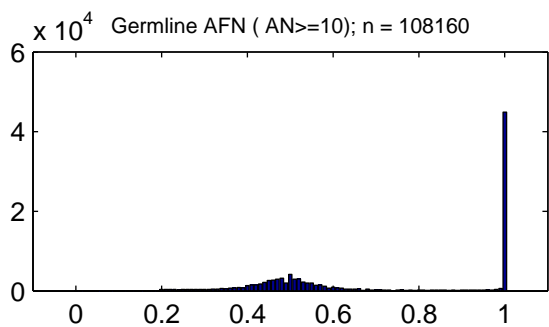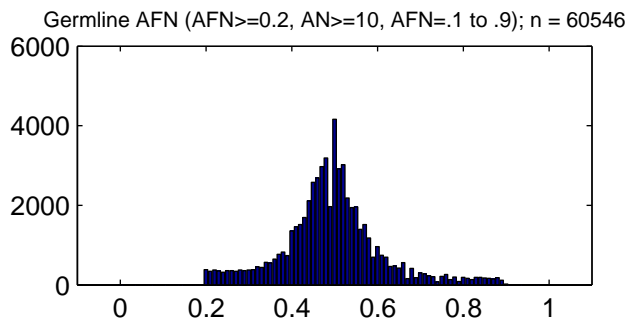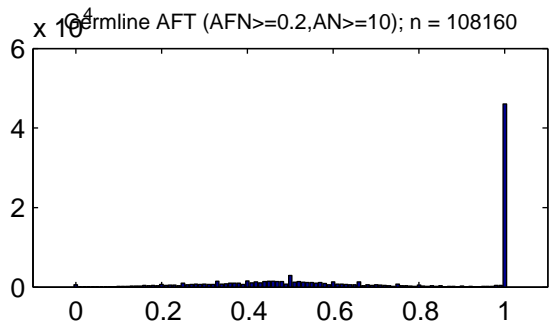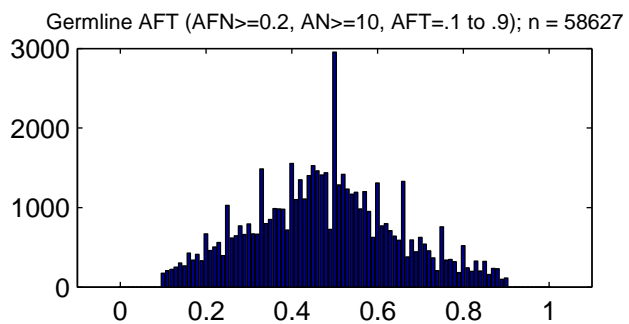

250\_ucsc.edu\_BRCA.IlluminaGA\_DNASeq.Level\_2.9.0.0 -- TCGA-B6-A0RP\_D

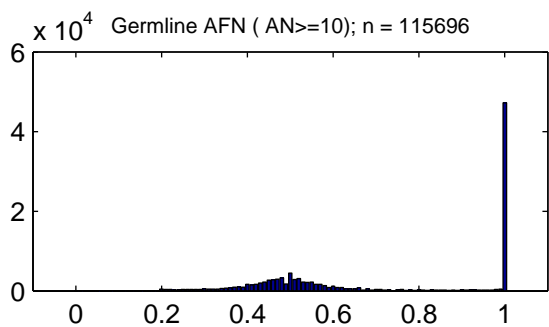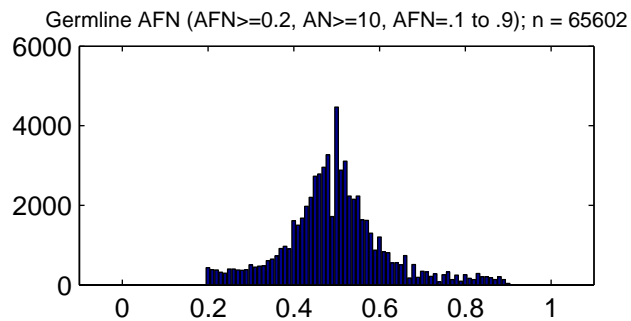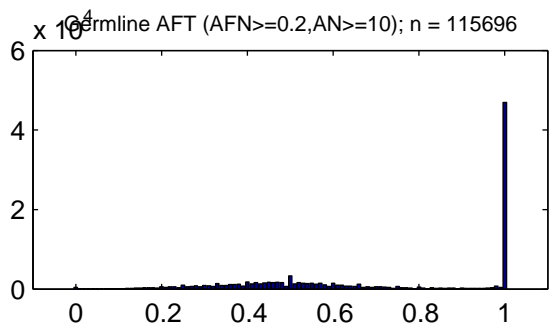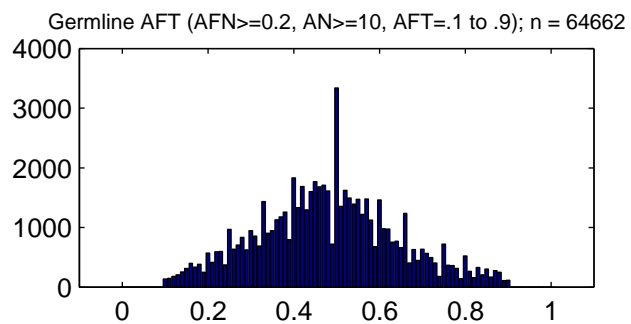

251\_ucsc.edu\_BRCA.IlluminaGA\_DNASeq.Level\_2.5.0.0 -- TCGA-AN-A0FK\_W

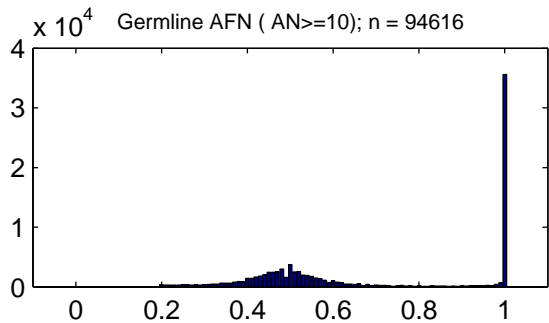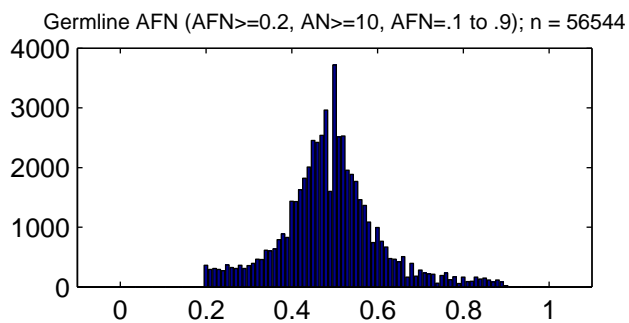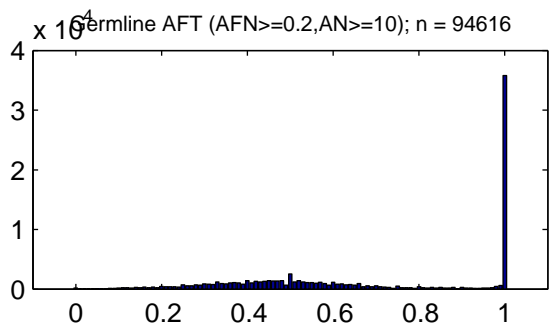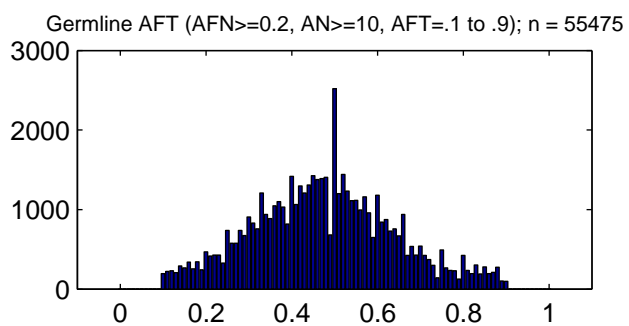

252\_ucsc.edu\_BRCA.IlluminaGA\_DNASeq.Level\_2.10.0.0 -- TCGA-BH-A0DH\_I

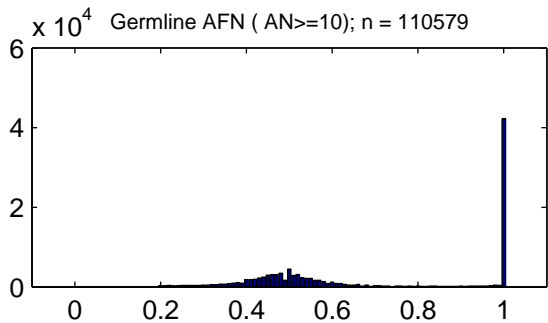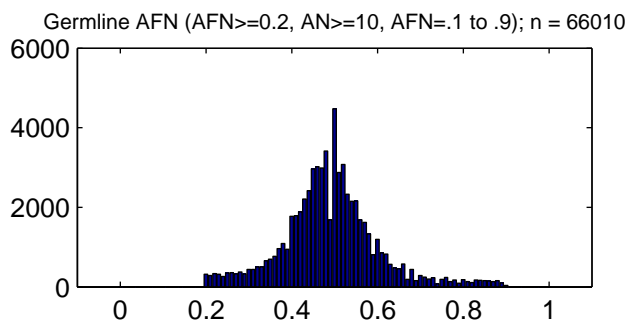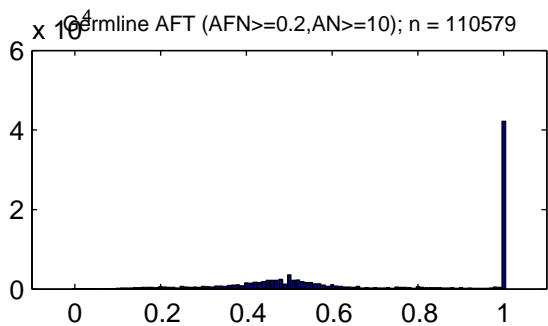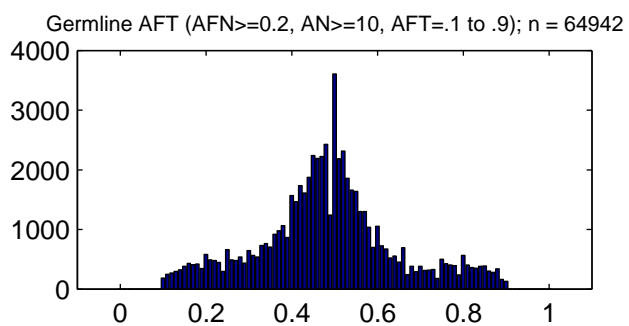

253\_ucsc.edu\_BRCA.IlluminaGA\_DNASeq.Level\_2.4.0.0 -- TCGA-A8-A08T\_W

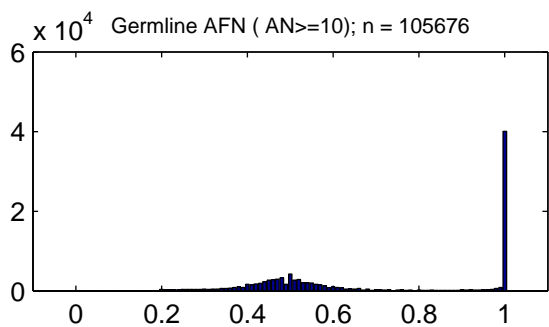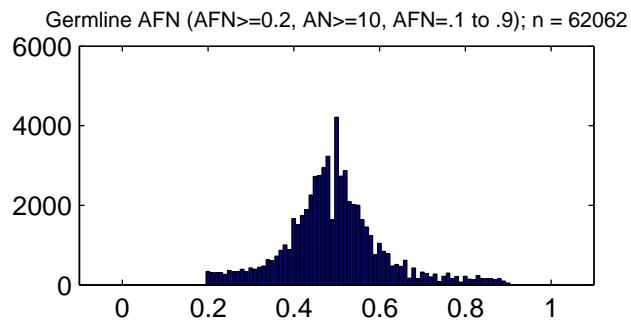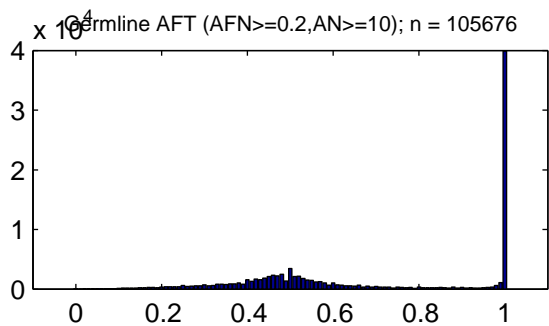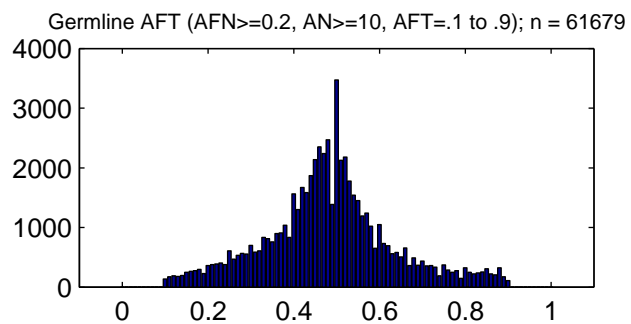

254\_ucsc.edu\_BRCA.IlluminaGA\_DNASeq.Level\_2.4.0.0 -- TCGA-A8-A099\_W

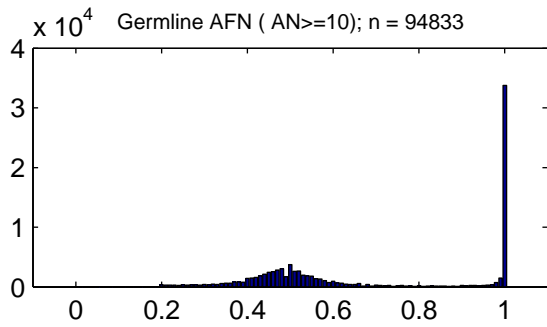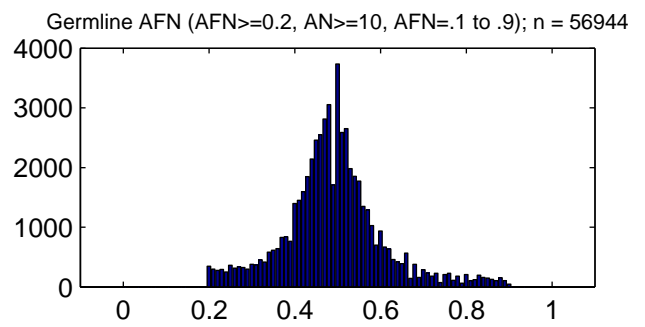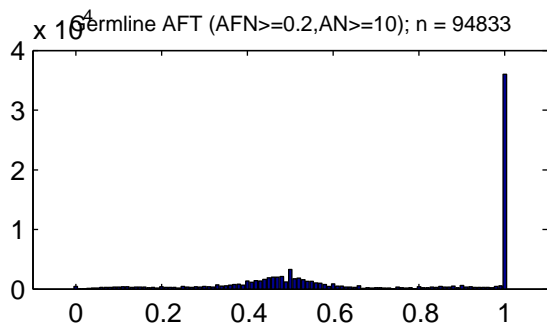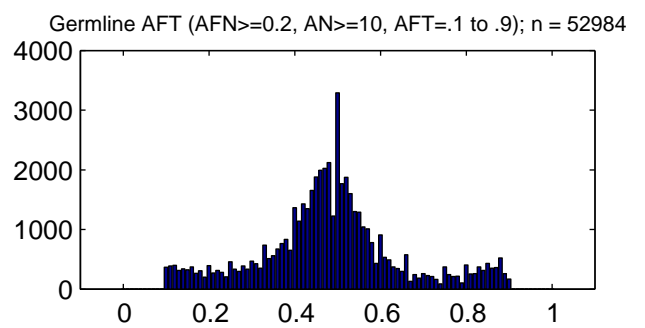

255\_ucsc.edu\_BRCA.IlluminaGA\_DNASeq.Level\_2.5.0.0 -- TCGA-AN-A0AK\_W

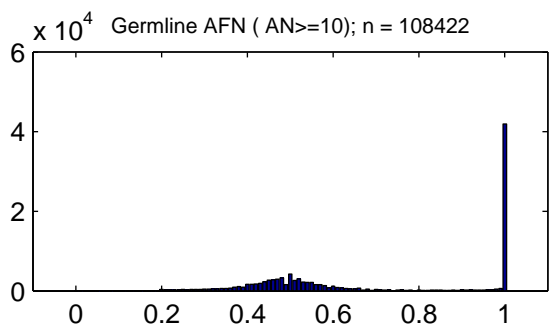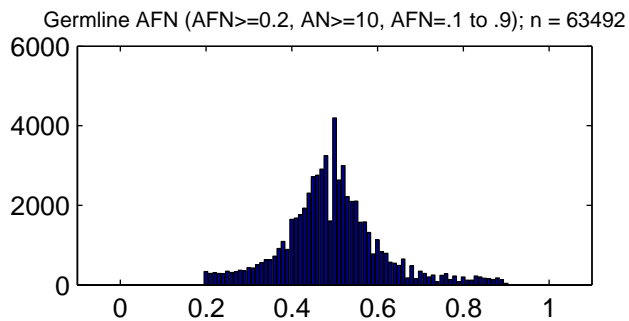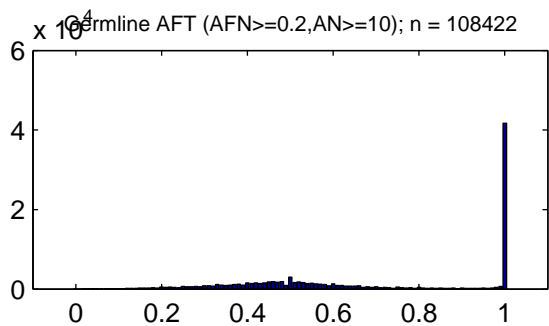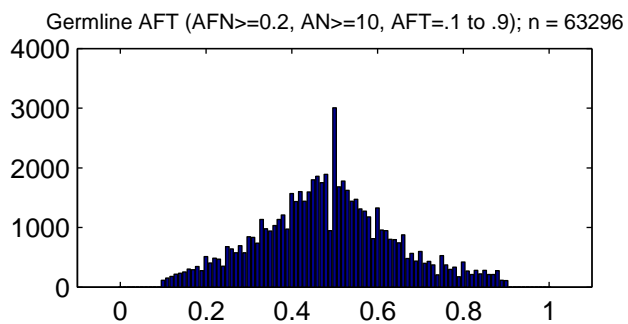



256\_ucsc.edu\_BRCA.IlluminaGA\_DNASeq.Level\_2.13.0.0 -- TCGA-E2-A14S\_C

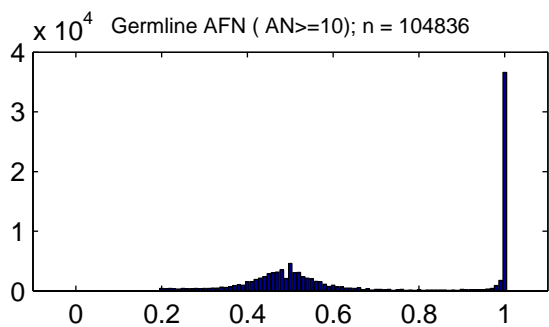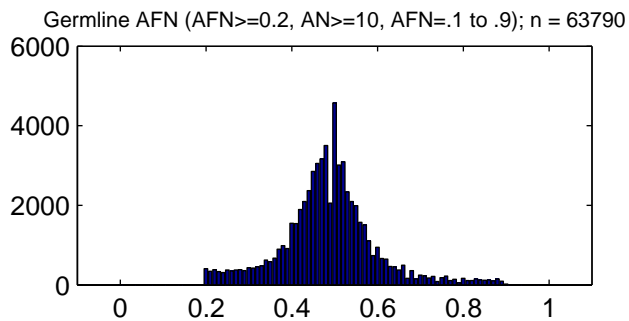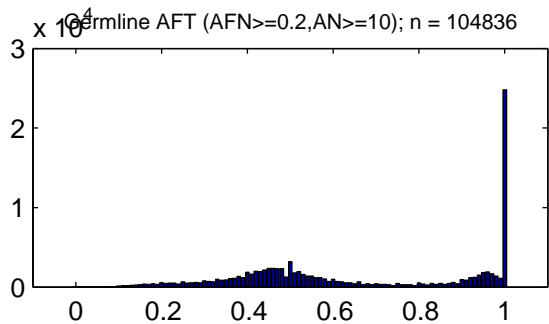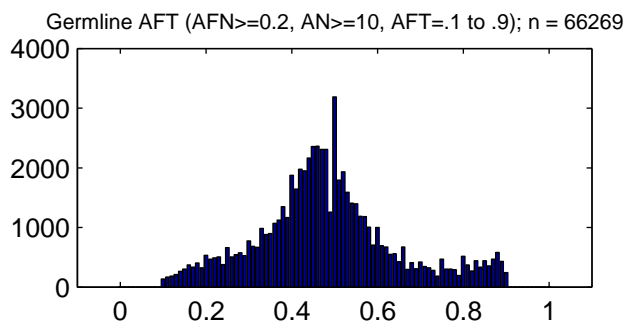

257\_ucsc.edu\_BRCA.IlluminaGA\_DNASeq.Level\_2.6.0.0 -- TCGA-AO-A0J4\_W

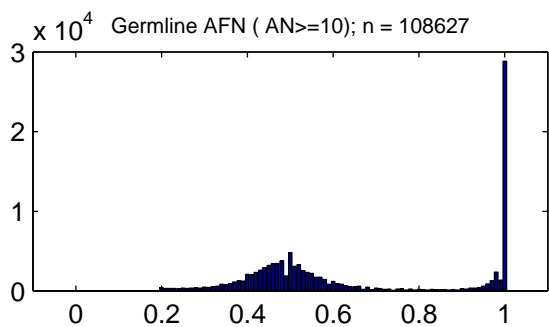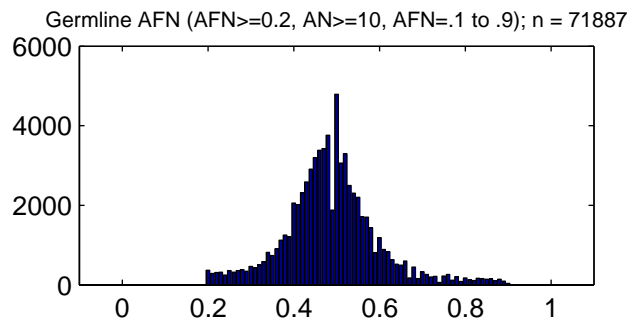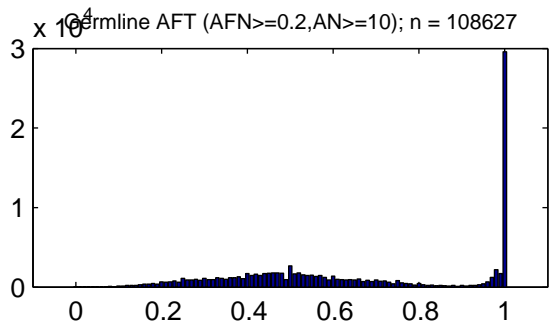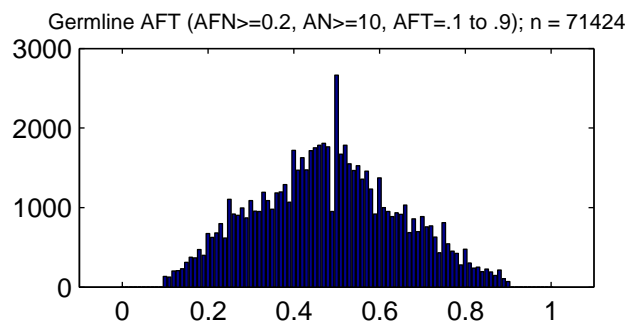

258\_ucsc.edu\_BRCA.IlluminaGA\_DNASeq.Level\_2.10.0.0 -- TCGA-BH-A0AW\_v

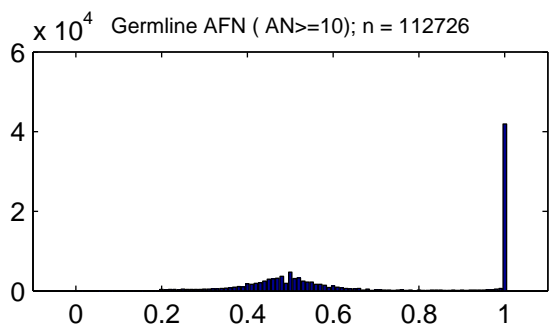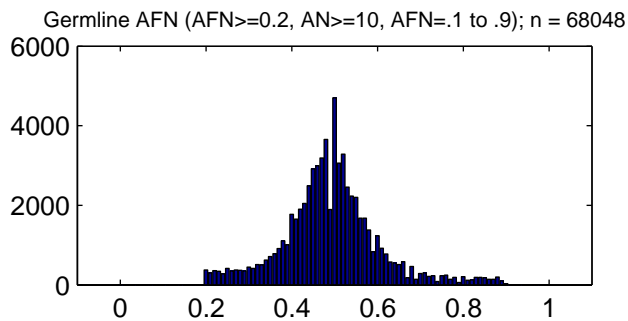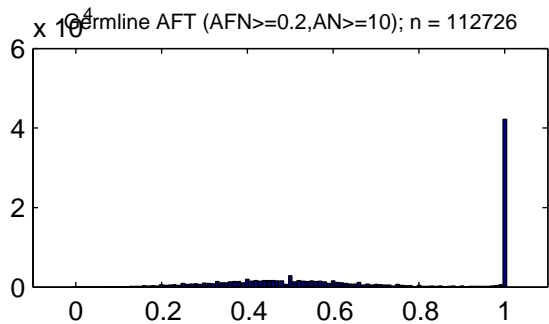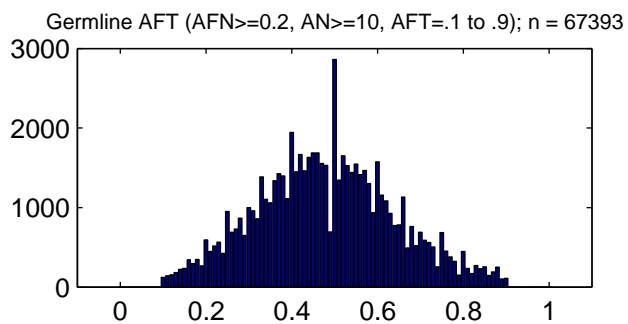

259\_ucsc.edu\_BRCA.IlluminaGA\_DNASeq.Level\_2.13.0.0 -- TCGA-E2-A15F\_D

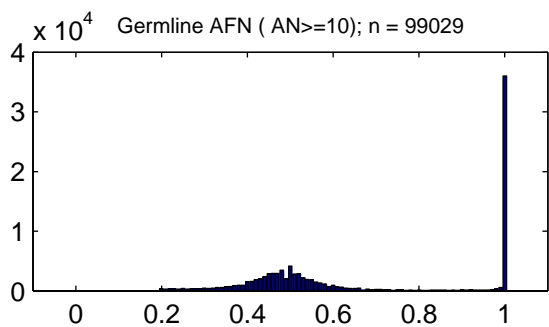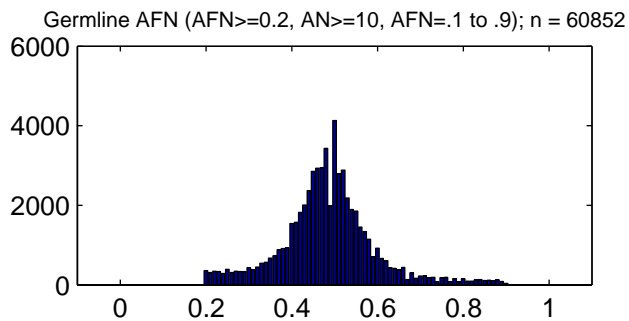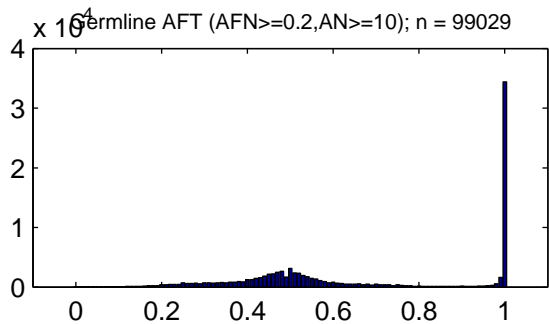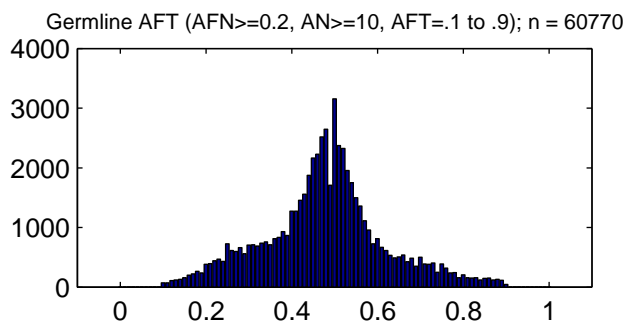

260\_ucsc.edu\_BRCA.IlluminaGA\_DNASeq.Level\_2.2.0.0 -- TCGA-A2-A0CS\_D

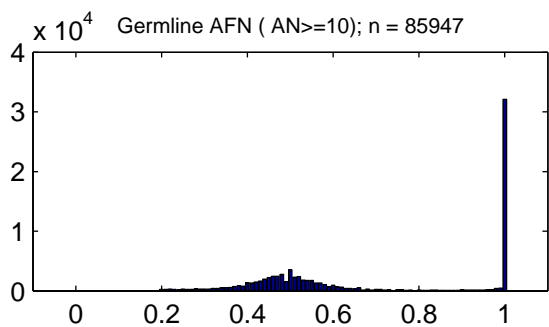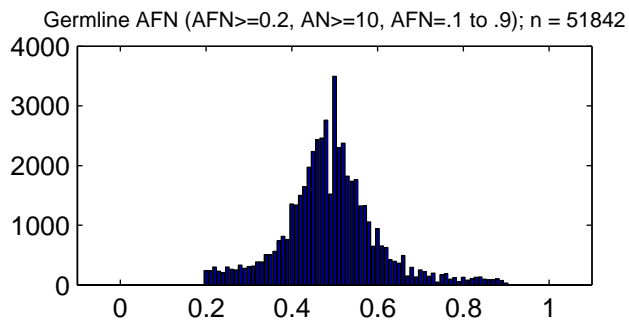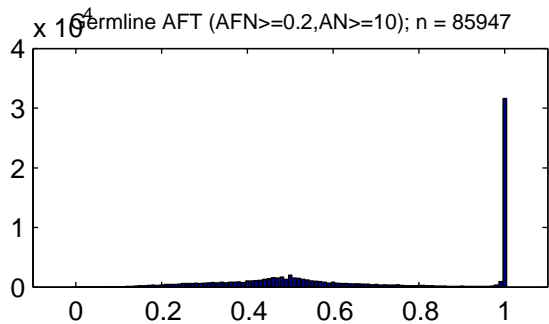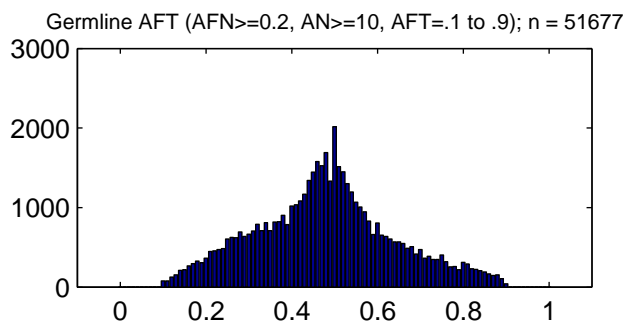

261\_ucsc.edu\_BRCA.IlluminaGA\_DNASeq.Level\_2.4.0.0 -- TCGA-A8-A08P\_W

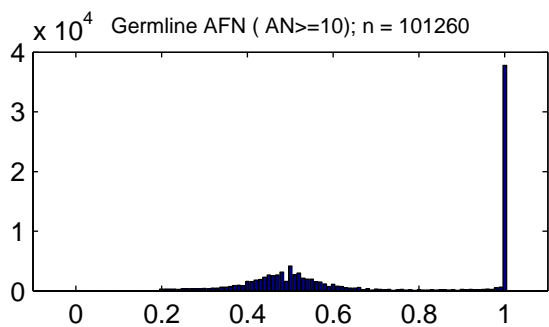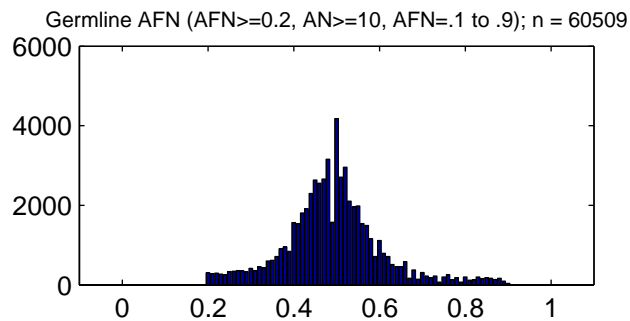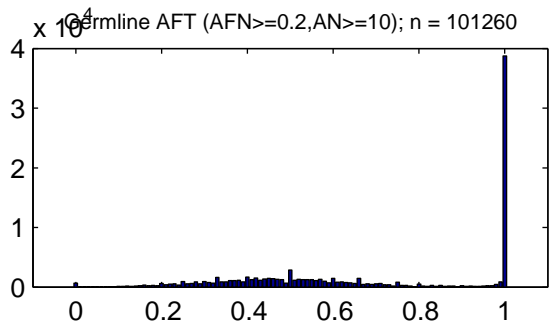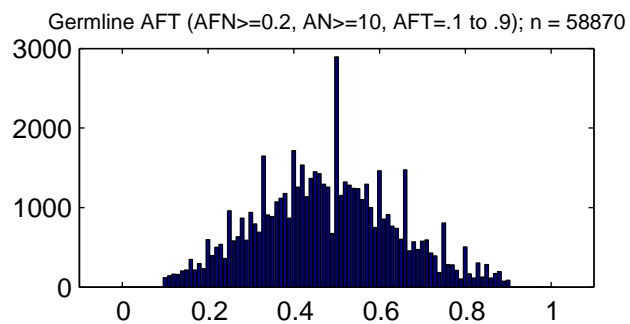

262\_ucsc.edu\_BRCA.IlluminaGA\_DNASeq.Level\_2.14.0.0 -- TCGA-BH-A0W3\_V

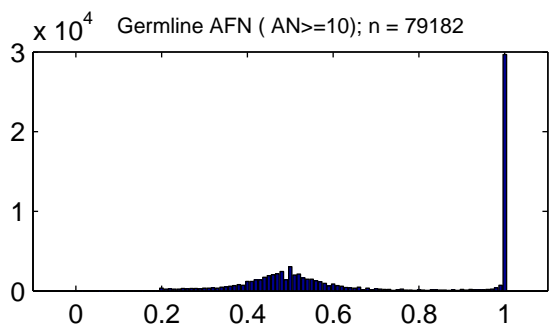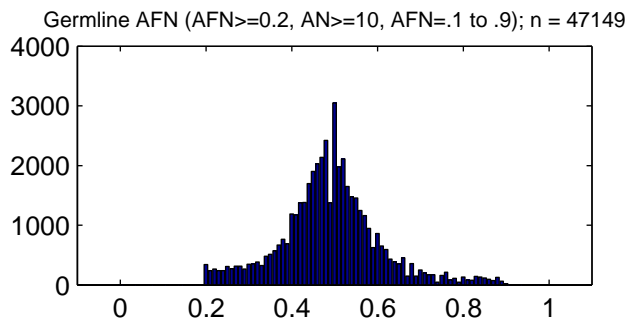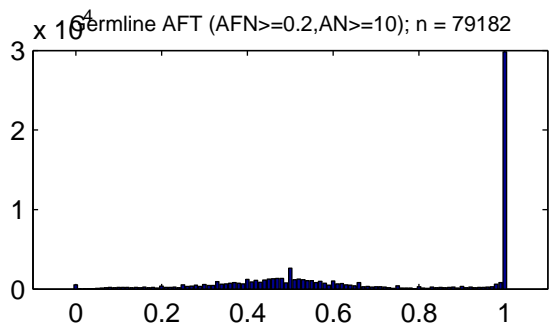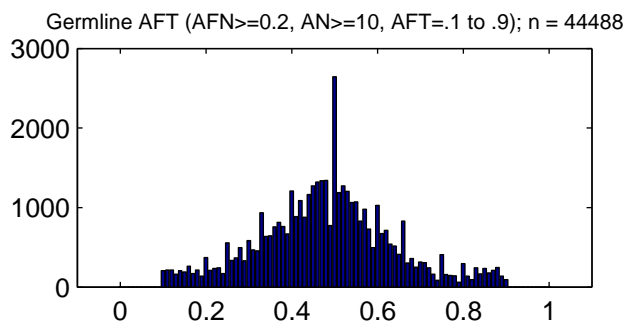

263\_ucsc.edu\_BRCA.IlluminaGA\_DNASeq.Level\_2.6.0.0 -- TCGA-AO-A0JI\_W

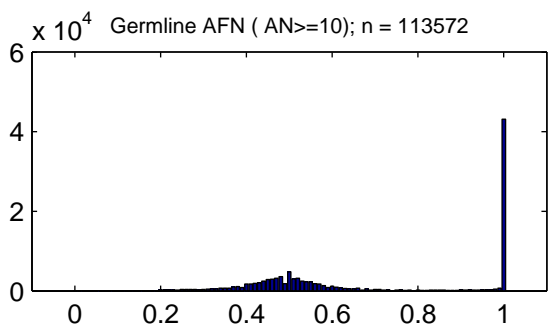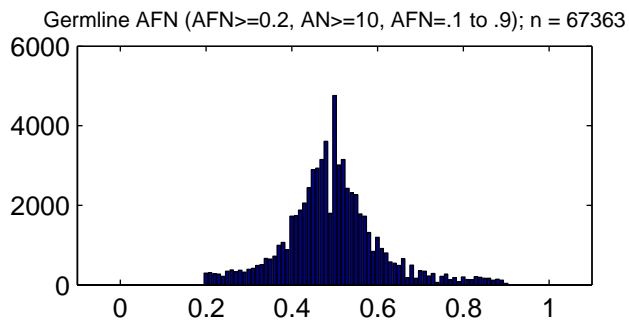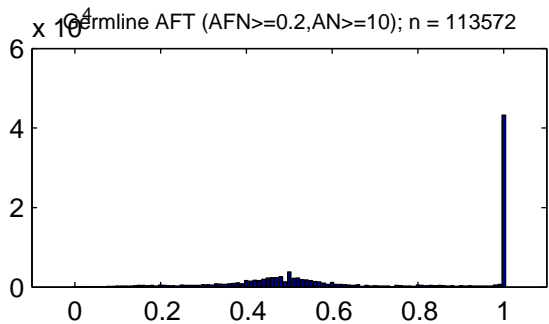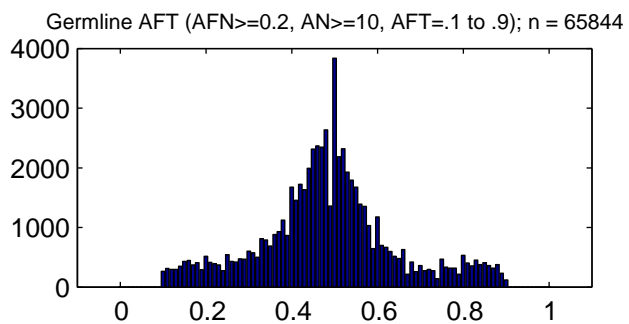



264\_ucsc.edu\_BRCA.IlluminaGA\_DNASeq.Level\_2.8.0.0 -- TCGA-AR-A1AS\_D

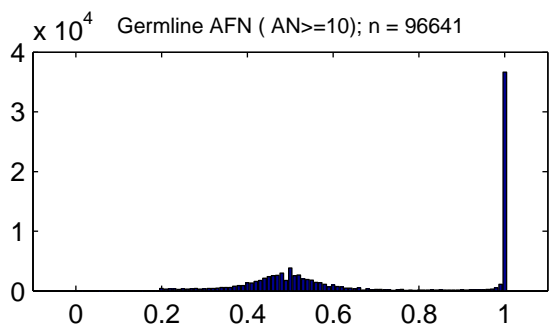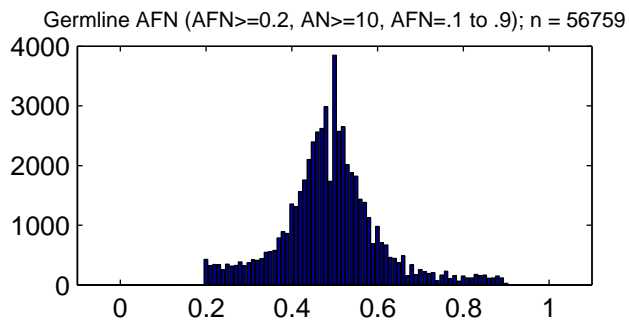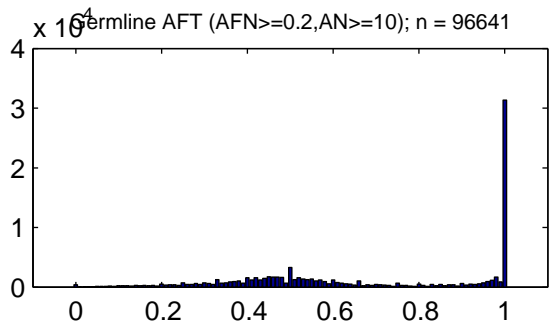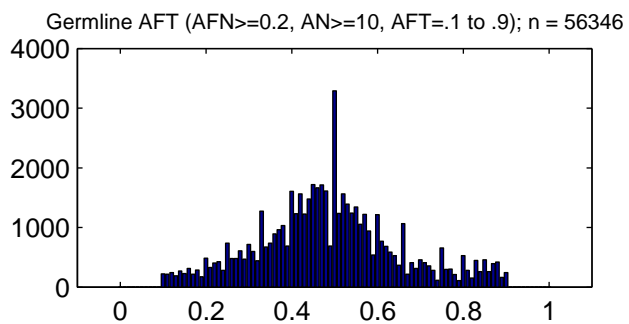

265\_ucsc.edu\_BRCA.IlluminaGA\_DNASeq.Level\_2.10.0.0 -- TCGA-BH-A0HB\_V

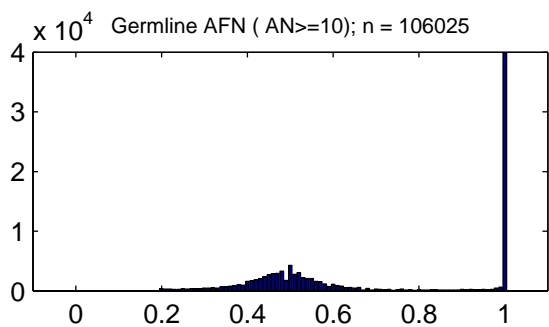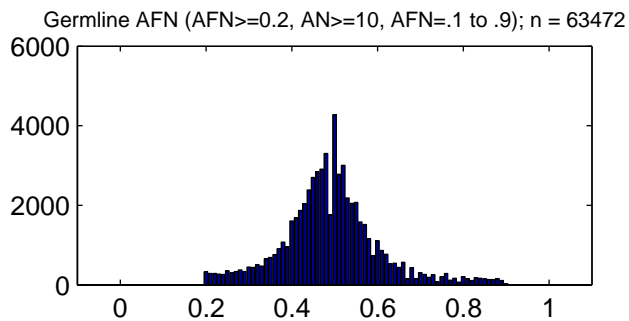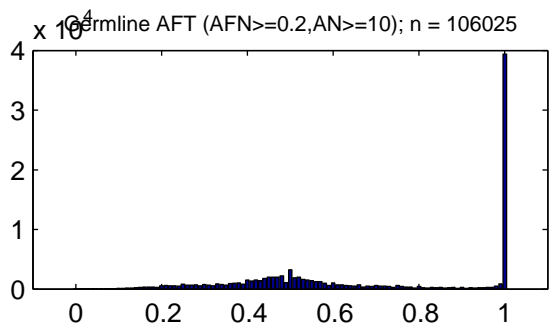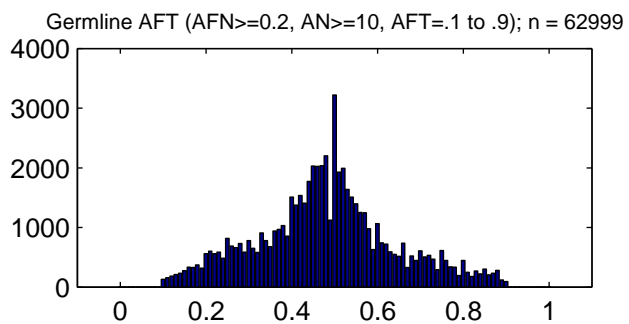

266\_ucsc.edu\_BRCA.IlluminaGA\_DNASeq.Level\_2.4.0.0 -- TCGA-A8-A09A\_W

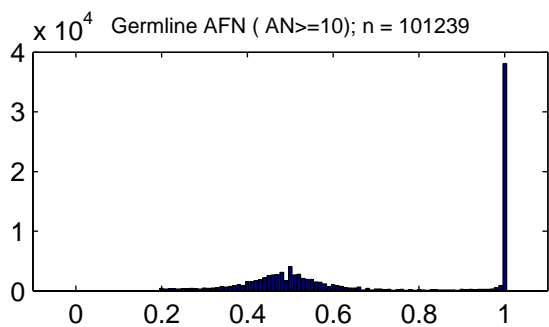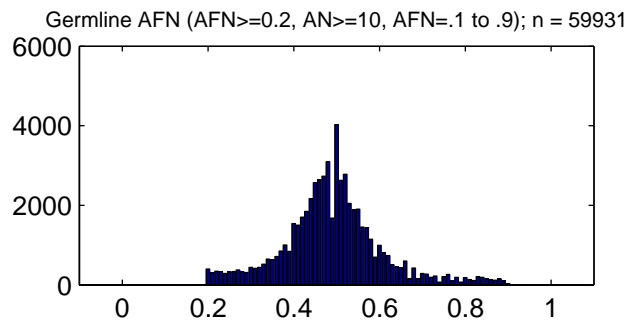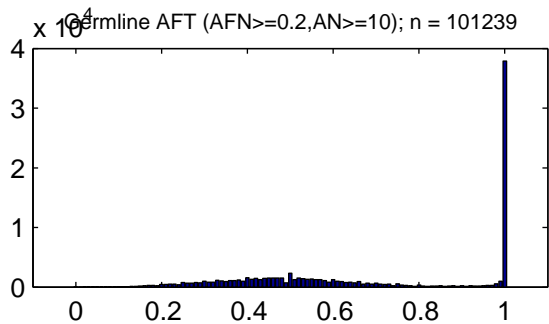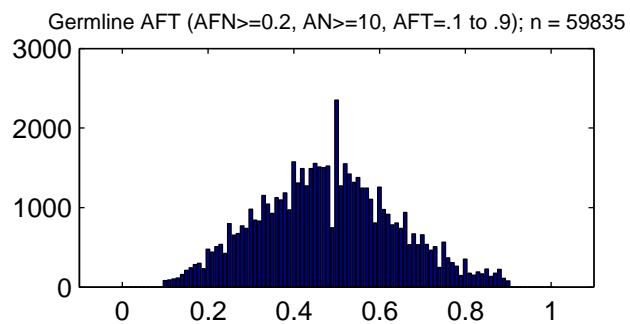

267\_ucsc.edu\_BRCA.IlluminaGA\_DNASeq.Level\_2.11.0.0 --- TCGA-C8-A1HL\_C

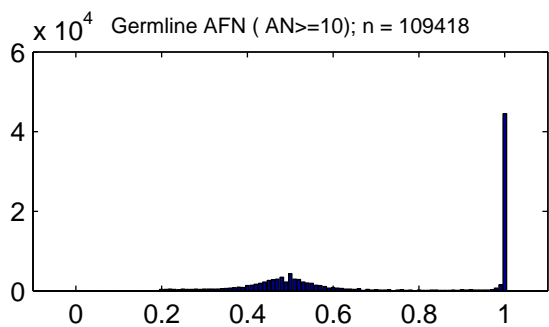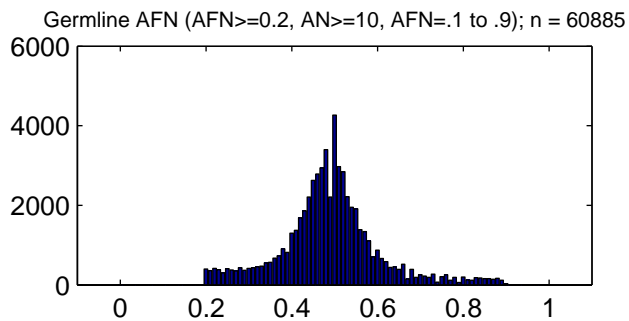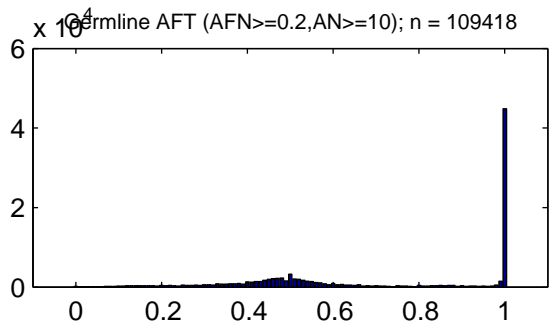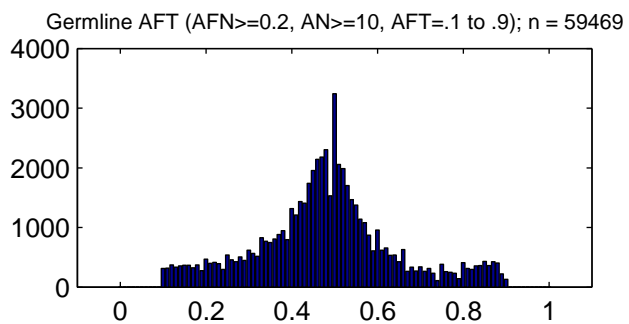

268\_ucsc.edu\_BRCA.IlluminaGA\_DNASeq.Level\_2.2.0.0 -- TCGA-A2-A0YG\_D

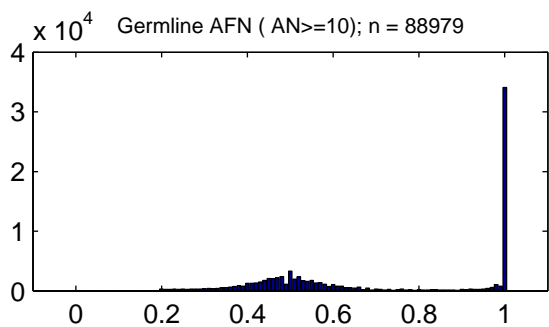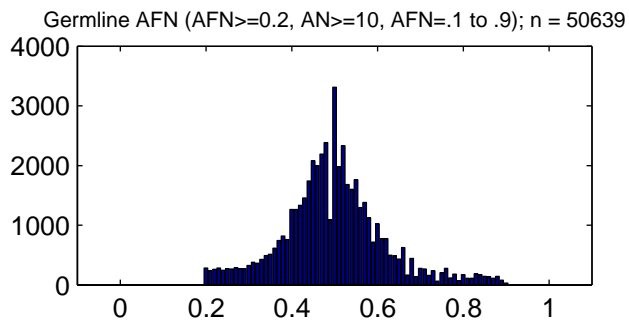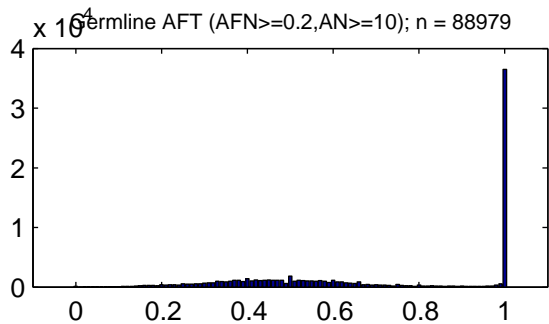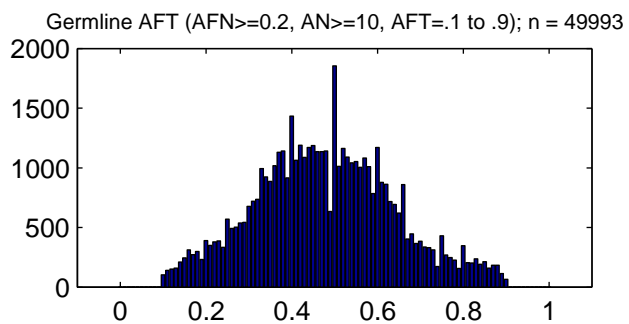

269\_ucsc.edu\_BRCA.IlluminaGA\_DNASeq.Level\_2.8.0.0 -- TCGA-AR-A1AR\_D

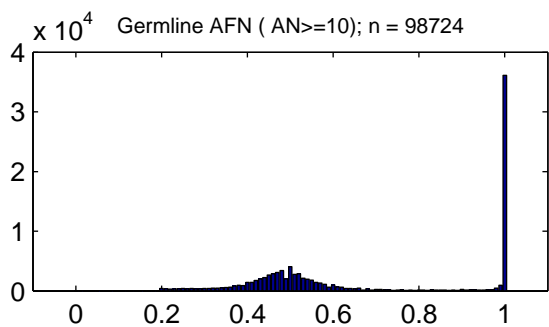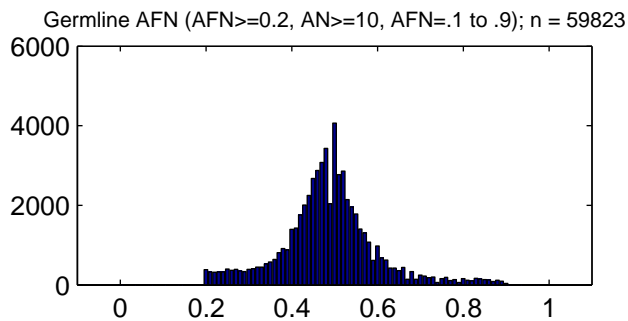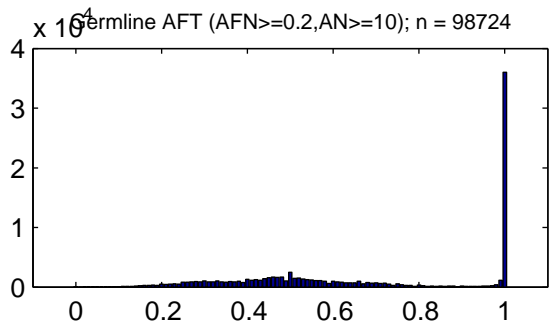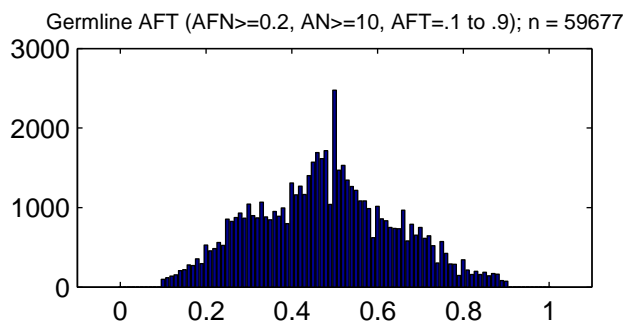

270\_ucsc.edu\_BRCA.IlluminaGA\_DNASeq.Level\_2.10.0.0 -- TCGA-BH-A0C1\_C

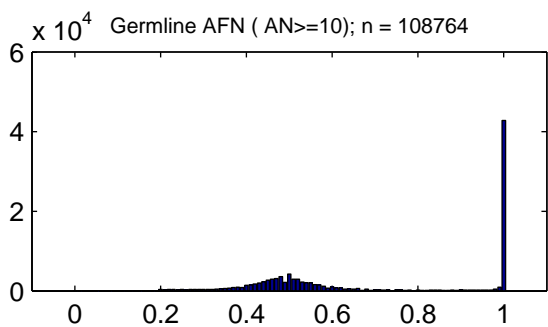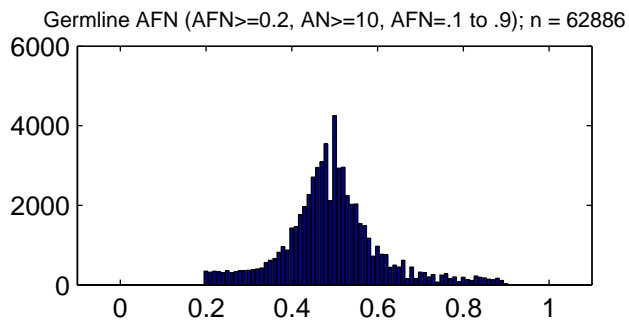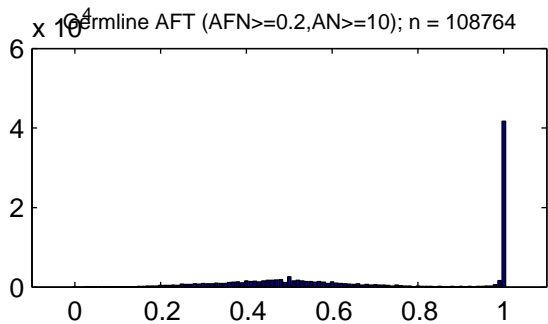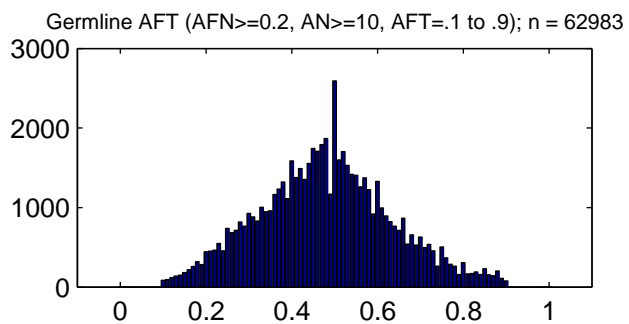

271\_ucsc.edu\_BRCA.IlluminaGA\_DNASeq.Level\_2.6.0.0 -- TCGA-AO-A0JG\_D

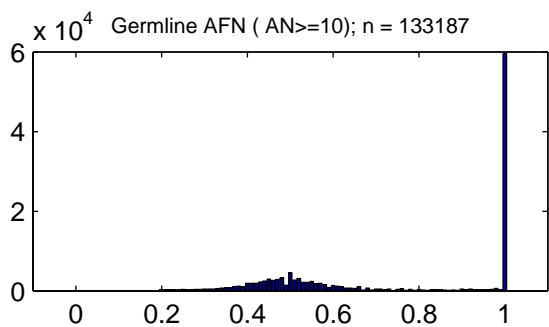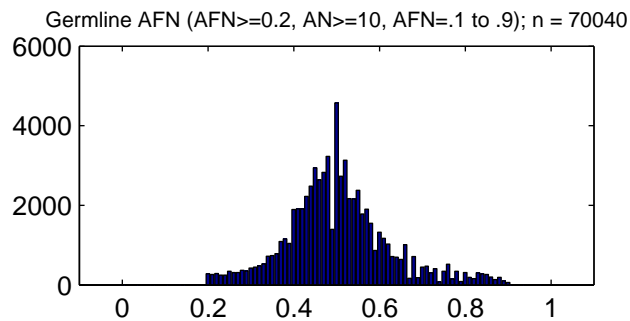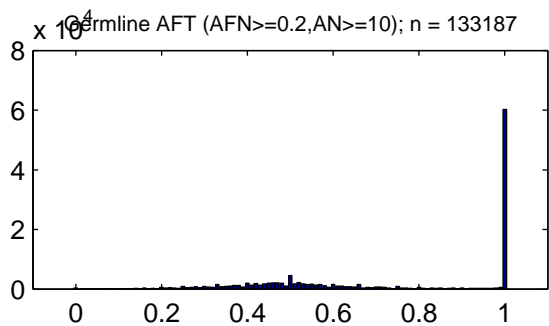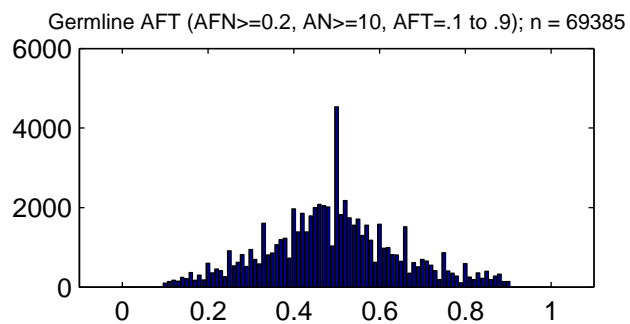



272\_ucsc.edu\_BRCA.IlluminaGA\_DNASeq.Level\_2.8.0.0 -- TCGA-AR-A0TR\_D

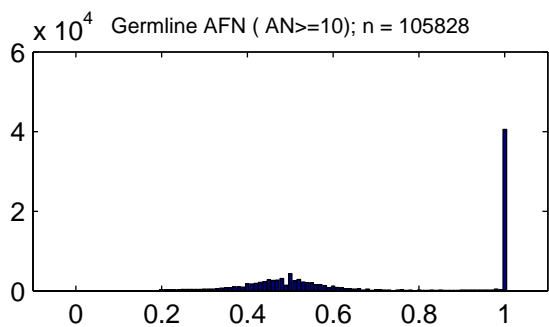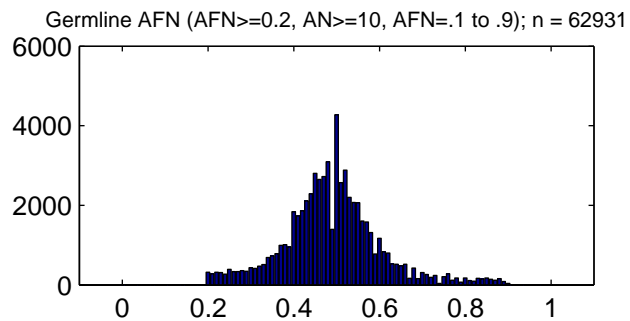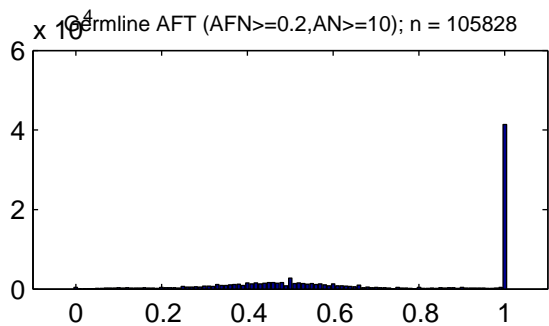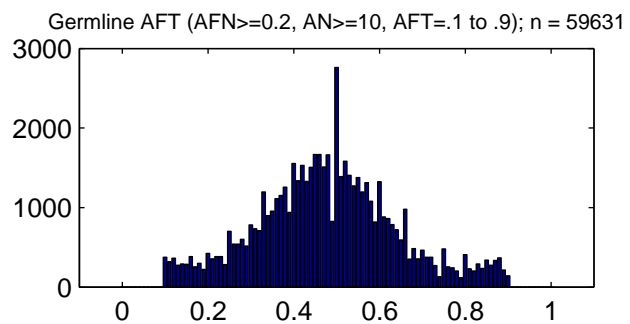

273\_ucsc.edu\_BRCA.IlluminaGA\_DNASeq.Level\_2.2.0.0 -- TCGA-A2-A04R\_D

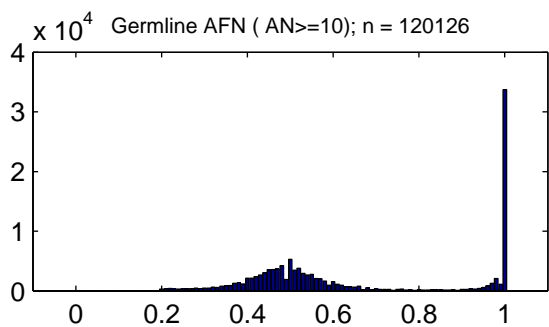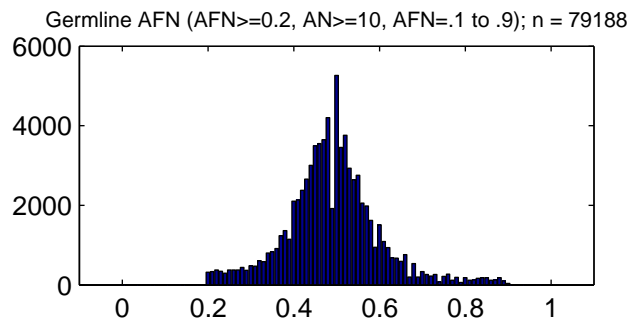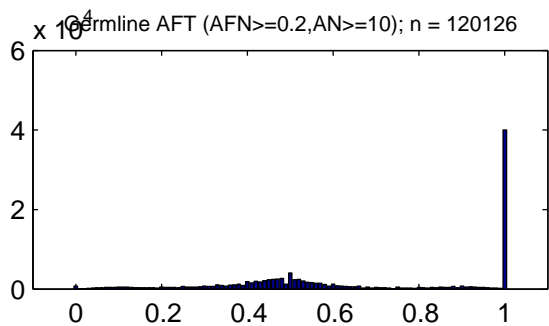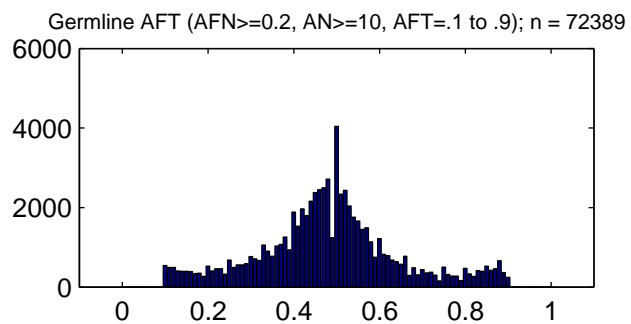

274\_ucsc.edu\_BRCA.IlluminaGA\_DNASeq.Level\_2.13.0.0 -- TCGA-E2-A15T\_D

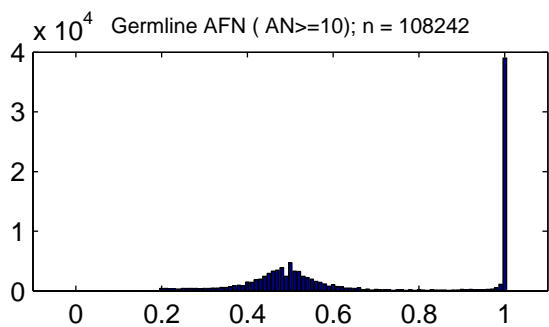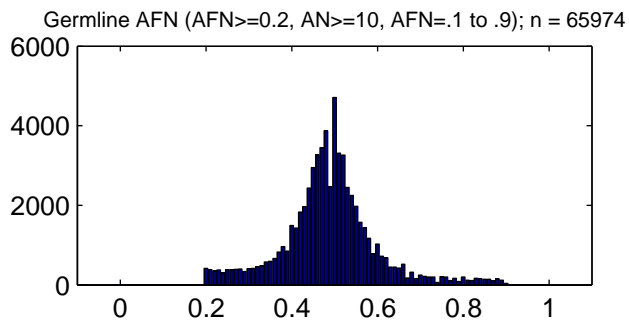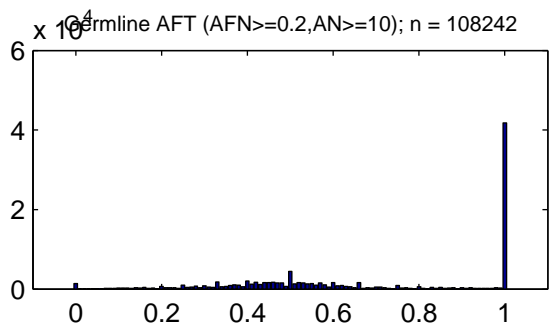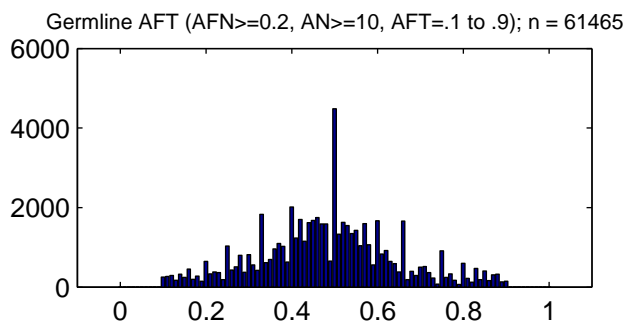

275\_ucsc.edu\_BRCA.IlluminaGA\_DNASeq.Level\_2.13.0.0 -- TCGA-E2-A107\_D

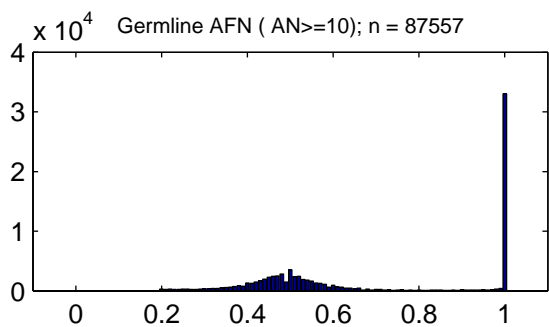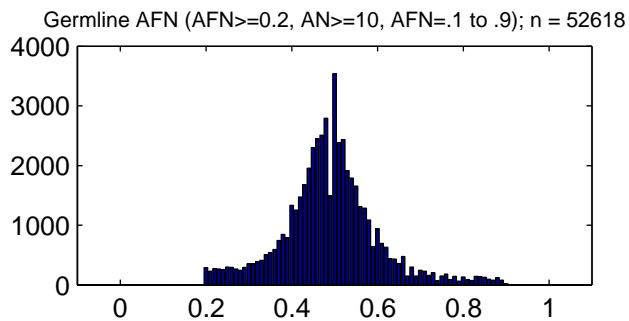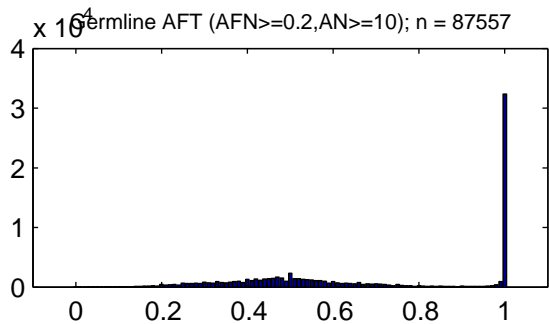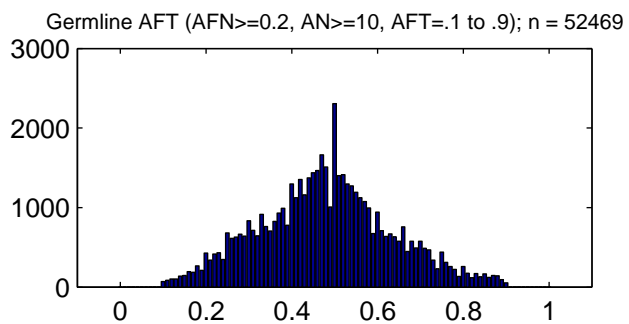

276\_ucsc.edu\_BRCA.IlluminaGA\_DNASeq.Level\_2.9.0.0 -- TCGA-B6-A0RO\_D

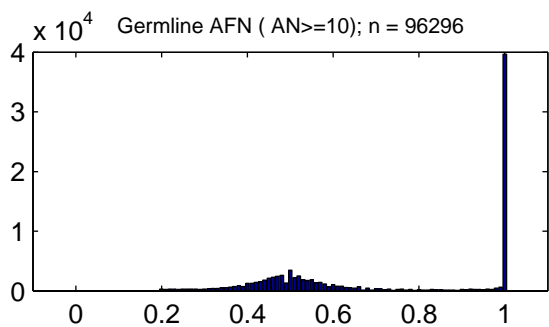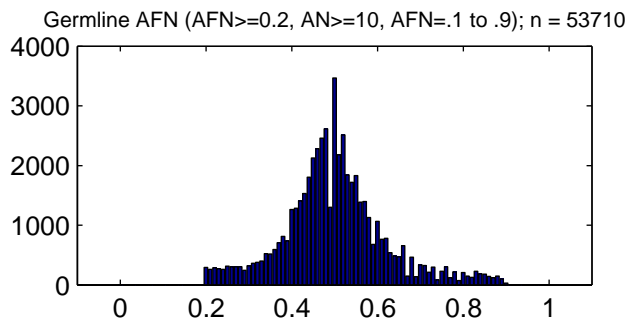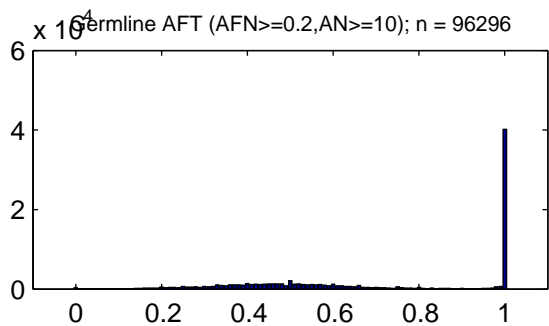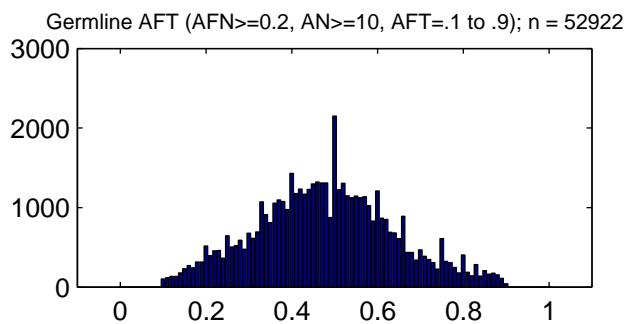

277\_ucsc.edu\_BRCA.IlluminaGA\_DNASeq.Level\_2.4.0.0 -- TCGA-A8-A09D\_W

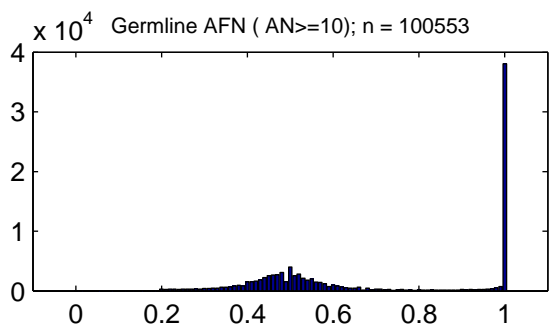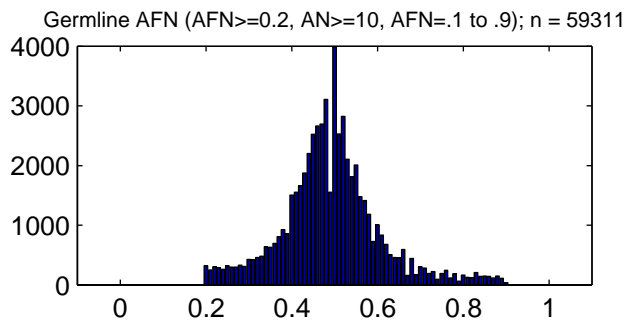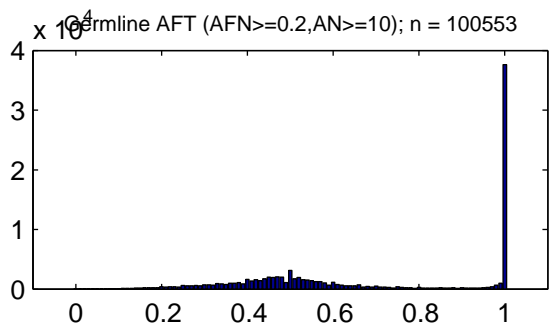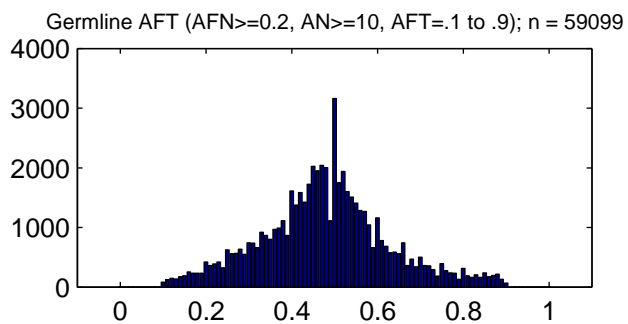

278\_ucsc.edu\_BRCA.IlluminaGA\_DNASeq.Level\_2.4.0.0 -- TCGA-A8-A09T\_W

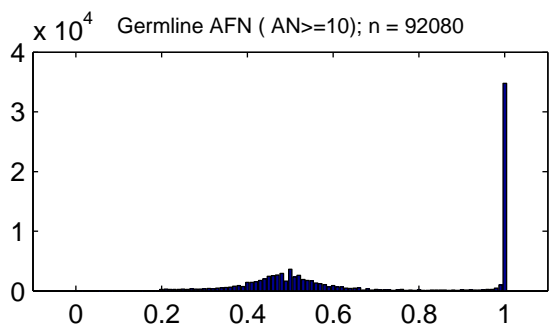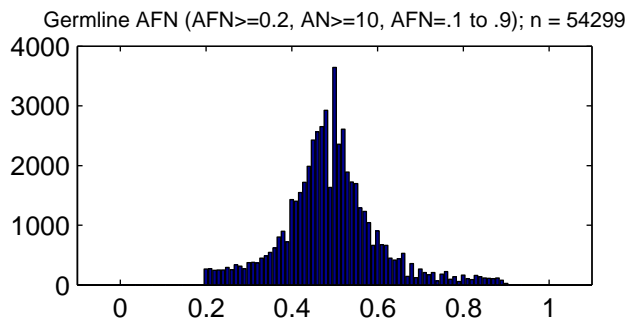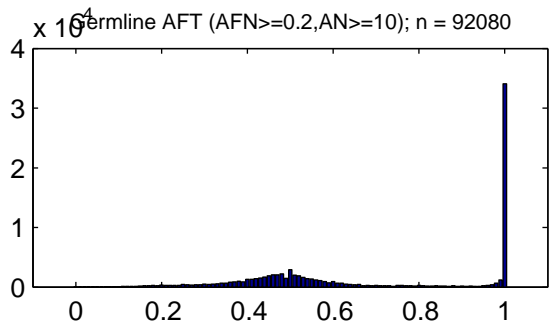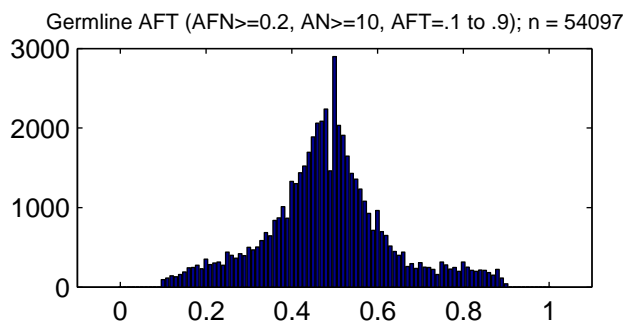

279\_ucsc.edu\_BRCA.IlluminaGA\_DNASeq.Level\_2.4.0.0 -- TCGA-A8-A082\_W

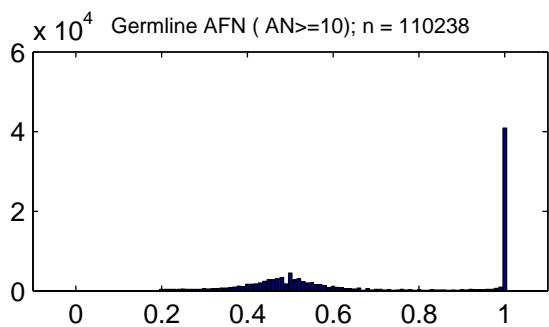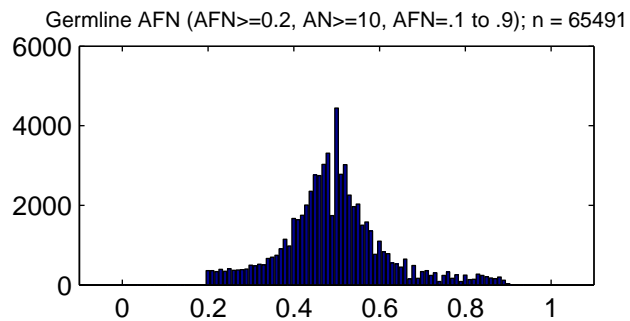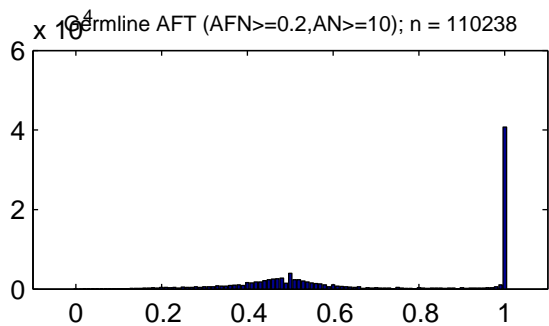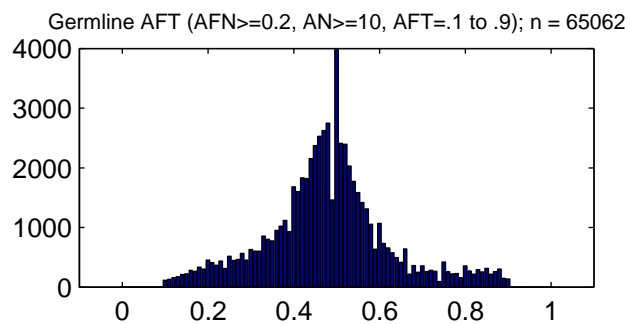



280\_ucsc.edu\_BRCA.IlluminaGA\_DNASeq.Level\_2.10.0.0 -- TCGA-BH-A0HK\_V

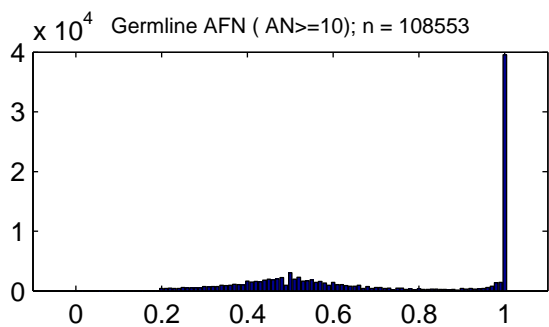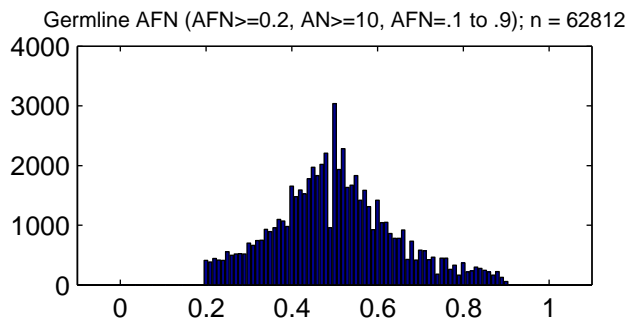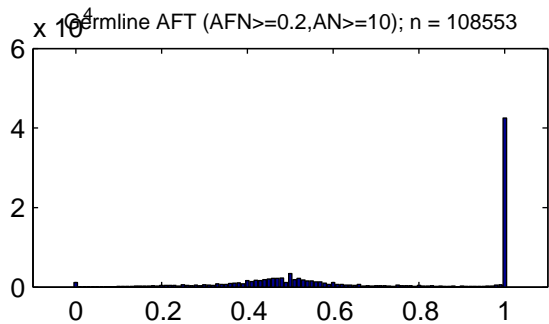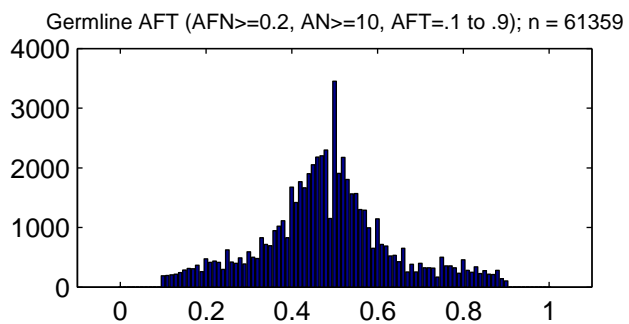

281\_ucsc.edu\_BRCA.IlluminaGA\_DNASeq.Level\_2.6.0.0 -- TCGA-AO-A12B\_D

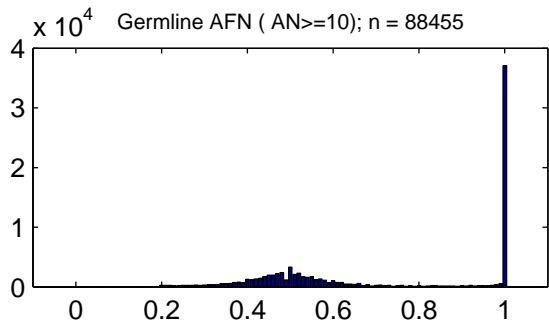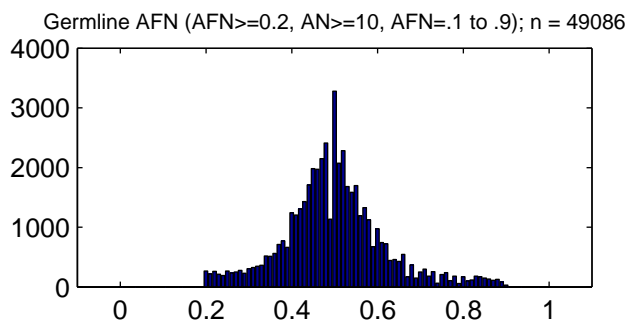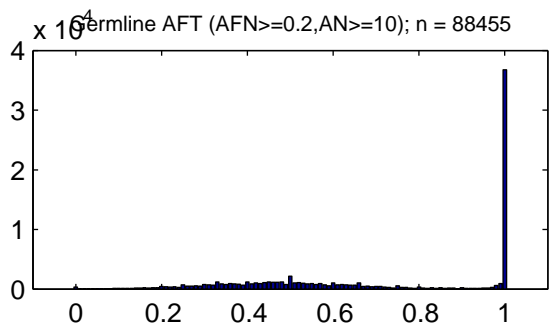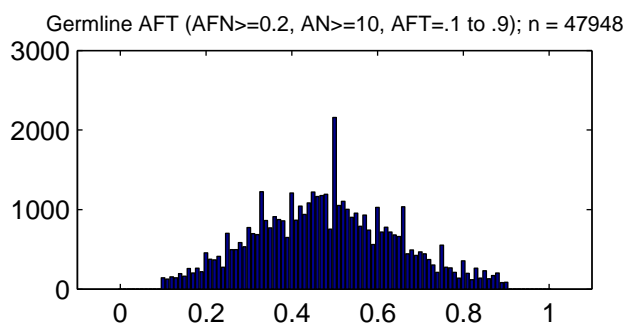

282\_ucsc.edu\_BRCA.IlluminaGA\_DNASeq.Level\_2.10.0.0 -- TCGA-BH-A1EO\_I

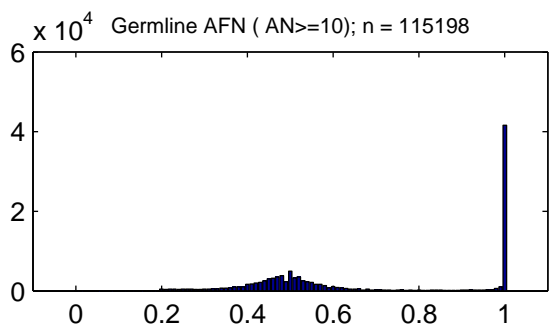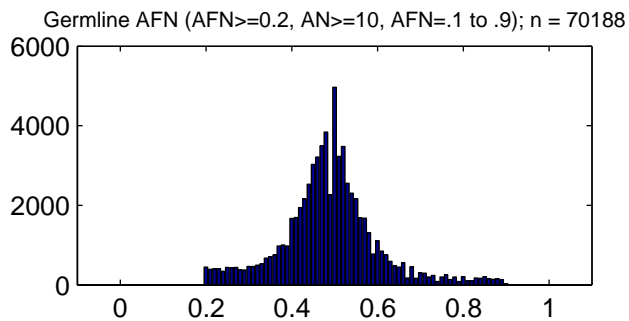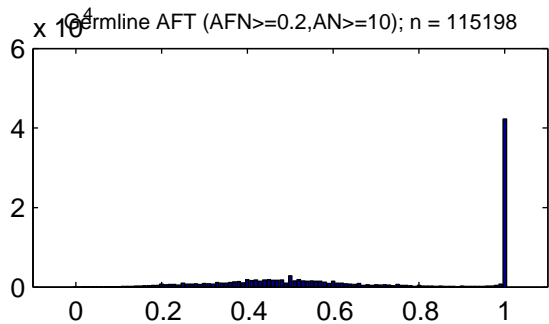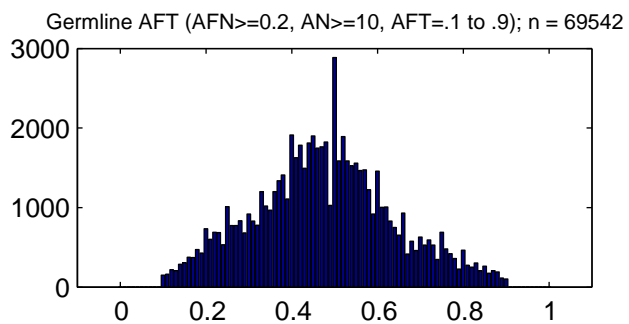

283\_ucsc.edu\_BRCA.IlluminaGA\_DNASeq.Level\_2.5.0.0 -- TCGA-AN-A03X\_W

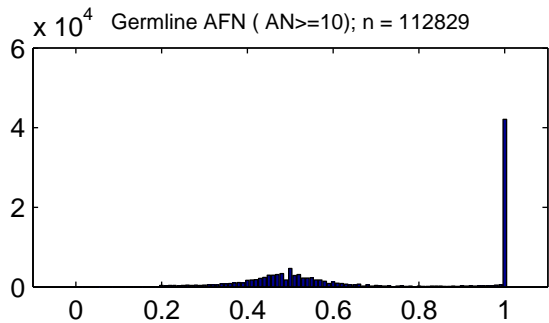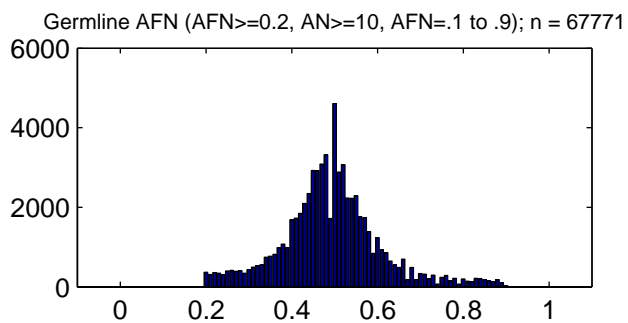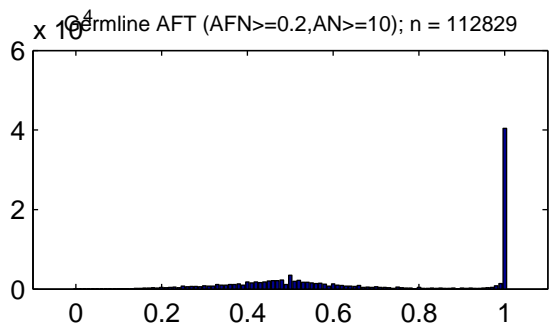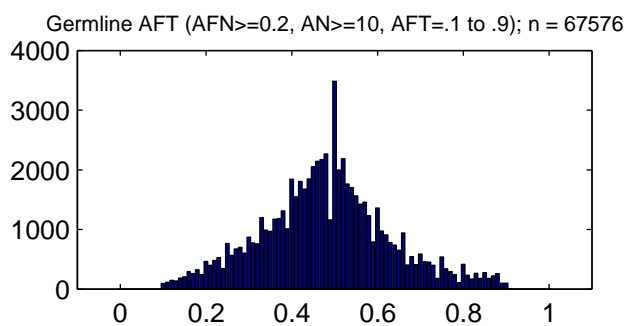

284\_ucsc.edu\_BRCA.IlluminaGA\_DNASeq.Level\_2.10.0.0 -- TCGA-BH-A0C7\_C

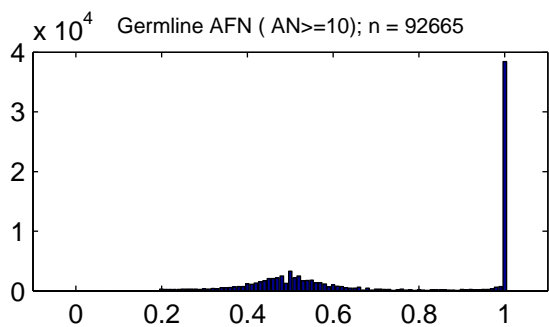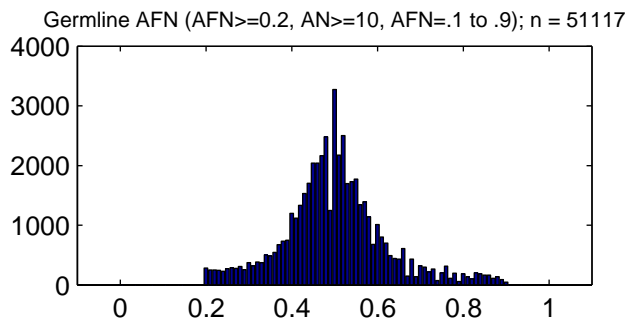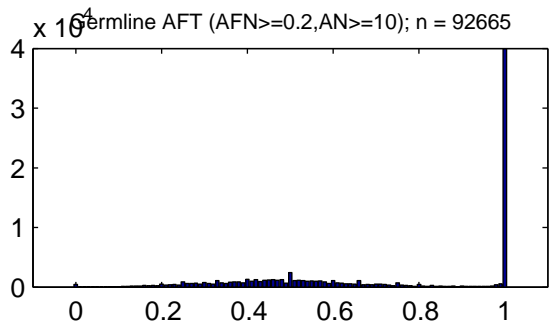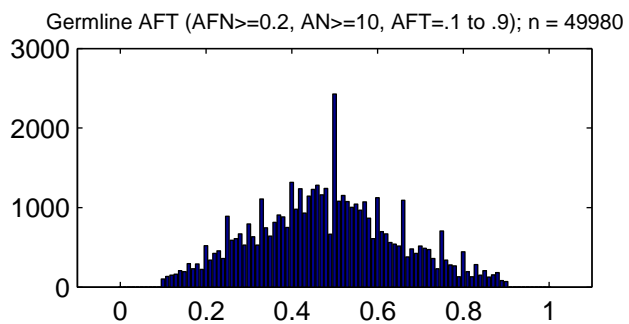

285\_ucsc.edu\_BRCA.IlluminaGA\_DNASeq.Level\_2.10.0.0 -- TCGA-BH-A0B4\_V

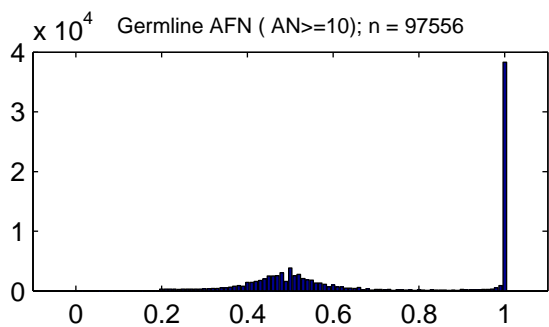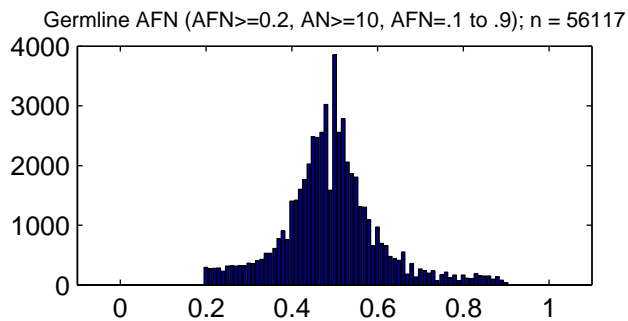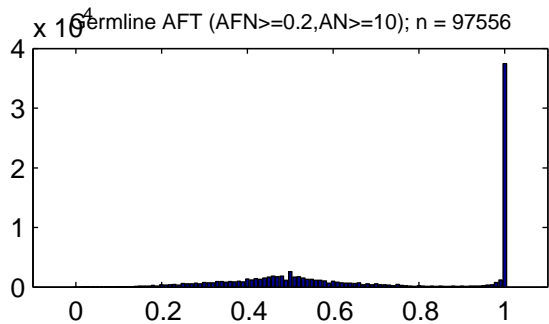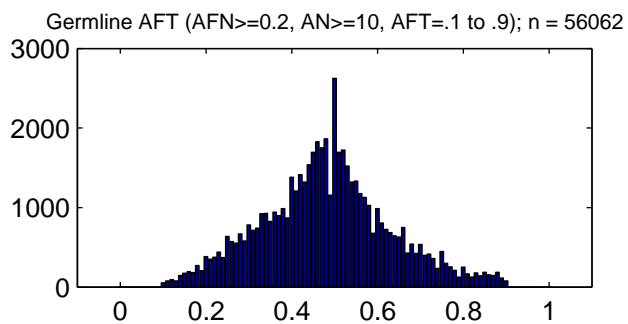

286\_ucsc.edu\_BRCA.IlluminaGA\_DNASeq.Level\_2.10.0.0 -- TCGA-BH-A0DL\_C

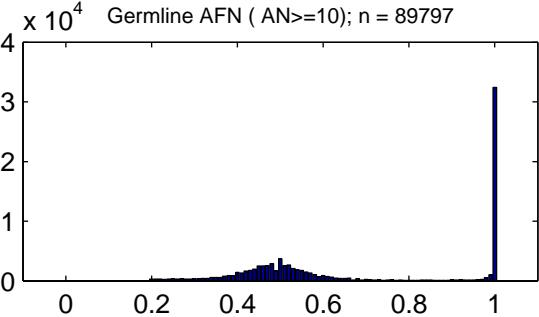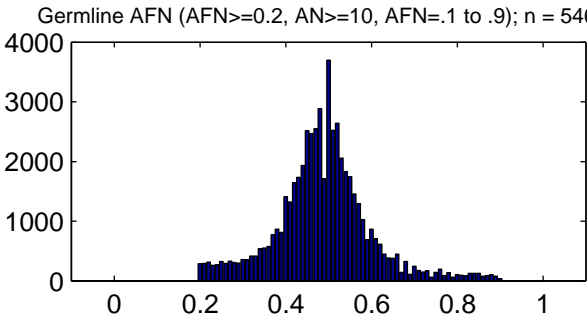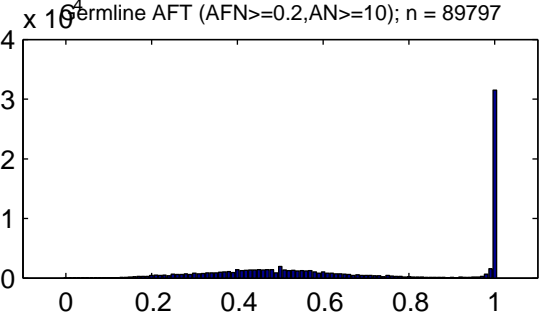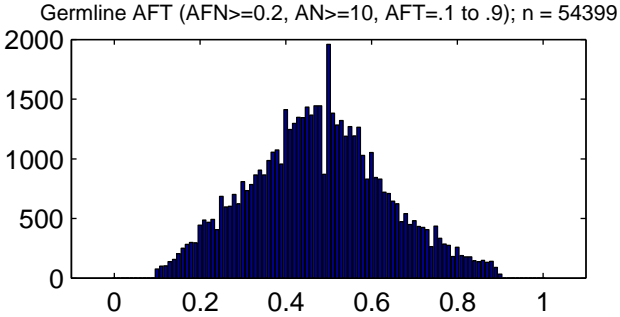

287\_ucsc.edu\_BRCA.IlluminaGA\_DNASeq.Level\_2.4.0.0 -- TCGA-A8-A083\_W

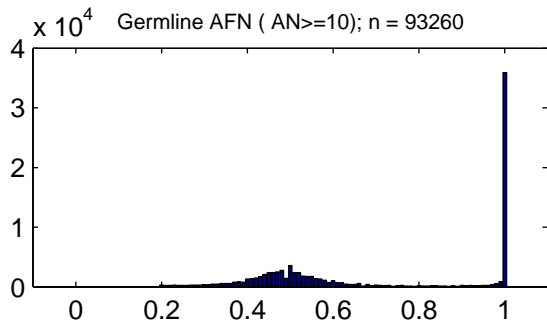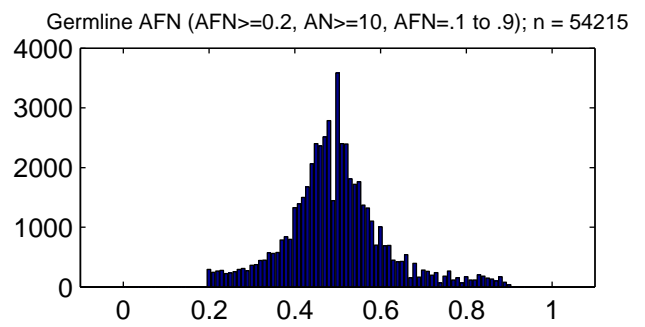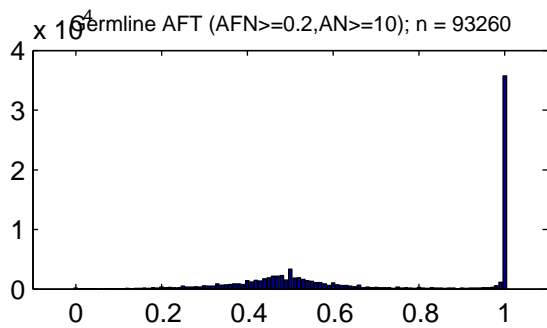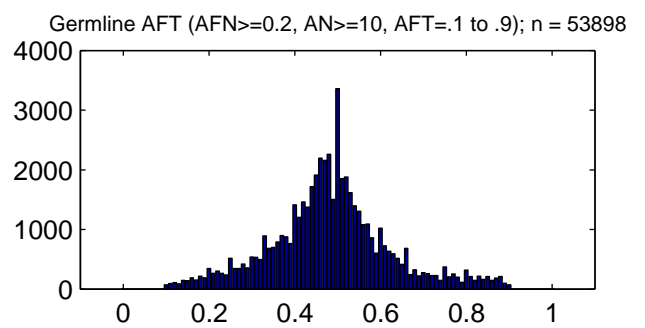



288\_ucsc.edu\_BRCA.IlluminaGA\_DNASeq.Level\_2.4.0.0 -- TCGA-A8-A0AD\_W

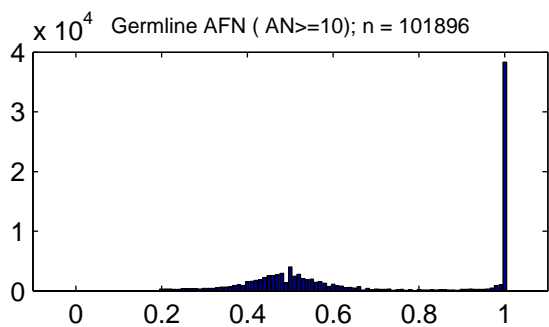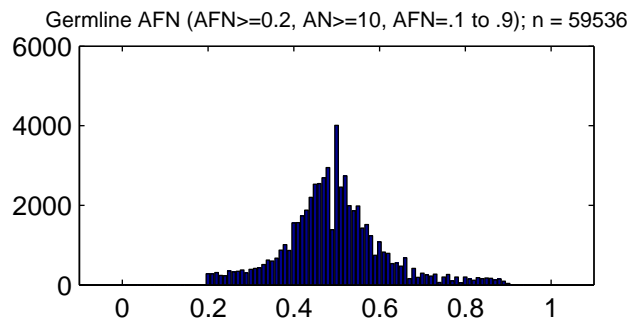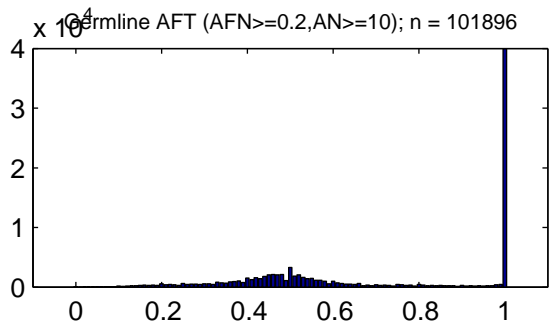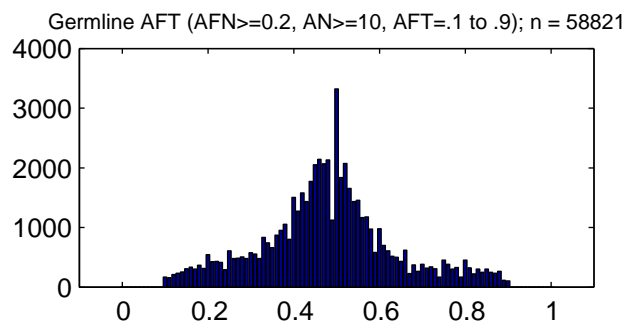

289\_ucsc.edu\_BRCA.IlluminaGA\_DNASeq.Level\_2.4.0.0 -- TCGA-A8-A095\_W

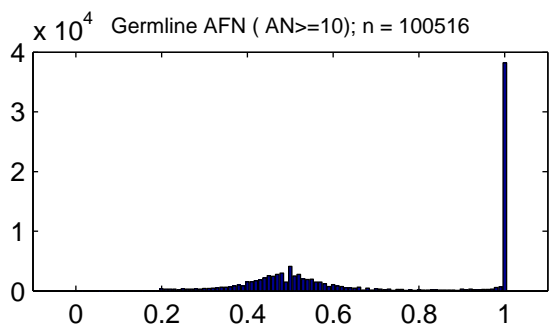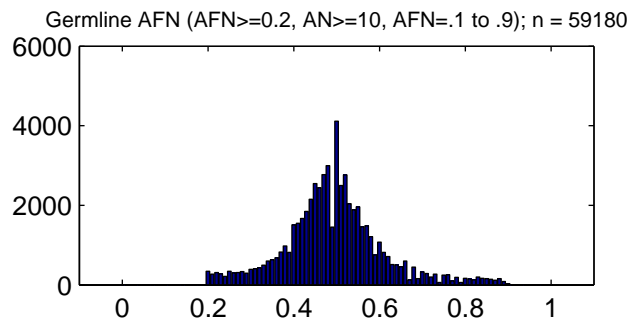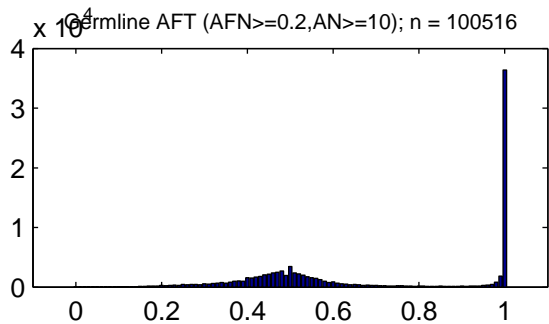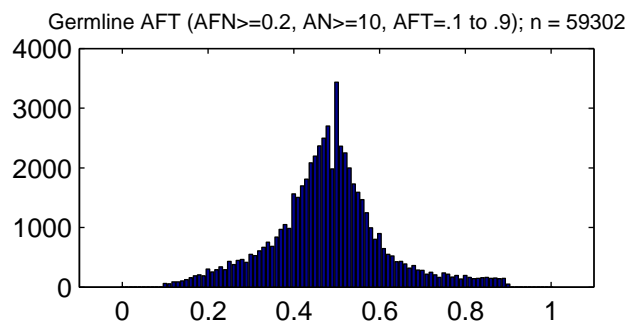

290\_ucsc.edu\_BRCA.IlluminaGA\_DNASeq.Level\_2.3.0.0 -- TCGA-A7-A0D9\_W

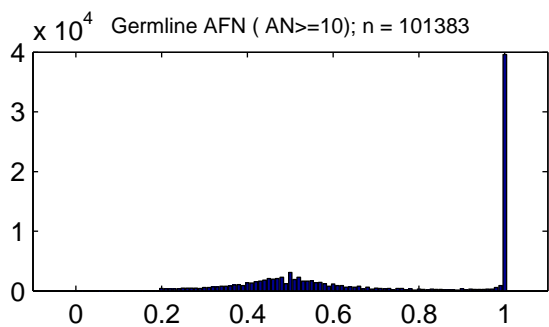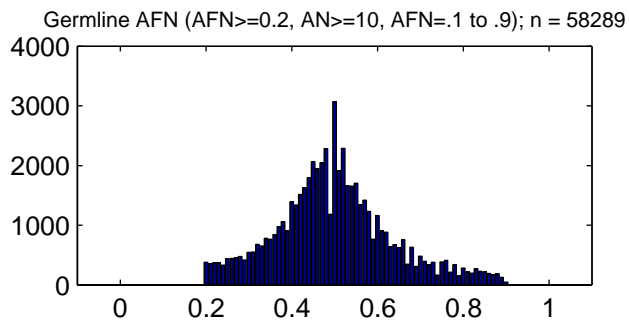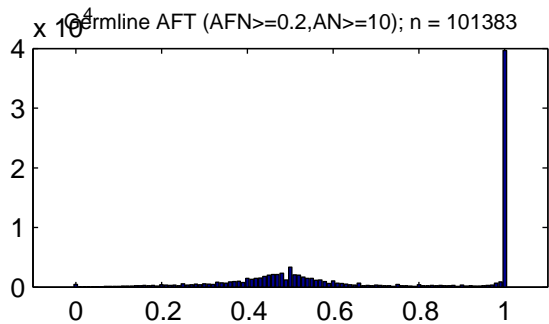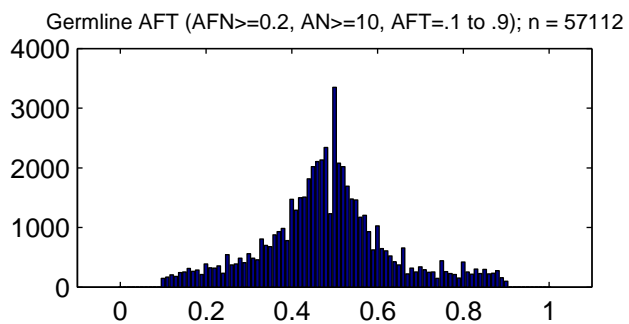

291\_ucsc.edu\_BRCA.IlluminaGA\_DNASeq.Level\_2.5.0.0 --- TCGA-AN-A0XW\_D

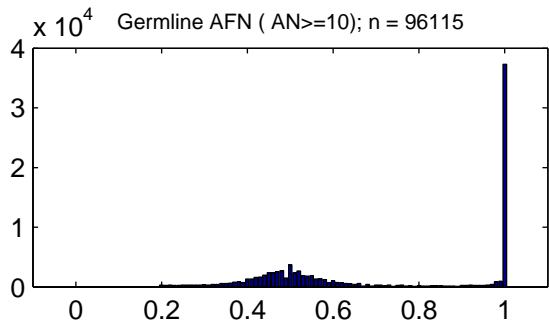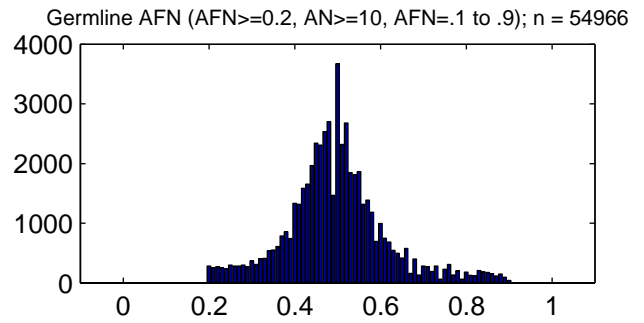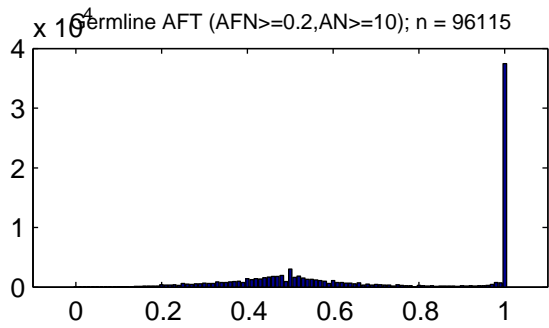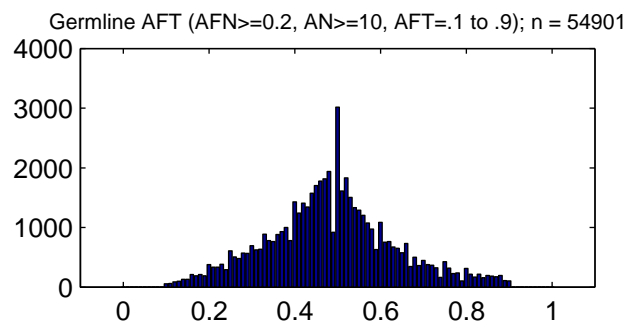

292\_ucsc.edu\_BRCA.IlluminaGA\_DNASeq.Level\_2.10.0.0 -- TCGA-BH-A0E2\_V

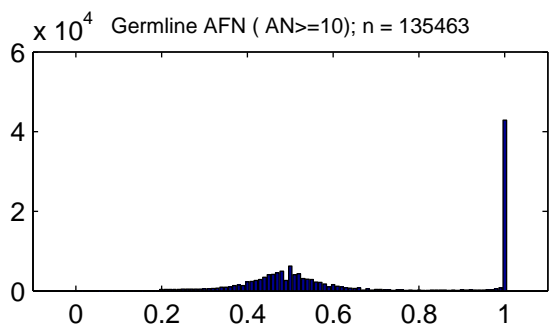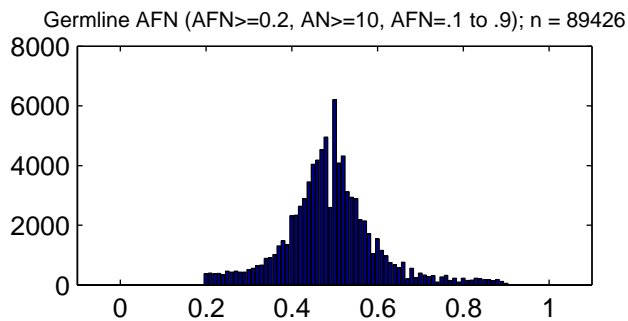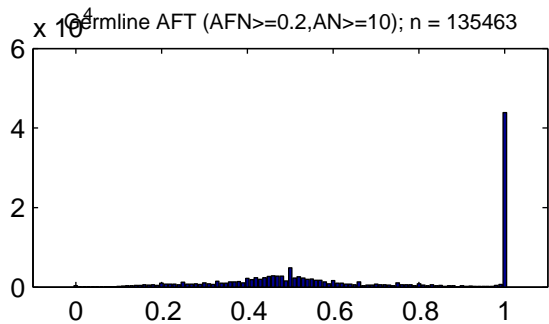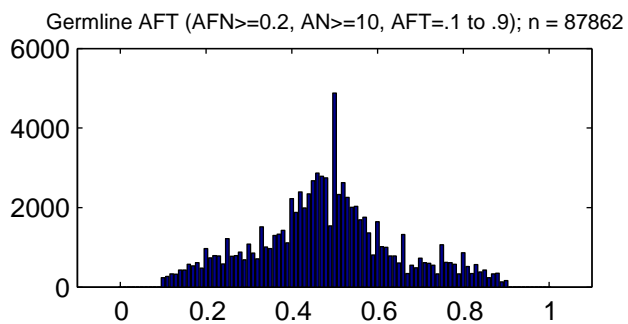

293\_ucsc.edu\_BRCA.IlluminaGA\_DNASeq.Level\_2.9.0.0 -- TCGA-B6-A0RL\_D

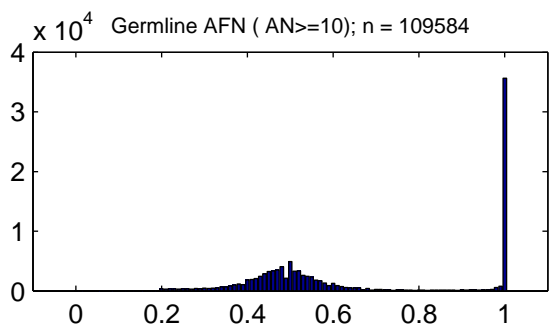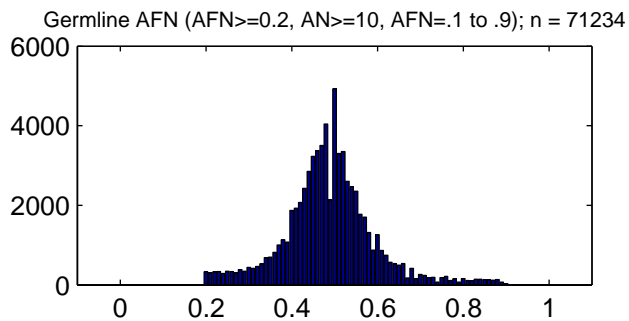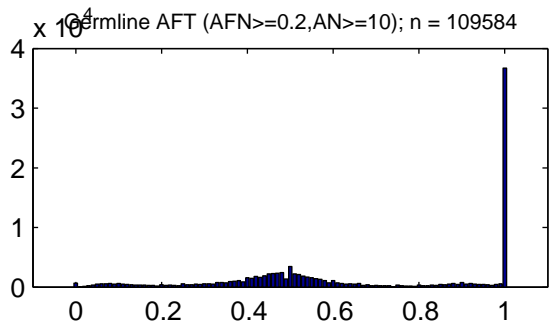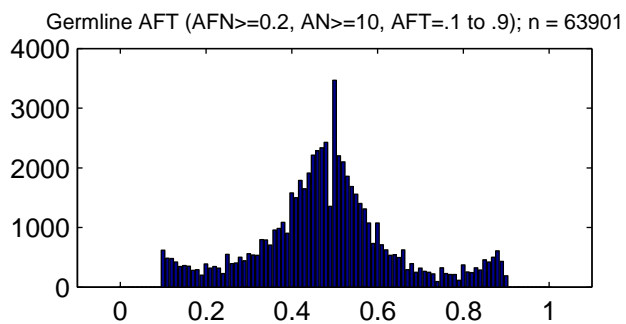

294\_ucsc.edu\_BRCA.IlluminaGA\_DNASeq.Level\_2.4.0.0 -- TCGA-A8-A07O\_W

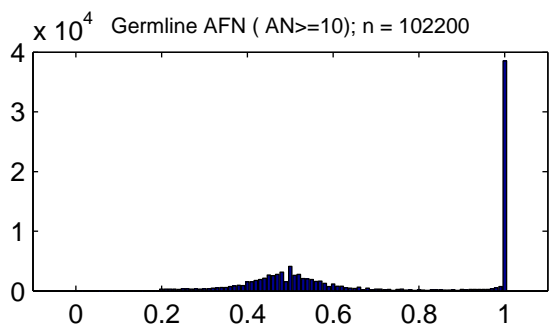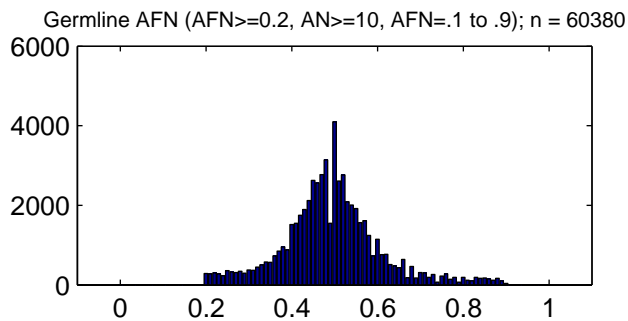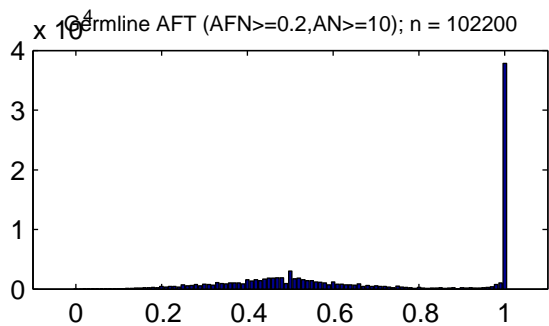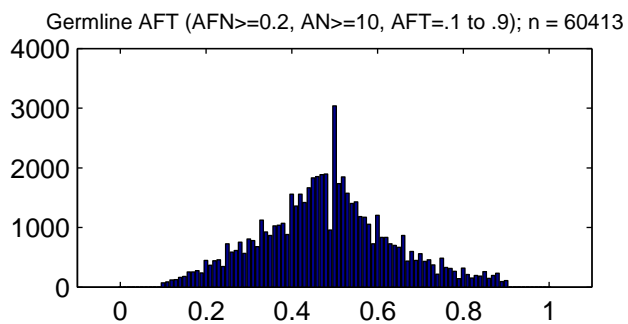

295\_ucsc.edu\_BRCA.IlluminaGA\_DNASeq.Level\_2.11.0.0 -- TCGA-C8-A12Y\_C

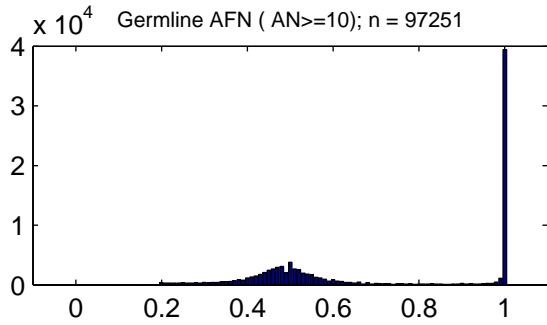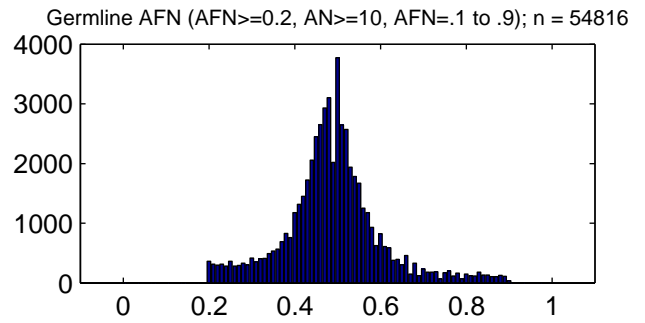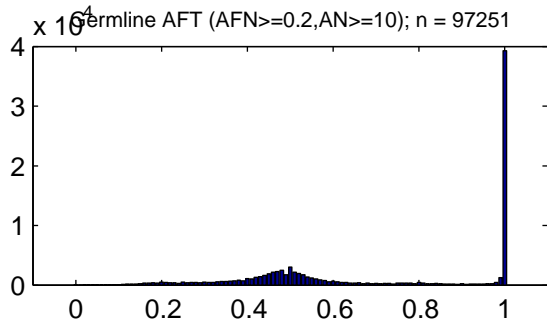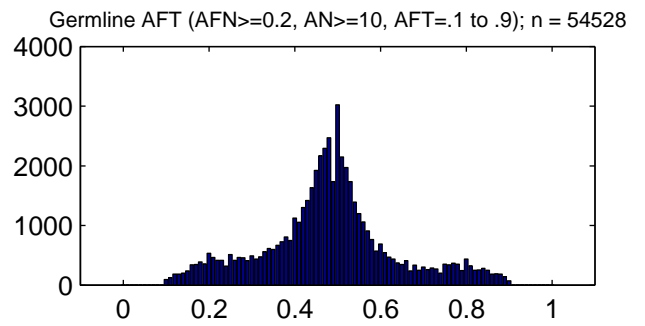



296\_ucsc.edu\_BRCA.IlluminaGA\_DNASeq.Level\_2.10.0.0 -- TCGA-BH-A18S\_C

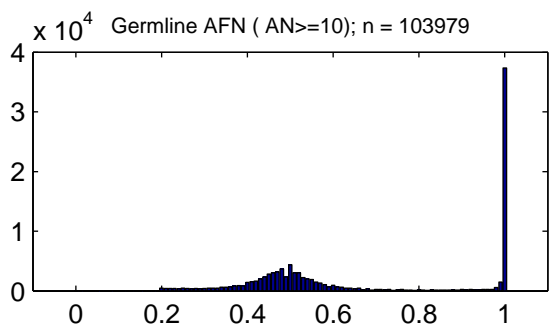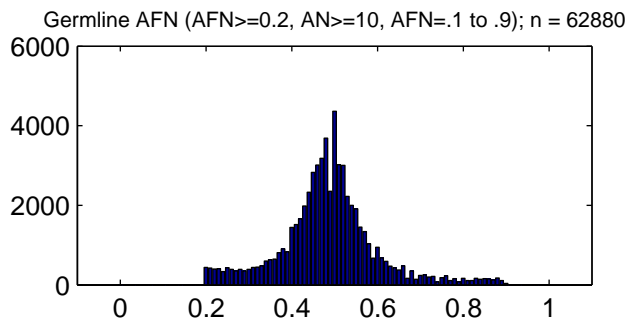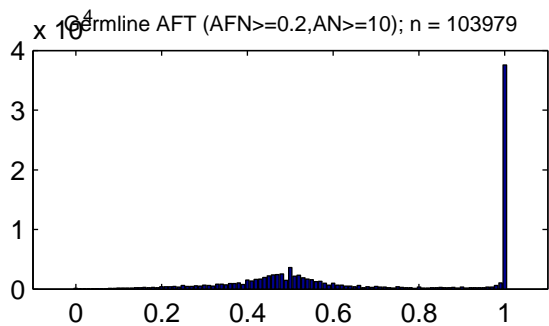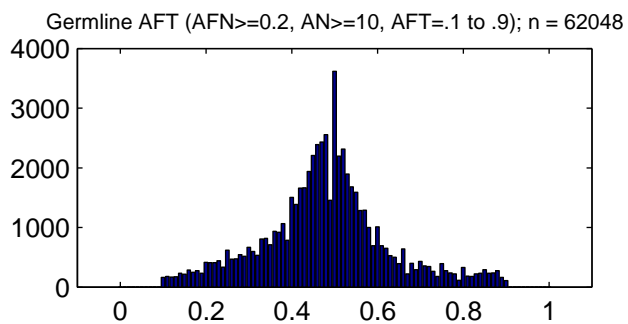

297\_ucsc.edu\_BRCA.IlluminaGA\_DNASeq.Level\_2.2.0.0 -- TCGA-A2-A04V\_W

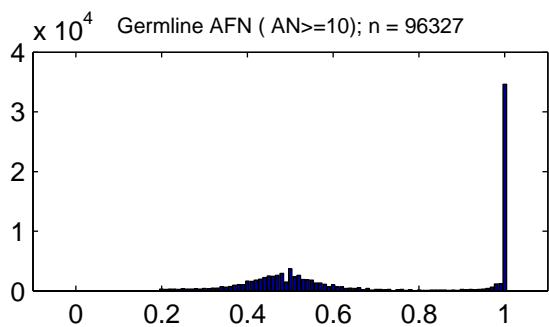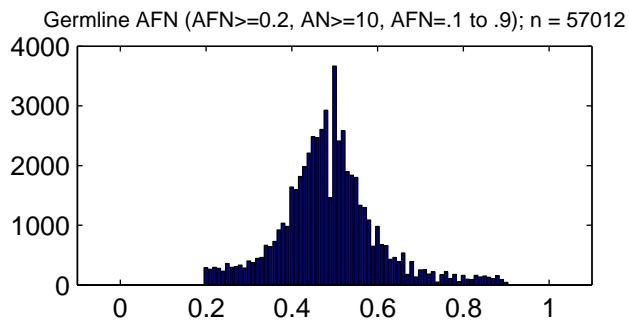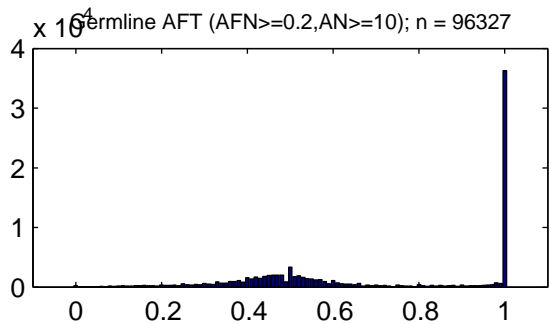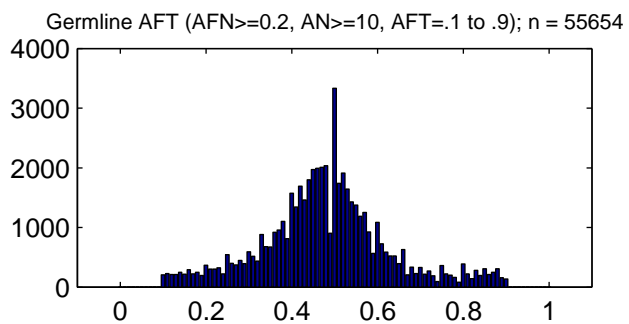

298\_ucsc.edu\_BRCA.IlluminaGA\_DNASeq.Level\_2.4.0.0 -- TCGA-A8-A0A4\_W

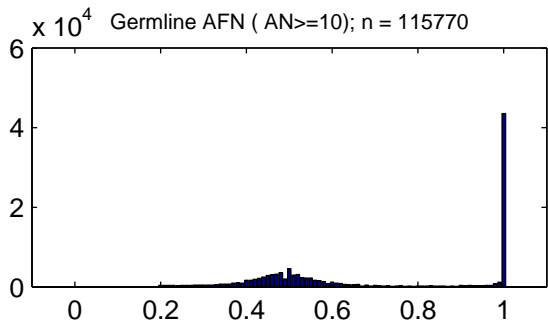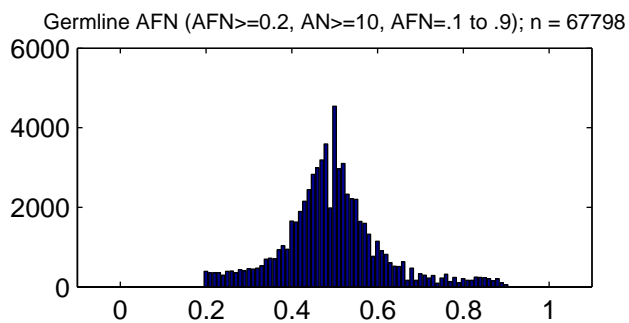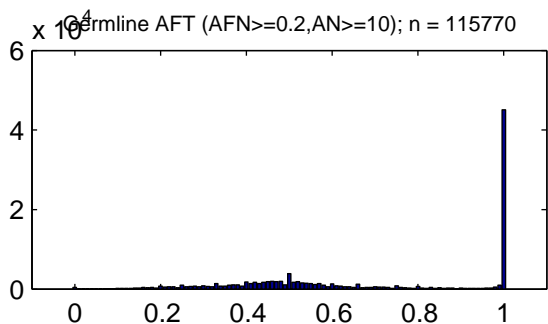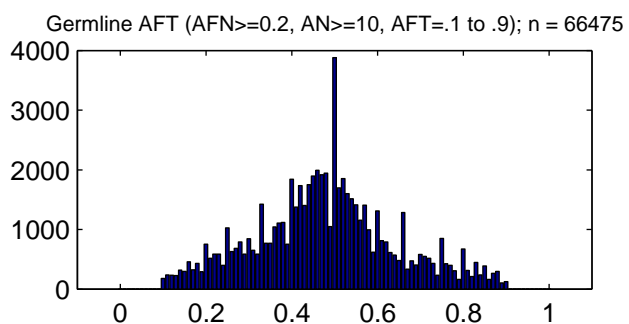

299\_ucsc.edu\_BRCA.IlluminaGA\_DNASeq.Level\_2.9.0.0 -- TCGA-B6-A0IN\_W

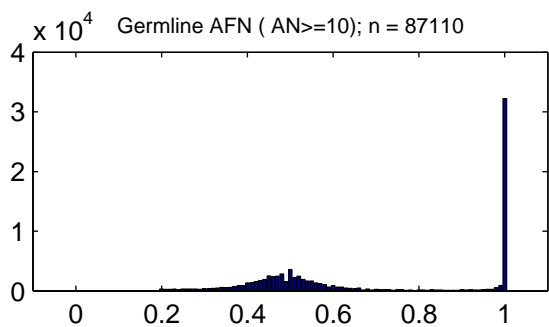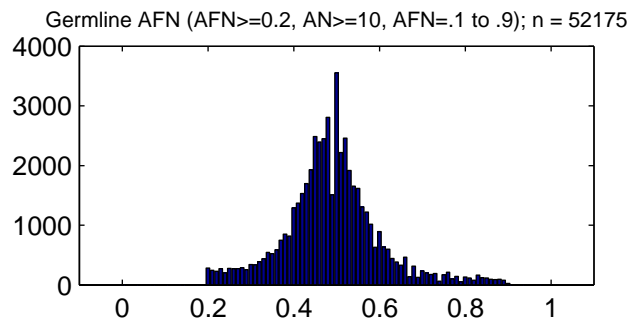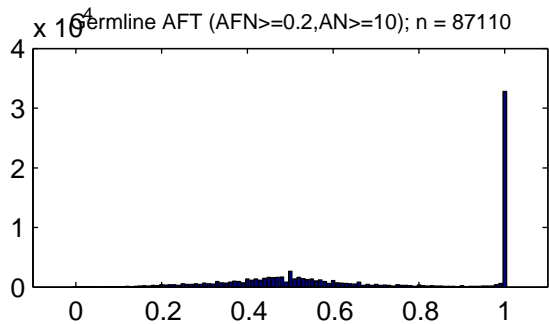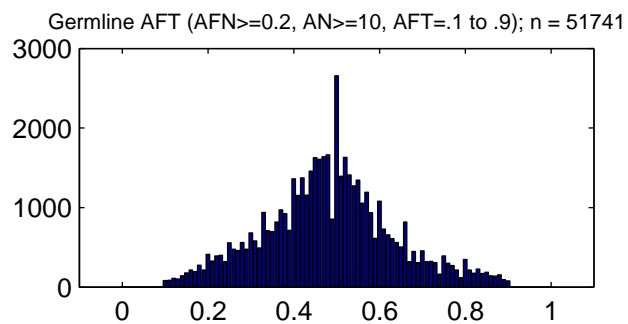

300\_ucsc.edu\_BRCA.IlluminaGA\_DNASeq.Level\_2.5.0.0 -- TCGA-AN-A0XV\_D

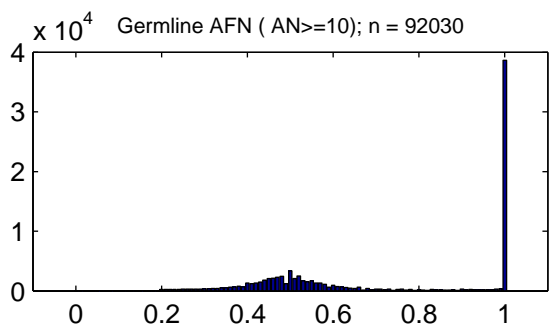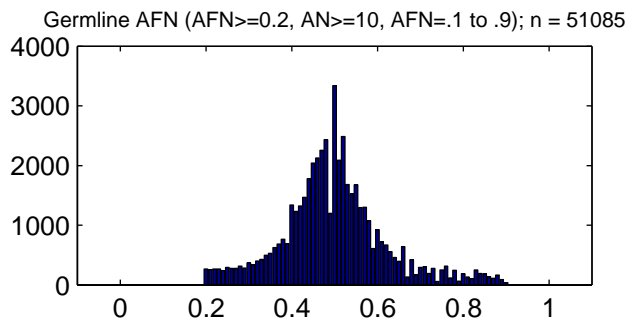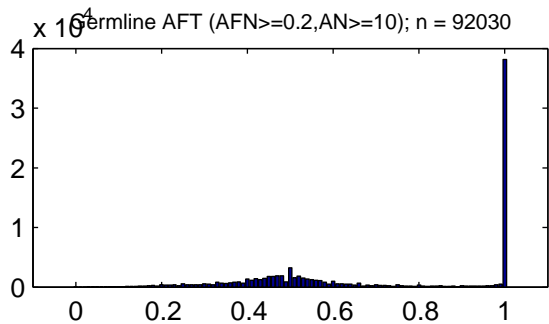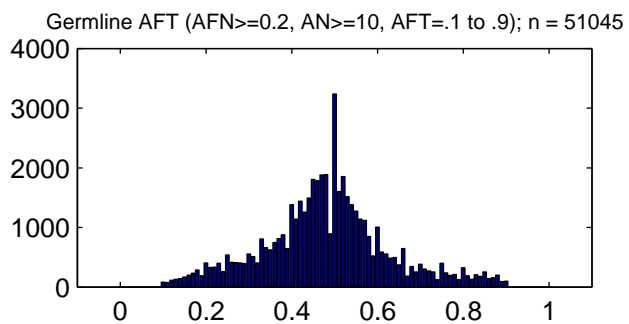

301\_ucsc.edu\_BRCA.IlluminaGA\_DNASeq.Level\_2.4.0.0 -- TCGA-A8-A09G\_W

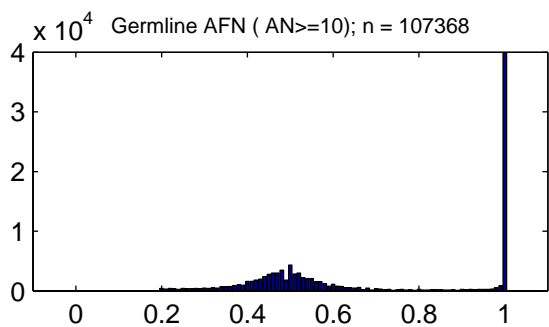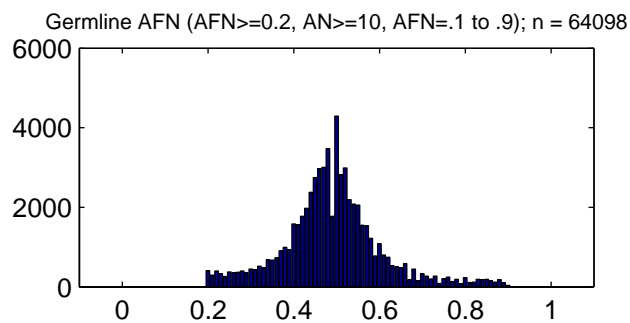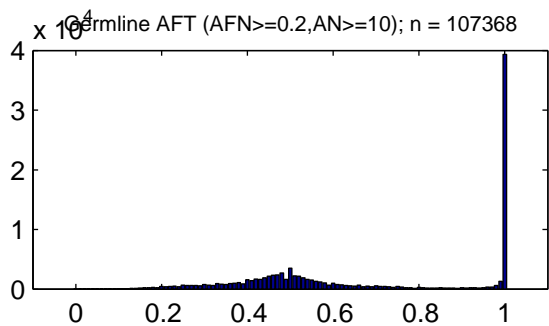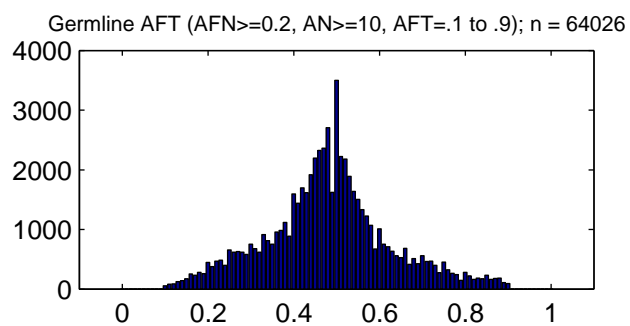

302\_ucsc.edu\_BRCA.IlluminaGA\_DNASeq.Level\_2.14.0.0 -- TCGA-BH-A0BR\_V

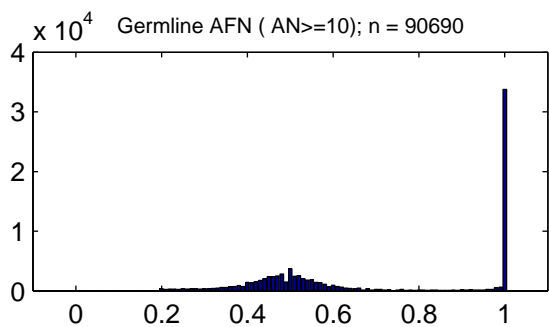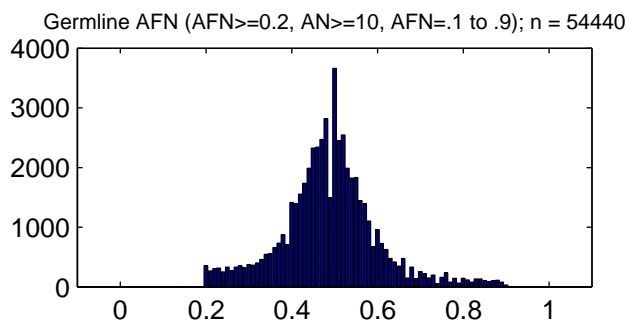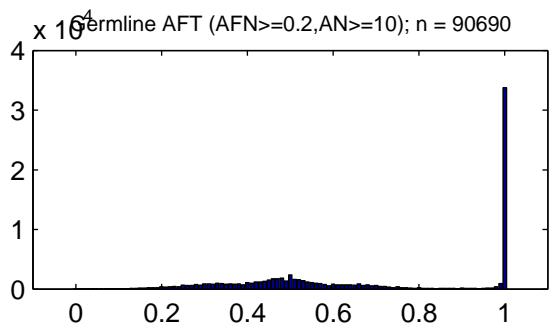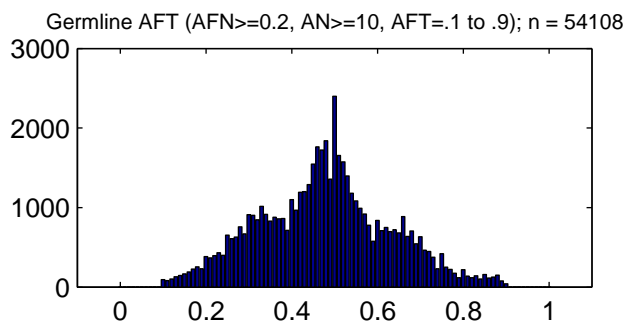

303\_ucsc.edu\_BRCA.IlluminaGA\_DNASeq.Level\_2.10.0.0 -- TCGA-BH-A0BV\_V

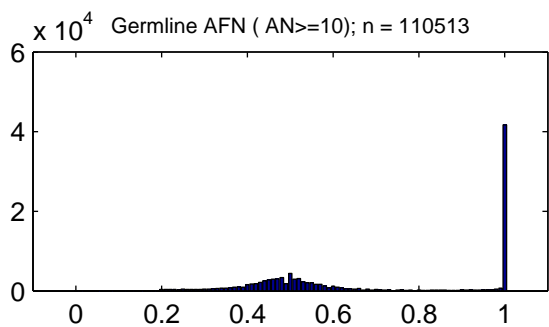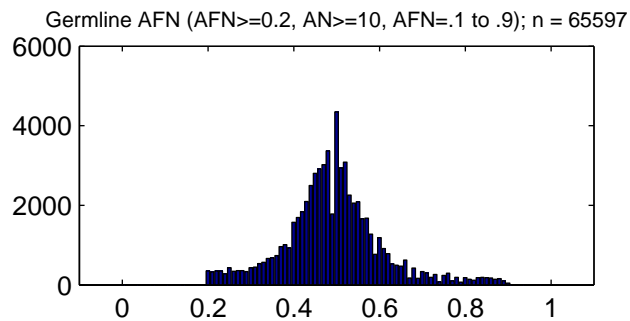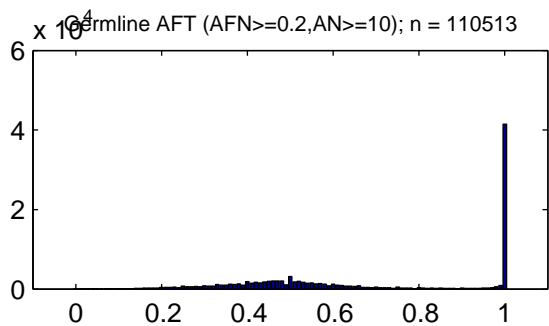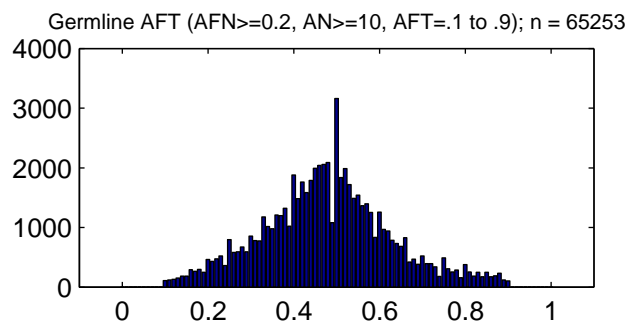



304\_ucsc.edu\_BRCA.IlluminaGA\_DNASeq.Level\_2.5.0.0 -- TCGA-AN-A0XL\_D

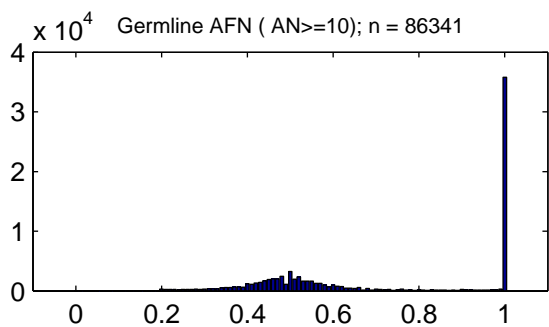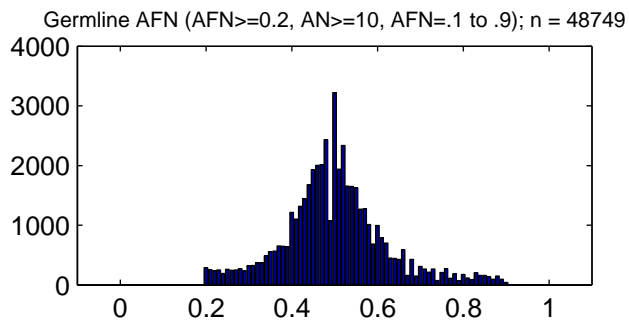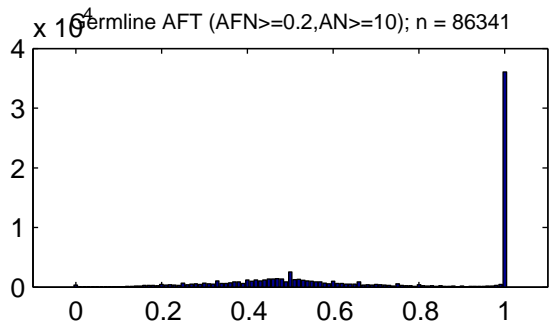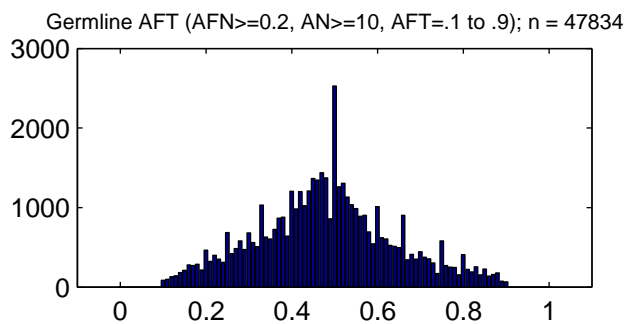

305\_ucsc.edu\_BRCA.IlluminaGA\_DNASeq.Level\_2.6.0.0 -- TCGA-AO-A03M\_D

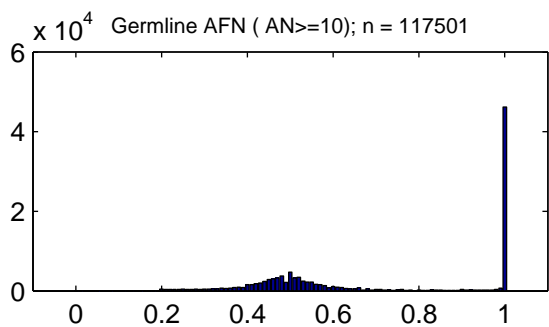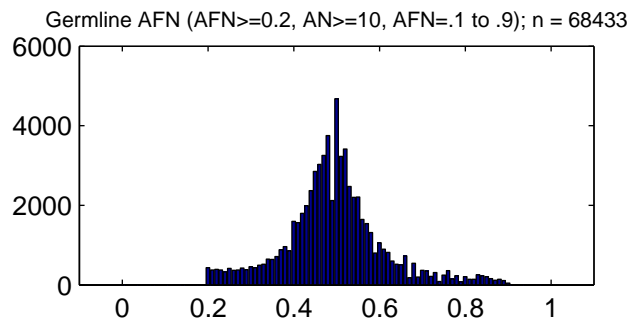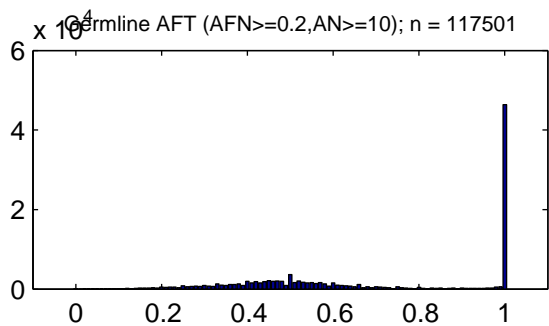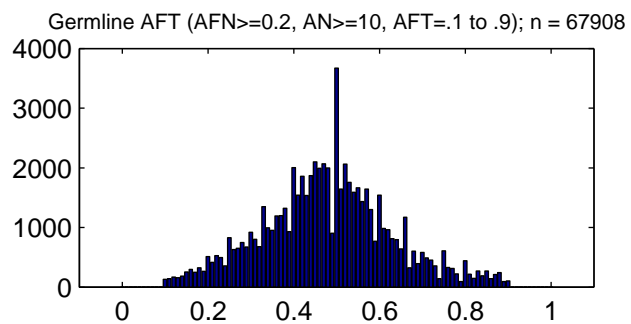

306\_ucsc.edu\_BRCA.IlluminaGA\_DNASeq.Level\_2.4.0.0 -- TCGA-A8-A07J\_W

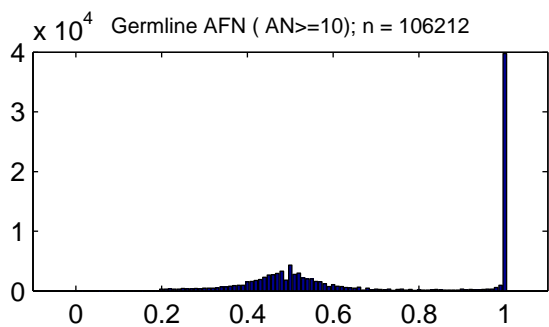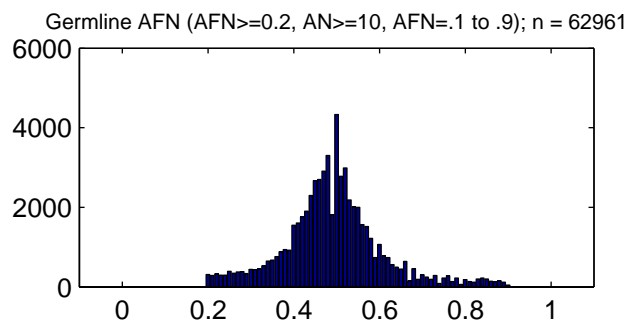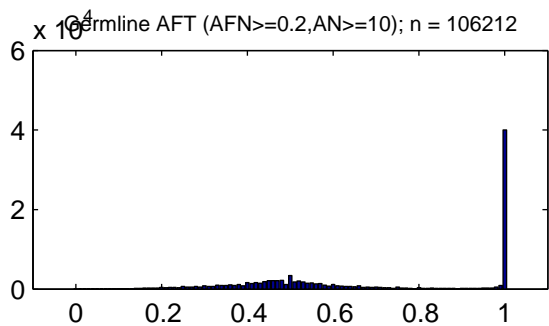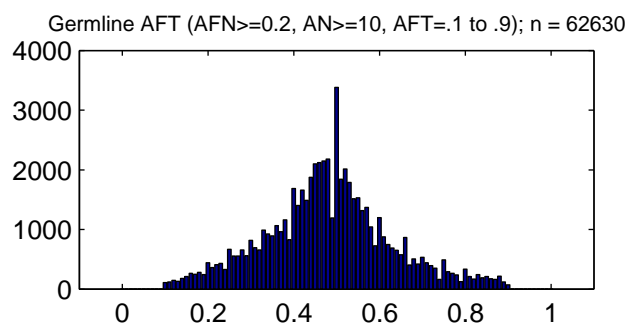

307\_ucsc.edu\_BRCA.IlluminaGA\_DNASeq.Level\_2.6.0.0 -- TCGA-AO-A0JA\_W

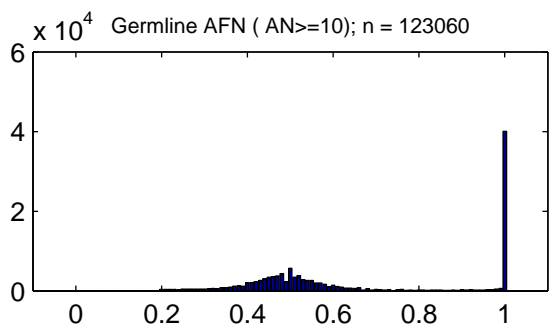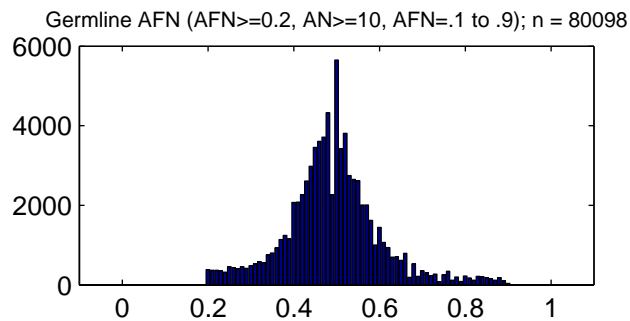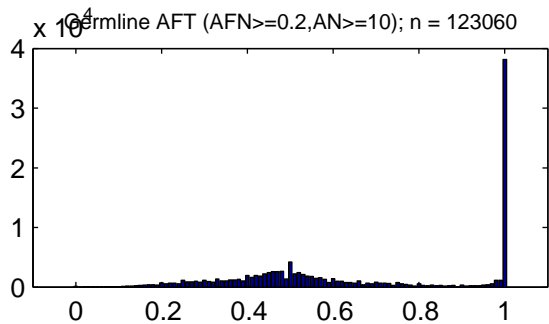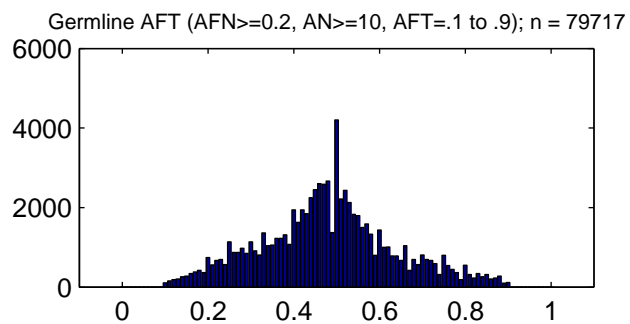

308\_ucsc.edu\_BRCA.IlluminaGA\_DNASeq.Level\_2.11.0.0 -- TCGA-C8-A12O\_C

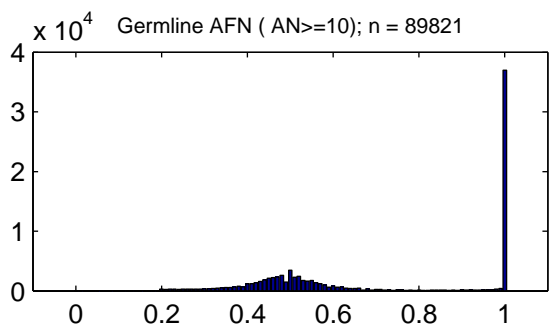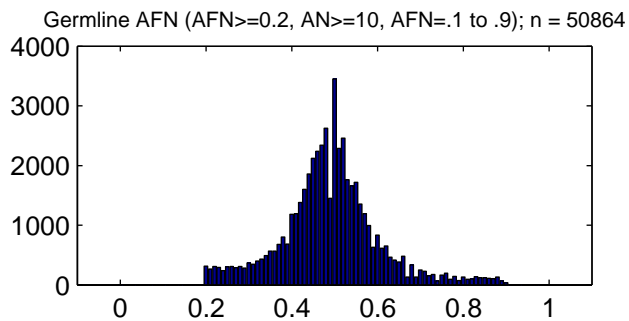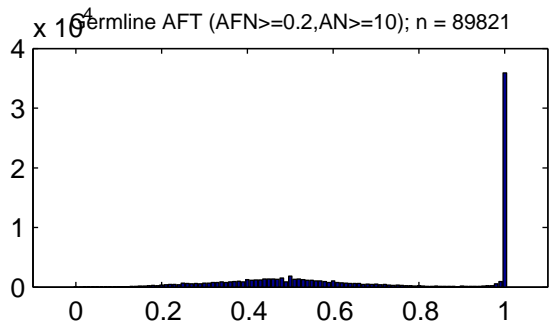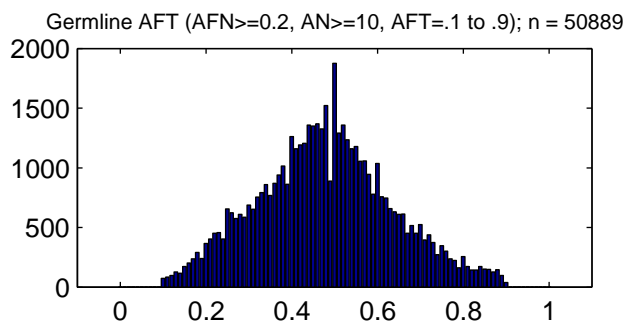

309\_ucsc.edu\_BRCA.IlluminaGA\_DNASeq.Level\_2.4.0.0 -- TCGA-A8-A07F\_W

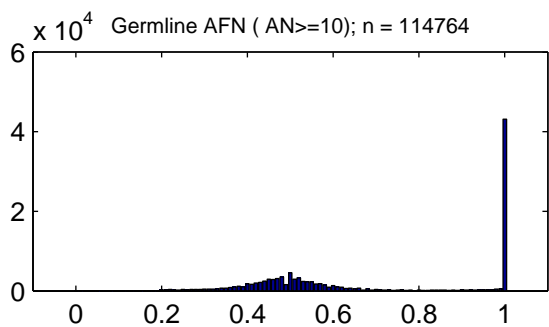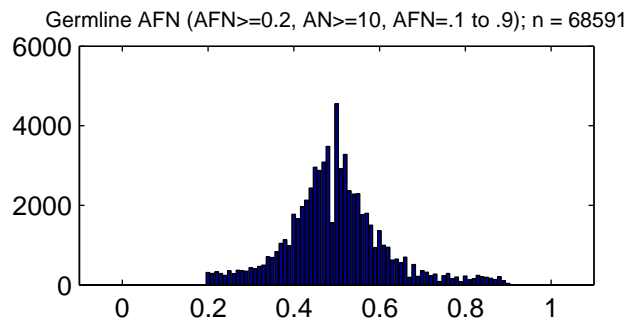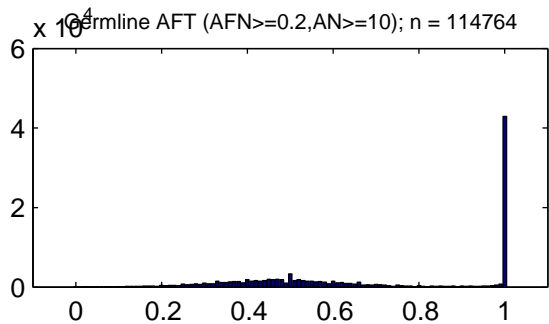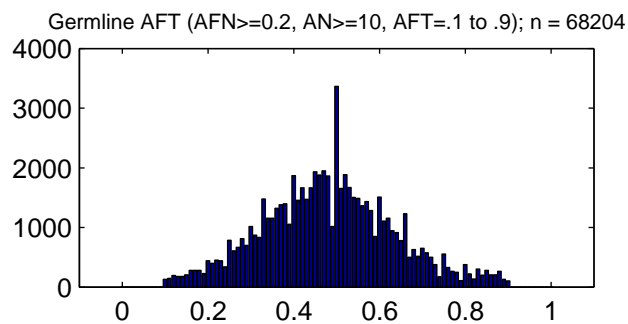

310\_ucsc.edu\_BRCA.IlluminaGA\_DNASeq.Level\_2.8.0.0 -- TCGA-AR-A0TT\_D

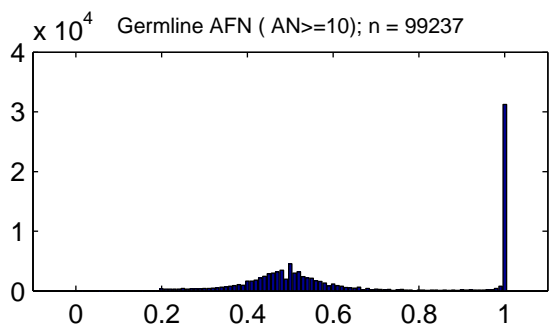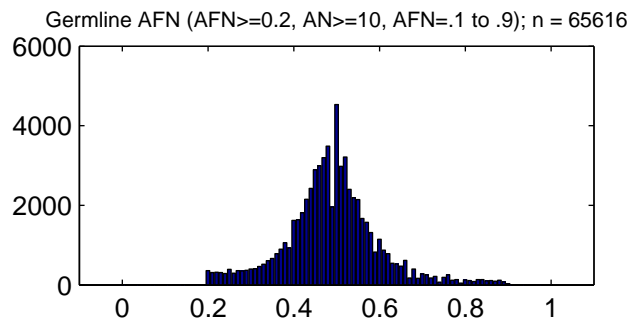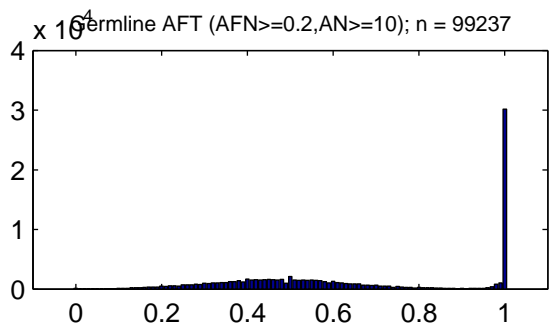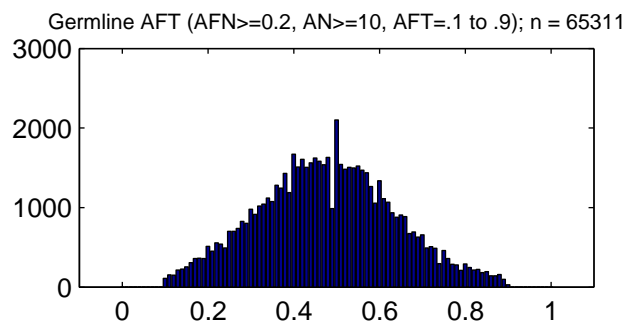

311\_ucsc.edu\_BRCA.IlluminaGA\_DNASeq.Level\_2.10.0.0 -- TCGA-BH-A0DZ\_V

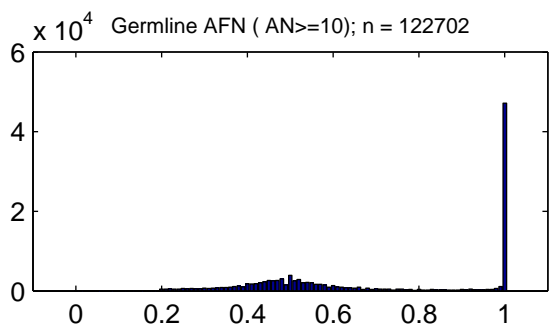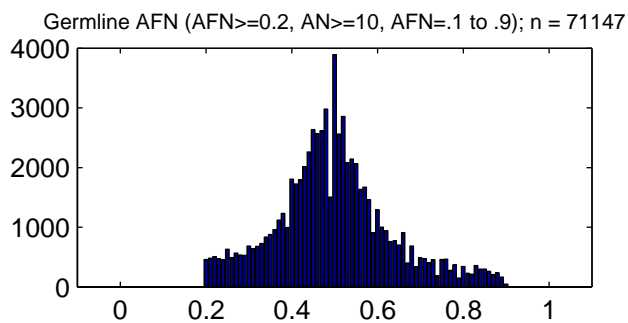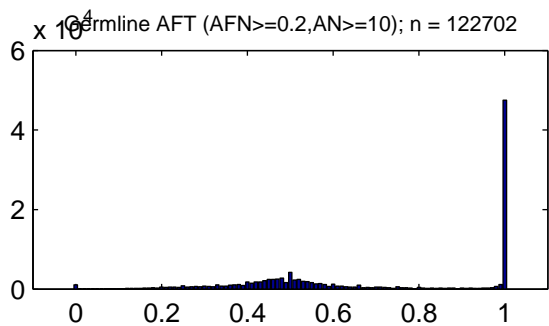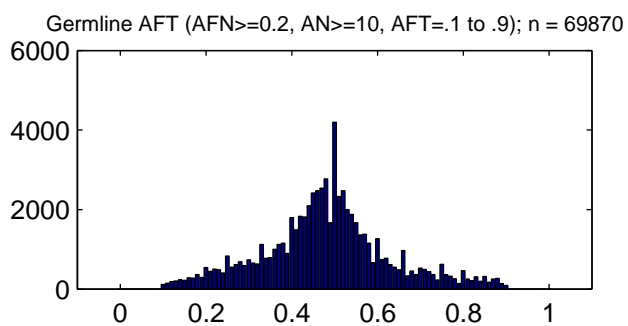



312\_ucsc.edu\_BRCA.IlluminaGA\_DNASeq.Level\_2.10.0.0 -- TCGA-BH-A0DK\_V

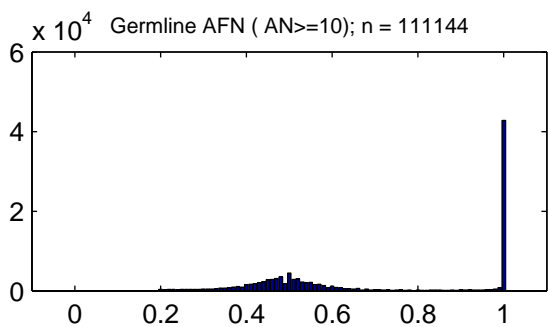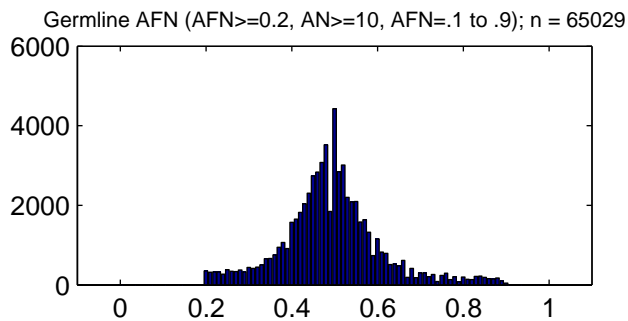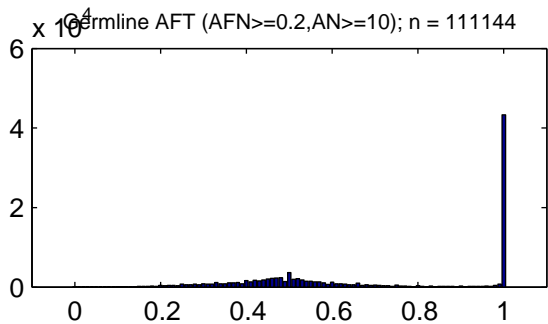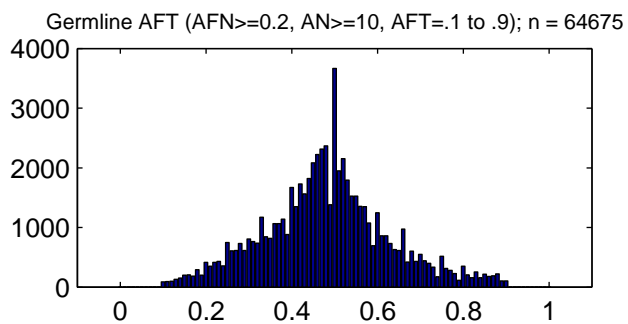

313\_ucsc.edu\_BRCA.IlluminaGA\_DNASeq.Level\_2.2.0.0 -- TCGA-A2-A0EO\_W

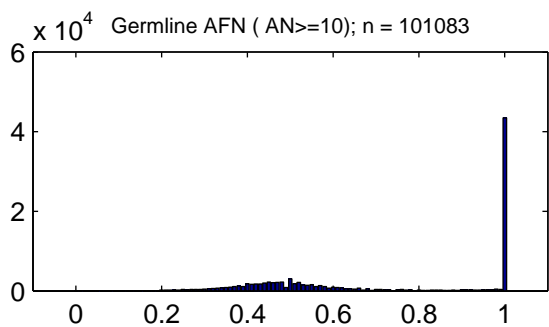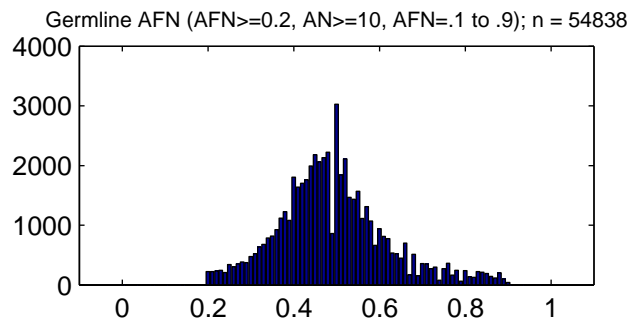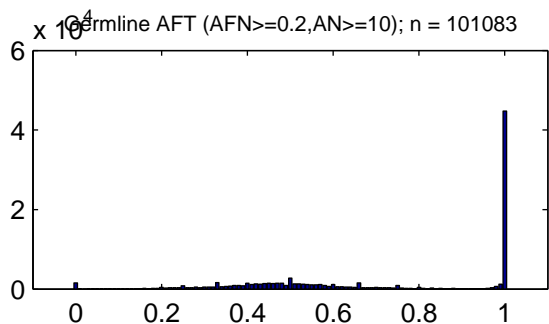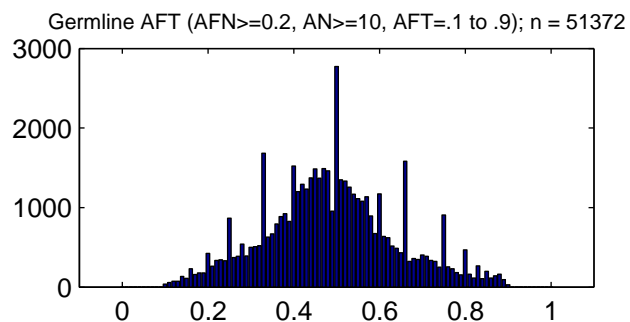

314\_ucsc.edu\_BRCA.IlluminaGA\_DNASeq.Level\_2.3.0.0 -- TCGA-A7-A0DB\_W

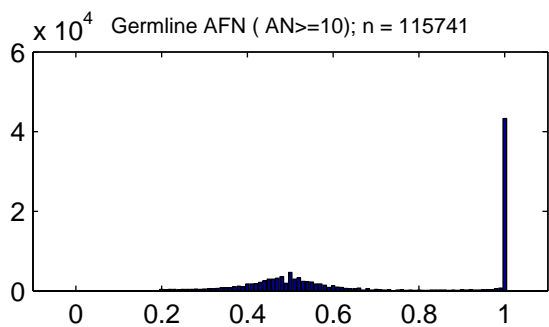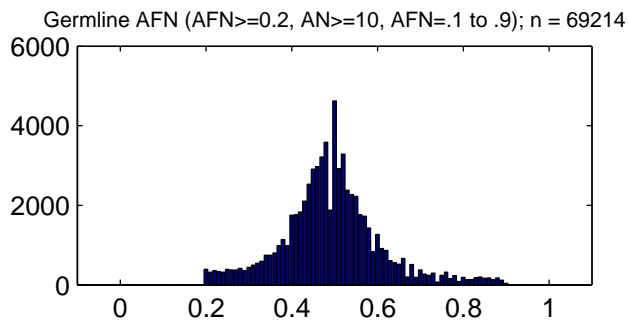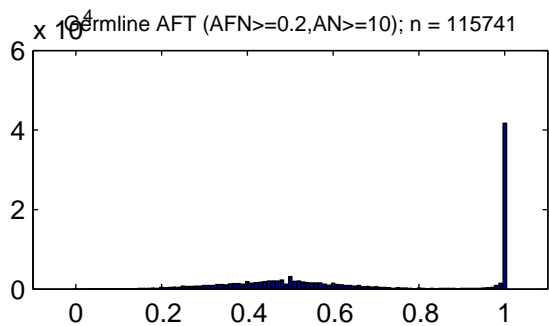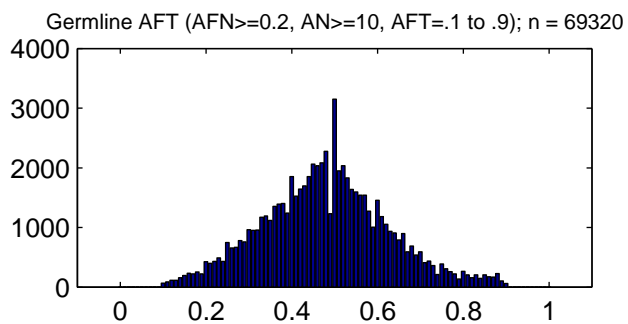

315\_ucsc.edu\_BRCA.IlluminaGA\_DNASeq.Level\_2.11.0.0 -- TCGA-C8-A1HI\_D

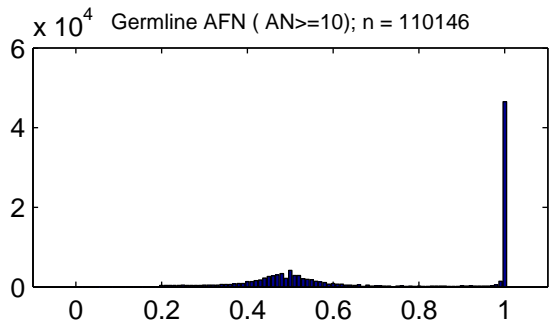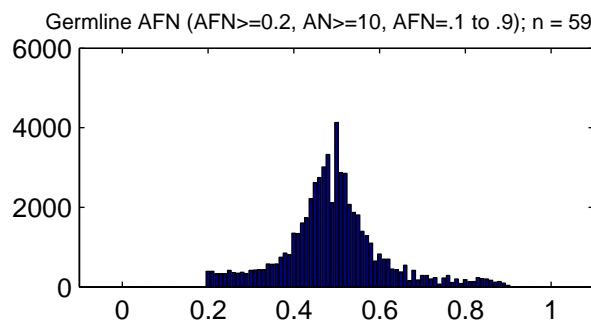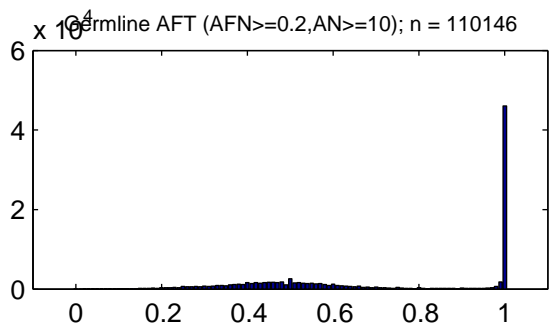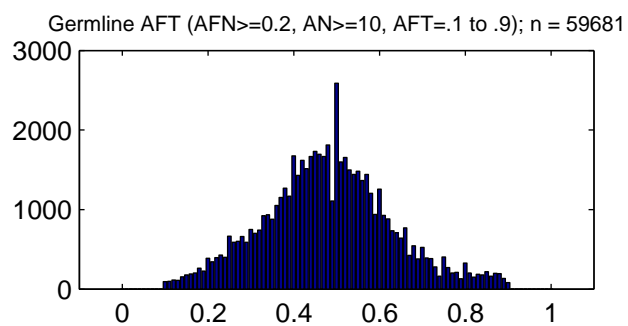

316\_ucsc.edu\_BRCA.IlluminaGA\_DNASeq.Level\_2.1.0.0 -- TCGA-A1-A0SM\_D

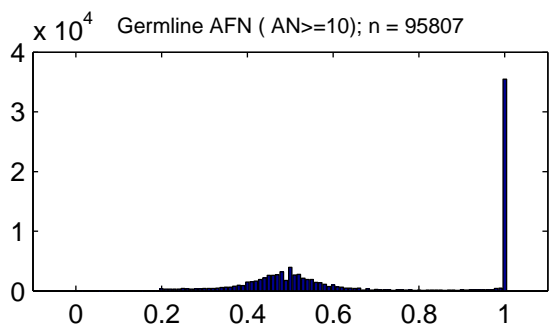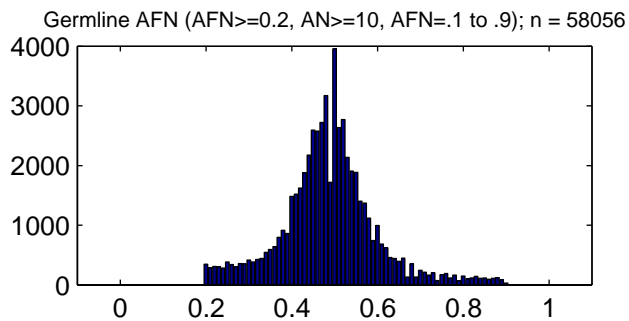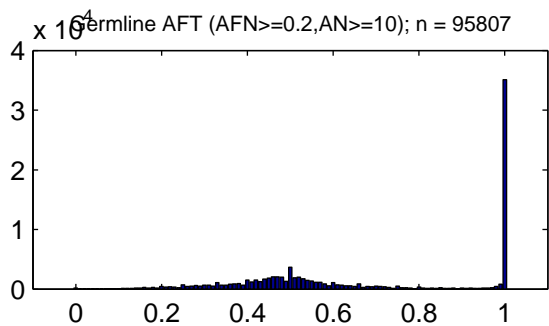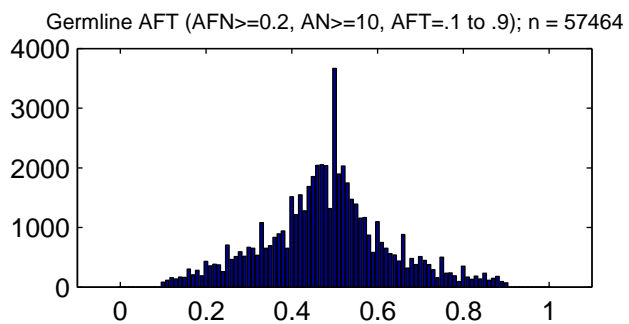

317\_ucsc.edu\_BRCA.IlluminaGA\_DNASeq.Level\_2.10.0.0 -- TCGA-BH-A1ES\_I

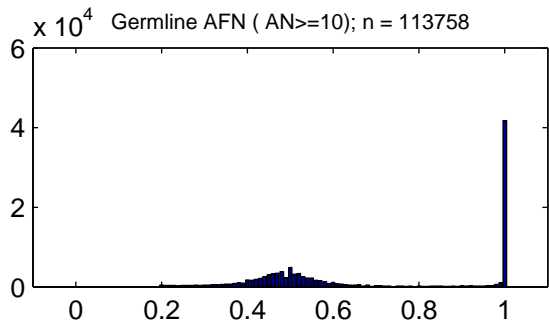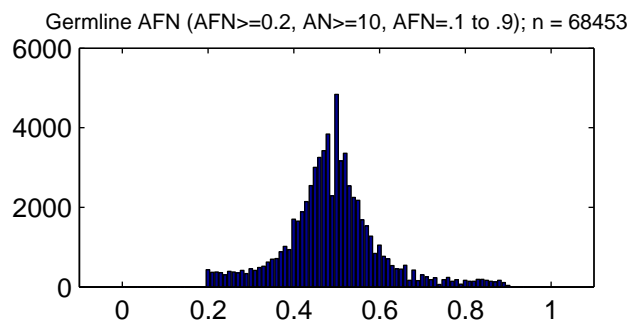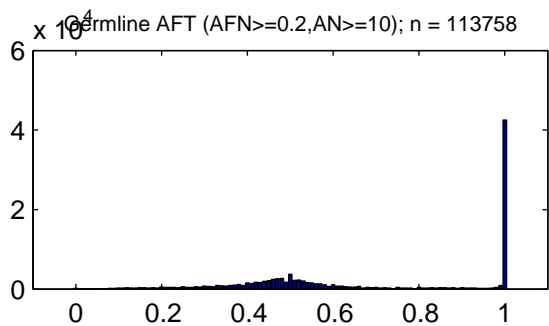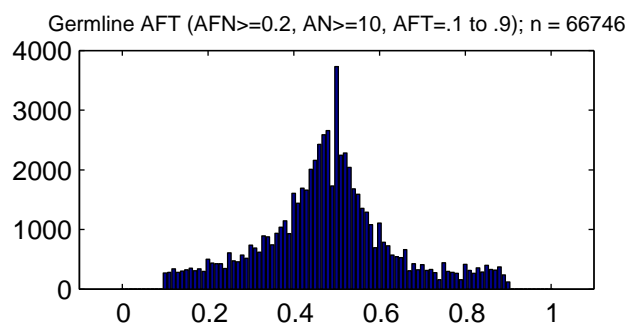

318\_ucsc.edu\_BRCA.IlluminaGA\_DNASeq.Level\_2.10.0.0 -- TCGA-BH-A0DS\_V

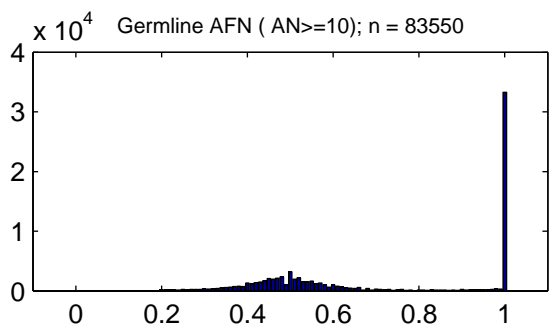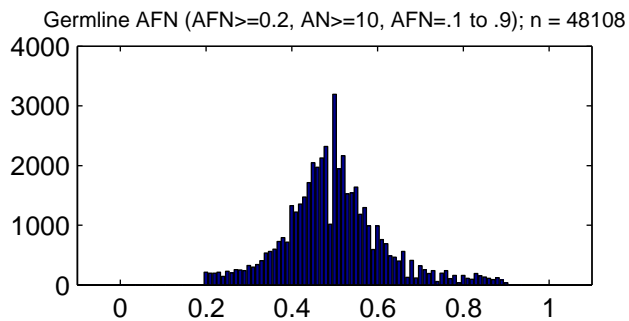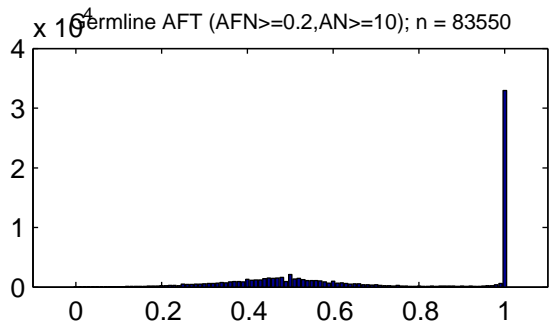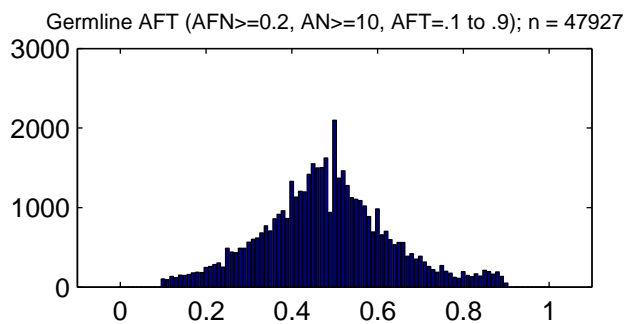

319\_ucsc.edu\_BRCA.IlluminaGA\_DNASeq.Level\_2.8.0.0 -- TCGA-AR-A0U1\_D

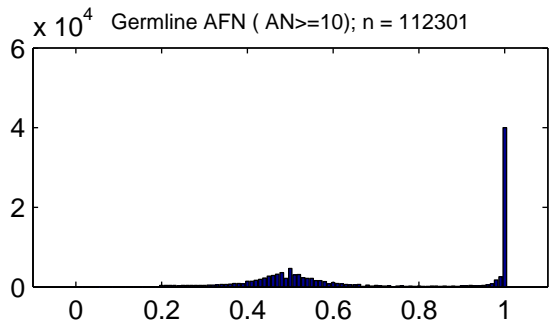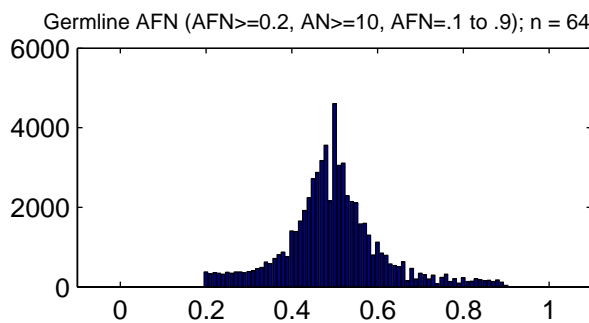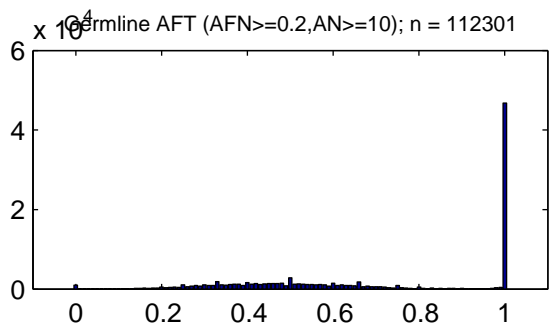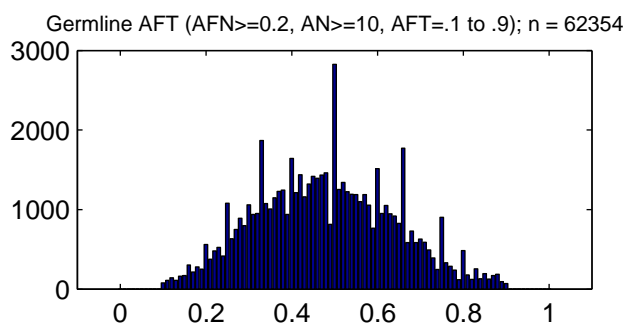



320\_ucsc.edu\_BRCA.IlluminaGA\_DNASeq.Level\_2.9.0.0 -- TCGA-B6-A0IA\_W

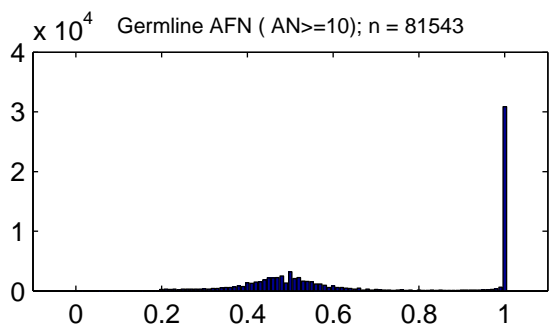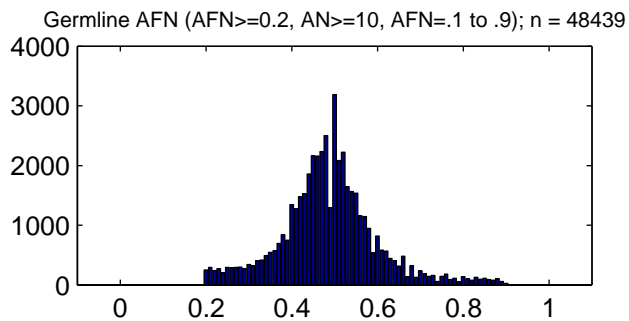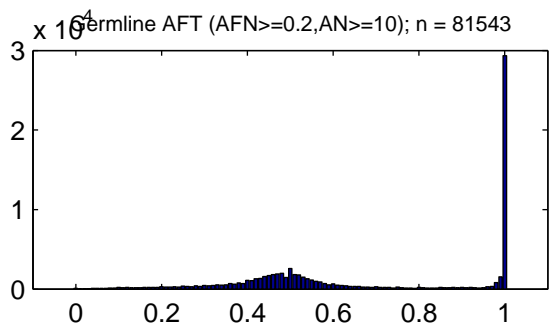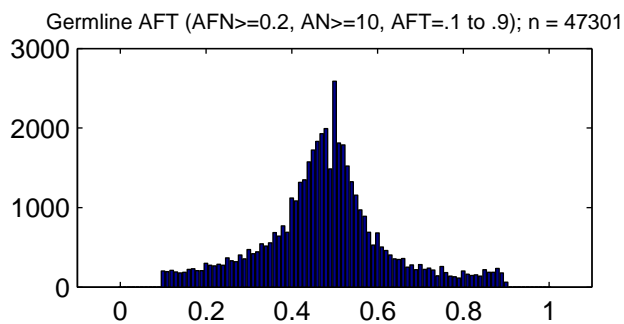

321\_ucsc.edu\_BRCA.IlluminaGA\_DNASeq.Level\_2.2.0.0 -- TCGA-A2-A04X\_W

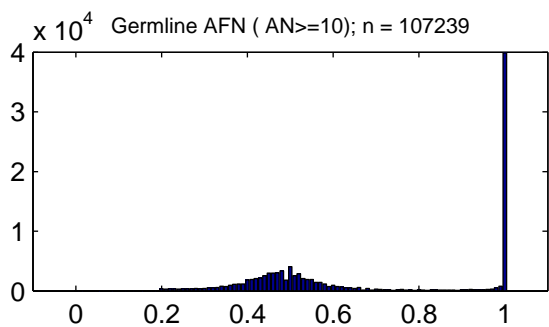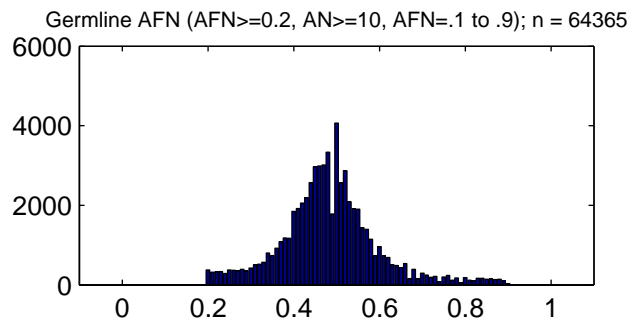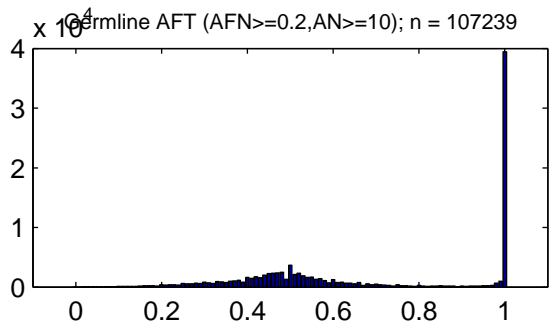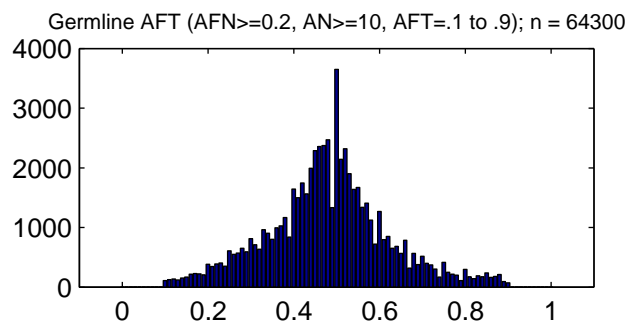

322\_ucsc.edu\_BRCA.IlluminaGA\_DNASeq.Level\_2.13.0.0 -- TCGA-E2-A105\_D

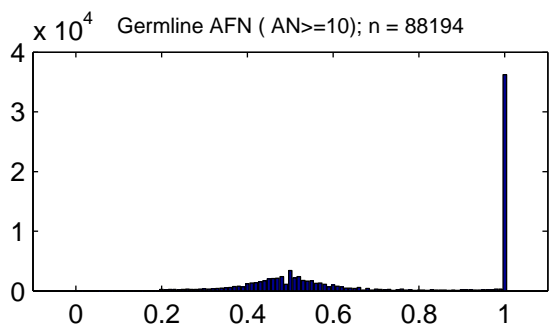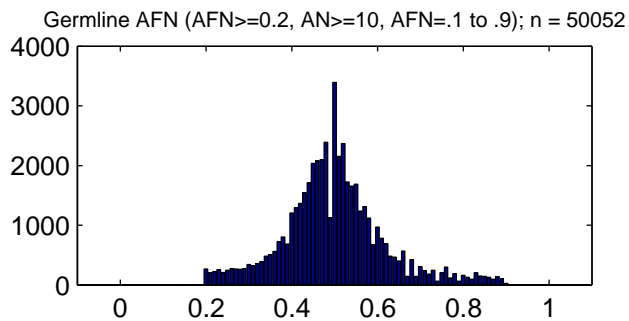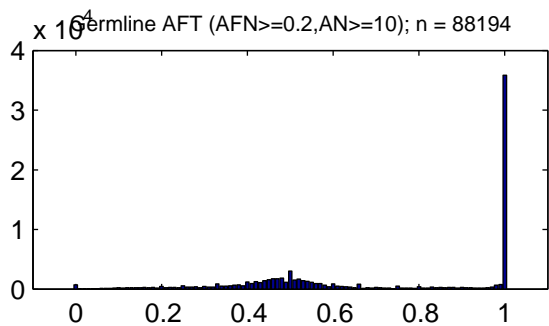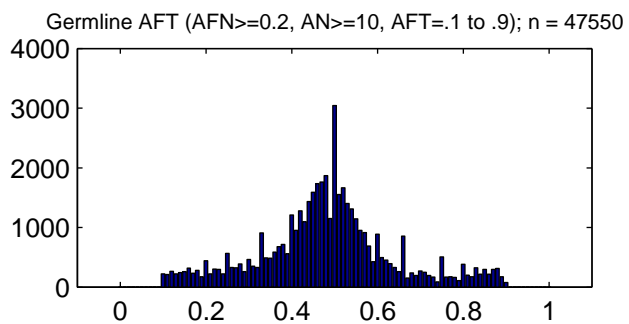

323\_ucsc.edu\_BRCA.IlluminaGA\_DNASeq.Level\_2.4.0.0 -- TCGA-A8-A09X\_W

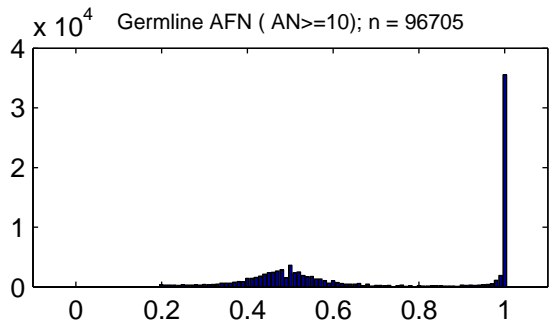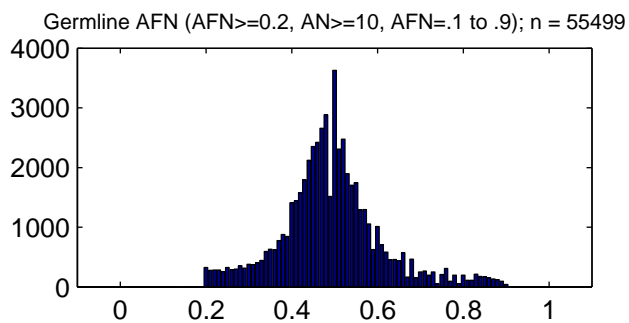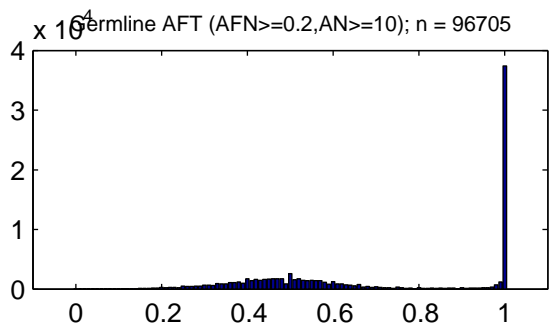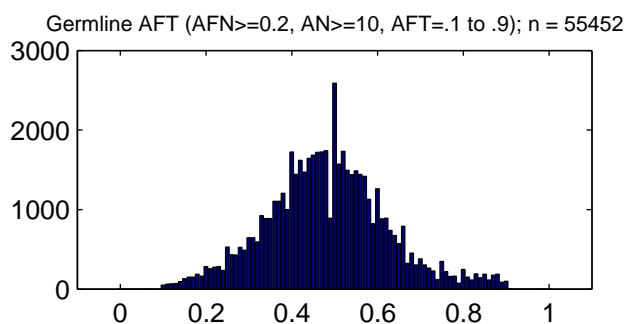

324\_ucsc.edu\_BRCA.IlluminaGA\_DNASeq.Level\_2.5.0.0 --- TCGA-AN-A0AM\_V

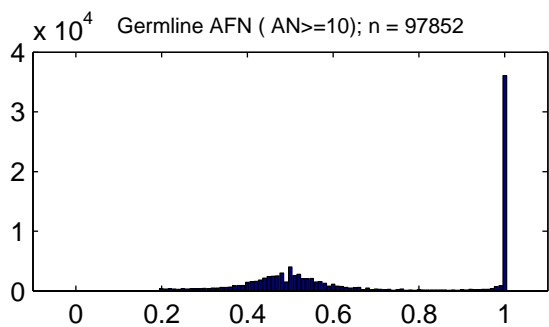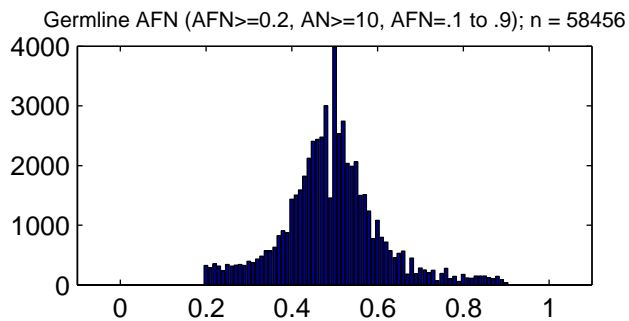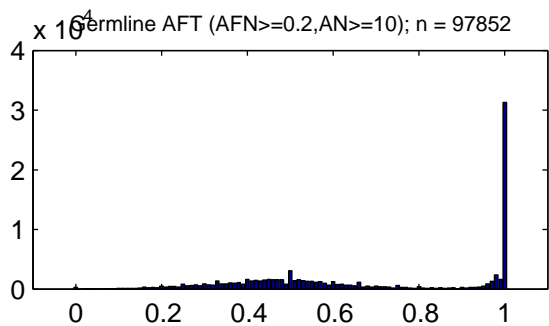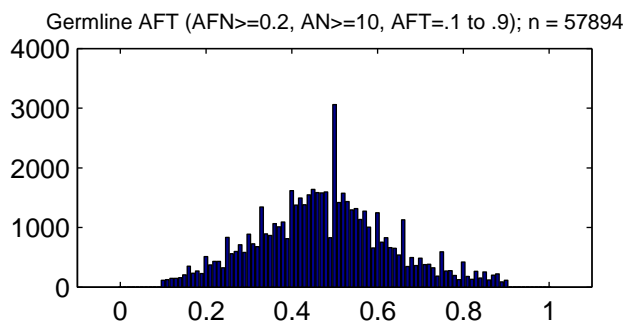

325\_ucsc.edu\_BRCA.IlluminaGA\_DNASeq.Level\_2.6.0.0 -- TCGA-AO-A12E\_D

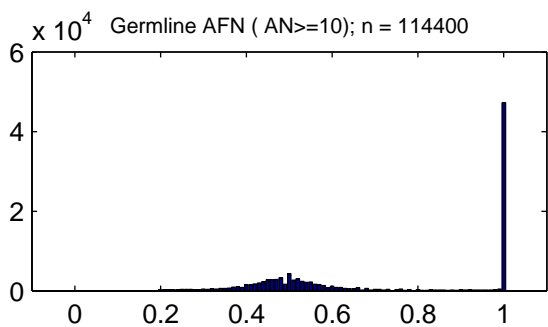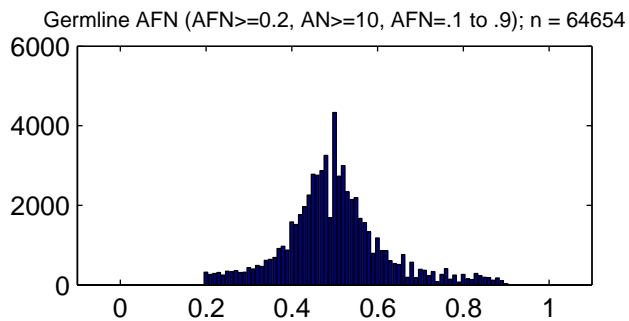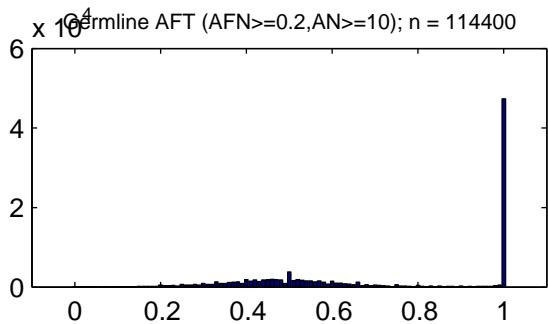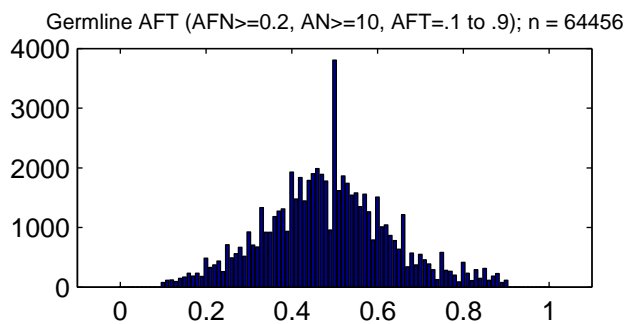

326\_ucsc.edu\_BRCA.IlluminaGA\_DNASeq.Level\_2.6.0.0 -- TCGA-AO-A03R\_W

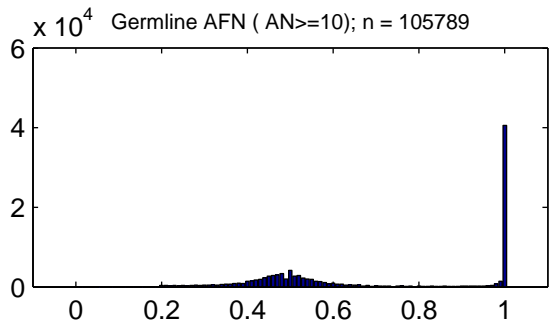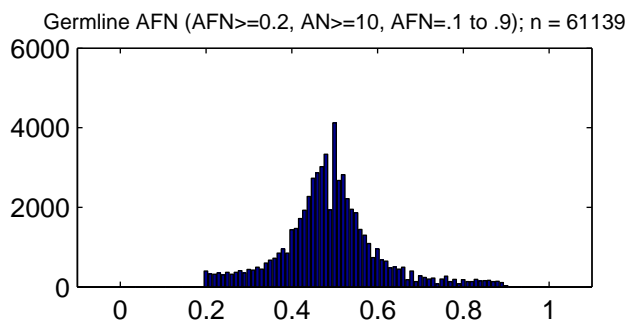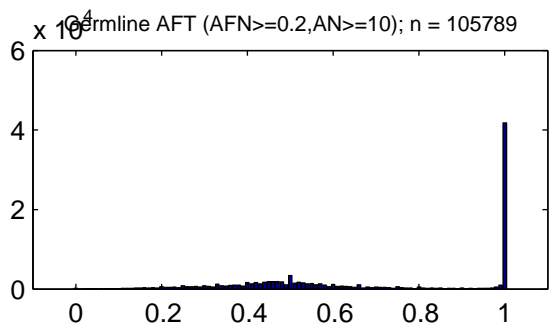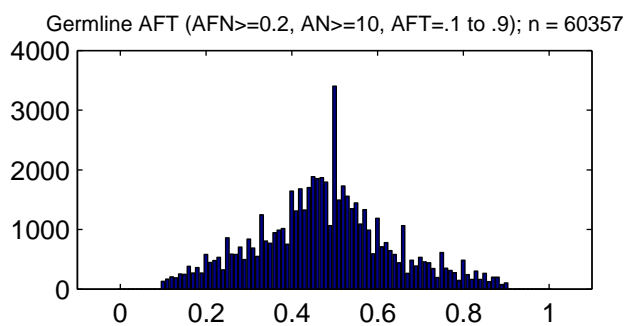

327\_ucsc.edu\_BRCA.IlluminaGA\_DNASeq.Level\_2.8.0.0 -- TCGA-AR-A0TX\_D

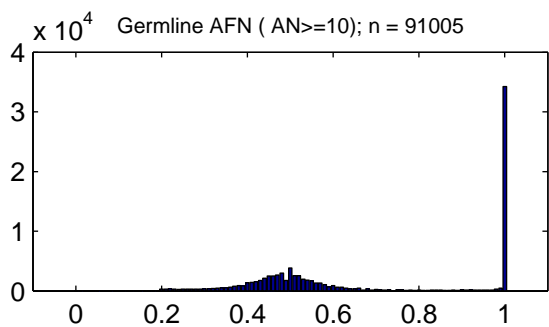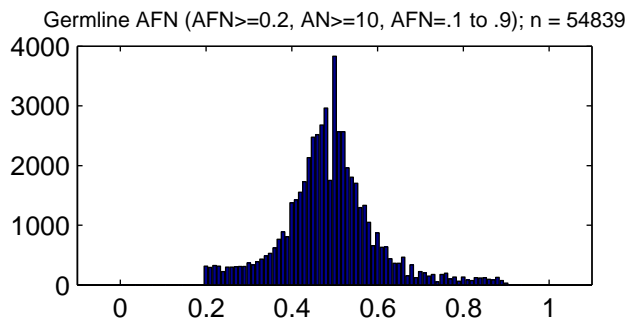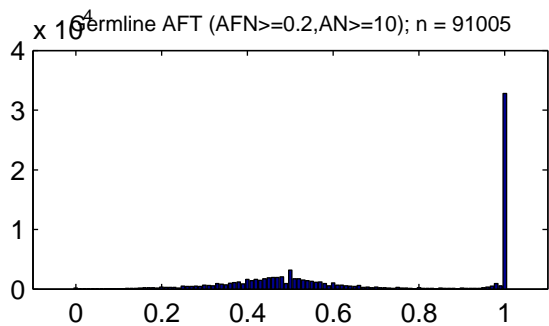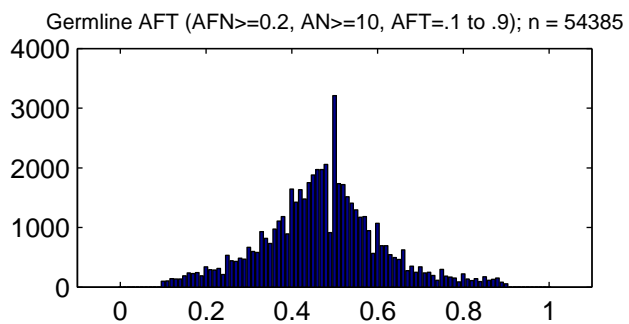



328\_ucsc.edu\_BRCA.IlluminaGA\_DNASeq.Level\_2.13.0.0 -- TCGA-E2-A15H\_C

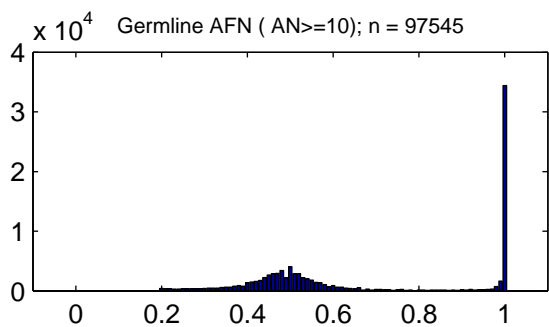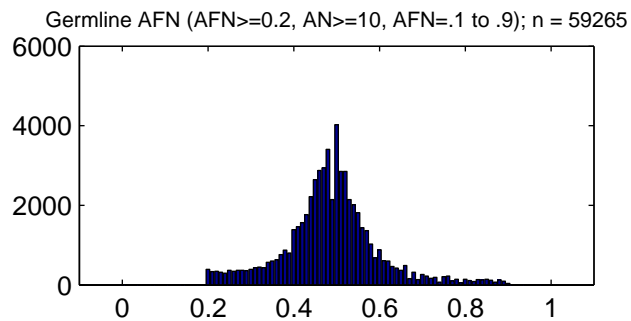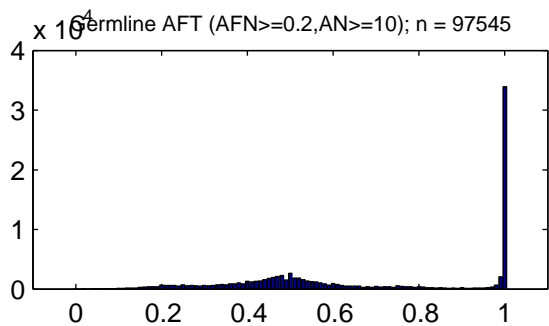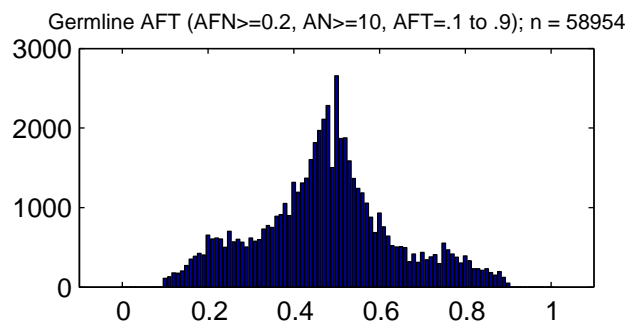

329\_ucsc.edu\_BRCA.IlluminaGA\_DNASeq.Level\_2.9.0.0 -- TCGA-B6-A0WZ\_D

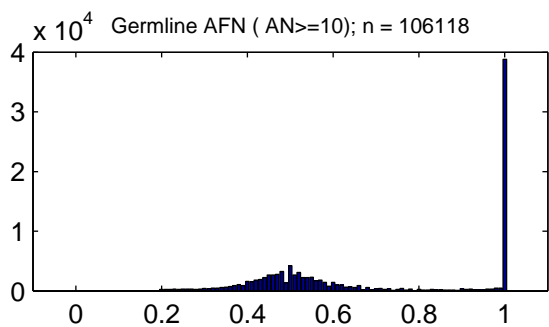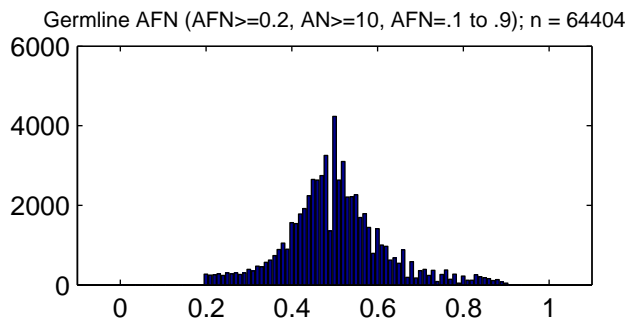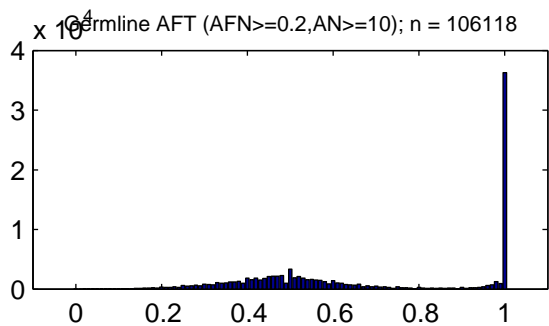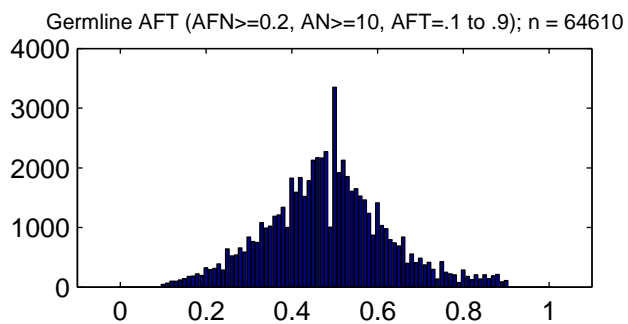

330\_ucsc.edu\_BRCA.IlluminaGA\_DNASeq.Level\_2.10.0.0 -- TCGA-BH-A1EW\_I

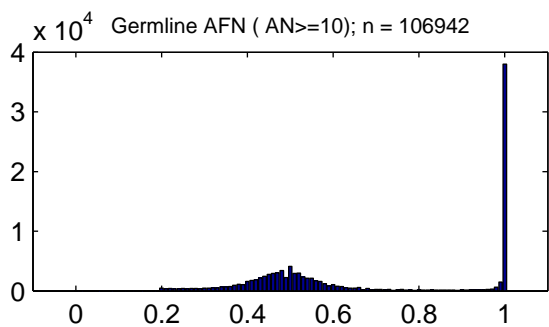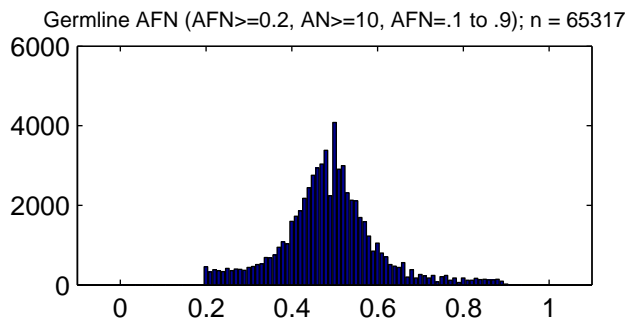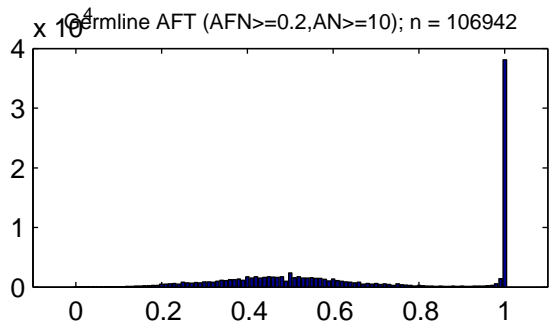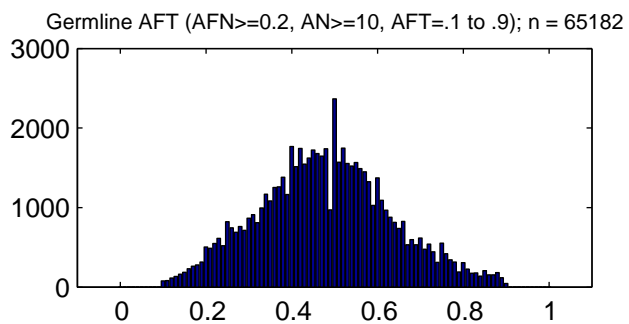

331\_ucsc.edu\_BRCA.IlluminaGA\_DNASeq.Level\_2.10.0.0 -- TCGA-BH-A0AZ\_C

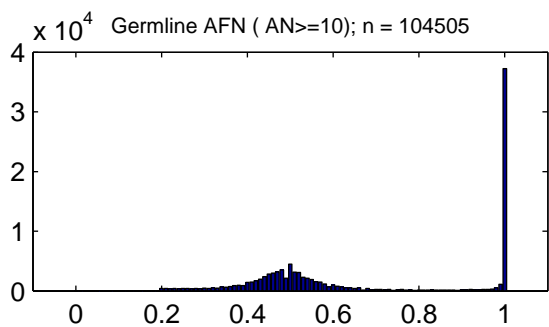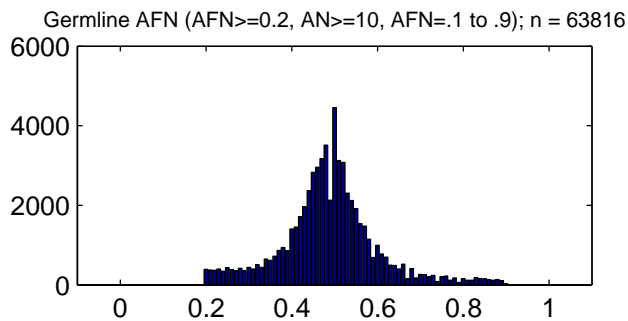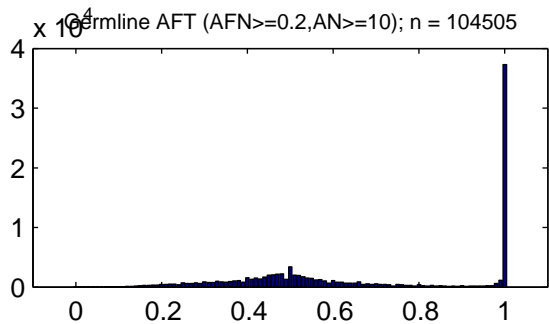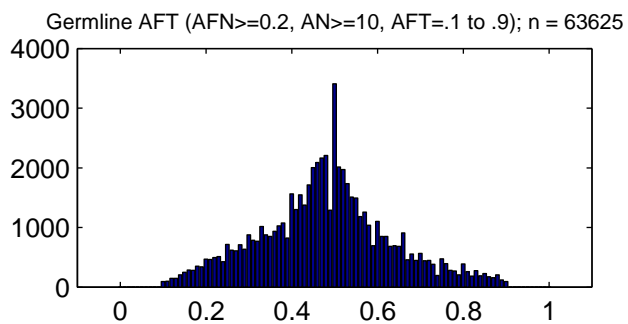

332\_ucsc.edu\_BRCA.IlluminaGA\_DNASeq.Level\_2.13.0.0 -- TCGA-E2-A14X\_C

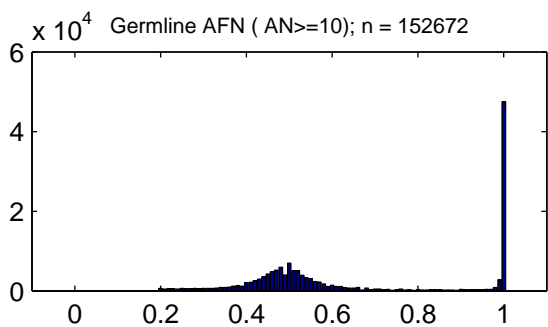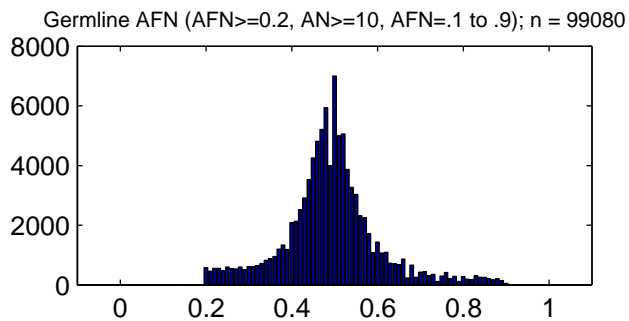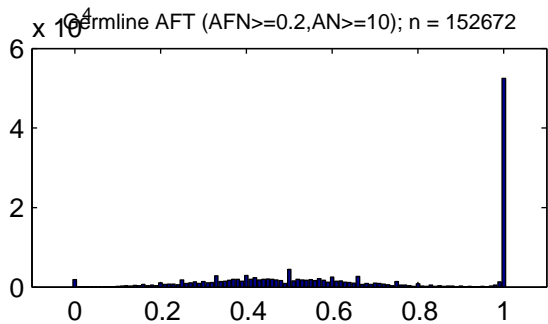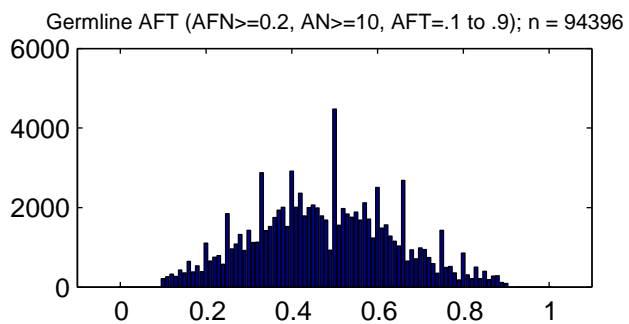

333\_ucsc.edu\_BRCA.IlluminaGA\_DNASeq.Level\_2.4.0.0 -- TCGA-A8-A06P\_W

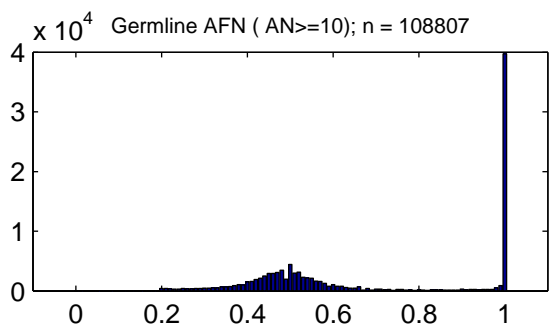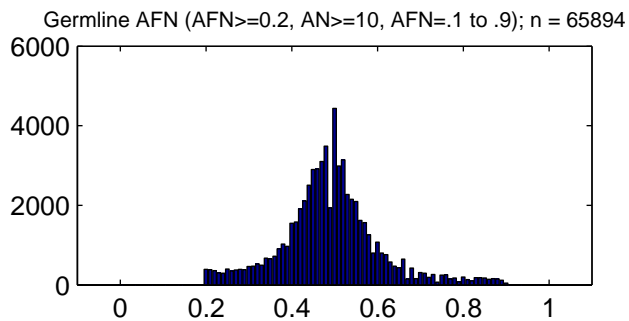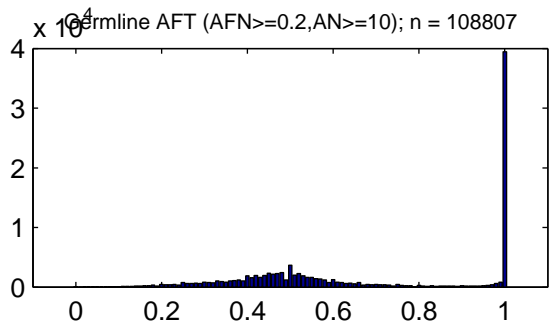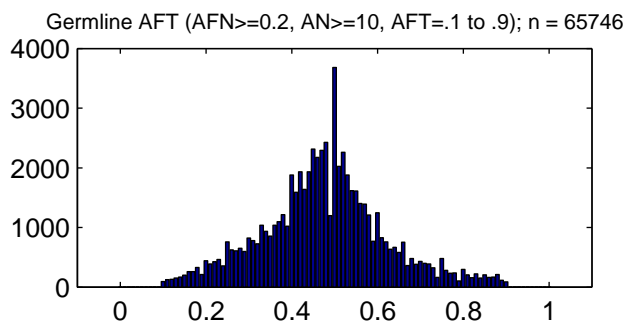

334\_ucsc.edu\_BRCA.IlluminaGA\_DNASeq.Level\_2.4.0.0 -- TCGA-A8-A096\_W

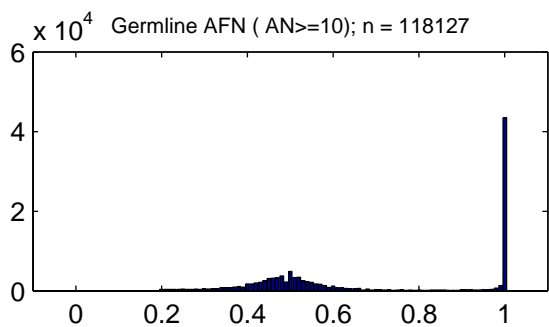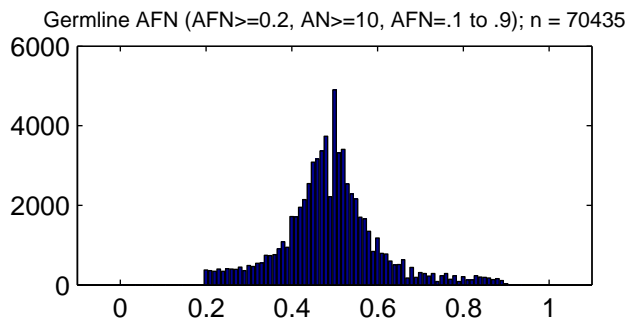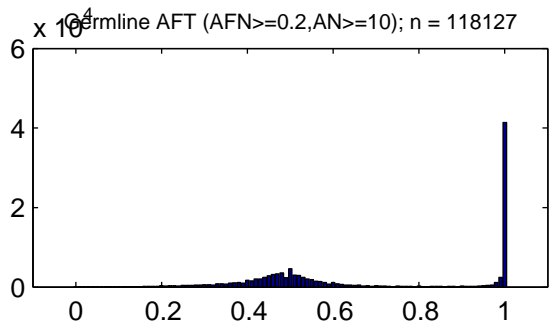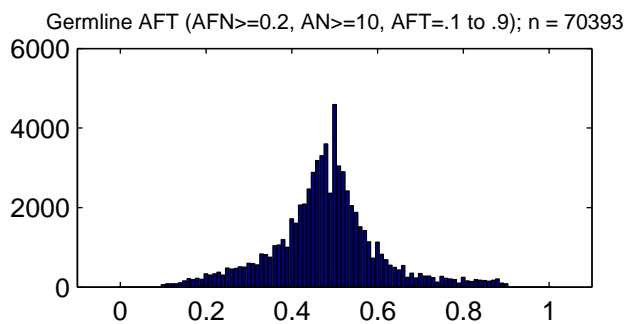

335\_ucsc.edu\_BRCA.IlluminaGA\_DNASeq.Level\_2.4.0.0 -- TCGA-A8-A08A\_W

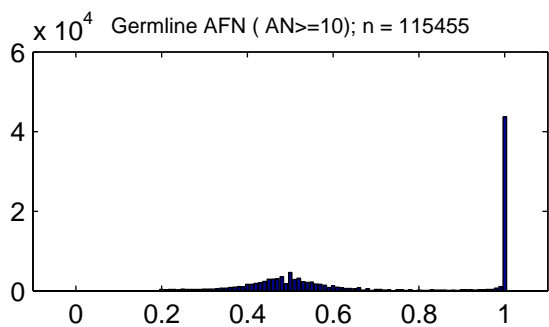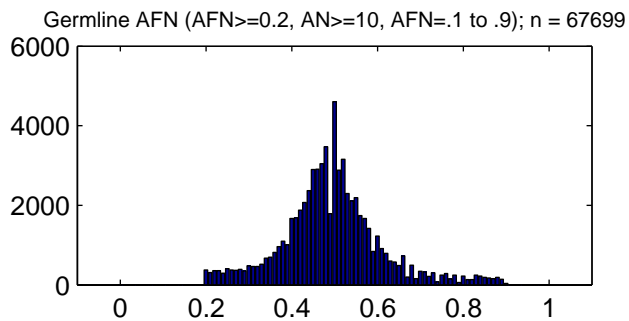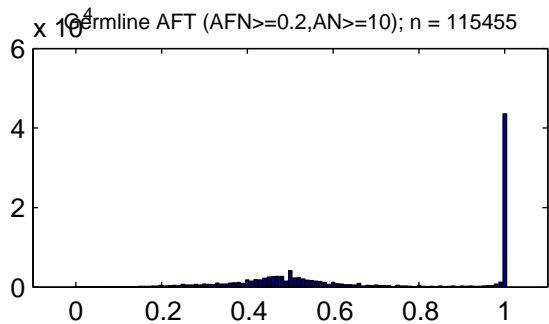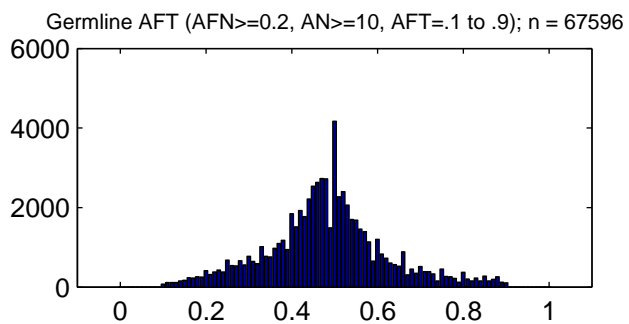



336\_ucsc.edu\_BRCA.IlluminaGA\_DNASeq.Level\_2.10.0.0 -- TCGA-BH-A0BJ\_V

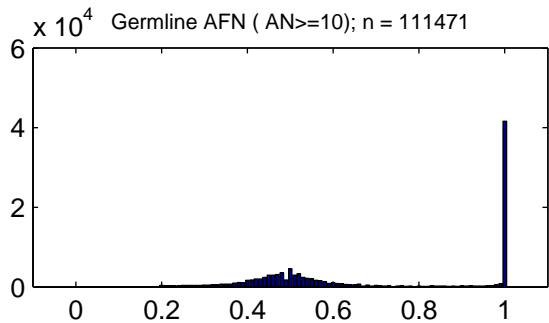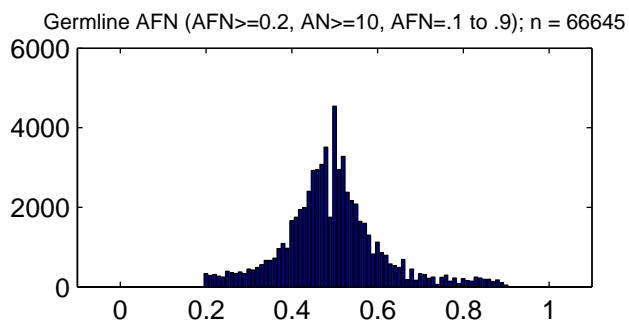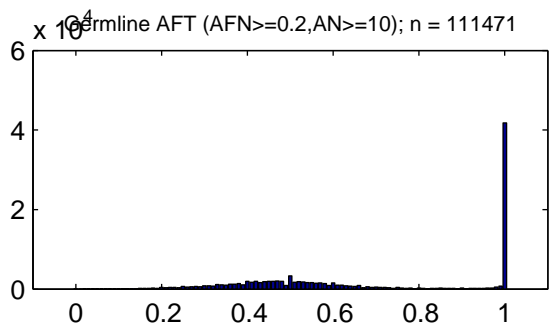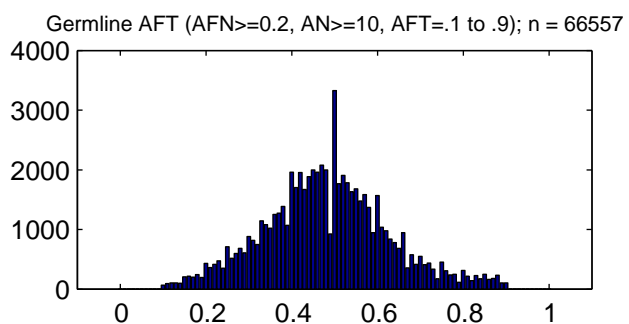

337\_ucsc.edu\_BRCA.IlluminaGA\_DNASeq.Level\_2.4.0.0 -- TCGA-A8-A07E\_W

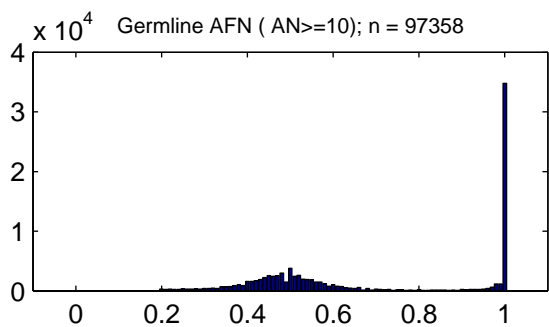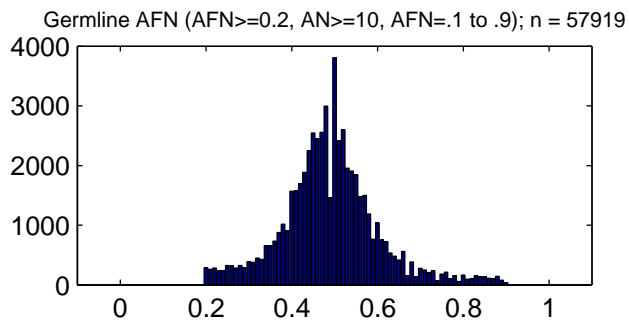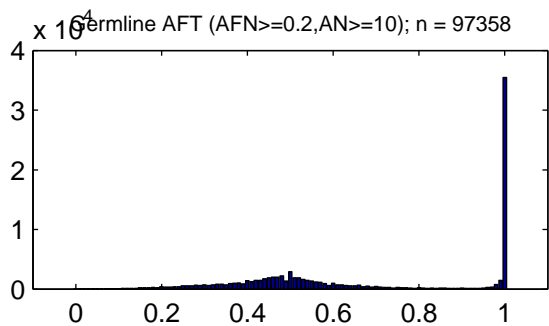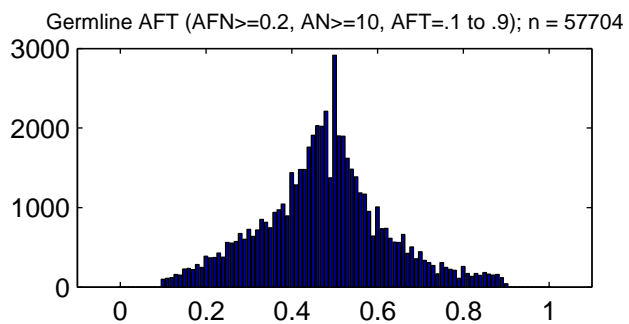

338\_ucsc.edu\_BRCA.IlluminaGA\_DNASeq.Level\_2.10.0.0 -- TCGA-BH-A0GZ\_V

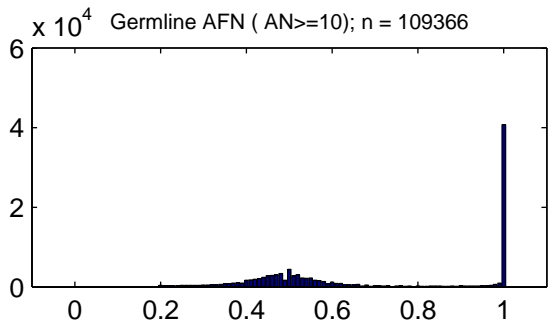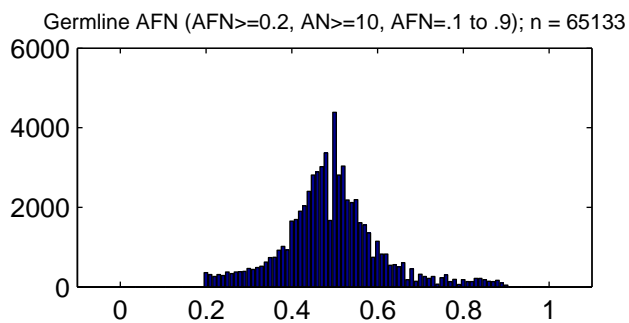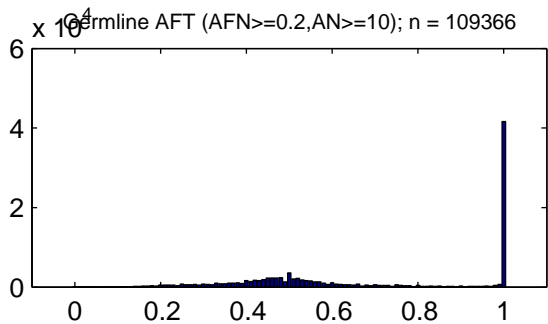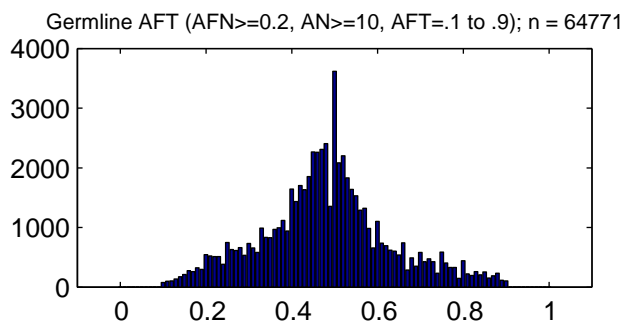

339\_ucsc.edu\_BRCA.IlluminaGA\_DNASeq.Level\_2.9.0.0 -- TCGA-B6-A0X4\_D

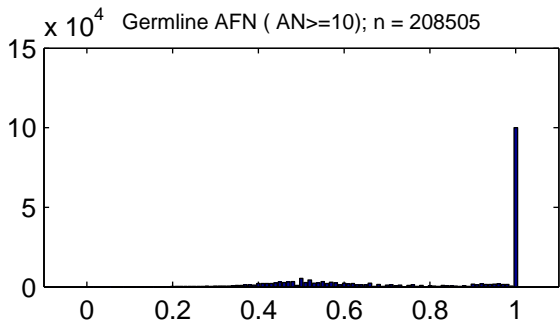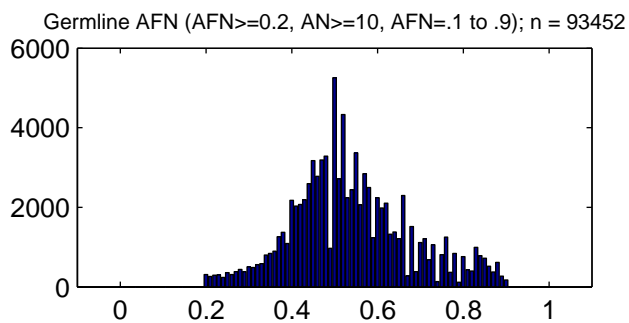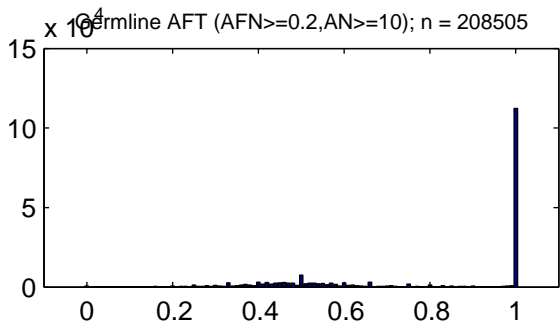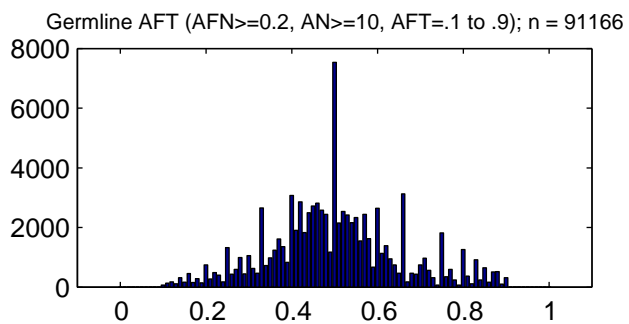

340\_ucsc.edu\_BRCA.IlluminaGA\_DNASeq.Level\_2.13.0.0 -- TCGA-E2-A14Y\_C

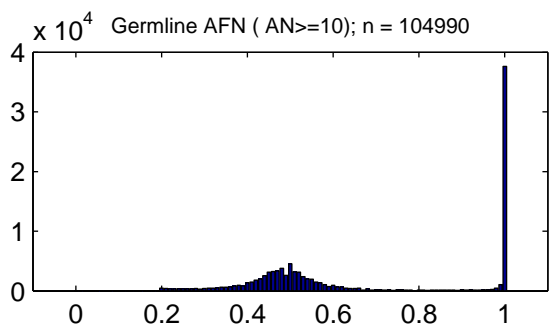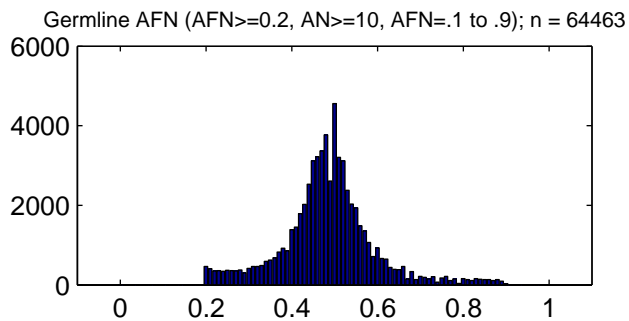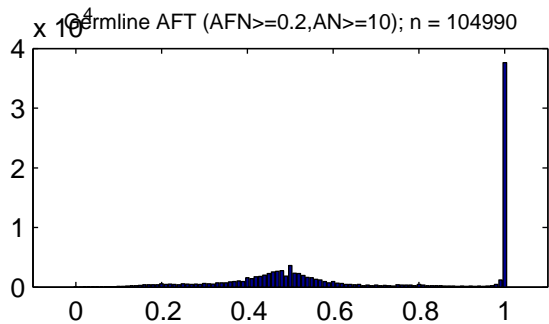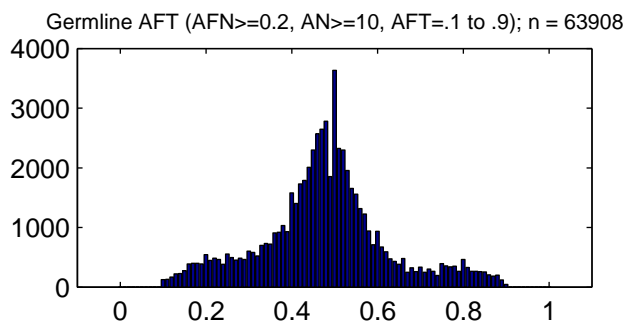

341\_ucsc.edu\_BRCA.IlluminaGA\_DNASeq.Level\_2.13.0.0 -- TCGA-E2-A154\_D

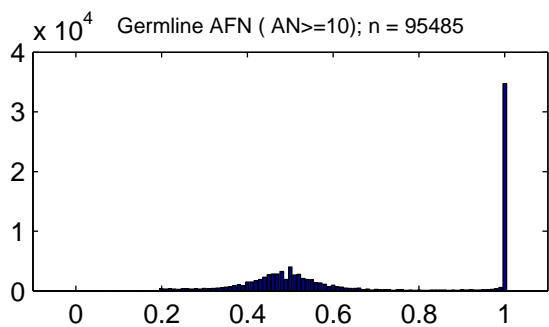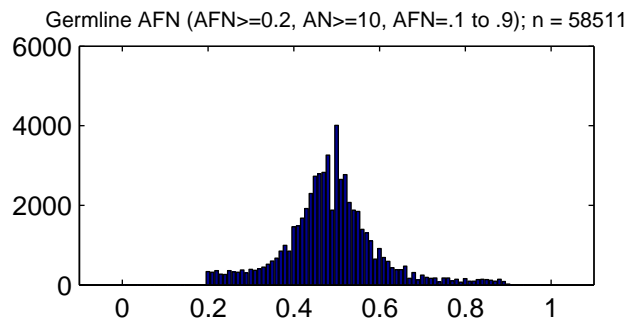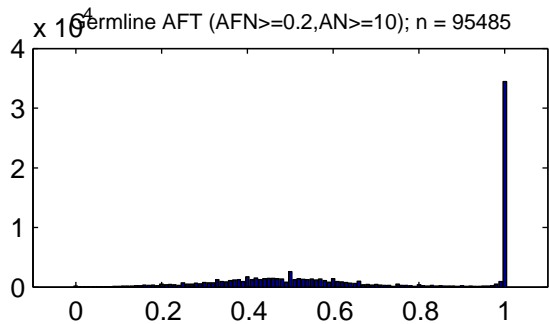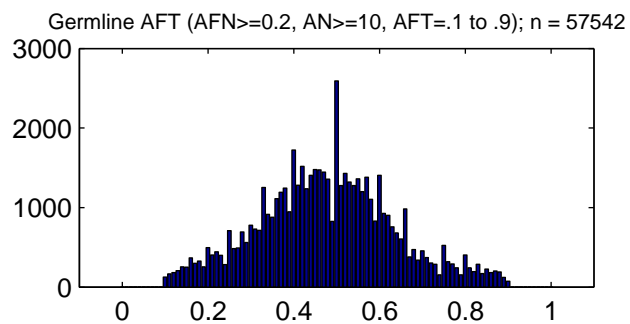

342\_ucsc.edu\_BRCA.IlluminaGA\_DNASeq.Level\_2.13.0.0 -- TCGA-E2-A10A\_C

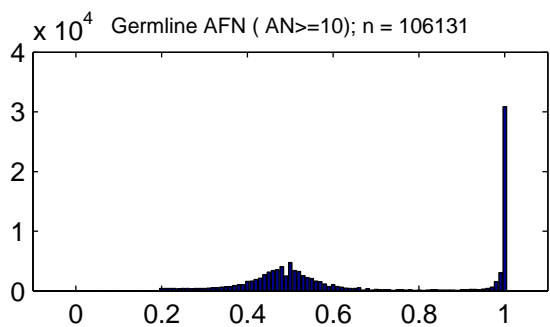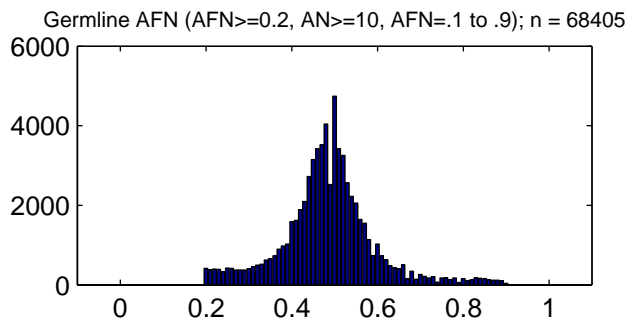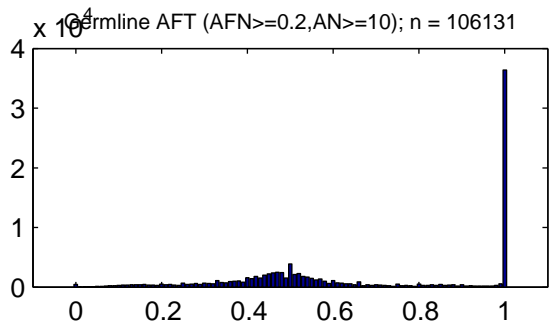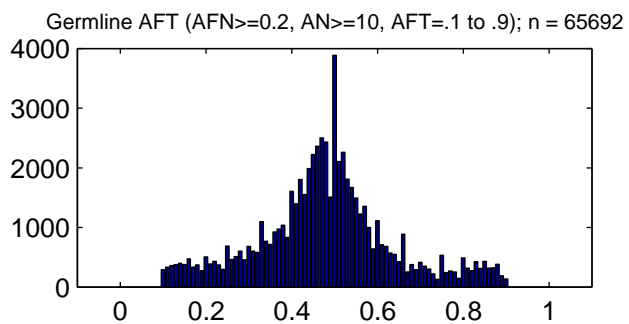

343\_ucsc.edu\_BRCA.IlluminaGA\_DNASeq.Level\_2.8.0.0 -- TCGA-AR-A1AN\_D

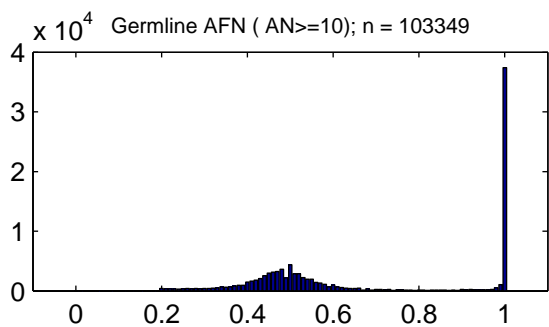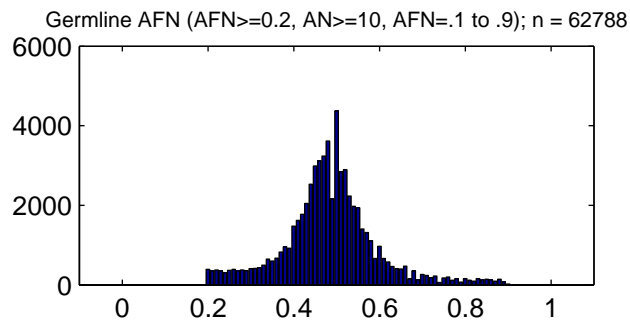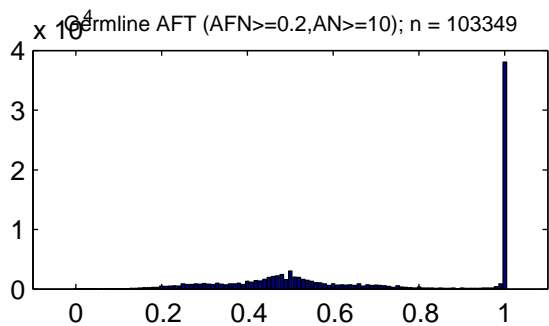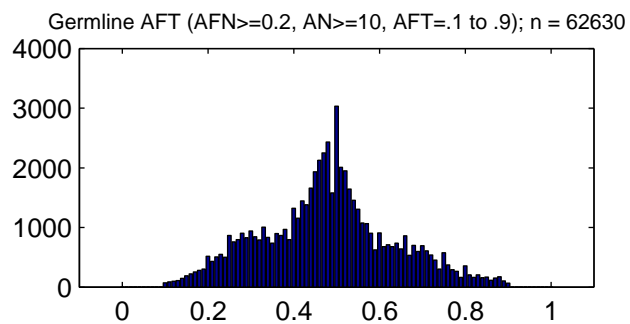



344\_ucsc.edu\_BRCA.IlluminaGA\_DNASeq.Level\_2.10.0.0 -- TCGA-BH-A18P\_C

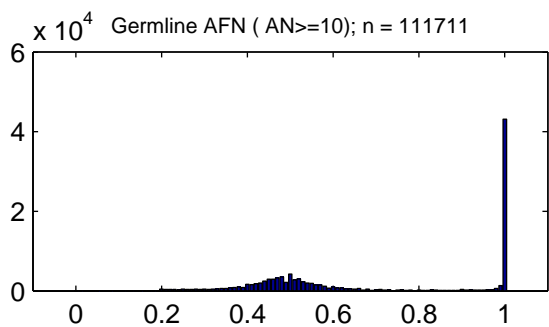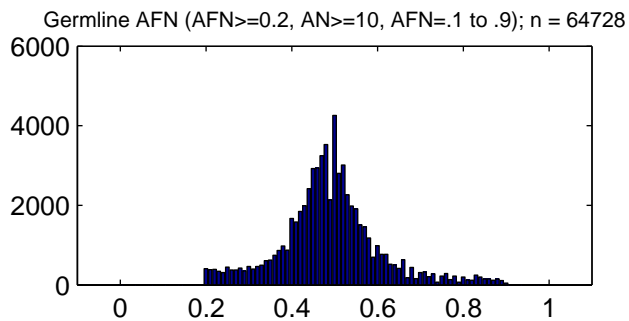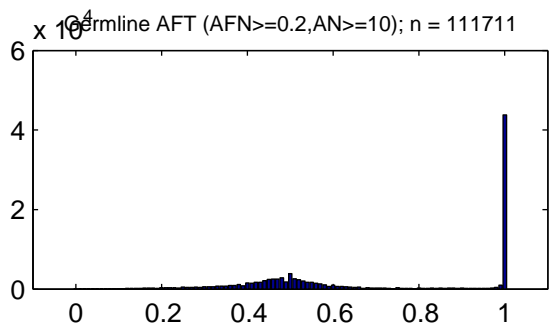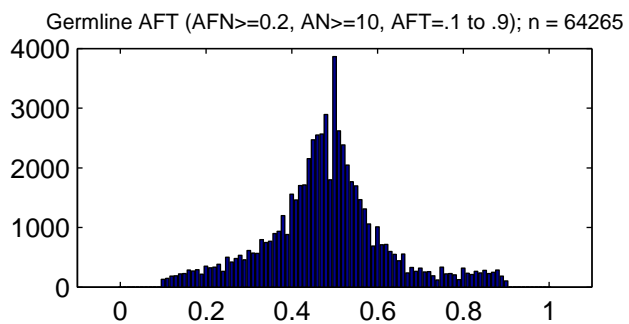

345\_ucsc.edu\_BRCA.IlluminaGA\_DNASeq.Level\_2.10.0.0 -- TCGA-BH-A0DP\_V

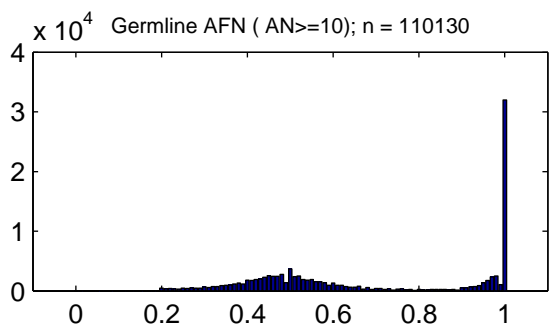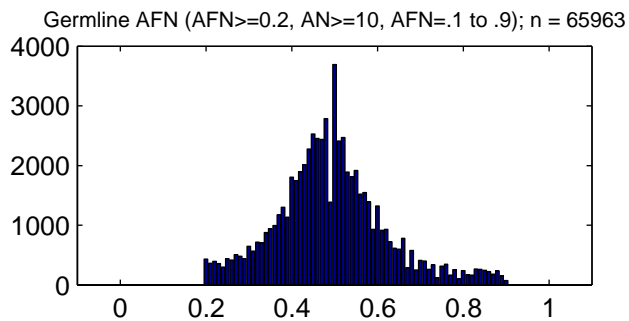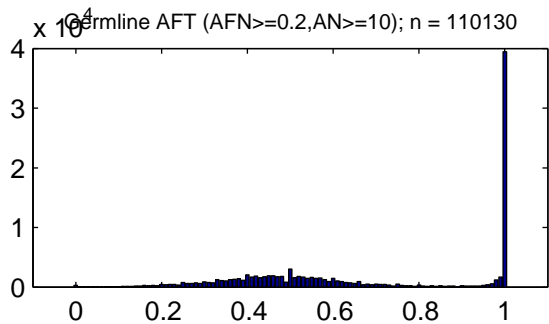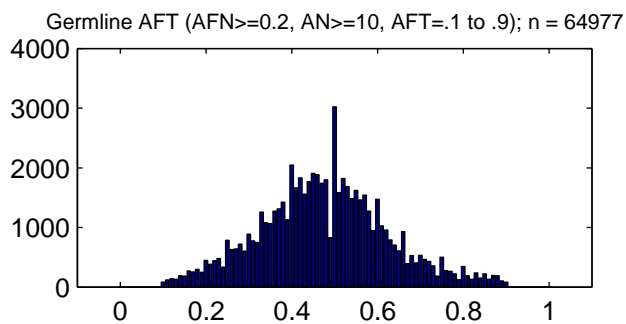

346\_ucsc.edu\_BRCA.IlluminaGA\_DNASeq.Level\_2.2.0.0 -- TCGA-A2-A0CV\_D

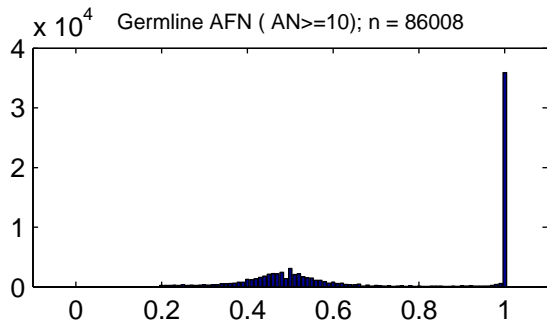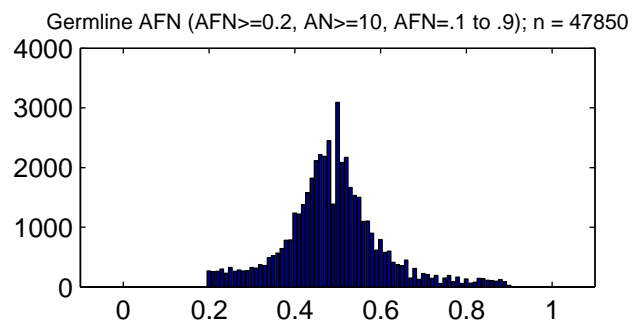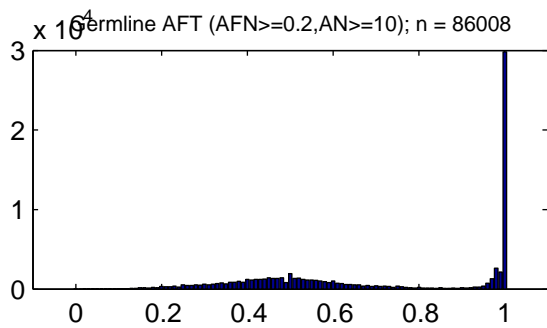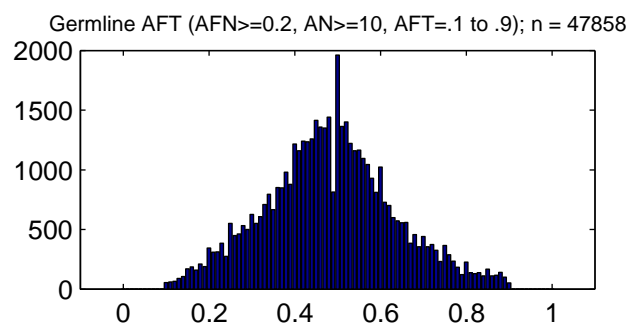

347\_ucsc.edu\_BRCA.IlluminaGA\_DNASeq.Level\_2.10.0.0 -- TCGA-BH-A0H6\_V

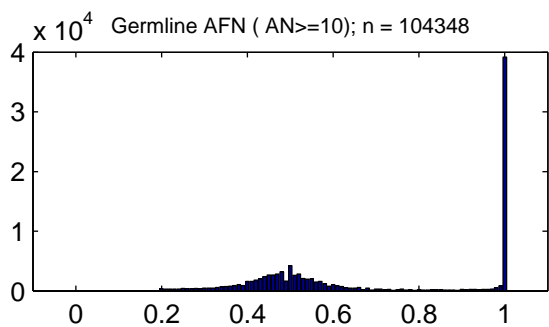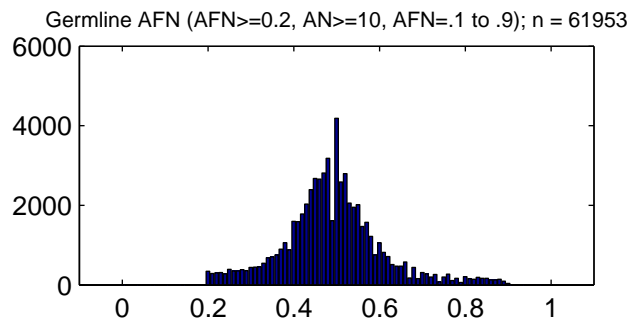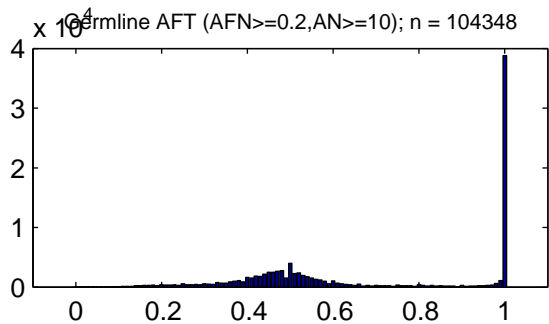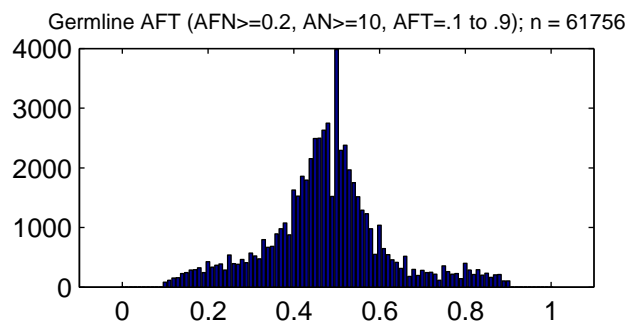

348\_ucsc.edu\_BRCA.IlluminaGA\_DNASeq.Level\_2.10.0.0 -- TCGA-BH-A18I\_D

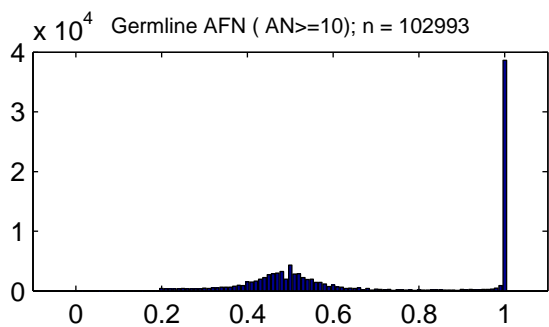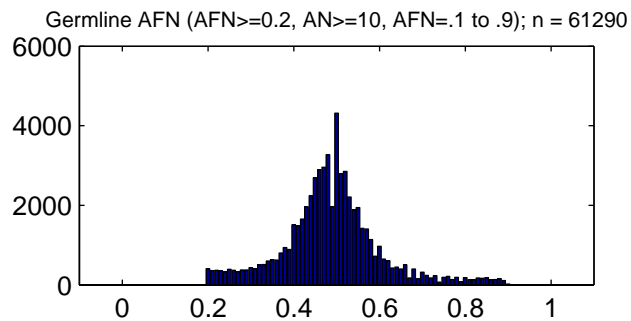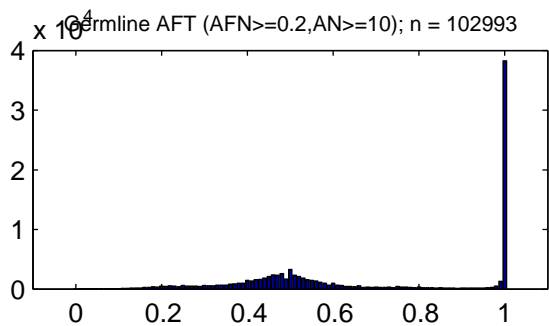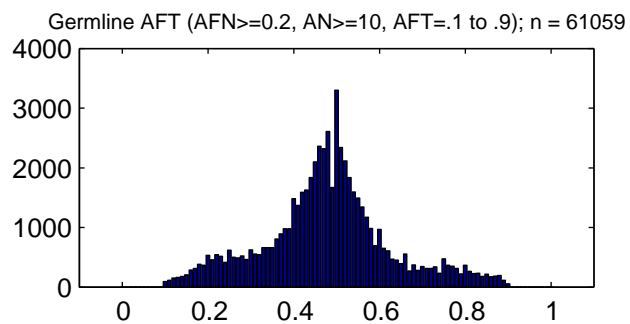

349\_ucsc.edu\_BRCA.IlluminaGA\_DNASeq.Level\_2.13.0.0 -- TCGA-E2-A15E\_C

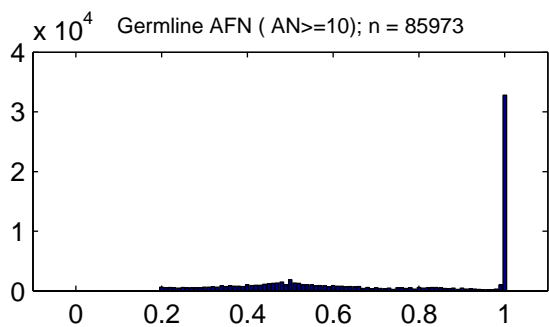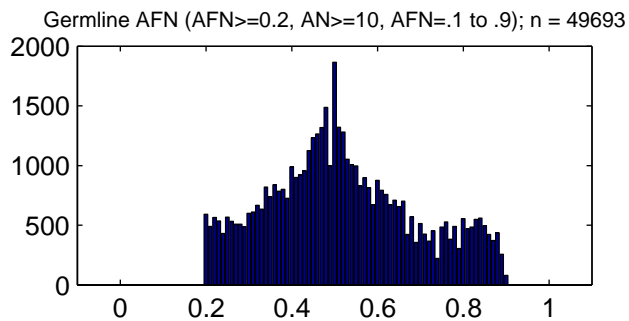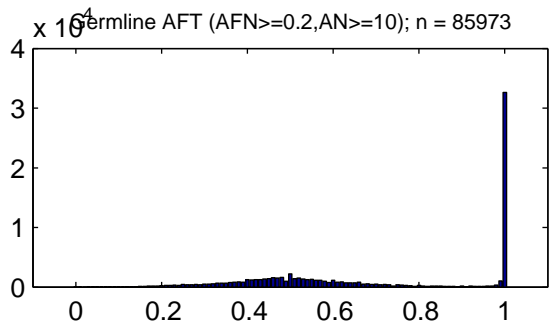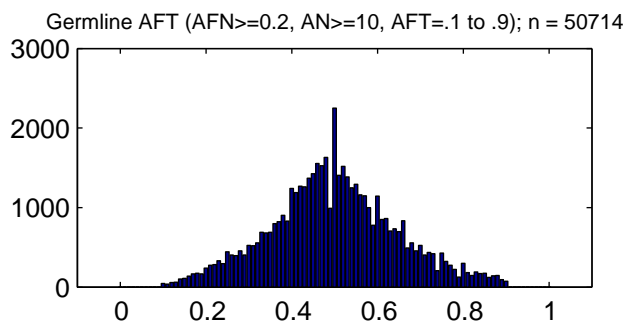

350\_ucsc.edu\_BRCA.IlluminaGA\_DNASeq.Level\_2.10.0.0 -- TCGA-BH-A0HF\_V

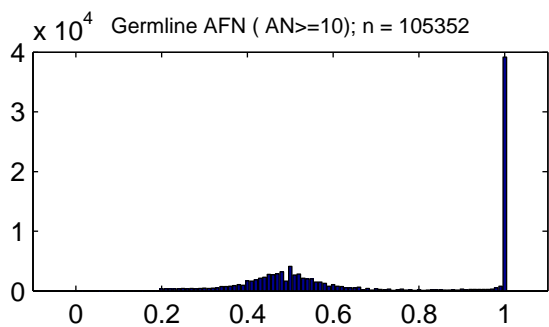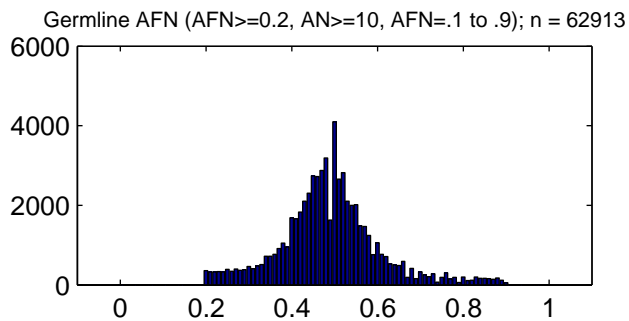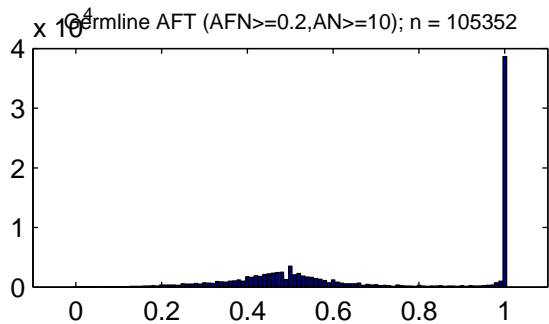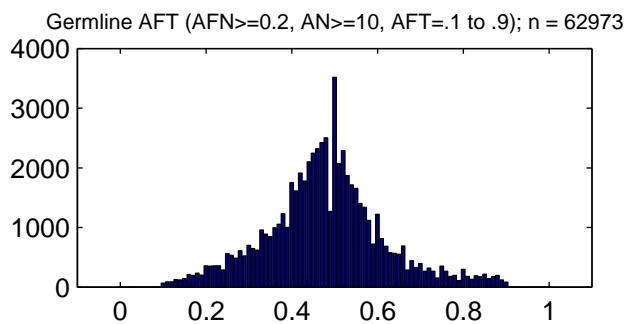

351\_ucsc.edu\_BRCA.IlluminaGA\_DNASeq.Level\_2.14.0.0 -- TCGA-BH-A0B5\_V

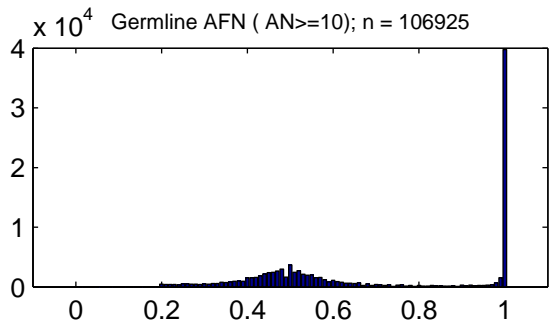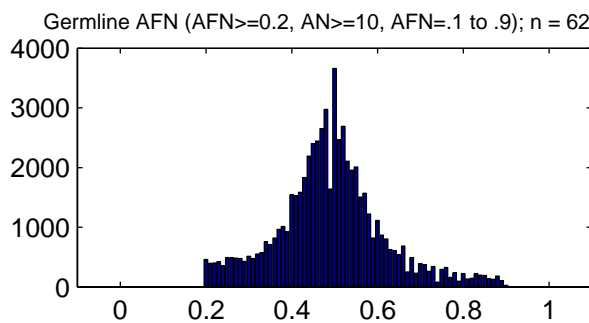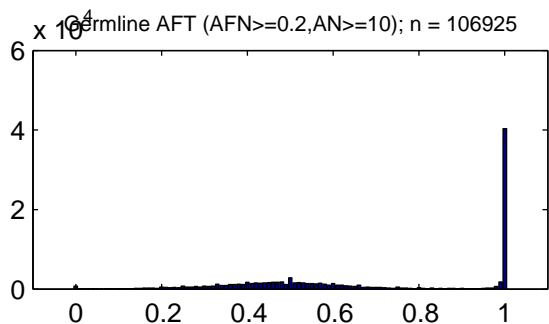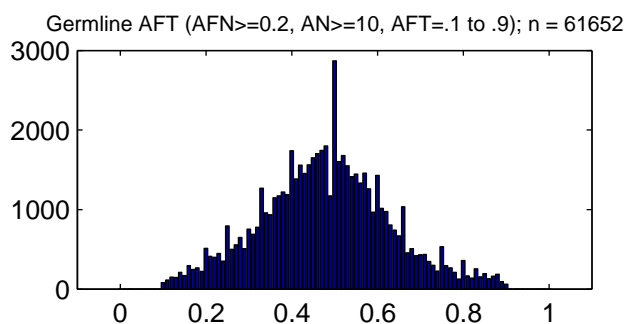



352\_ucsc.edu\_BRCA.IlluminaGA\_DNASeq.Level\_2.11.0.0 -- TCGA-C8-A131\_D

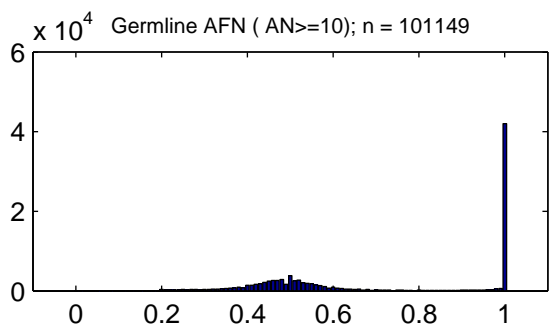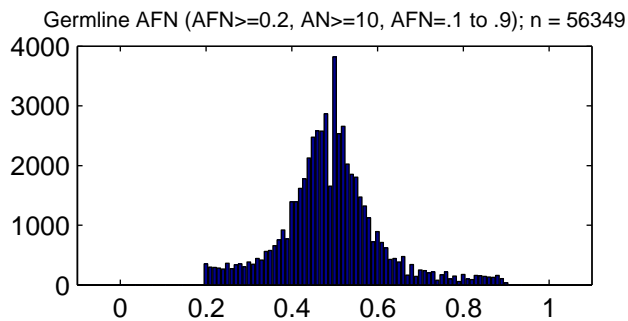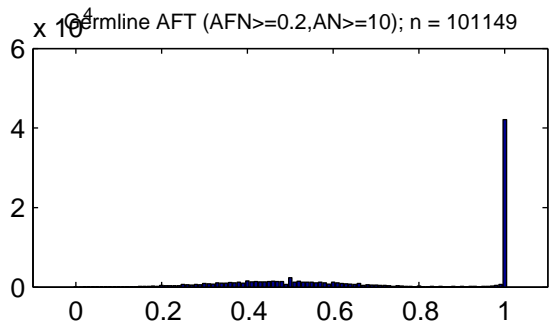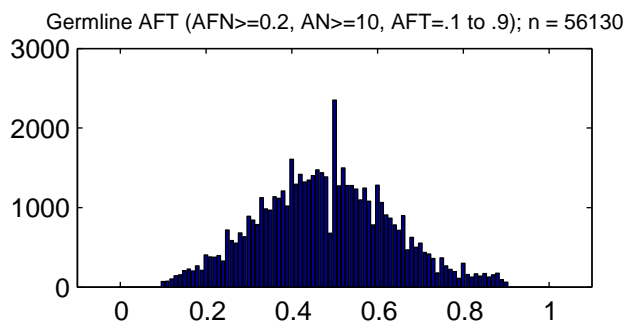

353\_ucsc.edu\_BRCA.IlluminaGA\_DNASeq.Level\_2.2.0.0 -- TCGA-A2-A0EQ\_W

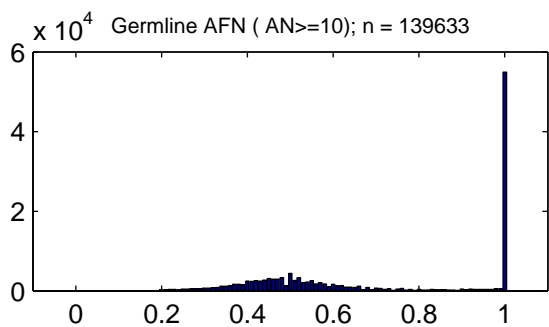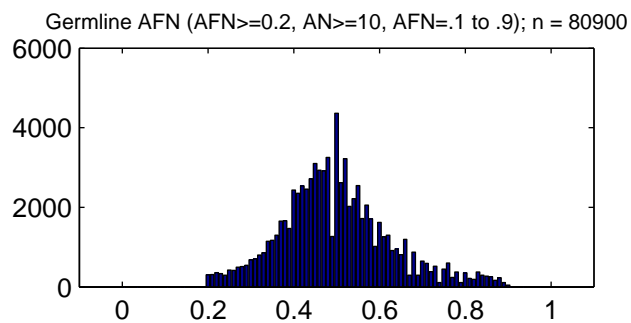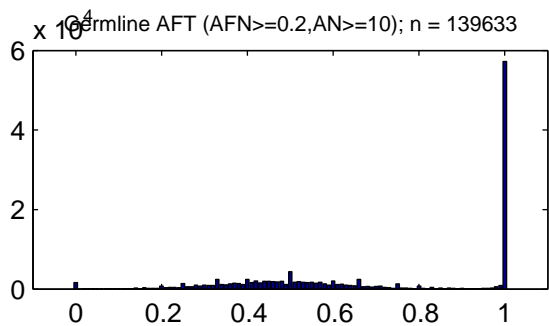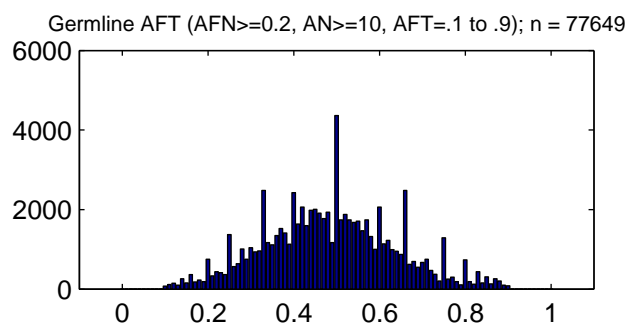

354\_ucsc.edu\_BRCA.IlluminaGA\_DNASeq.Level\_2.10.0.0 -- TCGA-BH-A0C0\_V

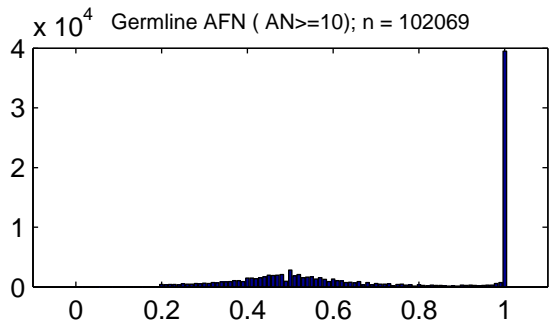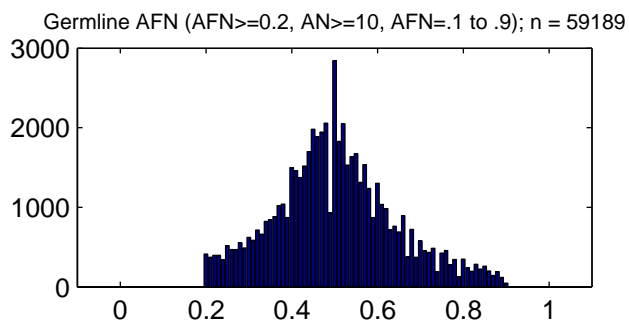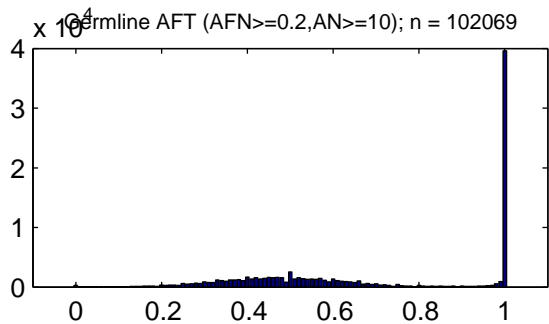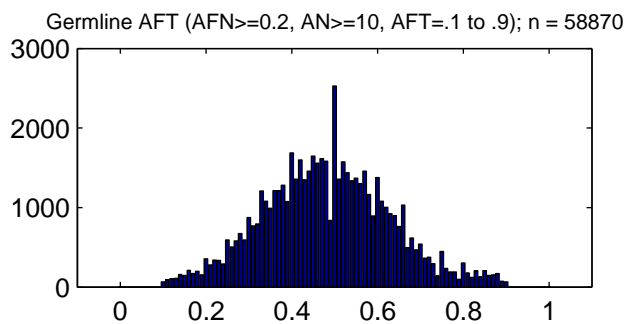

355\_ucsc.edu\_BRCA.IlluminaGA\_DNASeq.Level\_2.12.0.0 -- TCGA-D8-A146\_D

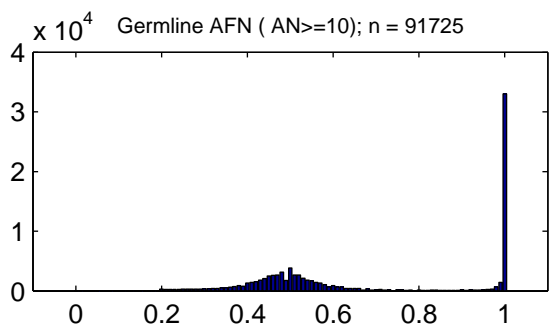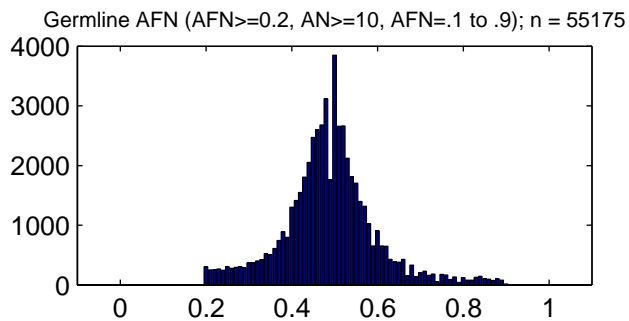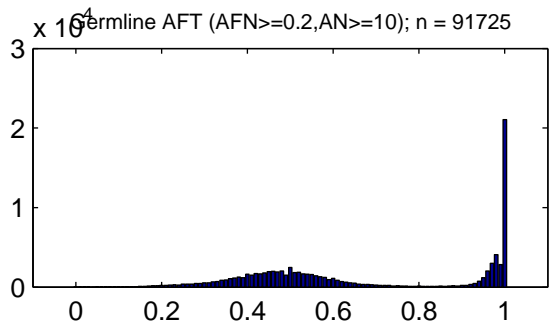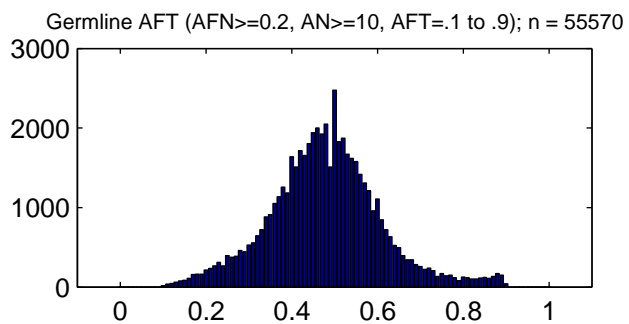

356\_ucsc.edu\_BRCA.IlluminaGA\_DNASeq.Level\_2.9.0.0 -- TCGA-B6-A015\_W

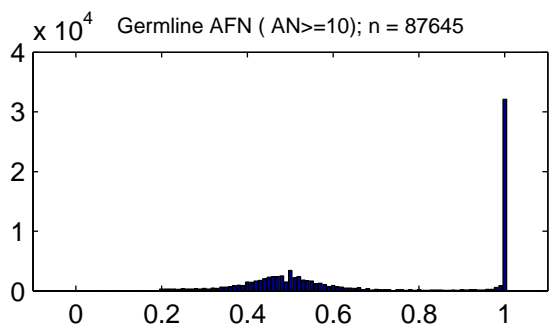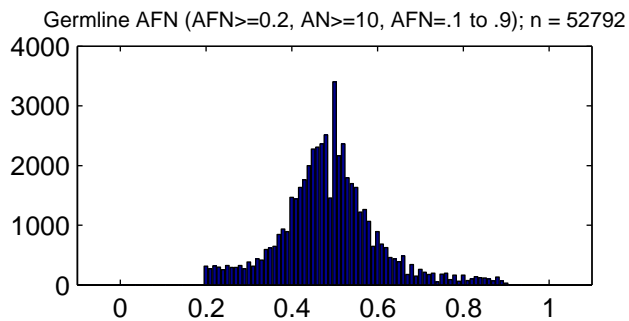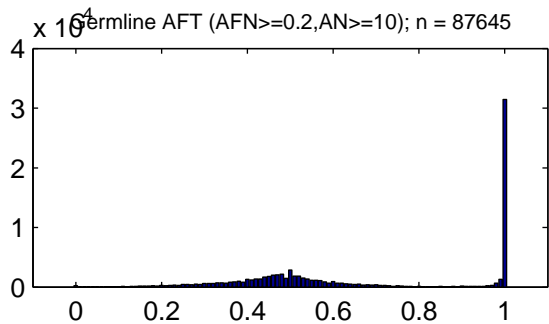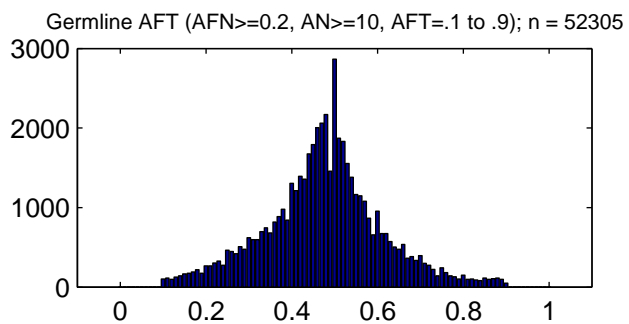

357\_ucsc.edu\_BRCA.IlluminaGA\_DNASeq.Level\_2.14.0.0 -- TCGA-A8-A09V\_V

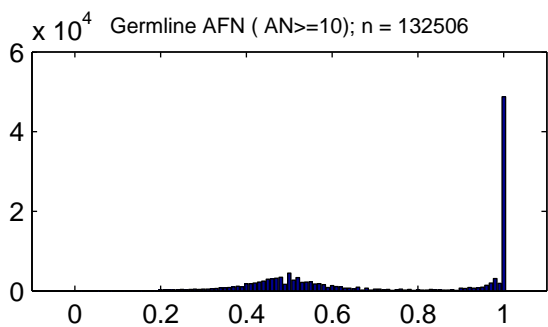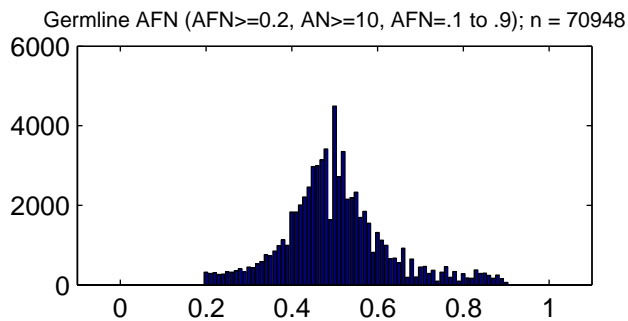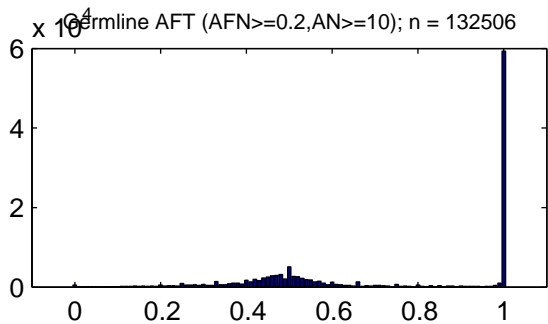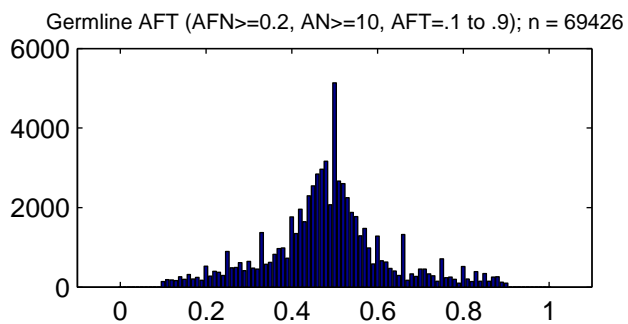

358\_ucsc.edu\_BRCA.IlluminaGA\_DNASeq.Level\_2.10.0.0 -- TCGA-BH-A0BD\_V

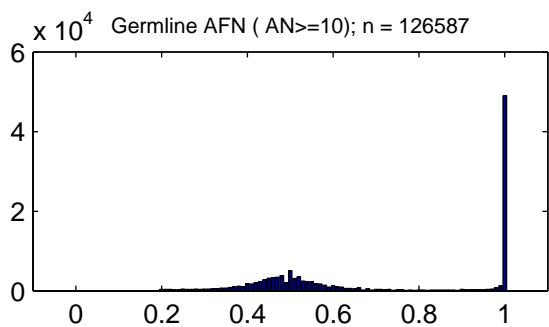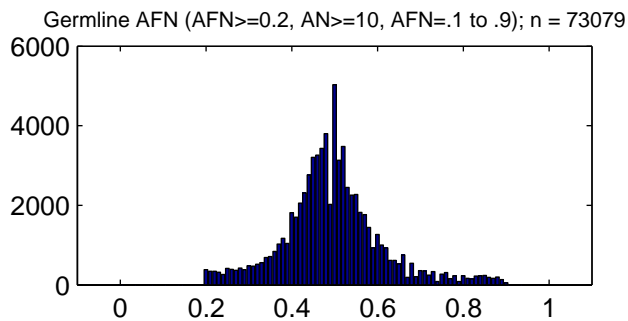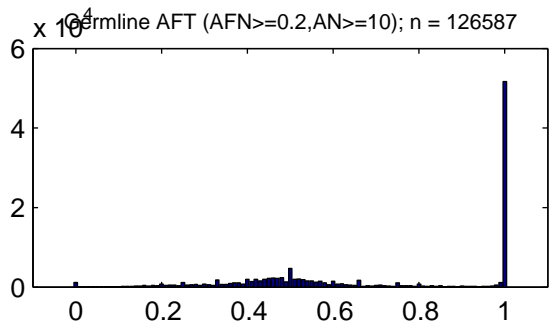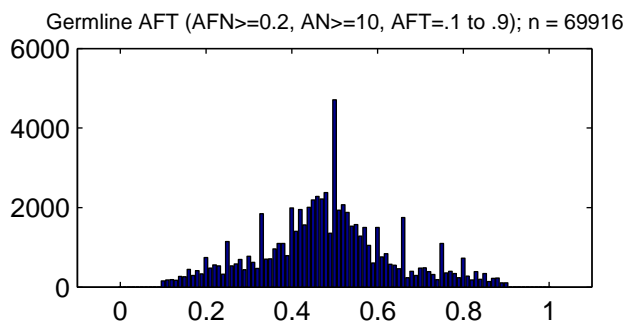

359\_ucsc.edu\_BRCA.IlluminaGA\_DNASeq.Level\_2.4.0.0 -- TCGA-A8-A08X\_W

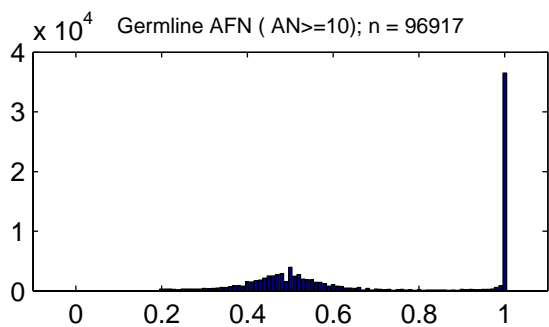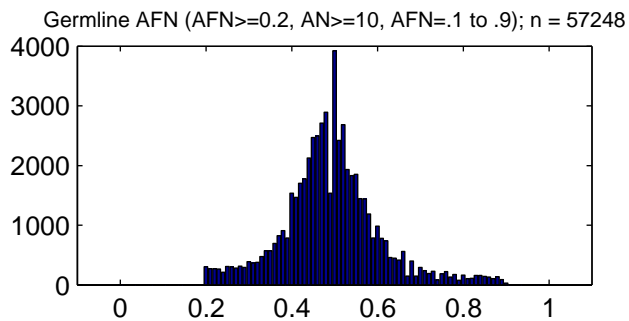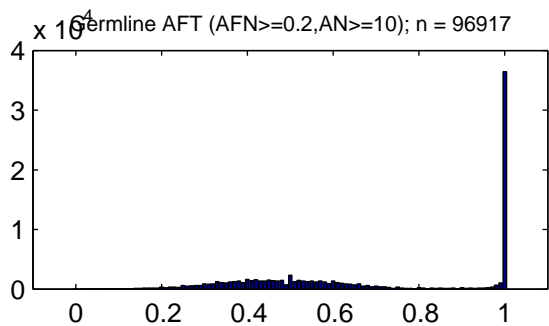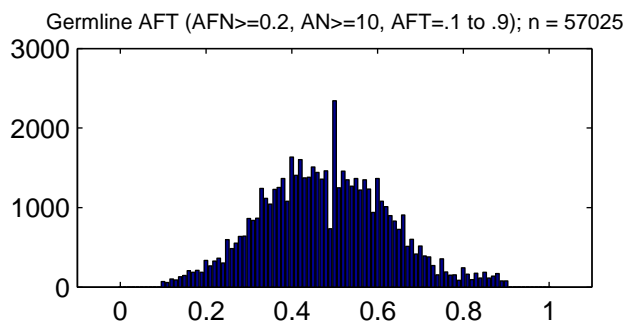



360\_ucsc.edu\_BRCA.IlluminaGA\_DNASeq.Level\_2.10.0.0 -- TCGA-BH-A18R\_C

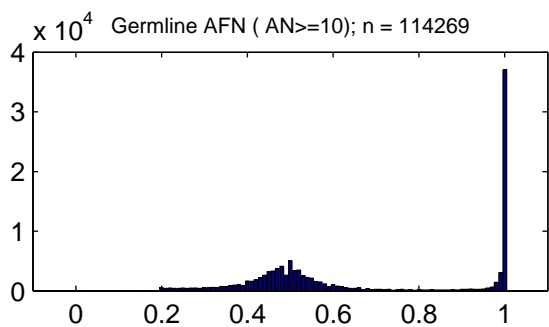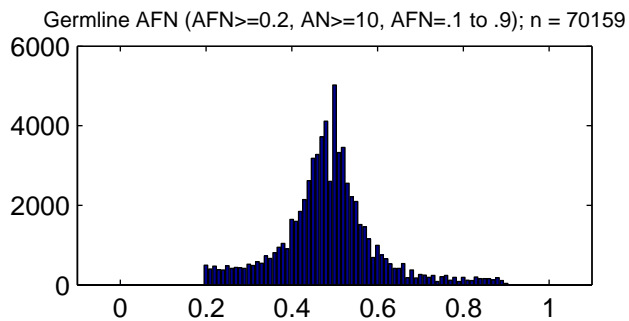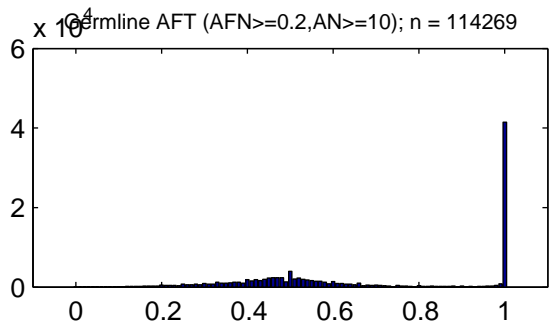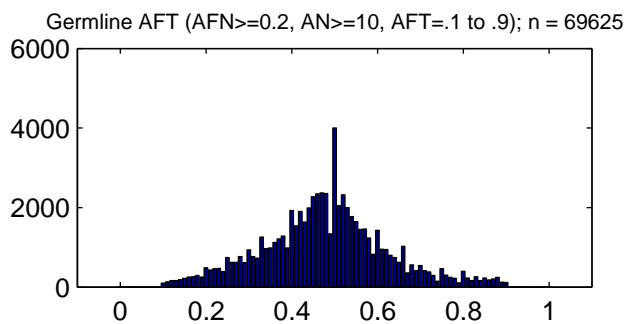

361\_ucsc.edu\_BRCA.IlluminaGA\_DNASeq.Level\_2.13.0.0 --- TCGA-E2-A15O\_C

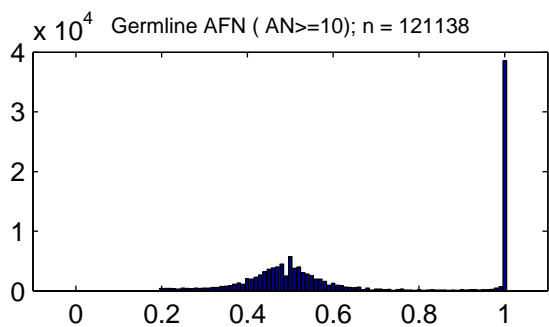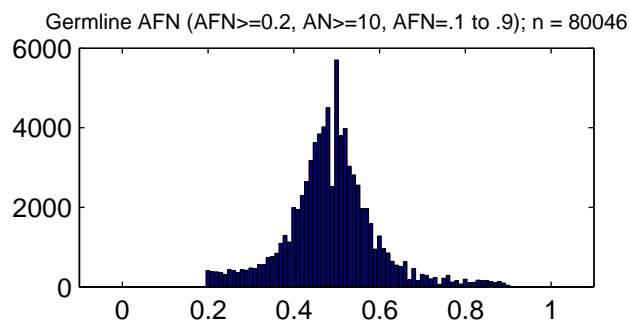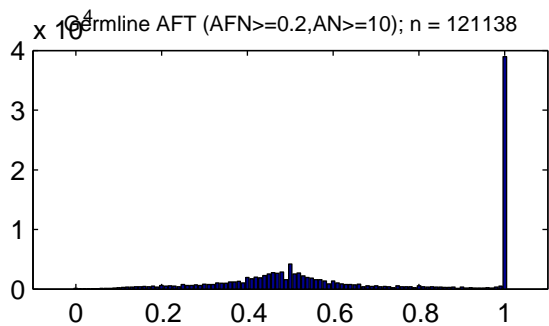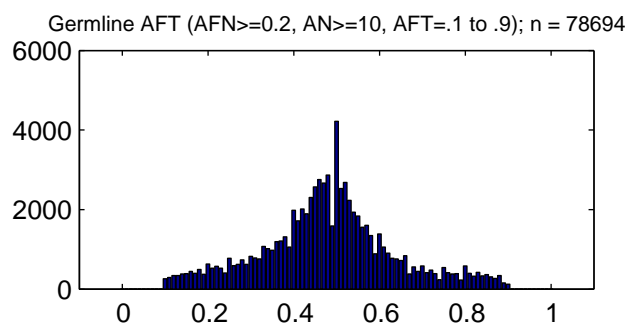

362\_ucsc.edu\_BRCA.IlluminaGA\_DNASeq.Level\_2.7.0.0 -- TCGA-AQ-A04J\_W

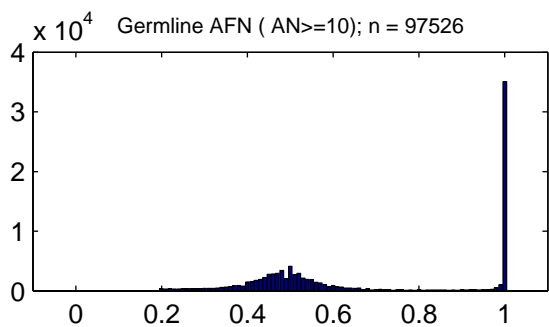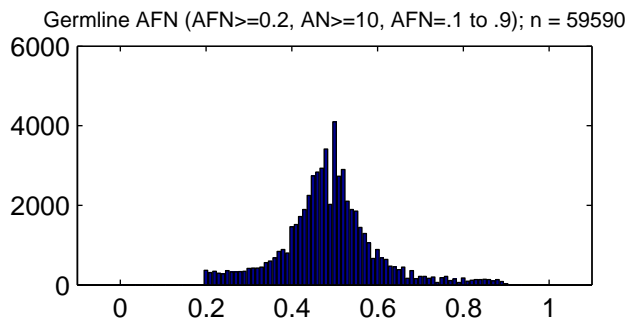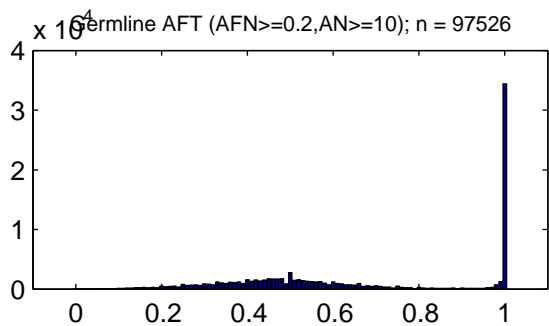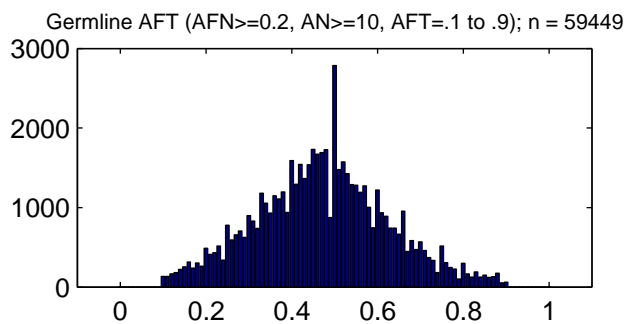

363\_ucsc.edu\_BRCA.IlluminaGA\_DNASeq.Level\_2.13.0.0 -- TCGA-E2-A10E\_C

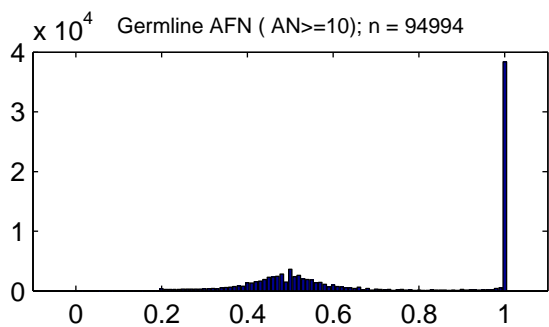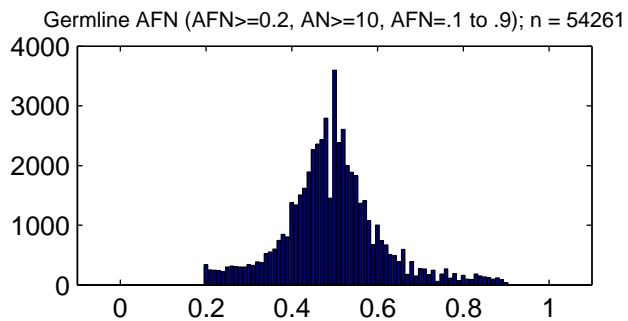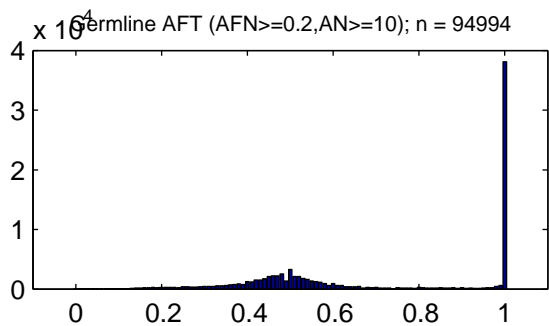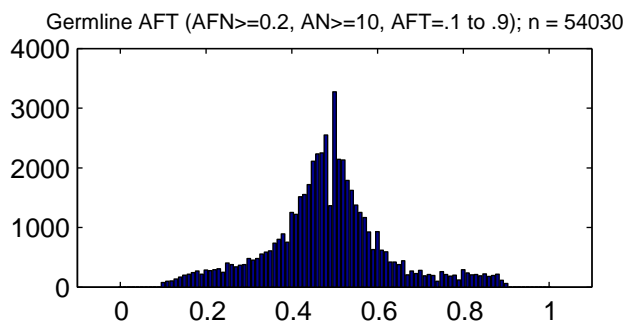

364\_ucsc.edu\_BRCA.IlluminaGA\_DNASeq.Level\_2.2.0.0 -- TCGA-A2-A04W\_D

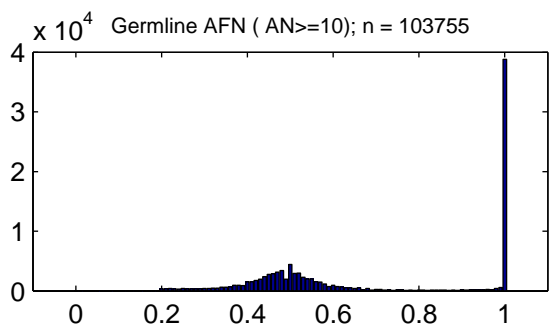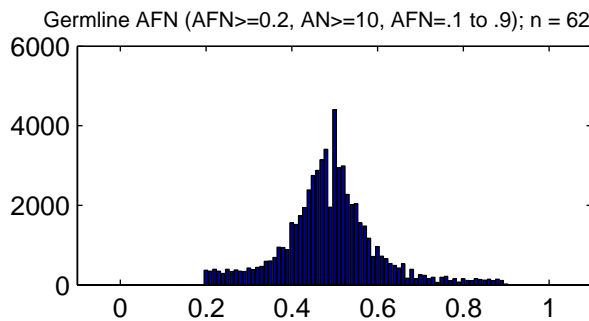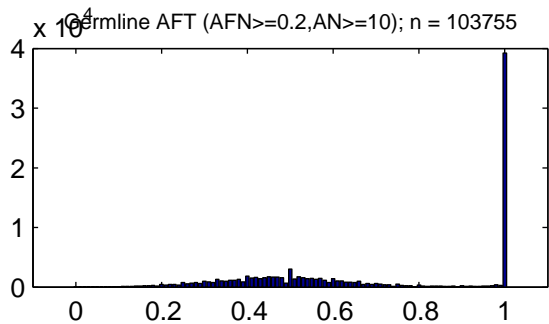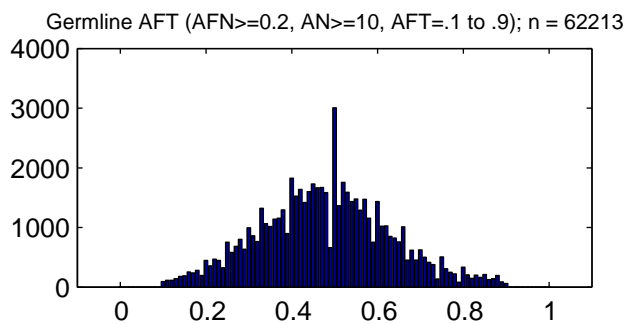

365\_ucsc.edu\_BRCA.IlluminaGA\_DNASeq.Level\_2.9.0.0 -- TCGA-B6-A0IE\_W

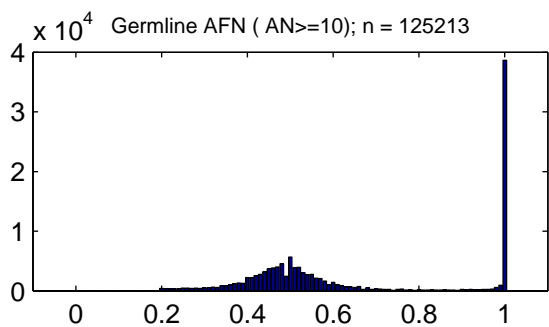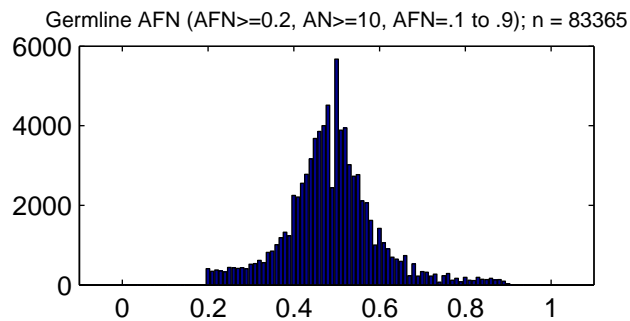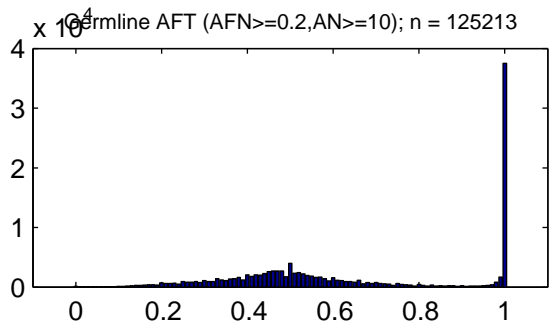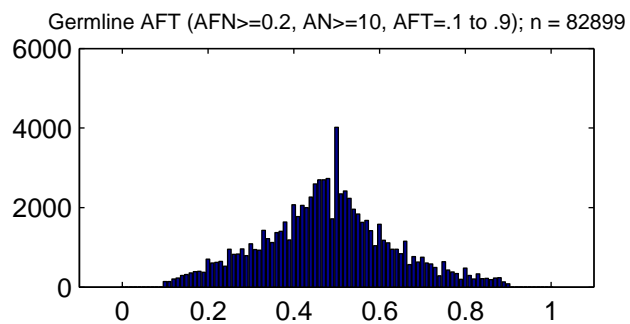

366\_ucsc.edu\_BRCA.IlluminaGA\_DNASeq.Level\_2.11.0.0 -- TCGA-C8-A135\_D

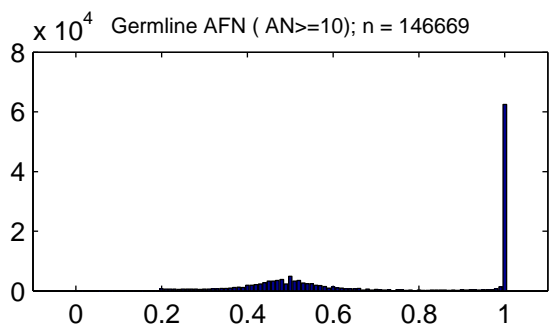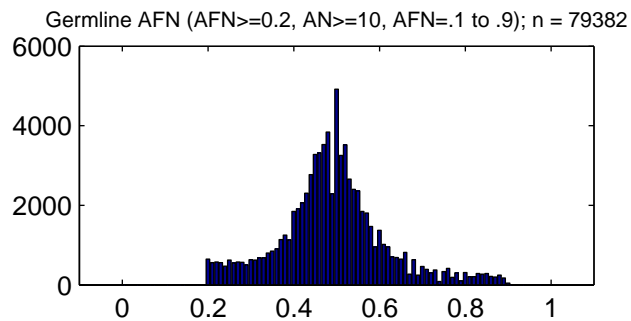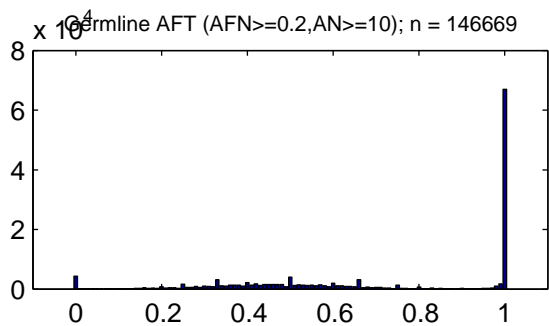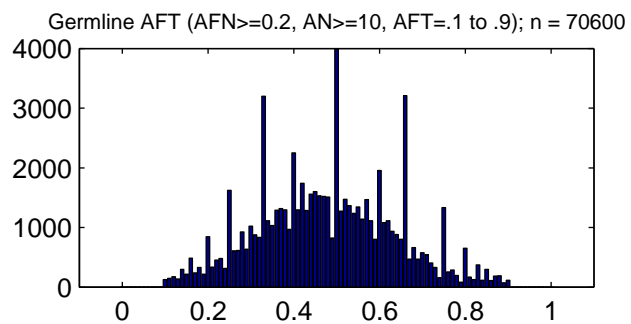

367\_ucsc.edu\_BRCA.IlluminaGA\_DNASeq.Level\_2.4.0.0 -- TCGA-A8-A0A7\_W

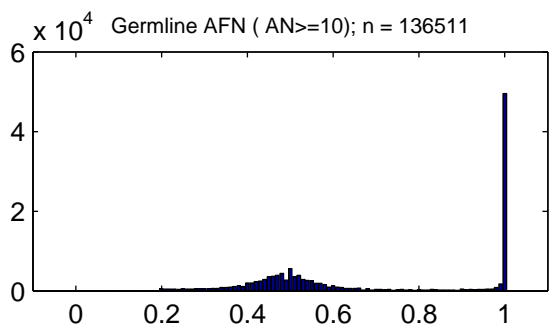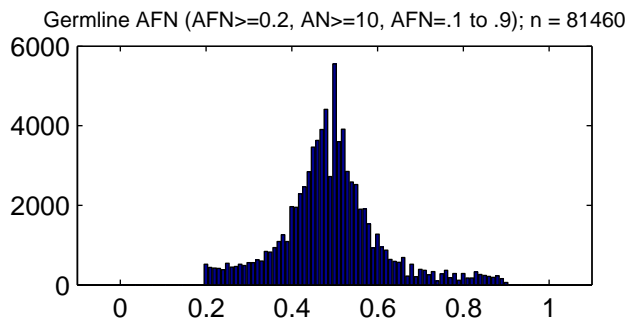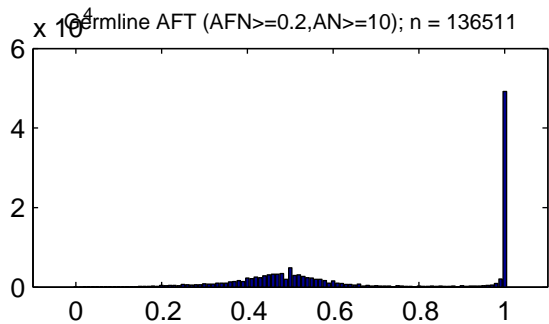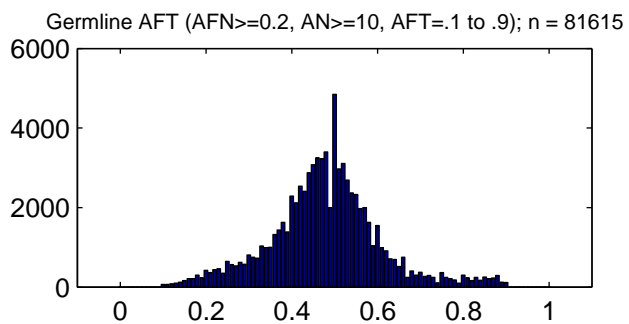



368\_ucsc.edu\_BRCA.IlluminaGA\_DNASeq.Level\_2.5.0.0 -- TCGA-AN-A0FS\_W

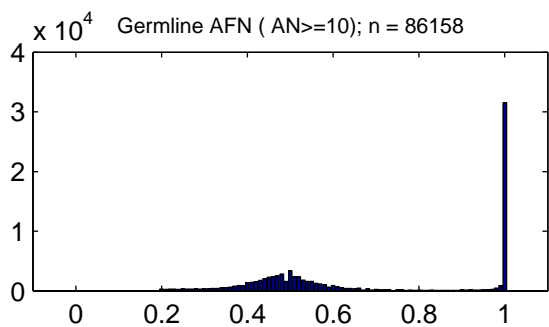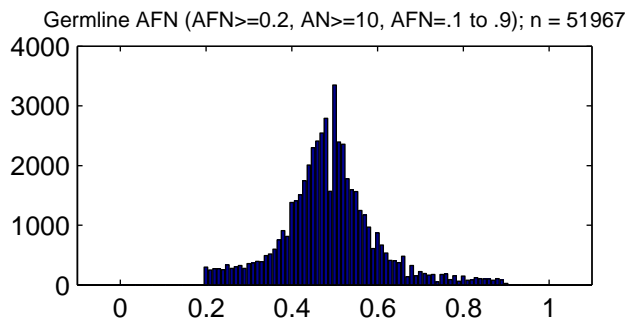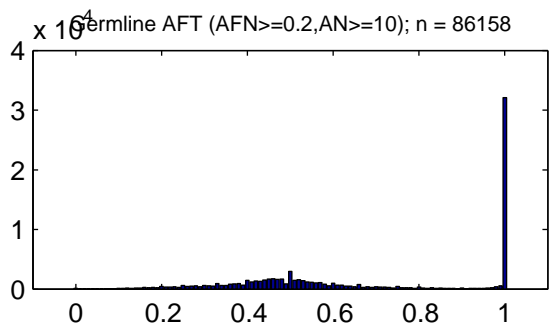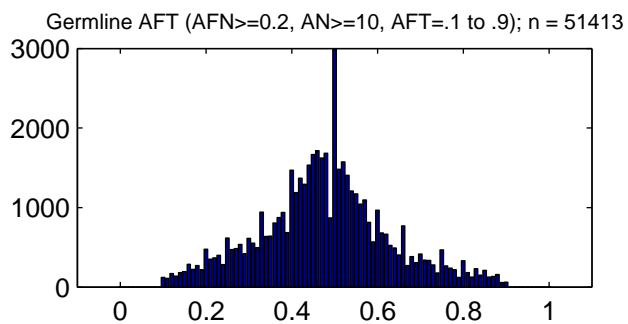

369\_ucsc.edu\_BRCA.IlluminaGA\_DNASeq.Level\_2.6.0.0 -- TCGA-AO-A03U\_D

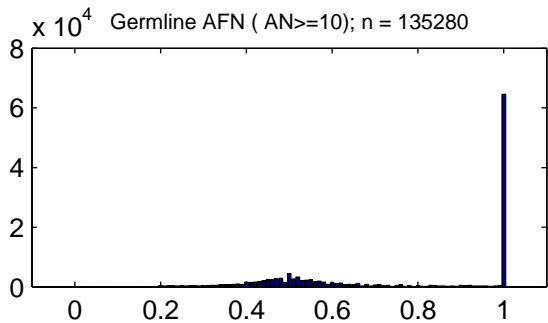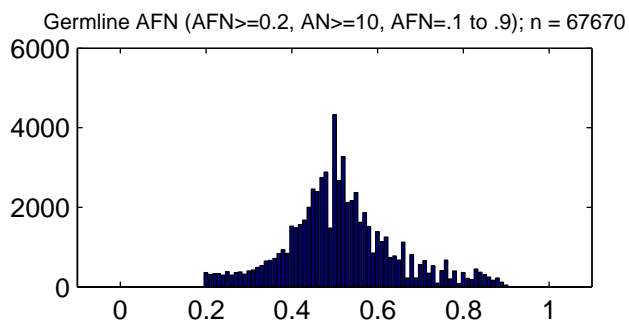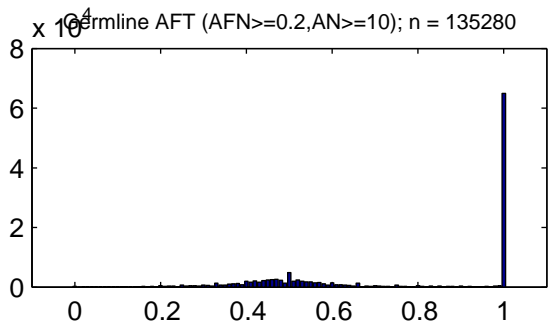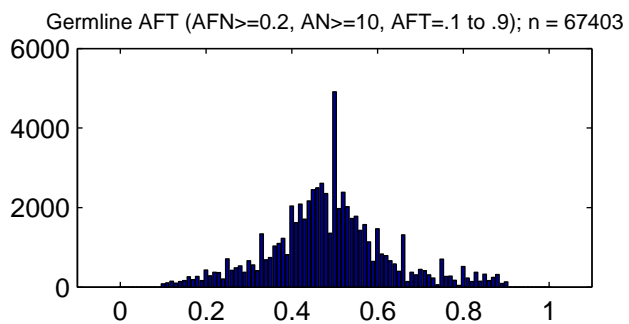

370\_ucsc.edu\_BRCA.IlluminaGA\_DNASeq.Level\_2.10.0.0 -- TCGA-BH-A0BC\_I

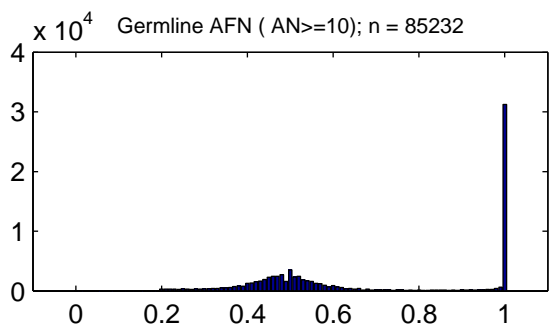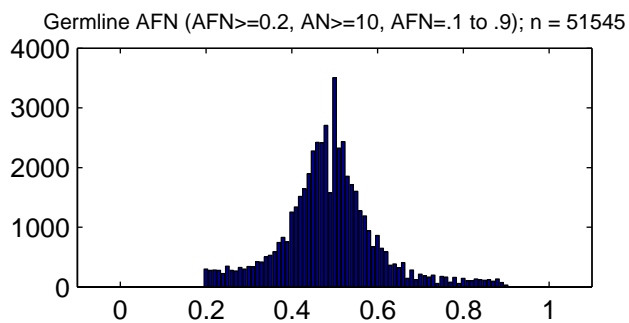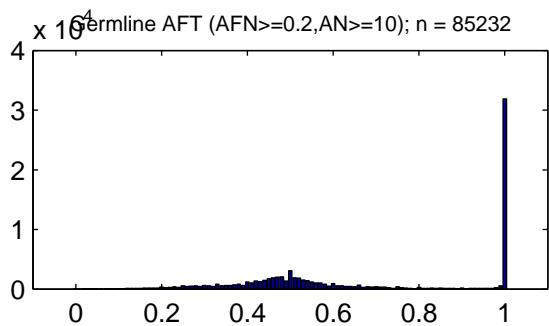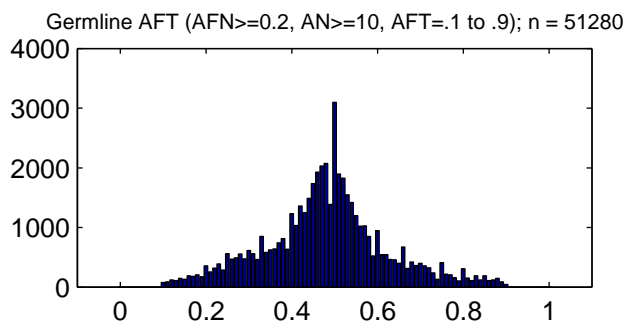

371\_ucsc.edu\_BRCA.IlluminaGA\_DNASeq.Level\_2.11.0.0 -- TCGA-C8-A12T\_D

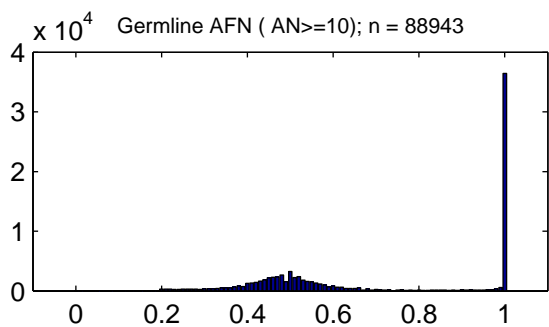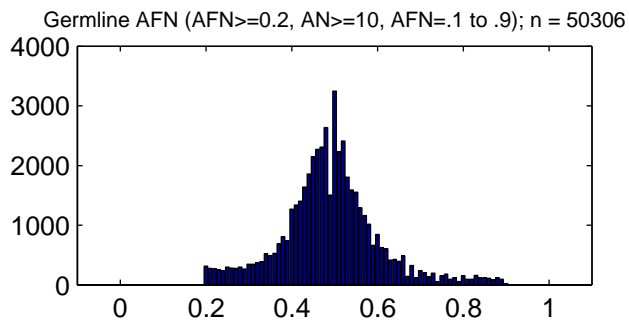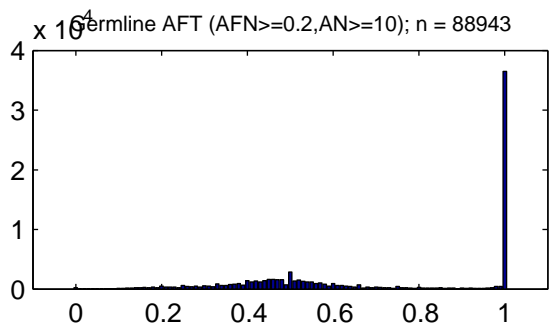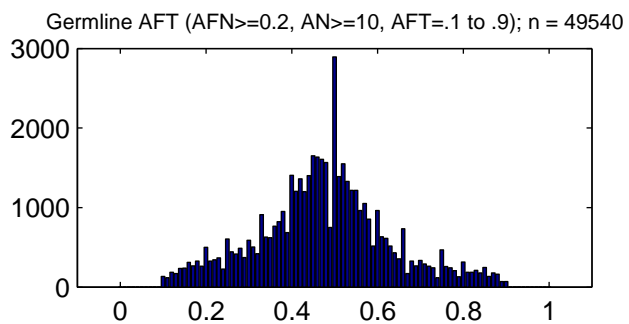

372\_ucsc.edu\_BRCA.IlluminaGA\_DNASeq.Level\_2.4.0.0 -- TCGA-A8-A07G\_W

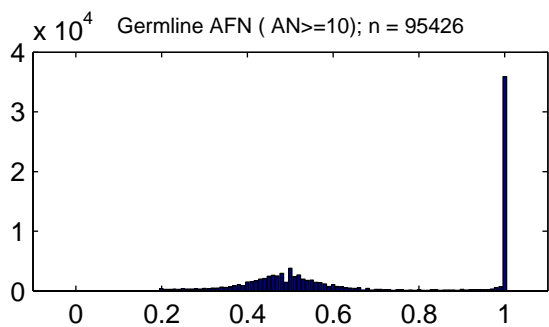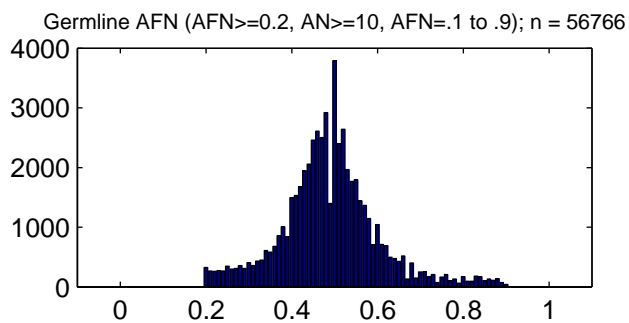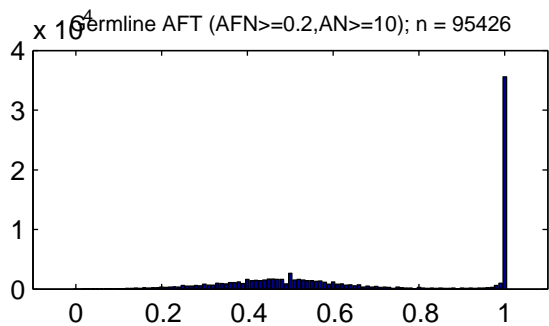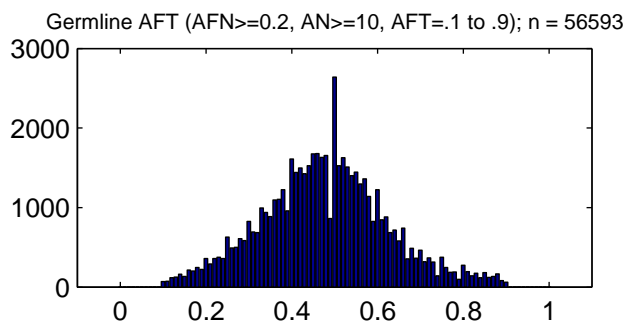

373\_ucsc.edu\_BRCA.IlluminaGA\_DNASeq.Level\_2.4.0.0 -- TCGA-A8-A09Z\_W

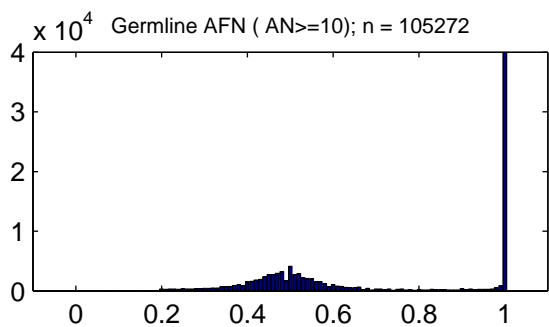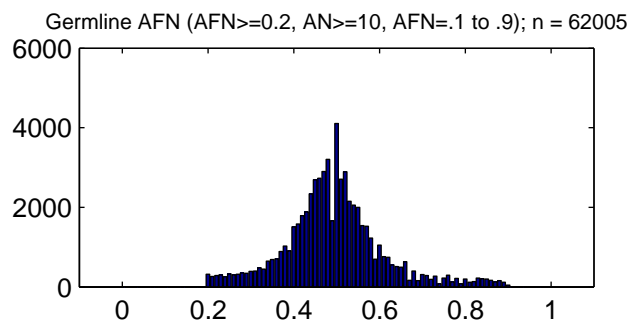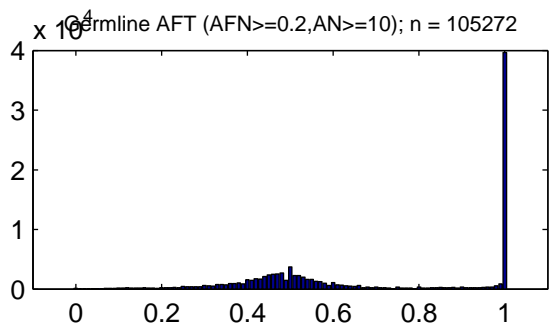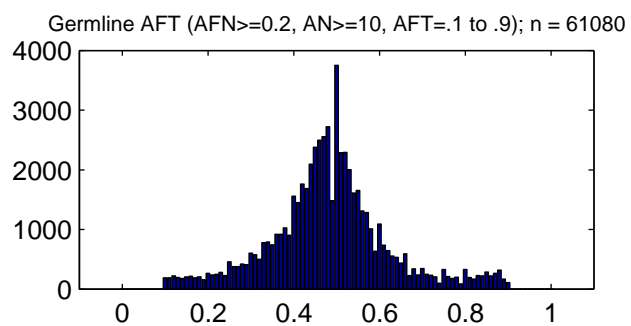

374\_ucsc.edu\_BRCA.IlluminaGA\_DNASeq.Level\_2.9.0.0 -- TCGA-B6-A0X5\_D

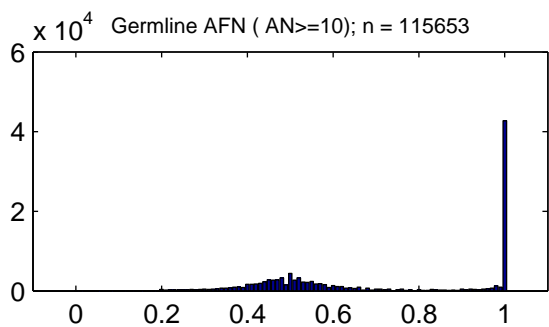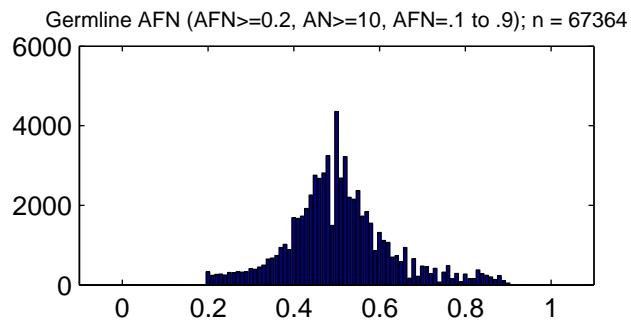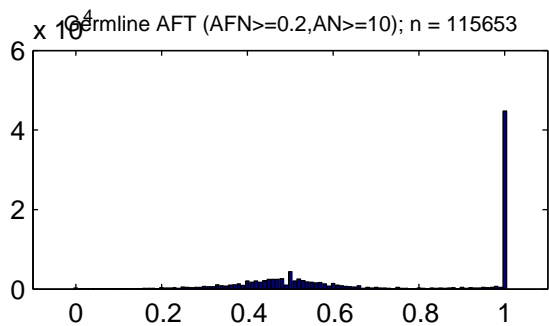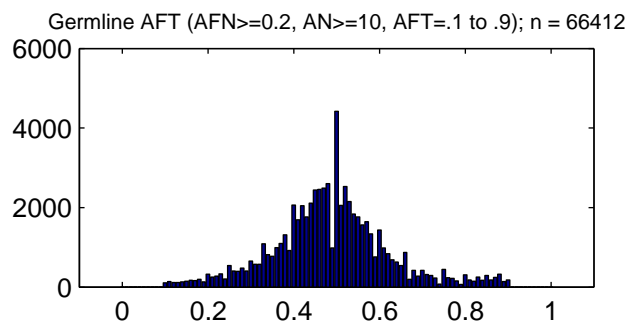

375\_ucsc.edu\_BRCA.IlluminaGA\_DNASeq.Level\_2.4.0.0 -- TCGA-A8-A08Z\_W

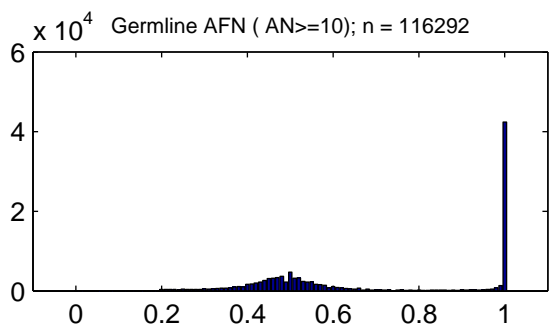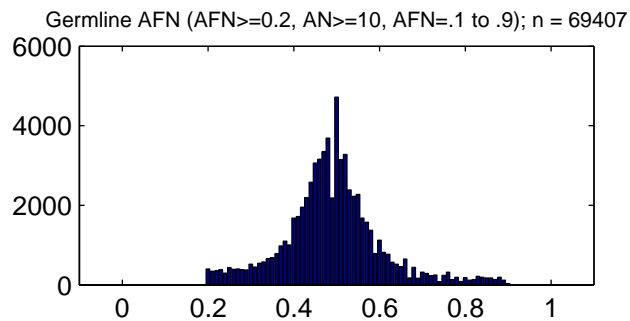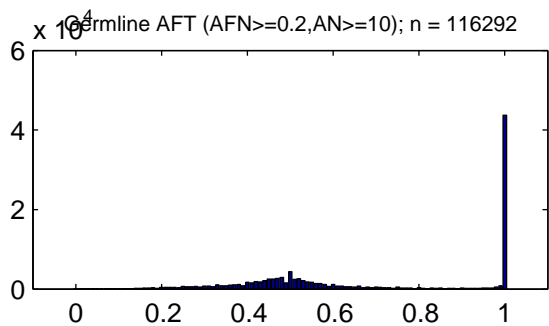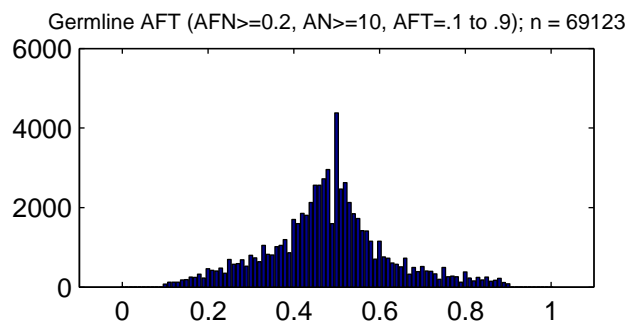



376\_ucsc.edu\_BRCA.IlluminaGA\_DNASeq.Level\_2.3.0.0 -- TCGA-A7-A0CG\_W

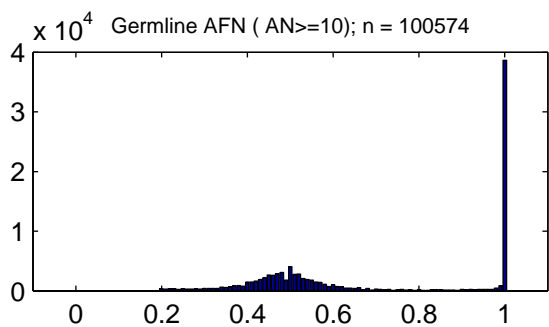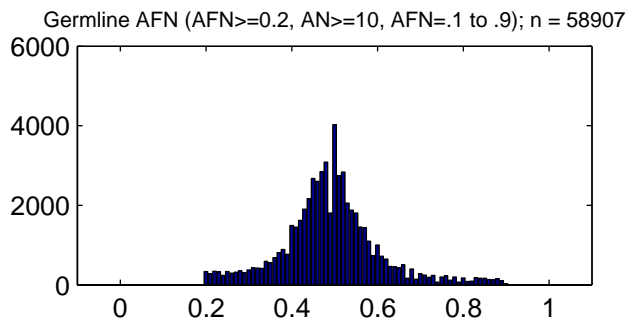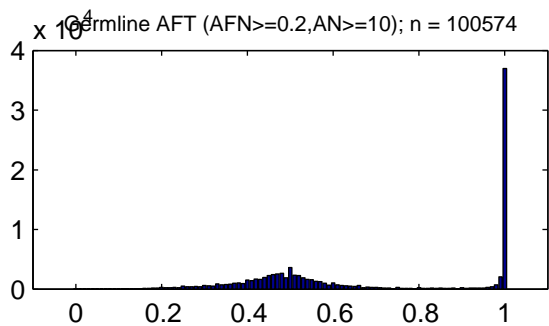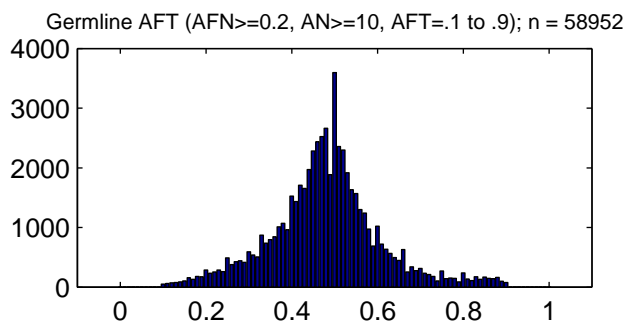

377\_ucsc.edu\_BRCA.IlluminaGA\_DNASeq.Level\_2.13.0.0 -- TCGA-E2-A14N\_C

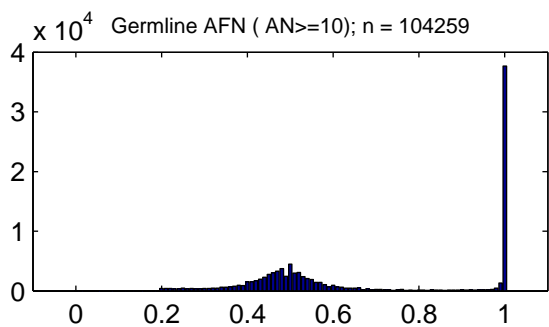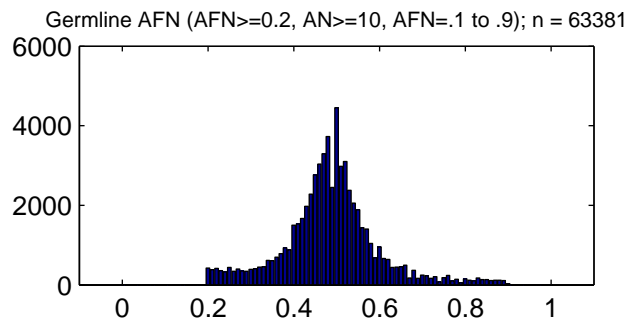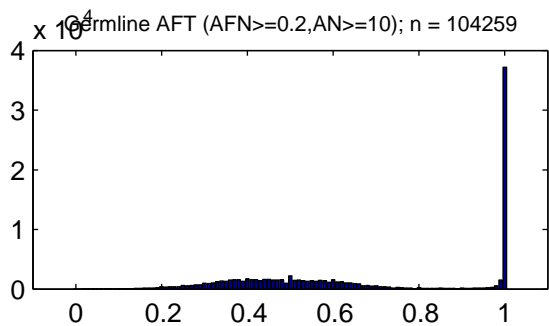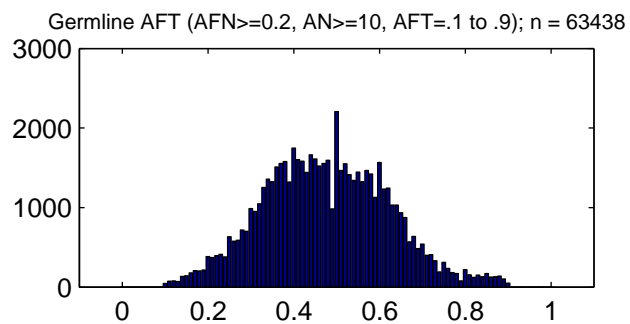

378\_ucsc.edu\_BRCA.IlluminaGA\_DNASeq.Level\_2.4.0.0 -- TCGA-A8-A07U\_W

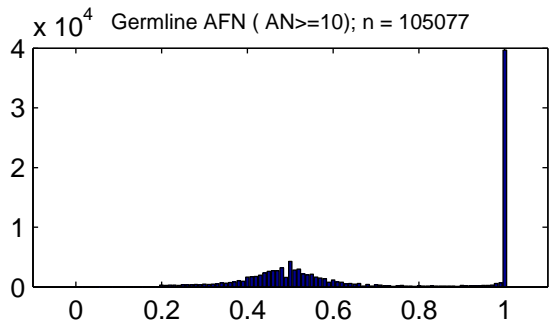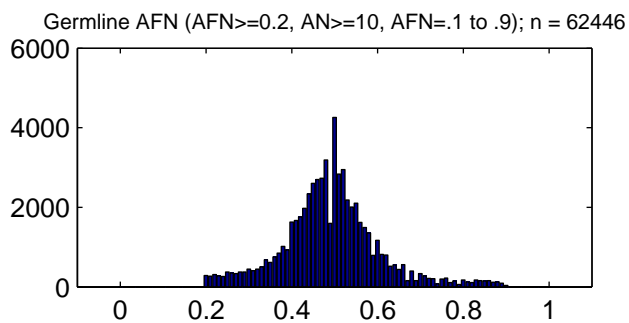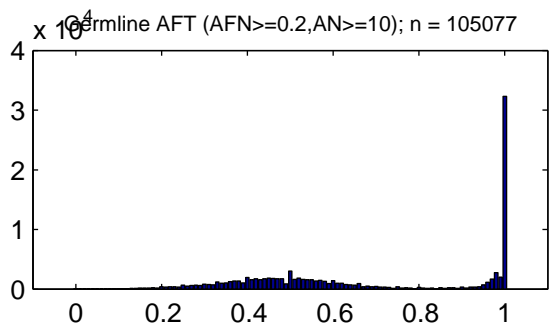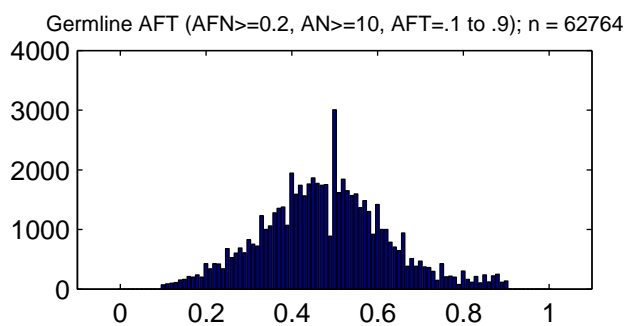

379\_ucsc.edu\_BRCA.IlluminaGA\_DNASeq.Level\_2.4.0.0 -- TCGA-A8-A0A1\_W

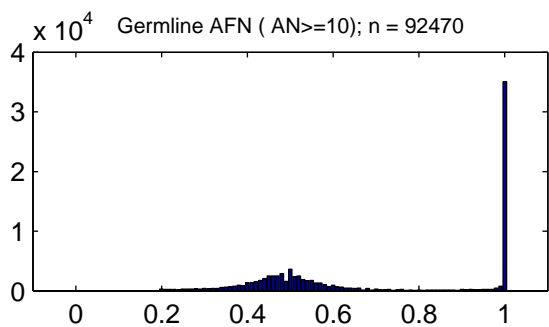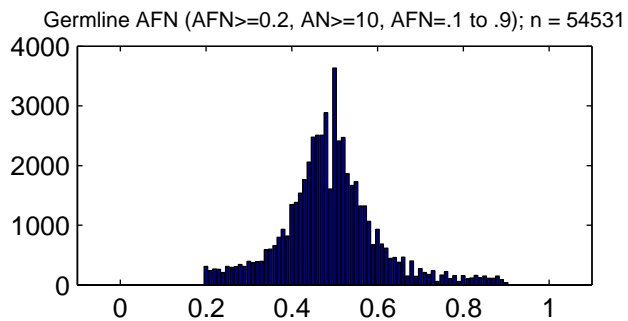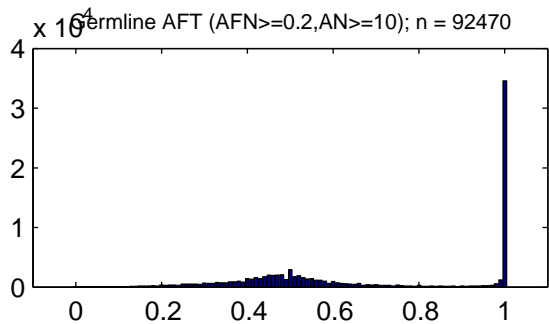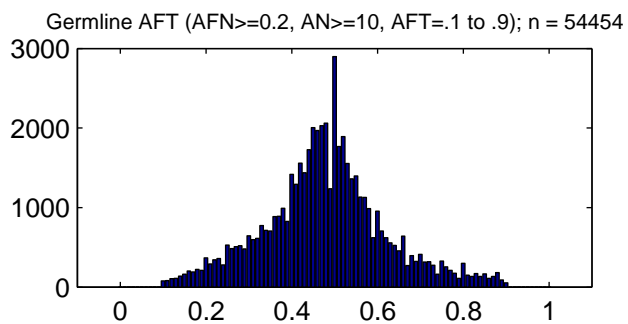

380\_ucsc.edu\_BRCA.IlluminaGA\_DNASeq.Level\_2.5.0.0 -- TCGA-AN-A0XO\_D

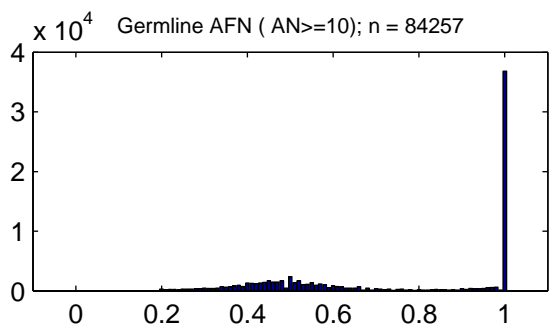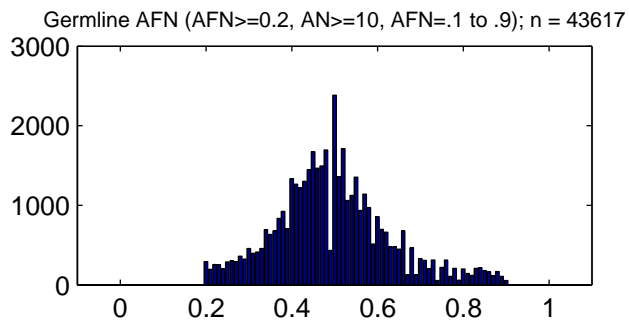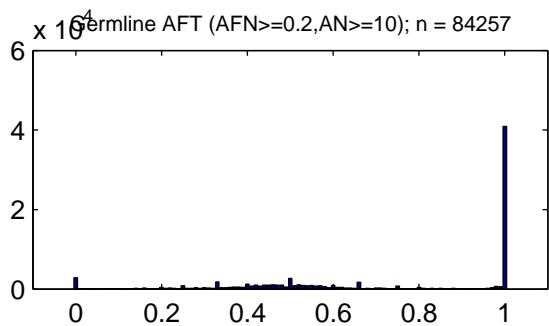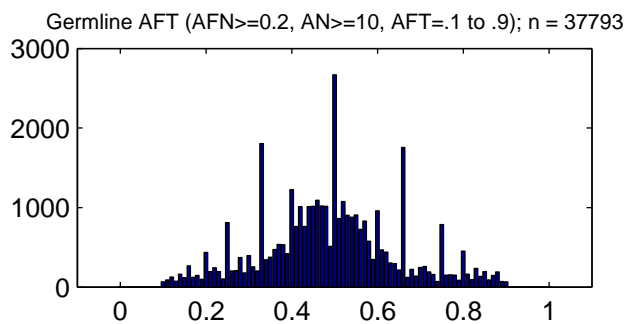

381\_ucsc.edu\_BRCA.IlluminaGA\_DNASeq.Level\_2.6.0.0 -- TCGA-AO-A126\_D

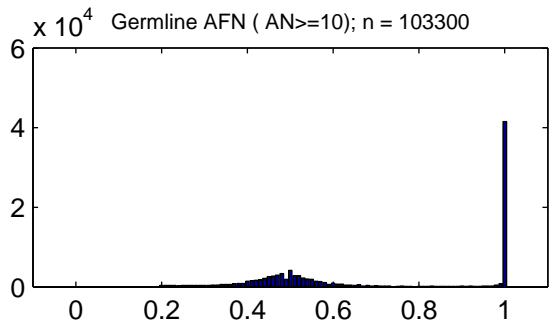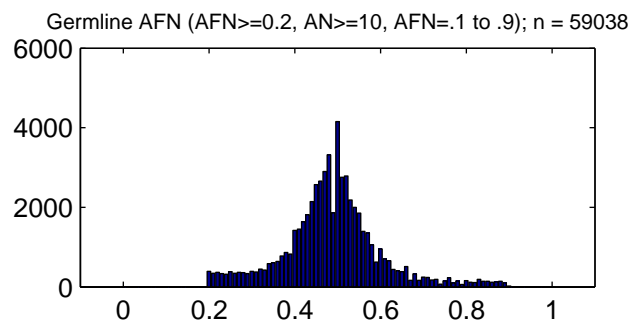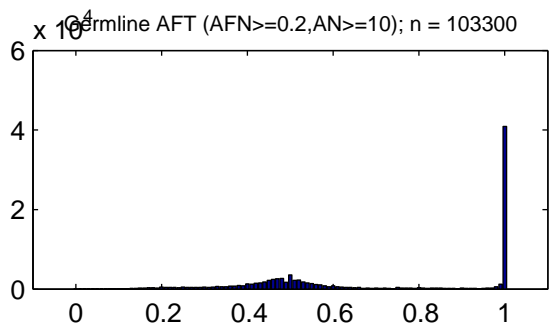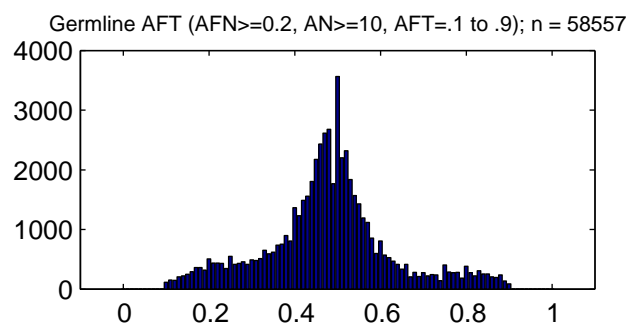

382\_ucsc.edu\_BRCA.IlluminaGA\_DNASeq.Level\_2.10.0.0 -- TCGA-BH-A0BM\_V

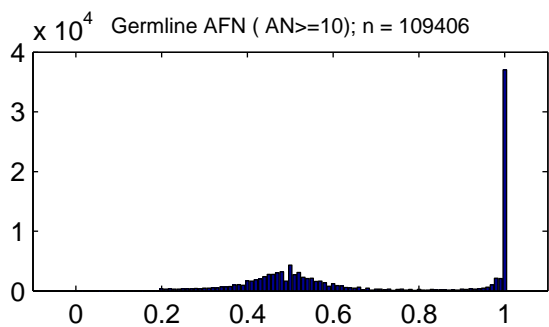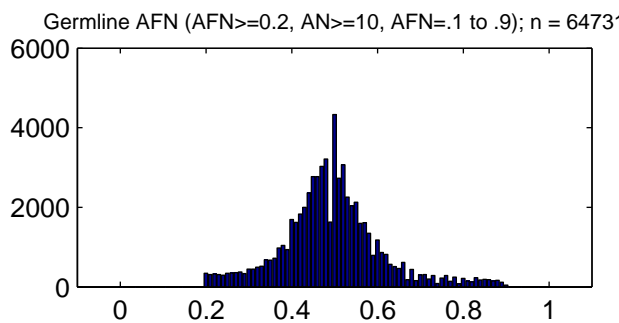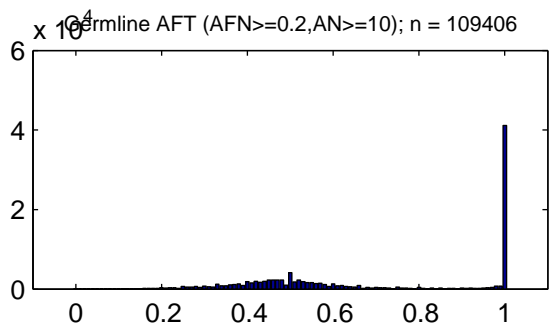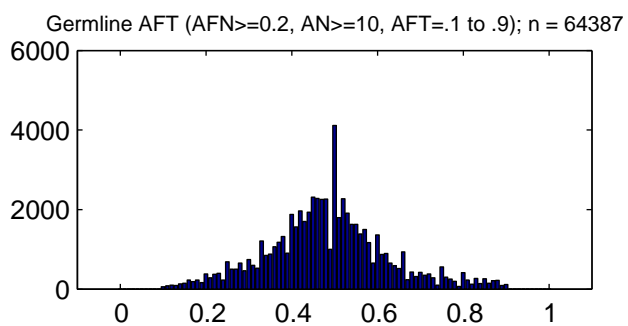

383\_ucsc.edu\_BRCA.IlluminaGA\_DNASeq.Level\_2.9.0.0 -- TCGA-B6-A0WY\_D

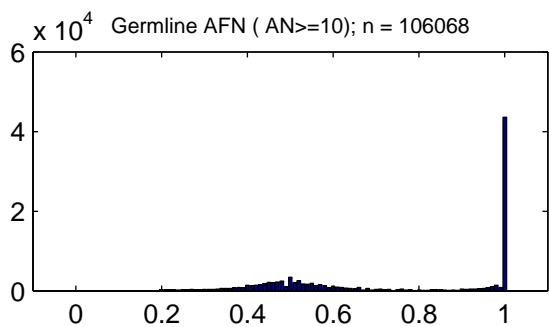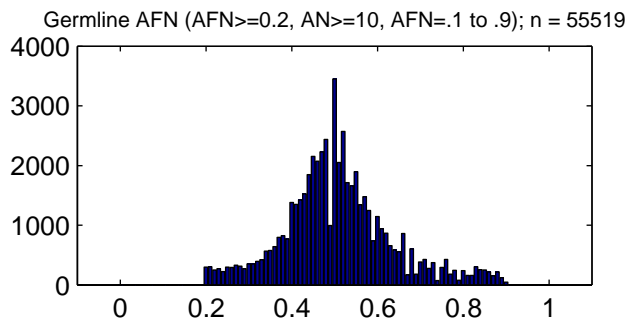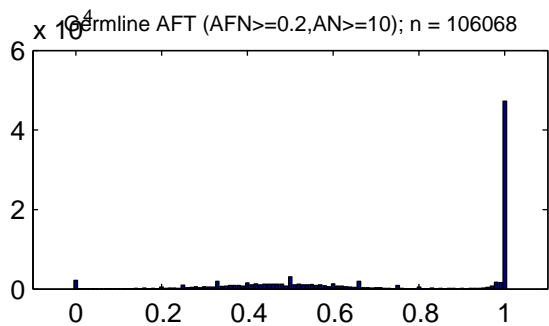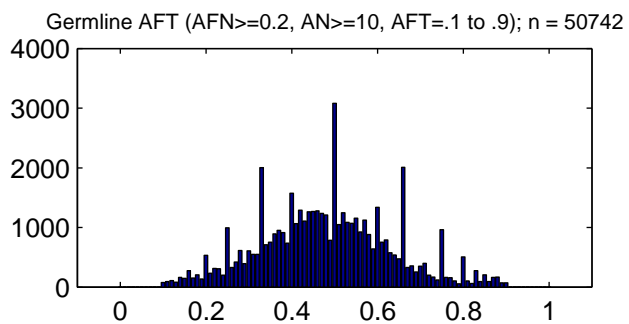



384\_ucsc.edu\_BRCA.IlluminaGA\_DNASeq.Level\_2.3.0.0 -- TCGA-A7-A0CH\_W

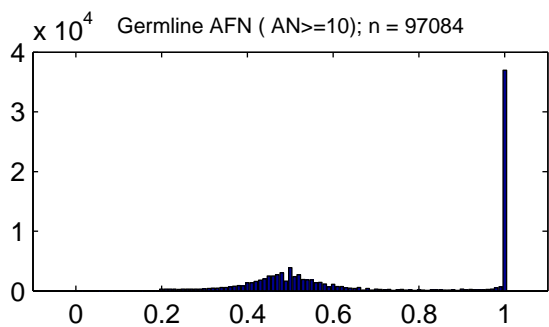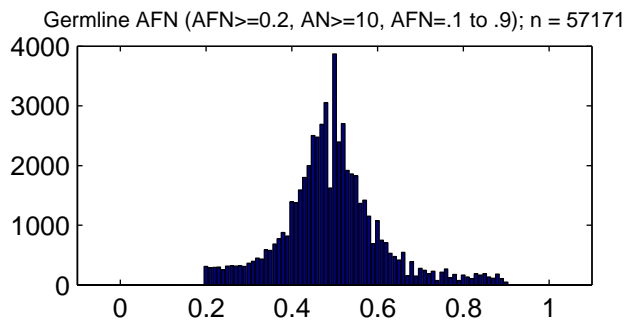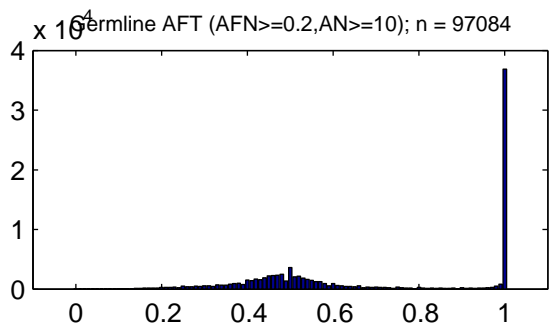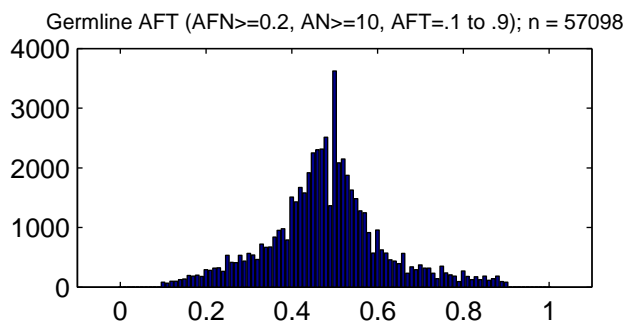

385\_ucsc.edu\_BRCA.IlluminaGA\_DNASeq.Level\_2.10.0.0 -- TCGA-BH-A18M\_I

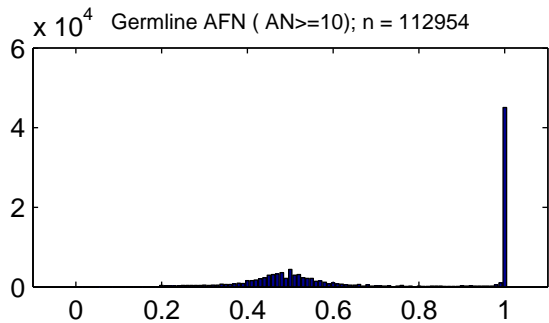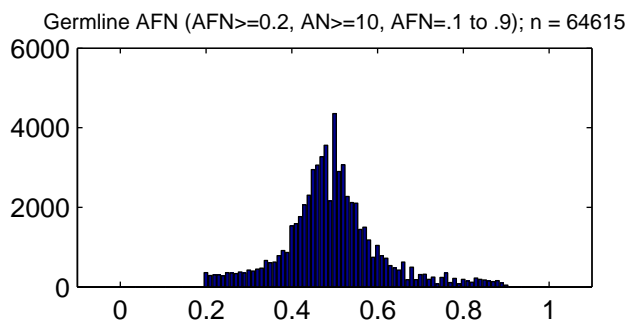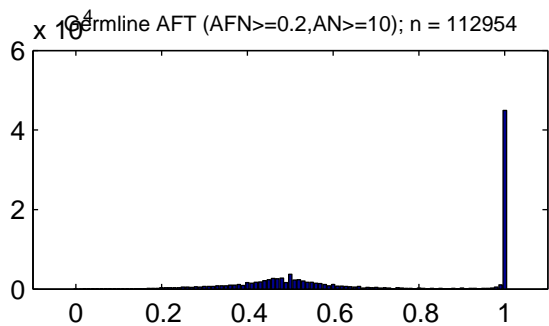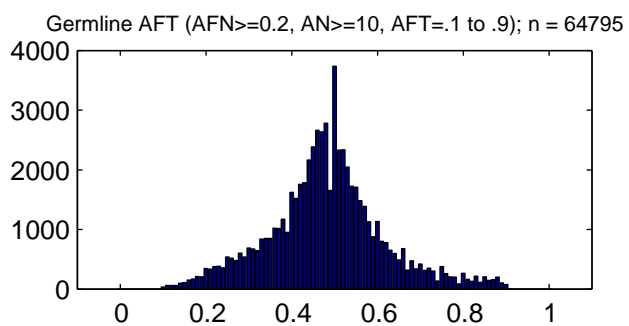

386\_ucsc.edu\_BRCA.IlluminaGA\_DNASeq.Level\_2.4.0.0 -- TCGA-A8-A0A6\_W

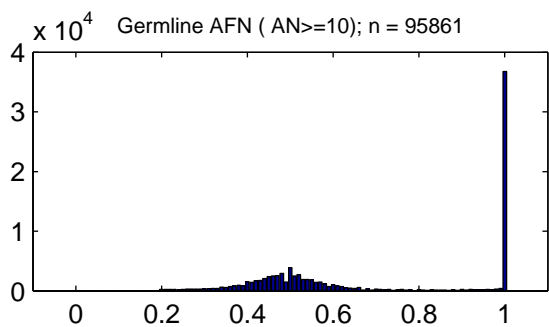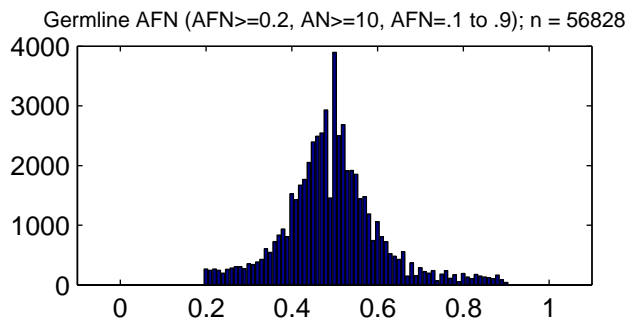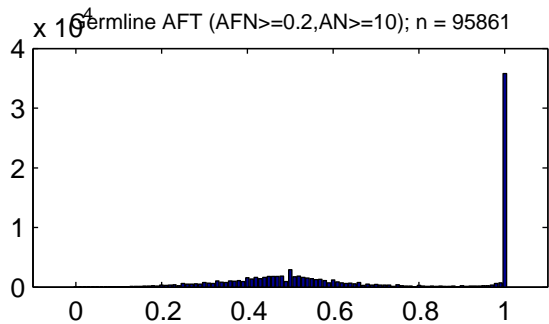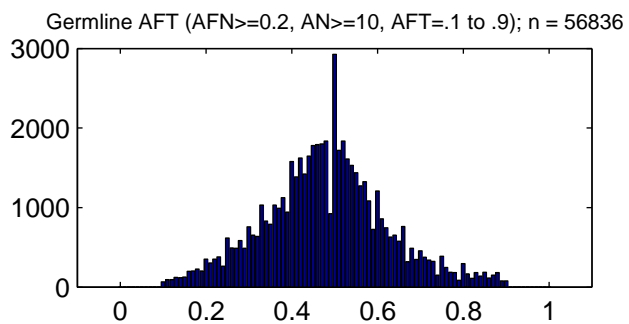

387\_ucsc.edu\_BRCA.IlluminaGA\_DNASeq.Level\_2.12.0.0 -- TCGA-D8-A140\_D

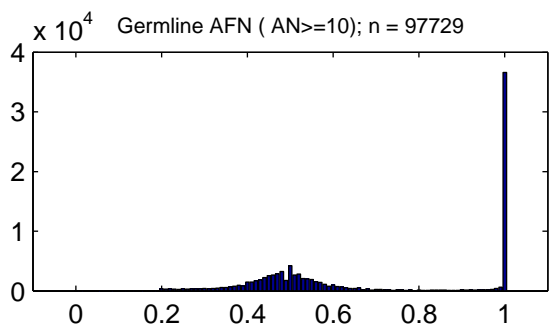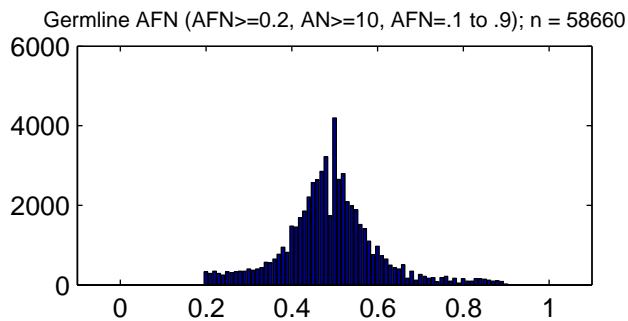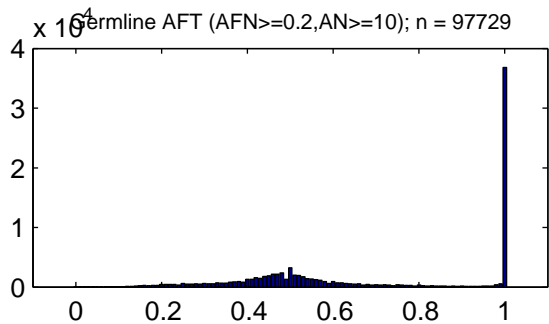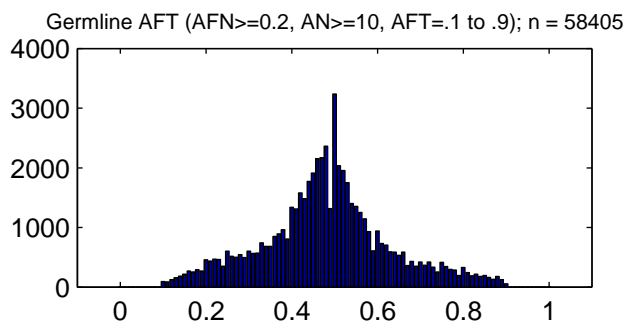

388\_ucsc.edu\_BRCA.IlluminaGA\_DNASeq.Level\_2.8.0.0 -- TCGA-AR-A1AU\_D

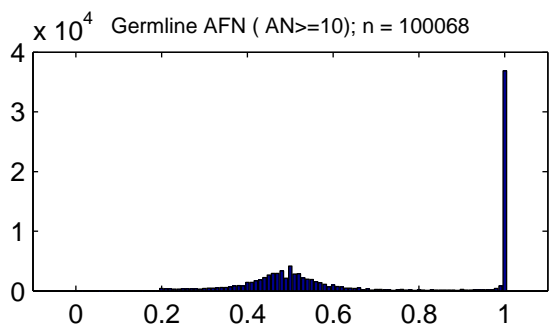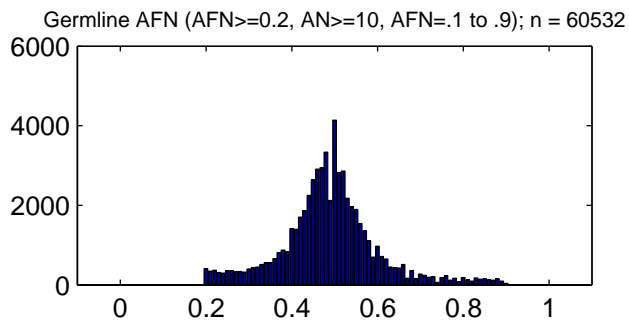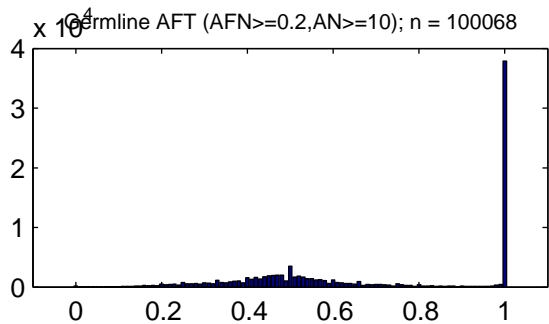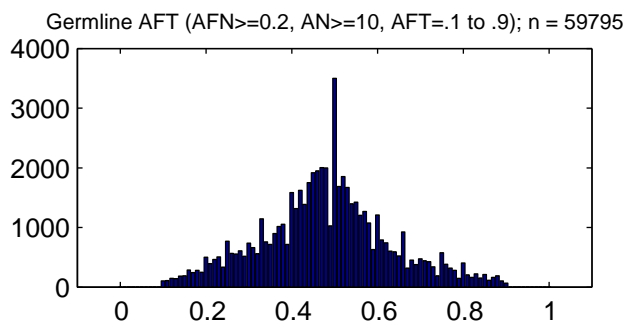

389\_ucsc.edu\_BRCA.IlluminaGA\_DNASeq.Level\_2.8.0.0 -- TCGA-AR-A1AK\_D

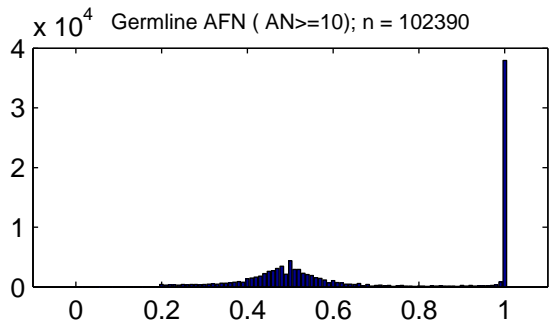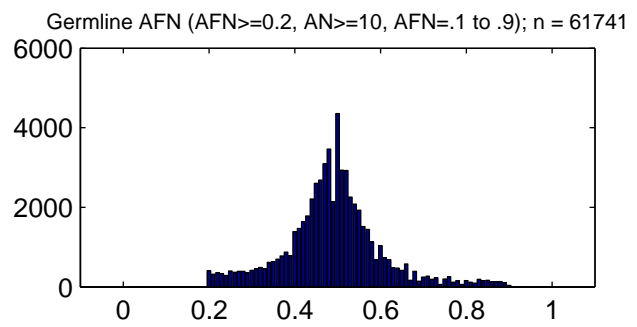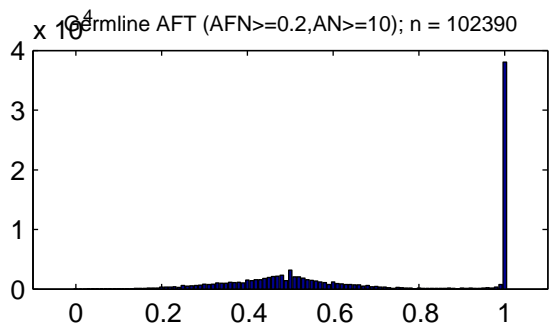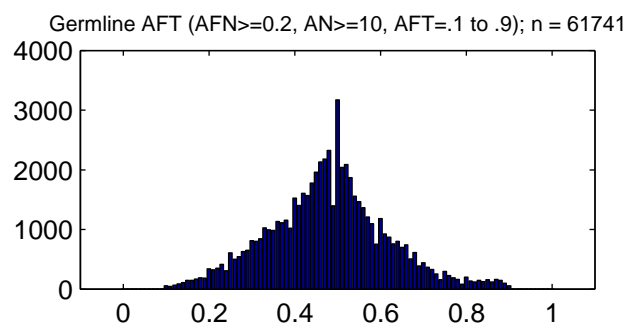

390\_ucsc.edu\_BRCA.IlluminaGA\_DNASeq.Level\_2.2.0.0 -- TCGA-A2-A0T1\_D

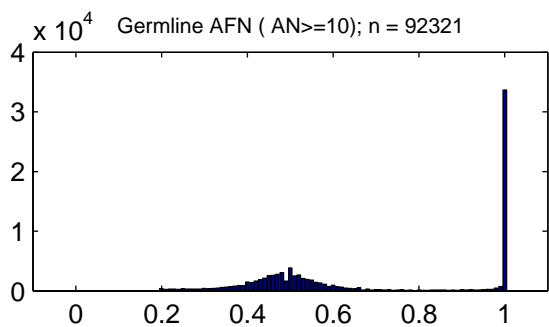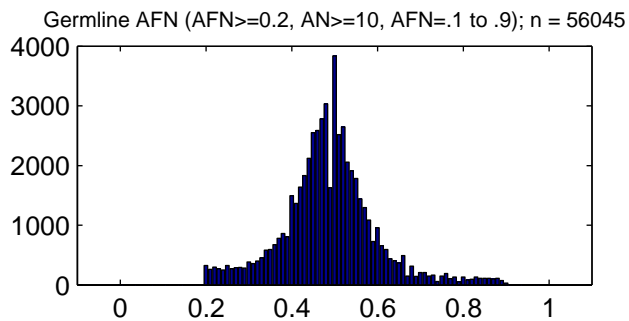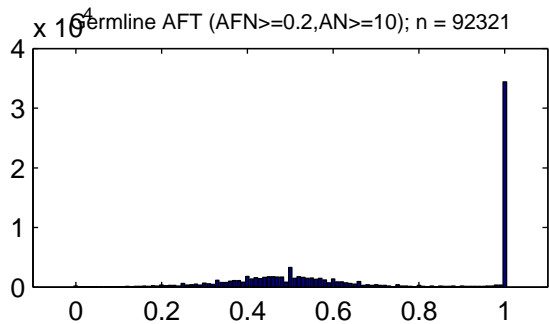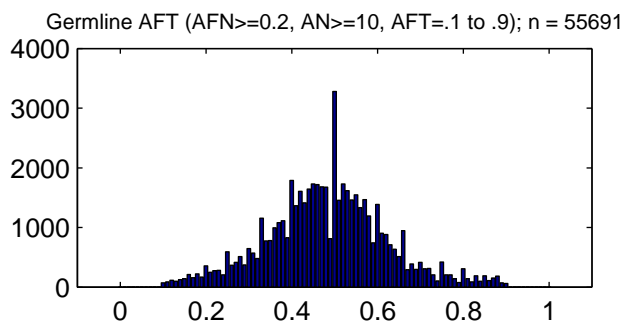

391\_ucsc.edu\_BRCA.IlluminaGA\_DNASeq.Level\_2.2.0.0 -- TCGA-A2-A0T7\_D

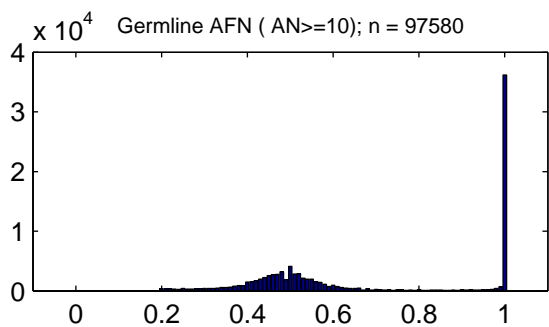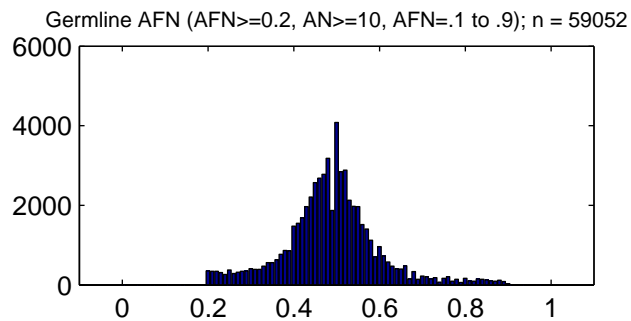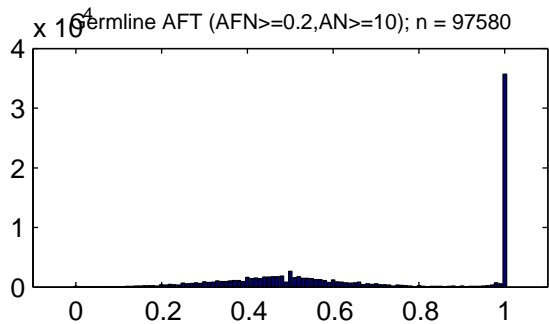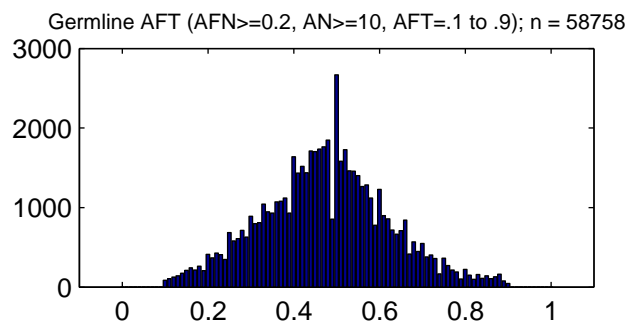



392\_ucsc.edu\_BRCA.IlluminaGA\_DNASeq.Level\_2.5.0.0 -- TCGA-AN-A0XS\_D

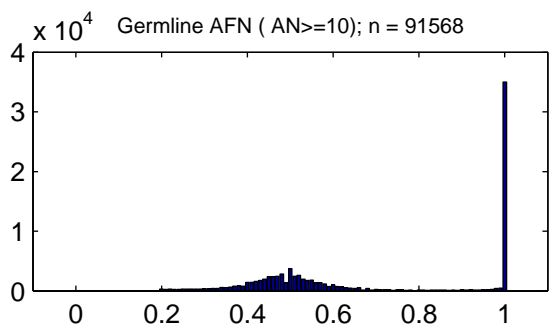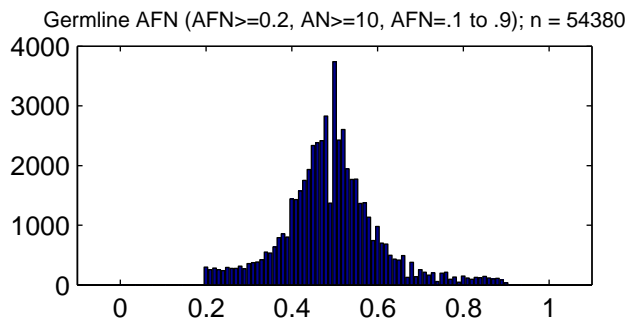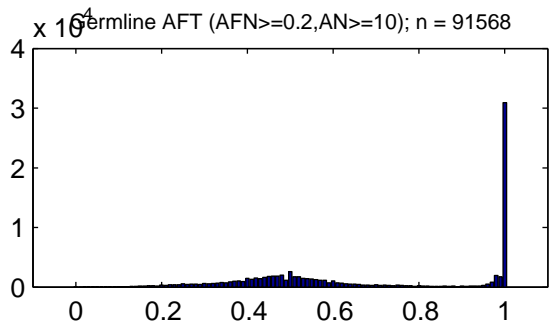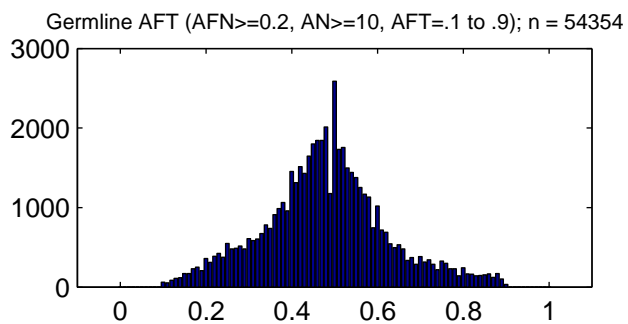

393\_ucsc.edu\_BRCA.IlluminaGA\_DNASeq.Level\_2.9.0.0 -- TCGA-B6-A0RH\_D

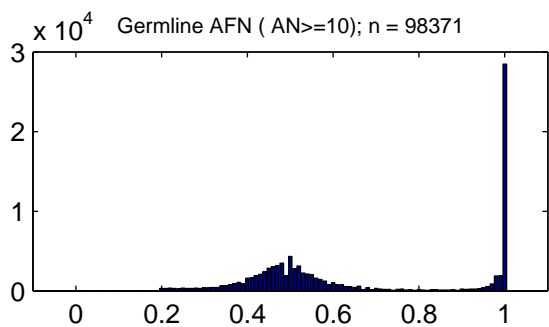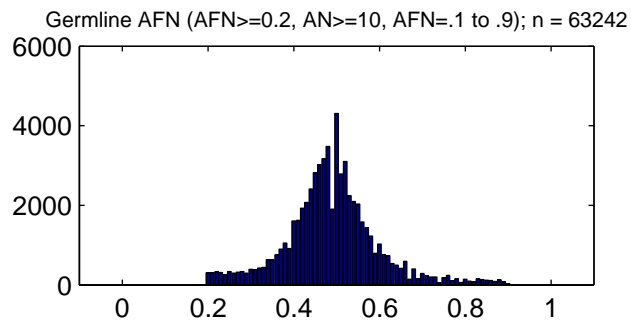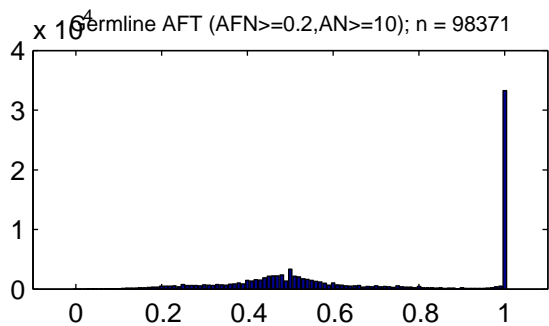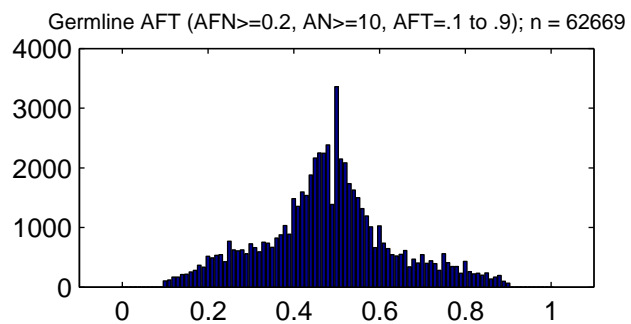

394\_ucsc.edu\_BRCA.IlluminaGA\_DNASeq.Level\_2.6.0.0 -- TCGA-AO-A03T\_W

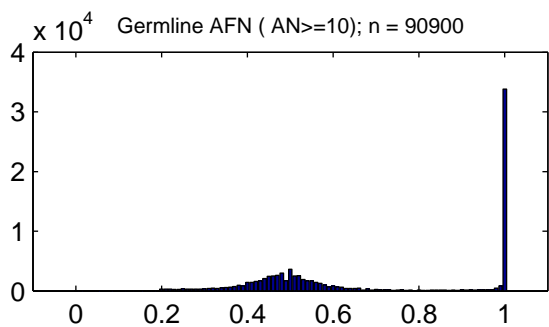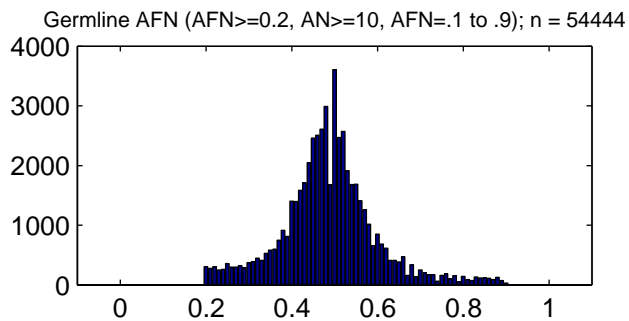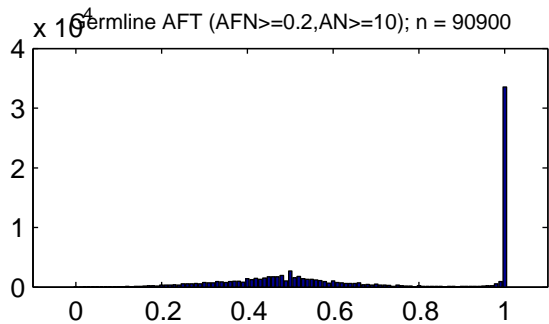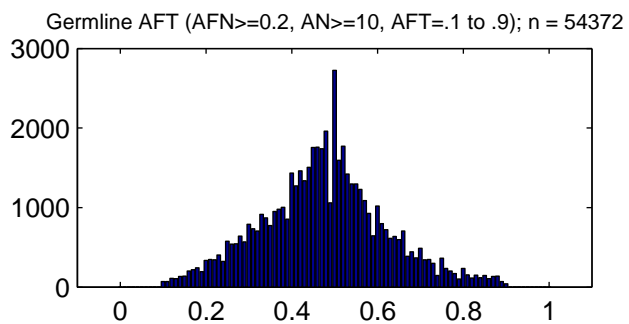

395\_ucsc.edu\_BRCA.IlluminaGA\_DNASeq.Level\_2.9.0.0 -- TCGA-B6-A0WT\_D

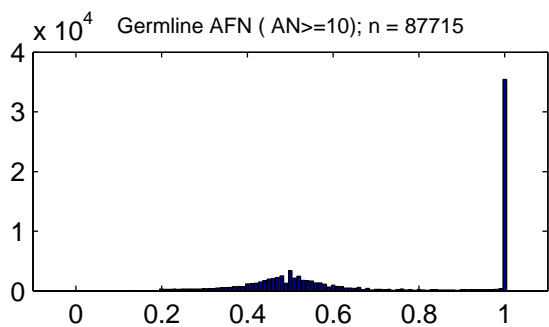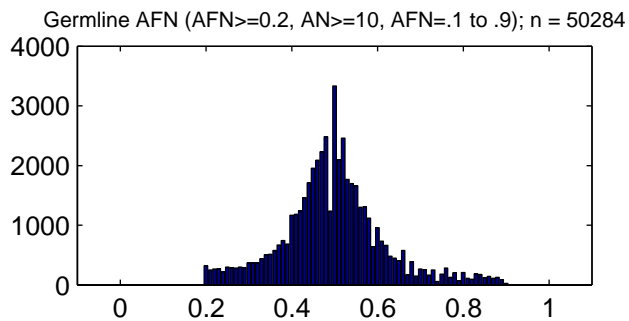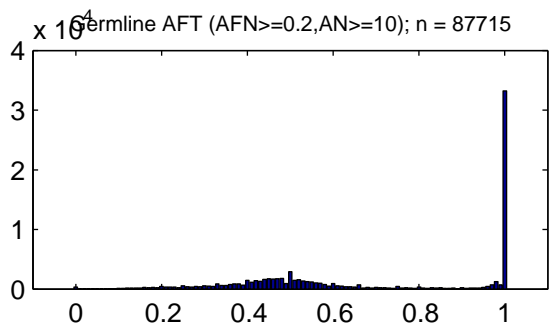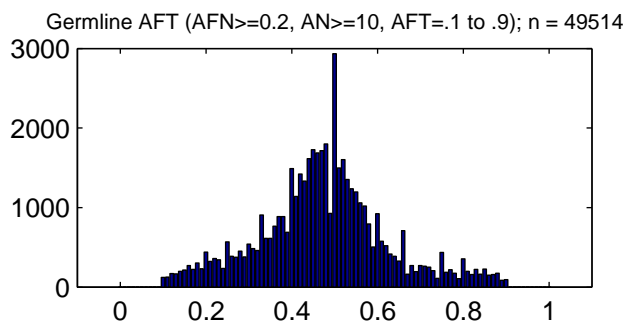

396\_ucsc.edu\_BRCA.IlluminaGA\_DNASeq.Level\_2.2.0.0 -- TCGA-A2-A0YF\_D

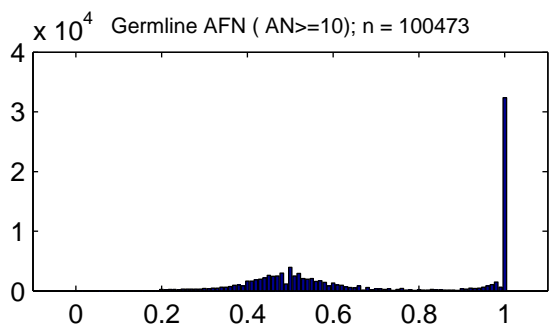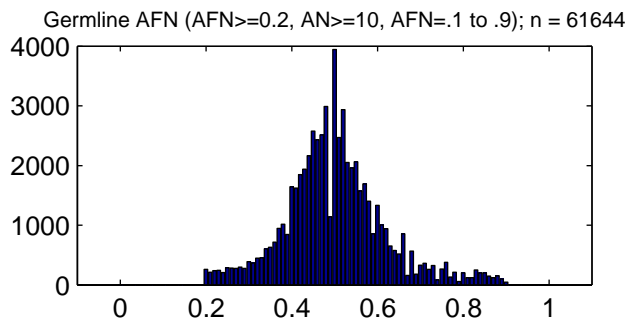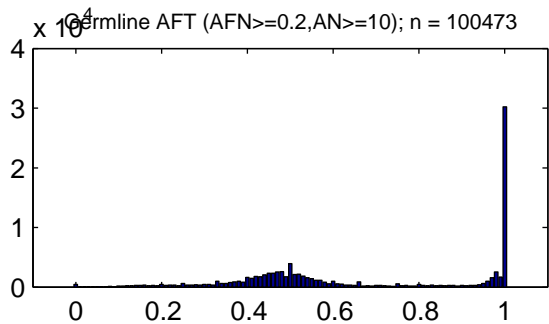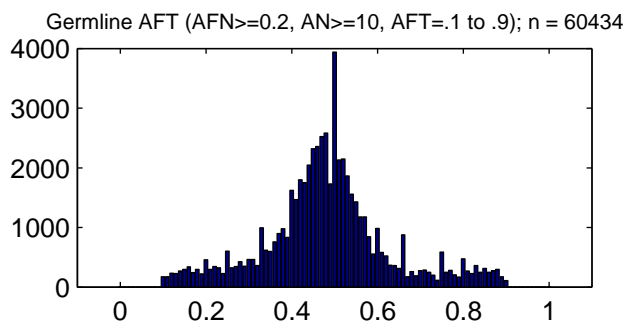

397\_ucsc.edu\_BRCA.IlluminaGA\_DNASeq.Level\_2.10.0.0 -- TCGA-BH-A0H9\_V

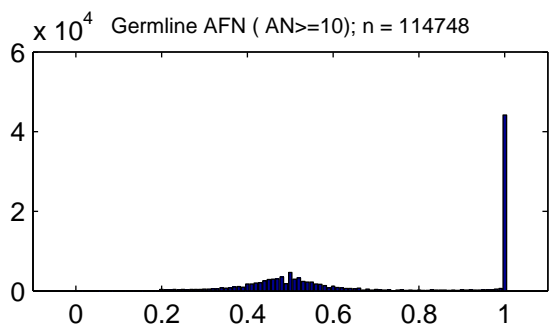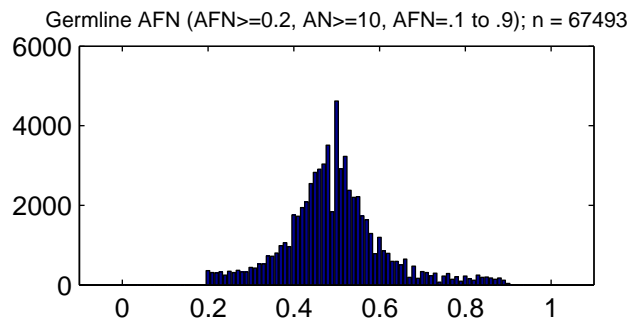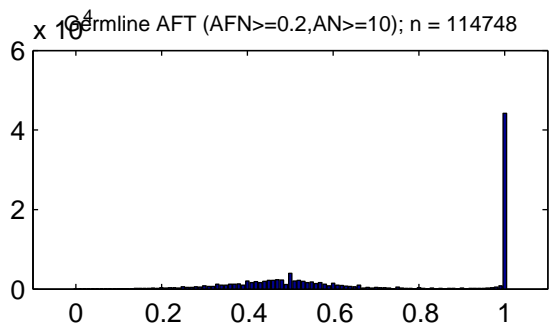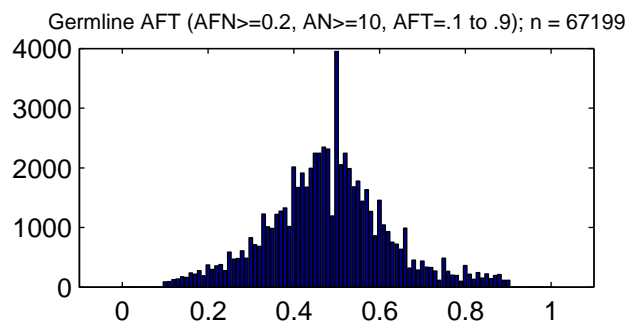

398\_ucsc.edu\_BRCA.IlluminaGA\_DNASeq.Level\_2.6.0.0 -- TCGA-AO-A0JJ\_W

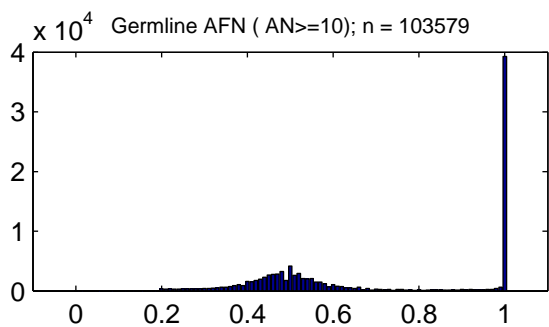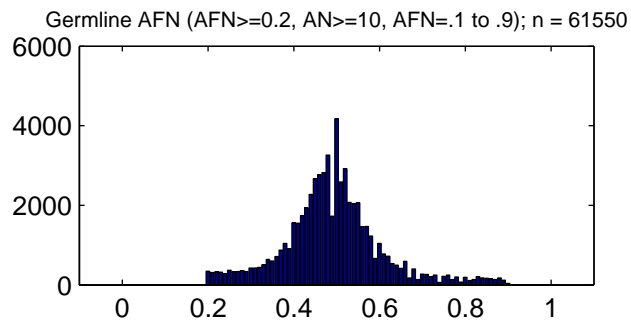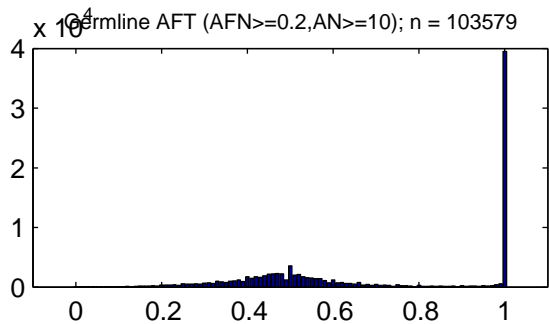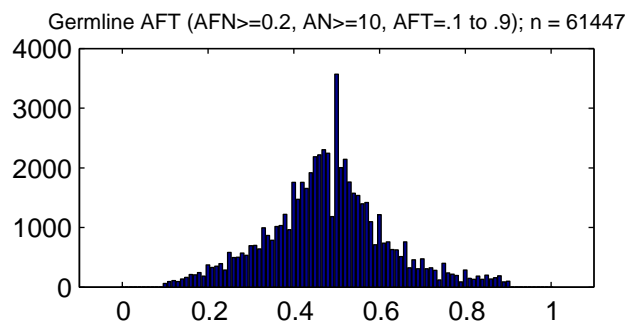

399\_ucsc.edu\_BRCA.IlluminaGA\_DNASeq.Level\_2.13.0.0 -- TCGA-E2-A15I\_D

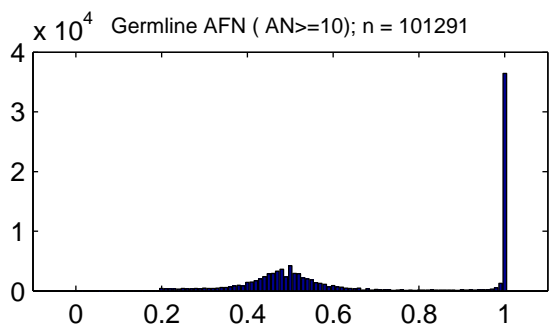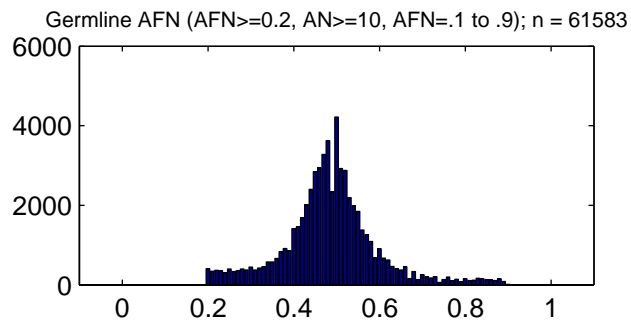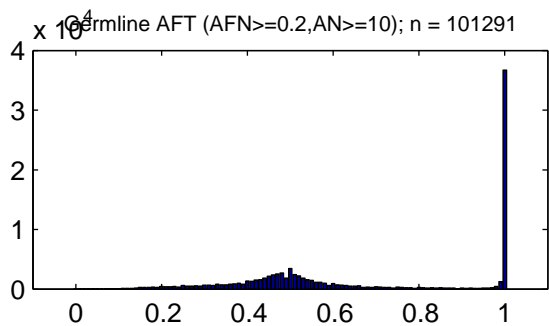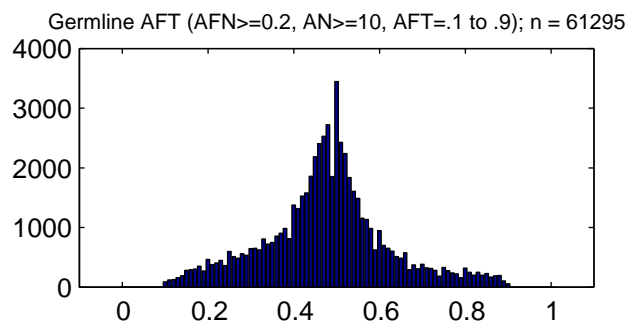



400\_ucsc.edu\_BRCA.IlluminaGA\_DNASeq.Level\_2.10.0.0 -- TCGA-BH-A18J\_D

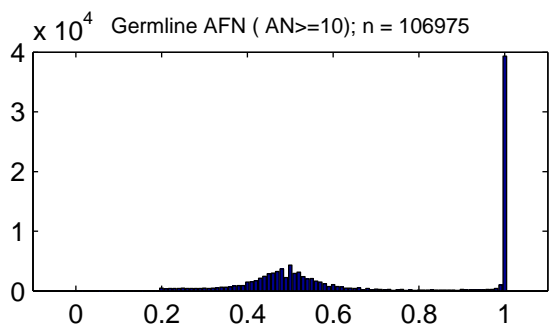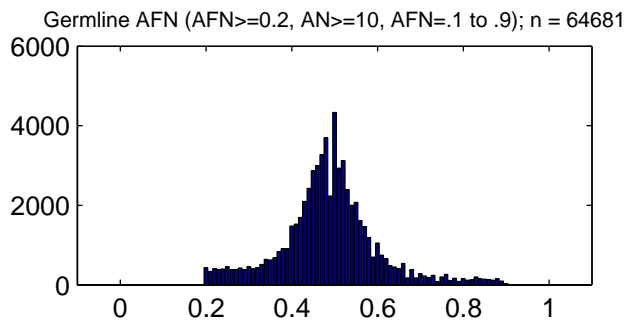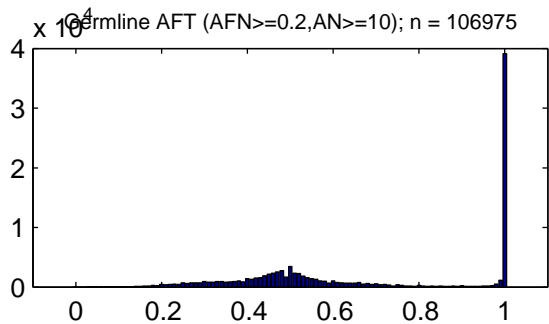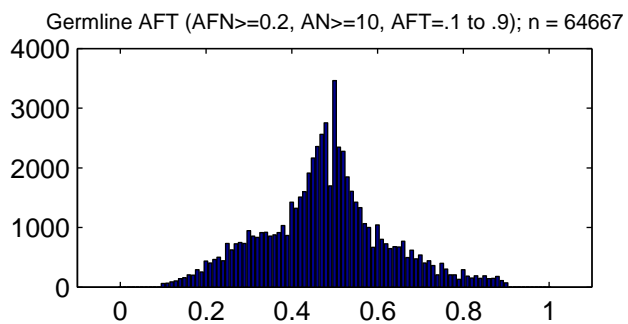

401\_ucsc.edu\_BRCA.IlluminaGA\_DNASeq.Level\_2.5.0.0 -- TCGA-AN-A0XR\_D

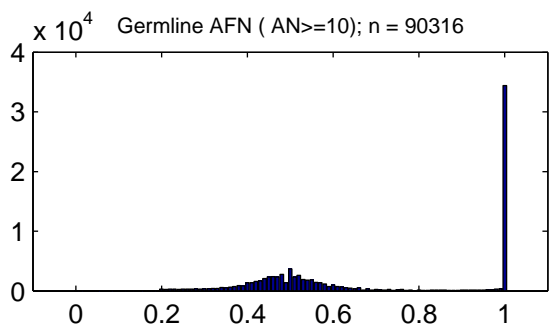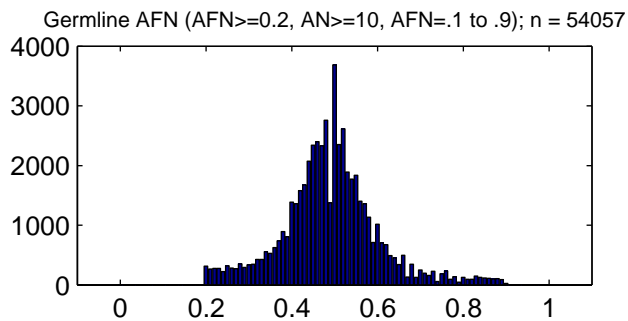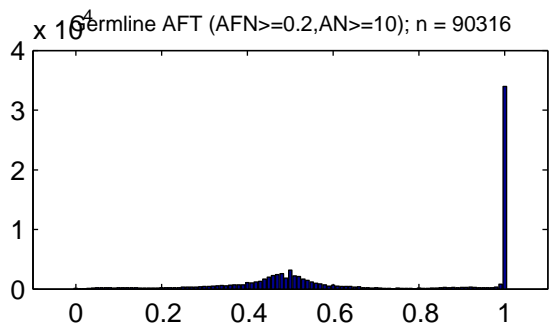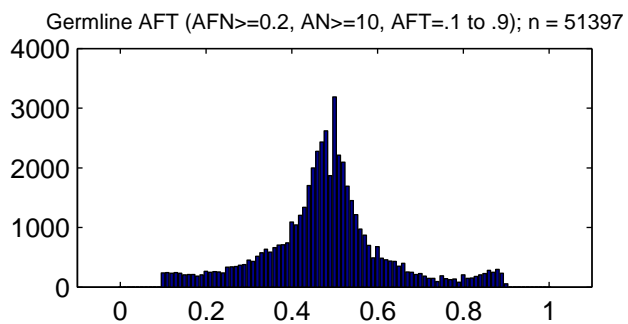

402\_ucsc.edu\_BRCA.IlluminaGA\_DNASeq.Level\_2.2.0.0 -- TCGA-A2-A0CP\_W

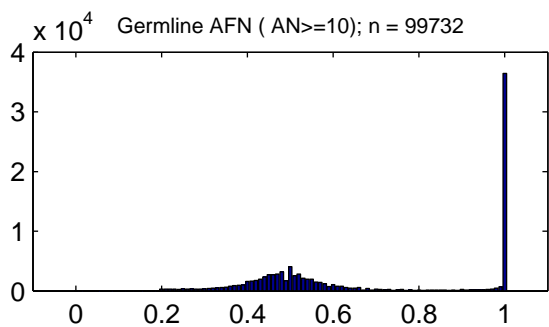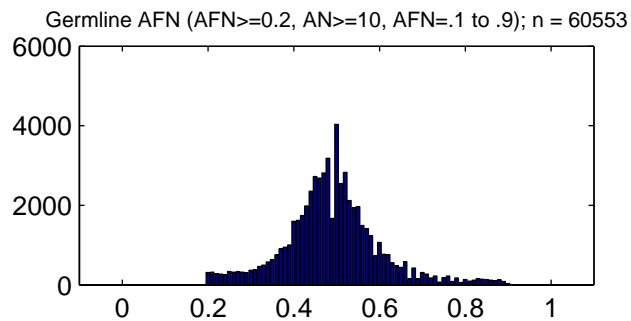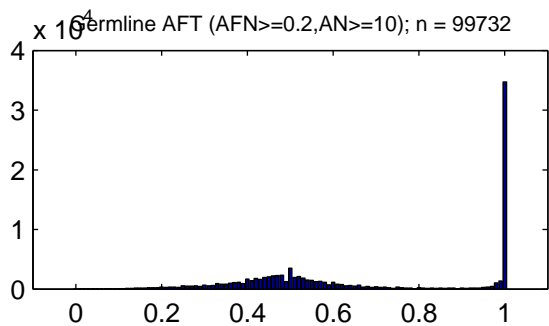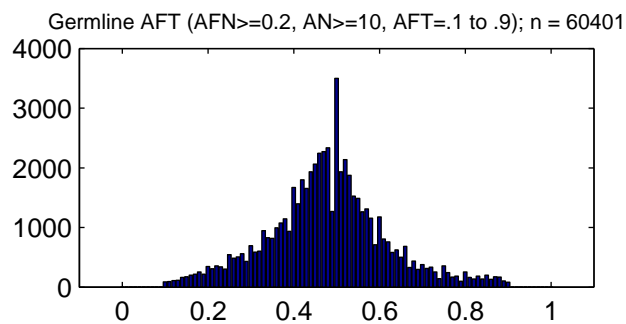

403\_ucsc.edu\_BRCA.IlluminaGA\_DNASeq.Level\_2.1.0.0 -- TCGA-A1-A0SD\_D

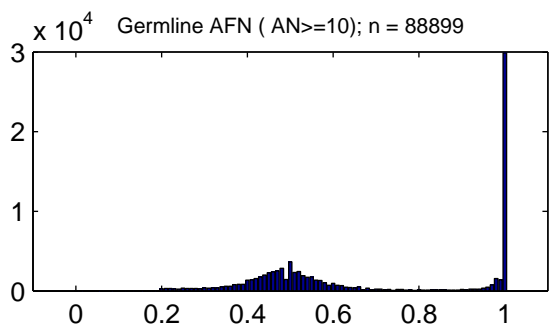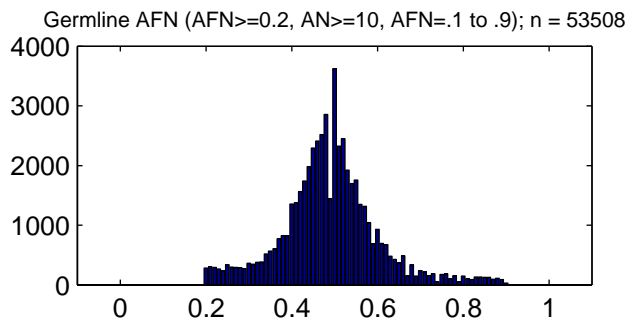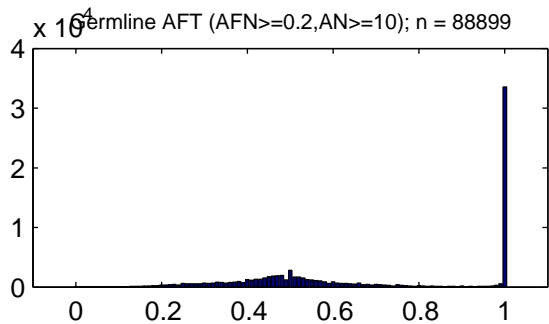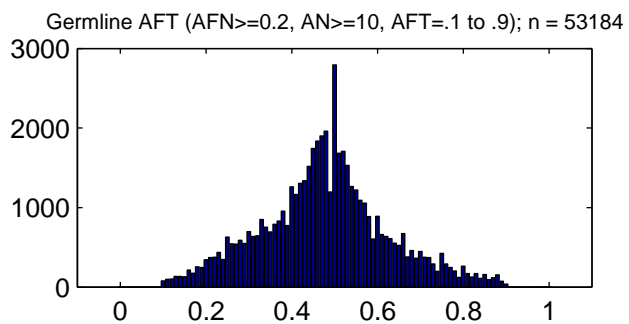

404\_ucsc.edu\_BRCA.IlluminaGA\_DNASeq.Level\_2.2.0.0 -- TCGA-A2-A04Y\_W

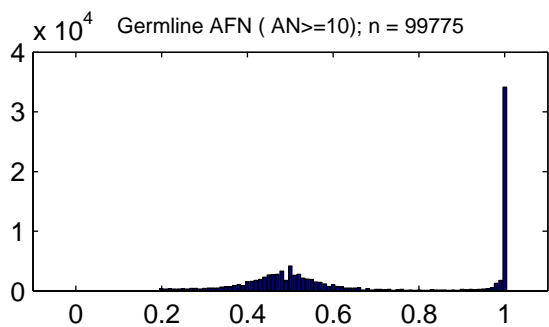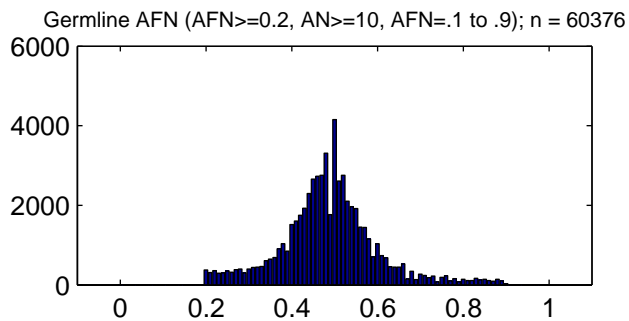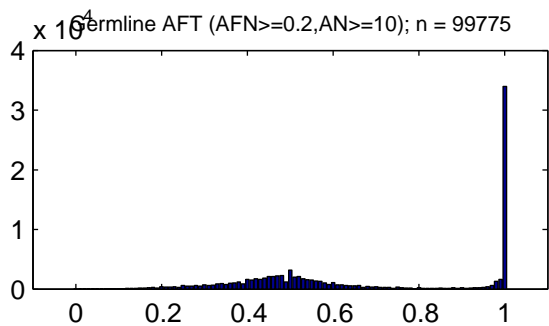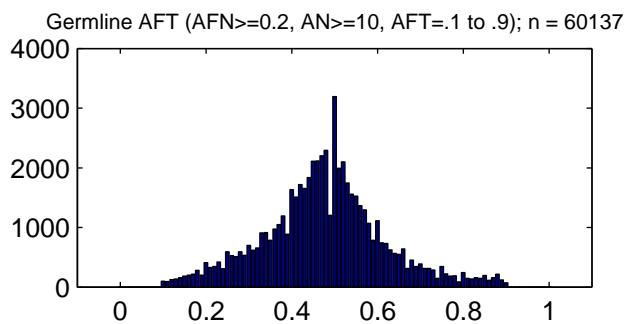

405\_ucsc.edu\_BRCA.IlluminaGA\_DNASeq.Level\_2.6.0.0 -- TCGA-AO-A0J5\_W

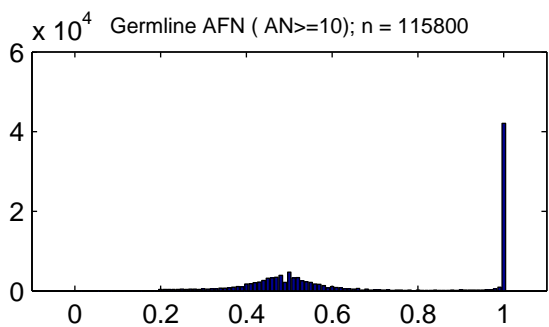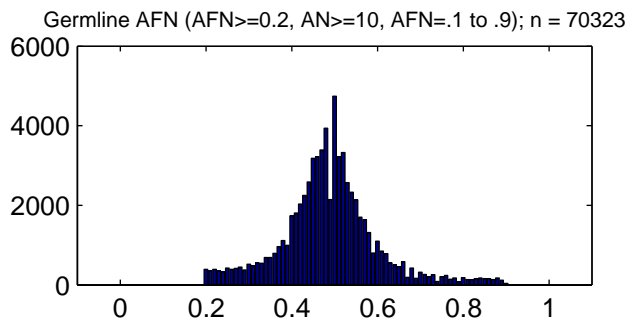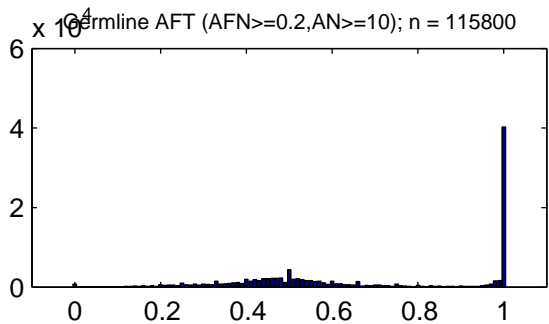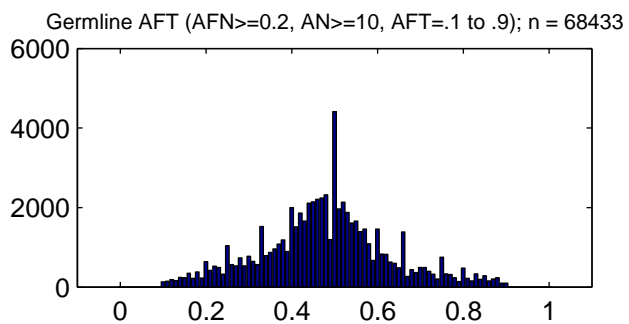

406\_ucsc.edu\_BRCA.IlluminaGA\_DNASeq.Level\_2.9.0.0 -- TCGA-B6-A0RI\_W

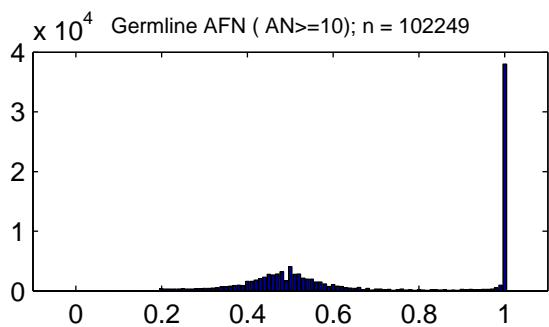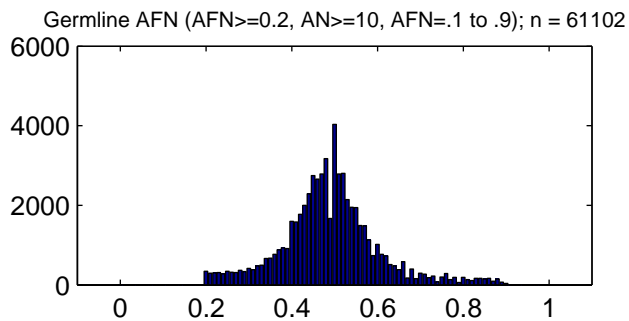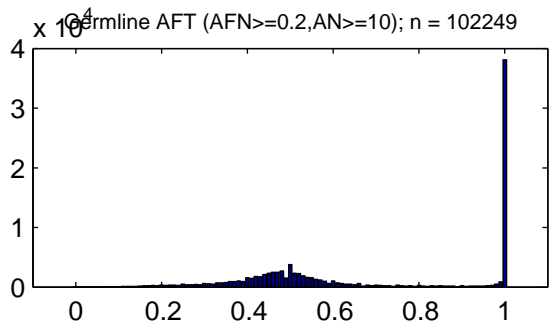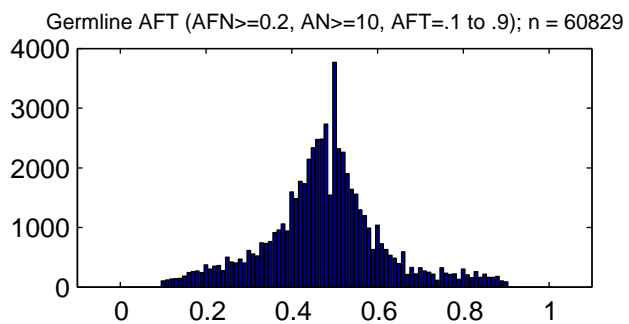

407\_ucsc.edu\_BRCA.IlluminaGA\_DNASeq.Level\_2.6.0.0 -- TCGA-AO-A0JE\_W

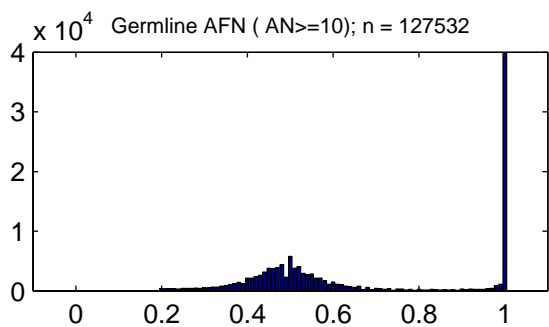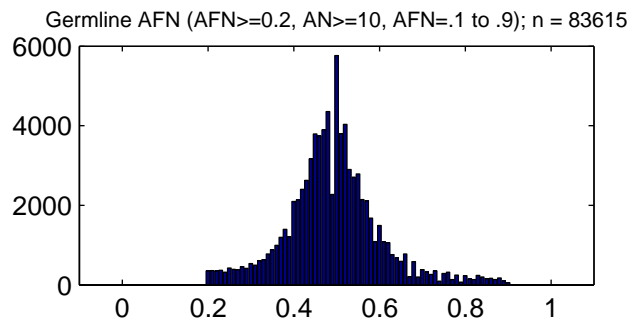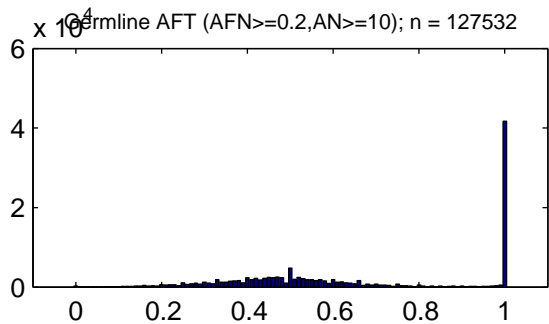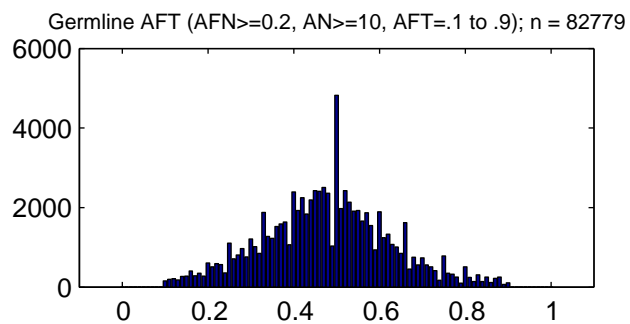



408\_ucsc.edu\_BRCA.IlluminaGA\_DNASeq.Level\_2.2.0.0 -- TCGA-A2-A0EM\_W

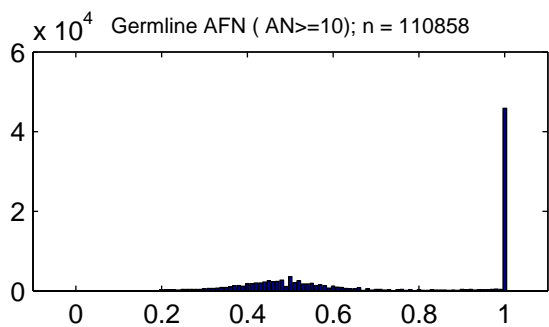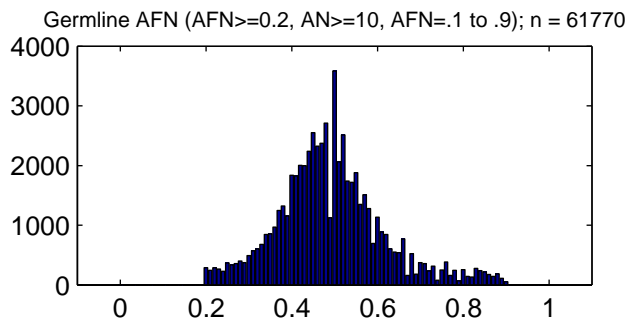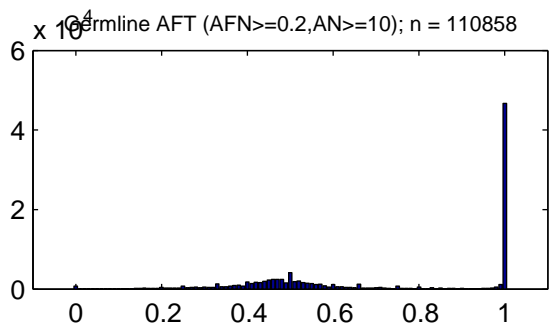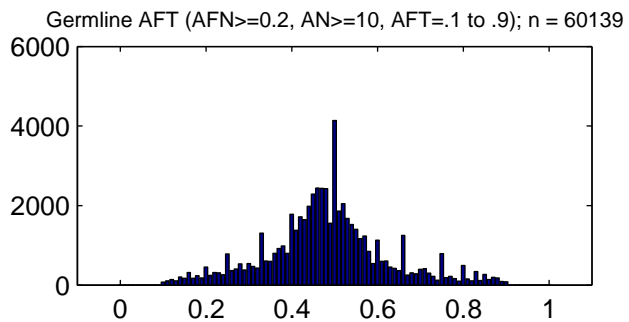

409\_ucsc.edu\_BRCA.IlluminaGA\_DNASeq.Level\_2.1.0.0 -- TCGA-A1-A0SE\_D

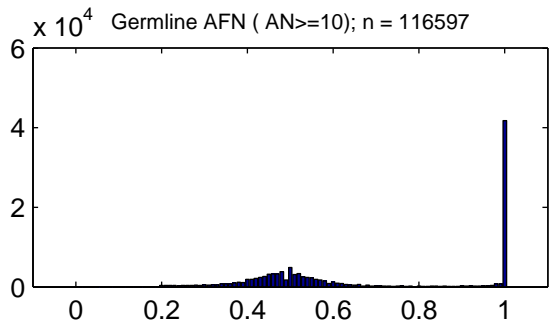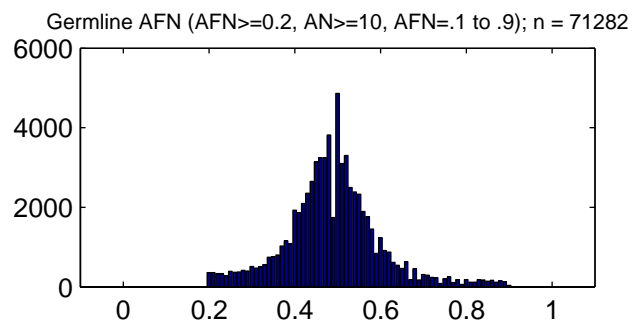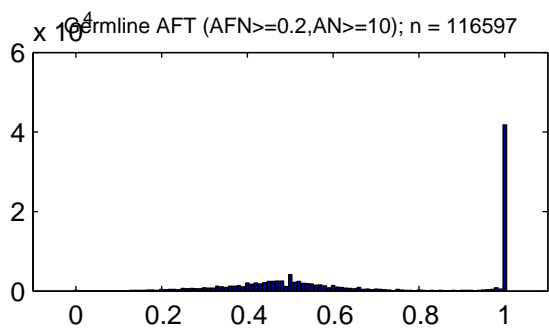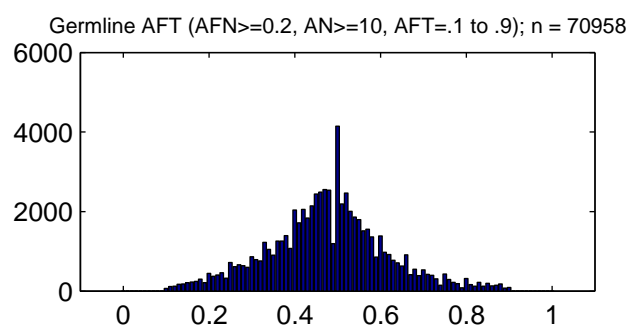

410\_ucsc.edu\_BRCA.IlluminaGA\_DNASeq.Level\_2.9.0.0 -- TCGA-B6-A0X7\_D

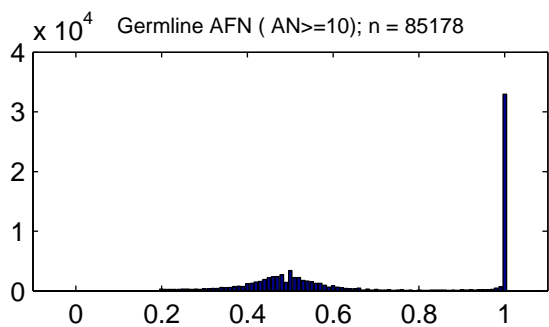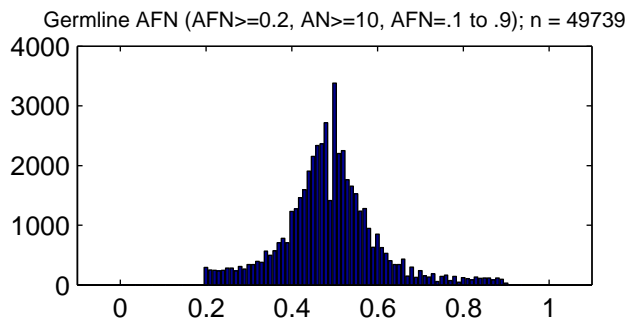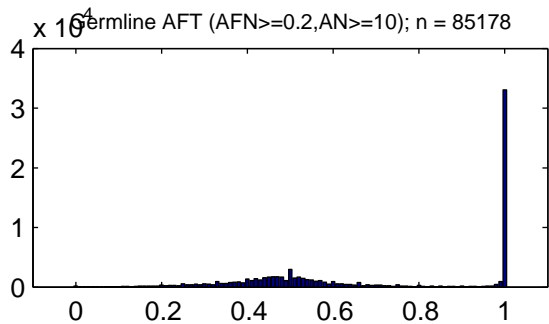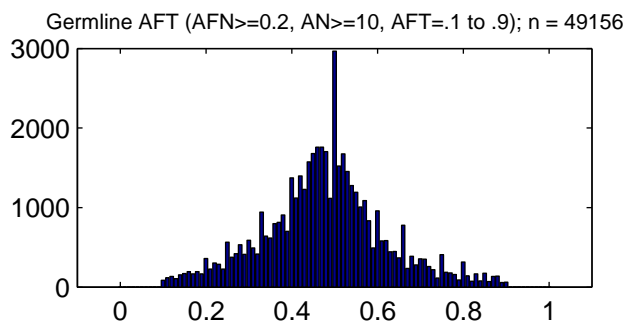

411\_ucsc.edu\_BRCA.IlluminaGA\_DNASeq.Level\_2.13.0.0 -- TCGA-E2-A15K\_C

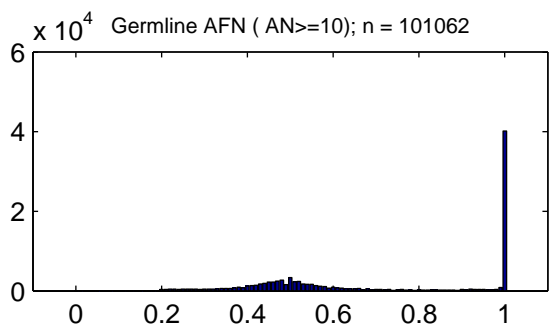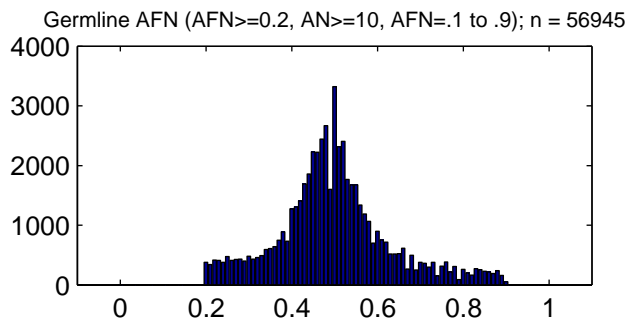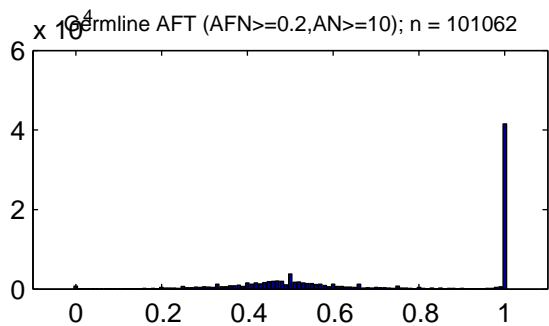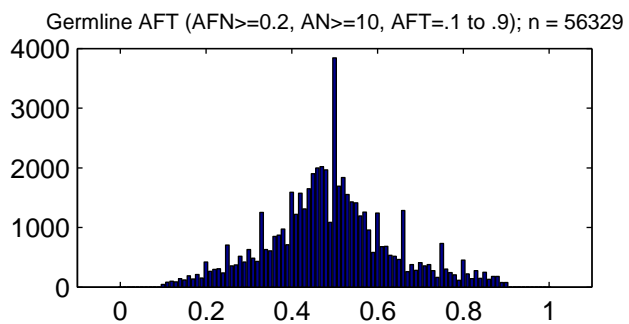

412\_ucsc.edu\_BRCA.IlluminaGA\_DNASeq.Level\_2.5.0.0 -- TCGA-AN-AOFF\_W

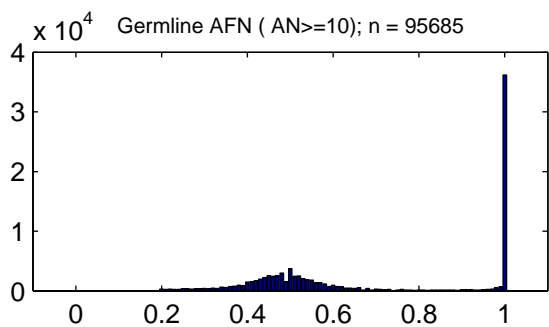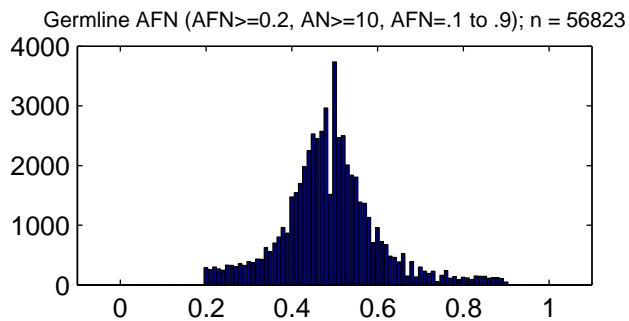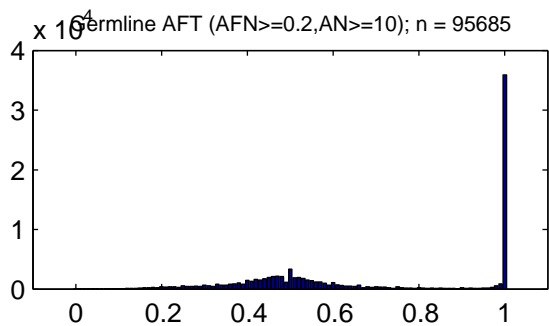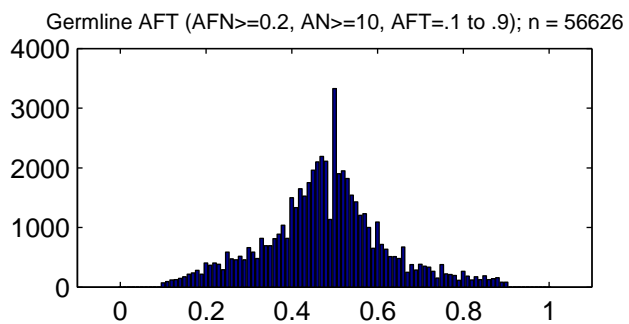

413\_ucsc.edu\_BRCA.IlluminaGA\_DNASeq.Level\_2.6.0.0 -- TCGA-AO-A12A\_D

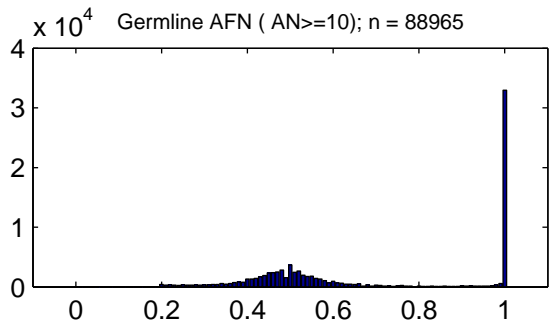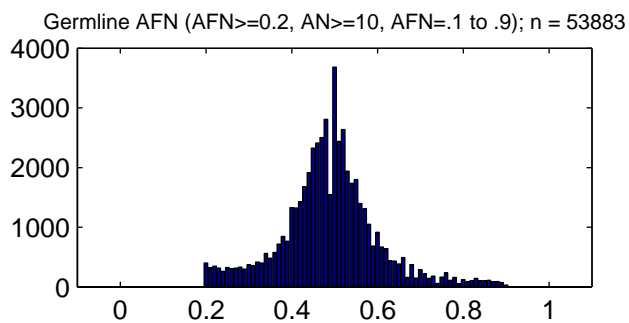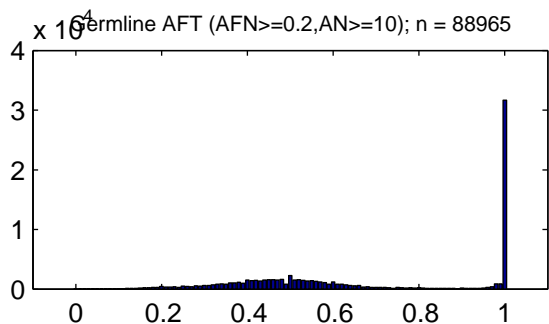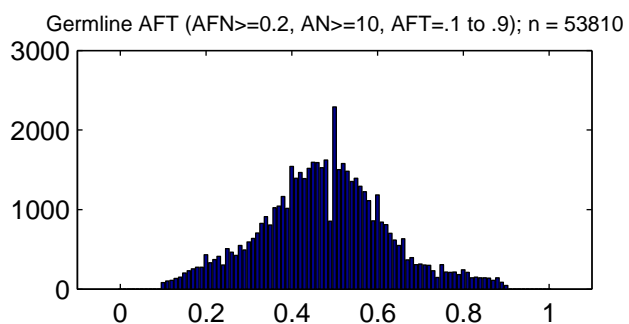

414\_ucsc.edu\_BRCA.IlluminaGA\_DNASeq.Level\_2.10.0.0 -- TCGA-BH-A0HP\_I

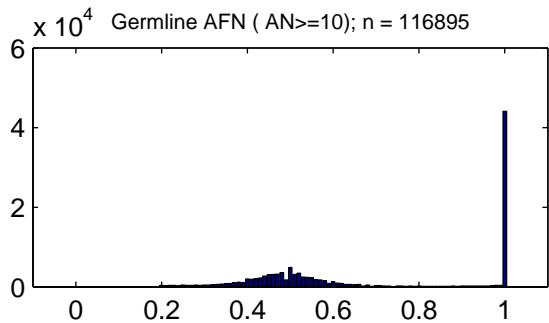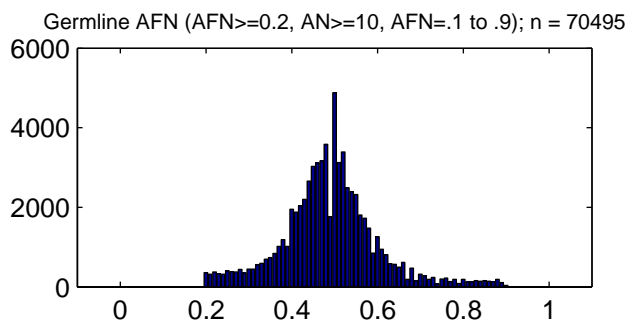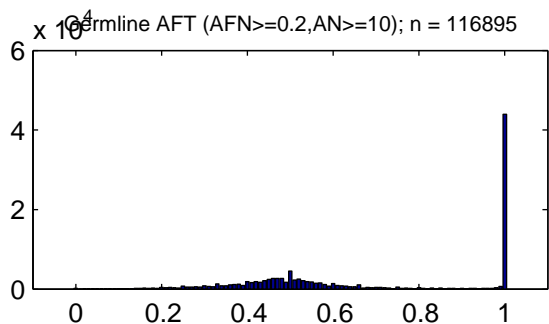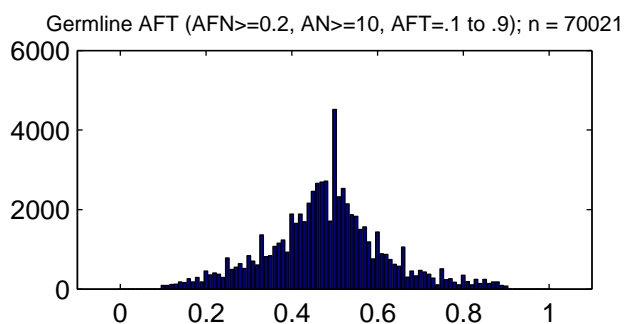

415\_ucsc.edu\_BRCA.IlluminaGA\_DNASeq.Level\_2.10.0.0 -- TCGA-BH-A0C3\_C

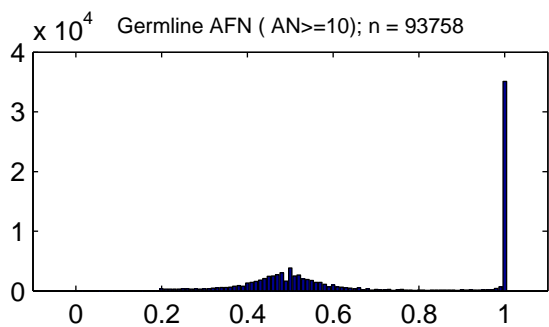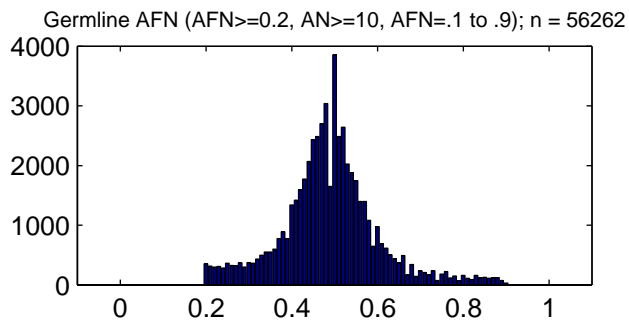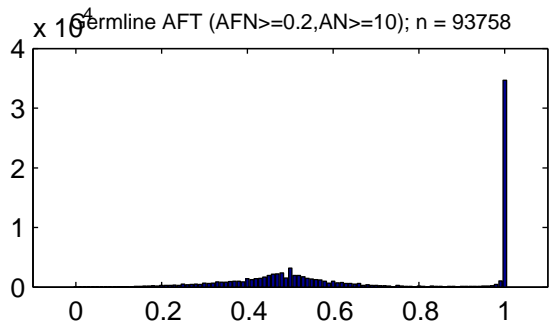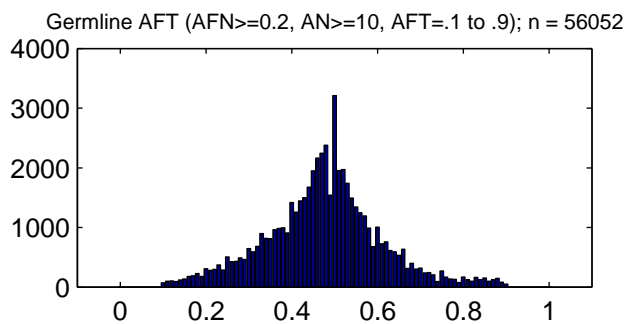



416\_ucsc.edu\_BRCA.IlluminaGA\_DNASeq.Level\_2.13.0.0 -- TCGA-E2-A15P\_D

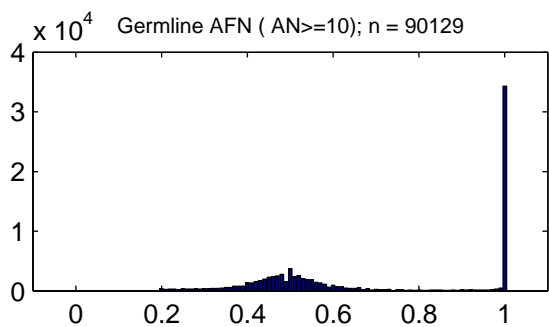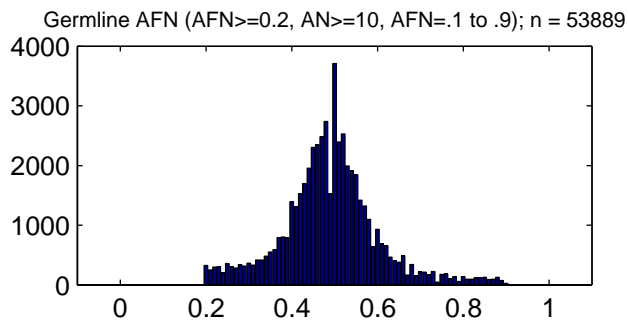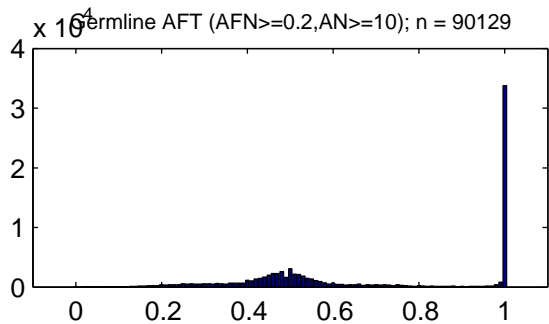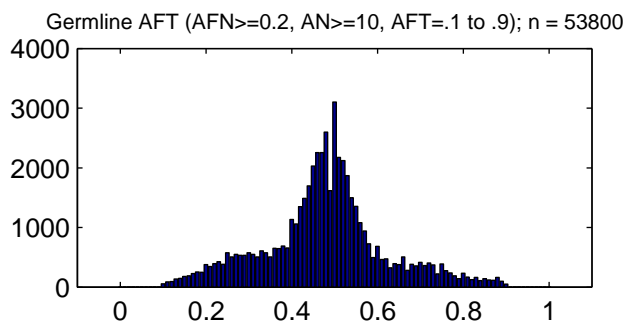

417\_ucsc.edu\_BRCA.IlluminaGA\_DNASeq.Level\_2.4.0.0 -- TCGA-A8-A08H\_W

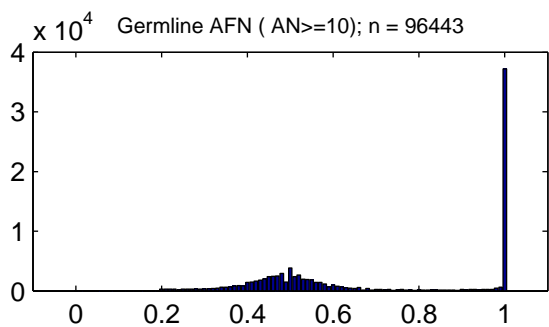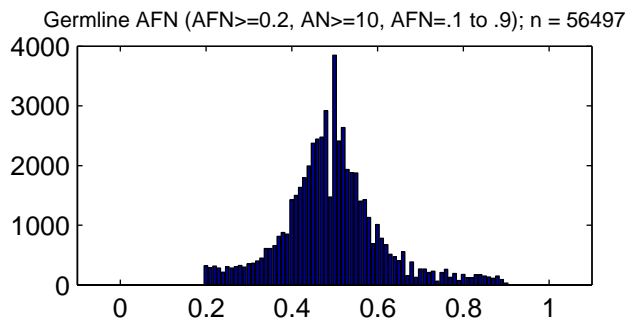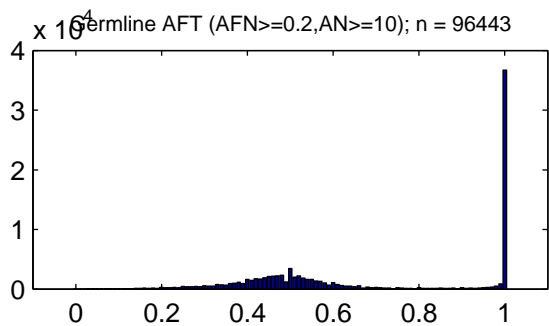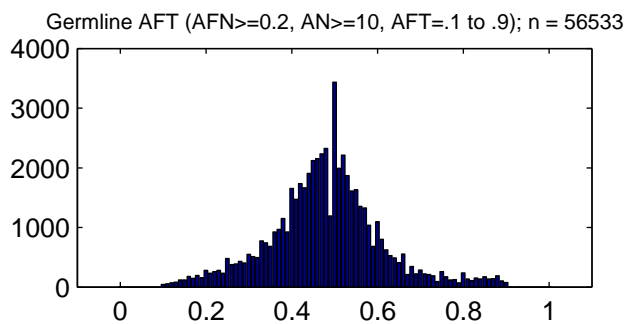

418\_ucsc.edu\_BRCA.IlluminaGA\_DNASeq.Level\_2.13.0.0 -- TCGA-E2-A15C\_C

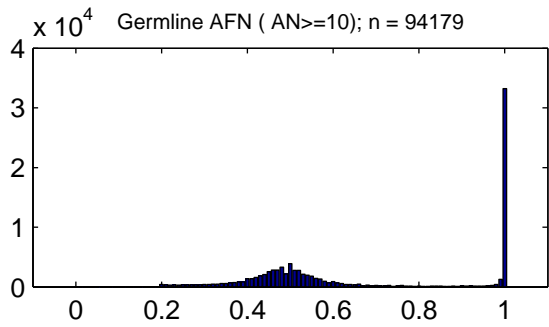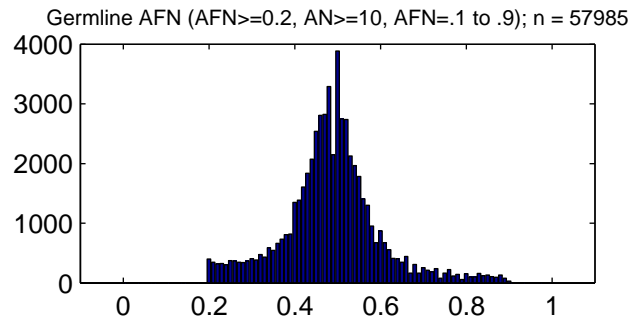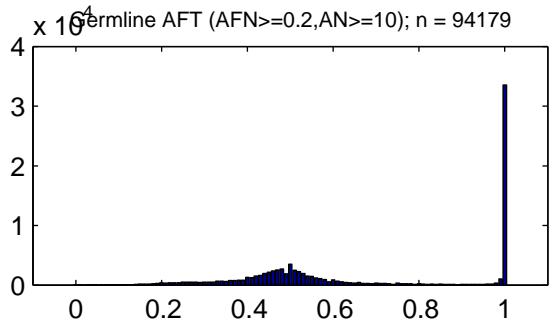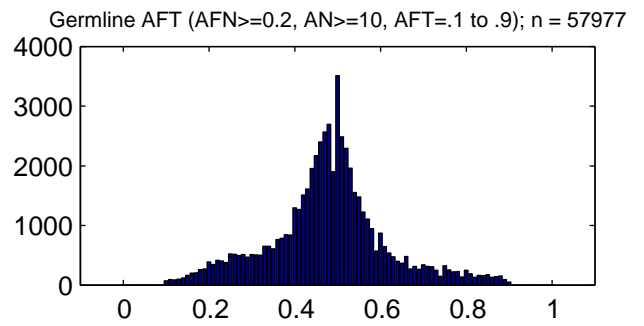

419\_ucsc.edu\_BRCA.IlluminaGA\_DNASeq.Level\_2.2.0.0 -- TCGA-A2-A0CQ\_W

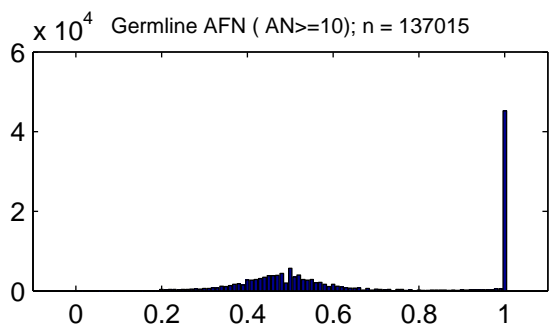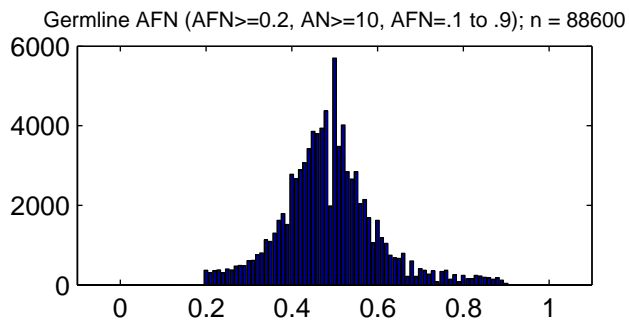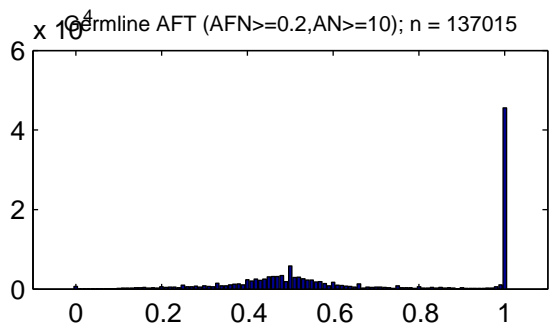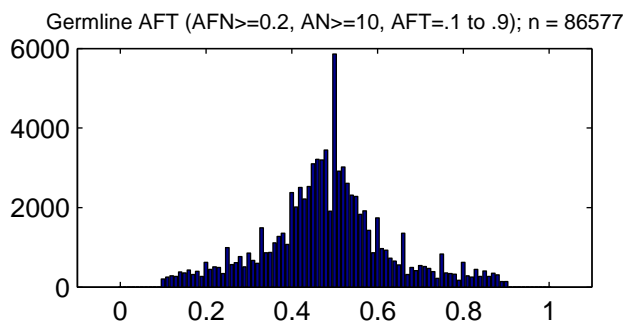

420\_ucsc.edu\_BRCA.IlluminaGA\_DNASeq.Level\_2.9.0.0 -- TCGA-B6-A0RV\_D

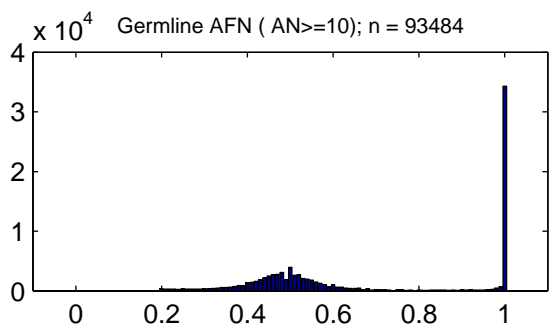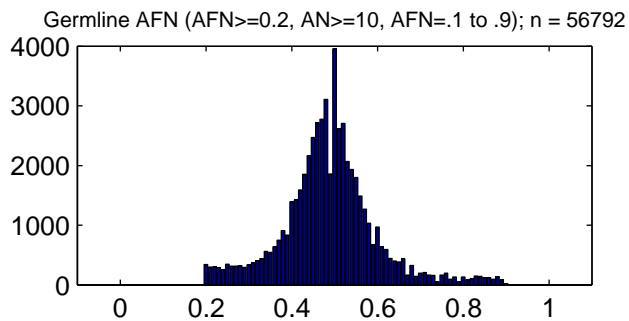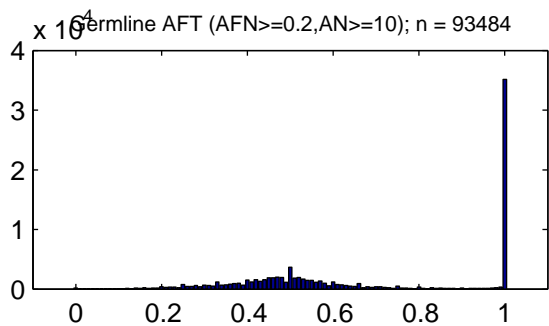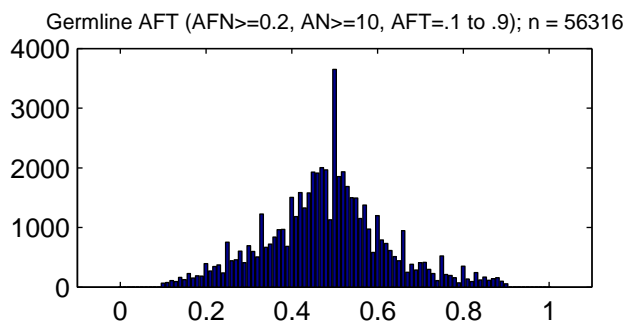

421\_ucsc.edu\_BRCA.IlluminaGA\_DNASeq.Level\_2.14.0.0 -- TCGA-AO-A0J8\_V

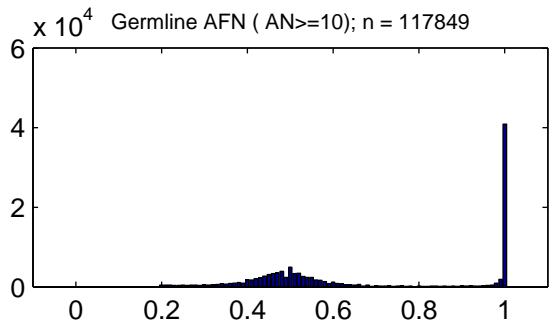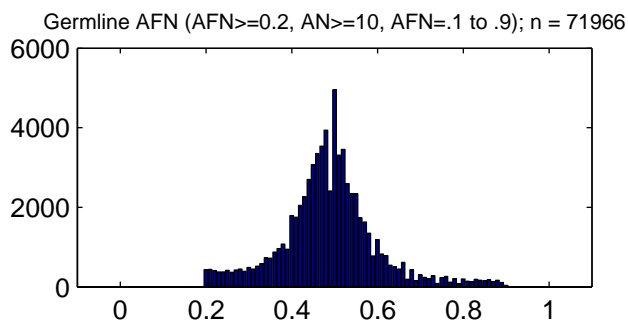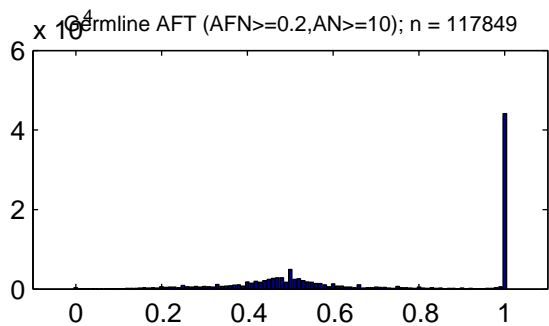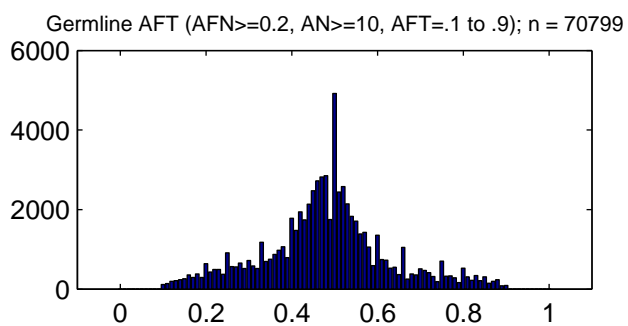

422\_ucsc.edu\_BRCA.IlluminaGA\_DNASeq.Level\_2.2.0.0 -- TCGA-A2-A0ER\_W

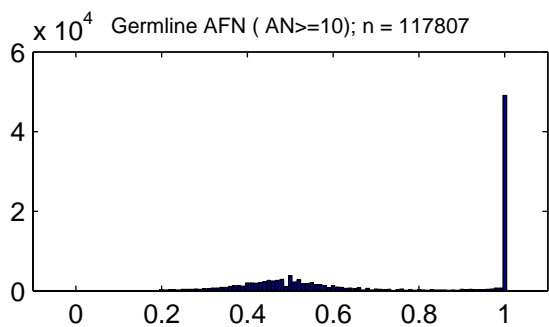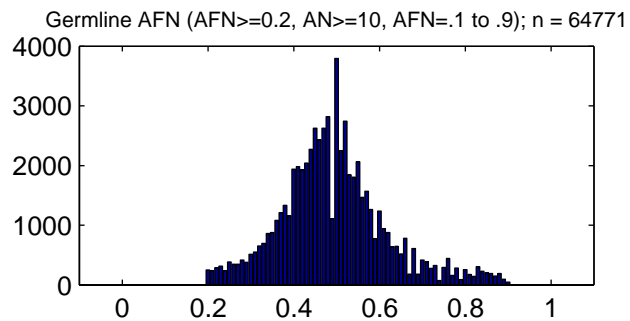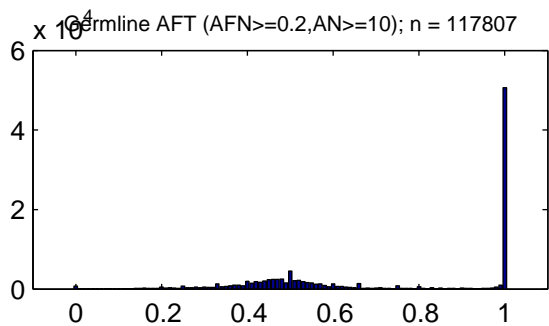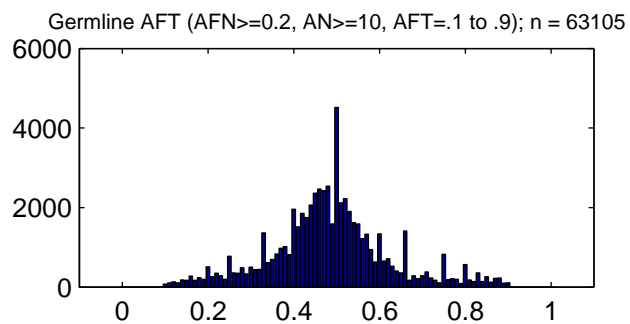

423\_ucsc.edu\_BRCA.IlluminaGA\_DNASeq.Level\_2.8.0.0 -- TCGA-AR-A1AJ\_D

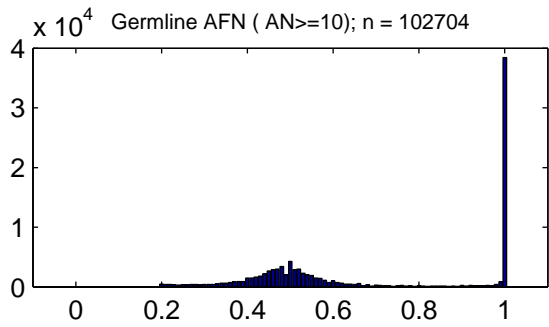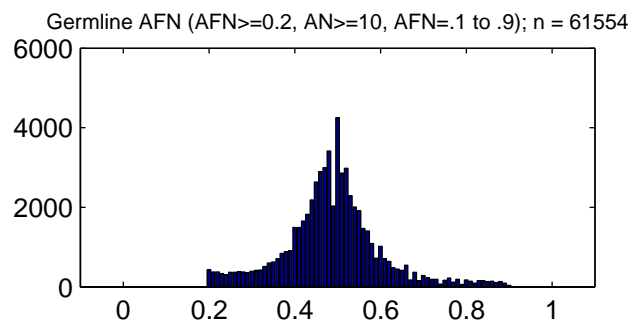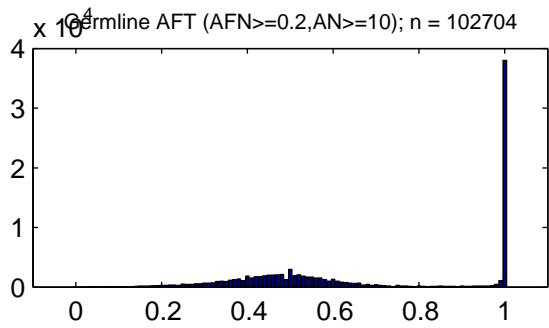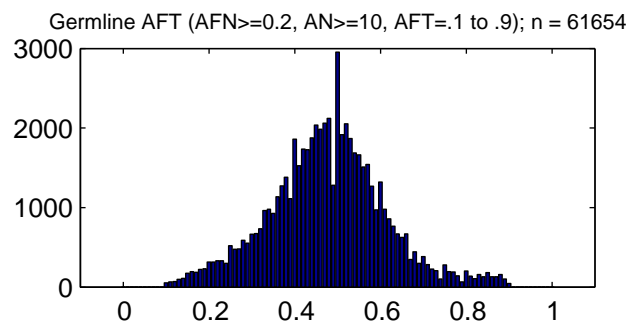



424\_ucsc.edu\_BRCA.IlluminaGA\_DNASeq.Level\_2.10.0.0 -- TCGA-BH-A0HA\_I

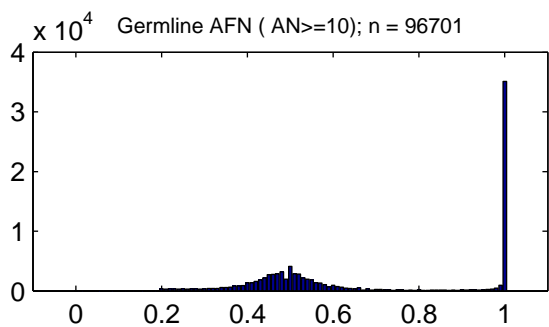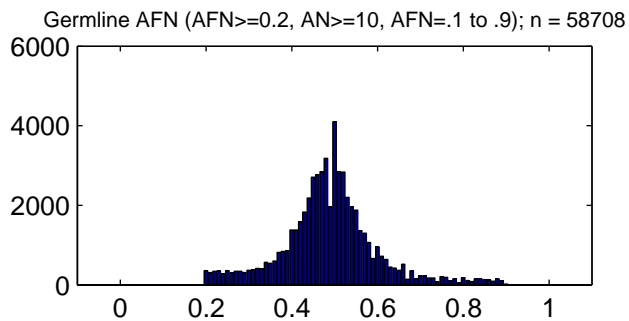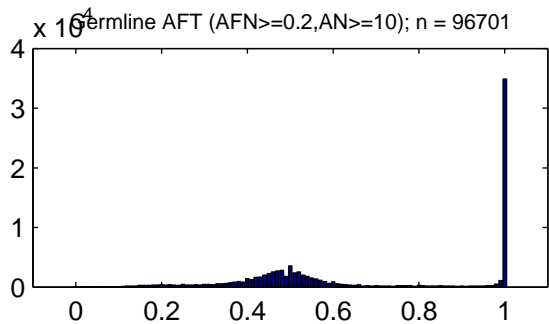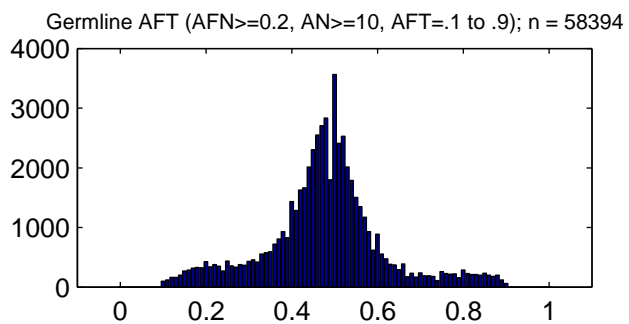

425\_ucsc.edu\_BRCA.IlluminaGA\_DNASeq.Level\_2.9.0.0 -- TCGA-B6-A0IM\_W

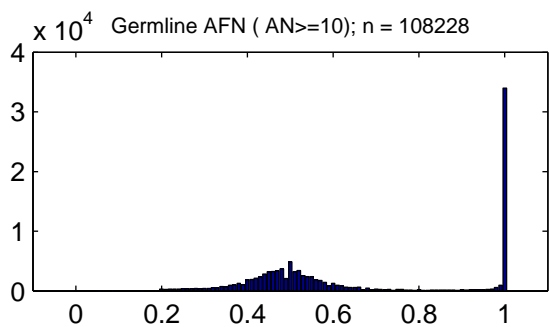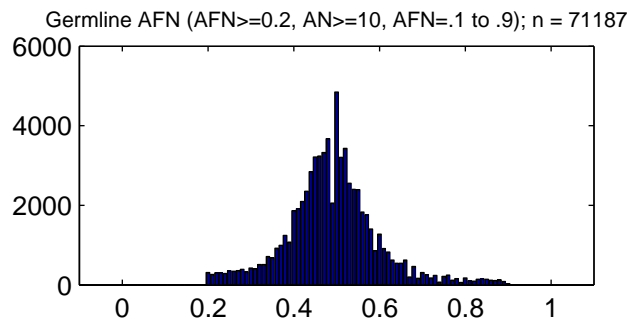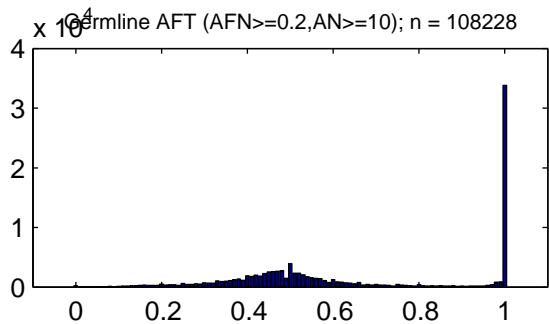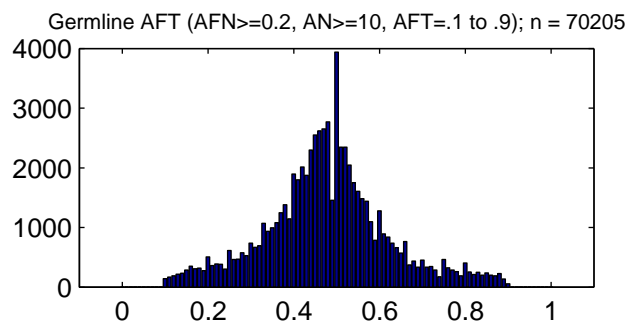

426\_ucsc.edu\_BRCA.IlluminaGA\_DNASeq.Level\_2.10.0.0 -- TCGA-BH-A0BF\_C

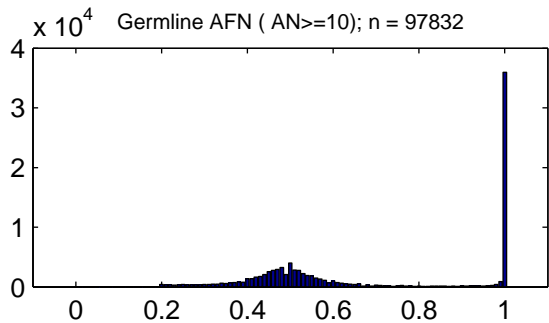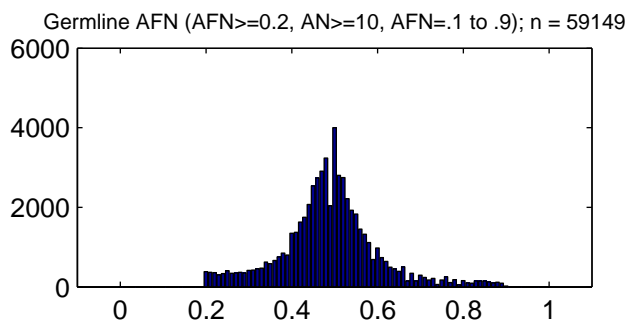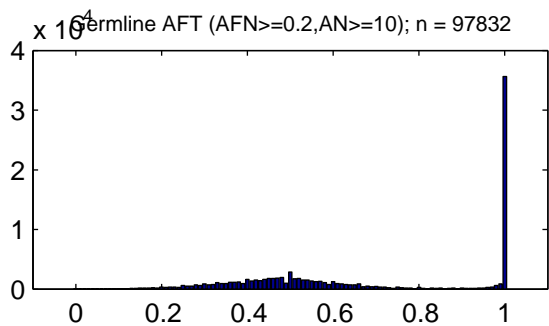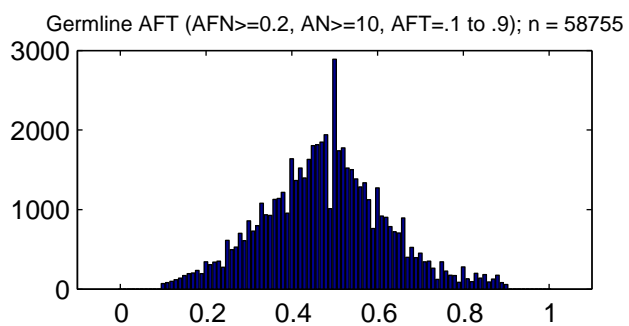

427\_ucsc.edu\_BRCA.IlluminaGA\_DNASeq.Level\_2.10.0.0 -- TCGA-BH-A0BO\_I

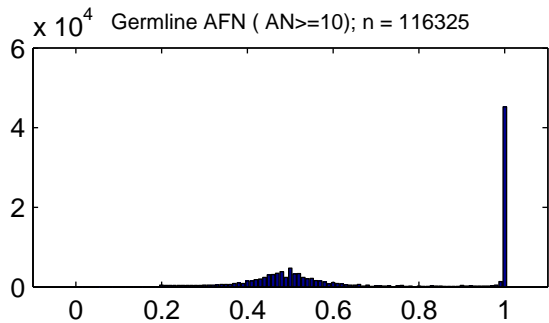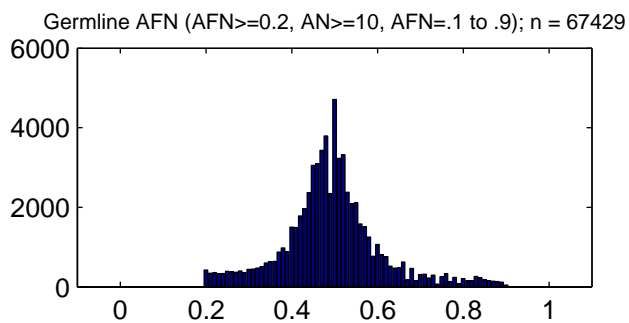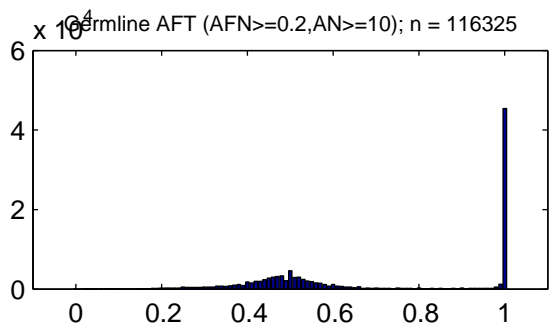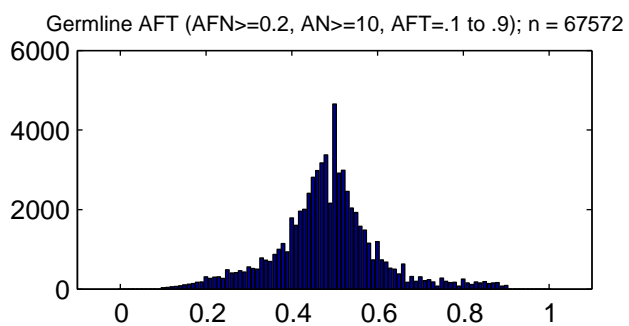

428\_ucsc.edu\_BRCA.IlluminaGA\_DNASeq.Level\_2.2.0.0 -- TCGA-A2-A0YI\_D

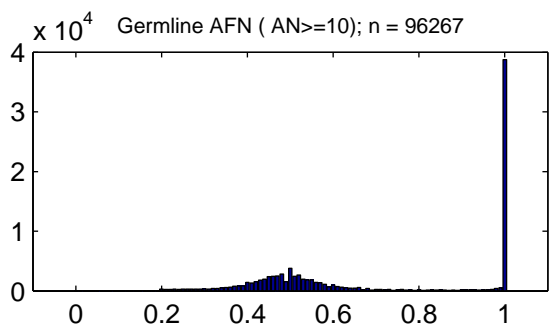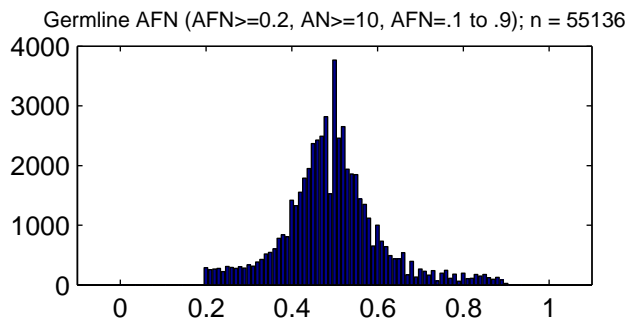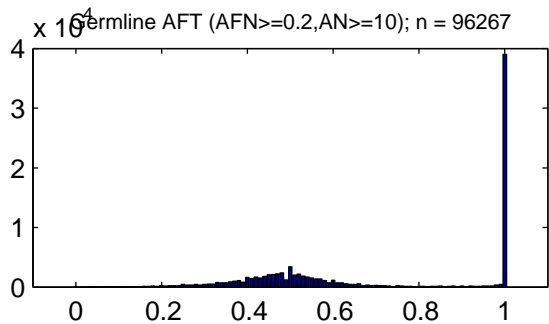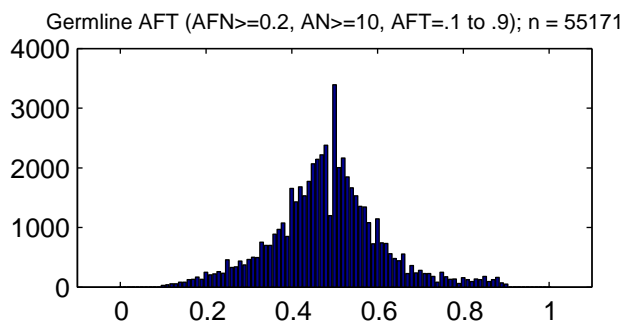

429\_ucsc.edu\_BRCA.IlluminaGA\_DNASeq.Level\_2.9.0.0 -- TCGA-B6-A0IH\_D

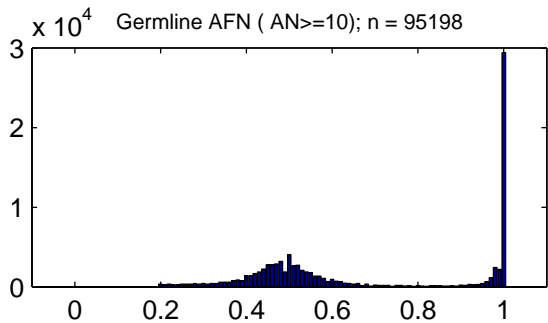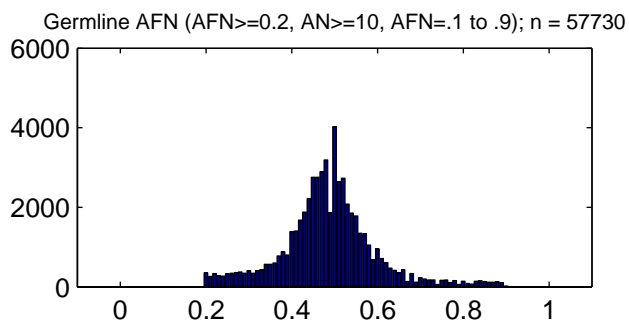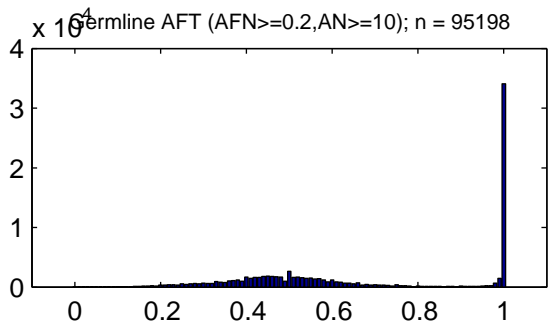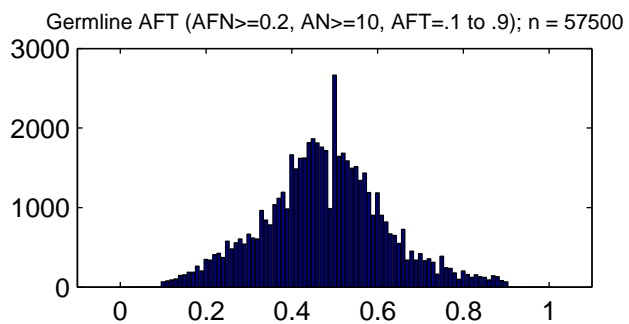

430\_ucsc.edu\_BRCA.IlluminaGA\_DNASeq.Level\_2.10.0.0 -- TCGA-BH-A1EU\_I

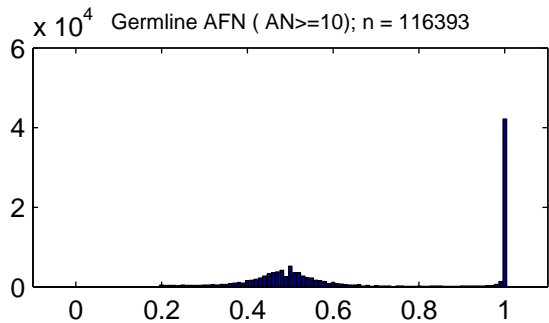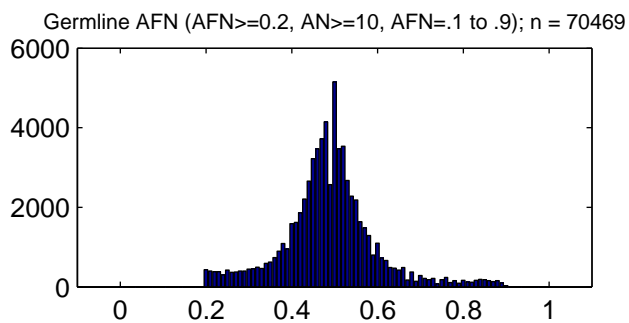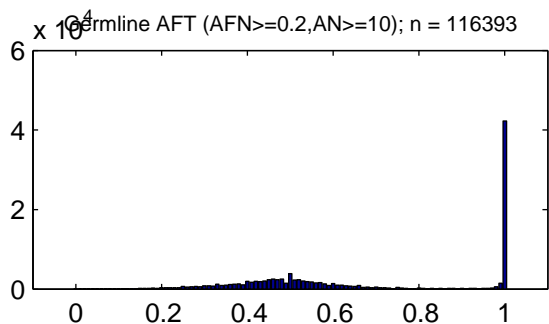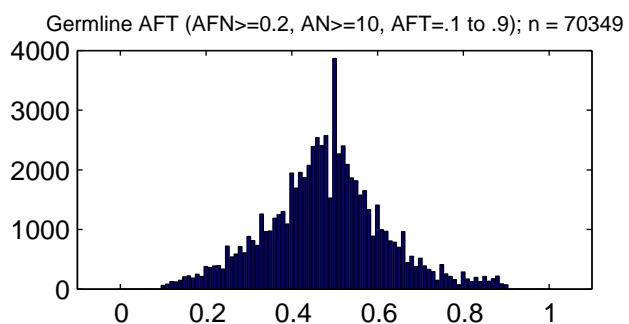

431\_ucsc.edu\_BRCA.IlluminaGA\_DNASeq.Level\_2.8.0.0 -- TCGA-AR-A0TS\_D

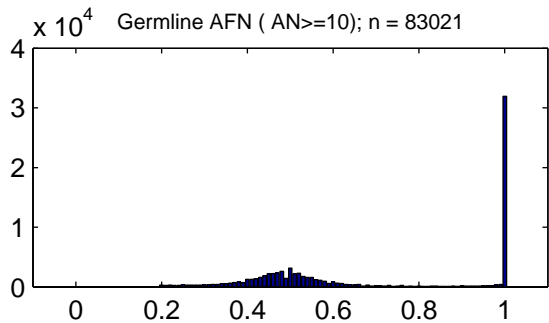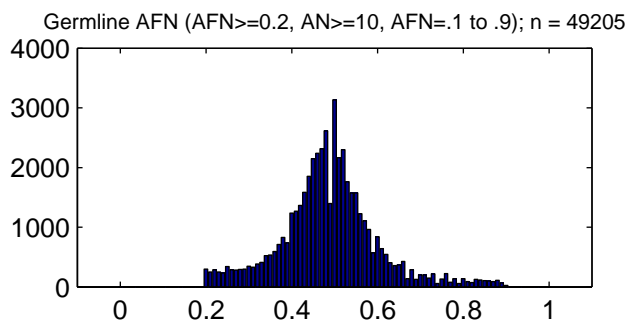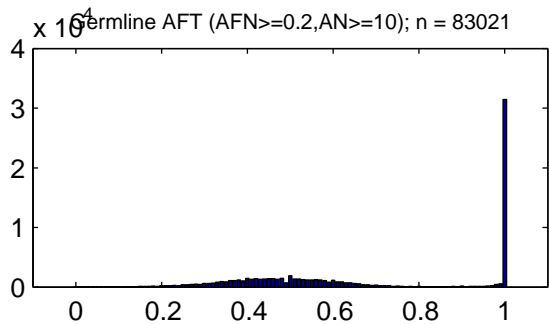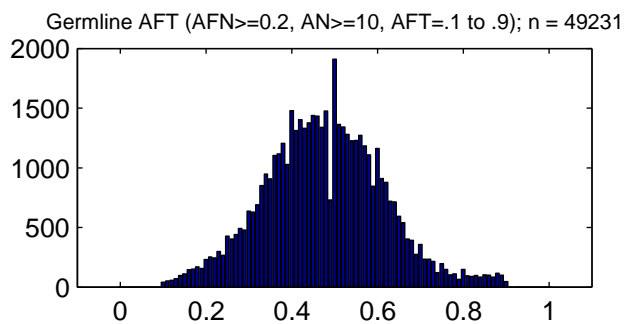



432\_ucsc.edu\_BRCA.IlluminaGA\_DNASeq.Level\_2.10.0.0 -- TCGA-BH-A0DQ\_I

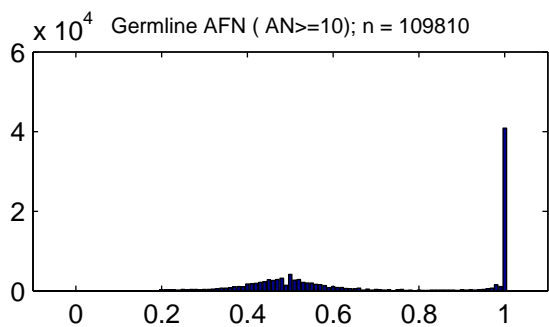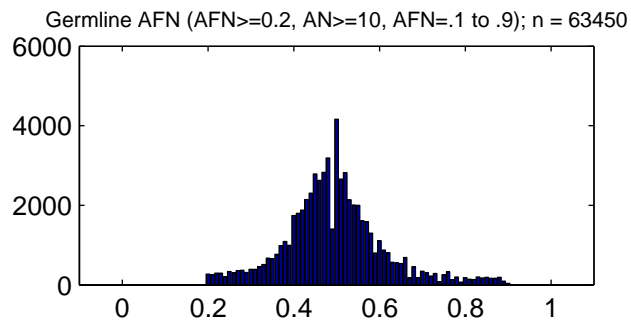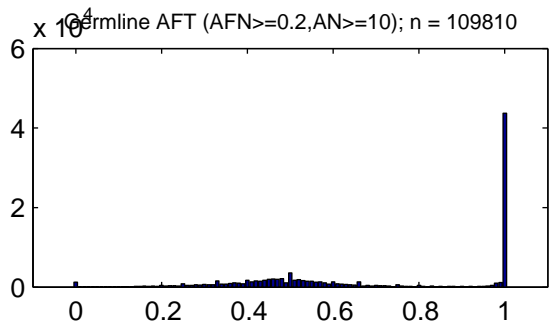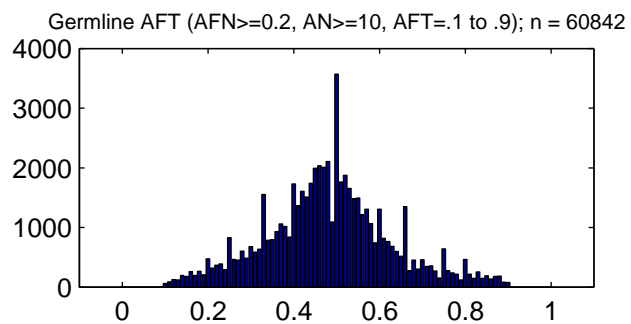

433\_ucsc.edu\_BRCA.IlluminaGA\_DNASeq.Level\_2.10.0.0 -- TCGA-BH-A0W7\_I

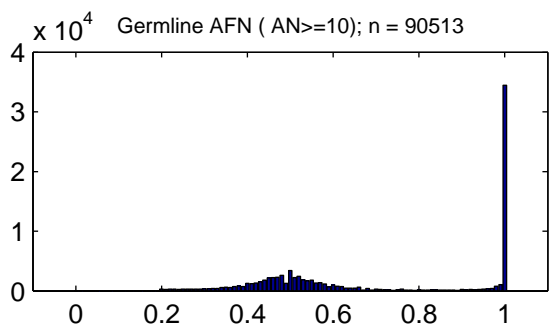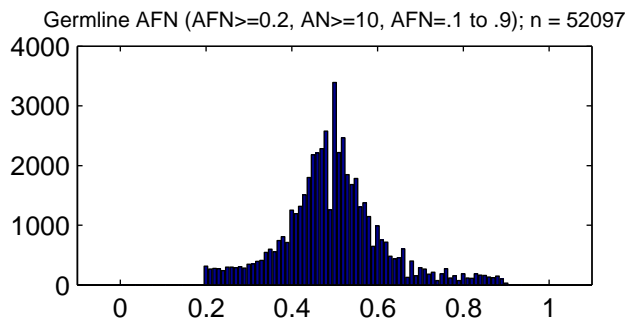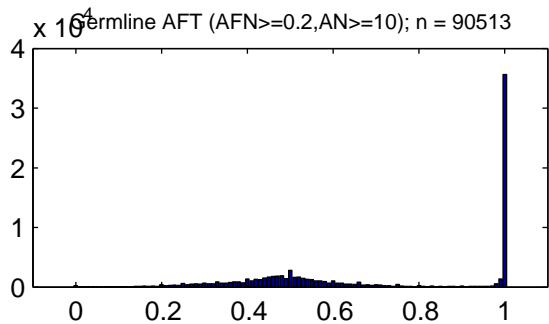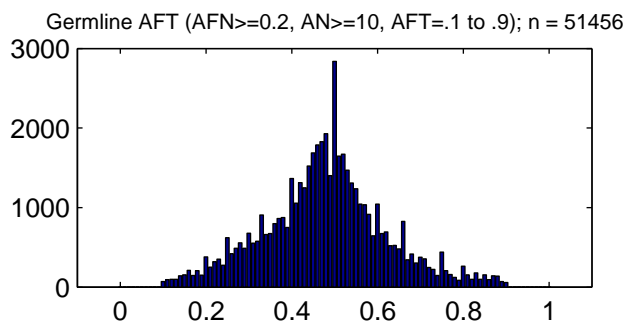

434\_ucsc.edu\_BRCA.IlluminaGA\_DNASeq.Level\_2.10.0.0 -- TCGA-BH-A18G\_C

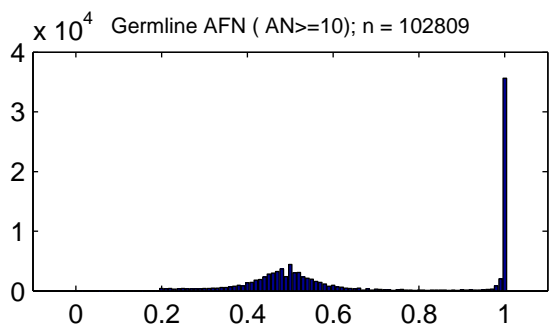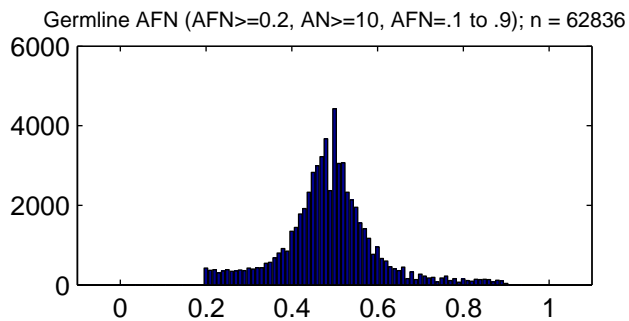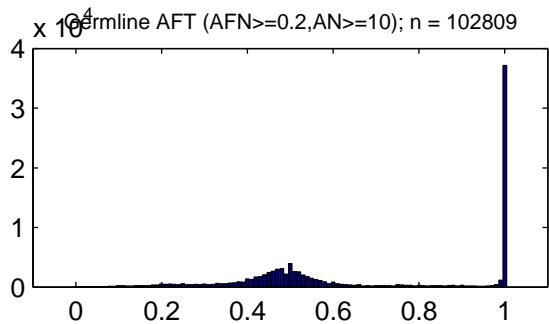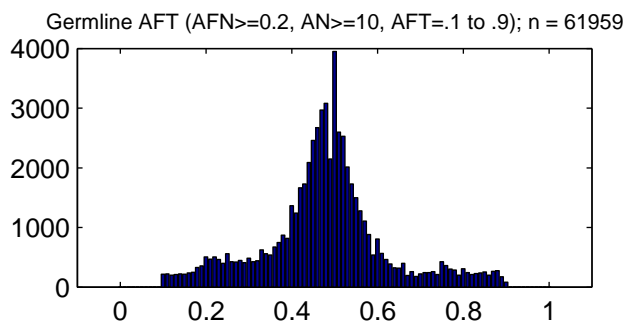

435\_ucsc.edu\_BRCA.IlluminaGA\_DNASeq.Level\_2.6.0.0 -- TCGA-AO-A12D\_D

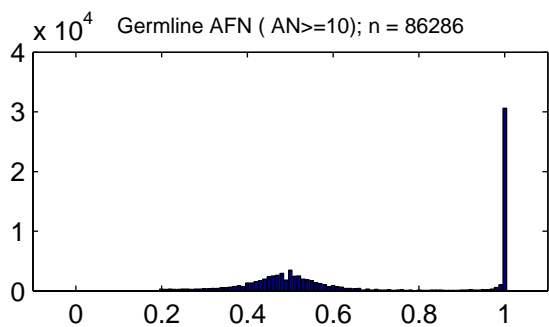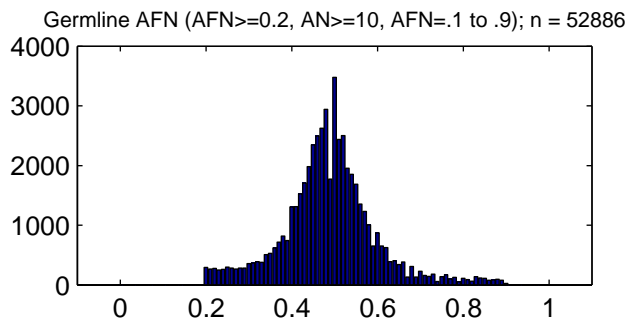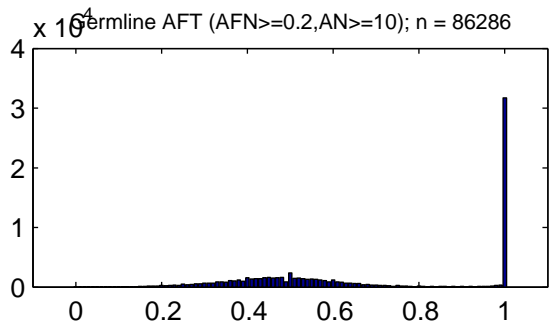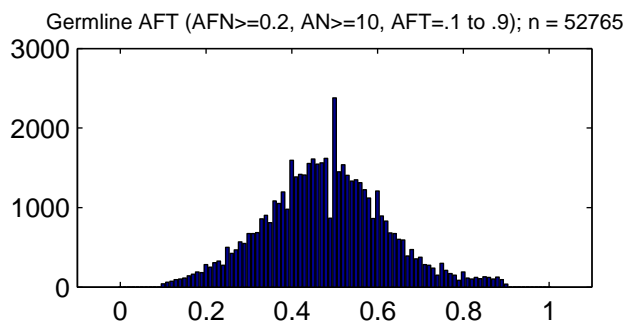

436\_ucsc.edu\_BRCA.IlluminaGA\_DNASeq.Level\_2.10.0.0 -- TCGA-BH-A0E1\_V

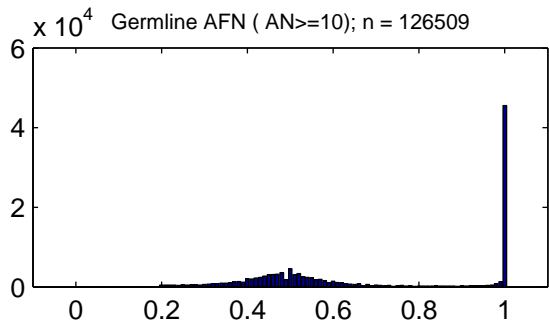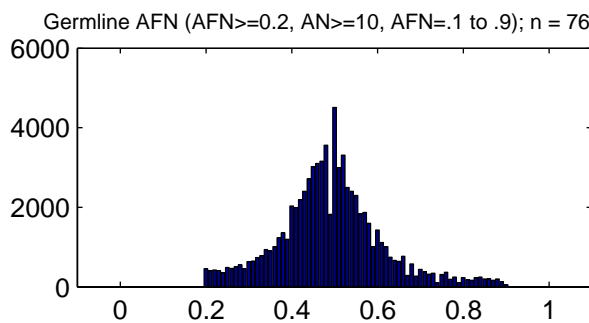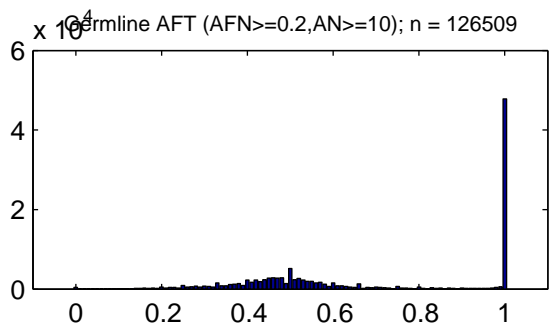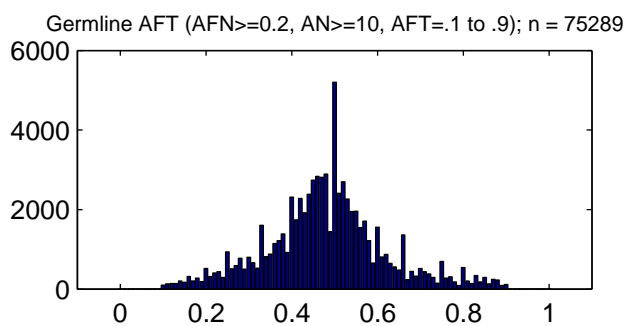

437\_ucsc.edu\_BRCA.IlluminaGA\_DNASeq.Level\_2.2.0.0 -- TCGA-A2-A0T4\_D

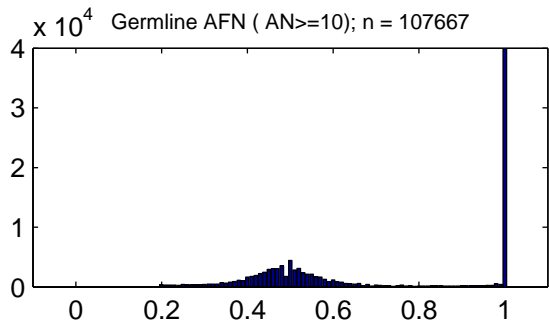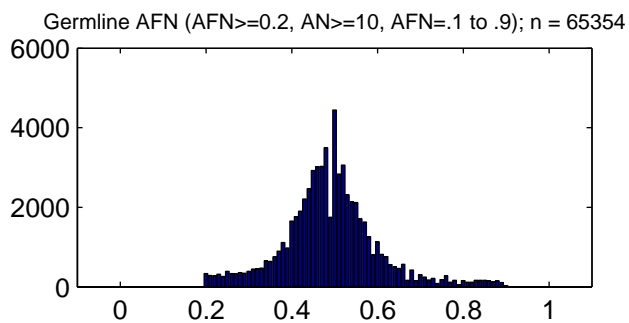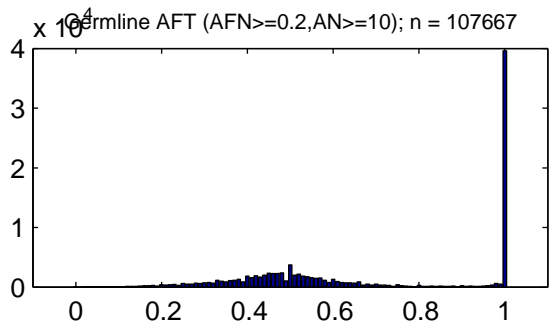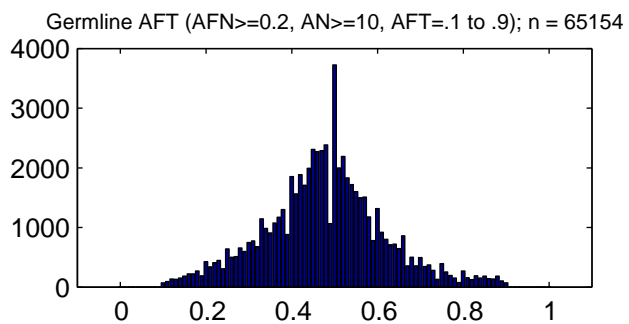

438\_ucsc.edu\_BRCA.IlluminaGA\_DNASeq.Level\_2.5.0.0 -- TCGA-AN-A0FN\_W

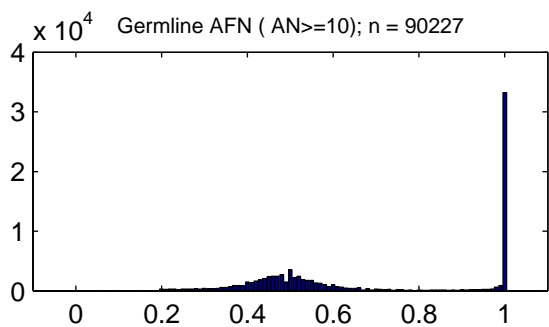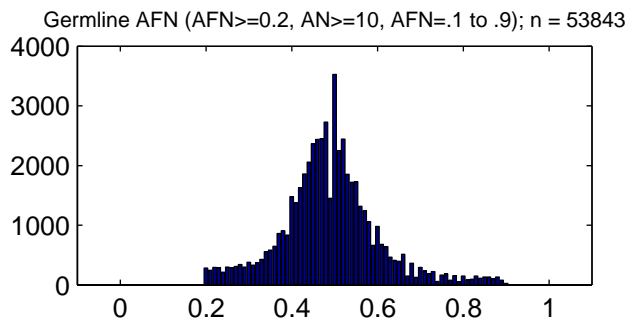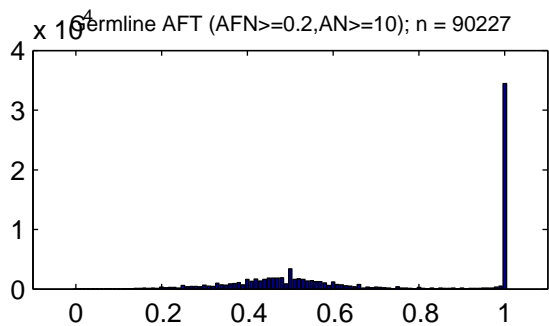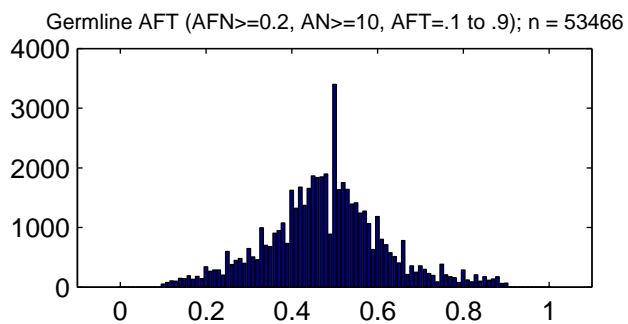

439\_ucsc.edu\_BRCA.IlluminaGA\_DNASeq.Level\_2.2.0.0 -- TCGA-A2-A0EX\_W

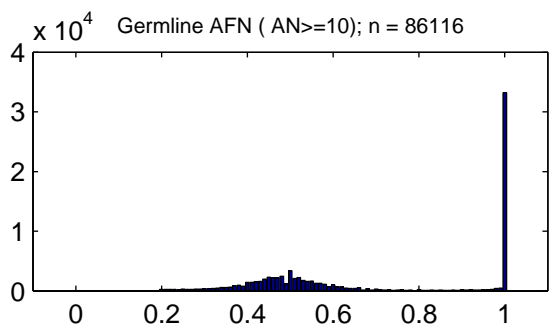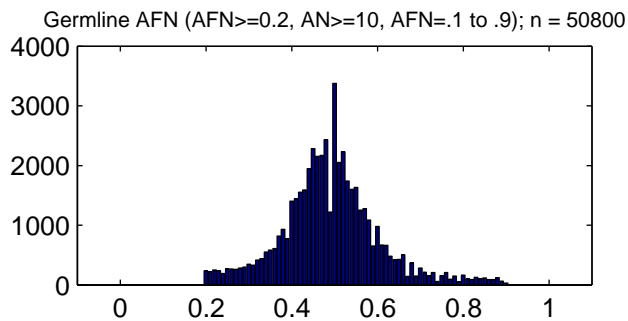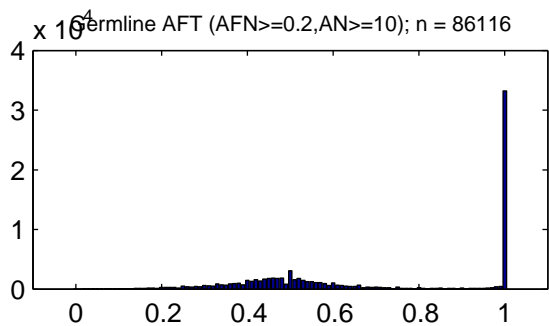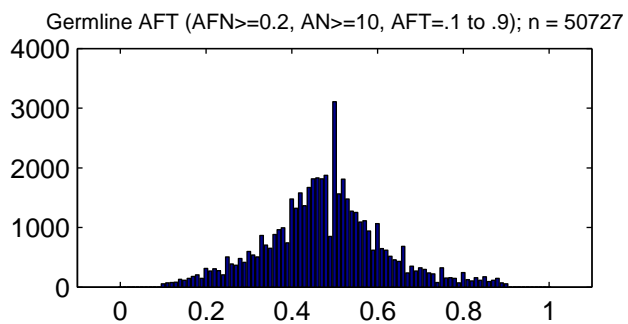



440\_ucsc.edu\_BRCA.IlluminaGA\_DNASeq.Level\_2.10.0.0 -- TCGA-BH-A18H\_C

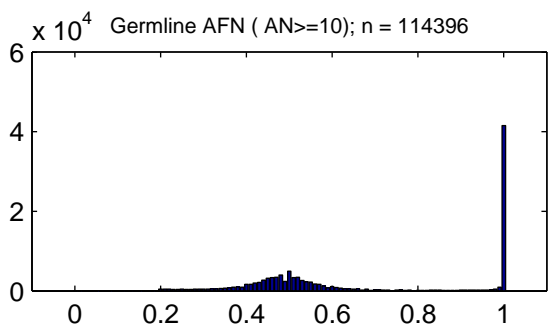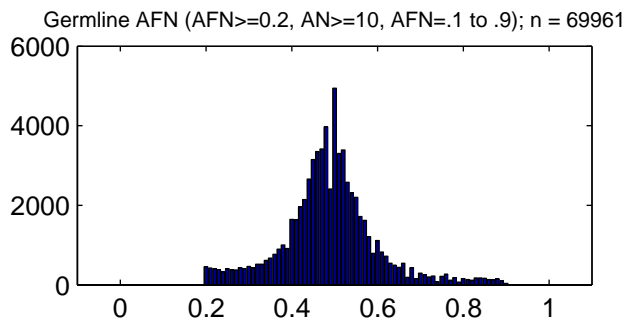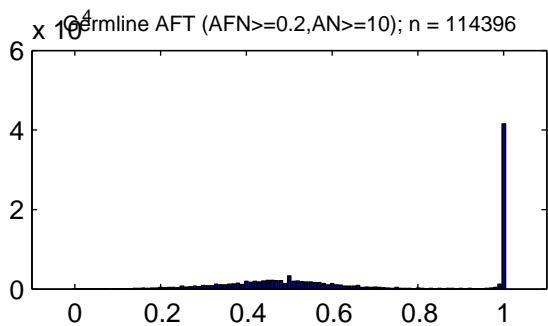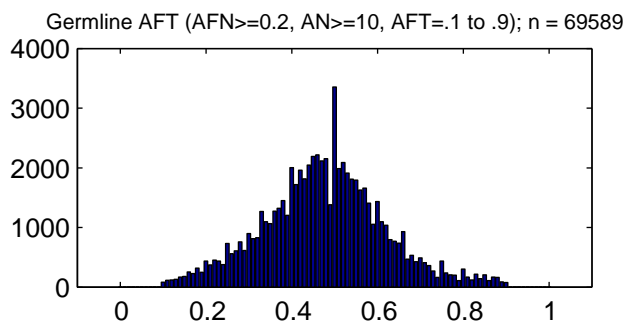

441\_ucsc.edu\_BRCA.IlluminaGA\_DNASeq.Level\_2.6.0.0 -- TCGA-AO-A0JC\_W

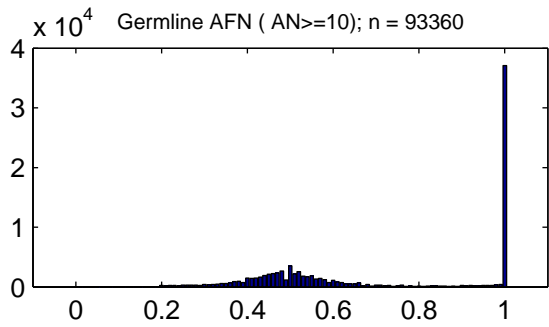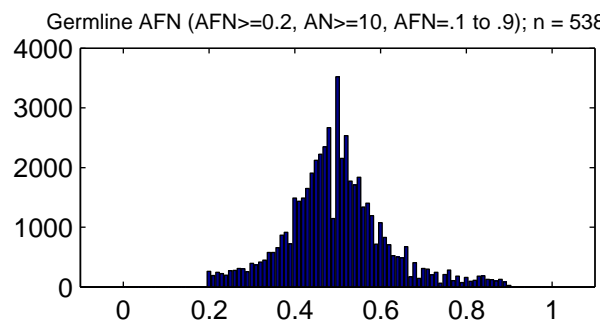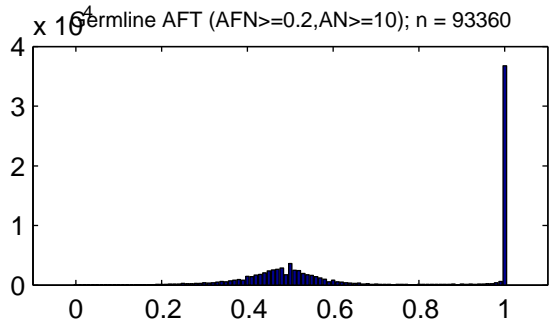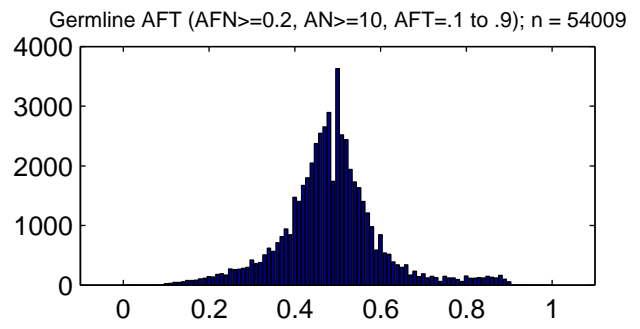

442\_ucsc.edu\_BRCA.IlluminaGA\_DNASeq.Level\_2.10.0.0 -- TCGA-BH-A0E7\_V

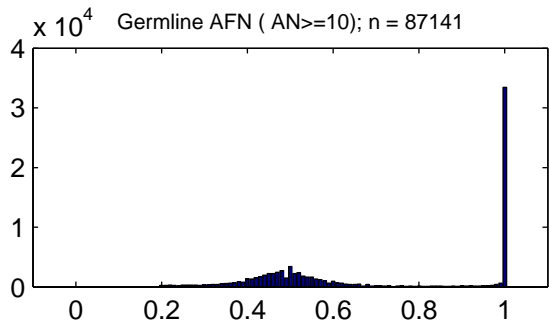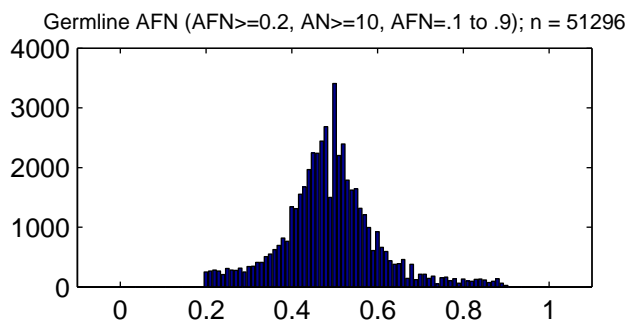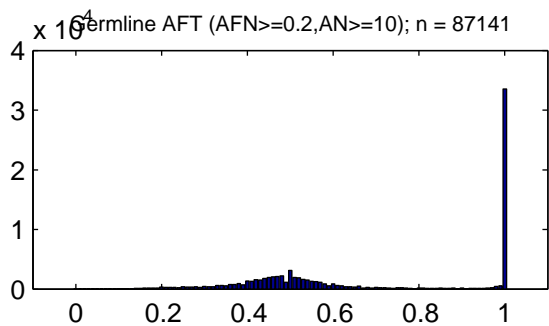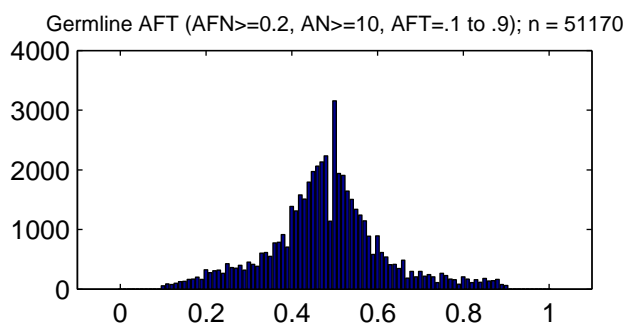

443\_ucsc.edu\_BRCA.IlluminaGA\_DNASeq.Level\_2.11.0.0 -- TCGA-C8-A132\_D

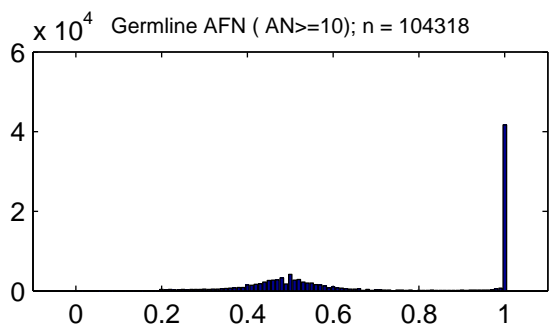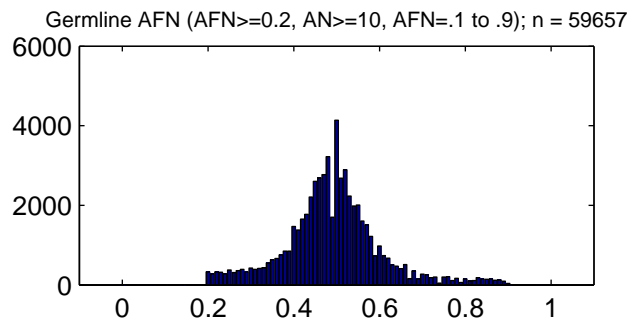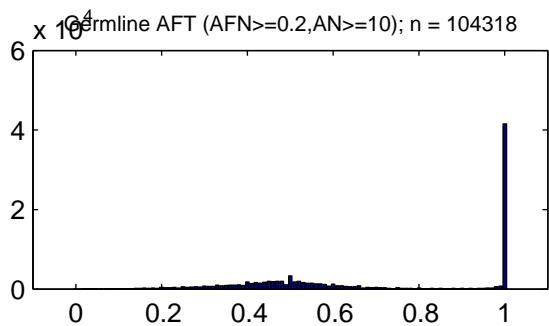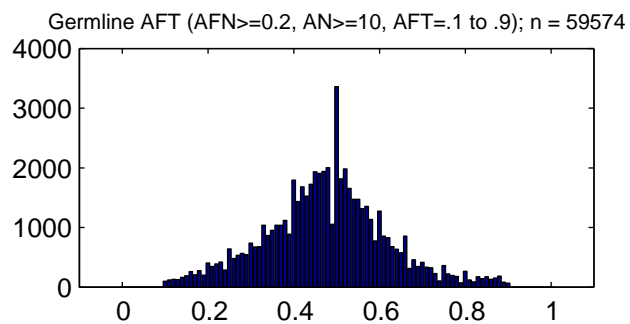

444\_ucsc.edu\_BRCA.IlluminaGA\_DNASeq.Level\_2.10.0.0 -- TCGA-BH-A0DI\_D

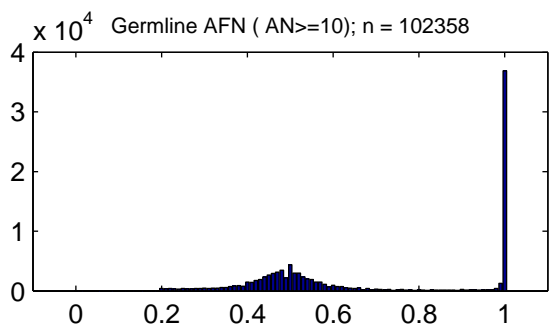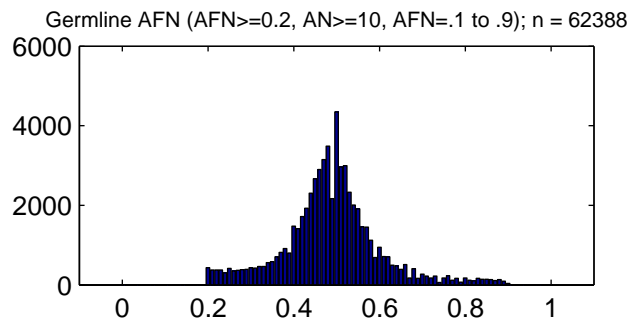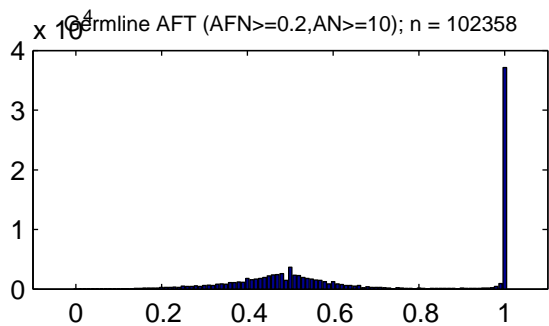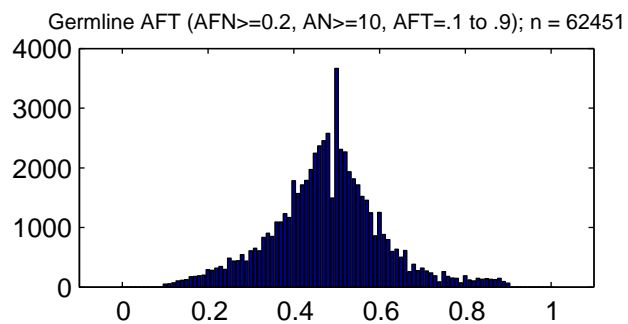

445\_ucsc.edu\_BRCA.IlluminaGA\_DNASeq.Level\_2.5.0.0 -- TCGA-AN-A0XP\_D

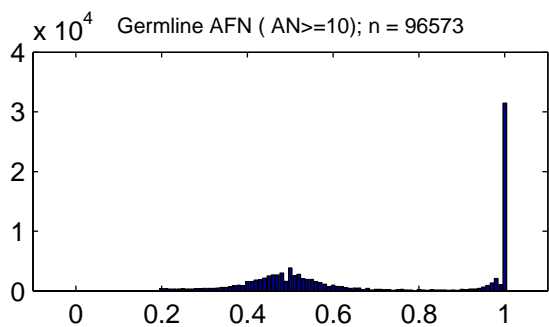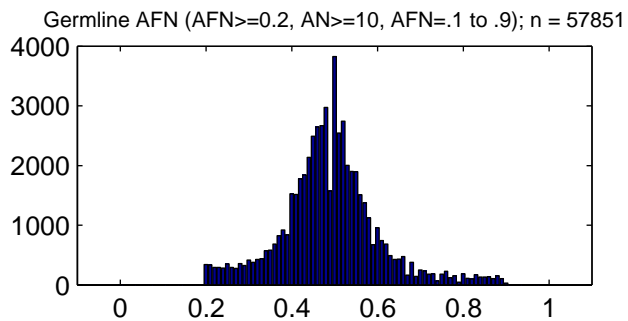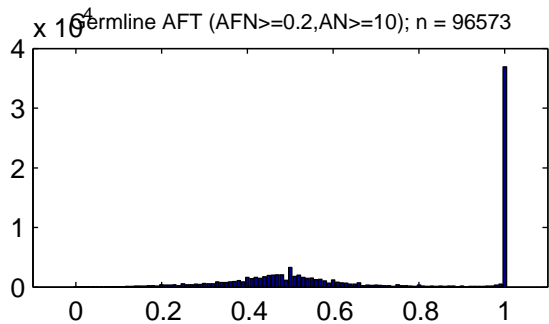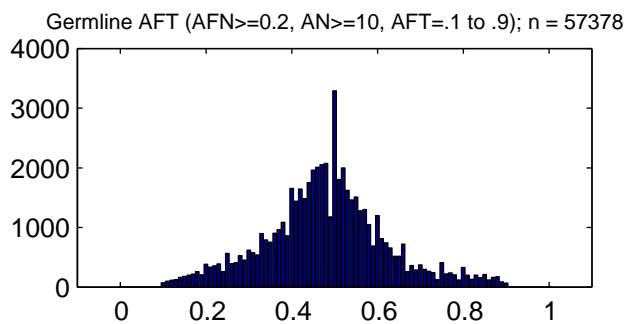

446\_ucsc.edu\_BRCA.IlluminaGA\_DNASeq.Level\_2.9.0.0 -- TCGA-B6-A0WS\_D

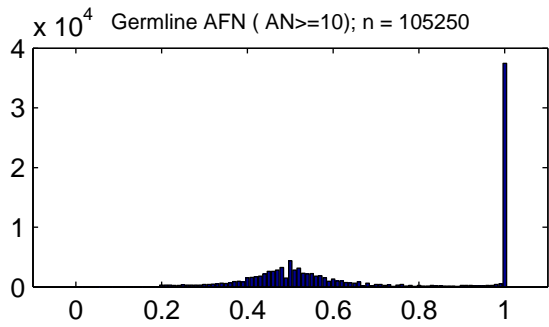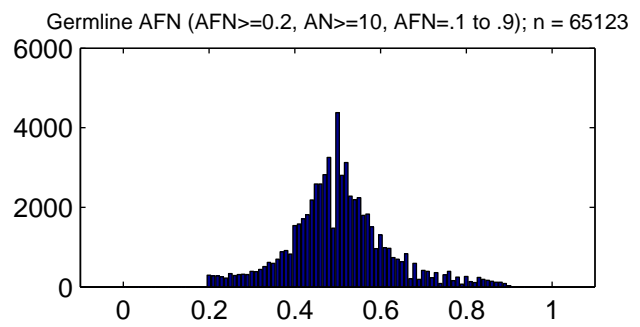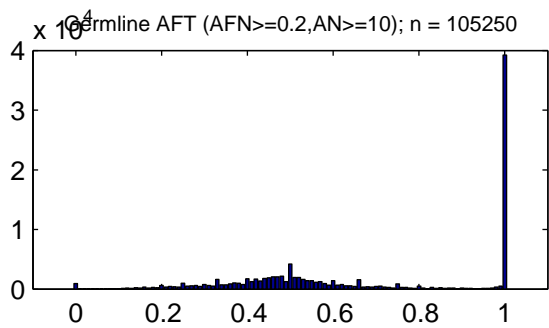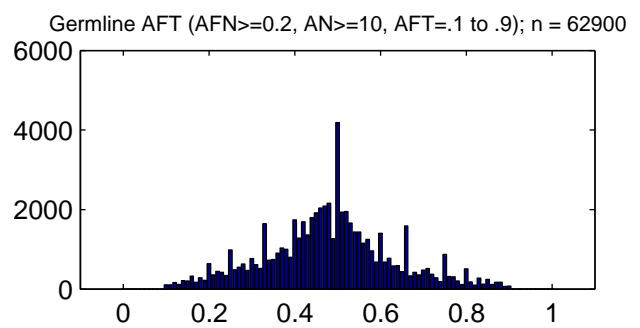

447\_ucsc.edu\_BRCA.IlluminaGA\_DNASeq.Level\_2.2.0.0 -- TCGA-A2-A0YC\_D

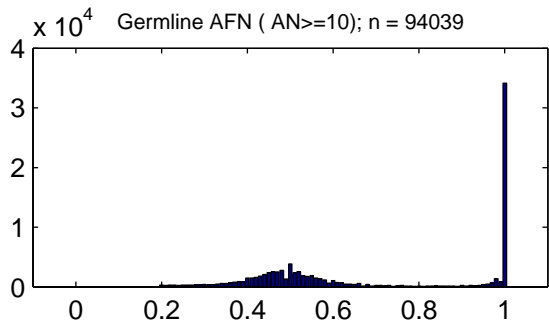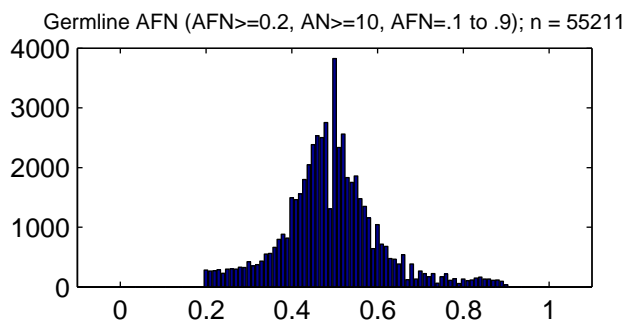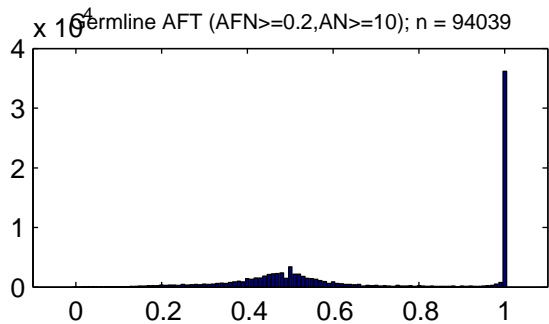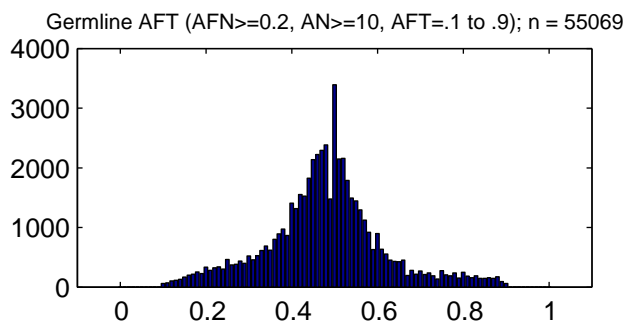



448\_ucsc.edu\_BRCA.IlluminaGA\_DNASeq.Level\_2.8.0.0 -- TCGA-AR-A0TQ\_D

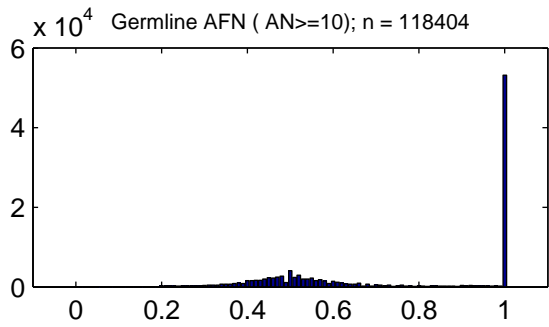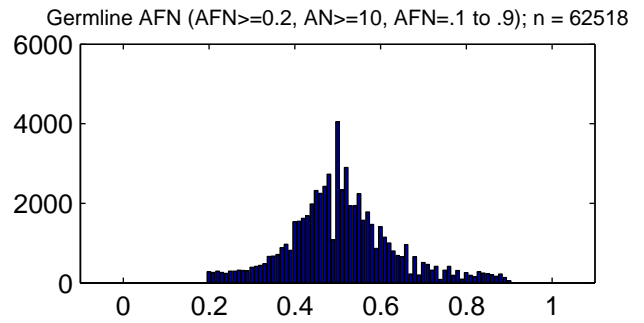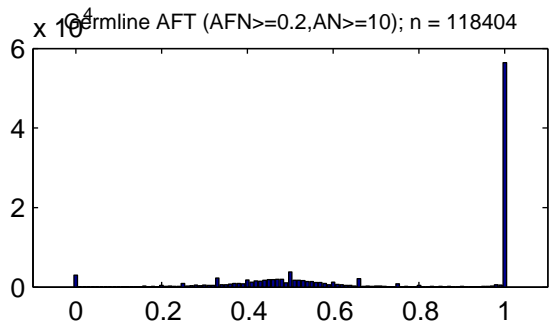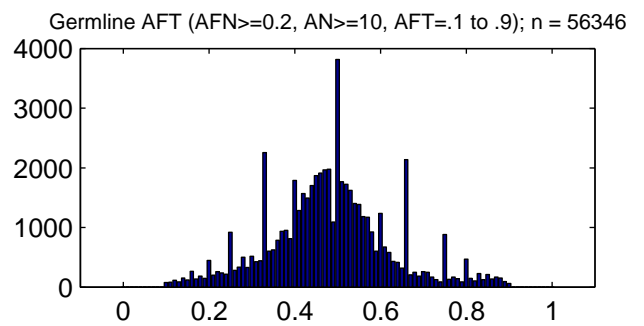

449\_ucsc.edu\_BRCA.IlluminaGA\_DNASeq.Level\_2.10.0.0 -- TCGA-BH-A0EB\_V

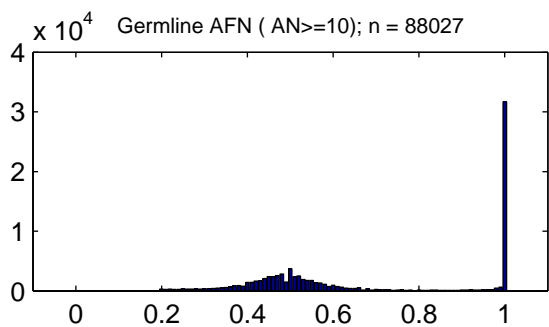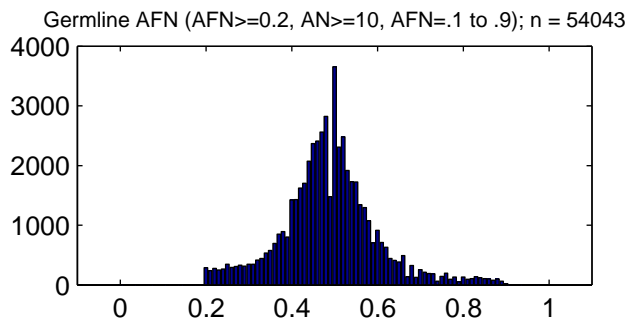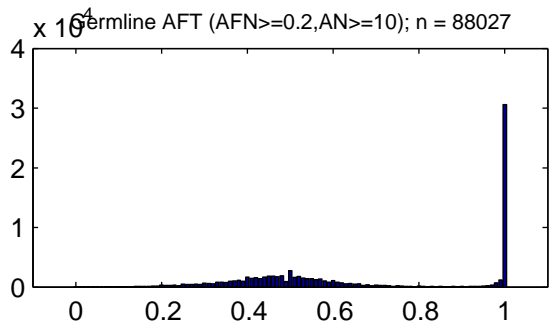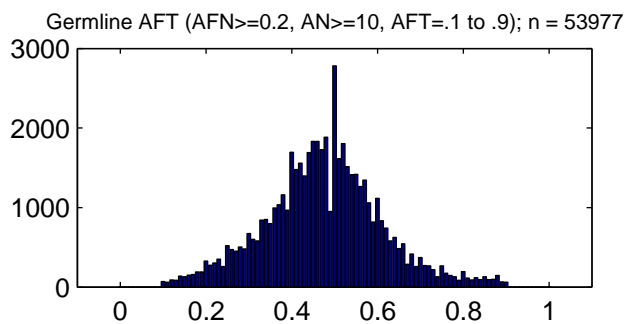

450\_ucsc.edu\_BRCA.IlluminaGA\_DNASeq.Level\_2.6.0.0 -- TCGA-AO-A0JF\_W

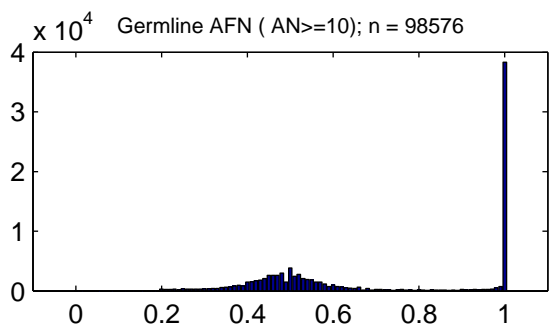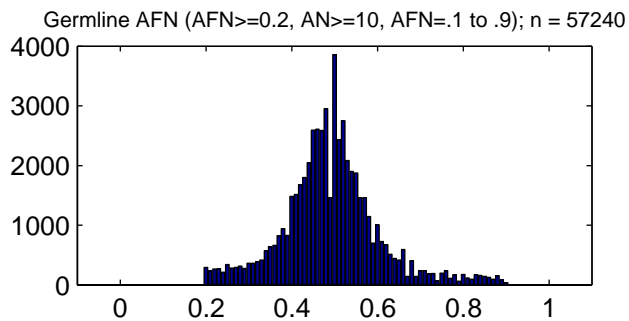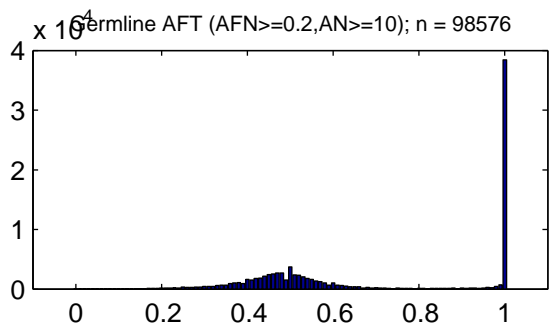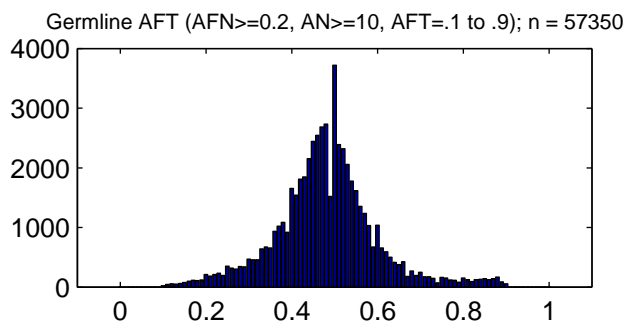

451\_ucsc.edu\_BRCA.IlluminaGA\_DNASeq.Level\_2.2.0.0 -- TCGA-A2-A0SU\_D

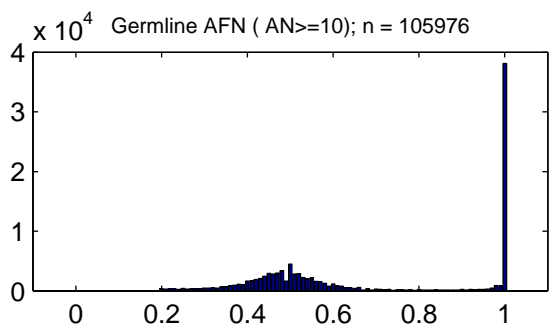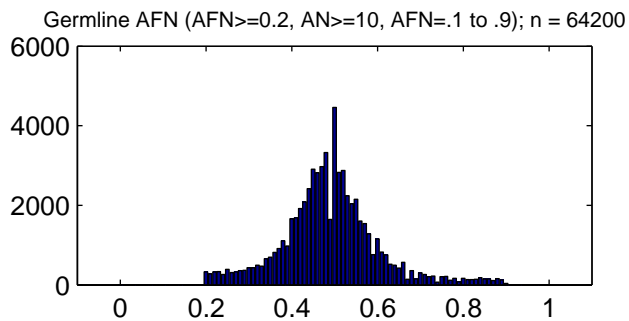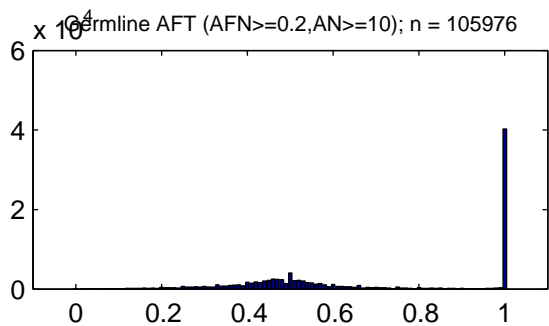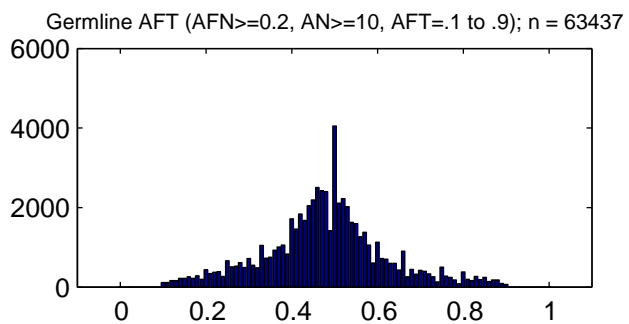

452\_ucsc.edu\_BRCA.IlluminaGA\_DNASeq.Level\_2.10.0.0 --- TCGA-BH-A1F0\_C

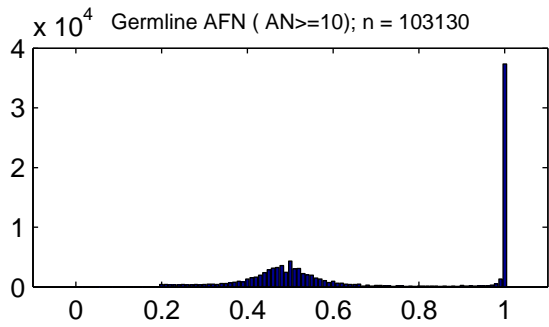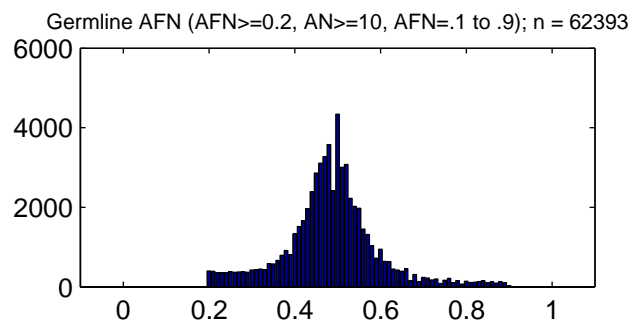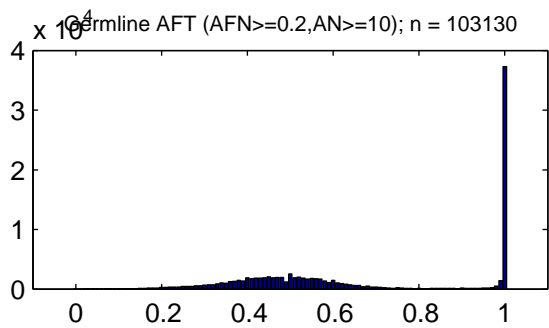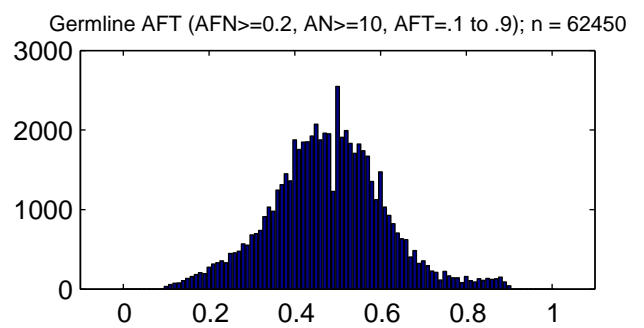

453\_ucsc.edu\_BRCA.IlluminaGA\_DNASeq.Level\_2.11.0.0 --- TCGA-C8-A12N\_C

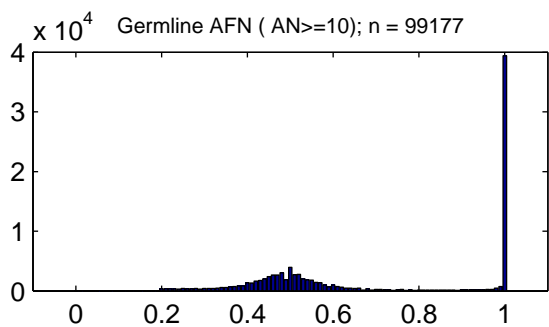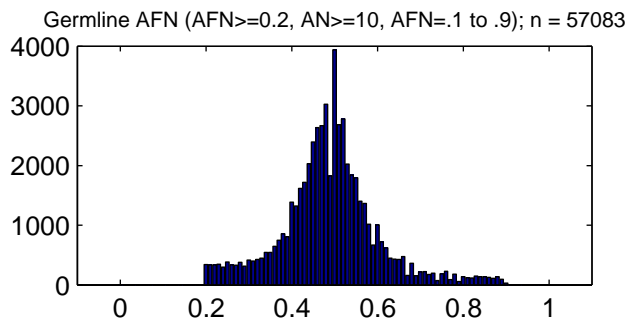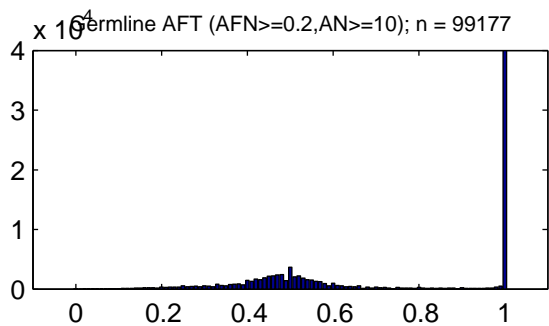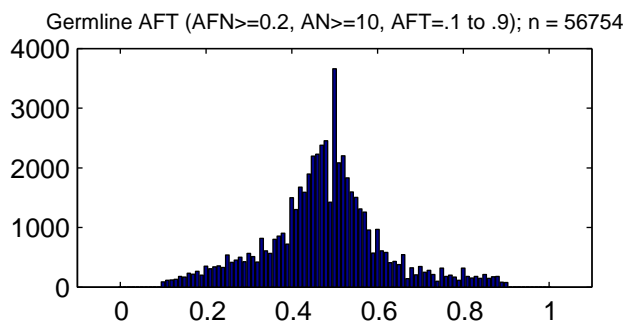

454\_ucsc.edu\_BRCA.IlluminaGA\_DNASeq.Level\_2.9.0.0 -- TCGA-B6-A0RN\_D

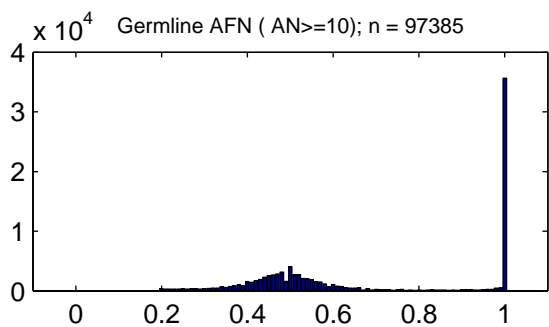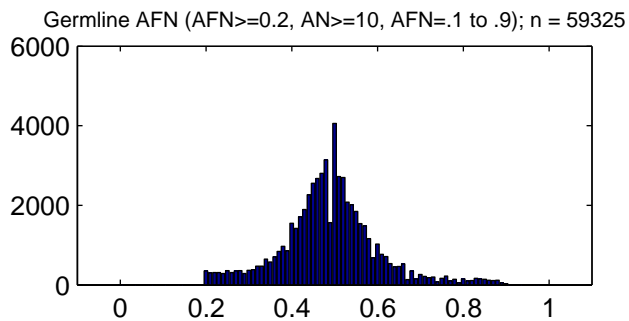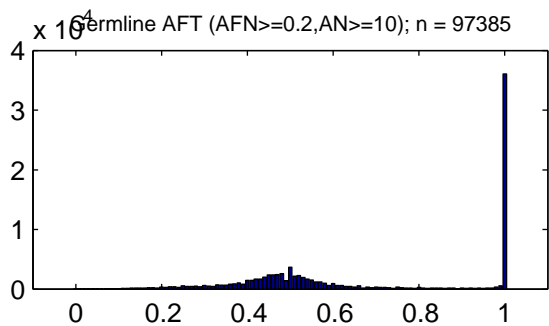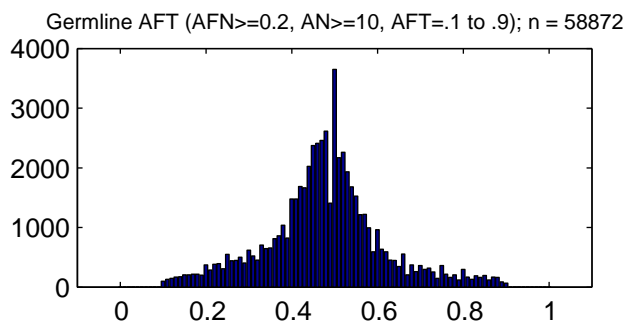

455\_ucsc.edu\_BRCA.IlluminaGA\_DNASeq.Level\_2.10.0.0 -- TCGA-BH-A0EI\_D

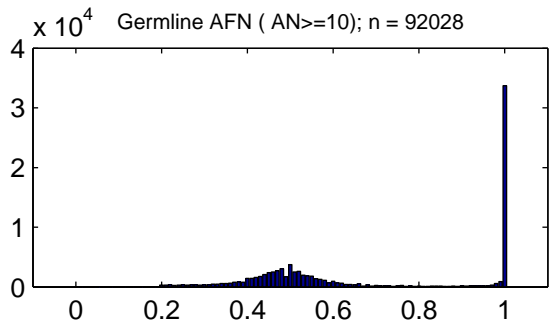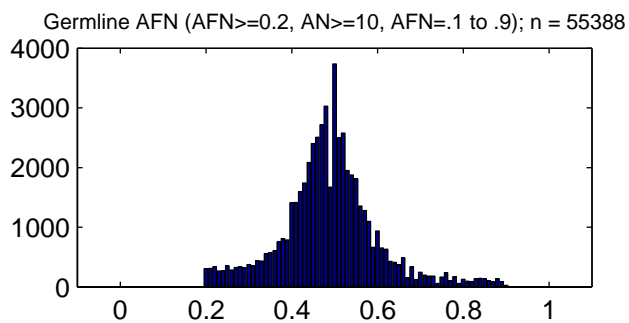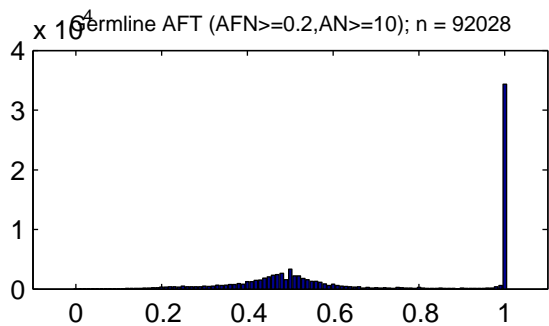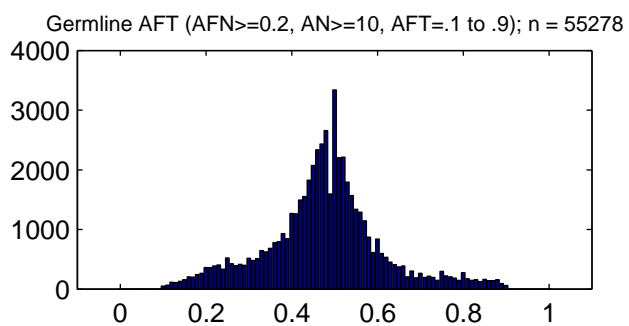



456\_ucsc.edu\_BRCA.IlluminaGA\_DNASeq.Level\_2.10.0.0 -- TCGA-BH-A1ET\_C

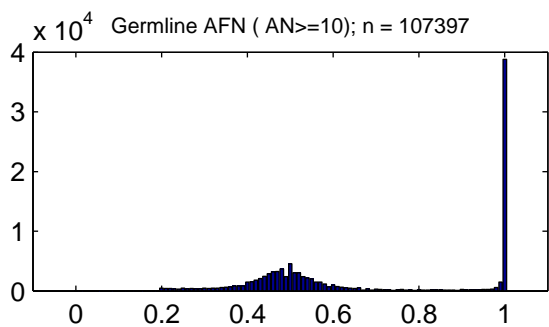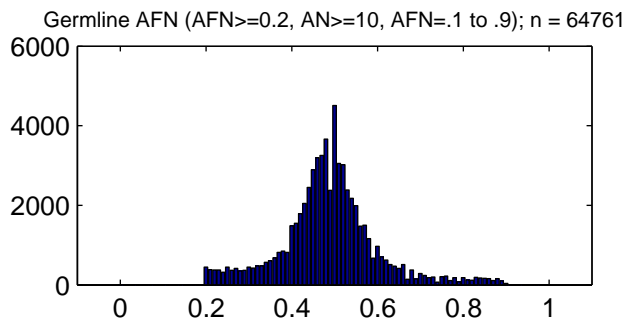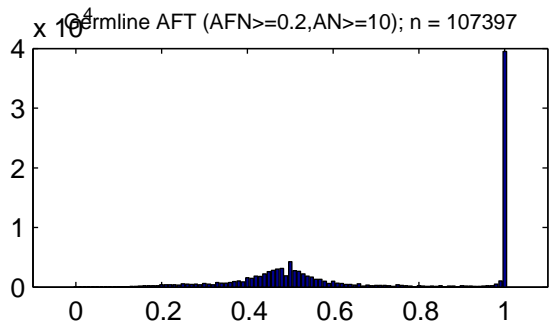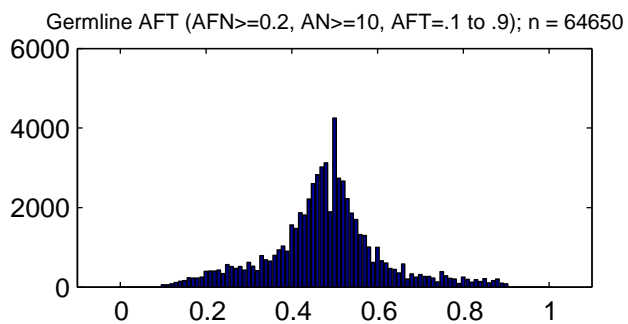

457\_ucsc.edu\_BRCA.IlluminaGA\_DNASeq.Level\_2.10.0.0 --- TCGA-BH-A18F\_C

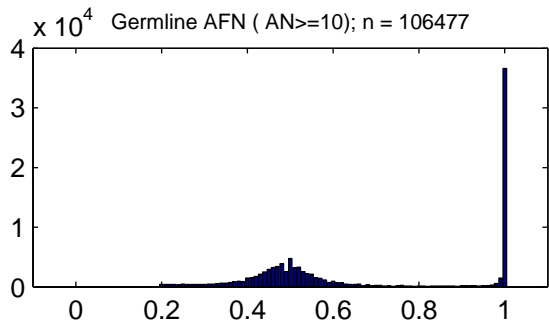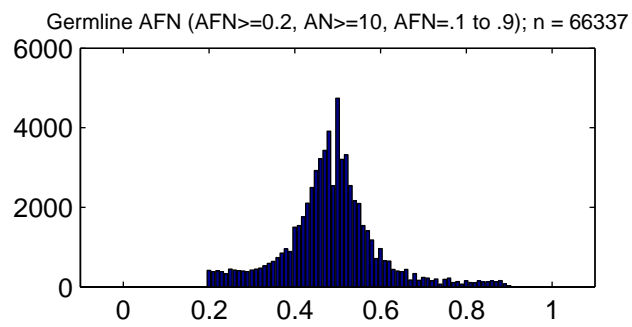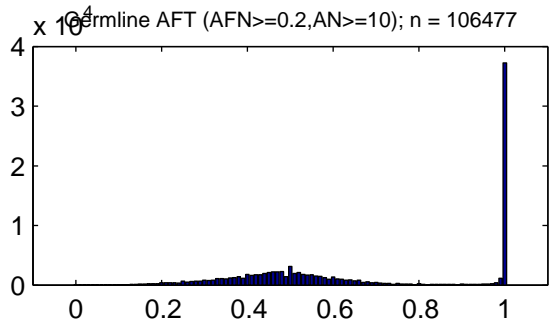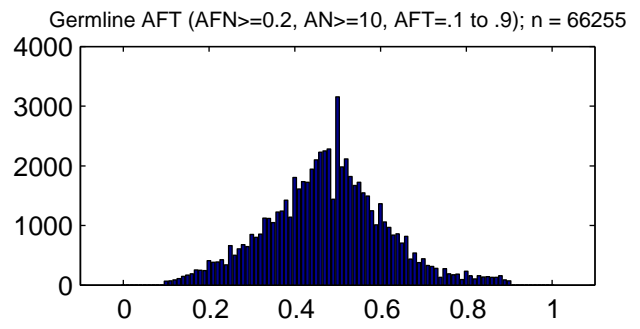

458\_ucsc.edu\_BRCA.IlluminaGA\_DNASeq.Level\_2.8.0.0 -- TCGA-AR-A1AO\_D

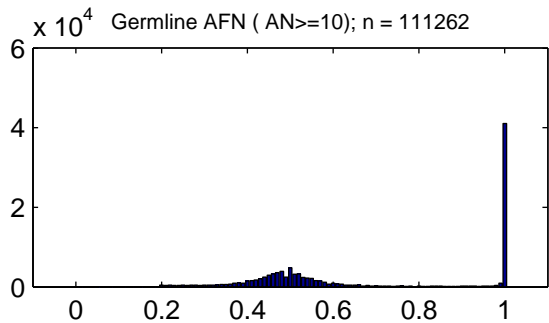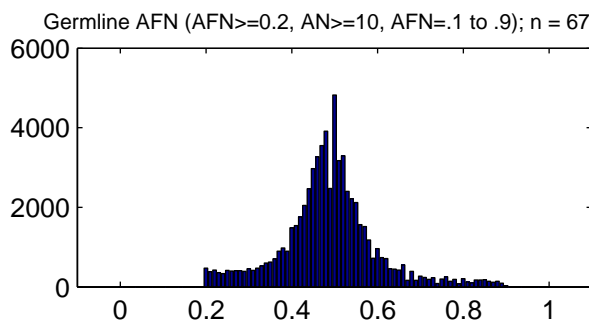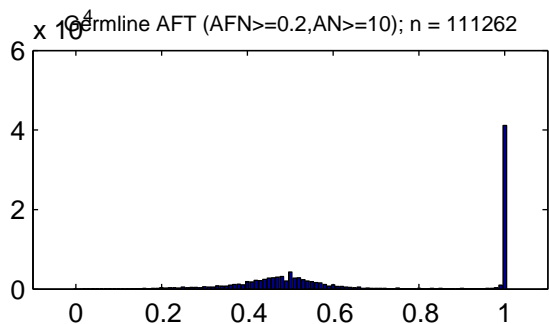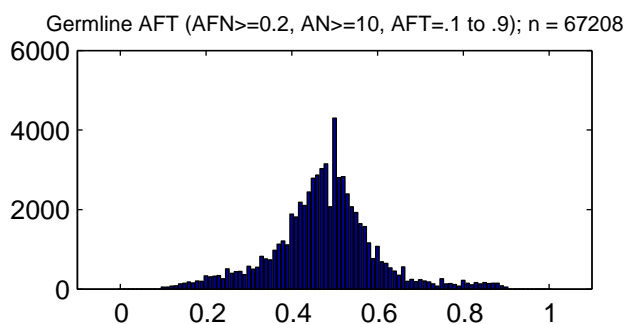

459\_ucsc.edu\_BRCA.IlluminaGA\_DNASeq.Level\_2.10.0.0 -- TCGA-BH-A0DE\_I

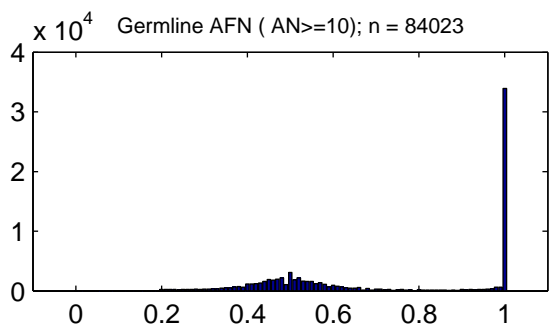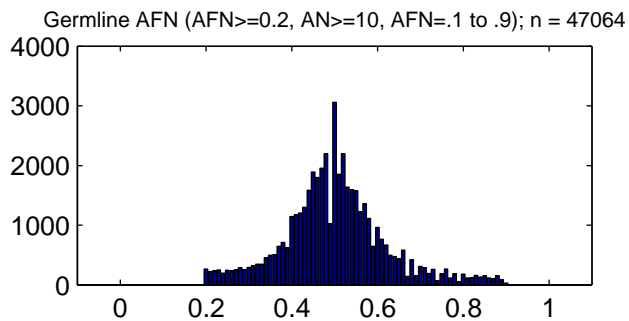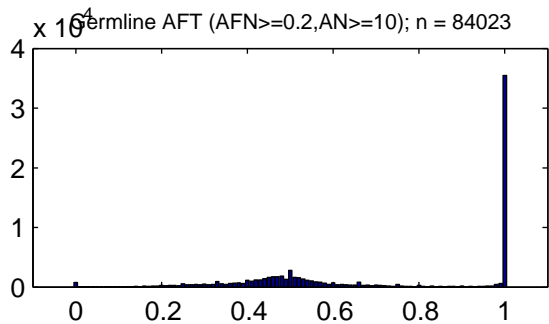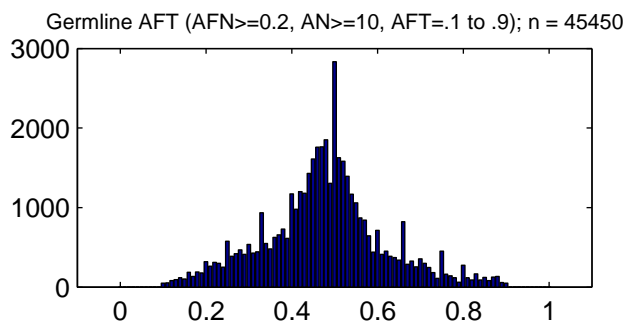

460\_ucsc.edu\_BRCA.IlluminaGA\_DNASeq.Level\_2.13.0.0 -- TCGA-E2-A15J\_D

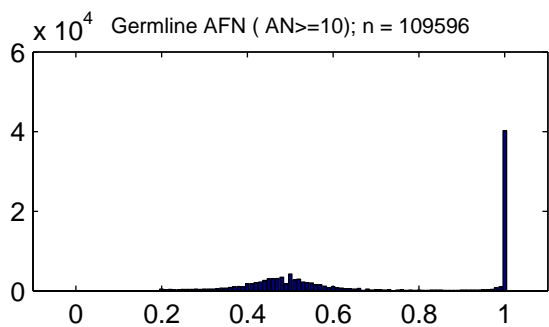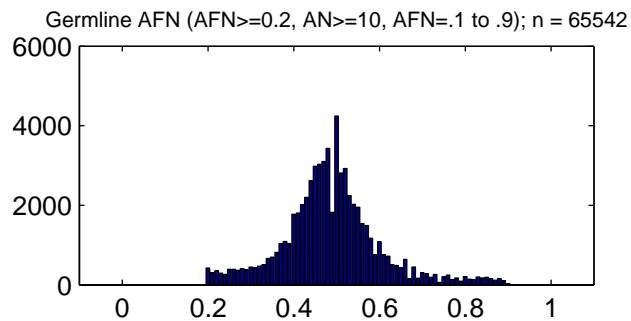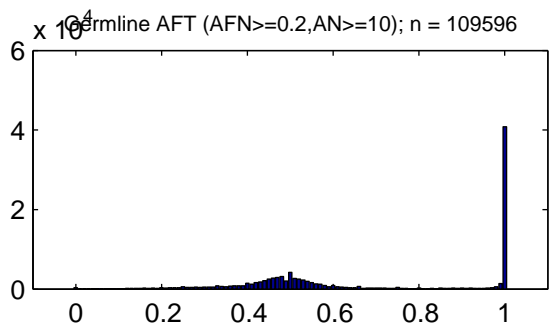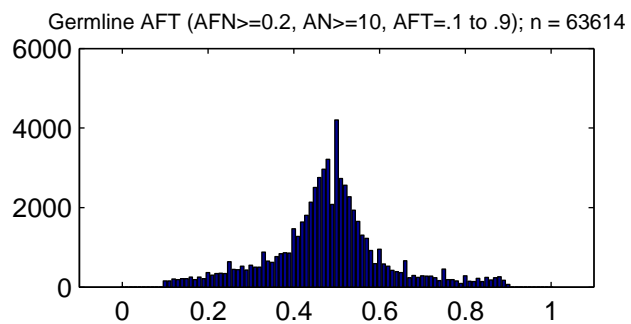

461\_ucsc.edu\_BRCA.IlluminaGA\_DNASeq.Level\_2.8.0.0 -- TCGA-AR-A1AL\_D

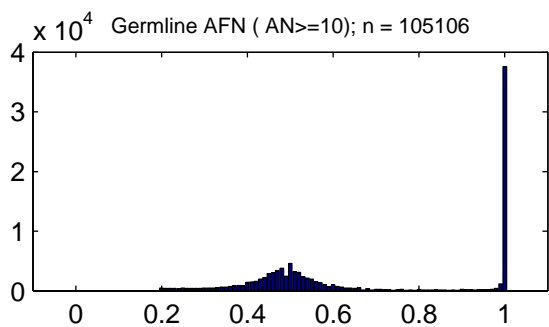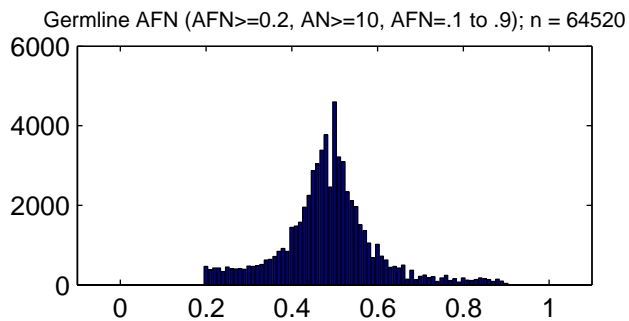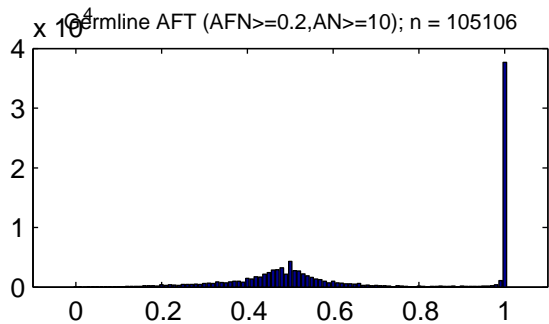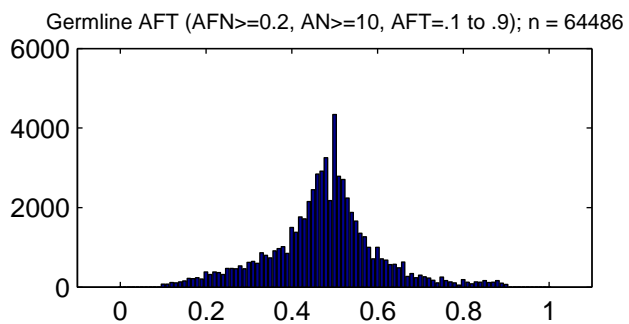

462\_ucsc.edu\_BRCA.IlluminaGA\_DNASeq.Level\_2.8.0.0 -- TCGA-AR-A1AT\_D

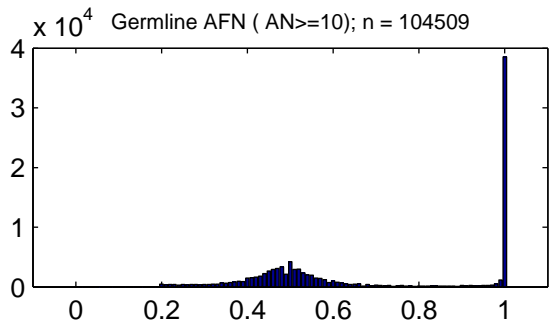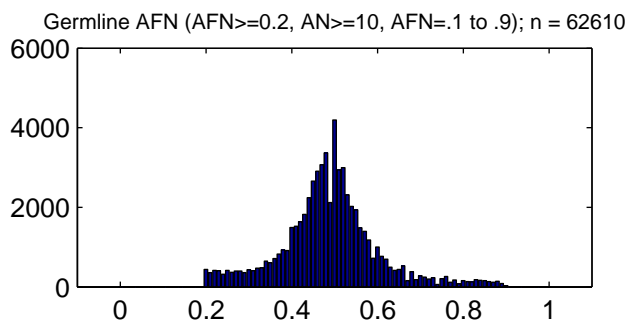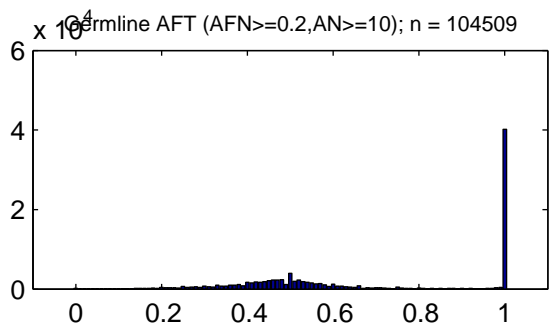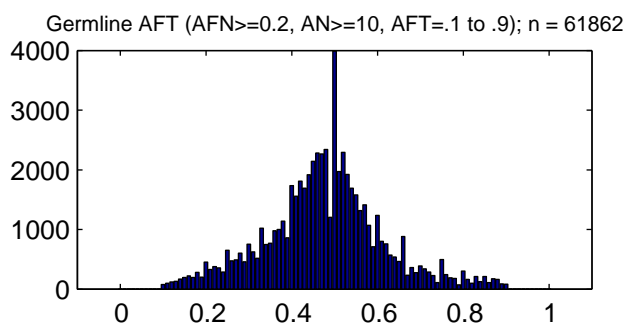

463\_ucsc.edu\_BRCA.IlluminaGA\_DNASeq.Level\_2.10.0.0 -- TCGA-BH-A0W4\_I

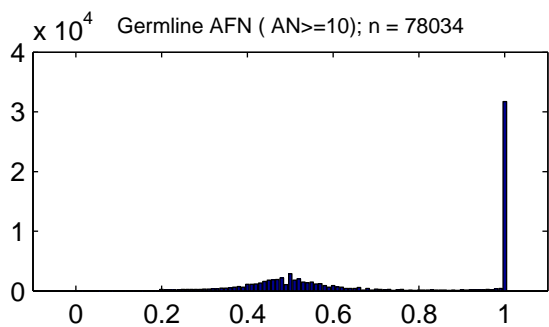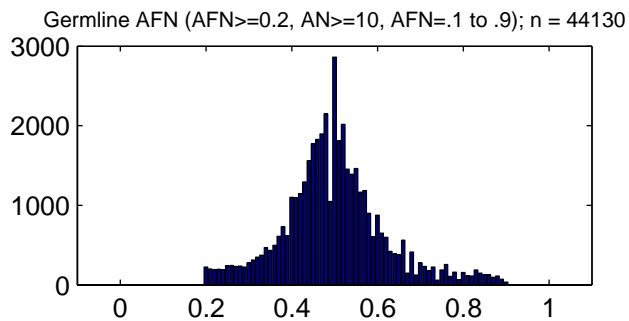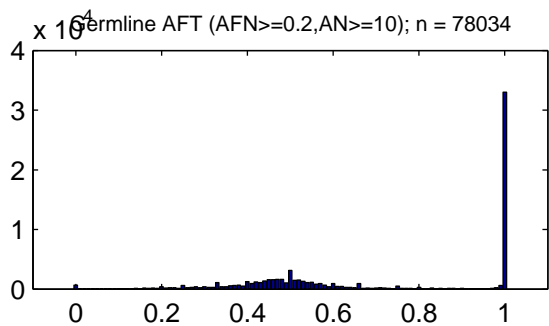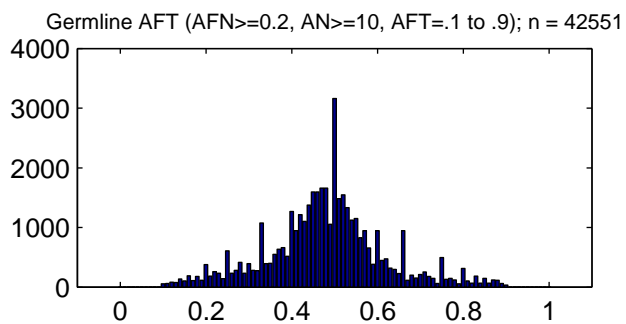



464\_ucsc.edu\_BRCA.IlluminaGA\_DNASeq.Level\_2.2.0.0 -- TCGA-A2-A0ST\_D

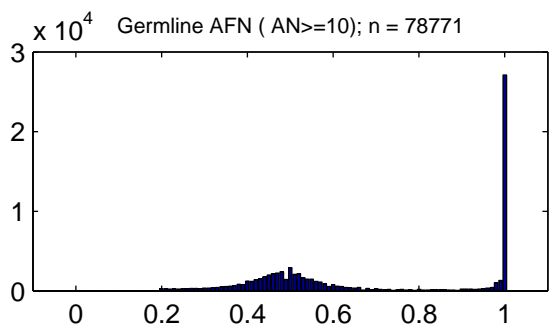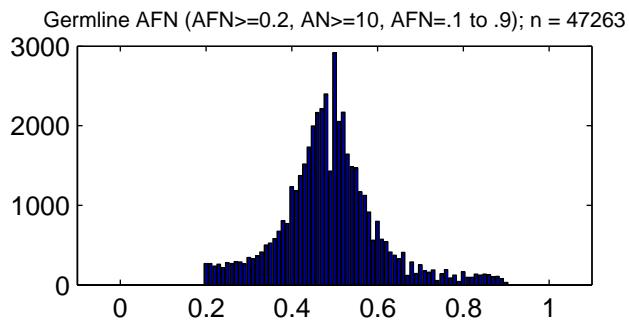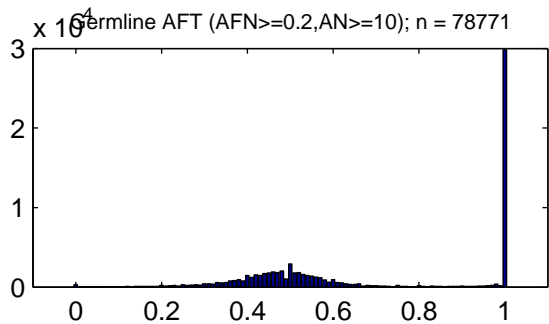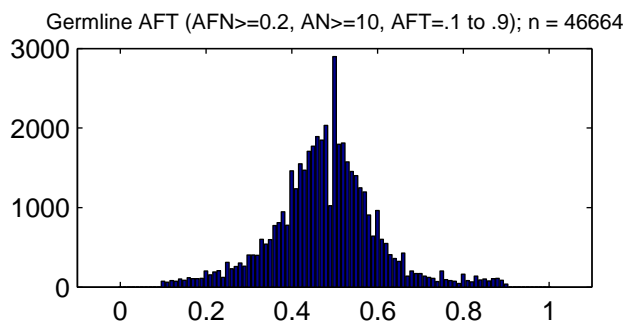

465\_ucsc.edu\_BRCA.IlluminaGA\_DNASeq.Level\_2.13.0.0 --- TCGA-E2-A15G\_C

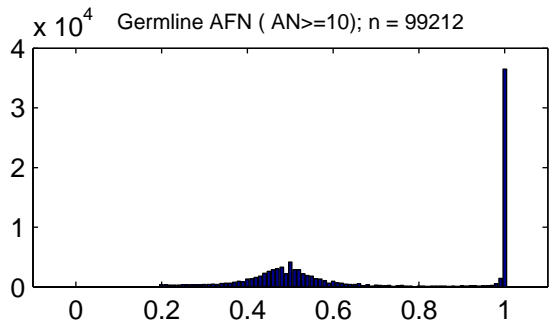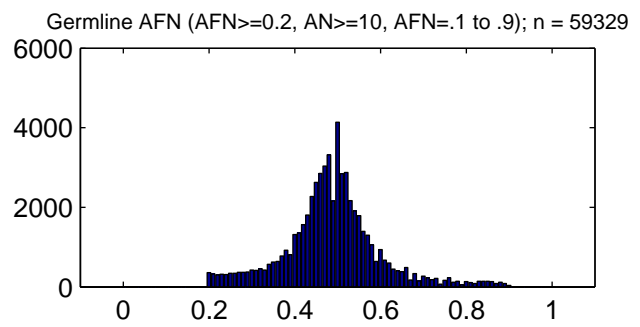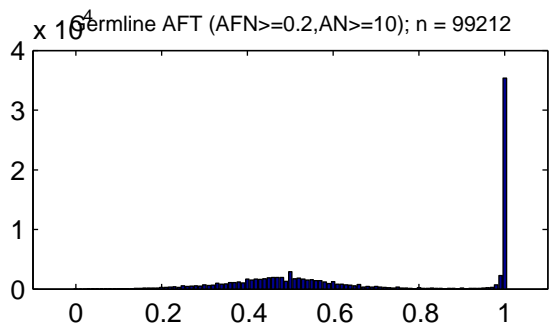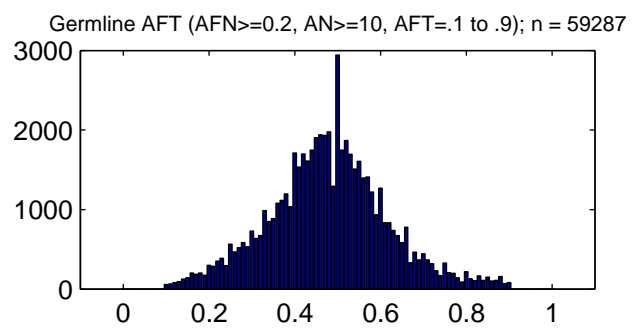

466\_ucsc.edu\_BRCA.IlluminaGA\_DNASeq.Level\_2.9.0.0 -- TCGA-B6-A0X0\_D

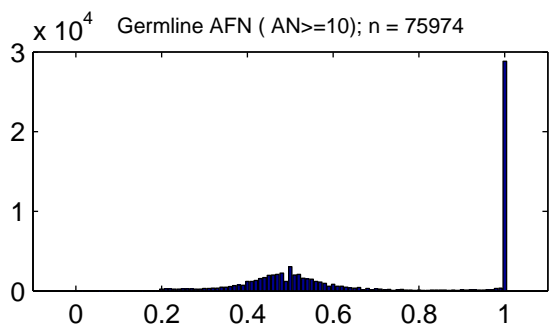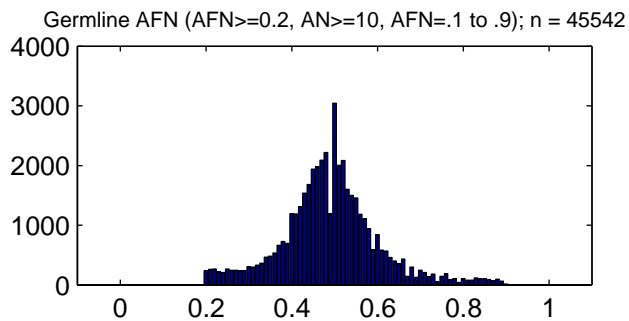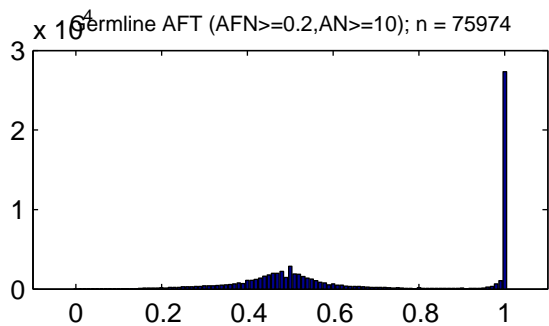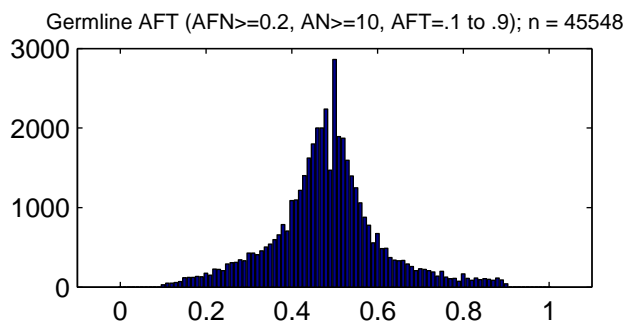

467\_ucsc.edu\_BRCA.IlluminaGA\_DNASeq.Level\_2.9.0.0 -- TCGA-B6-A0IC\_W

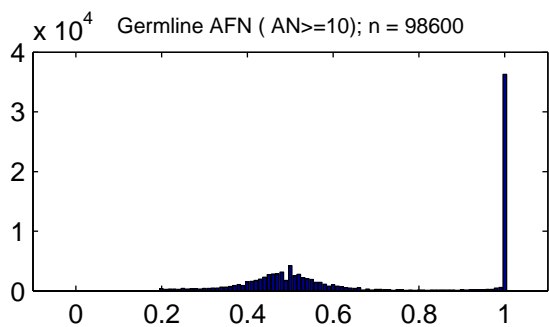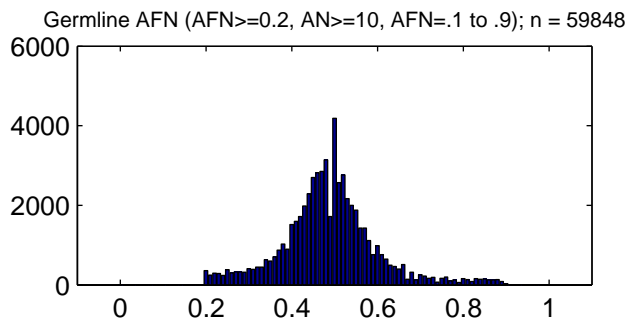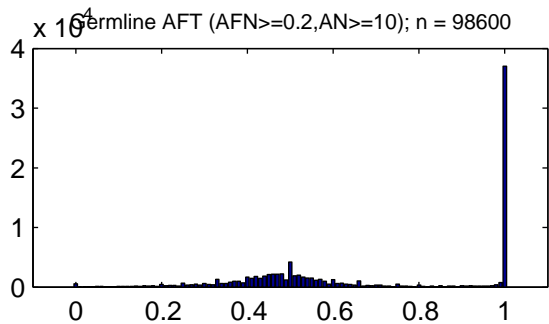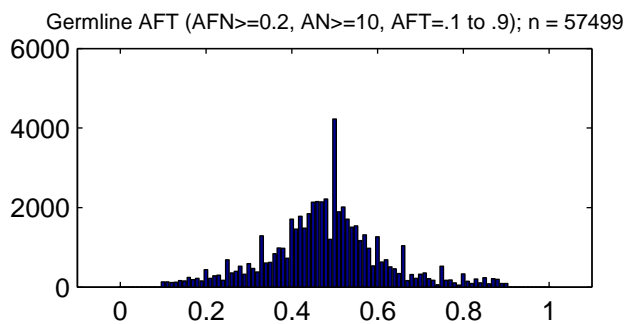

468\_ucsc.edu\_BRCA.IlluminaGA\_DNASeq.Level\_2.13.0.0 -- TCGA-E2-A1B1\_C

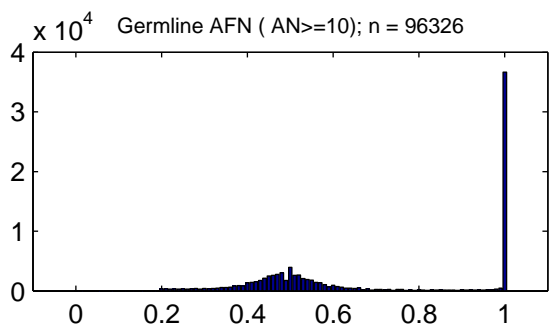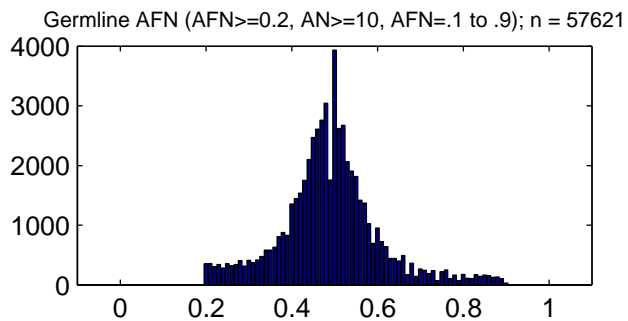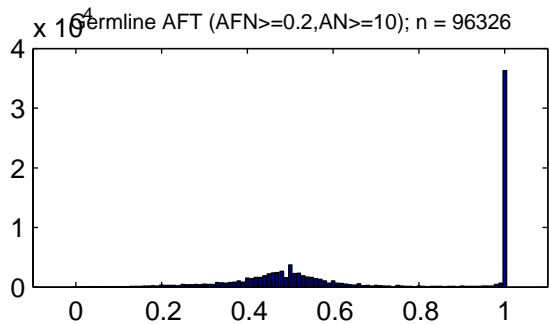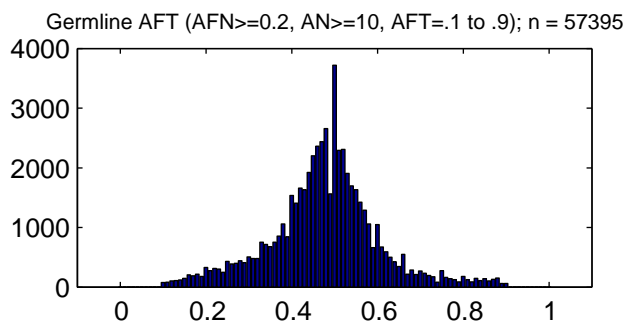

469\_ucsc.edu\_BRCA.IlluminaGA\_DNASeq.Level\_2.13.0.0 -- TCGA-E2-A153\_D

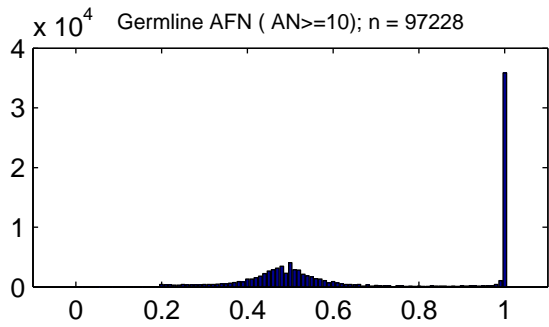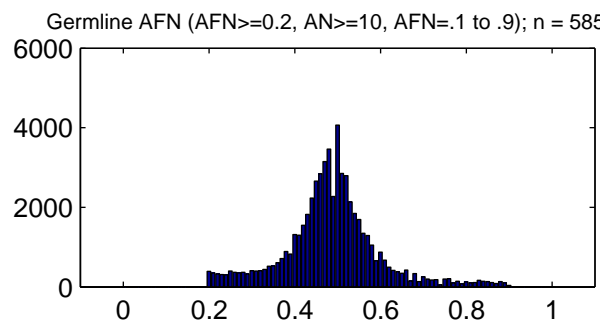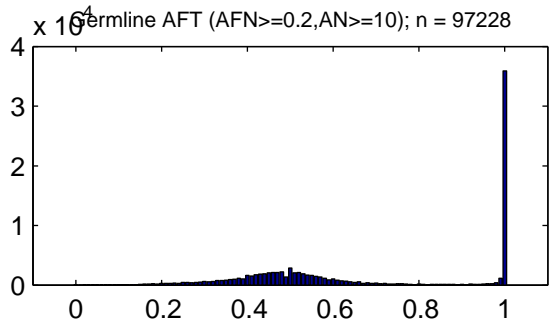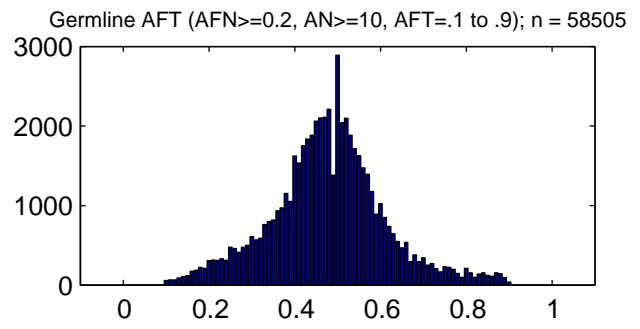

470\_ucsc.edu\_BRCA.IlluminaGA\_DNASeq.Level\_2.2.0.0 -- TCGA-A2-A0CZ\_W

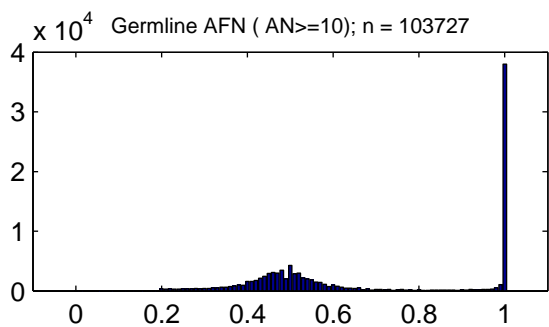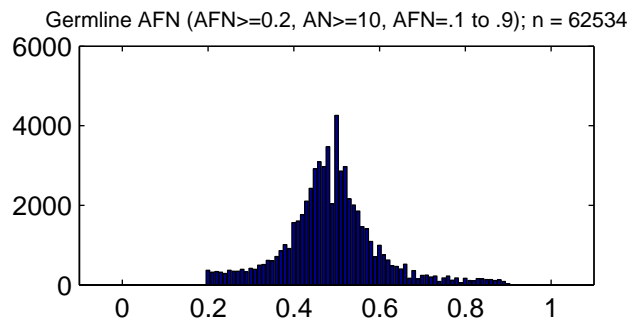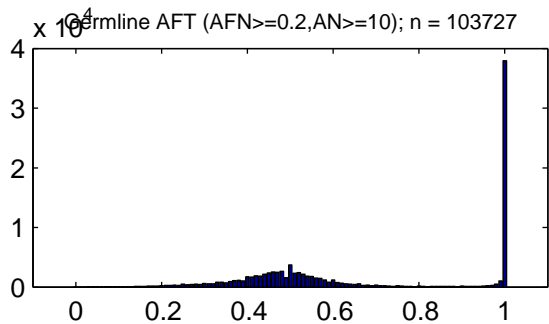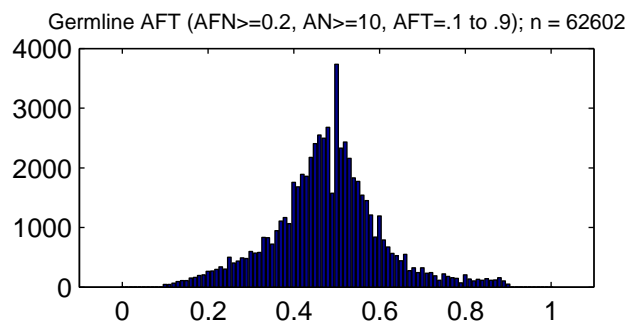

471\_ucsc.edu\_BRCA.IlluminaGA\_DNASeq.Level\_2.12.0.0 -- TCGA-D8-A141\_D

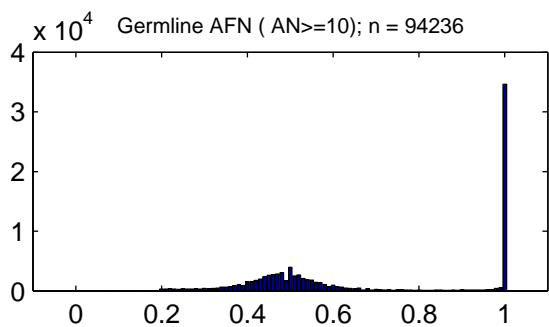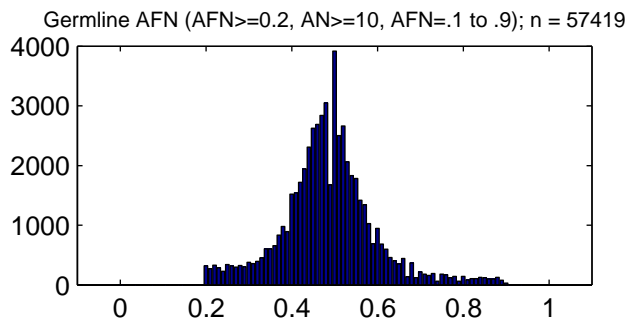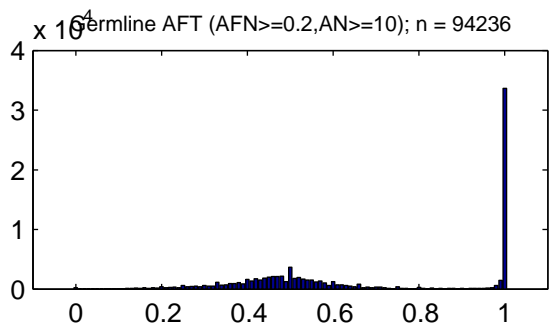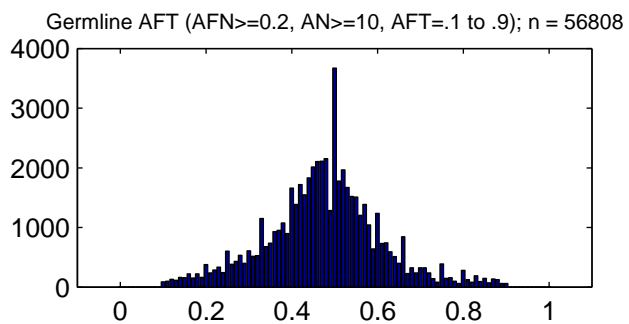



472\_ucsc.edu\_BRCA.IlluminaGA\_DNASeq.Level\_2.10.0.0 -- TCGA-BH-A0H3\_C

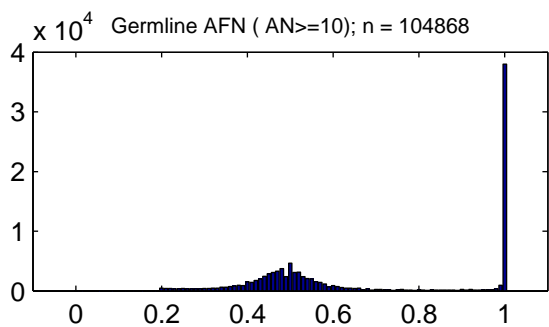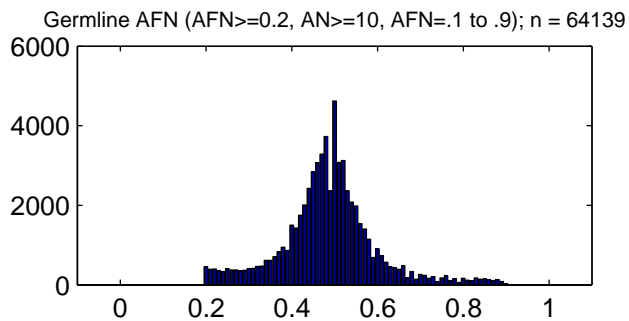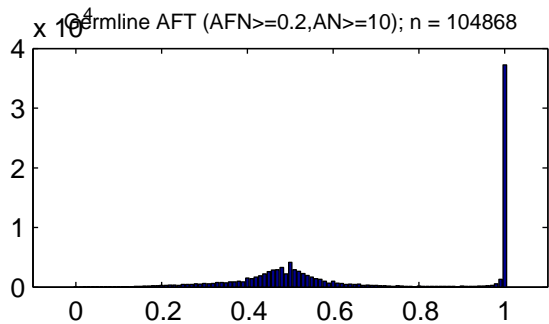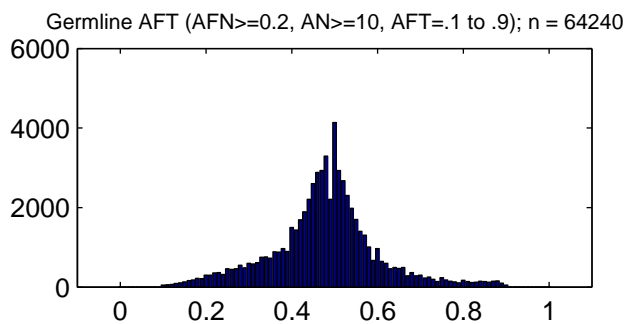

473\_ucsc.edu\_BRCA.IlluminaGA\_DNASeq.Level\_2.10.0.0 -- TCGA-BH-A0DO\_I

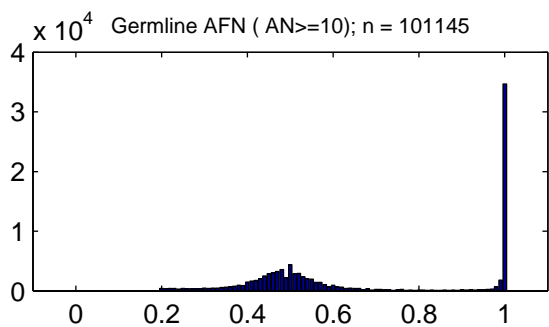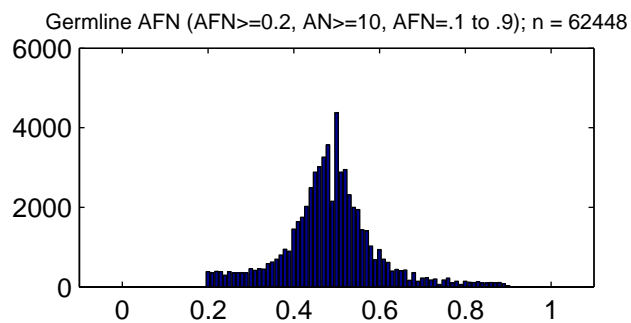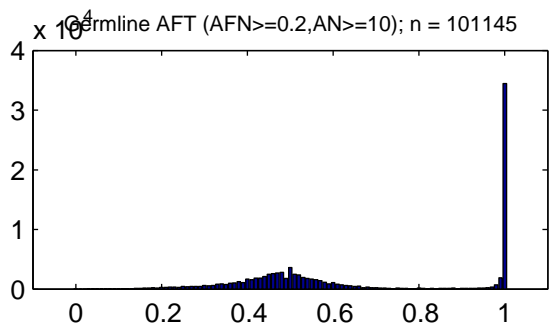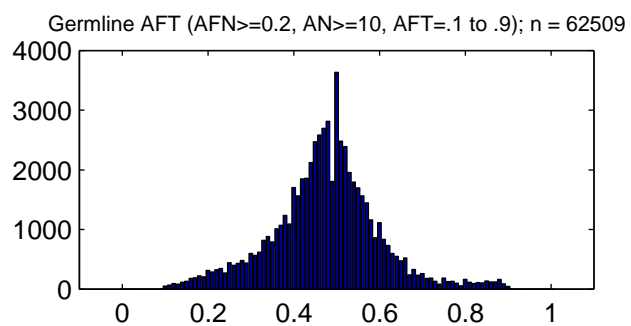

474\_ucsc.edu\_BRCA.IlluminaGA\_DNASeq.Level\_2.10.0.0 -- TCGA-BH-A0DG\_I

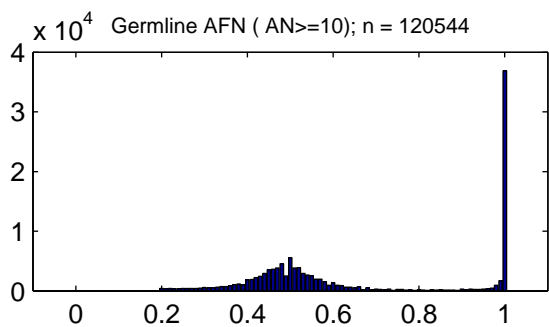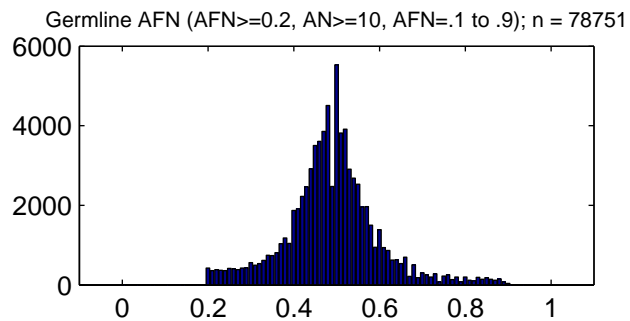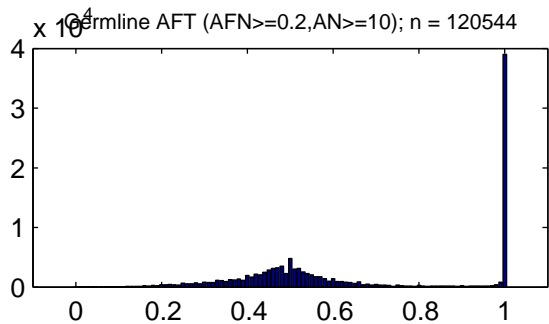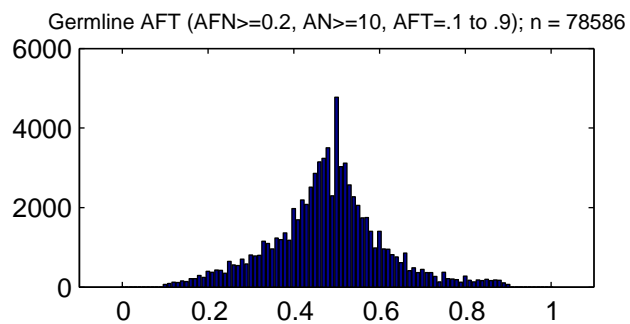

475\_ucsc.edu\_BRCA.IlluminaGA\_DNASeq.Level\_2.9.0.0 -- TCGA-B6-A0RT\_D

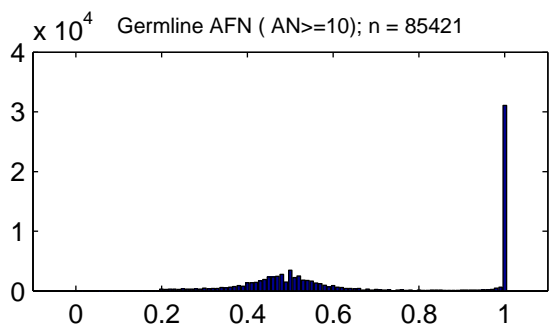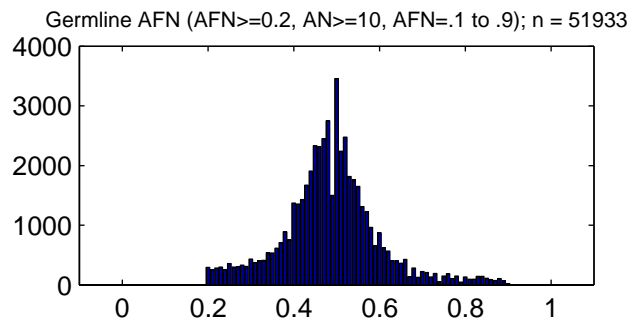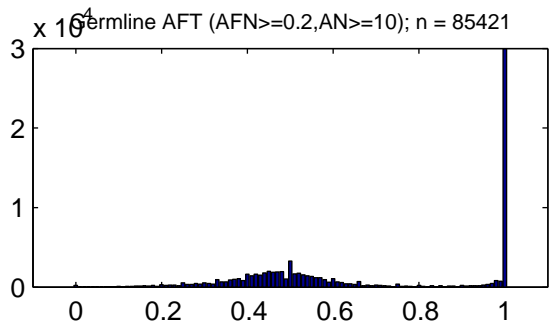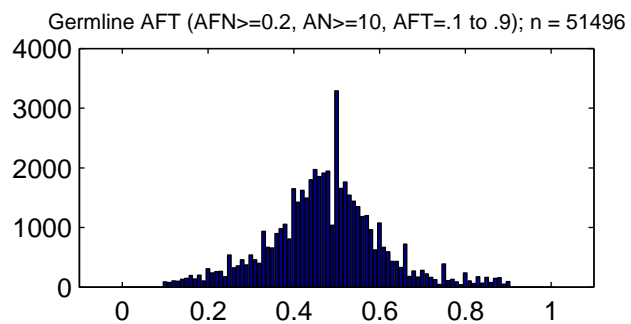

476\_ucsc.edu\_BRCA.IlluminaGA\_DNASeq.Level\_2.2.0.0 -- TCGA-A2-A0T5\_D

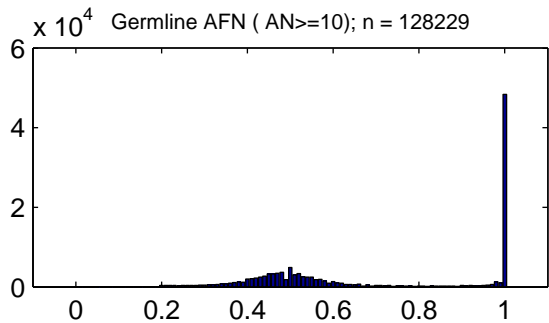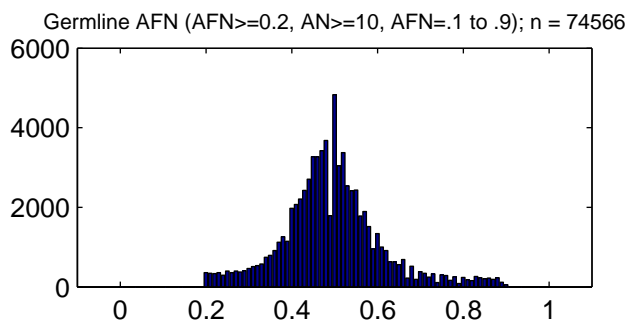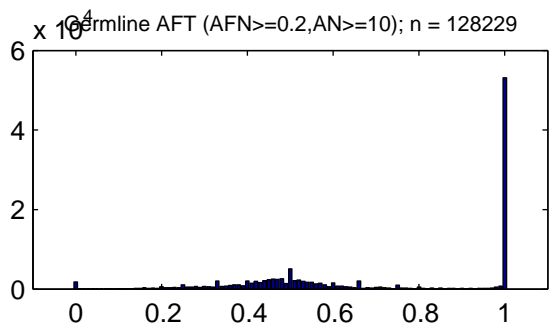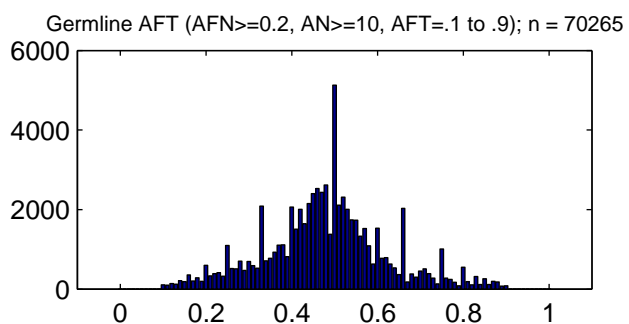

477\_ucsc.edu\_BRCA.IlluminaGA\_DNASeq.Level\_2.4.0.0 -- TCGA-A8-A08C\_W

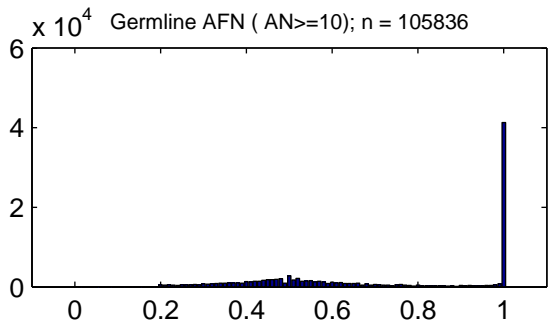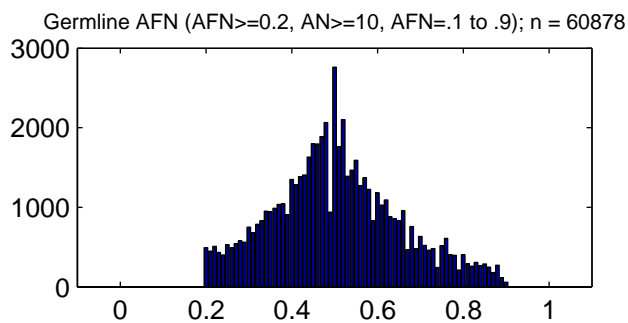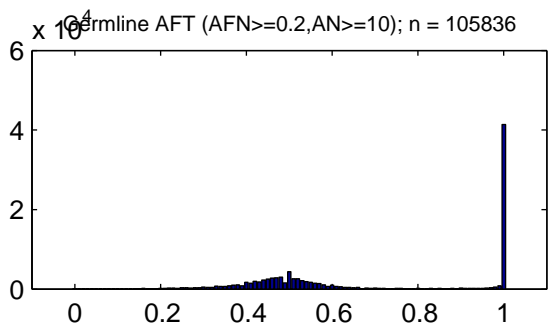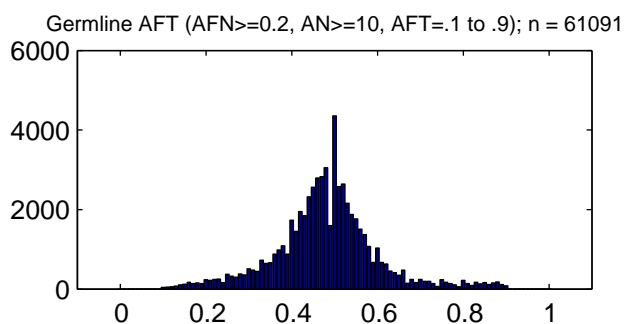

478\_ucsc.edu\_BRCA.IlluminaGA\_DNASeq.Level\_2.13.0.0 -- TCGA-E2-A10F\_D

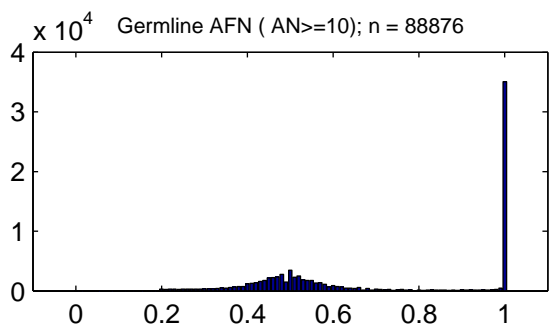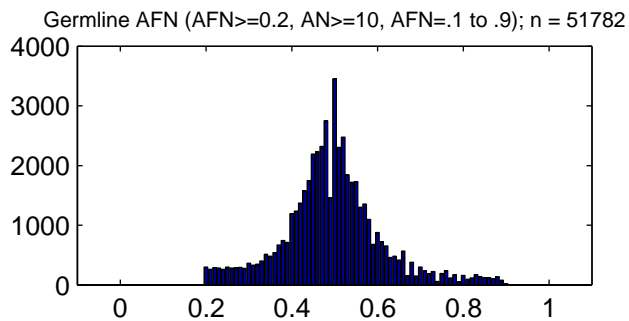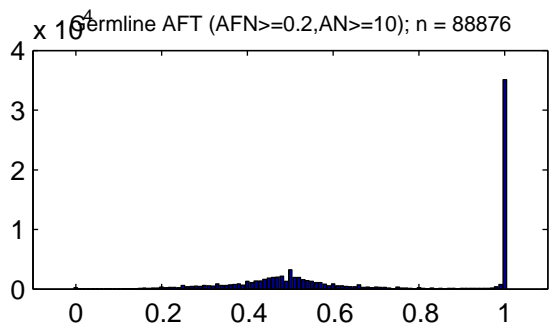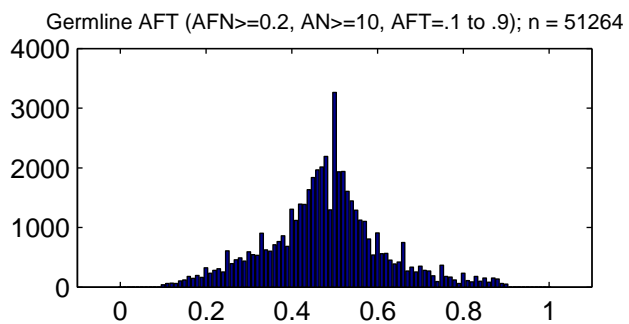

479\_ucsc.edu\_BRCA.IlluminaGA\_DNASeq.Level\_2.2.0.0 -- TCGA-A2-A0D3\_D

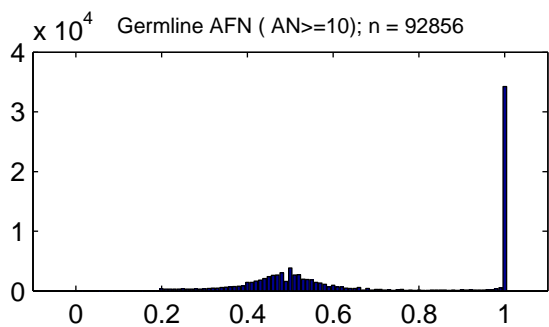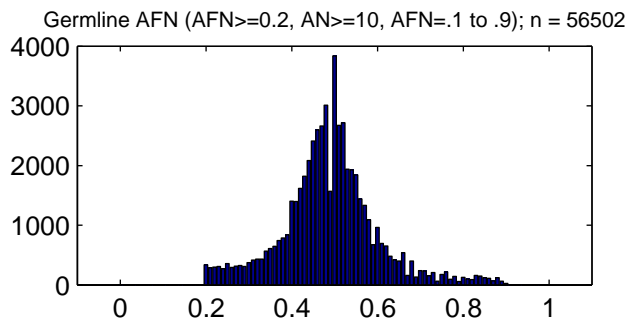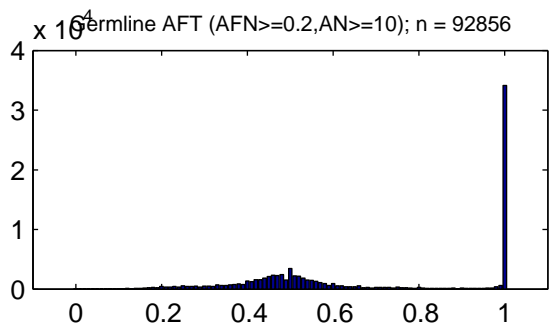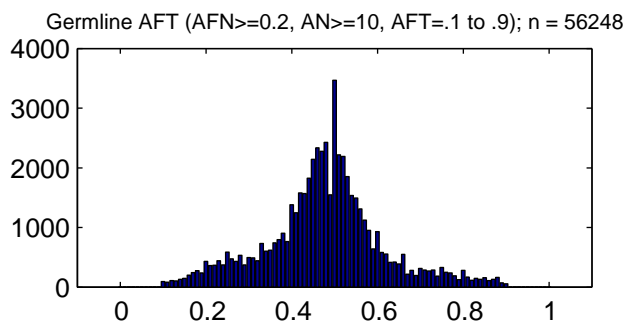



480\_ucsc.edu\_BRCA.IlluminaGA\_DNASeq.Level\_2.2.0.0 -- TCGA-A2-A0ES\_D

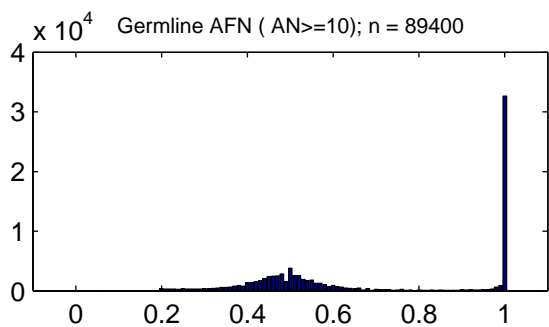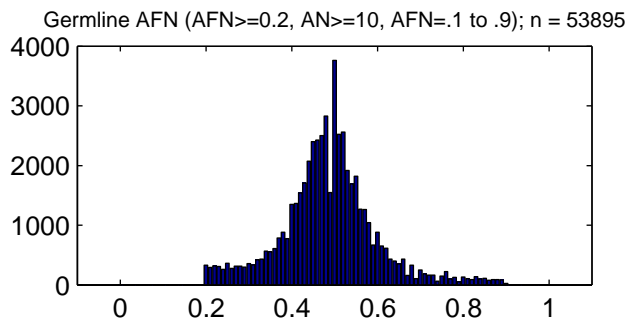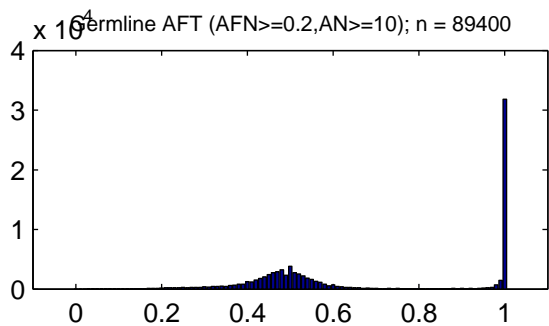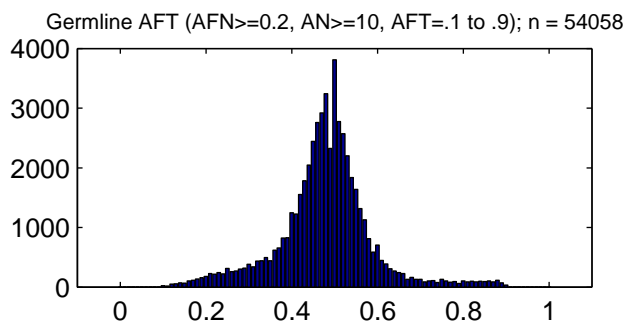

481\_ucsc.edu\_BRCA.IlluminaGA\_DNASeq.Level\_2.8.0.0 -- TCGA-AR-A1AW\_D

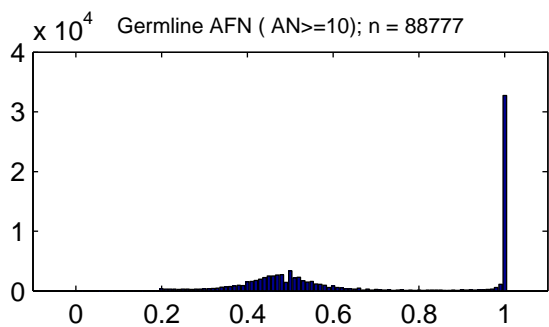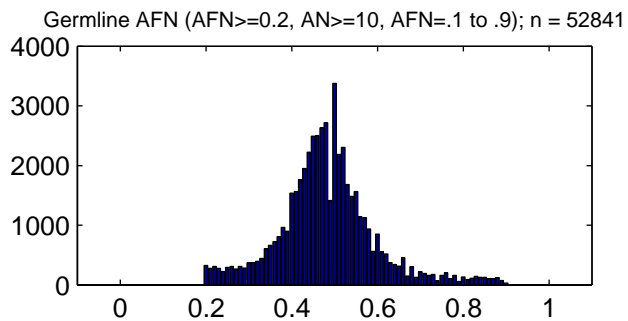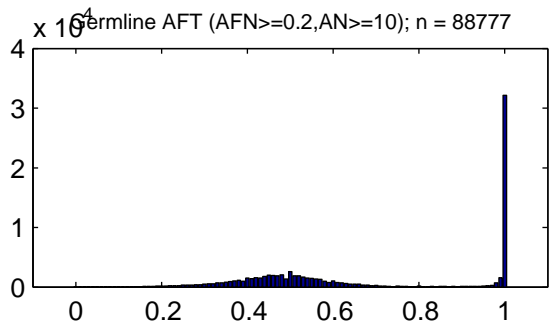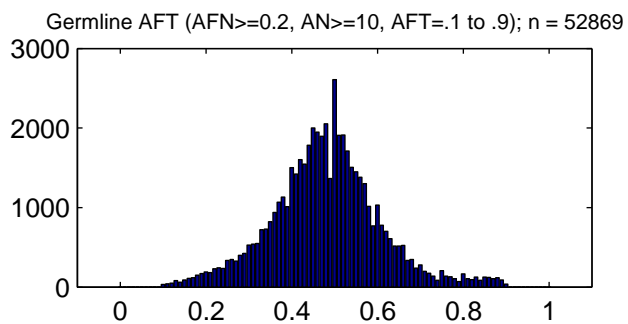

482\_ucsc.edu\_BRCA.IlluminaGA\_DNASeq.Level\_2.2.0.0 -- TCGA-A2-A04Q\_W

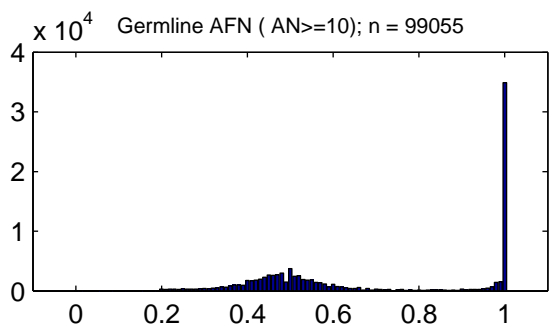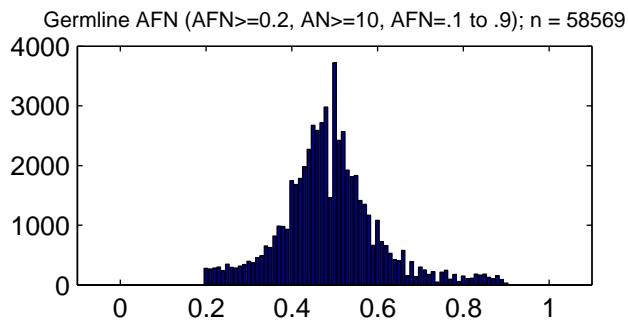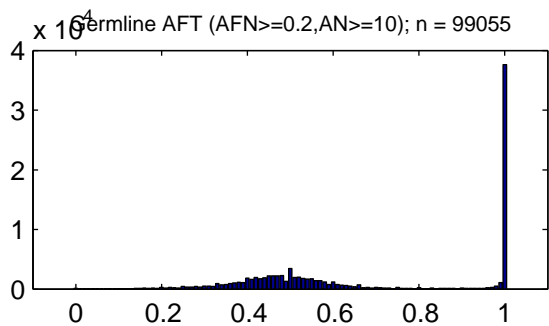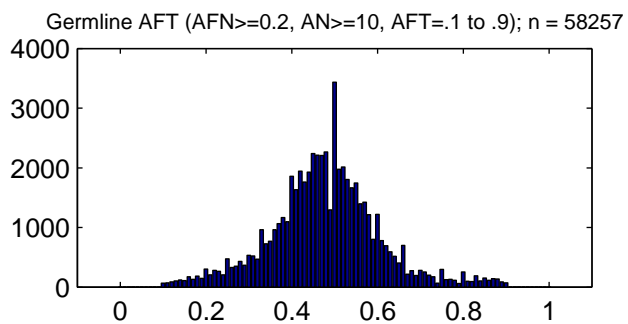

483\_ucsc.edu\_BRCA.IlluminaGA\_DNASeq.Level\_2.13.0.0 --- TCGA-E2-A14Q\_C

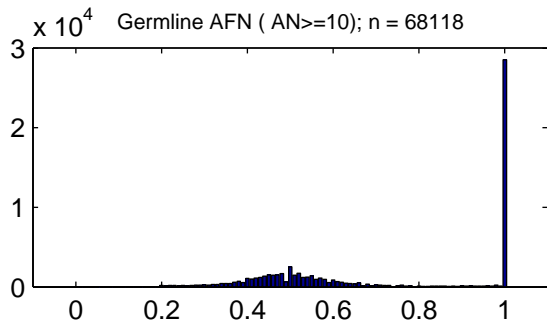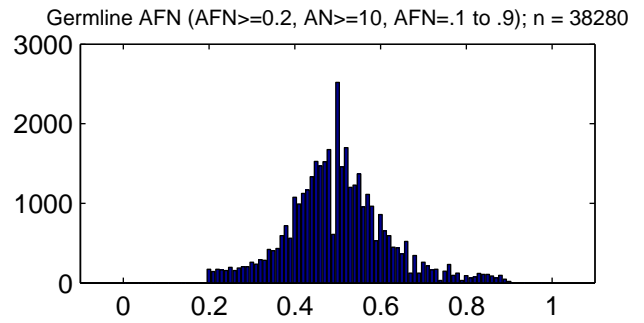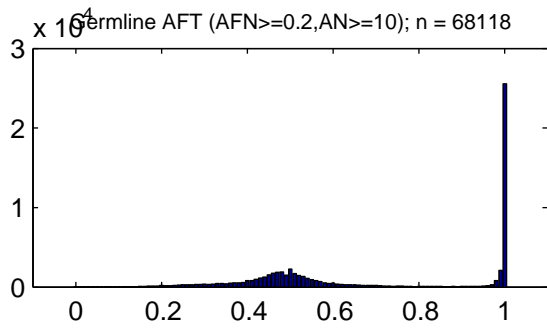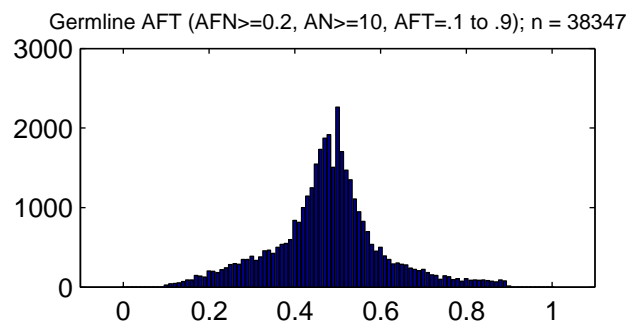

484\_ucsc.edu\_BRCA.IlluminaGA\_DNASeq.Level\_2.2.0.0 -- TCGA-A2-A0SY\_D

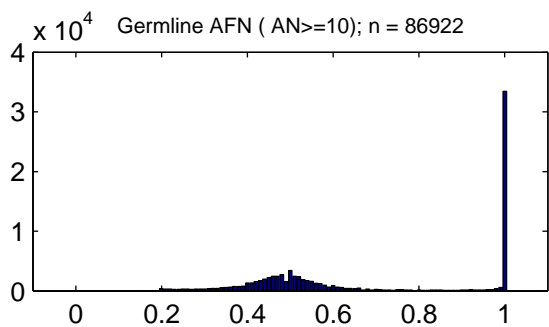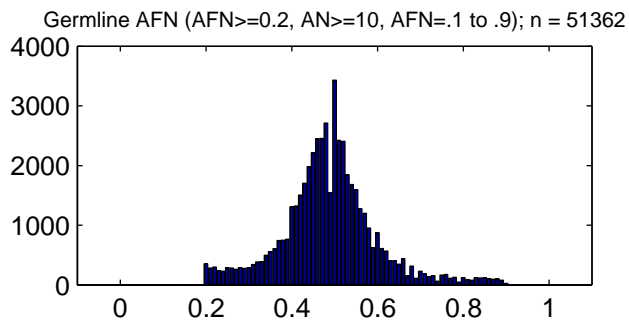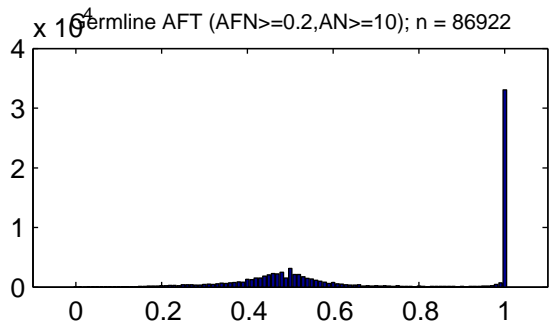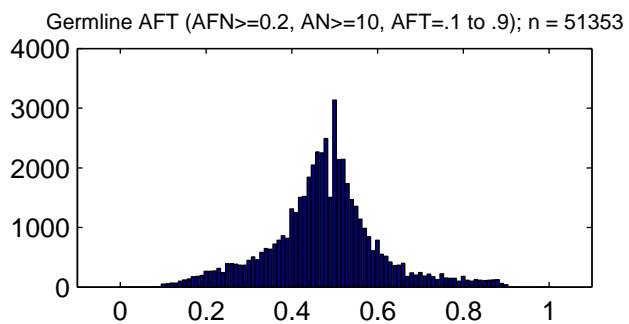

485\_ucsc.edu\_BRCA.IlluminaGA\_DNASeq.Level\_2.10.0.0 -- TCGA-BH-A0DT\_C

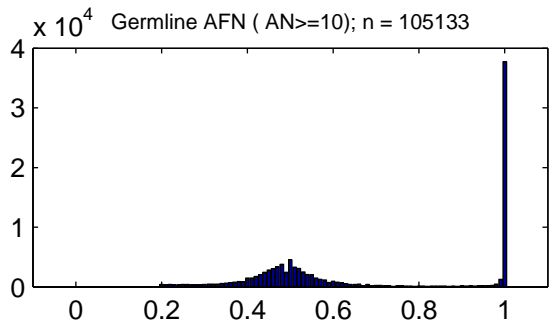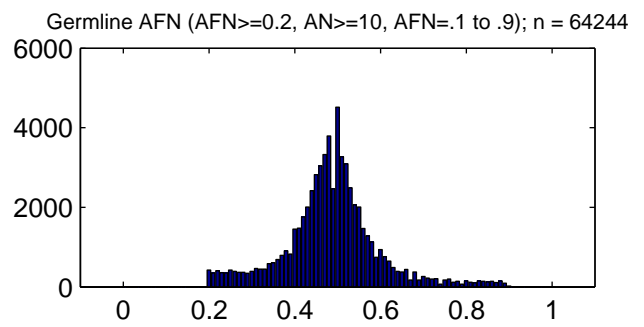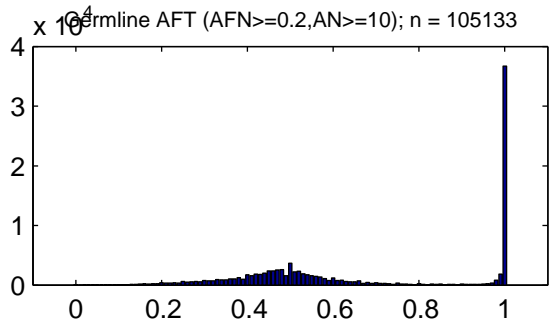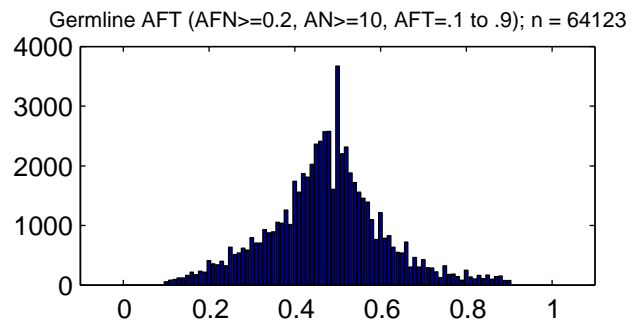

486\_ucsc.edu\_BRCA.IlluminaGA\_DNASeq.Level\_2.1.0.0 -- TCGA-A1-A0SH\_D

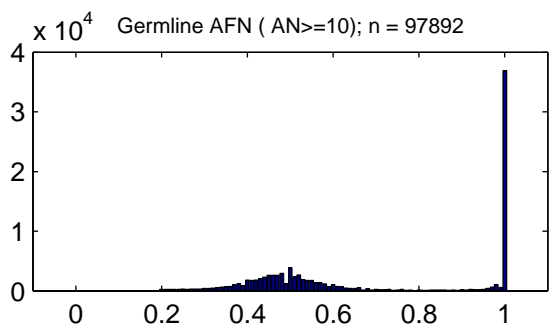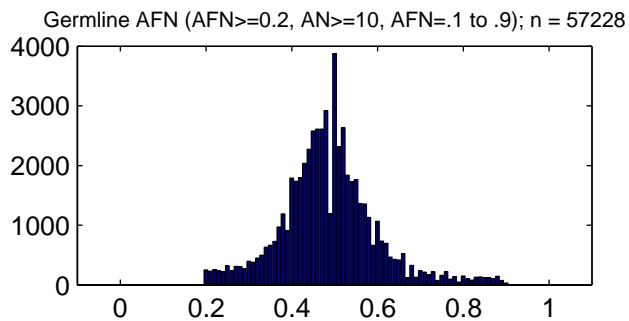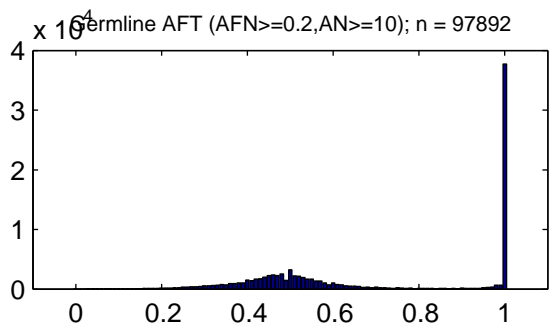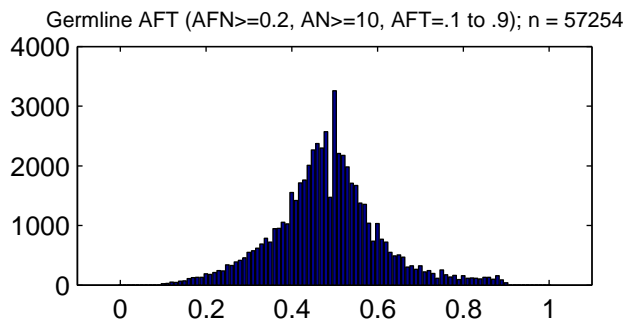

487\_ucsc.edu\_BRCA.IlluminaGA\_DNASeq.Level\_2.2.0.0 -- TCGA-A2-A04N\_D

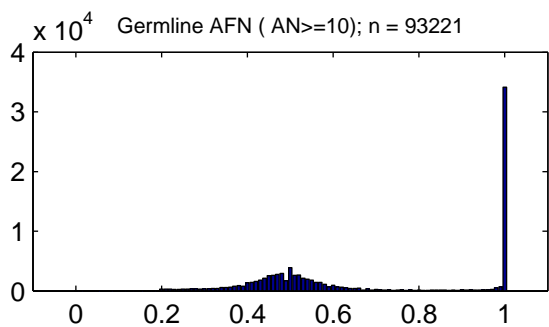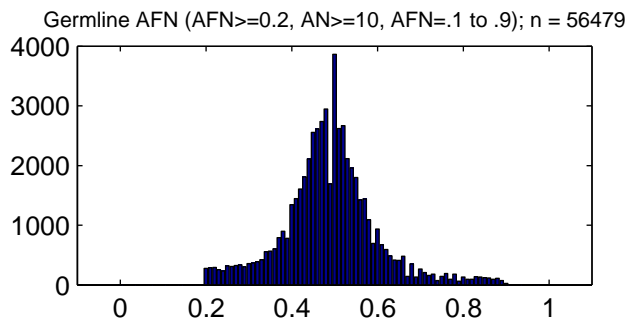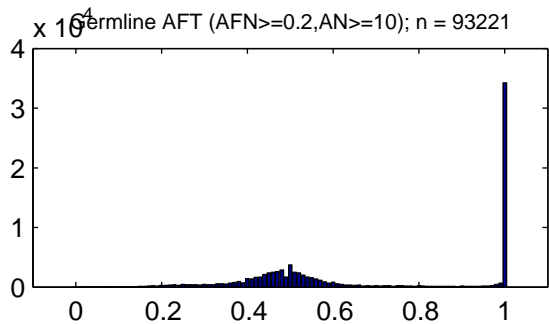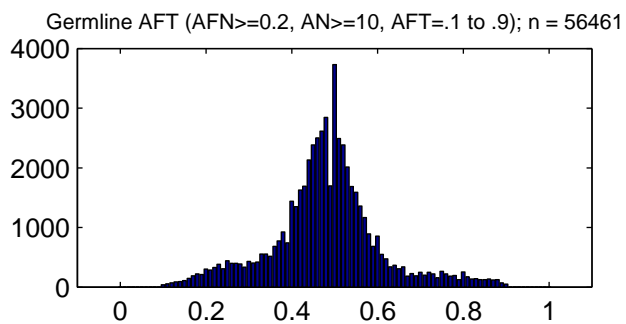



488\_ucsc.edu\_BRCA.IlluminaGA\_DNASeq.Level\_2.10.0.0 -- TCGA-BH-A0B7\_C

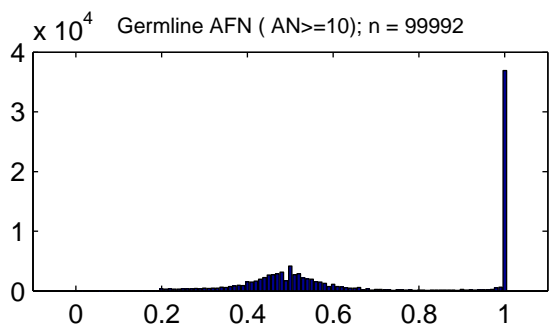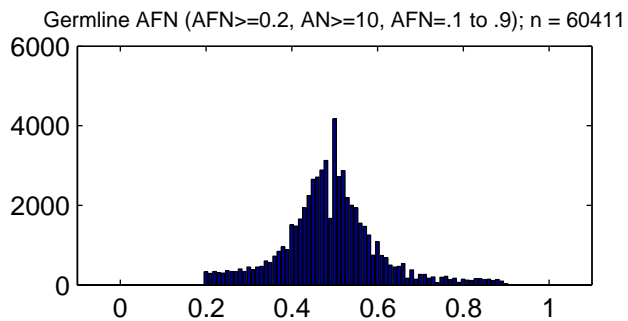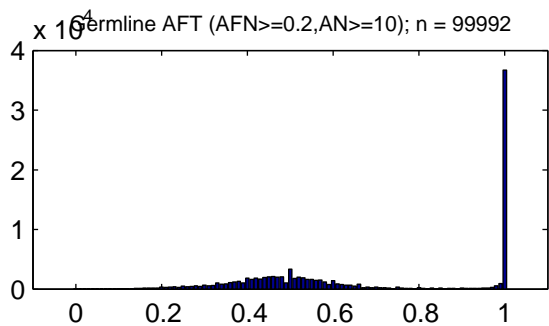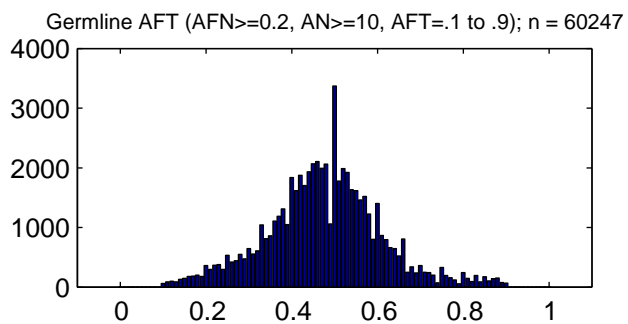

489\_ucsc.edu\_BRCA.IlluminaGA\_DNASeq.Level\_2.13.0.0 -- TCGA-E2-A108\_D

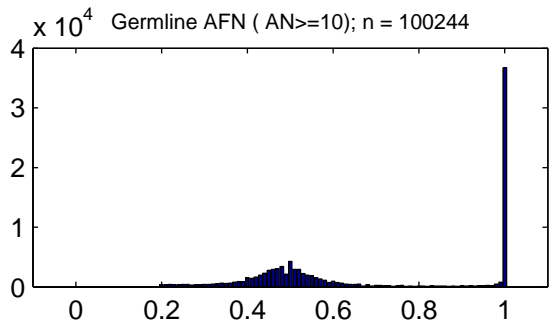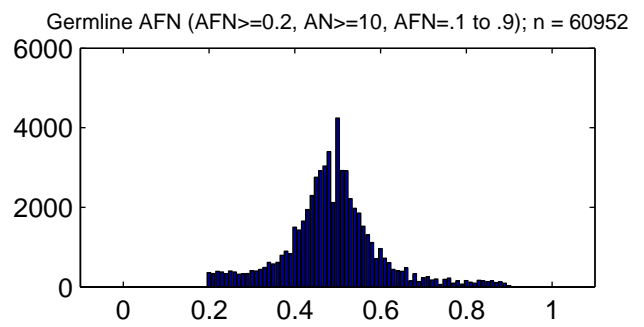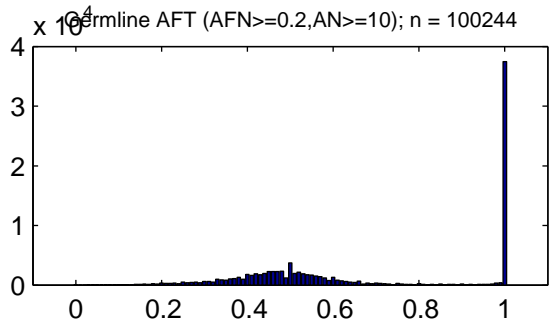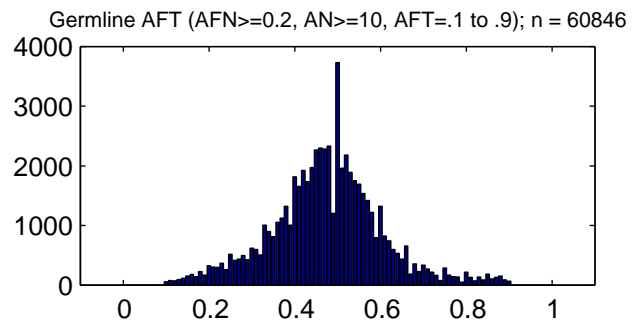

490\_ucsc.edu\_BRCA.IlluminaGA\_DNASeq.Level\_2.6.0.0 -- TCGA-AO-A125\_D

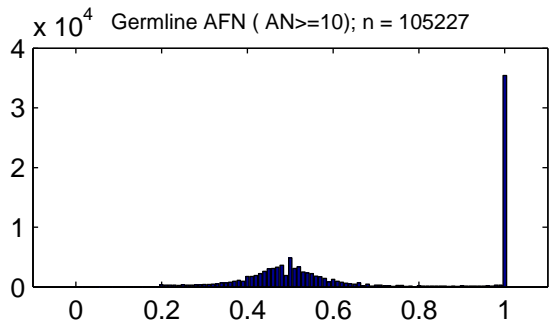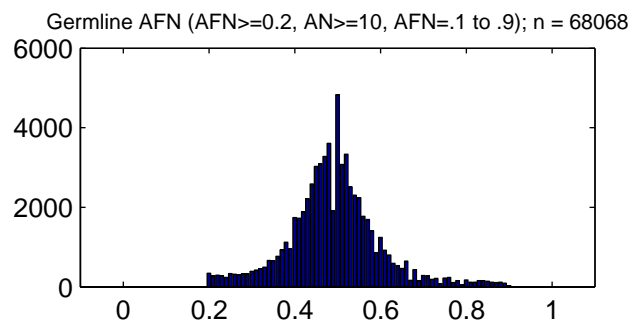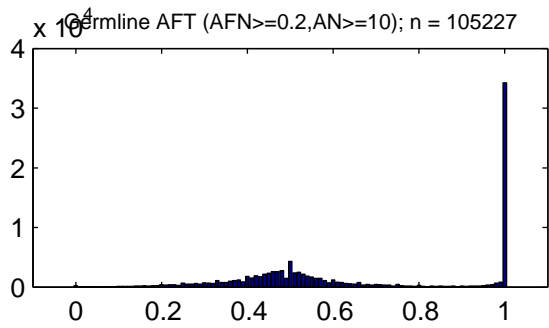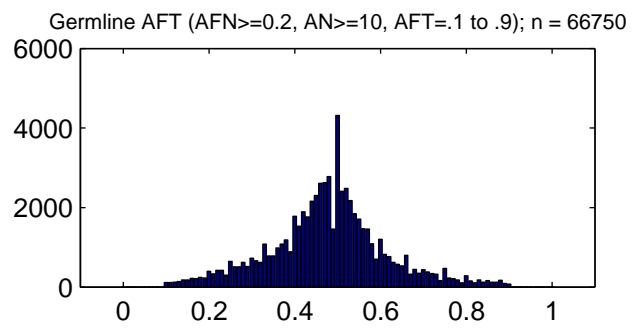

491\_ucsc.edu\_BRCA.IlluminaGA\_DNASeq.Level\_2.13.0.0 -- TCGA-E2-A1B4\_C

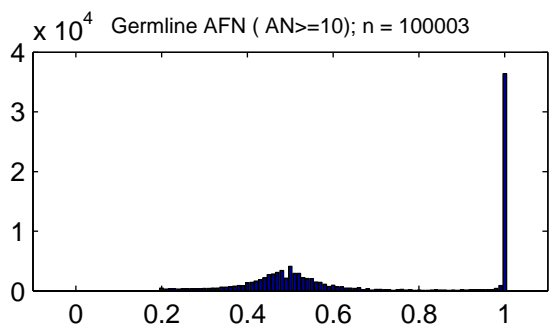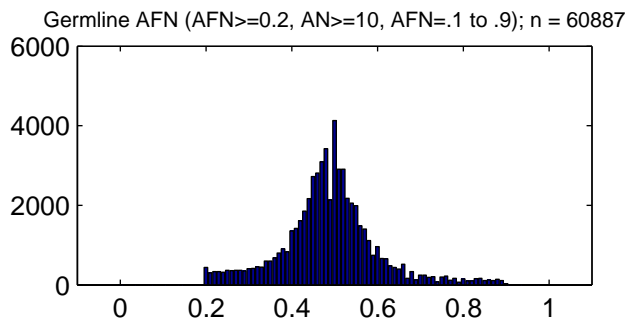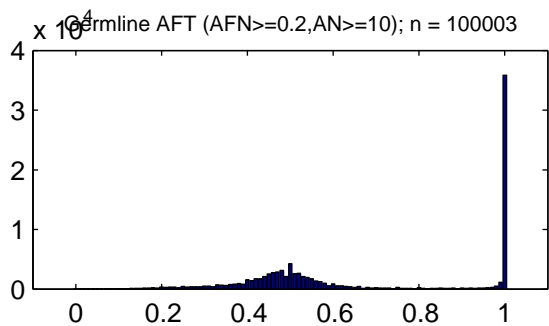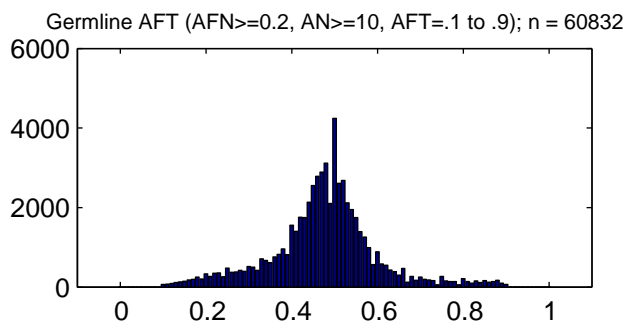

492\_ucsc.edu\_BRCA.IlluminaGA\_DNASeq.Level\_2.10.0.0 -- TCGA-BH-A0DX\_I

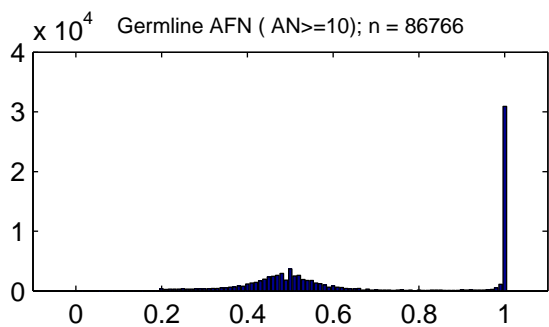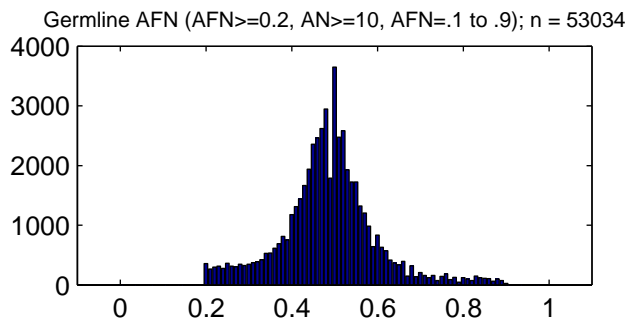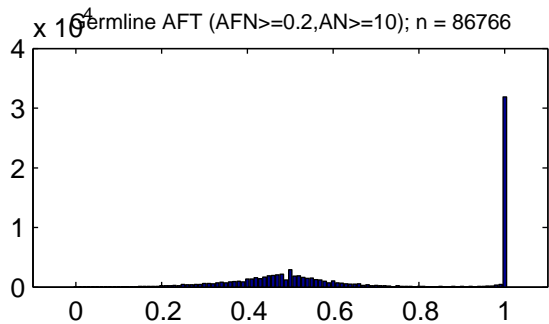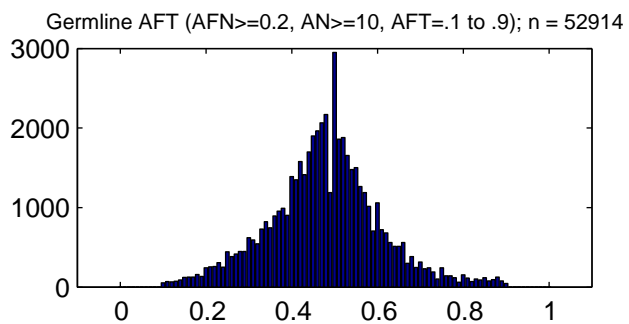

493\_ucsc.edu\_BRCA.IlluminaGA\_DNASeq.Level\_2.2.0.0 -- TCGA-A2-A0T6\_D

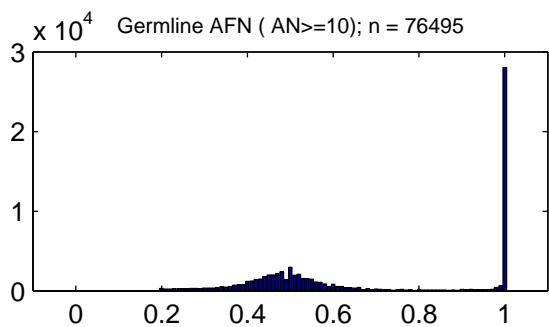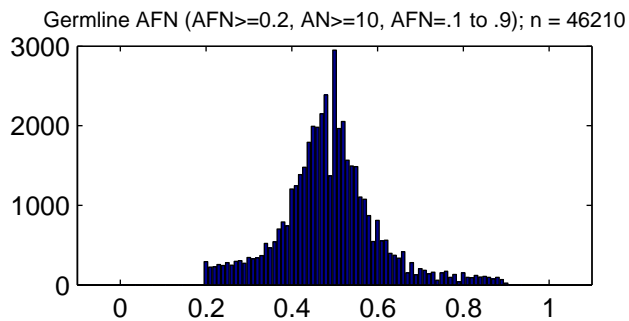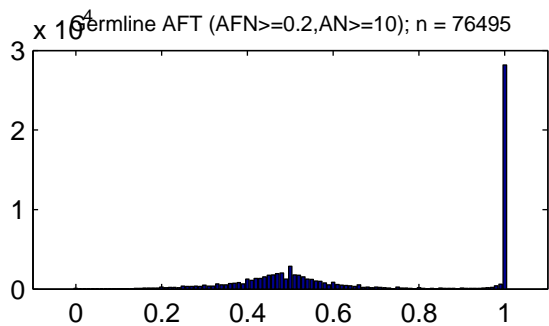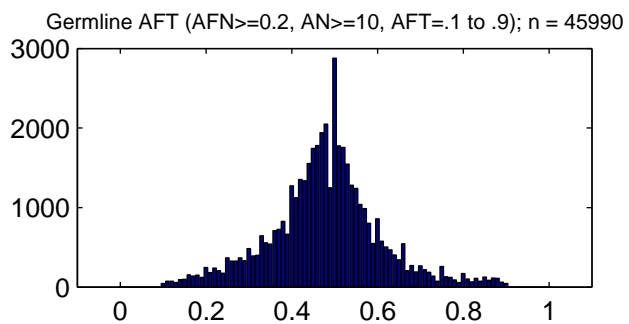

494\_ucsc.edu\_BRCA.IlluminaGA\_DNASeq.Level\_2.13.0.0 -- TCGA-E2-A1BC\_C

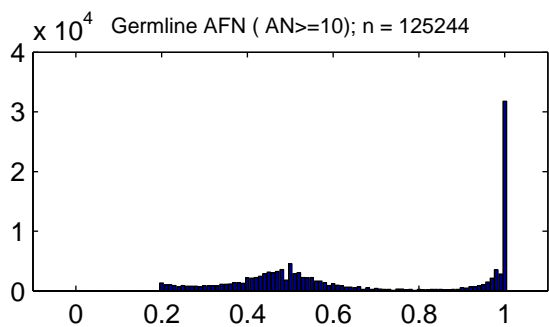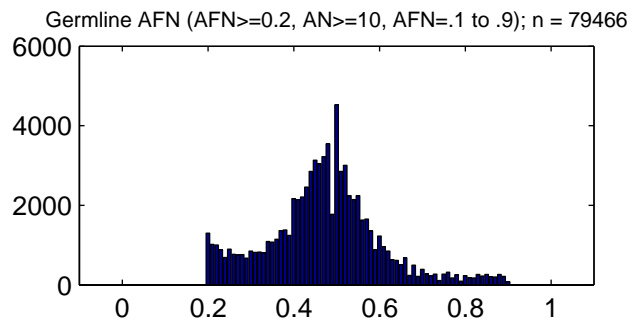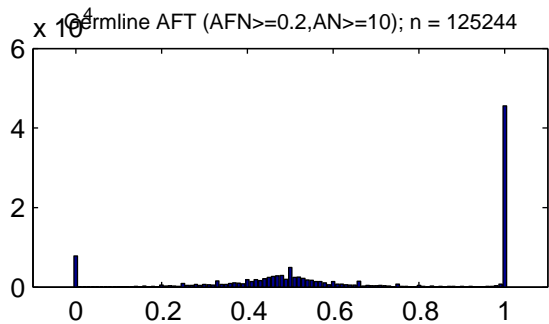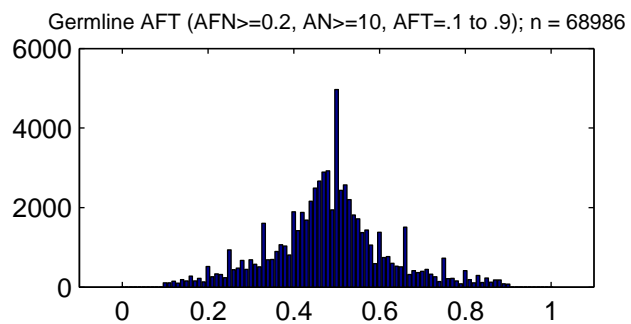

495\_ucsc.edu\_BRCA.IlluminaGA\_DNASeq.Level\_2.14.0.0 -- TCGA-B6-A0IP\_W

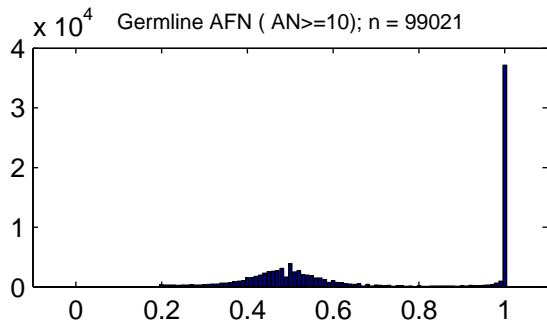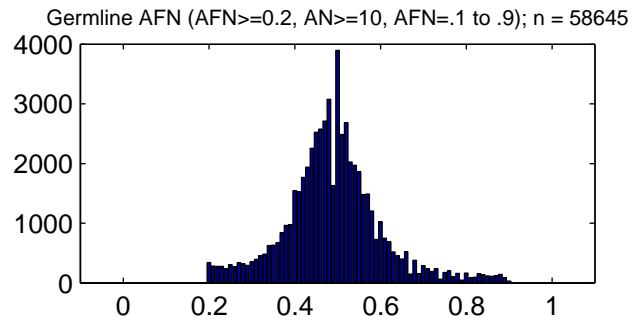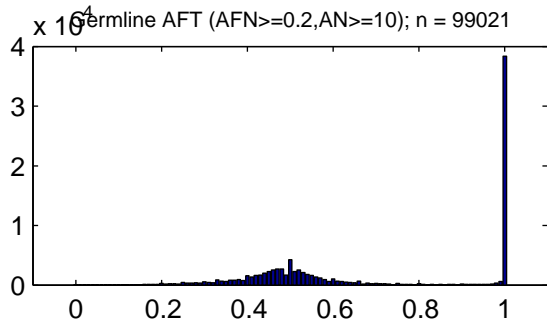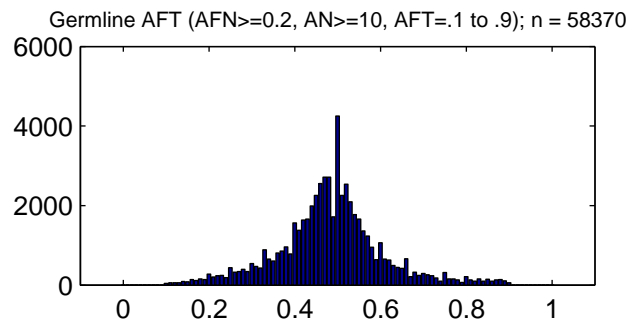



496\_ucsc.edu\_BRCA.IlluminaGA\_DNASeq.Level\_2.11.0.0 -- TCGA-C8-A12V\_C

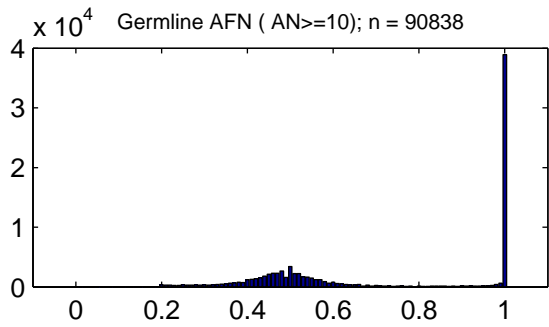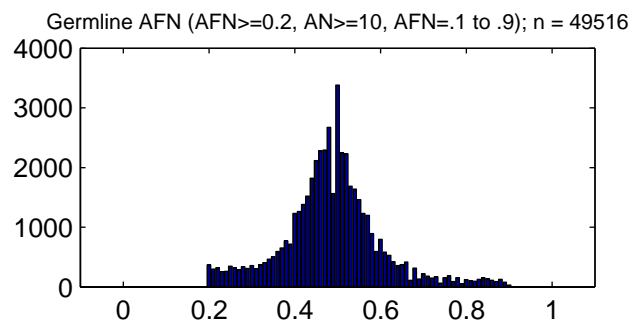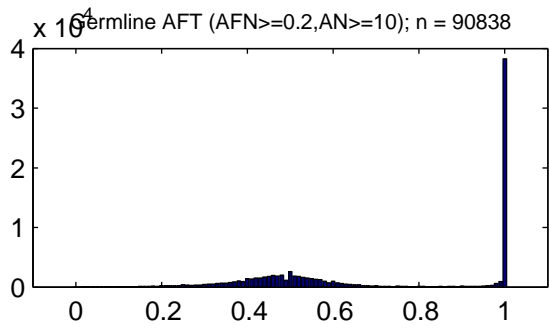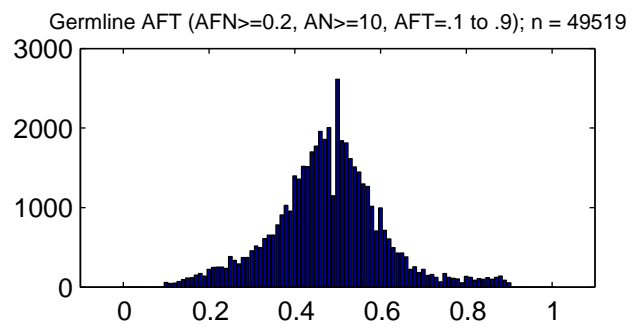

497\_ucsc.edu\_BRCA.IlluminaGA\_DNASeq.Level\_2.10.0.0 -- TCGA-BH-A0EA\_C

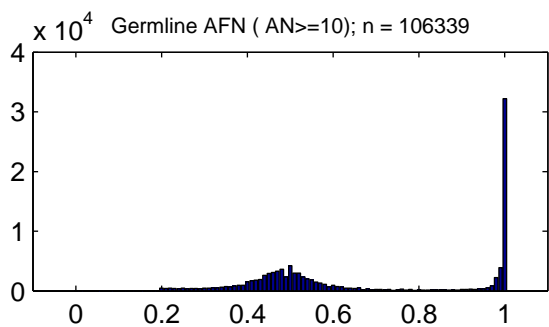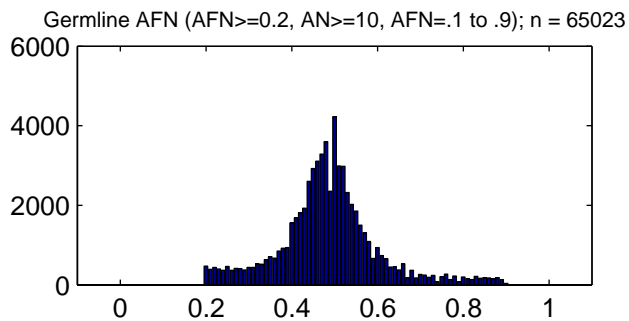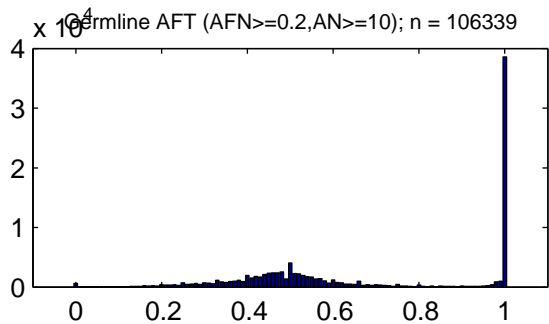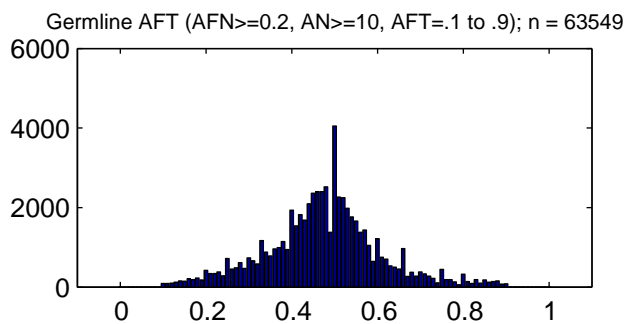

498\_ucsc.edu\_BRCA.IlluminaGA\_DNASeq.Level\_2.10.0.0 -- TCGA-BH-A0B0\_C

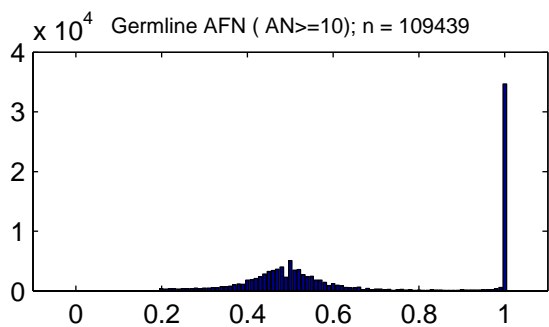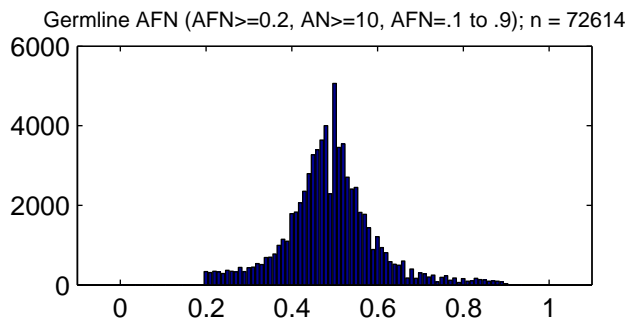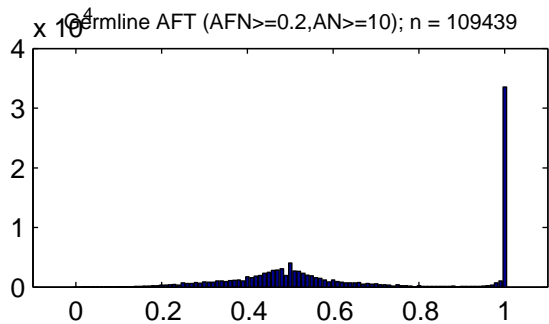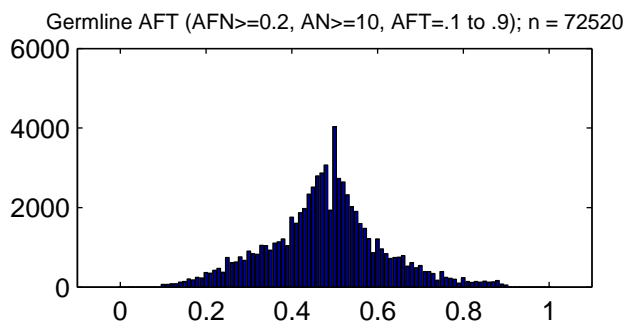

499\_ucsc.edu\_BRCA.IlluminaGA\_DNASeq.Level\_2.10.0.0 -- TCGA-BH-A0HO\_V

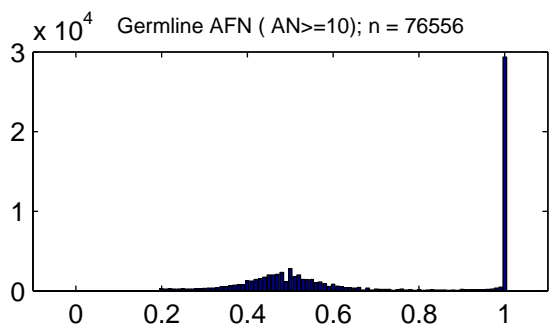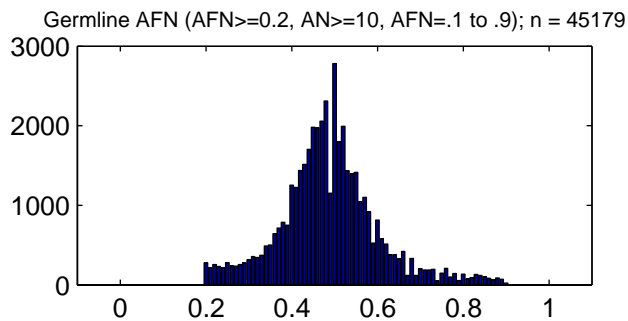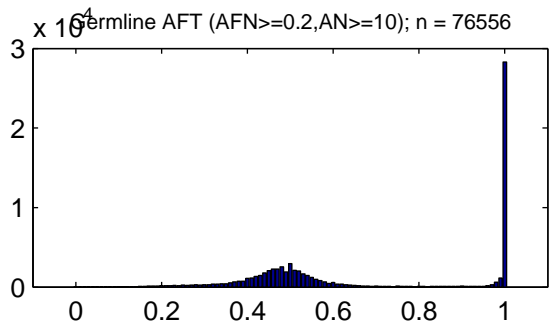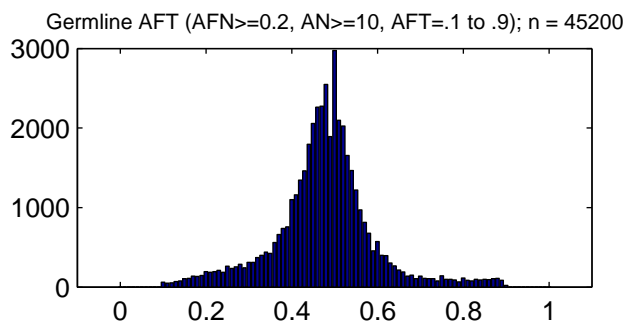

500\_ucsc.edu\_BRCA.IlluminaGA\_DNASeq.Level\_2.10.0.0 -- TCGA-BH-A0DV\_I

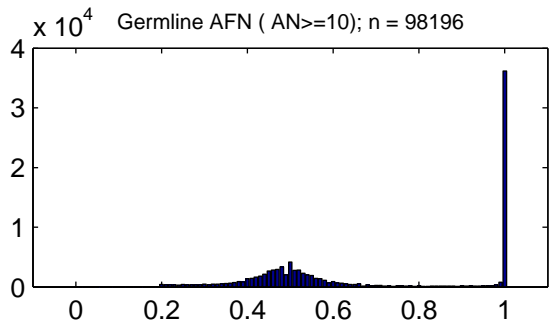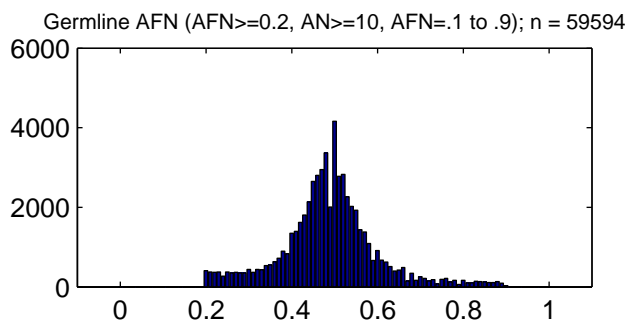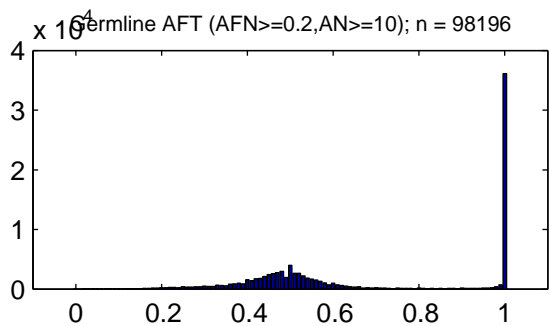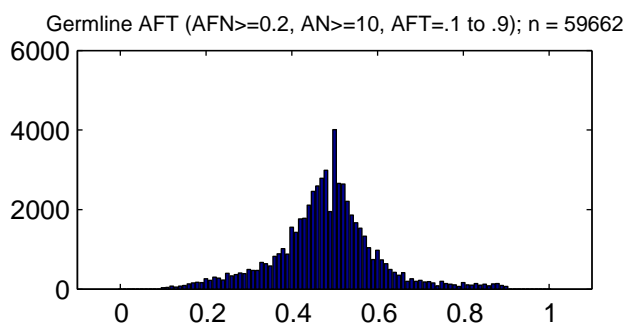

501\_ucsc.edu\_BRCA.IlluminaGA\_DNASeq.Level\_2.10.0.0 -- TCGA-BH-A0E9\_C

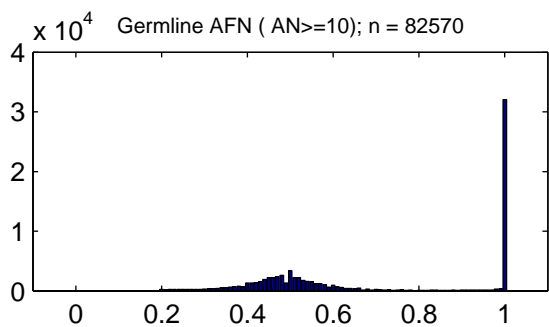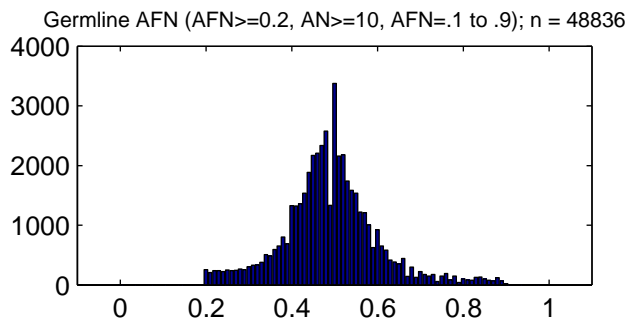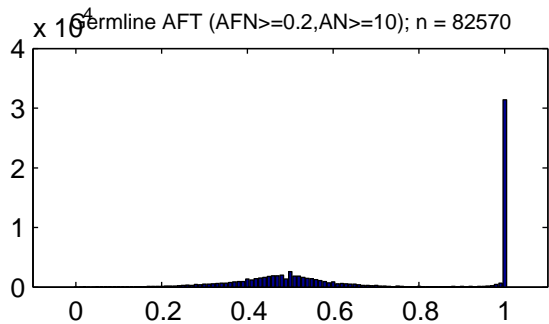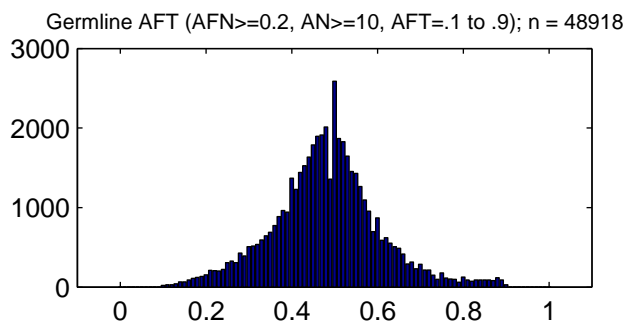

502\_ucsc.edu\_BRCA.IlluminaGA\_DNASeq.Level\_2.10.0.0 -- TCGA-BH-A0RX\_I

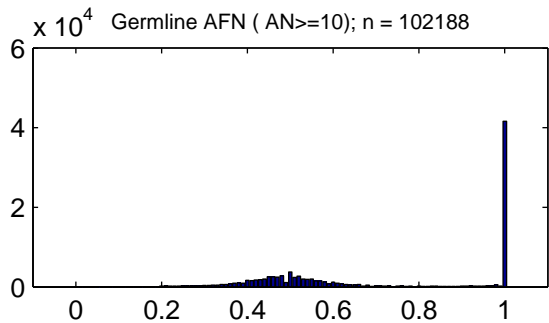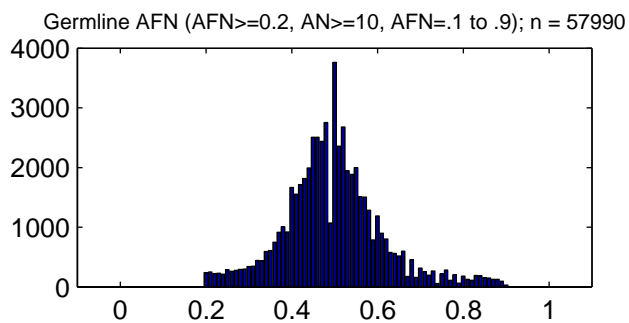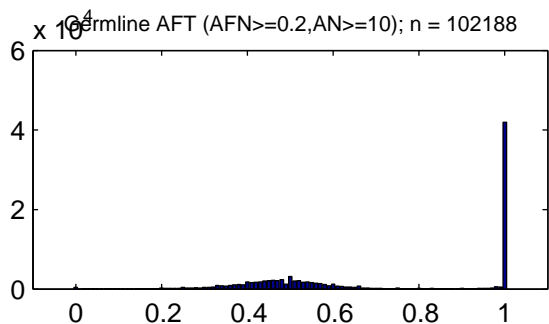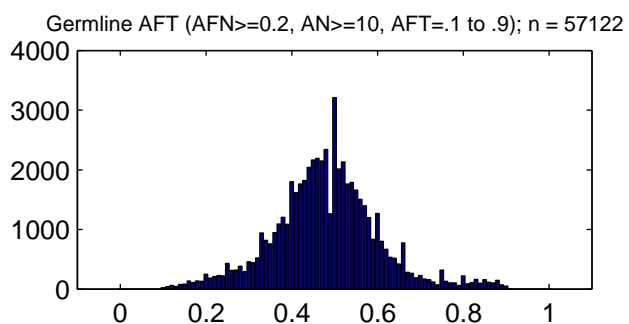

503\_ucsc.edu\_BRCA.IlluminaGA\_DNASeq.Level\_2.10.0.0 -- TCGA-BH-A0BS\_I

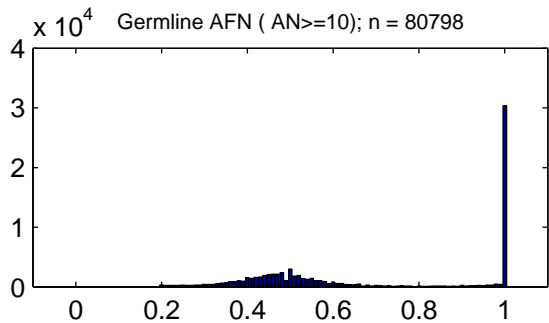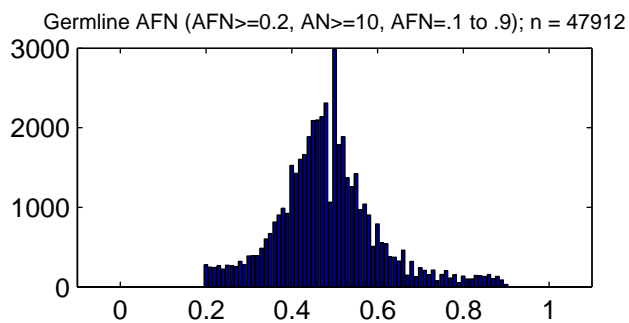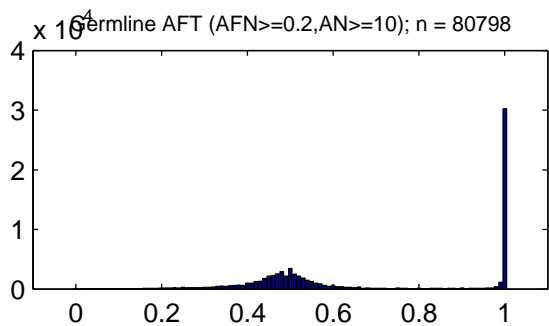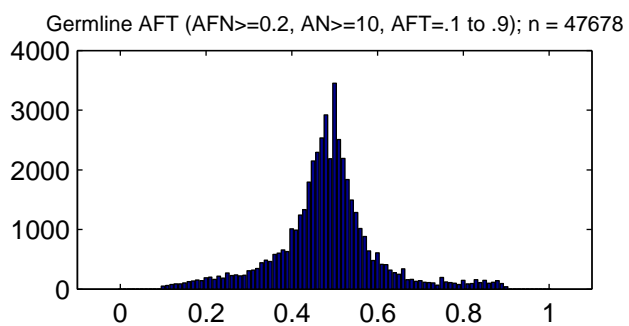



504\_ucsc.edu\_BRCA.IlluminaGA\_DNASeq.Level\_2.2.0.0 -- TCGA-A2-A0CL\_D

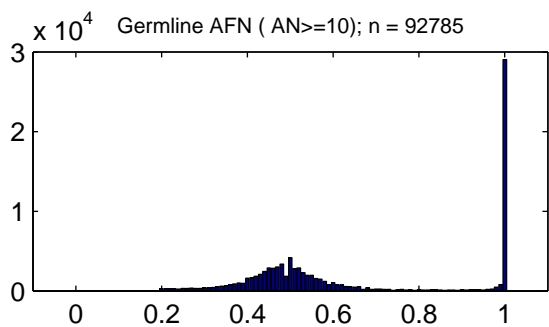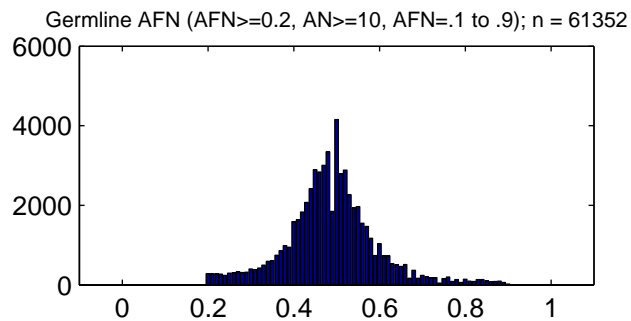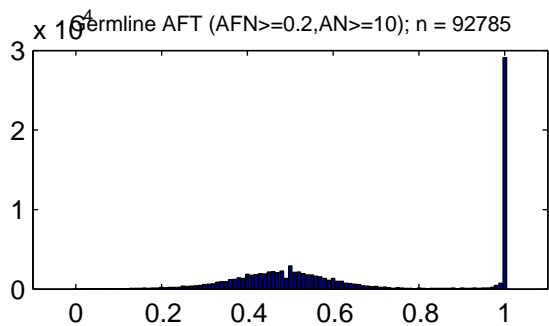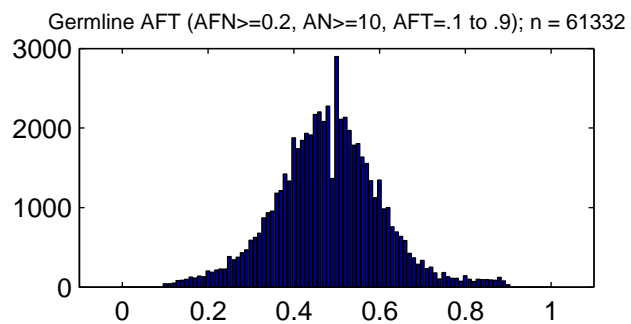

505\_ucsc.edu\_BRCA.IlluminaGA\_DNASeq.Level\_2.10.0.0 -- TCGA-BH-A0W5\_I

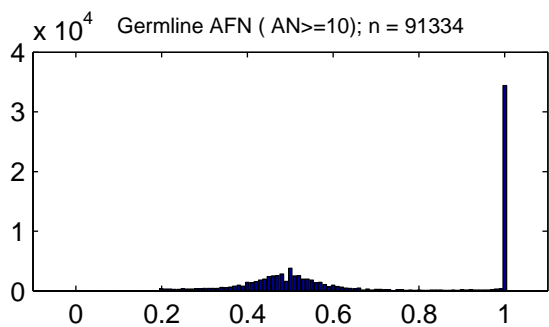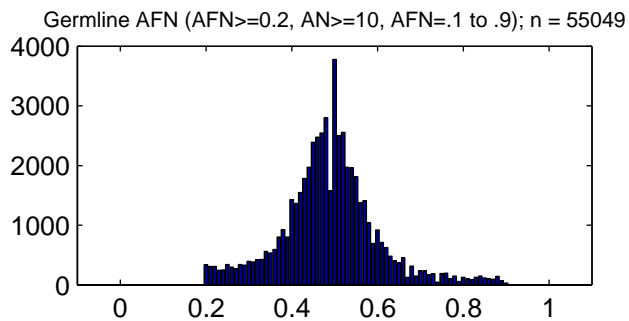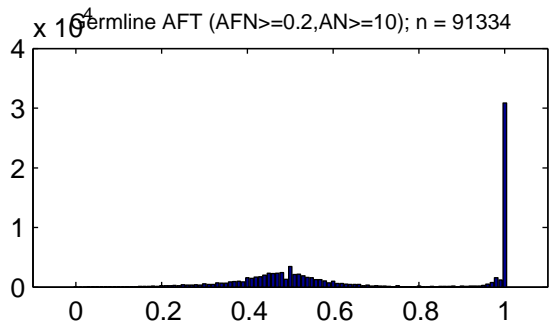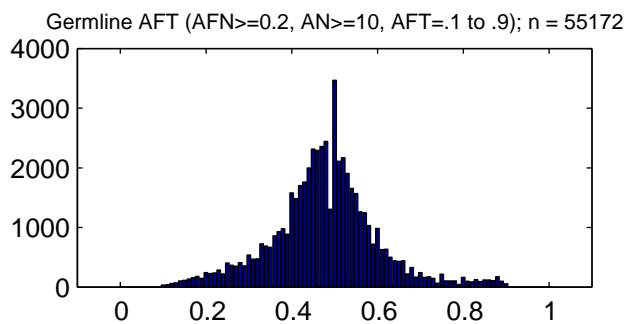

506\_ucsc.edu\_BRCA.IlluminaGA\_DNASeq.Level\_2.2.0.0 -- TCGA-A2-A0EN\_D

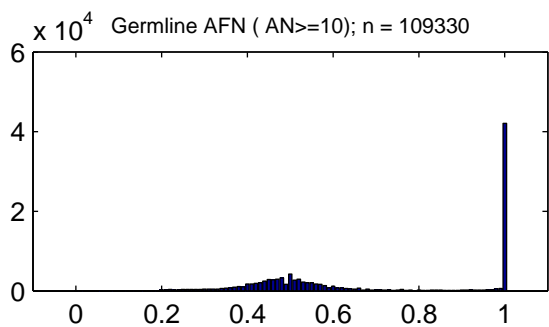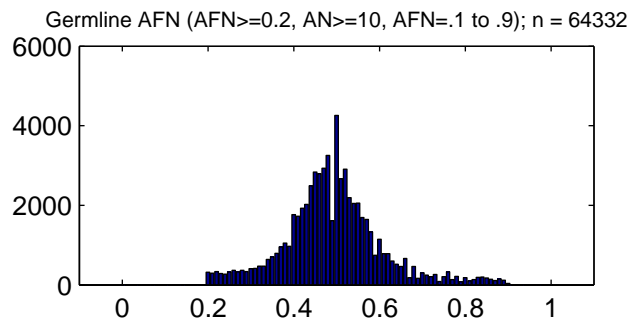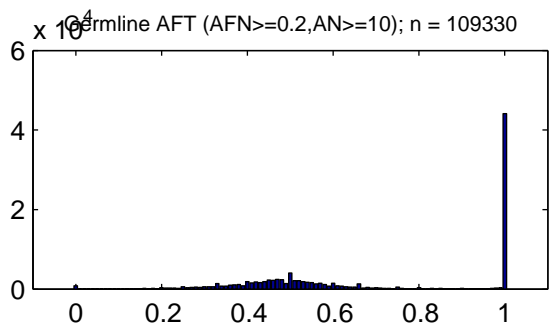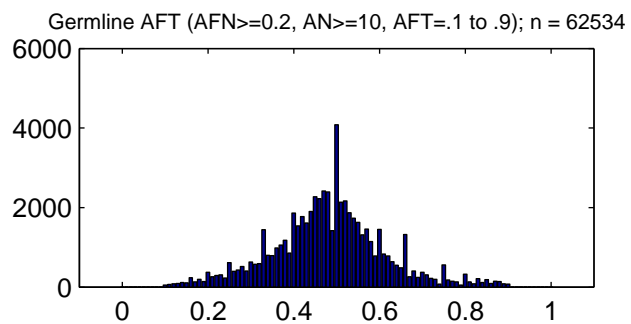

507\_ucsc.edu\_BRCA.IlluminaGA\_DNASeq.Level\_2.9.0.0 -- TCGA-B6-A0RM\_D

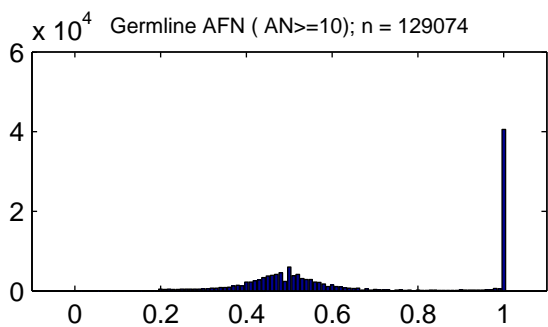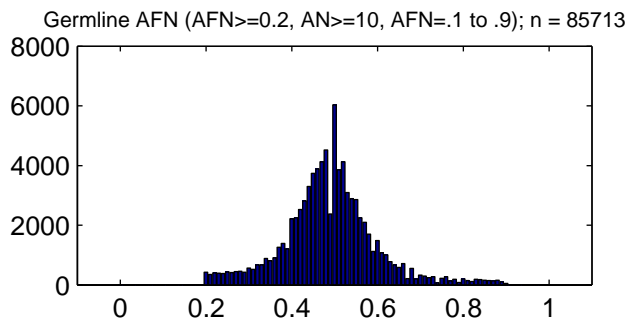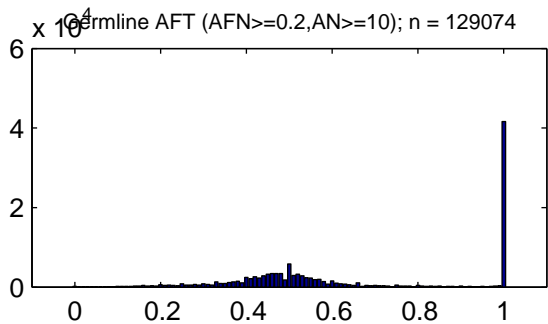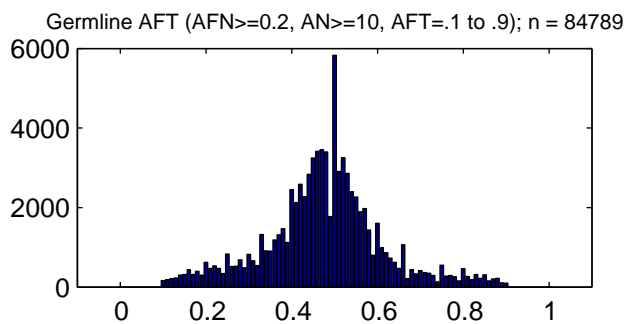

508\_ucsc.edu\_BRCA.IlluminaGA\_DNASeq.Level\_2.13.0.0 -- TCGA-E2-A1B5\_C

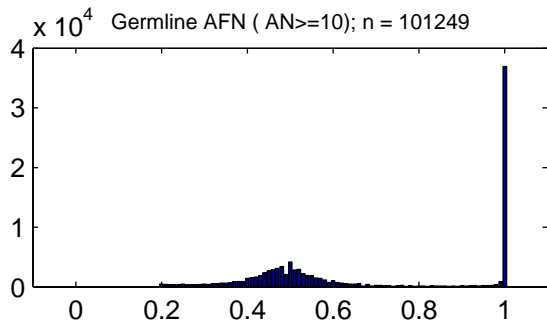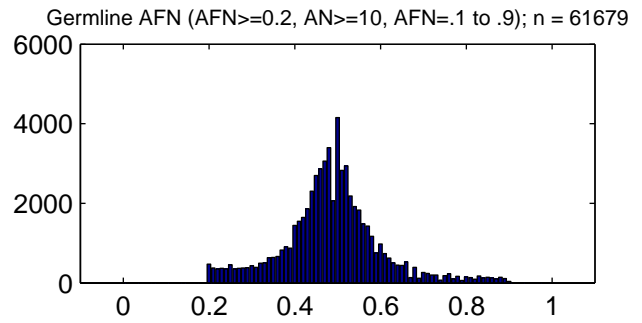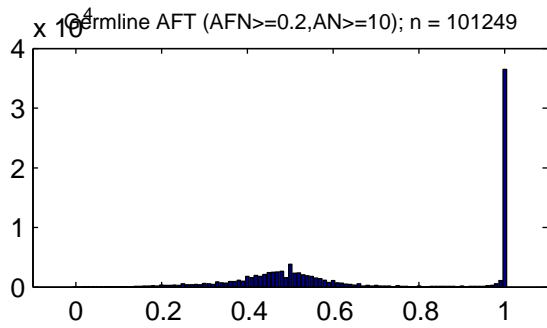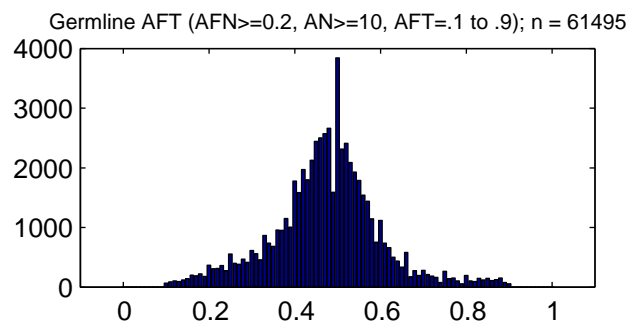

509\_ucsc.edu\_BRCA.IlluminaGA\_DNASeq.Level\_2.10.0.0 -- TCGA-BH-A0HI\_D

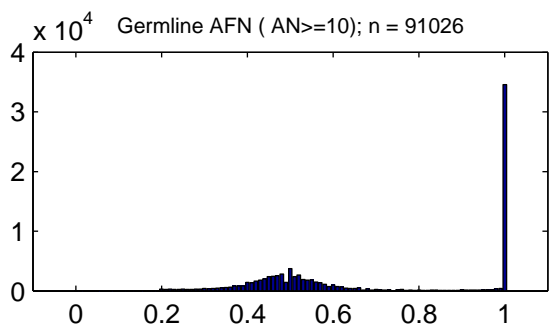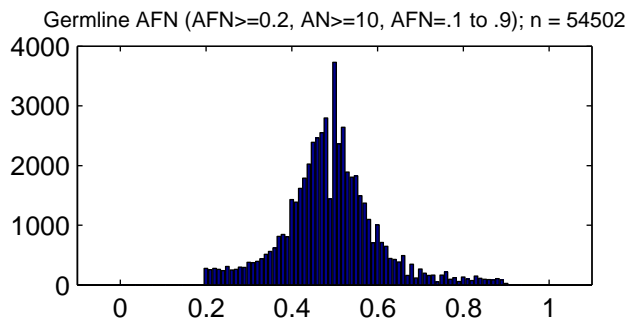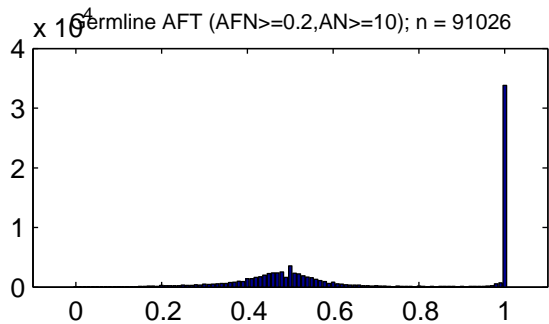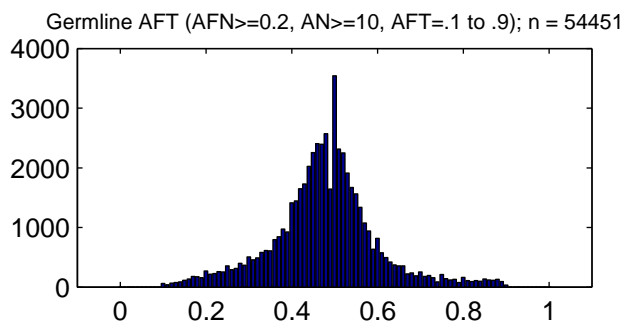

510\_ucsc.edu\_BRCA.IlluminaGA\_DNASeq.Level\_2.13.0.0 -- TCGA-E2-A156\_D

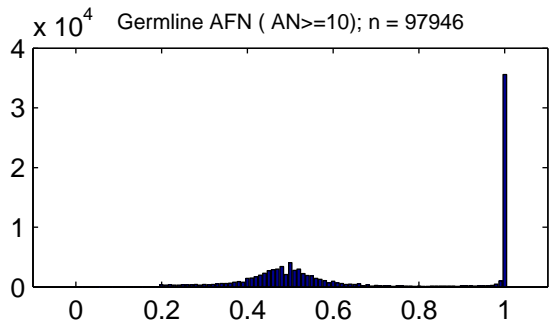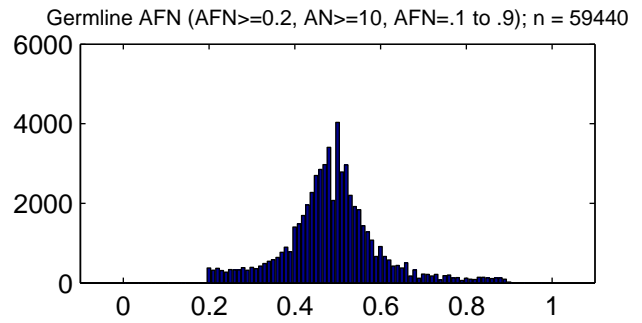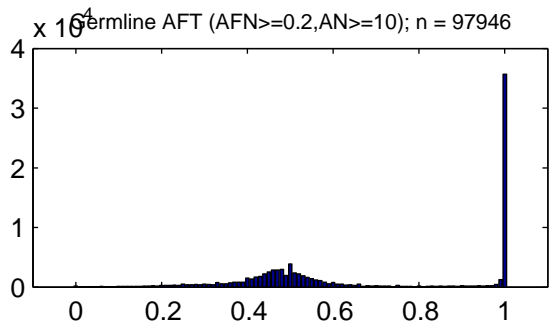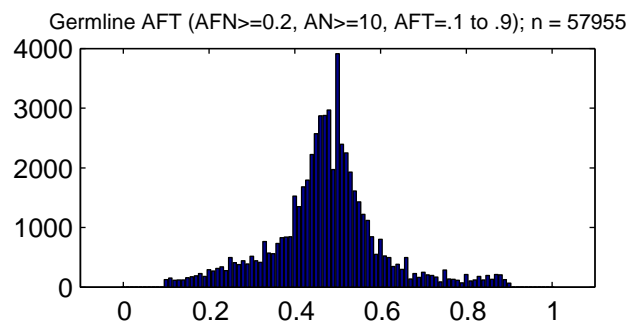

511\_ucsc.edu\_BRCA.IlluminaGA\_DNASeq.Level\_2.2.0.0 -- TCGA-A2-A0EW\_D

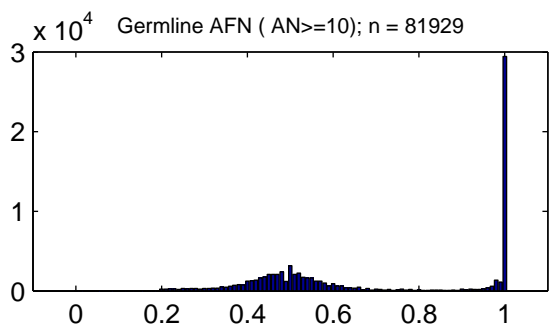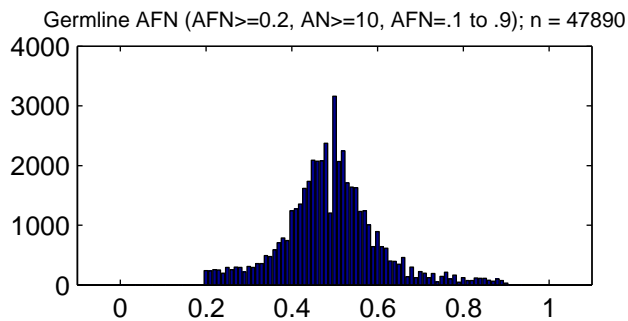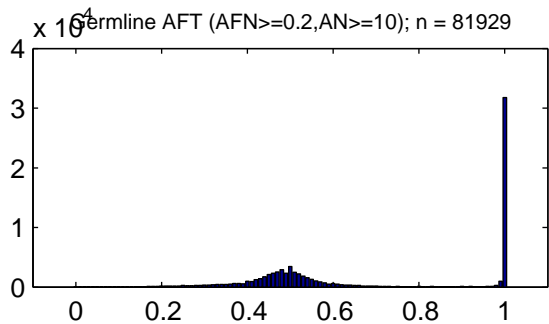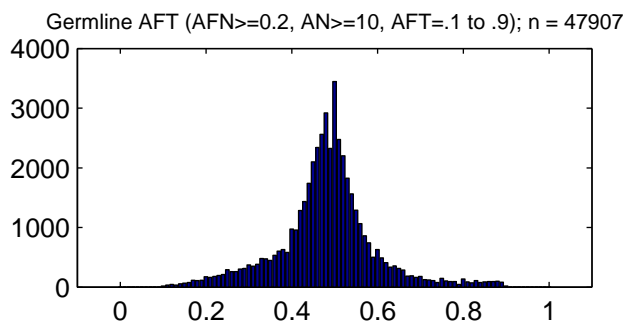



512\_ucsc.edu\_BRCA.IlluminaGA\_DNASeq.Level\_2.11.0.0 -- TCGA-C8-A133\_D

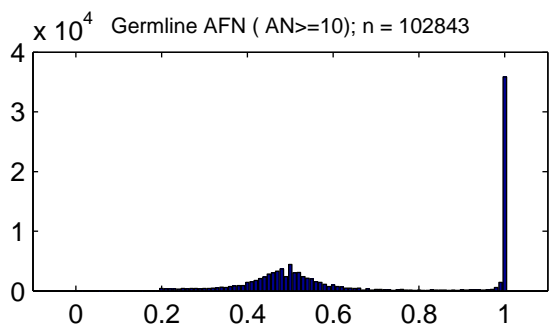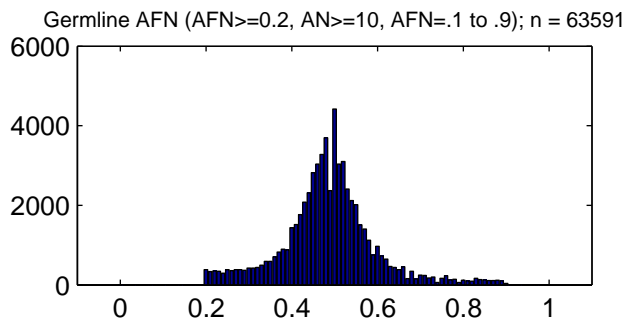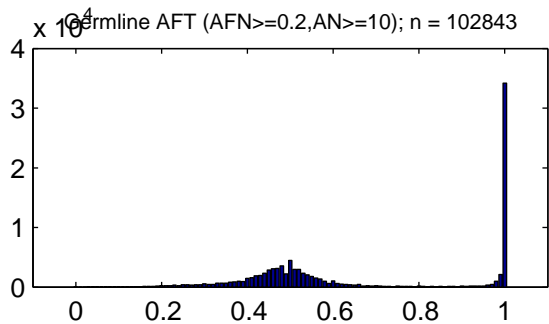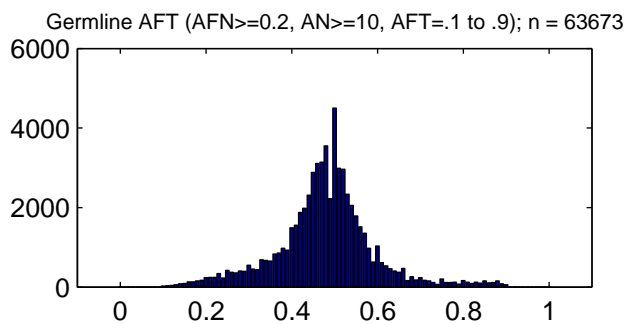

513\_ucsc.edu\_BRCA.IlluminaGA\_DNASeq.Level\_2.13.0.0 -- TCGA-E2-A1B6\_C

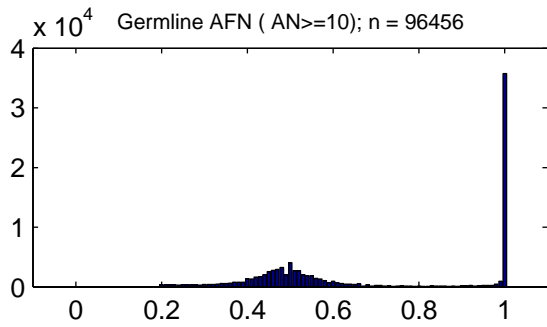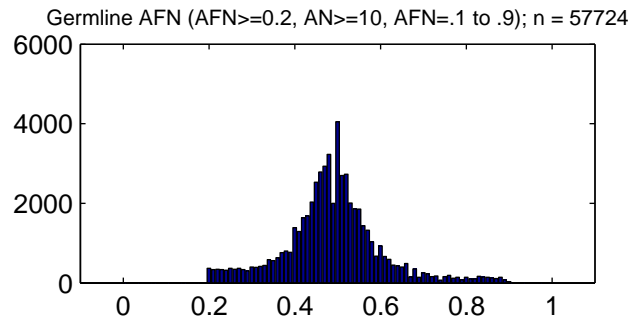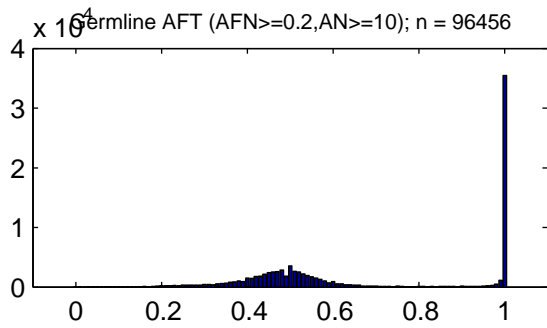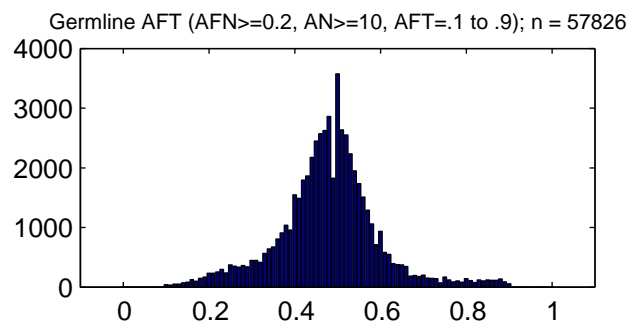

514\_ucsc.edu\_BRCA.IlluminaGA\_DNASeq.Level\_2.2.0.0 -- TCGA-A2-A0YK\_D

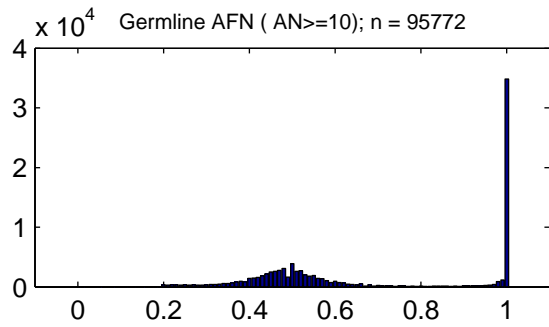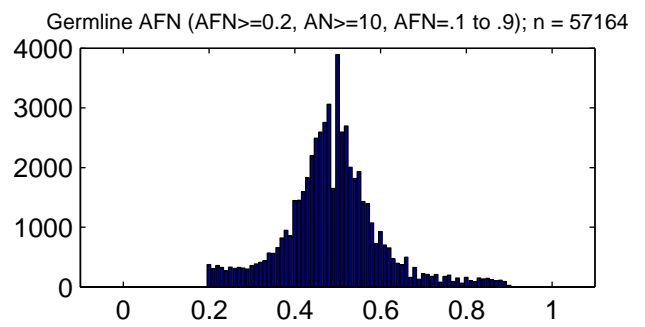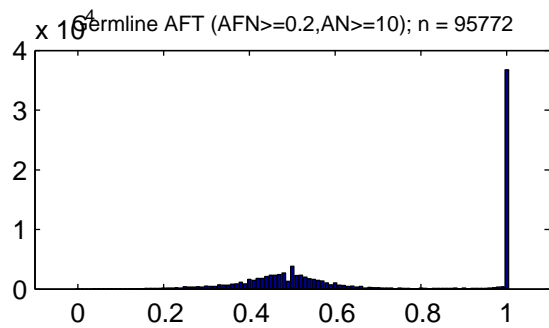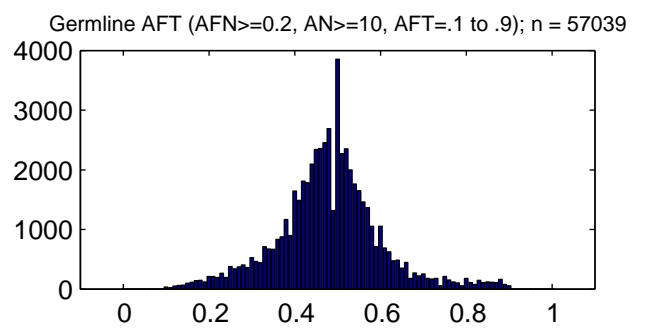

515\_ucsc.edu\_BRCA.IlluminaGA\_DNASeq.Level\_2.2.0.0 -- TCGA-A2-A0YL\_D

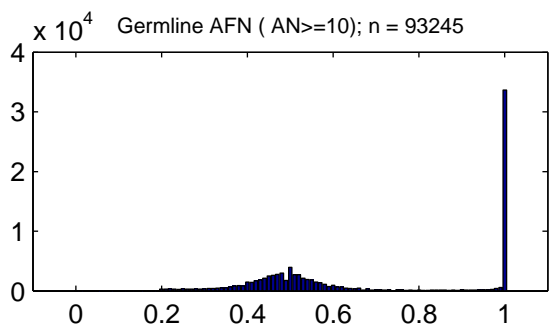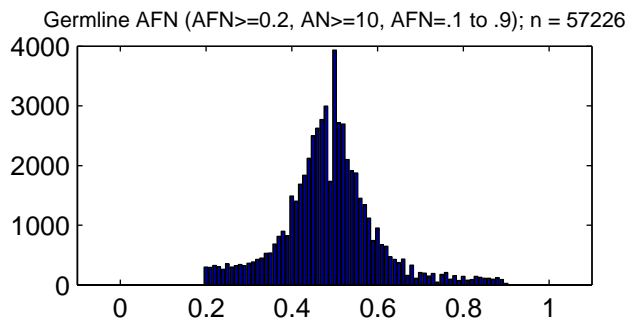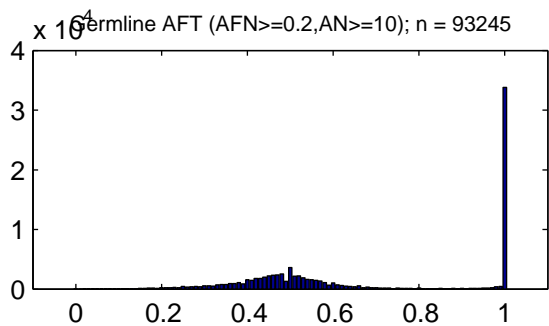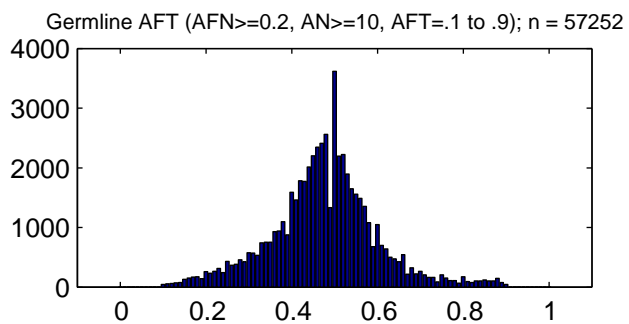

516\_ucsc.edu\_BRCA.IlluminaGA\_DNASeq.Level\_2.8.0.0 -- TCGA-AR-A1AX\_D

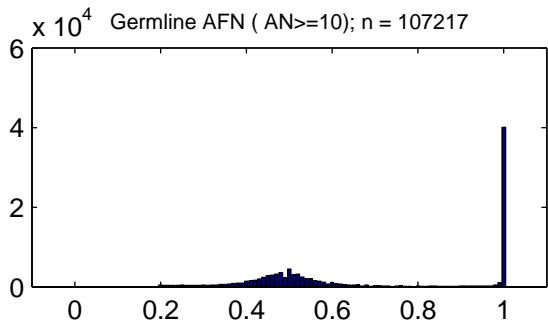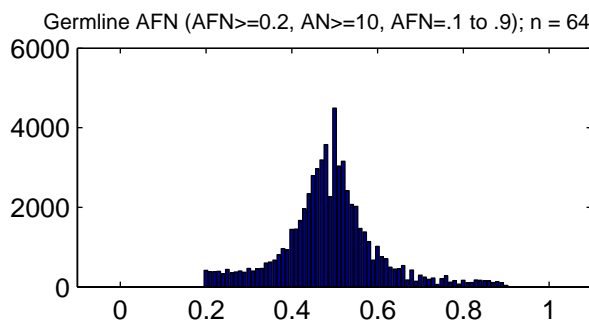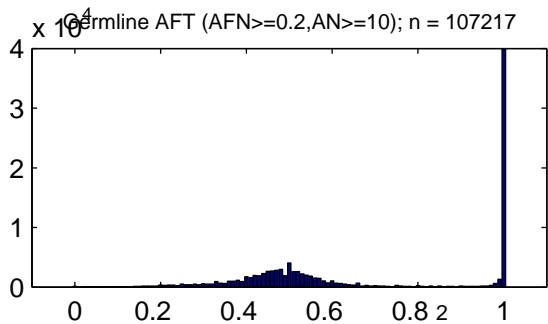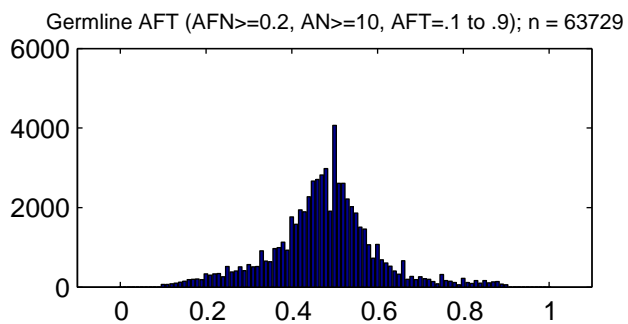

517\_ucsc.edu\_BRCA.IlluminaGA\_DNASeq.Level\_2.12.0.0 -- TCGA-D8-A145\_D

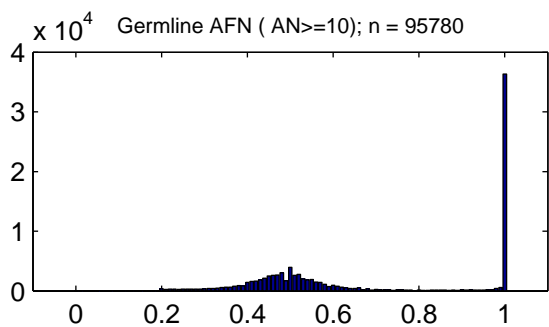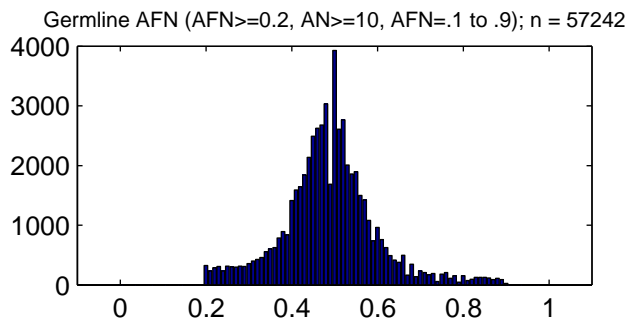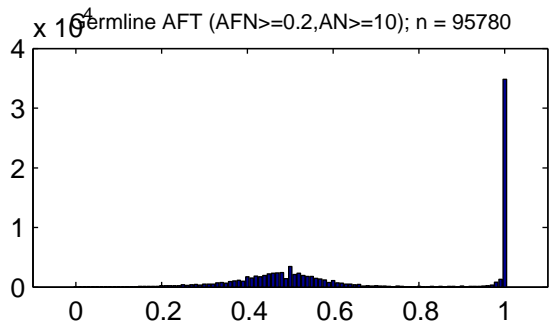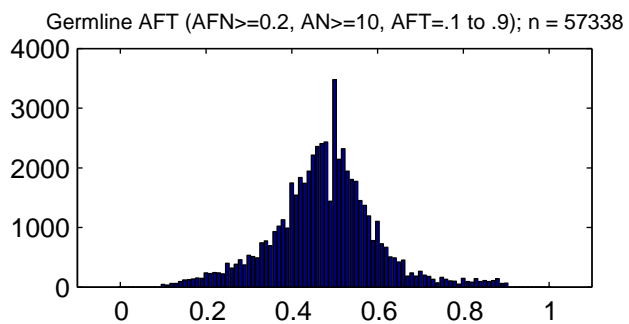

518\_ucsc.edu\_BRCA.IlluminaGA\_DNASeq.Level\_2.13.0.0 -- TCGA-E2-A15L\_D

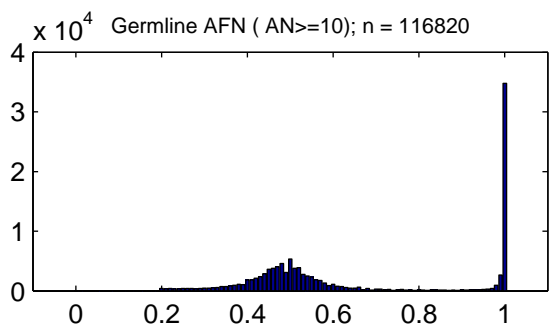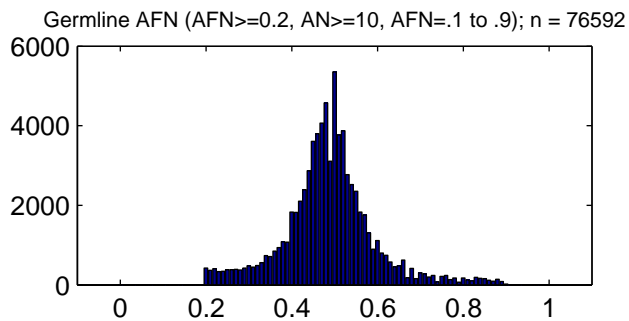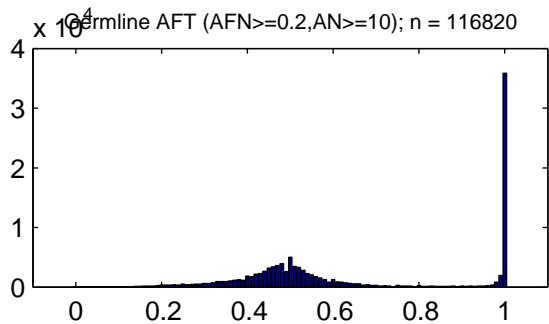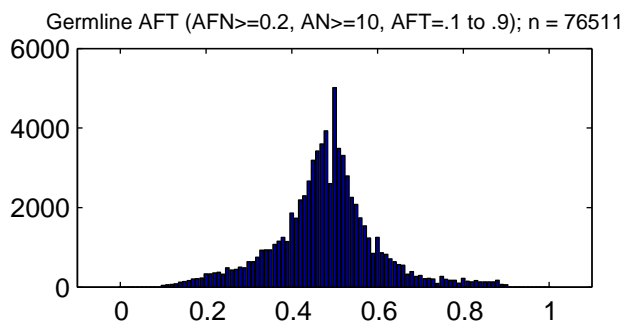

519\_ucsc.edu\_BRCA.IlluminaGA\_DNASeq.Level\_2.9.0.0 -- TCGA-B6-A0RQ\_D

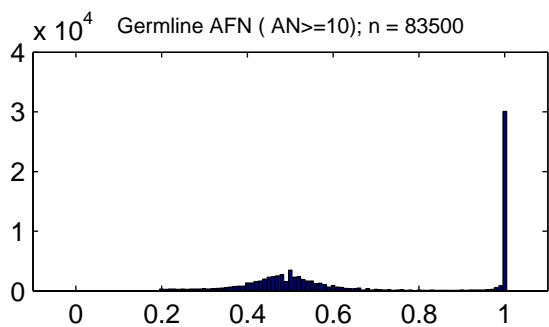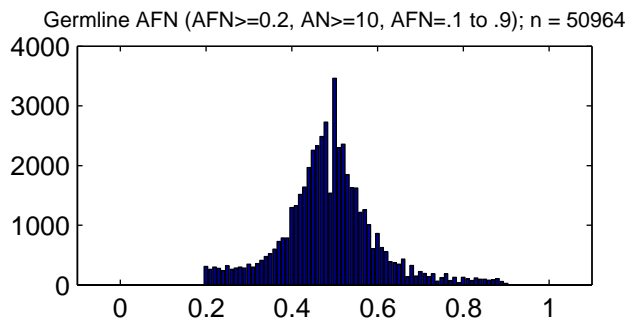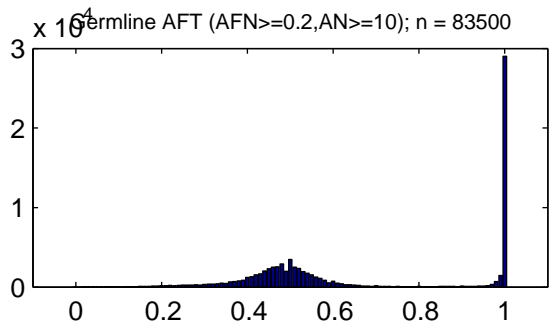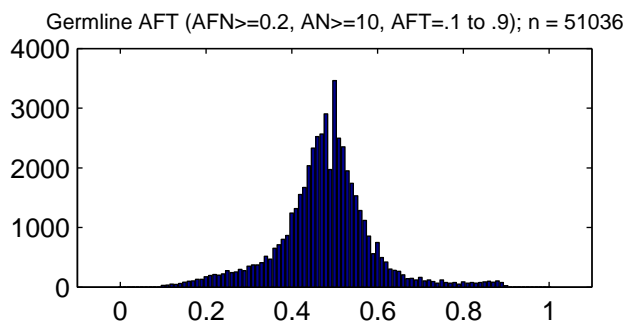



520\_ucsc.edu\_BRCA.IlluminaGA\_DNASeq.Level\_2.10.0.0 -- TCGA-BH-A0BQ\_I

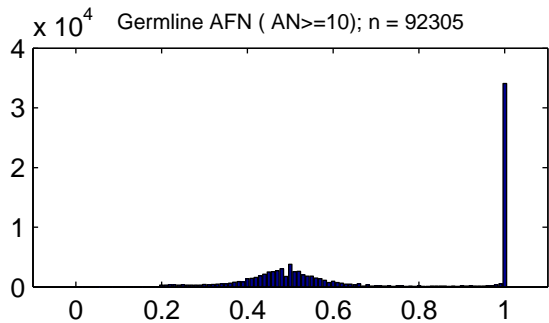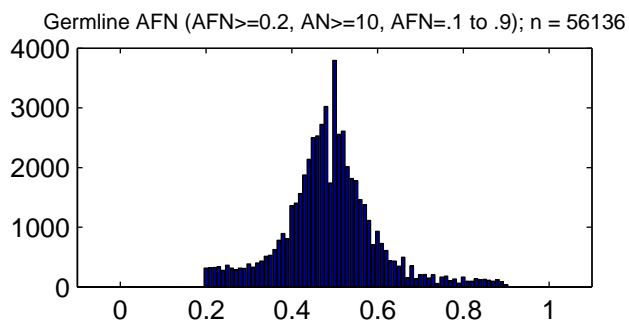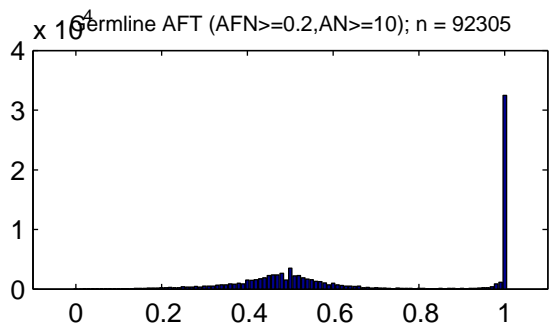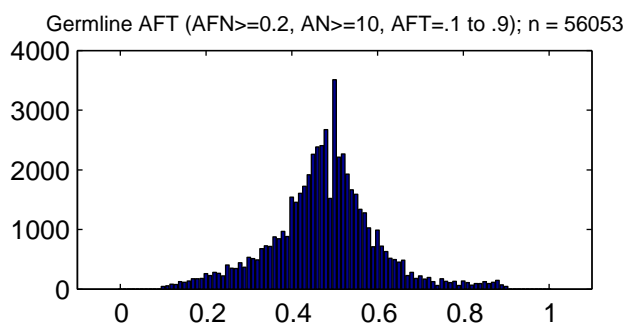

521\_ucsc.edu\_BRCA.IlluminaGA\_DNASeq.Level\_2.10.0.0 -- TCGA-BH-A0H5\_C

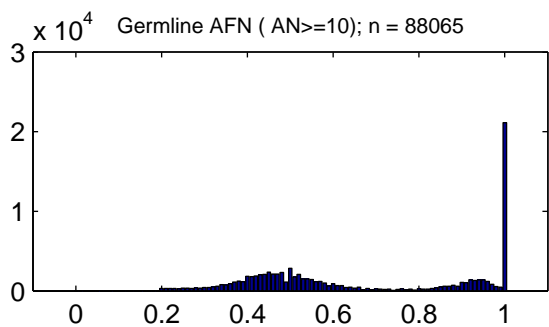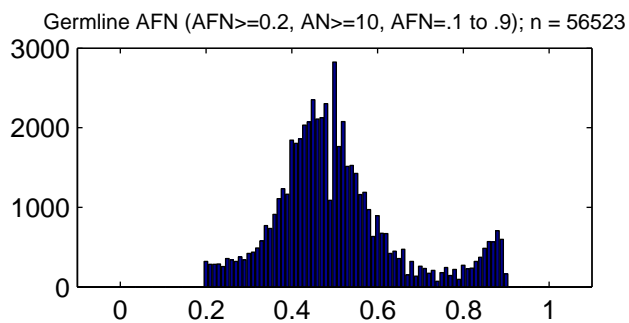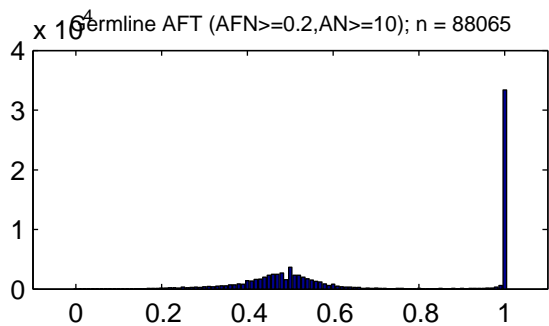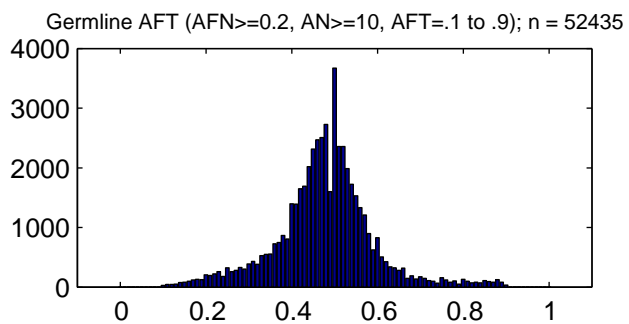

522\_ucsc.edu\_BRCA.IlluminaGA\_DNASeq.Level\_2.6.0.0 -- TCGA-AO-A12H\_D

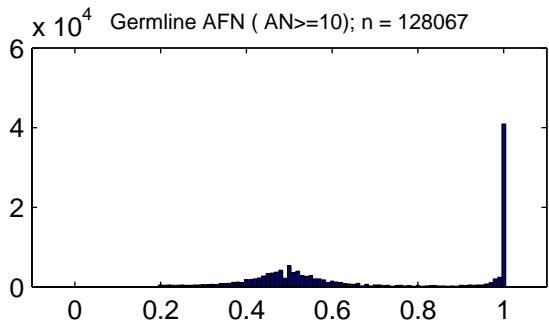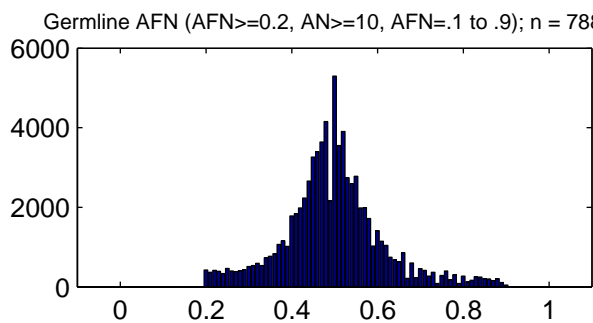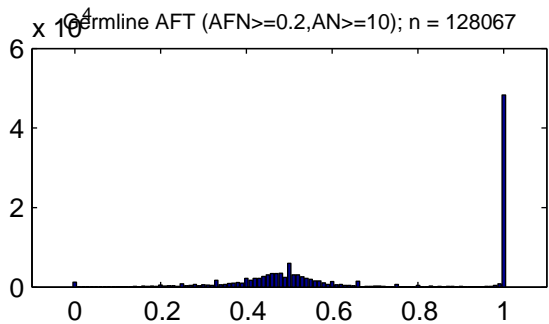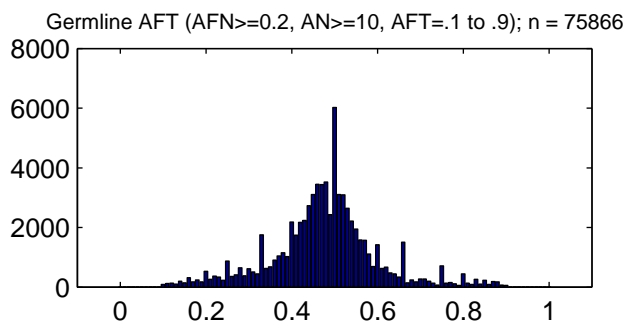

Supplement: NIHMS973253-supplement-6.pdf [file NIHMS973253-supplement-6.pdf]
