# Supplementary material for: Identification of Drivers of Aneuploidy in Breast Tumors
Source: PubMed Central journal article supplement — Cell Rep. Author manuscript; Available in PMC 2018 Jun 12. (PMC5997284; doi:10.1016/j.celrep.2018.04.102), 2018-05-29

Supplemental Plots 2: Replotting AAF vs Chromosome Position. Each of the following pages contains the plots AAF on the y-axis and chromosome position on the x-axis. This representation of the data allows us to examine each of the 522 tumors and determine which chromosomes had undergone a loss of whole or partial loss. Each SNP is plotted as a black dot within the dashed lines representing the boundaries of each chromosome. In the example shown below (tumor ranked #16), reading the graph from left to right, we see a partial loss of chromosome one. Near the left dotted line of chromosome 1 the black dots of SNPs are mostly seen clustered around AAFs of 0 and 1. Conversely, near the right dotted line, the SNP dots are clustered around an AAF of 0.5. This we defined as a partial chromosome loss. Looking at the area of chromosomes 2, 3, and 4, we see that the area of AAF frequency 0.5 is sparsely labeled, with again most of the dots clustered around 0 and 1. This we defined as a whole chromosome loss. Chromosomes that had most SNPs clustered around AAF of 0.5 were considered normal (in this example, chromosome 5). Analysis of all 522 of these plots generated the graph in Supplementary Figure 5.

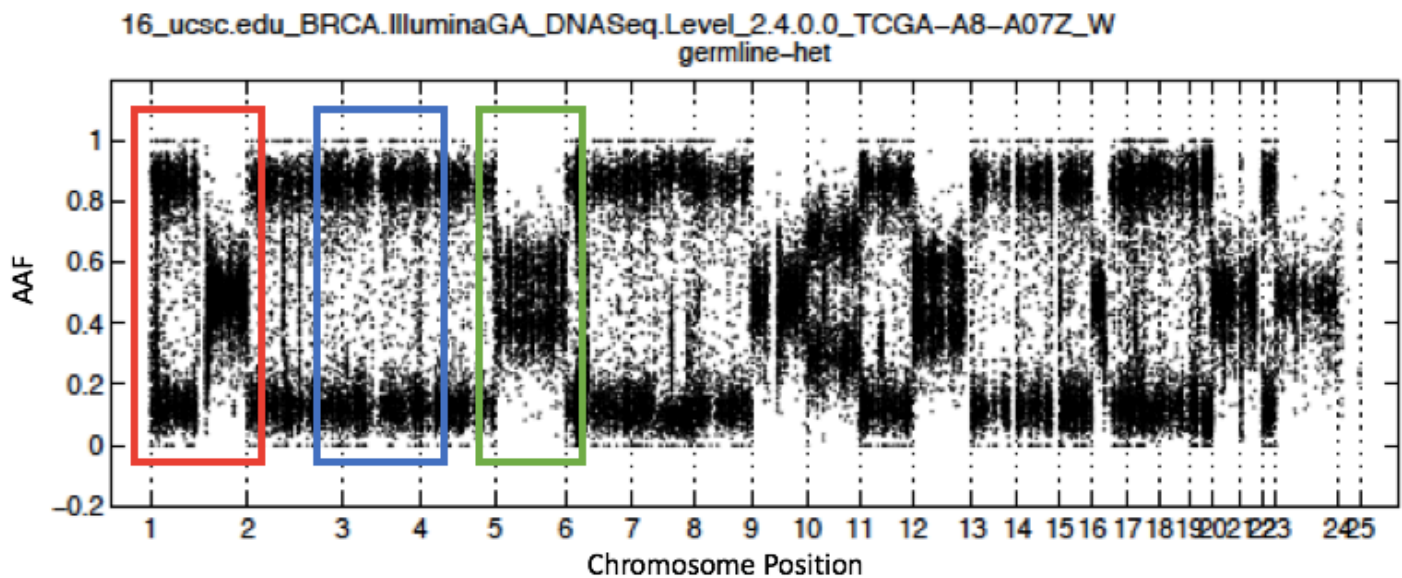

**Partial Loss of Chromosome 1, Whole Loss of Chromosome 3, Normal Chromosome 5**

1\_ucsc.edu\_BRCA.IlluminaGA\_DNASeq.Level\_2.14.0.0\_TCGA-A8-A07R\_W  
germline-het

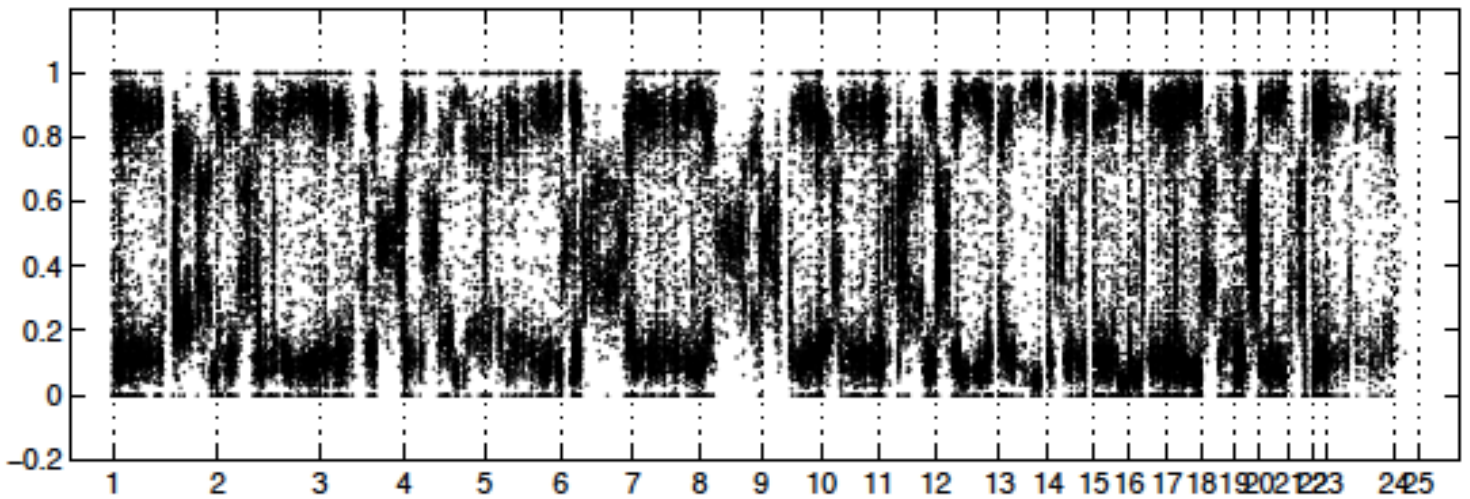

2\_ucsc.edu\_BRCA.IlluminaGA\_DNASeq.Level\_2.14.0.0\_TCGA-A8-A07C\_W  
germline-het

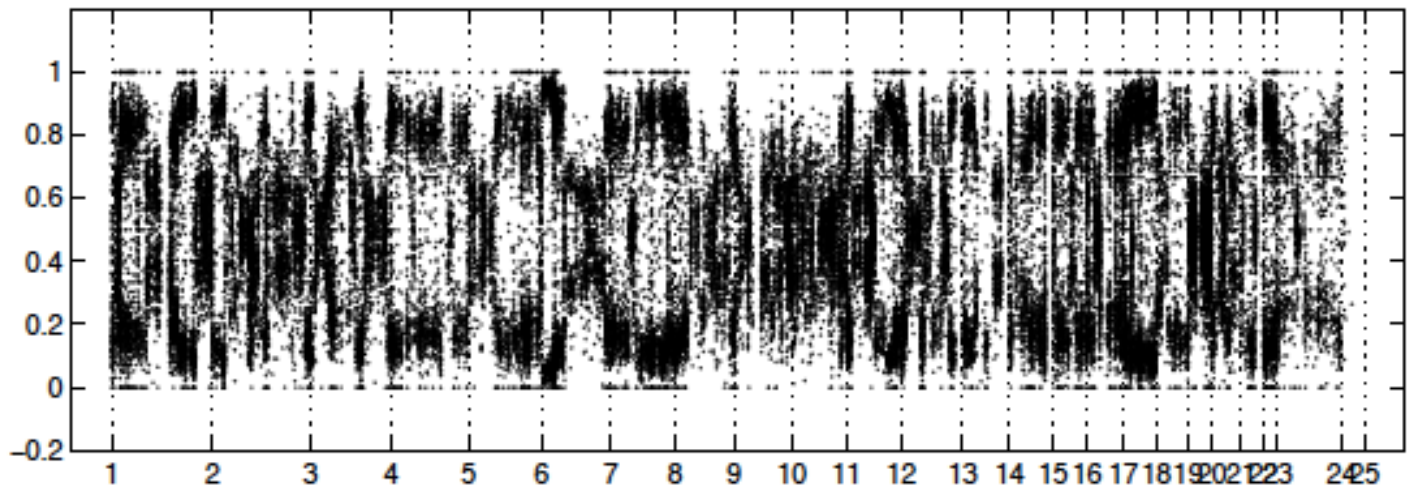

3\_ucsc.edu\_BRCA.IlluminaGA\_DNASeq.Level\_2.6.0.0\_TCGA-A0-A124\_D  
germline-het

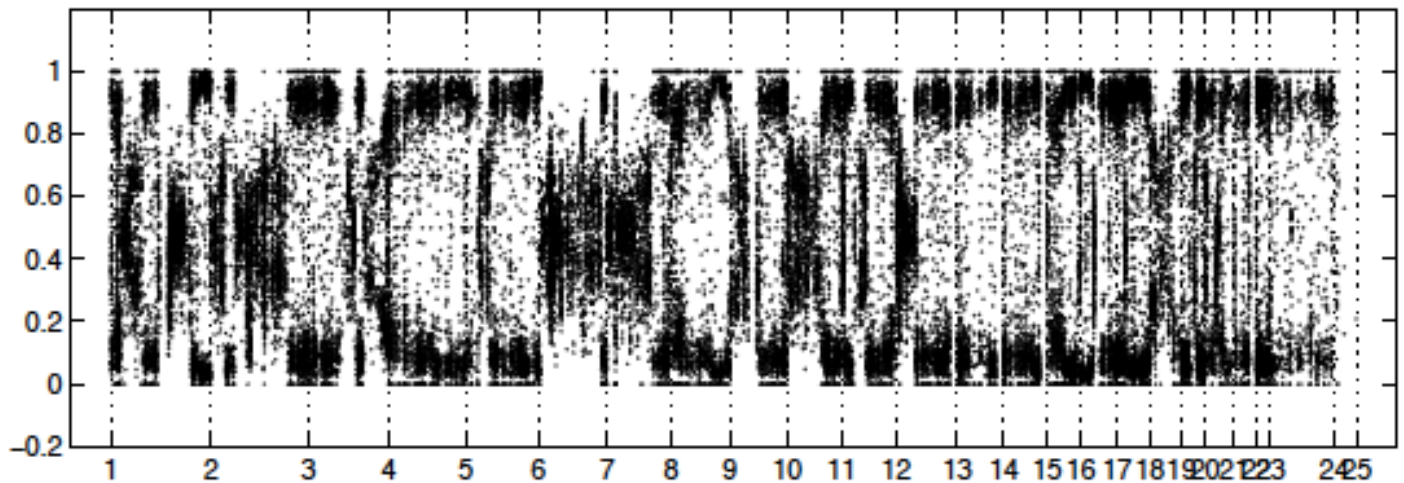

4\_ucsc.edu\_BRCA.IlluminaGA\_DNASeq.Level\_2.1.0.0\_TCGA-A1-A0SO\_D  
germline-het

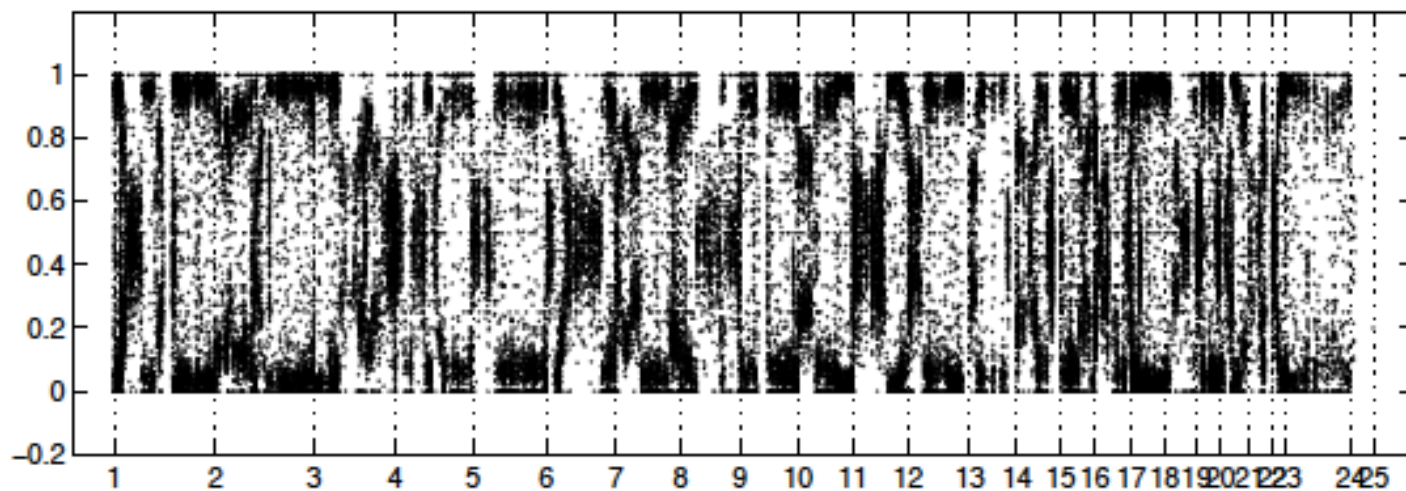

5\_ucsc.edu\_BRCA.IlluminaGA\_DNASeq.Level\_2.9.0.0\_TCGA-B6-A0X1\_D  
germline-het

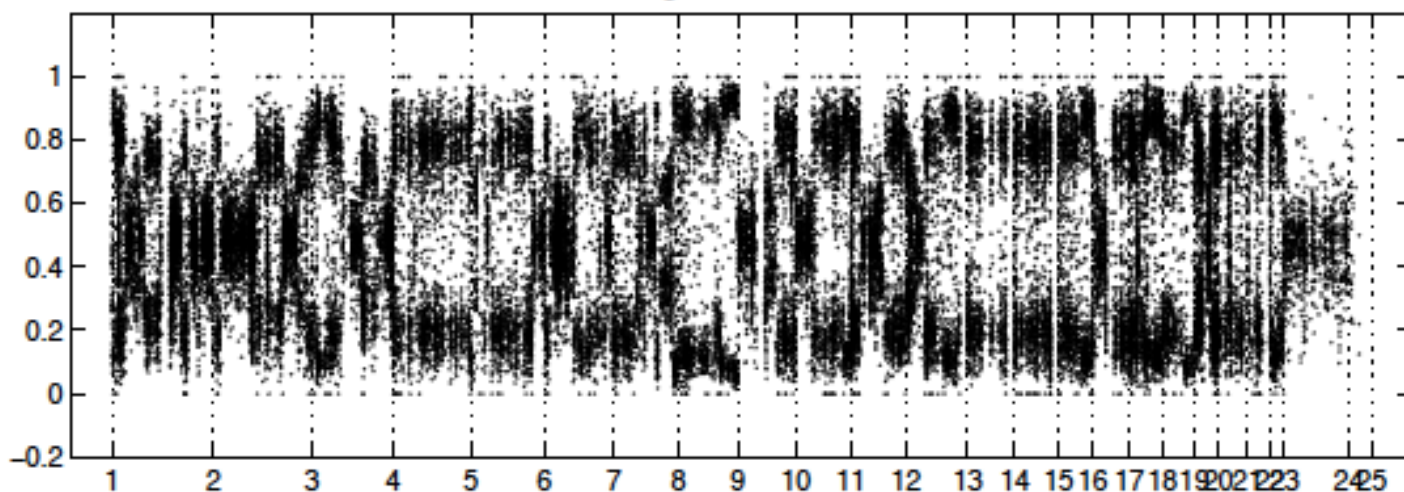

6\_ucsc.edu\_BRCA.IlluminaGA\_DNASeq.Level\_2.3.0.0\_TCGA-A7-A13D\_D  
germline-het

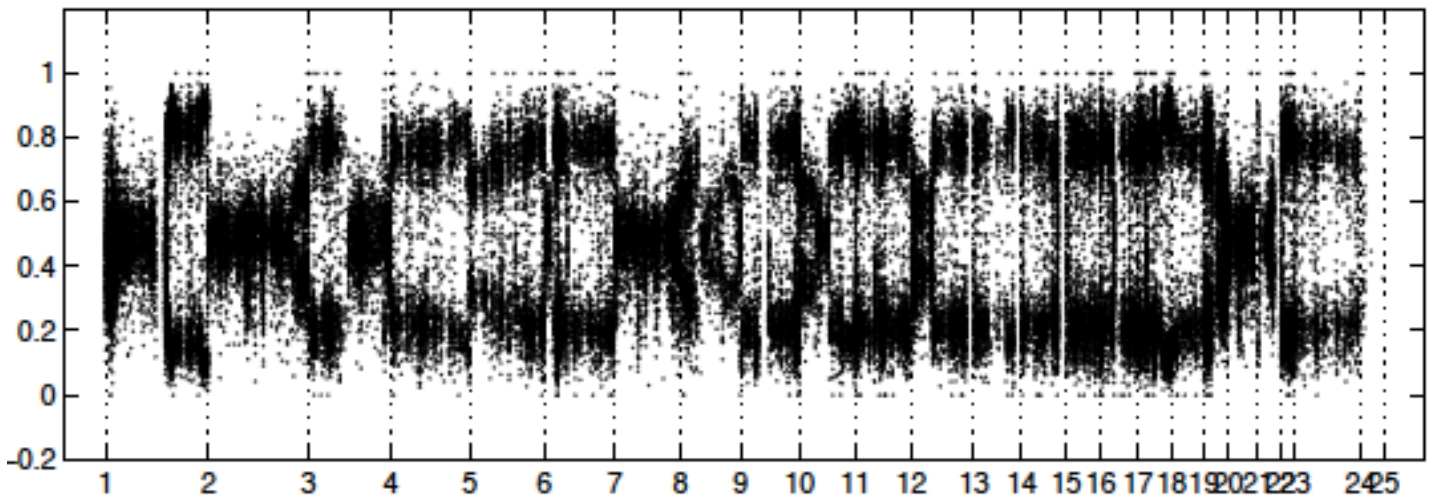

7\_ucsc.edu\_BRCA.IlluminaGA\_DNASeq.Level\_2.2.0.0\_TCGA-A2-A04U\_D  
germline-het

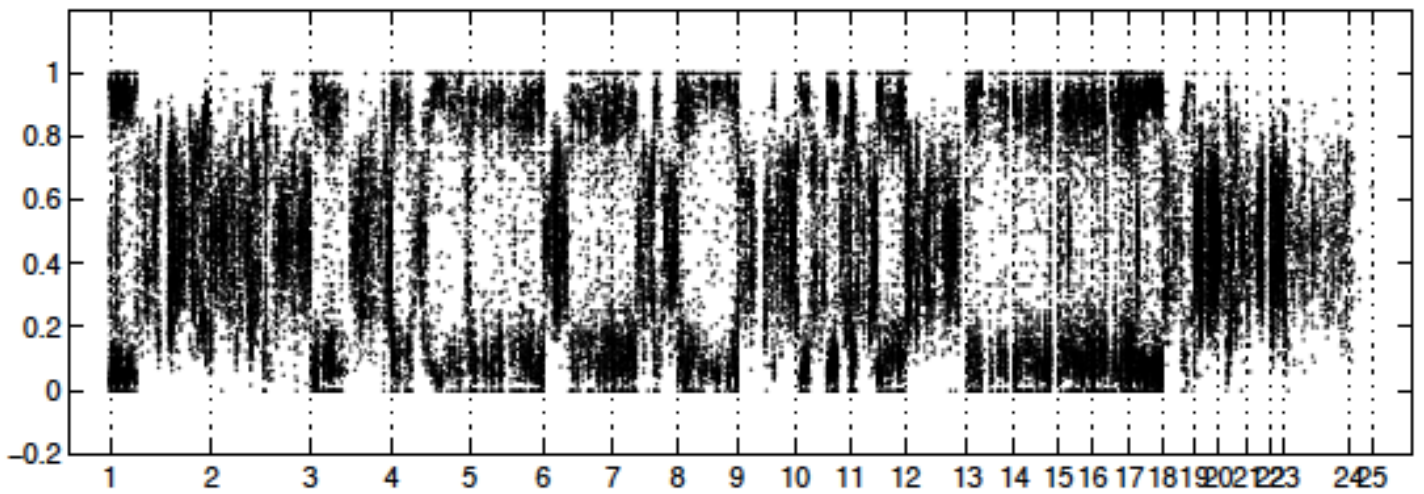

8\_ucsc.edu\_BRCA.IlluminaGA\_DNASeq.Level\_2.14.0.0\_TCGA-A2-A0T2\_W  
germline-het

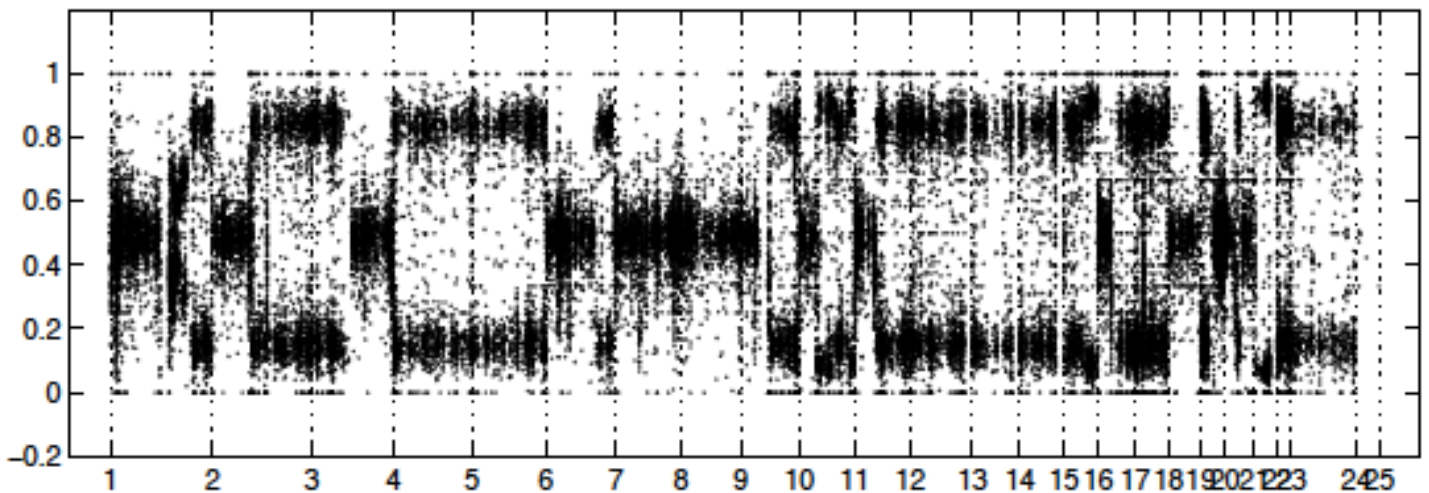

9\_ucsc.edu\_BRCA.IlluminaGA\_DNASeq.Level\_2.10.0.0\_TCGA-BH-A18T\_D  
germline-het

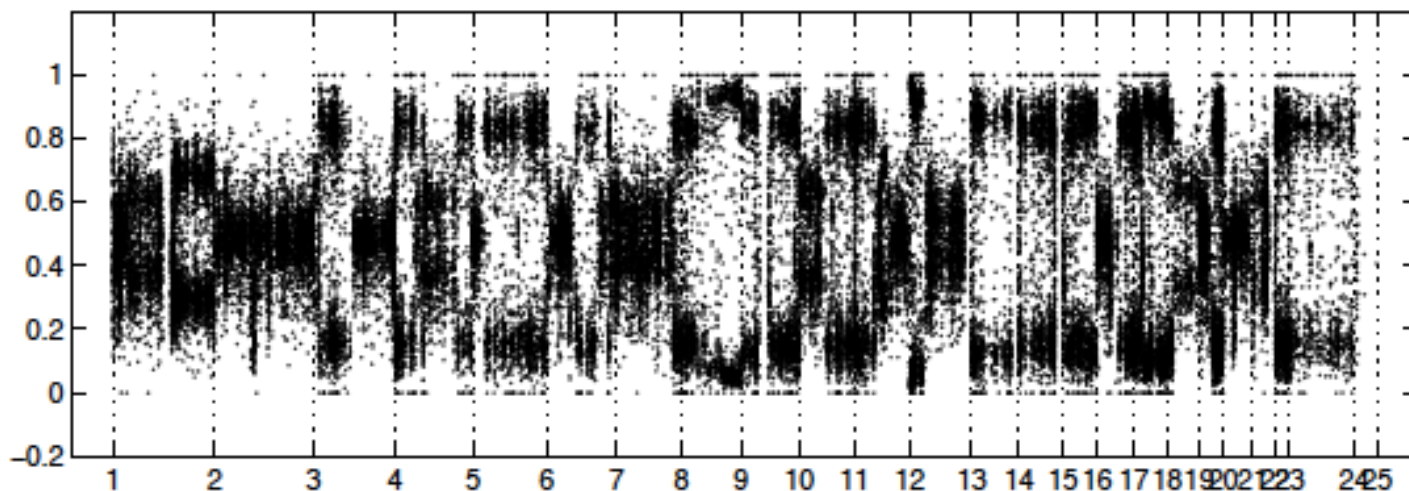

10\_ucsc.edu\_BRCA.IlluminaGA\_DNASeq.Level\_2.2.0.0\_TCGA-A2-A0YM\_D  
germline-het

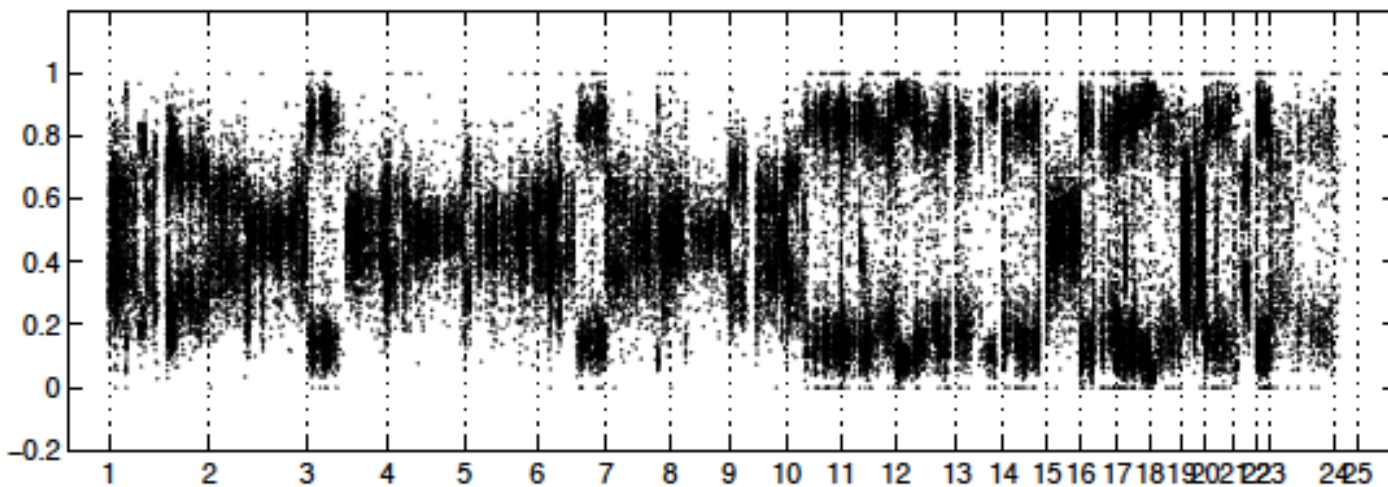

11\_ucsc.edu\_BRCA.IlluminaGA\_DNASeq.Level\_2.13.0.0\_TCGA-E2-A10B\_D  
germline-het

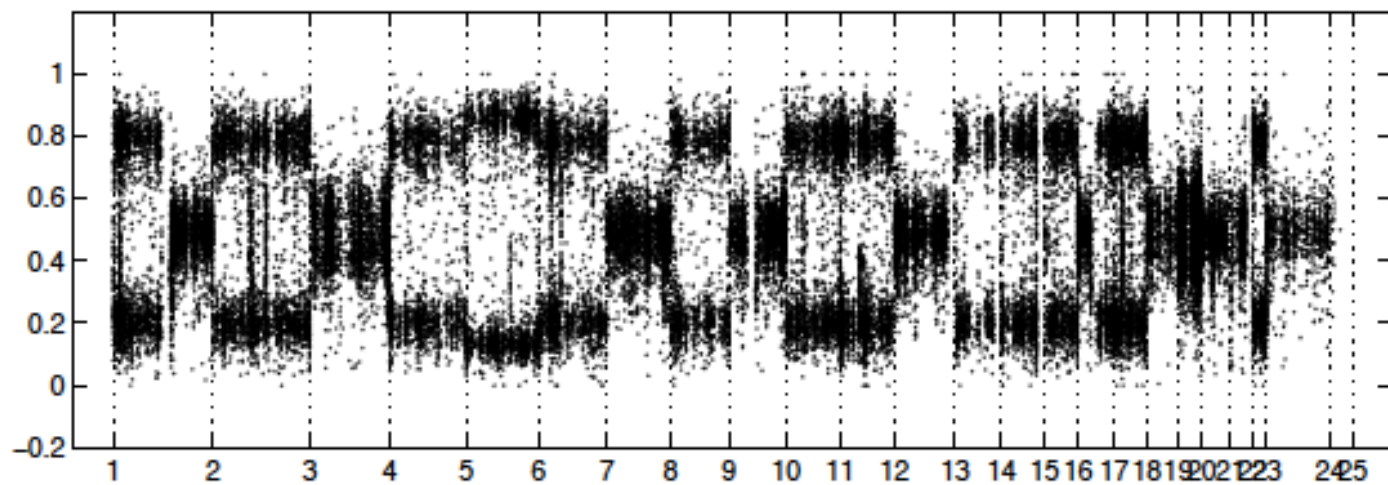

12\_ucsc.edu\_BRCA.IlluminaGA\_DNASeq.Level\_2.2.0.0\_TCGA-A2-A0YT\_D  
germline-het

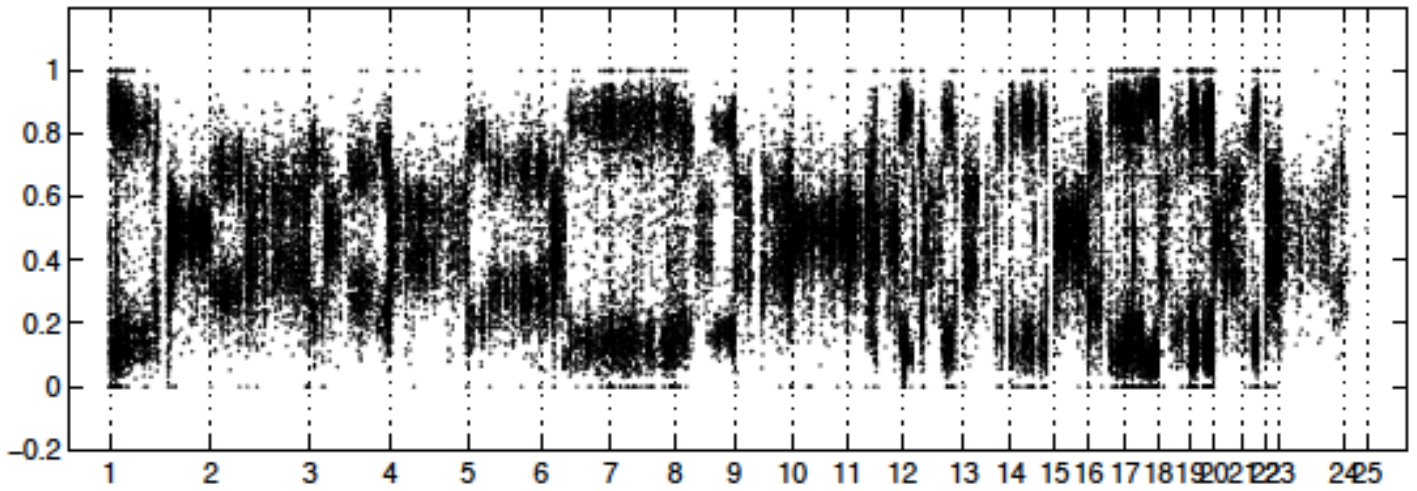

13\_ucsc.edu\_BRCA.IlluminaGA\_DNASeq.Level\_2.14.0.0\_TCGA-B6-A016\_W  
germline-het

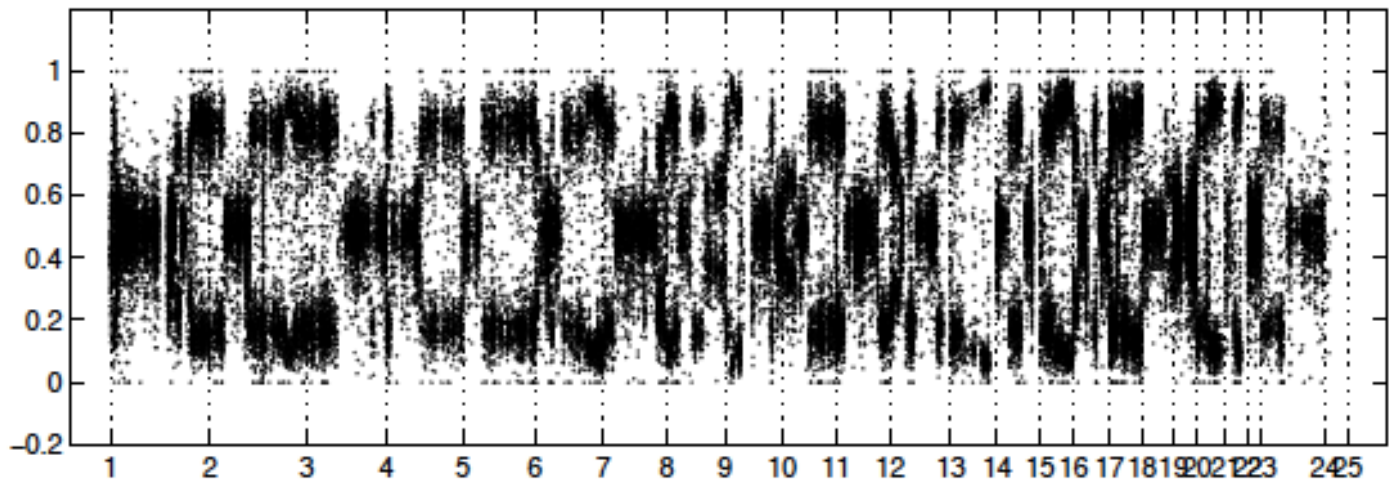

14\_ucsc.edu\_BRCA.IlluminaGA\_DNASeq.Level\_2.13.0.0\_TCGA-E2-A14R\_D  
germline-het

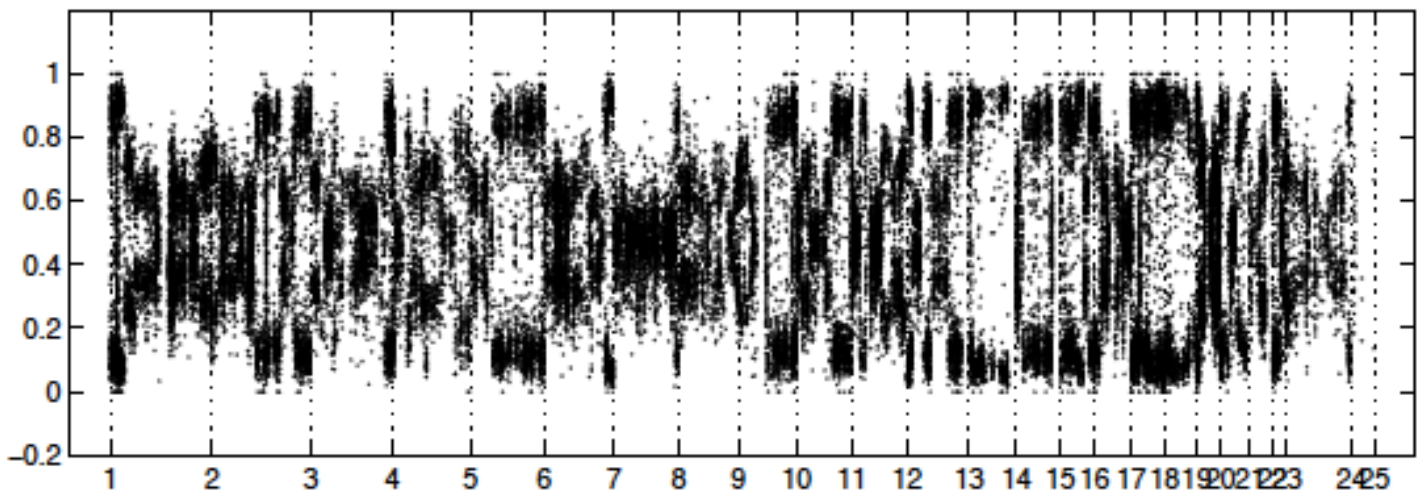

15\_ucsc.edu\_BRCA.IlluminaGA\_DNASeq.Level\_2.10.0.0\_TCGA-BH-A18V\_D  
germline-het

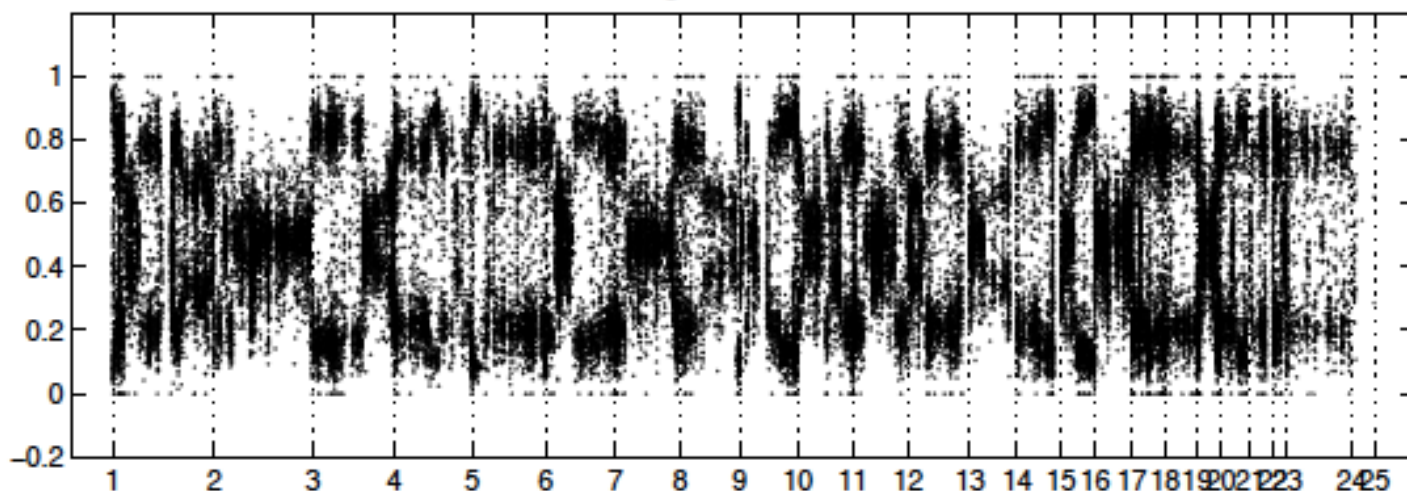

16\_ucsc.edu\_BRCA.IlluminaGA\_DNASeq.Level\_2.4.0.0\_TCGA-A8-A07Z\_W  
germline-het

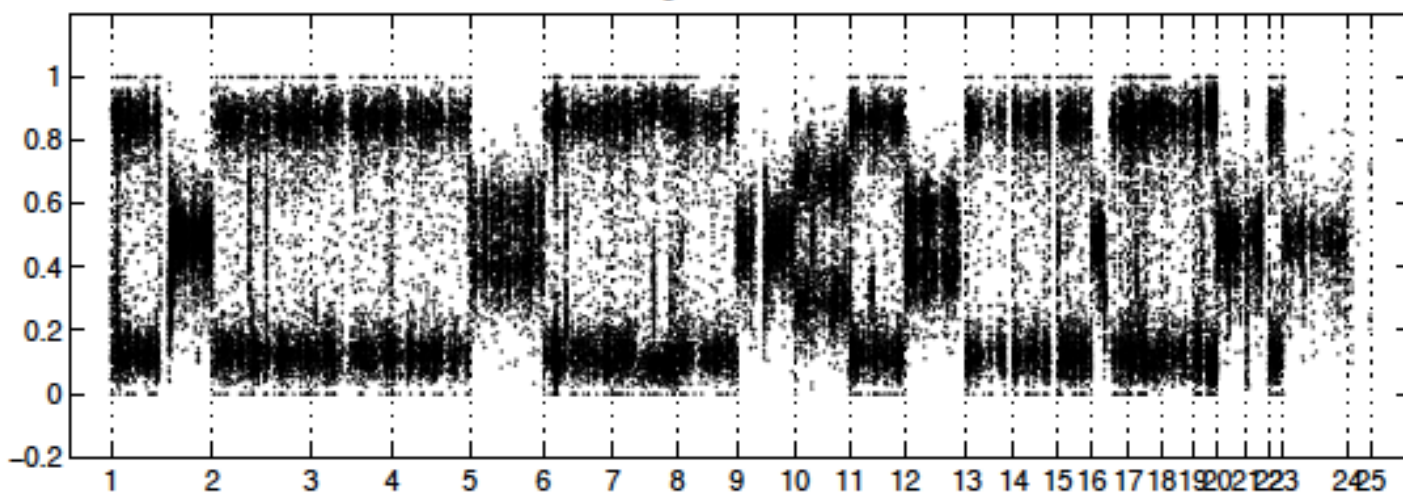

17\_ucsc.edu\_BRCA.IlluminaGA\_DNASeq.Level\_2.12.0.0\_TCGA-D8-A143\_D  
germline-het

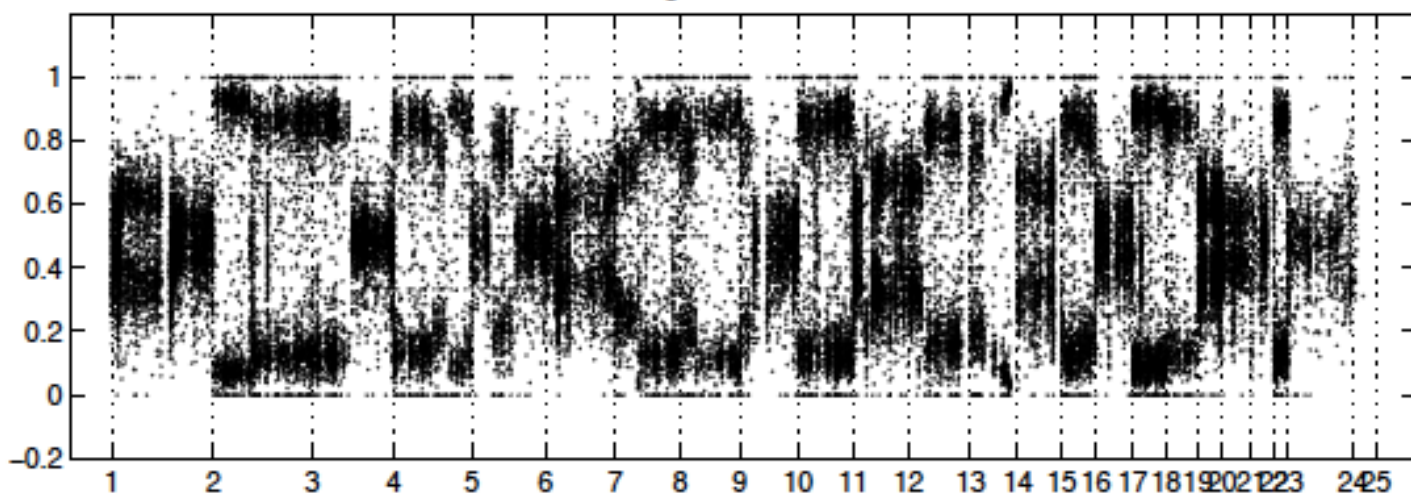

18\_ucsc.edu\_BRCA.IlluminaGA\_DNASeq.Level\_2.5.0.0\_TCGA-AN-A0XU\_D  
germline-het

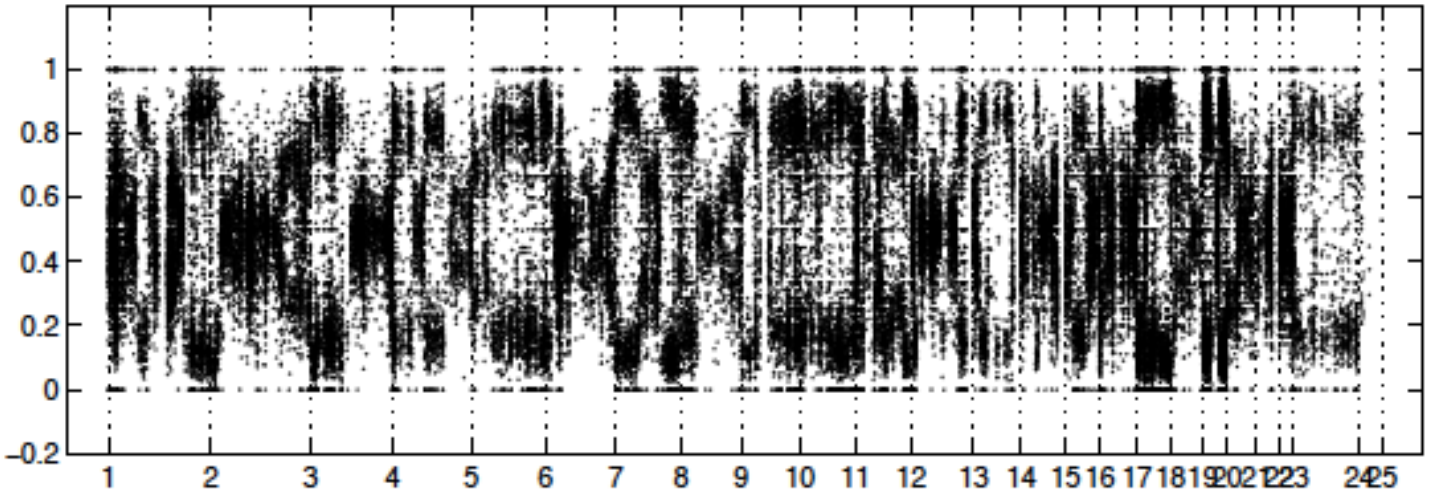

19\_ucsc.edu\_BRCA.IlluminaGA\_DNASeq.Level\_2.10.0.0\_TCGA-BH-A0WA\_D  
germline-het

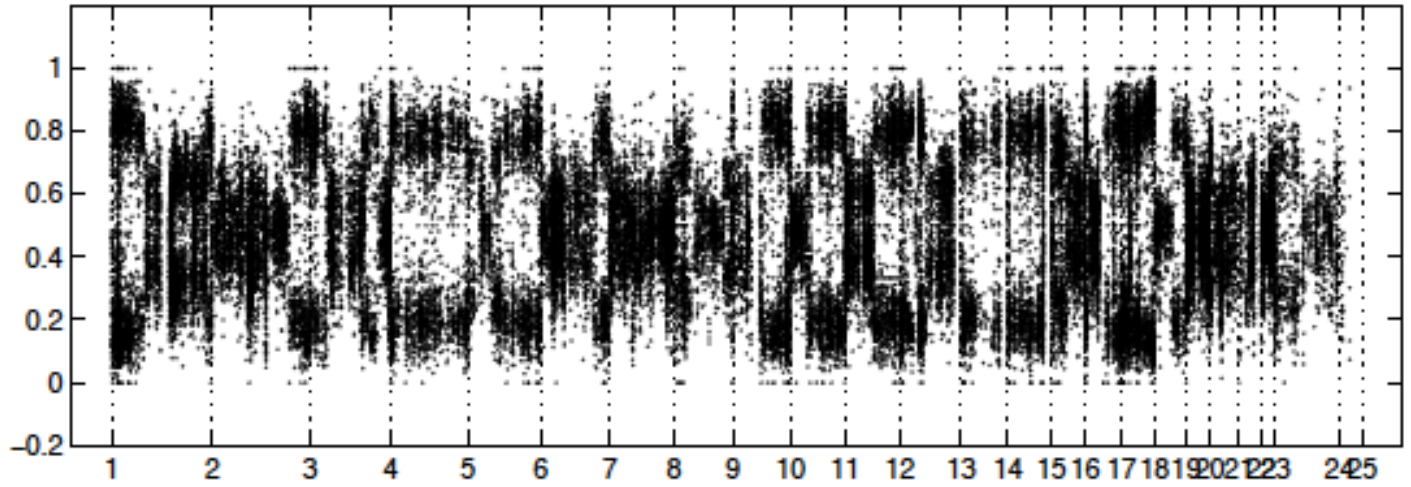

20\_ucsc.edu\_BRCA.IlluminaGA\_DNASeq.Level\_2.2.0.0\_TCGA-A2-A0D0\_W  
germline-het

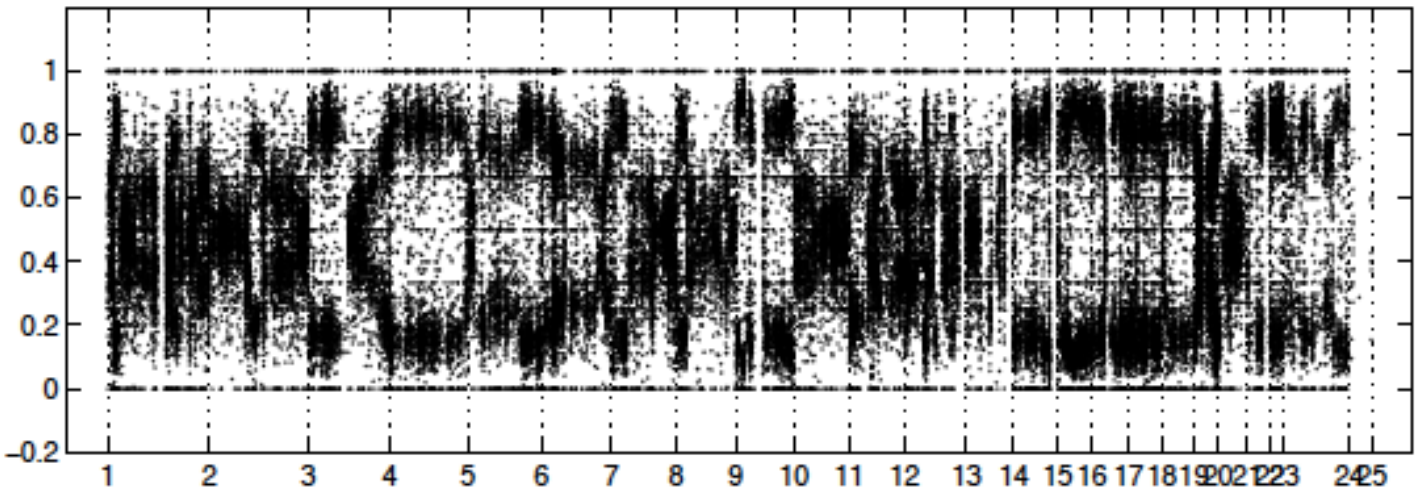



21\_ucsc.edu\_BRCA.IlluminaGA\_DNASeq.Level\_2.6.0.0\_TCGA-AO-A12F\_D  
germline-het

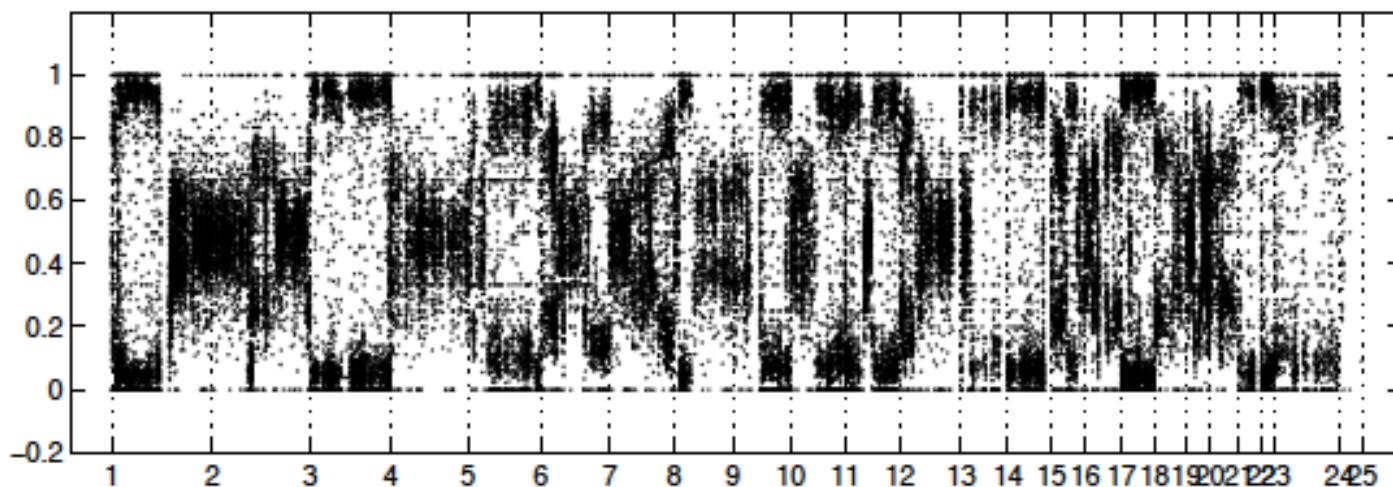

22\_ucsc.edu\_BRCA.IlluminaGA\_DNASeq.Level\_2.8.0.0\_TCGA-AR-A0TU\_D  
germline-het

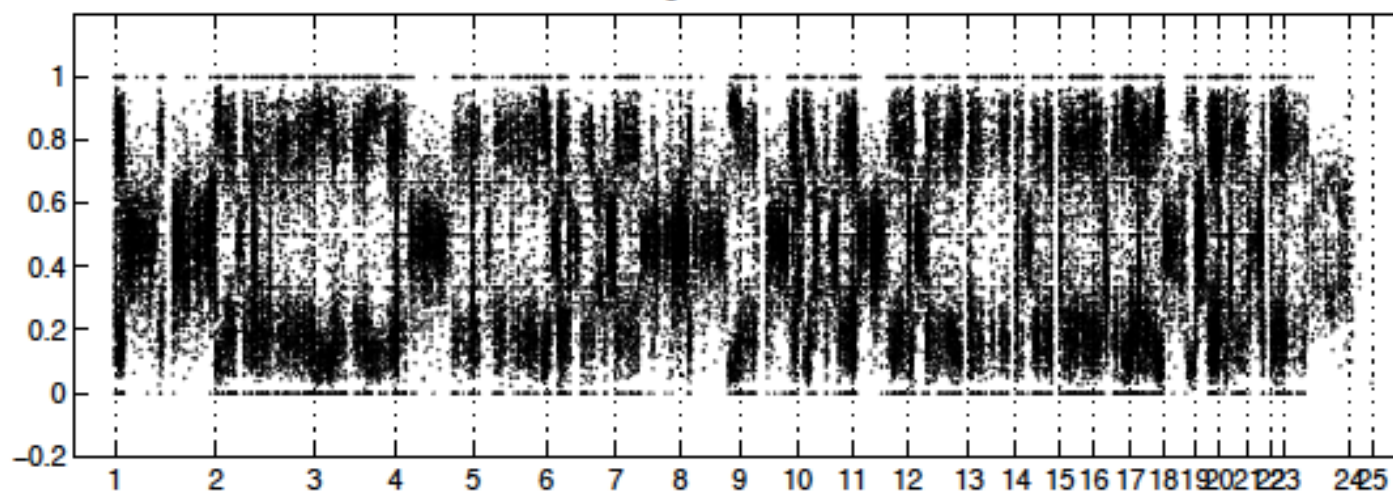

23\_ucsc.edu\_BRCA.IlluminaGA\_DNASeq.Level\_2.9.0.0\_TCGA-B6-A016\_W  
germline-het

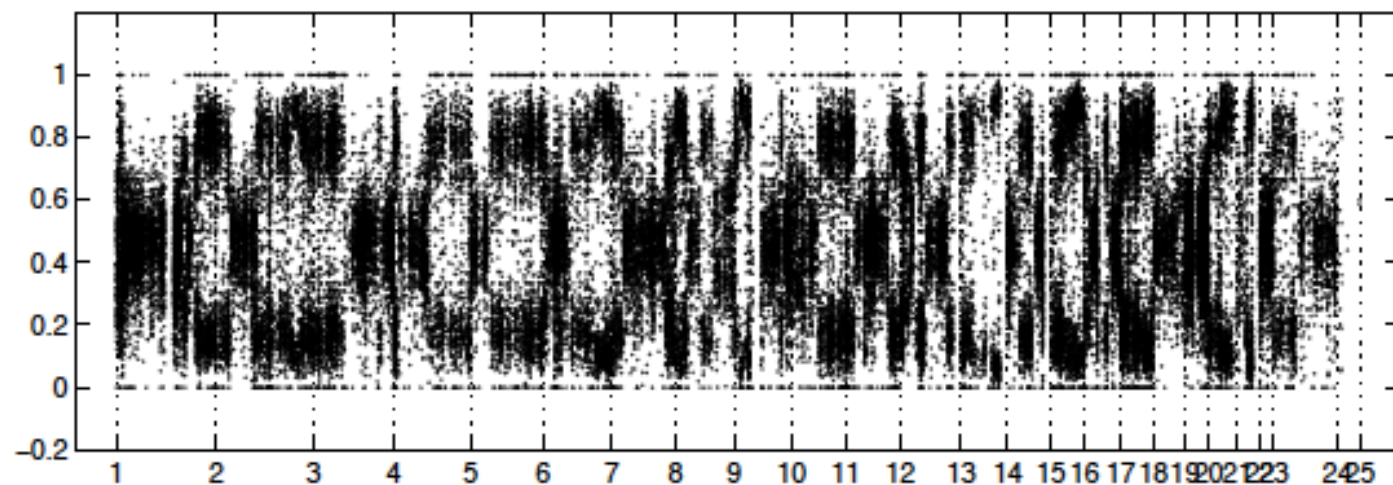

24\_ucsc.edu\_BRCA.IlluminaGA\_DNASeq.Level\_2.8.0.0\_TCGA-AR-A1AY\_D  
germline-het

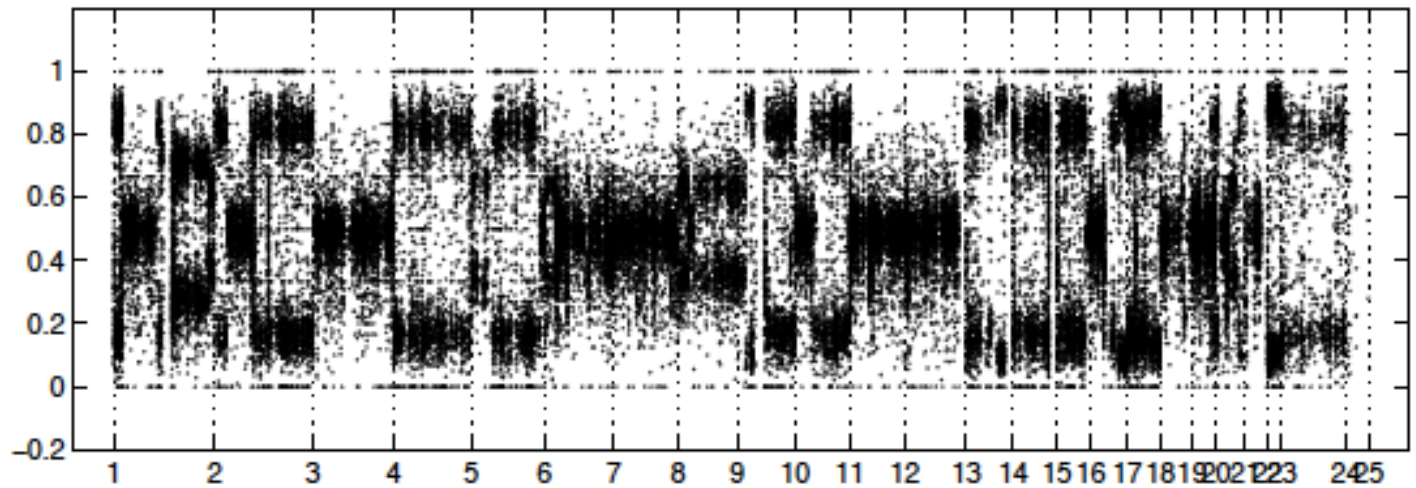

25\_ucsc.edu\_BRCA.IlluminaGA\_DNASeq.Level\_2.14.0.0\_TCGA-A8-A06R\_W  
germline-het

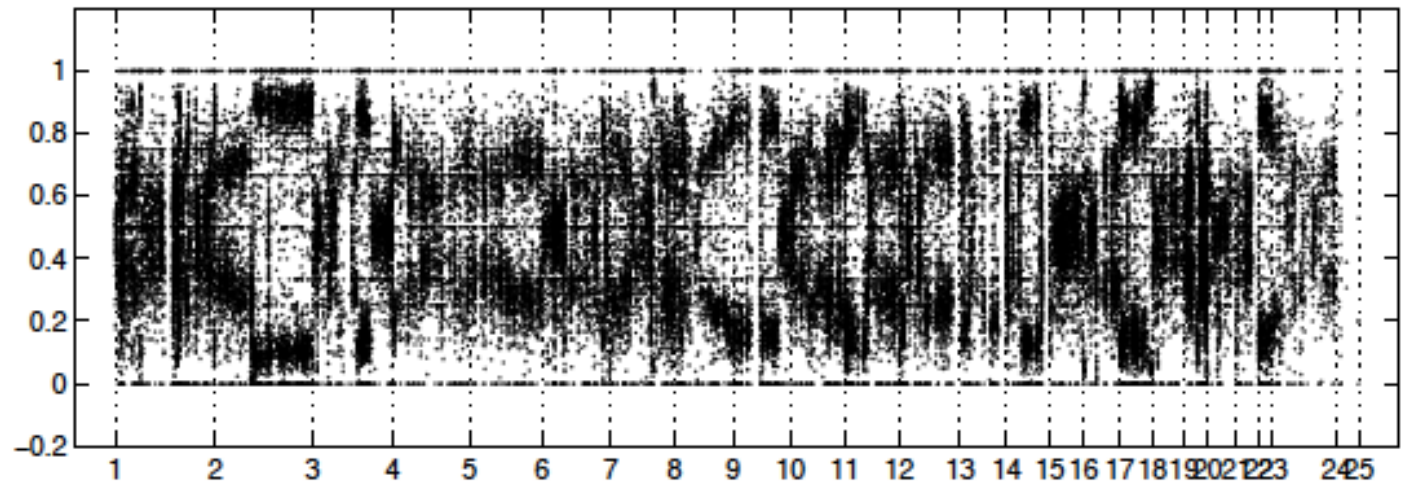

26\_ucsc.edu\_BRCA.IlluminaGA\_DNASeq.Level\_2.11.0.0\_TCGA-C8-A12L\_D  
germline-het

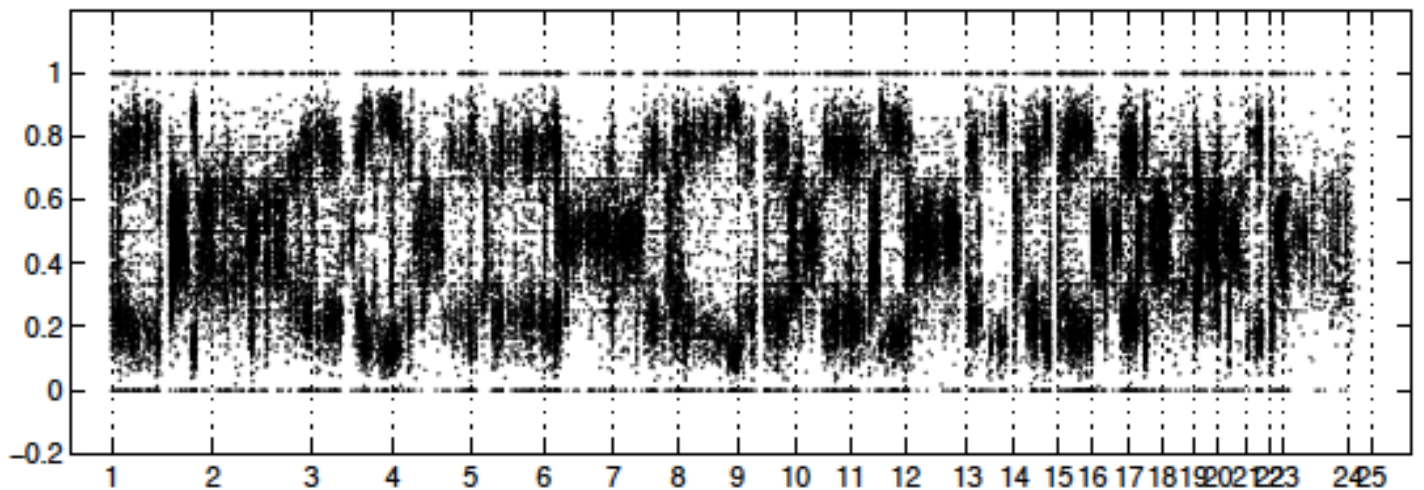

27\_ucsc.edu\_BRCA.IlluminaGA\_DNASeq.Level\_2.12.0.0\_TCGA-D8-A147\_D  
germline-het

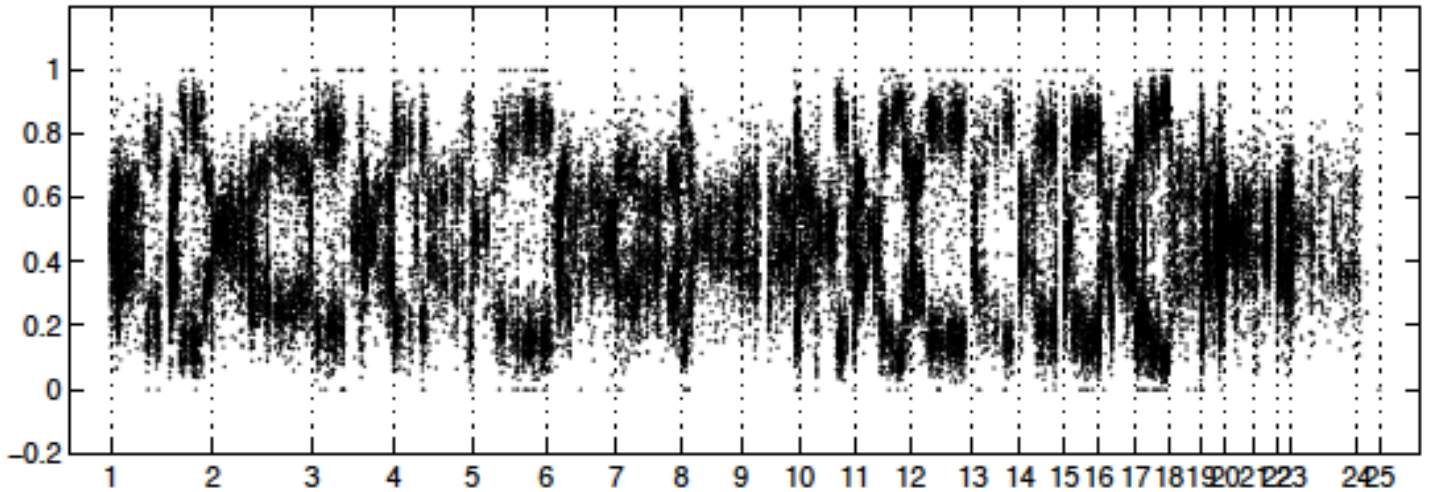

28\_ucsc.edu\_BRCA.IlluminaGA\_DNASeq.Level\_2.5.0.0\_TCGA-AN-A0FT\_W  
germline-het

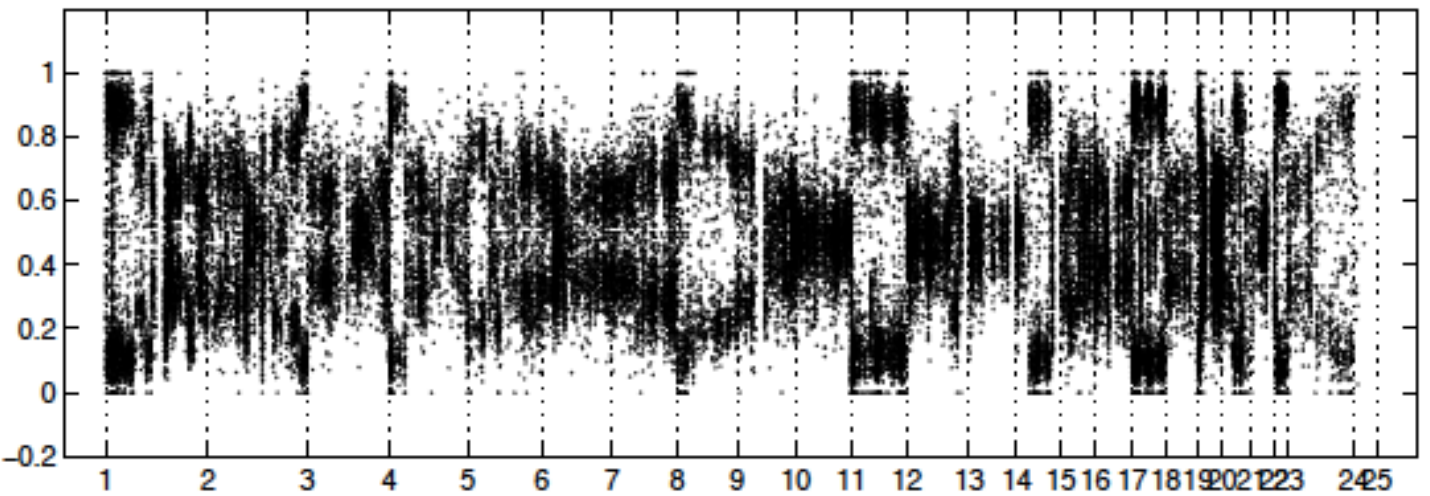

29\_ucsc.edu\_BRCA.IlluminaGA\_DNASeq.Level\_2.10.0.0\_TCGA-BH-A0E0\_W  
germline-het

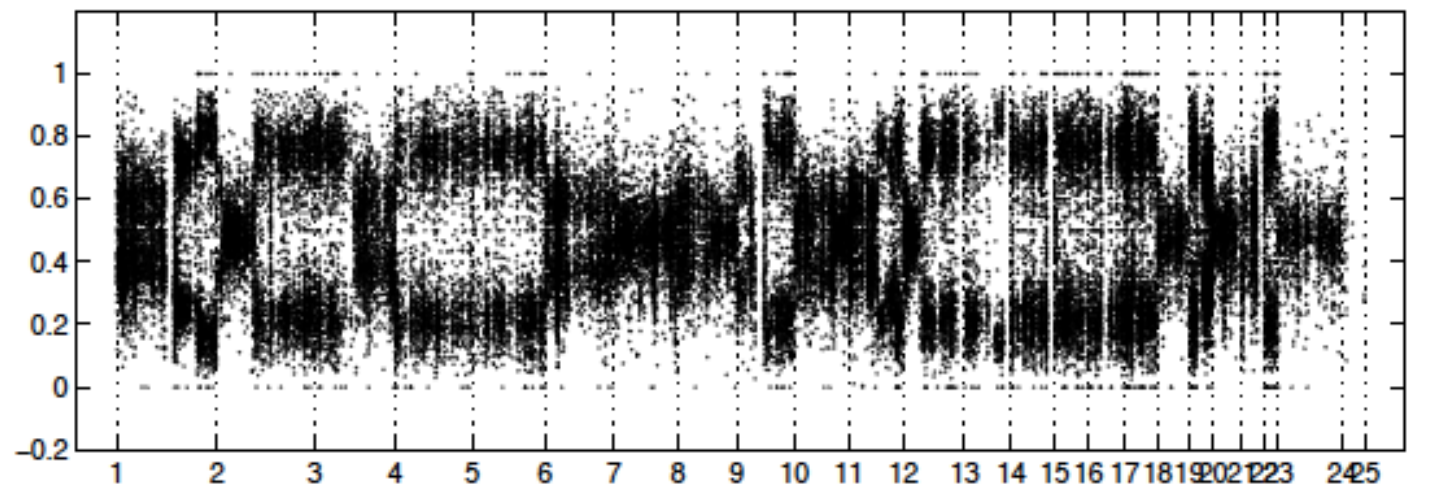

30\_ucsc.edu\_BRCA.IlluminaGA\_DNASeq.Level\_2.5.0.0\_TCGA-AN-A0G0\_W  
germline-het

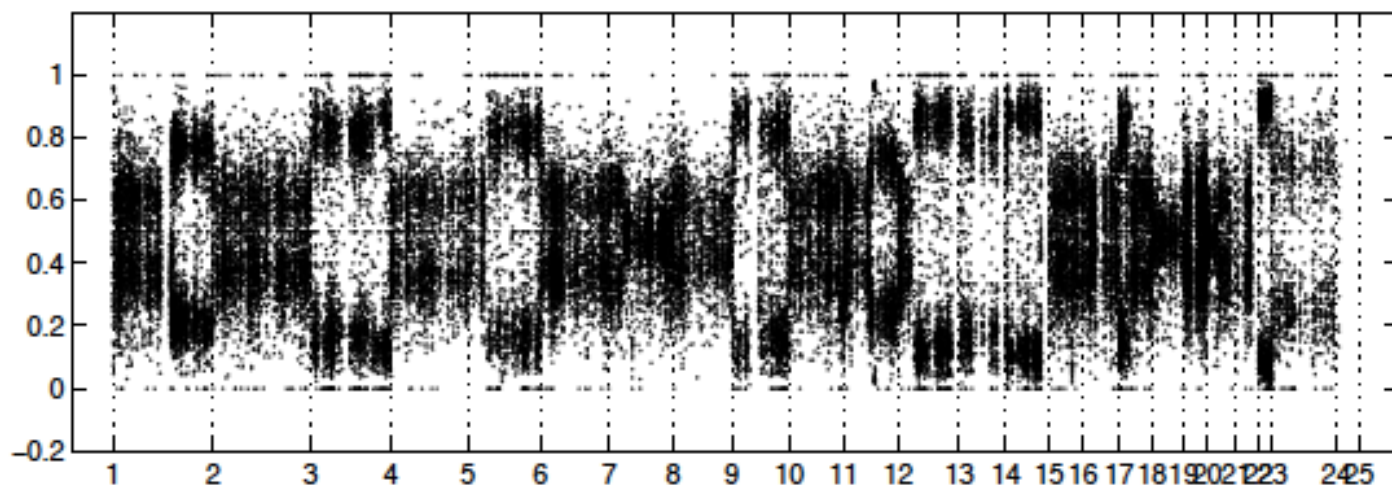

31\_ucsc.edu\_BRCA.IlluminaGA\_DNASeq.Level\_2.13.0.0\_TCGA-E2-A14O\_D  
germline-het

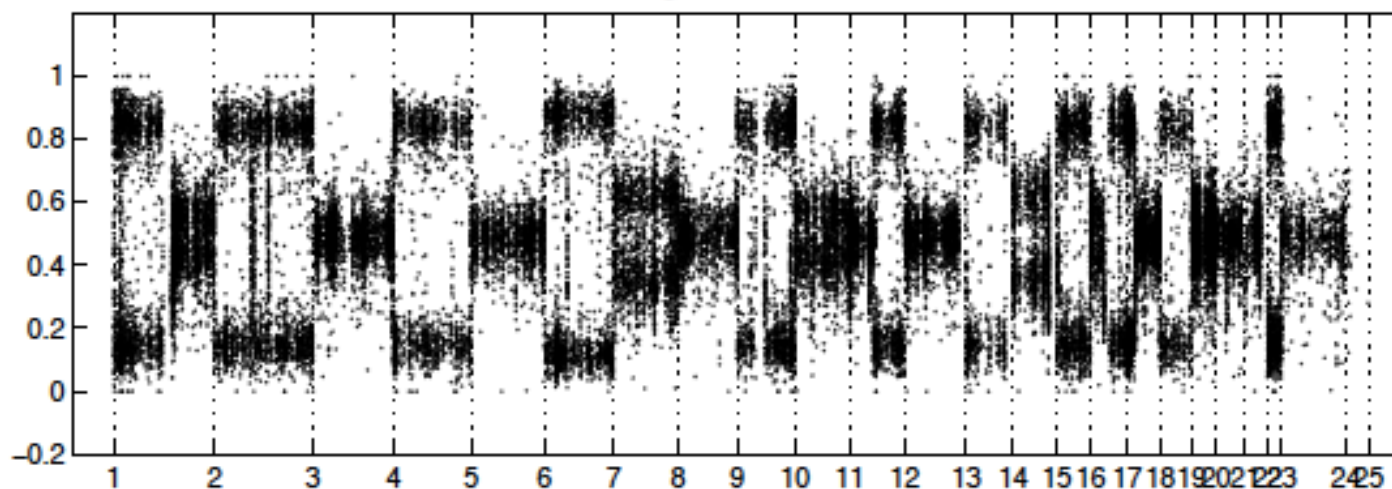

32\_ucsc.edu\_BRCA.IlluminaGA\_DNASeq.Level\_2.11.0.0\_TCGA-C8-A12W\_D  
germline-het

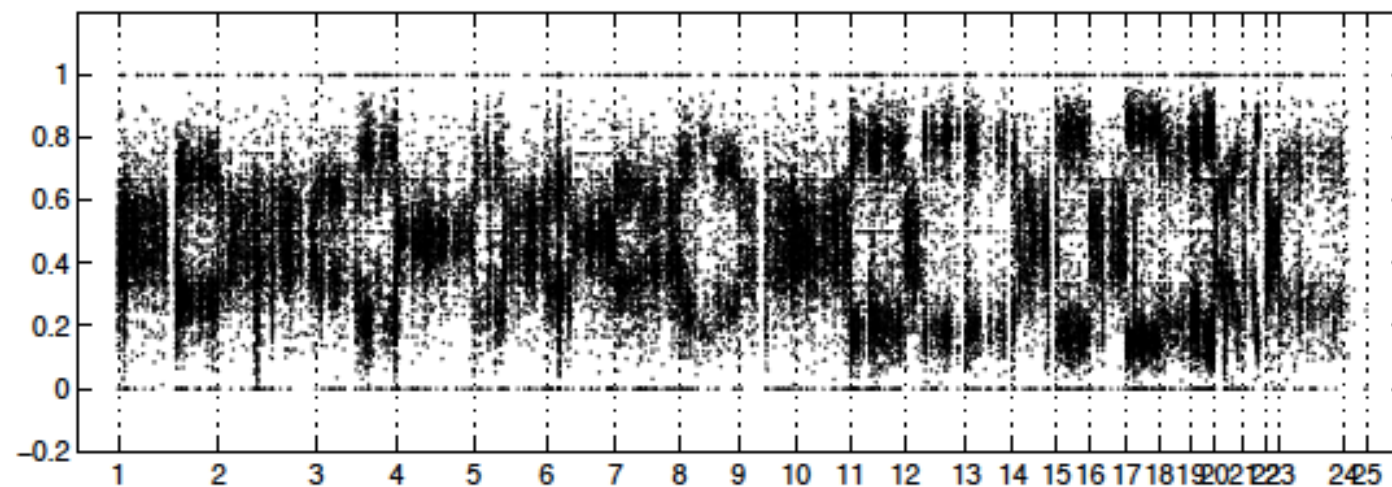

33\_ucsc.edu\_BRCA.IlluminaGA\_DNASeq.Level\_2.5.0.0\_TCGA-AN-A0FX\_W  
germline-het

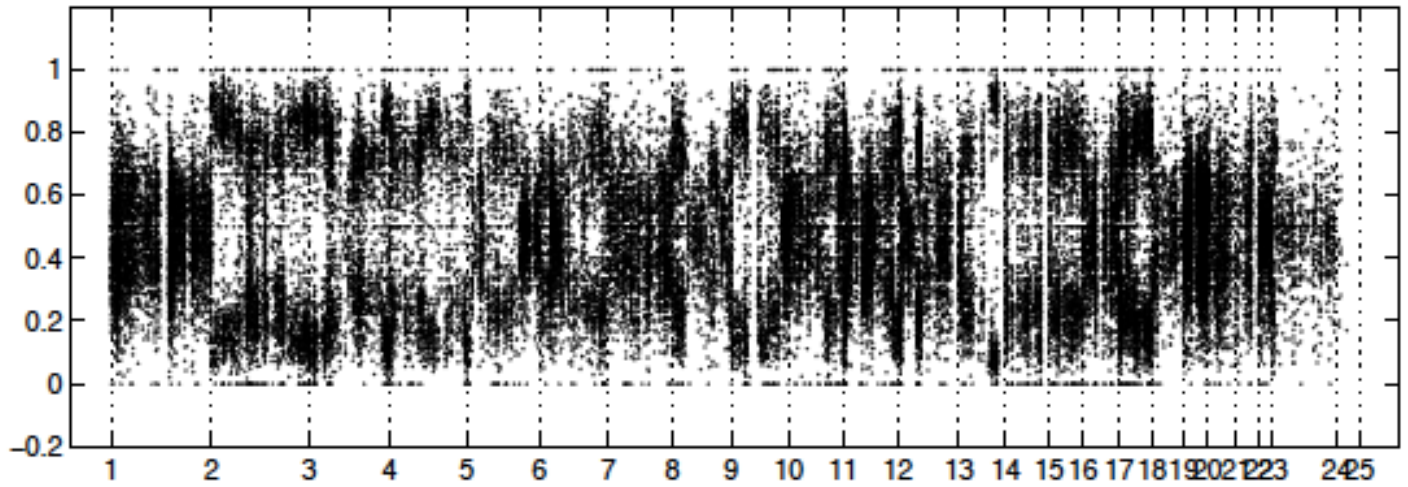

34\_ucsc.edu\_BRCA.IlluminaGA\_DNASeq.Level\_2.10.0.0\_TCGA-BH-A18Q\_D  
germline-het

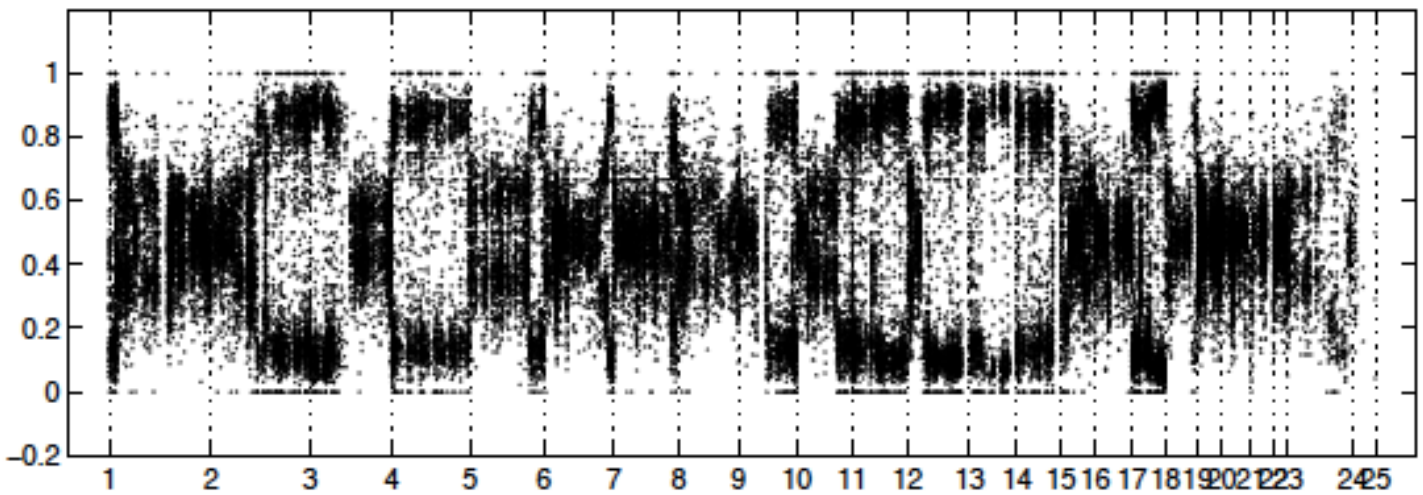

35\_ucsc.edu\_BRCA.IlluminaGA\_DNASeq.Level\_2.6.0.0\_TCGA-AO-A0J7\_W  
germline-het

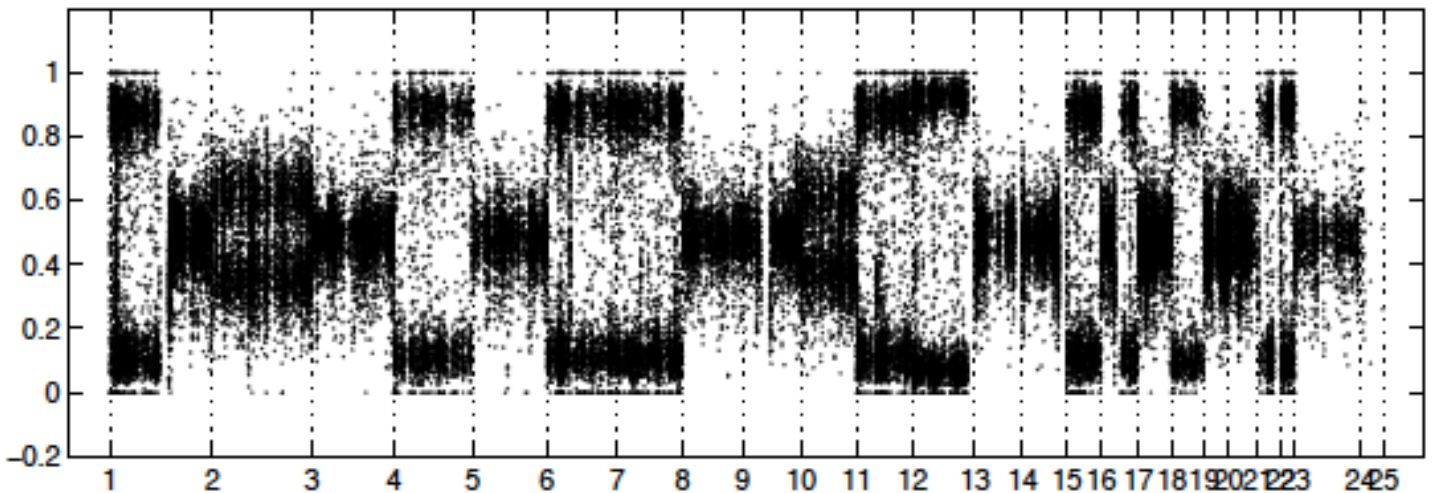

36\_ucsc.edu\_BRCA.IlluminaGA\_DNASeq.Level\_2.6.0.0\_TCGA-AO-A0J6\_W  
germline-het

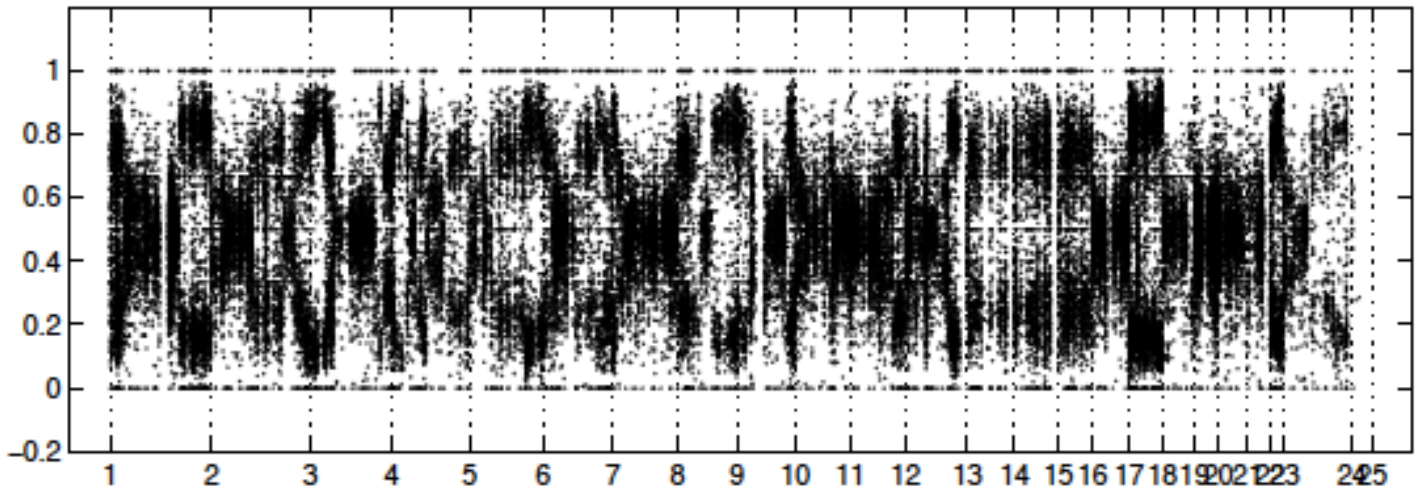

37\_ucsc.edu\_BRCA.IlluminaGA\_DNASeq.Level\_2.6.0.0\_TCGA-AO-A0J2\_W  
germline-het

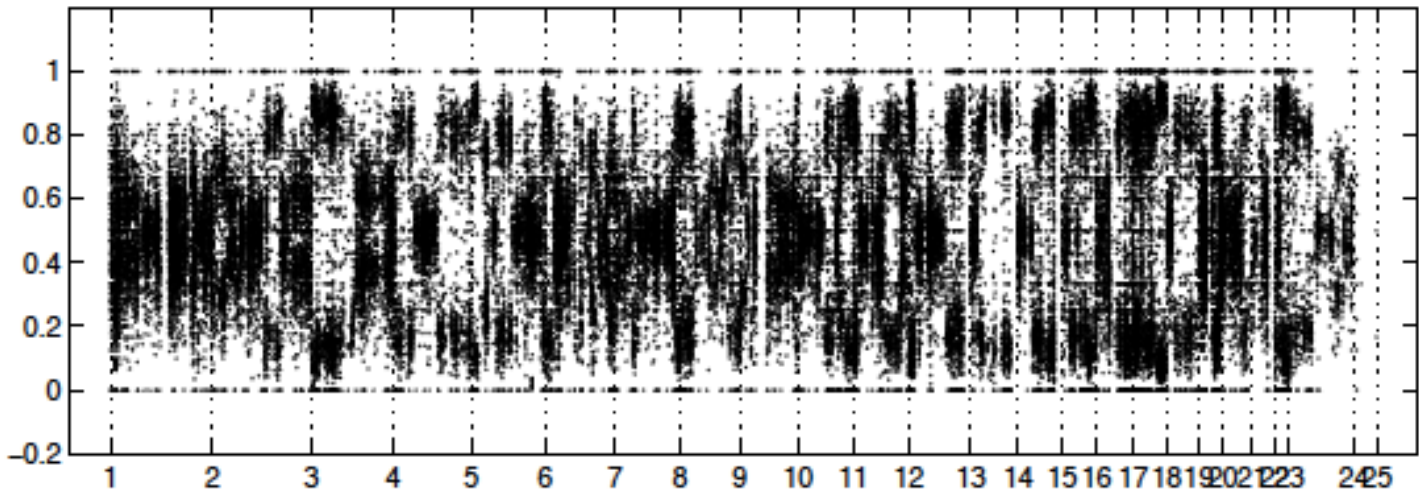

38\_ucsc.edu\_BRCA.IlluminaGA\_DNASeq.Level\_2.8.0.0\_TCGA-AR-A1AH\_D  
germline-het

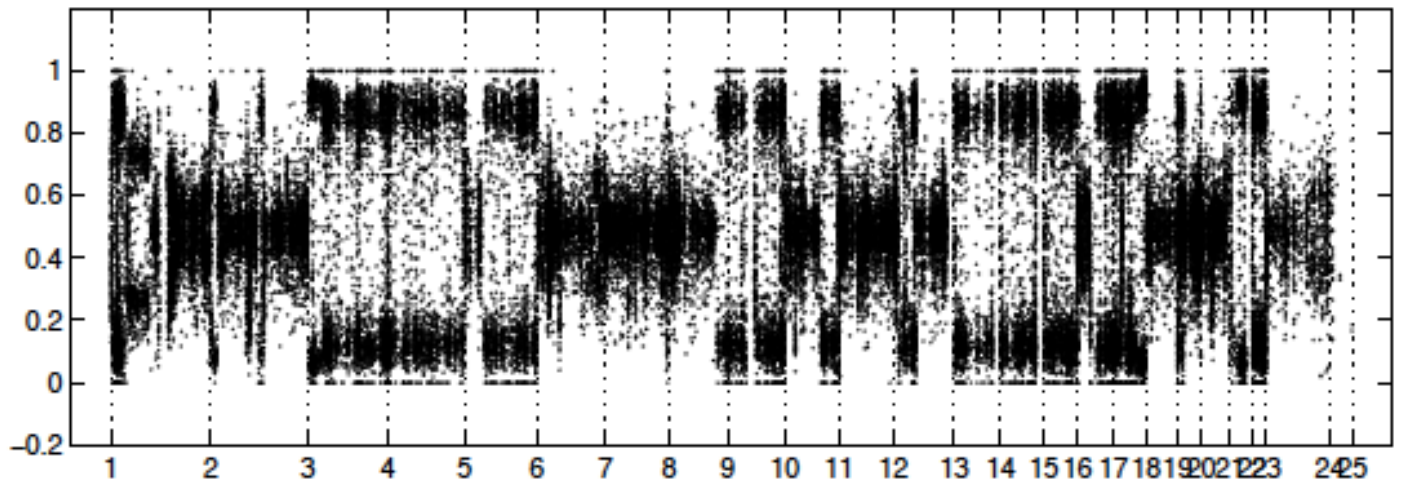

39\_ucsc.edu\_BRCA.IlluminaGA\_DNASeq.Level\_2.4.0.0\_TCGA-A8-A06U\_W  
germline-het

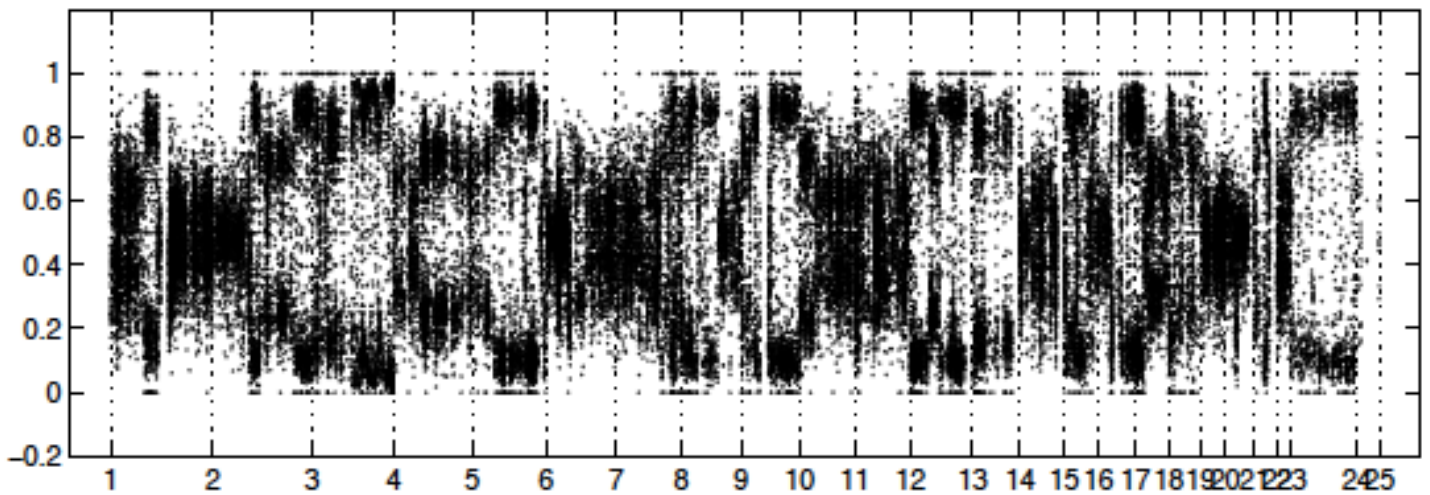

40\_ucsc.edu\_BRCA.IlluminaGA\_DNASeq.Level\_2.14.0.0\_TCGA-A2-A04P\_W  
germline-het

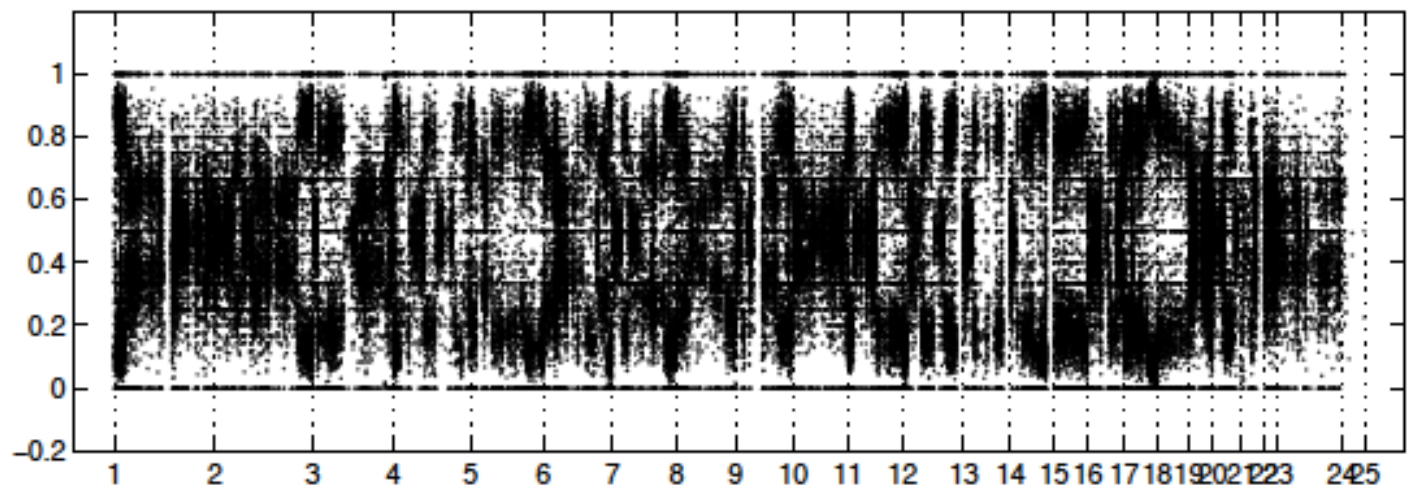

41\_ucsc.edu\_BRCA.IlluminaGA\_DNASeq.Level\_2.14.0.0\_TCGA-AN-A0FY\_W  
germline-het

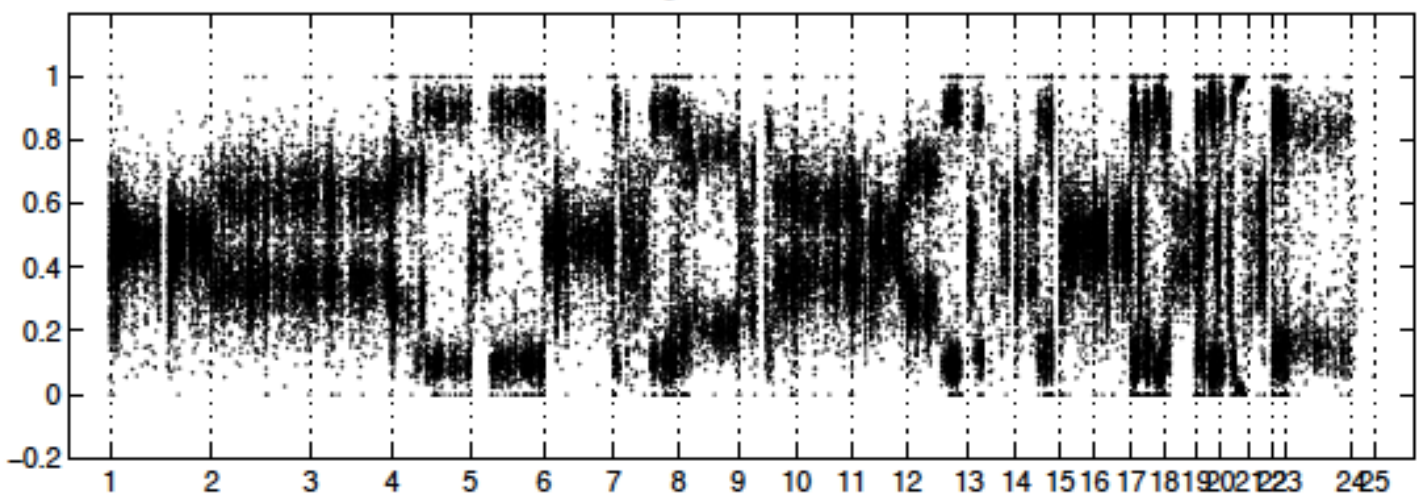

42\_ucsc.edu\_BRCA.IlluminaGA\_DNASeq.Level\_2.9.0.0\_TCGA-B6-A0RE\_W  
germline-het

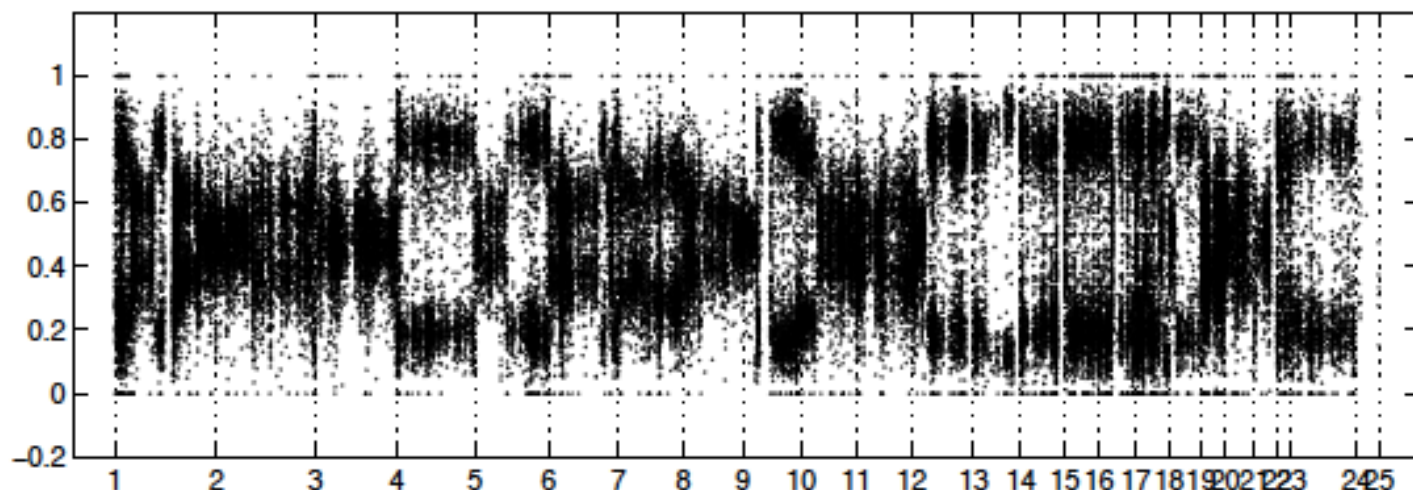

43\_ucsc.edu\_BRCA.IlluminaGA\_DNASeq.Level\_2.8.0.0\_TCGA-AR-A0U3\_D  
germline-het

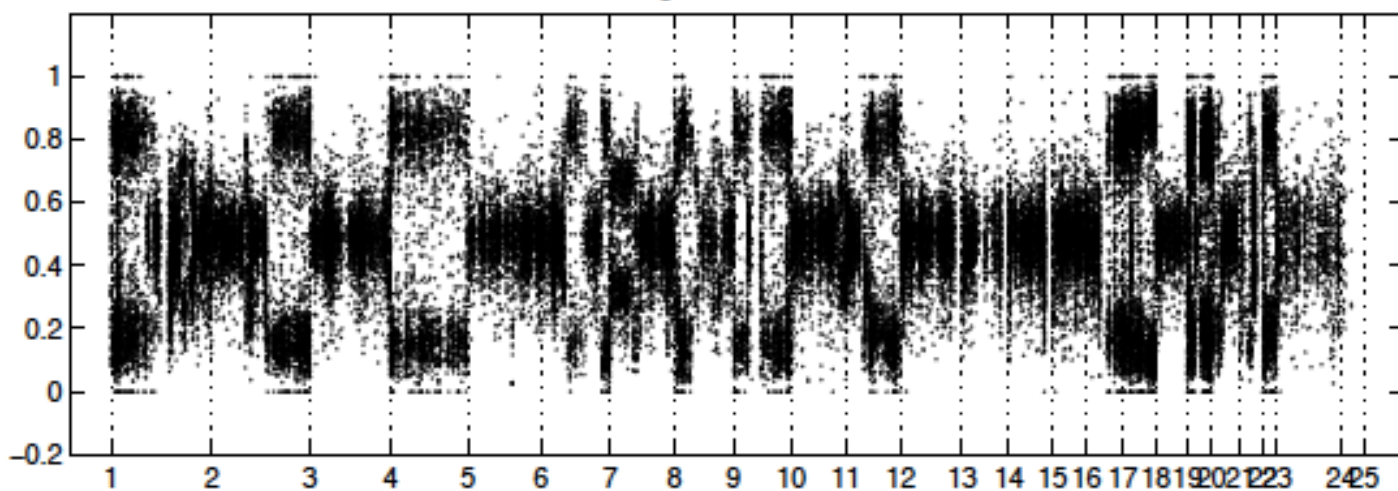

44\_ucsc.edu\_BRCA.IlluminaGA\_DNASeq.Level\_2.11.0.0\_TCGA-C8-A1HM\_D  
germline-het

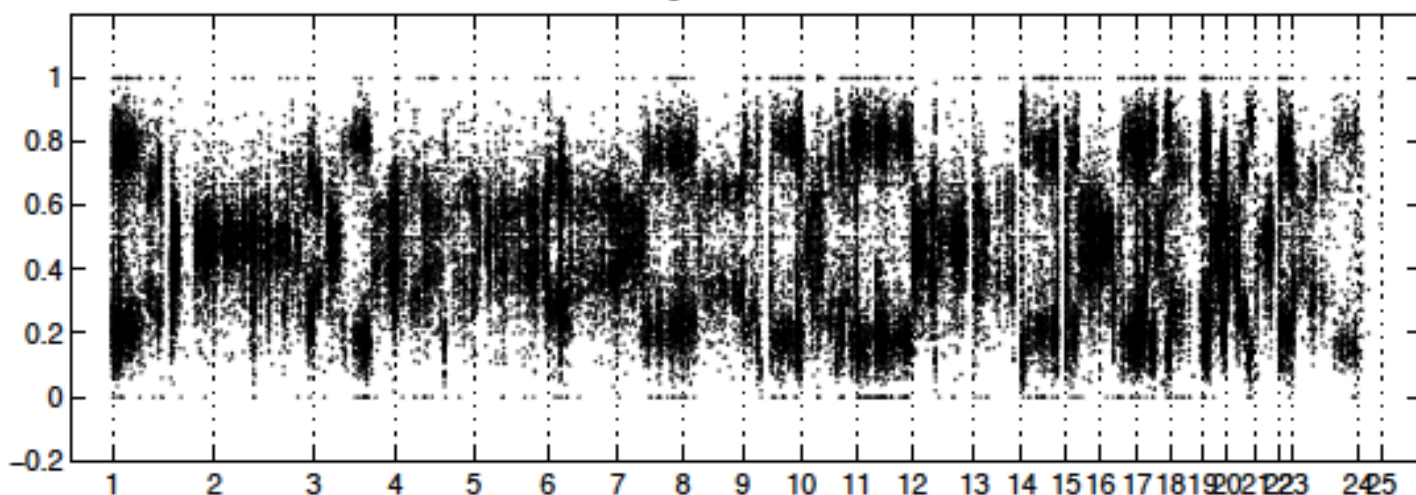



45\_ucsc.edu\_BRCA.IlluminaGA\_DNASeq.Level\_2.9.0.0\_TCGA-B6-A018\_W  
germline-het

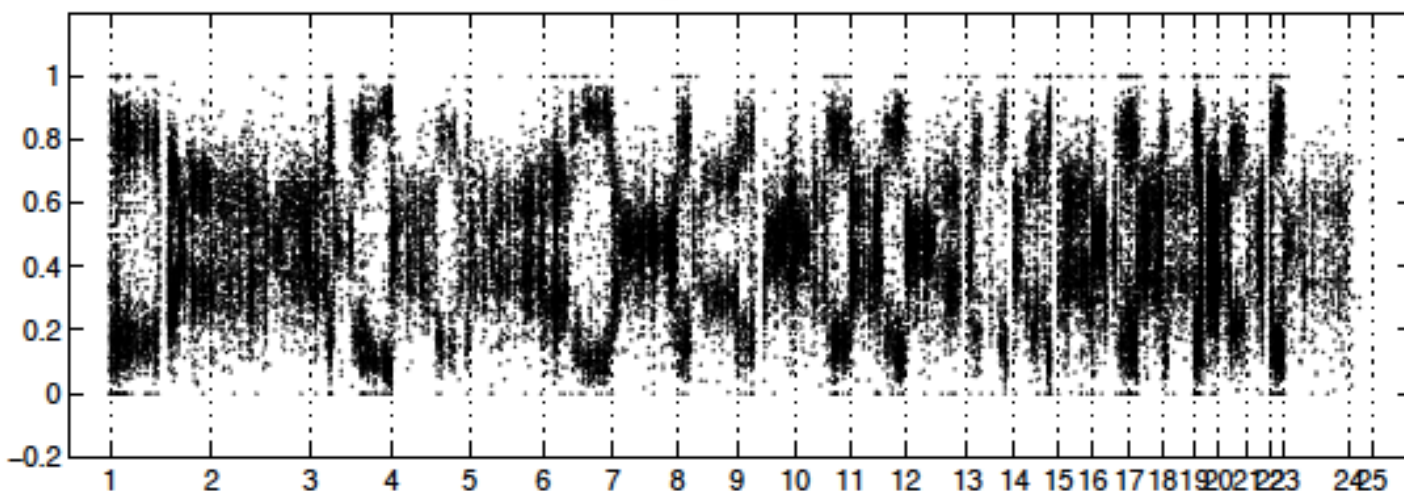

46\_ucsc.edu\_BRCA.IlluminaGA\_DNASeq.Level\_2.12.0.0\_TCGA-D8-A13Y\_D  
germline-het

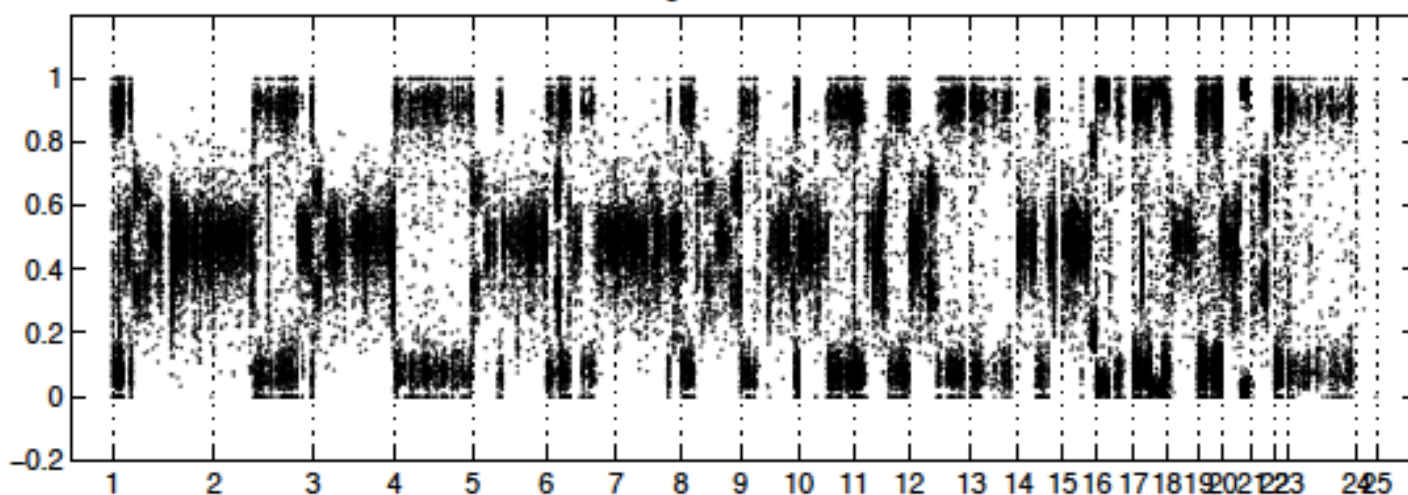

47\_ucsc.edu\_BRCA.IlluminaGA\_DNASeq.Level\_2.12.0.0\_TCGA-D8-A13Z\_D  
germline-het

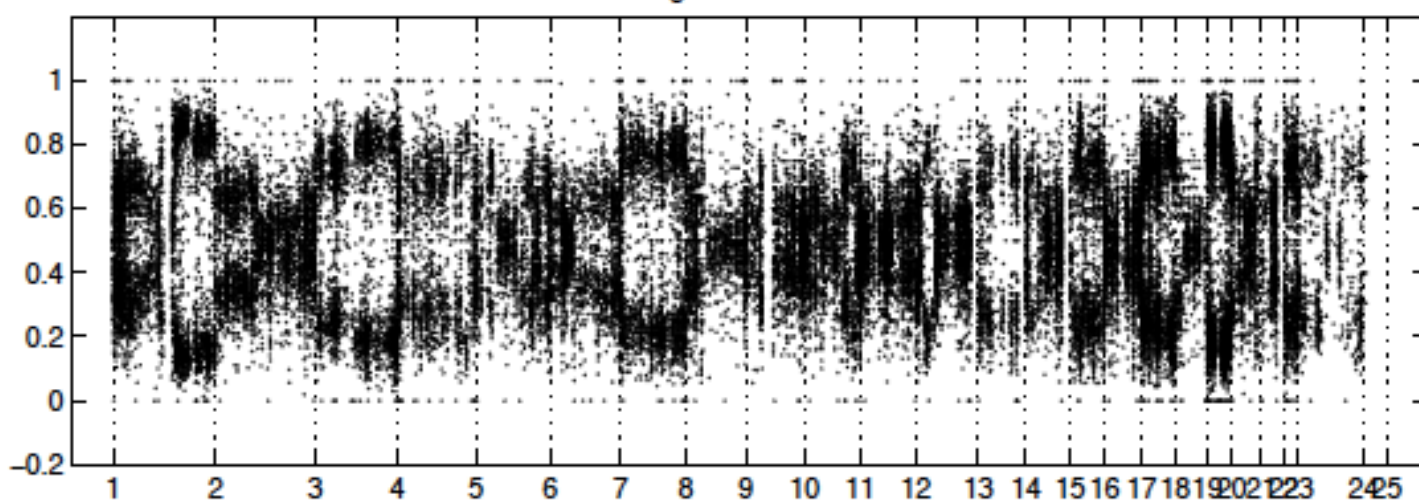

48\_ucsc.edu\_BRCA.IlluminaGA\_DNASeq.Level\_2.5.0.0\_TCGA-AN-A0FJ\_W  
germline-het

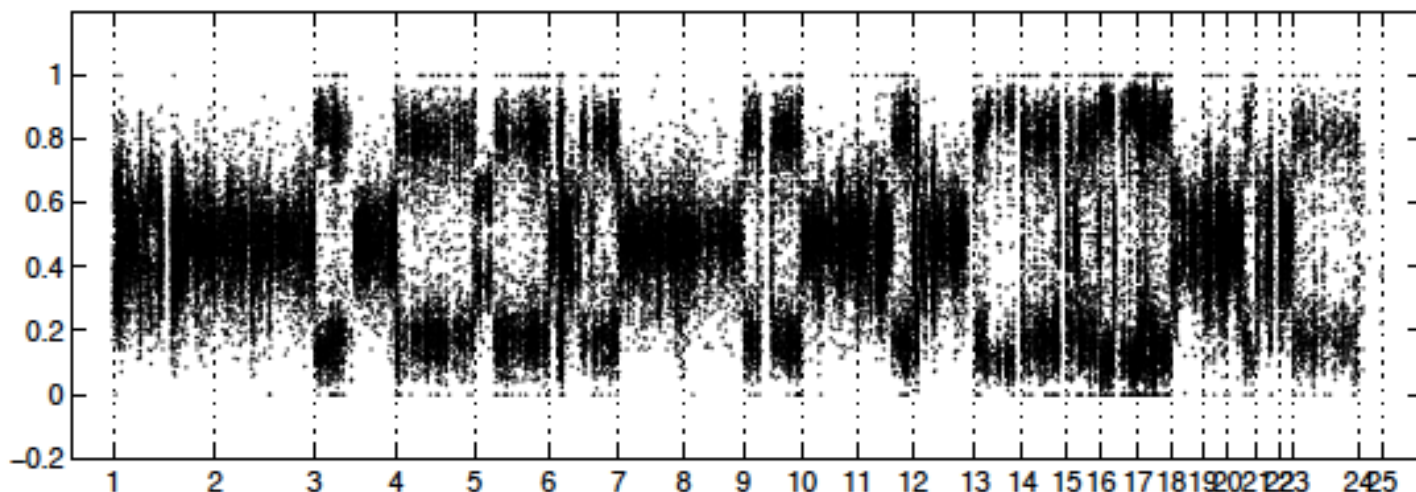

49\_ucsc.edu\_BRCA.IlluminaGA\_DNASeq.Level\_2.11.0.0\_TCGA-C8-A12U\_D  
germline-het

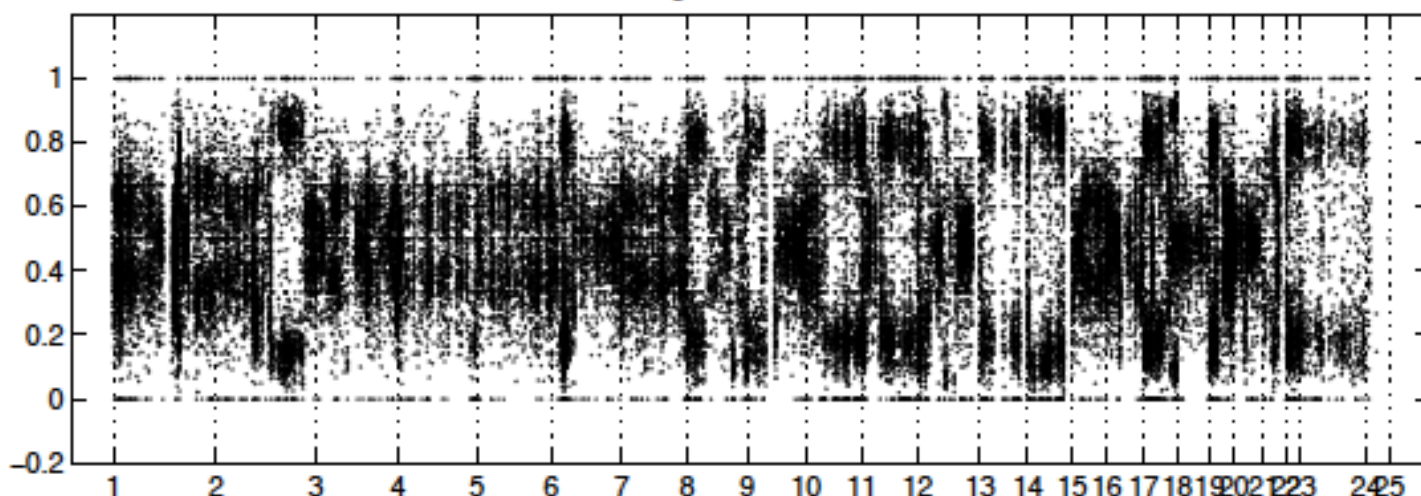

50\_ucsc.edu\_BRCA.IlluminaGA\_DNASeq.Level\_2.7.0.0\_TCGA-AQ-A04L\_D  
germline-het

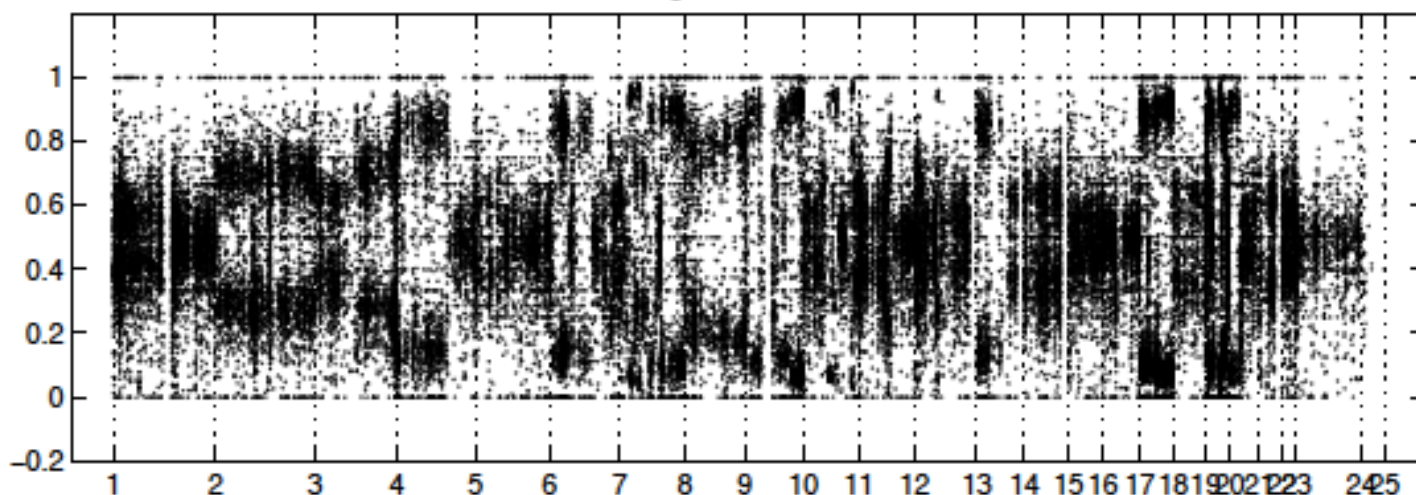

51\_ucsc.edu\_BRCA.IlluminaGA\_DNASeq.Level\_2.10.0.0\_TCGA-BH-A0HY\_W  
germline-het

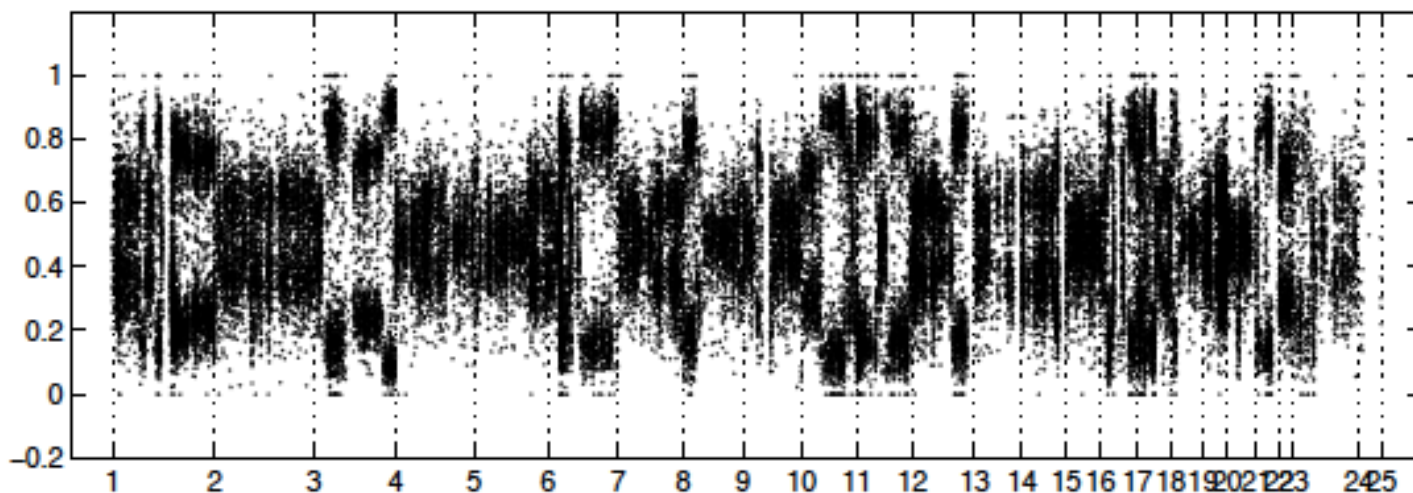

52\_ucsc.edu\_BRCA.IlluminaGA\_DNASeq.Level\_2.13.0.0\_TCGA-E2-A14P\_D  
germline-het

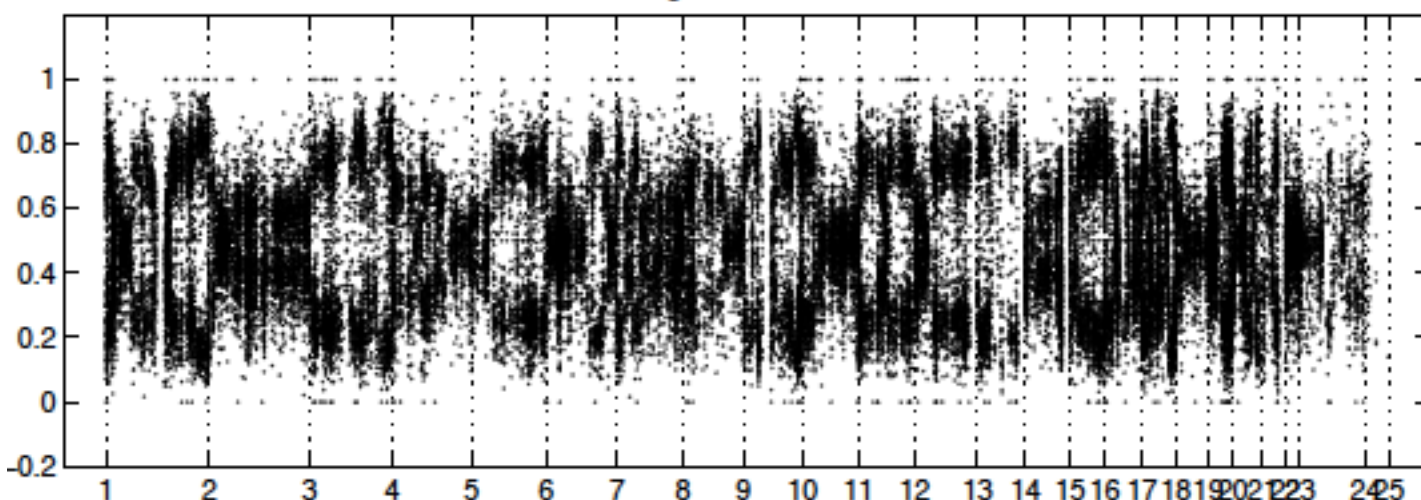

53\_ucsc.edu\_BRCA.IlluminaGA\_DNASeq.Level\_2.9.0.0\_TCGA-B6-A0I9\_W  
germline-het

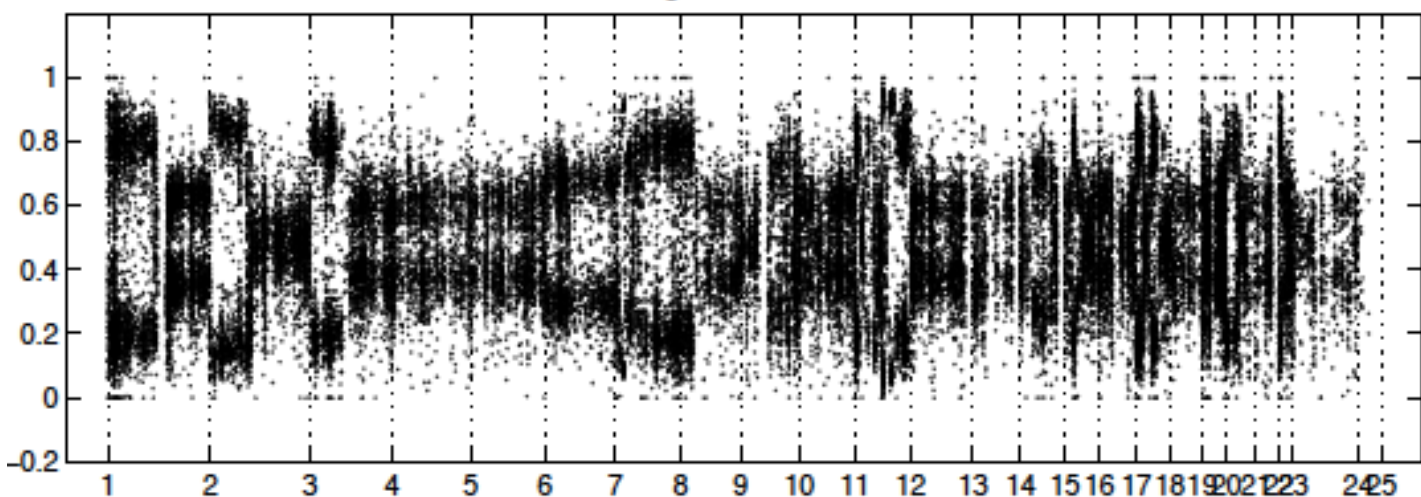

54\_ucsc.edu\_BRCA.IlluminaGA\_DNASeq.Level\_2.3.0.0\_TCGA-A7-A0CJ\_W  
germline-het

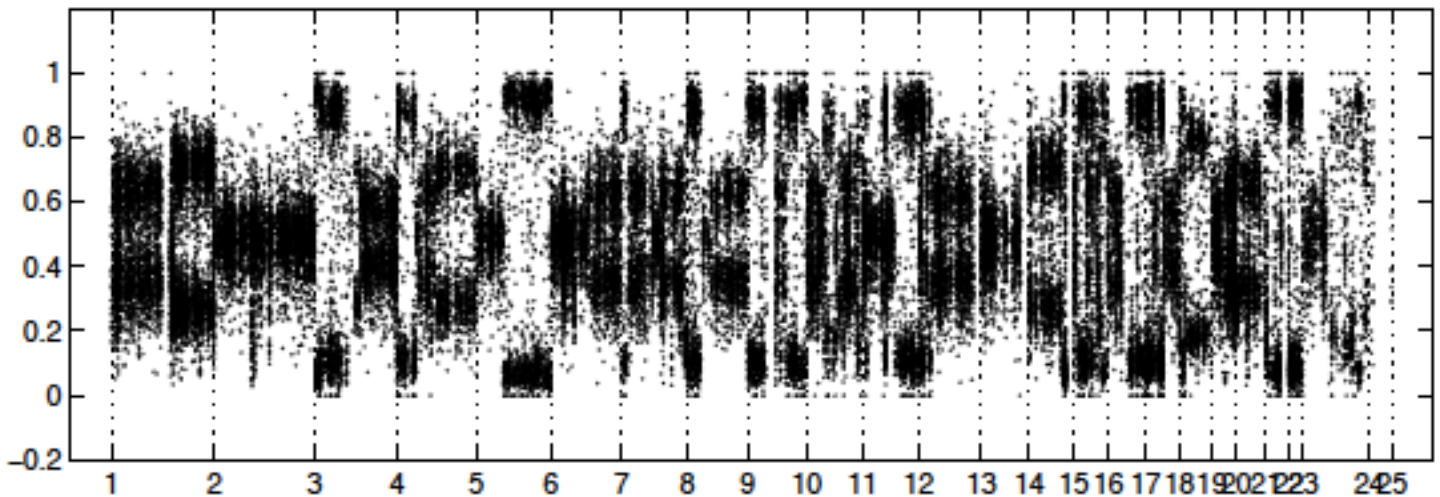

55\_ucsc.edu\_BRCA.IlluminaGA\_DNASeq.Level\_2.2.0.0\_TCGA-A2-A0CT\_W  
germline-het

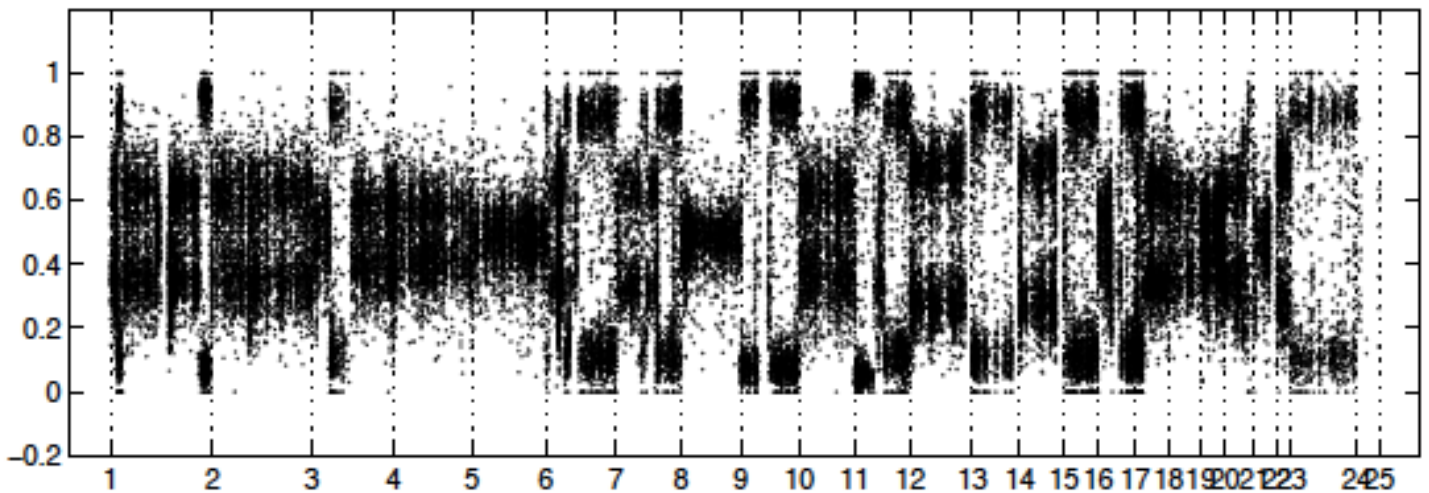

56\_ucsc.edu\_BRCA.IlluminaGA\_DNASeq.Level\_2.8.0.0\_TCGA-AR-A0U2\_D  
germline-het

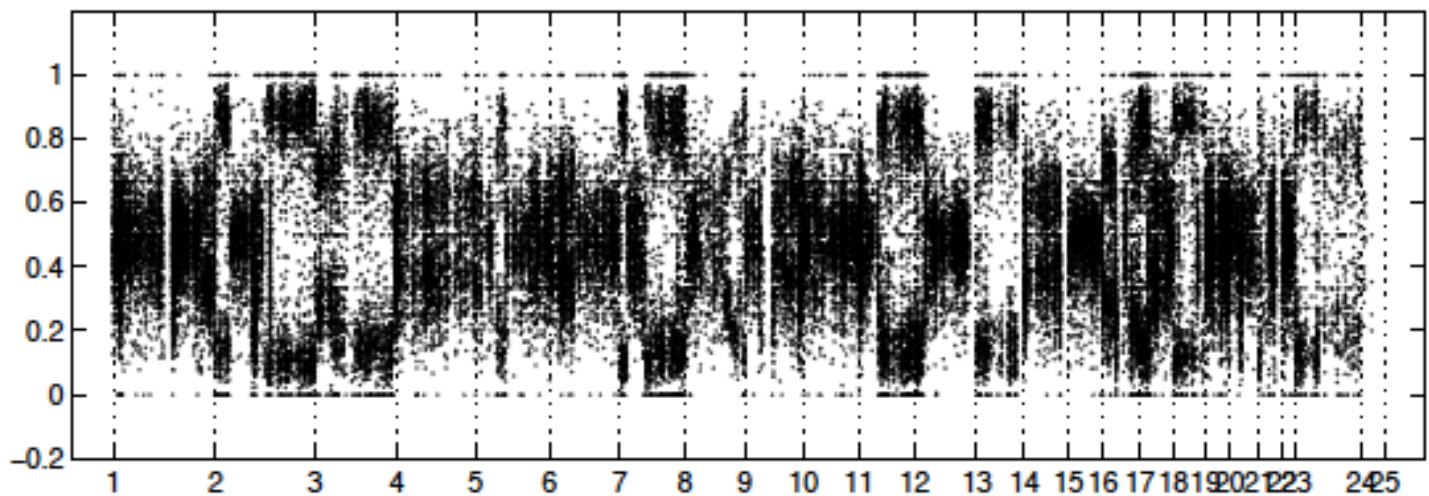

57\_ucsc.edu\_BRCA.IlluminaGA\_DNASeq.Level\_2.3.0.0\_TCGA-A7-A0CE\_W  
germline-het

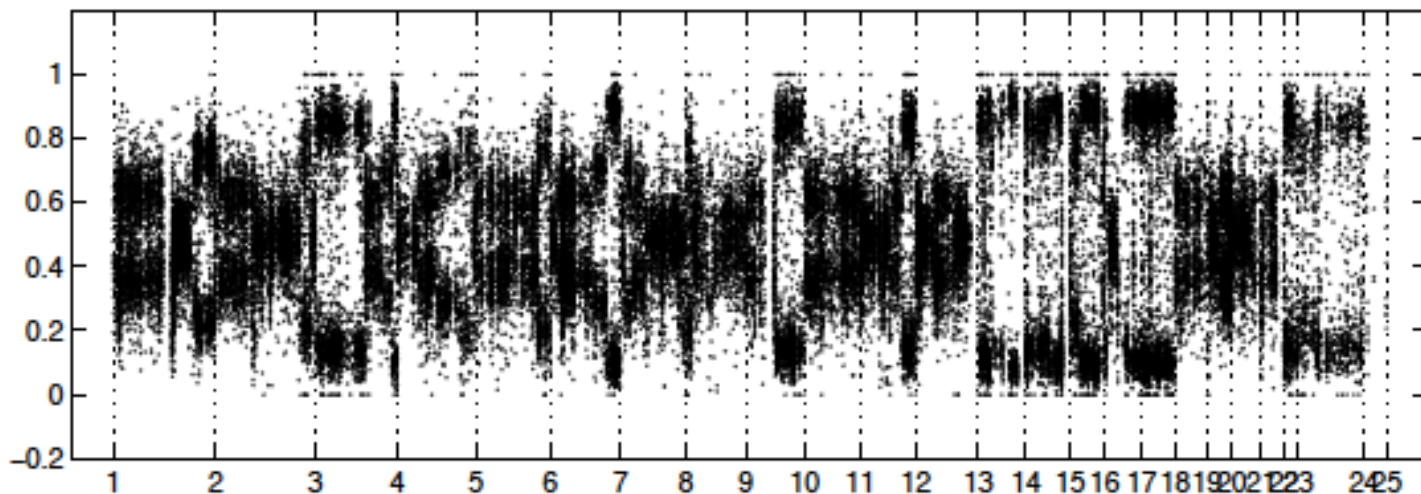

58\_ucsc.edu\_BRCA.IlluminaGA\_DNASeq.Level\_2.5.0.0\_TCGA-AN-A0AR\_W  
germline-het

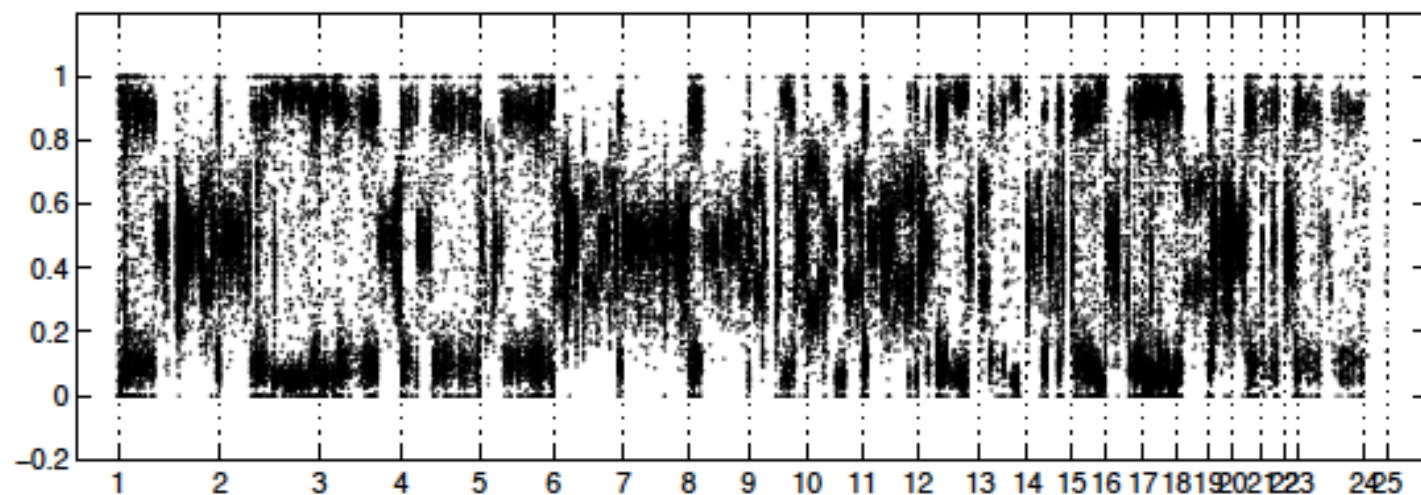

59\_ucsc.edu\_BRCA.IlluminaGA\_DNASeq.Level\_2.10.0.0\_TCGA-BH-A0BG\_D  
germline-het

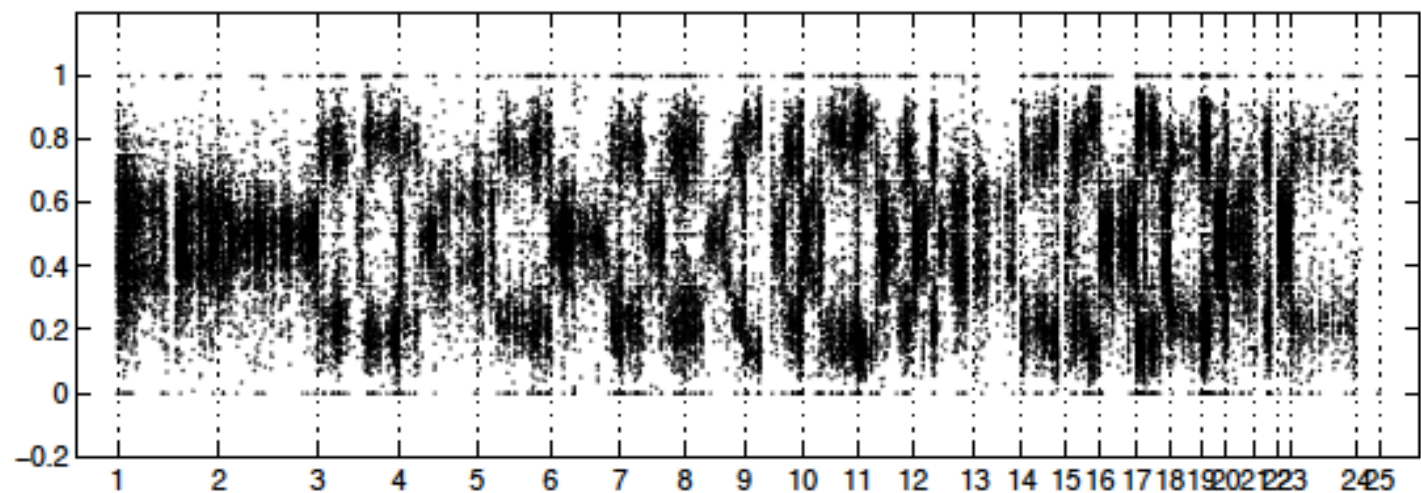

60\_ucsc.edu\_BRCA.IlluminaGA\_DNASeq.Level\_2.6.0.0\_TCGA-A0-A0JL\_W  
germline-het

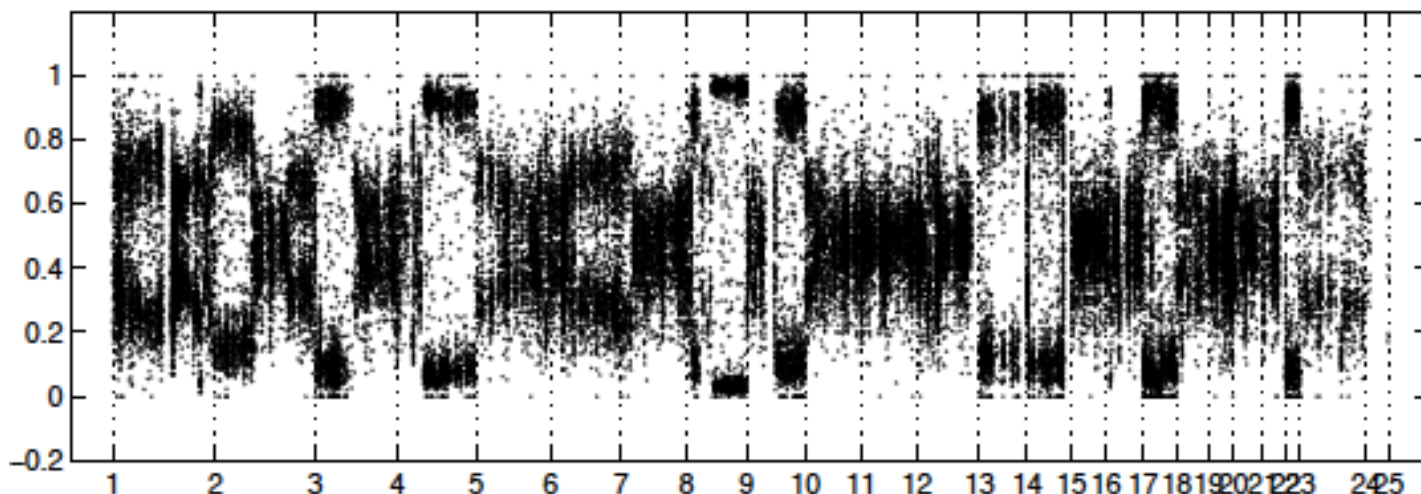

61\_ucsc.edu\_BRCA.IlluminaGA\_DNASeq.Level\_2.4.0.0\_TCGA-A8-A092\_W  
germline-het

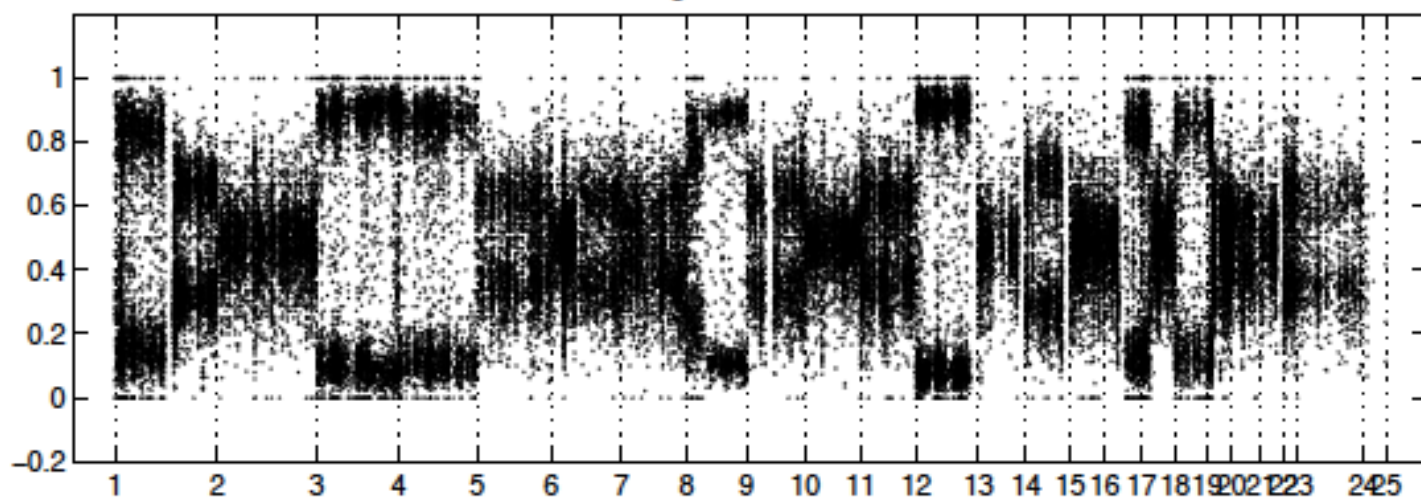

62\_ucsc.edu\_BRCA.IlluminaGA\_DNASeq.Level\_2.3.0.0\_TCGA-A7-A0DA\_D  
germline-het

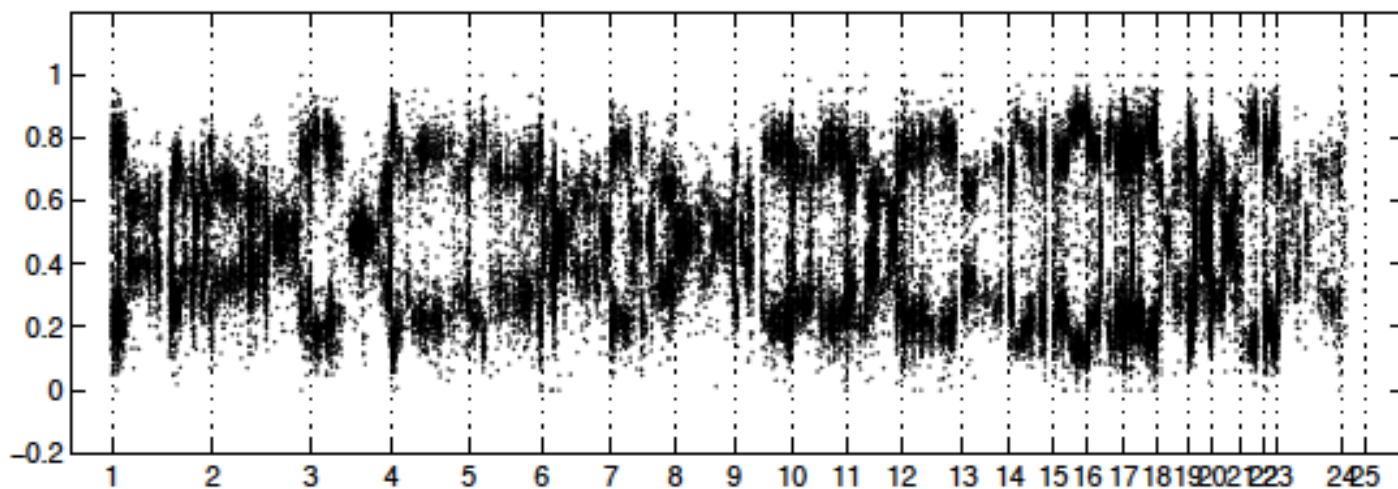

63\_ucsc.edu\_BRCA.IlluminaGA\_DNASeq.Level\_2.5.0.0\_TCGA-AN-A04A\_W  
germline-het

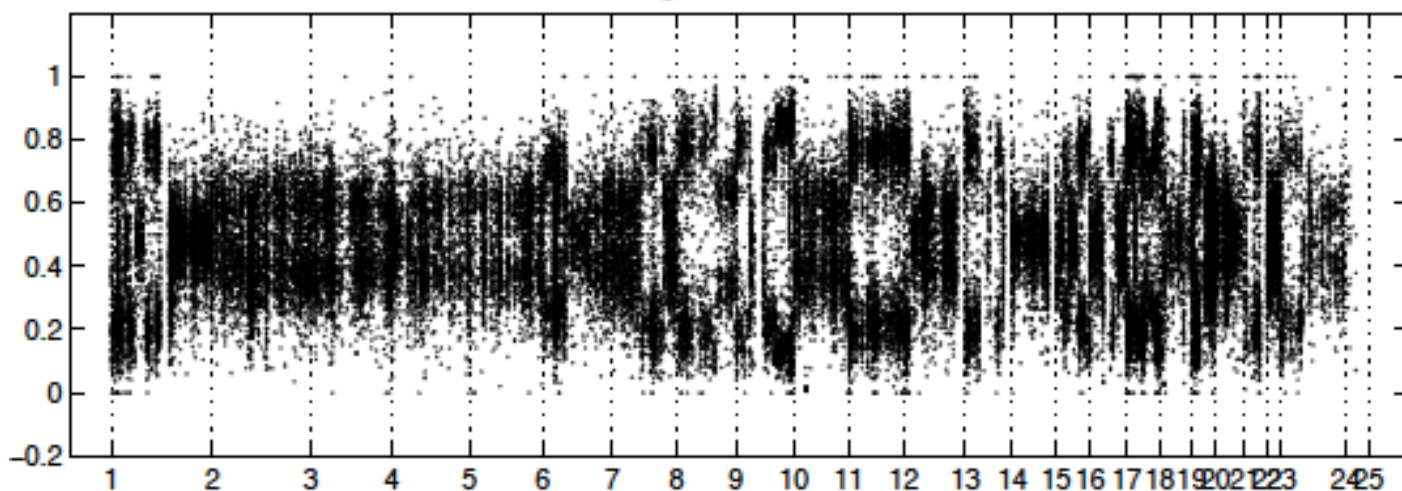

64\_ucsc.edu\_BRCA.IlluminaGA\_DNASeq.Level\_2.13.0.0\_TCGA-E2-A150\_D  
germline-het

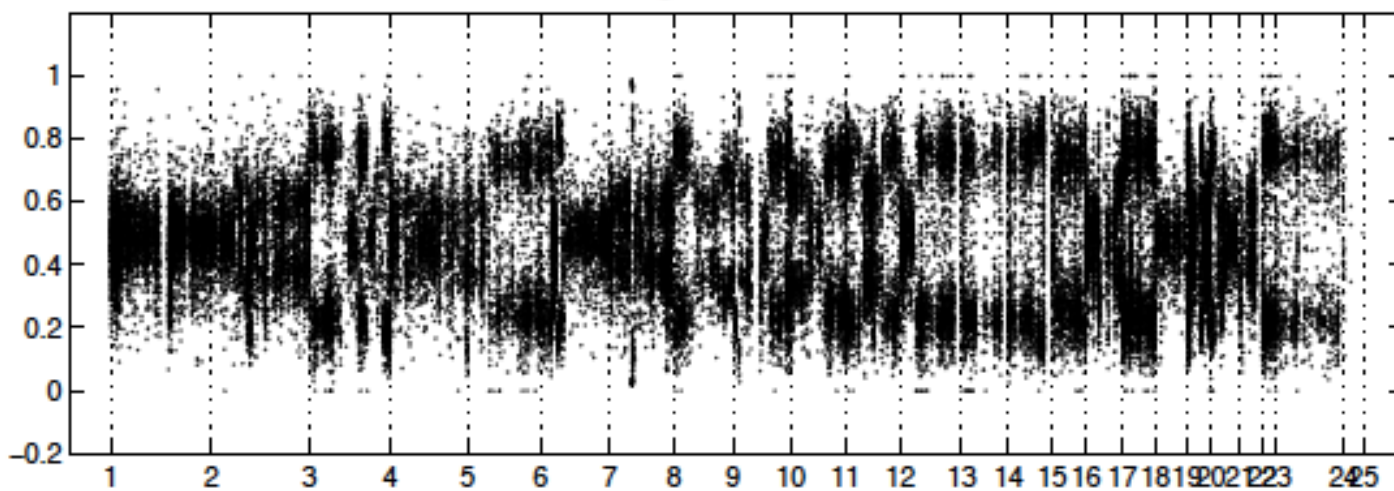

65\_ucsc.edu\_BRCA.IlluminaGA\_DNASeq.Level\_2.11.0.0\_TCGA-C8-A134\_D  
germline-het

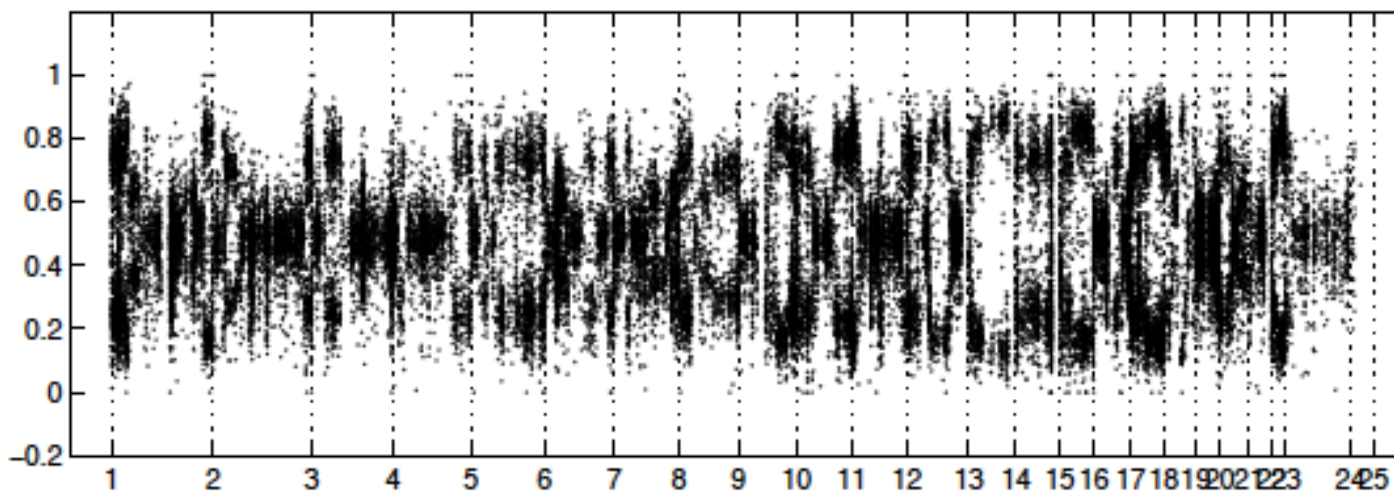

66\_ucsc.edu\_BRCA.IlluminaGA\_DNASeq.Level\_2.4.0.0\_TCGA-A8-A08R\_W  
germline-het

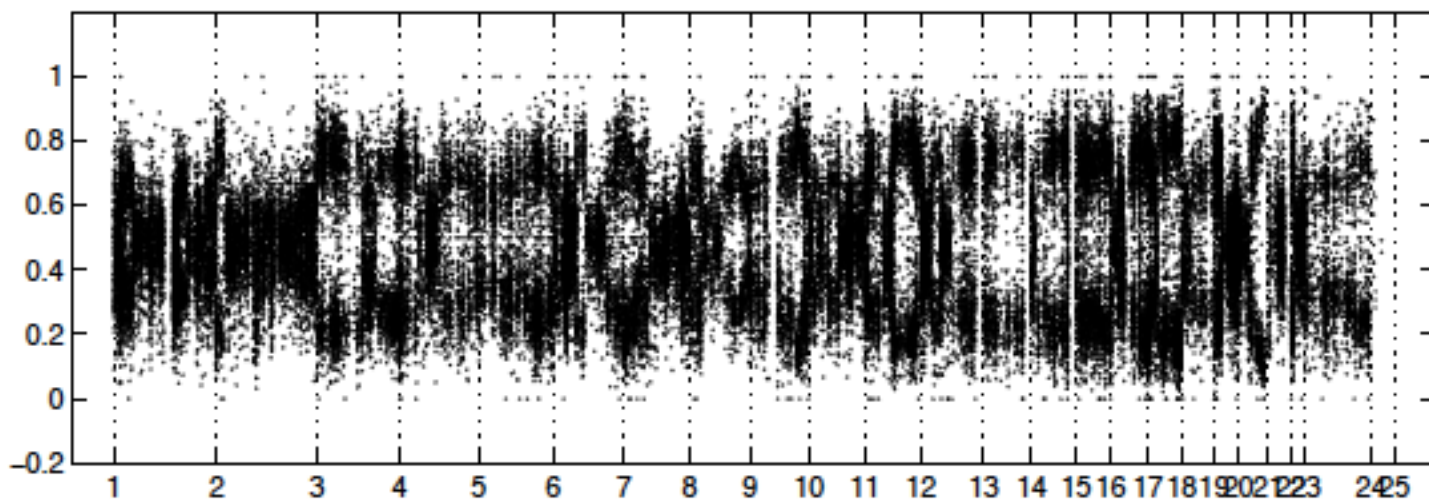

67\_ucsc.edu\_BRCA.IlluminaGA\_DNASeq.Level\_2.14.0.0\_TCGA-A2-A0SV\_W  
germline-het

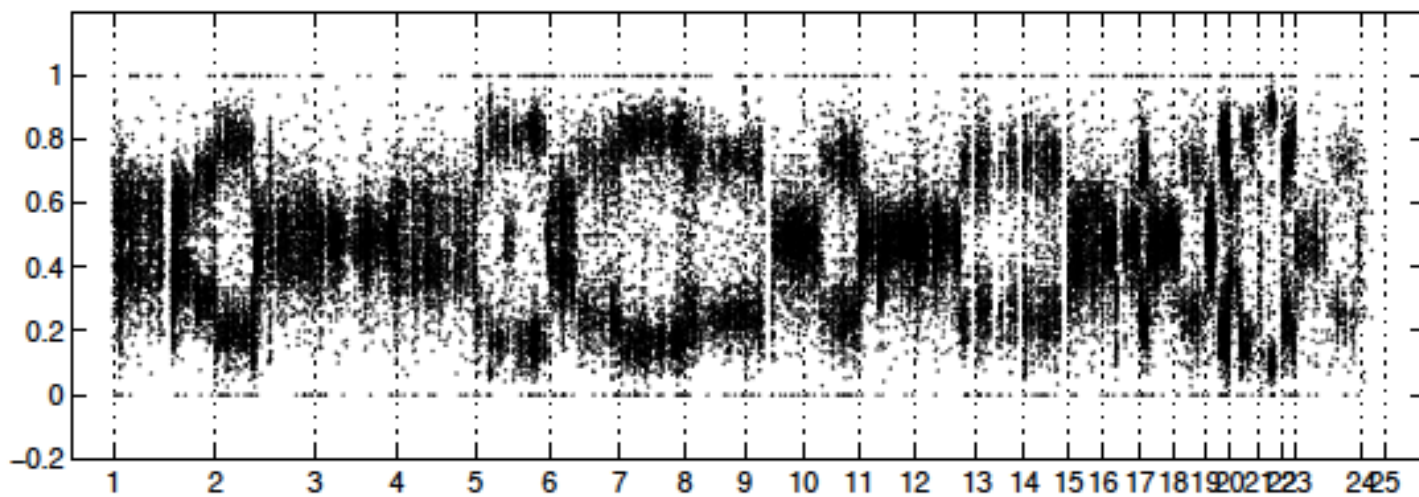

68\_ucsc.edu\_BRCA.IlluminaGA\_DNASeq.Level\_2.10.0.0\_TCGA-BH-A18U\_D  
germline-het

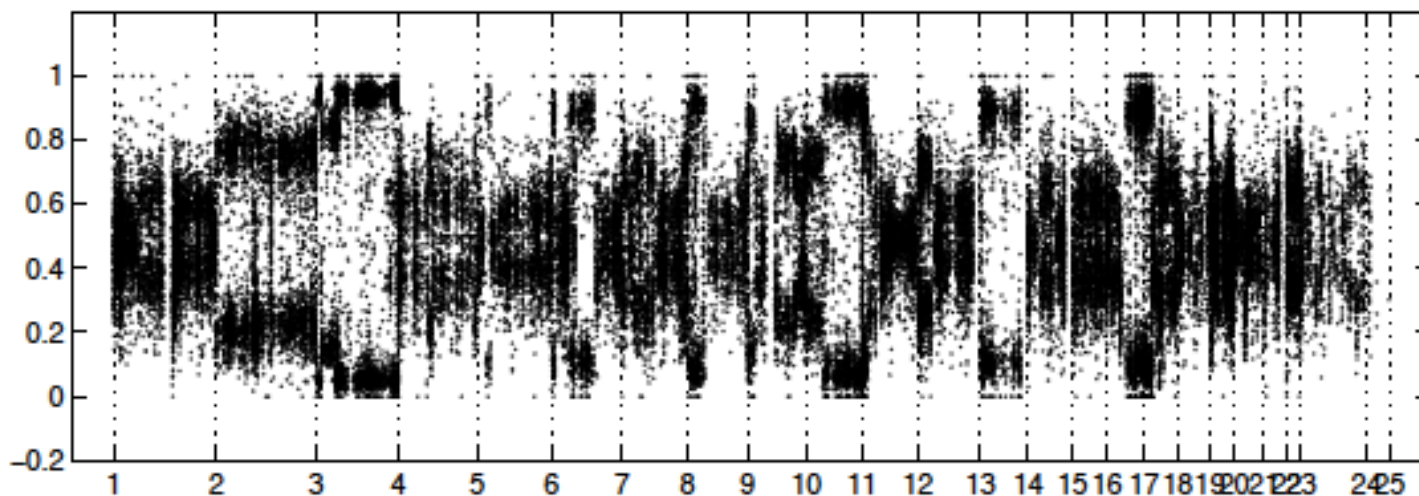



69\_ucsc.edu\_BRCA.IlluminaGA\_DNASeq.Level\_2.4.0.0\_TCGA-A8-A08L\_W  
germline-het

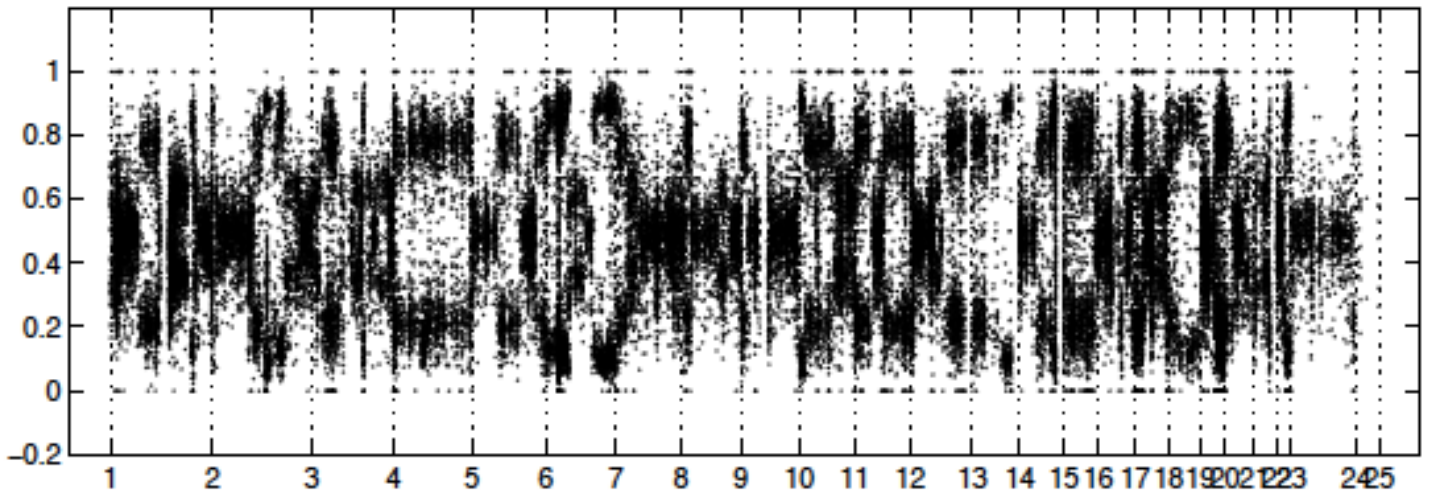

70\_ucsc.edu\_BRCA.IlluminaGA\_DNASeq.Level\_2.4.0.0\_TCGA-A8-A07L\_W  
germline-het

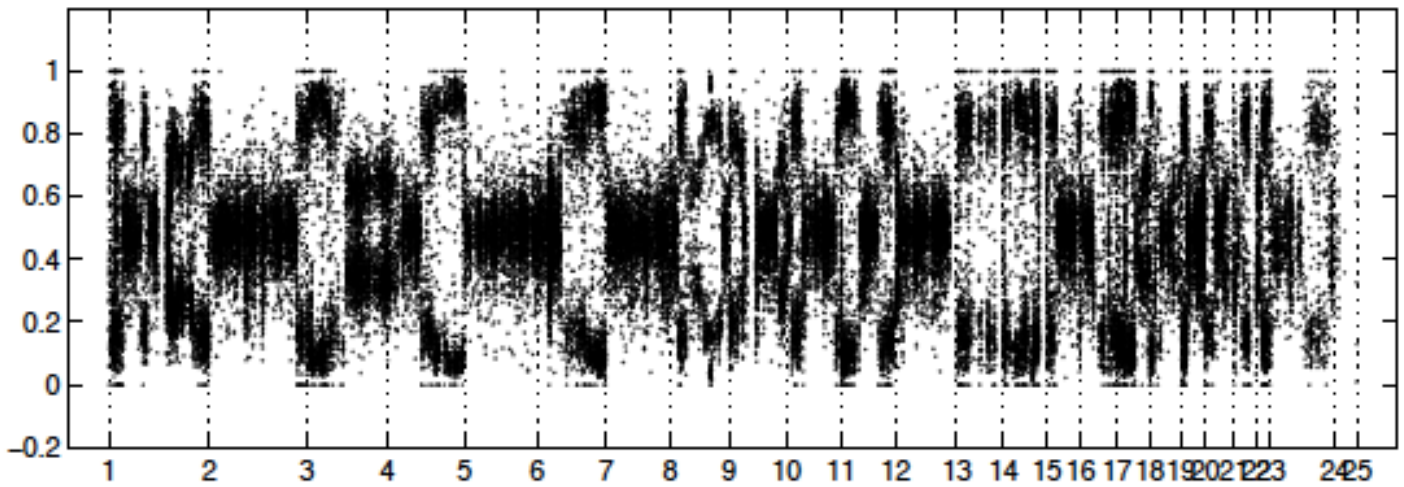

71\_ucsc.edu\_BRCA.IlluminaGA\_DNASeq.Level\_2.10.0.0\_TCGA-BH-A0BP\_D  
germline-het

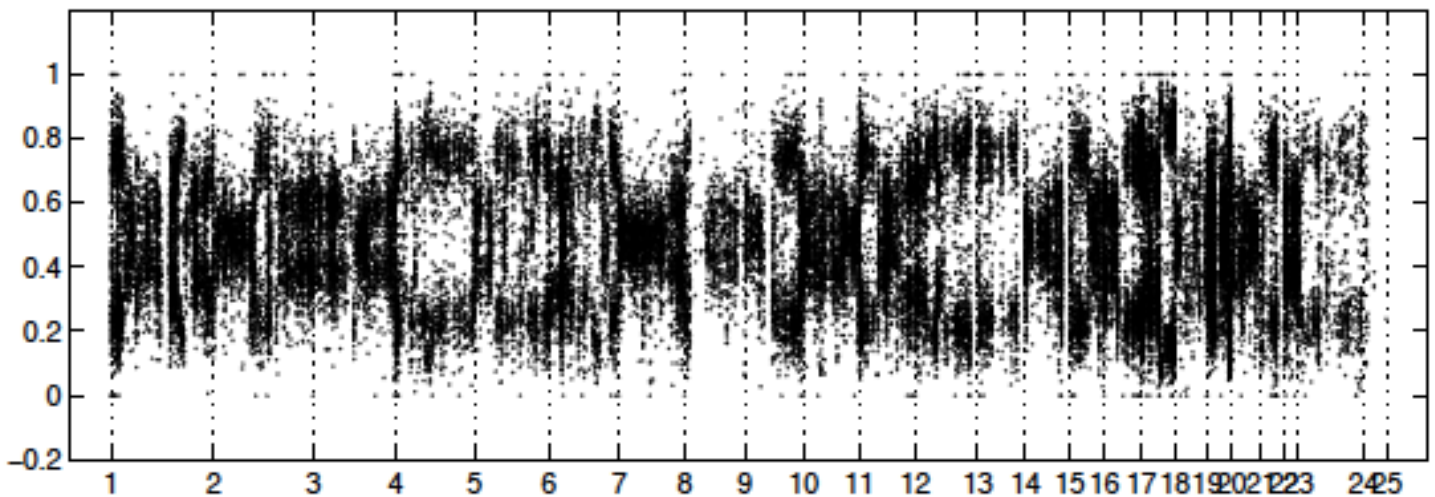

72\_ucsc.edu\_BRCA.IlluminaGA\_DNASeq.Level\_2.14.0.0\_TCGA-AN-A0AT\_W  
germline-het

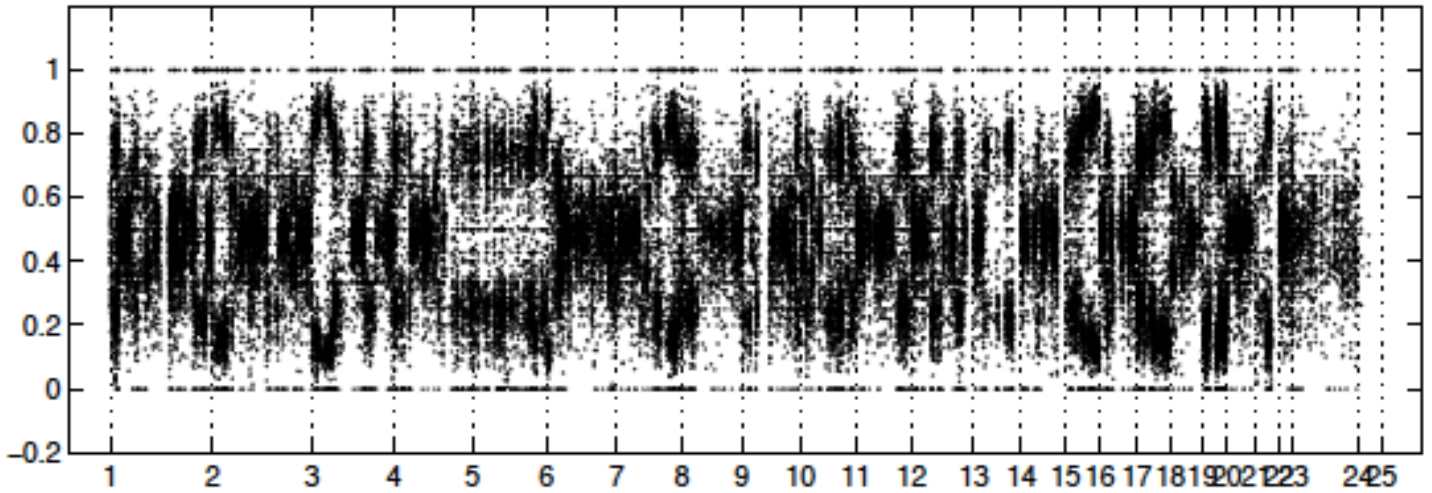

73\_ucsc.edu\_BRCA.IlluminaGA\_DNASeq.Level\_2.6.0.0\_TCGA-AO-A0JB\_W  
germline-het

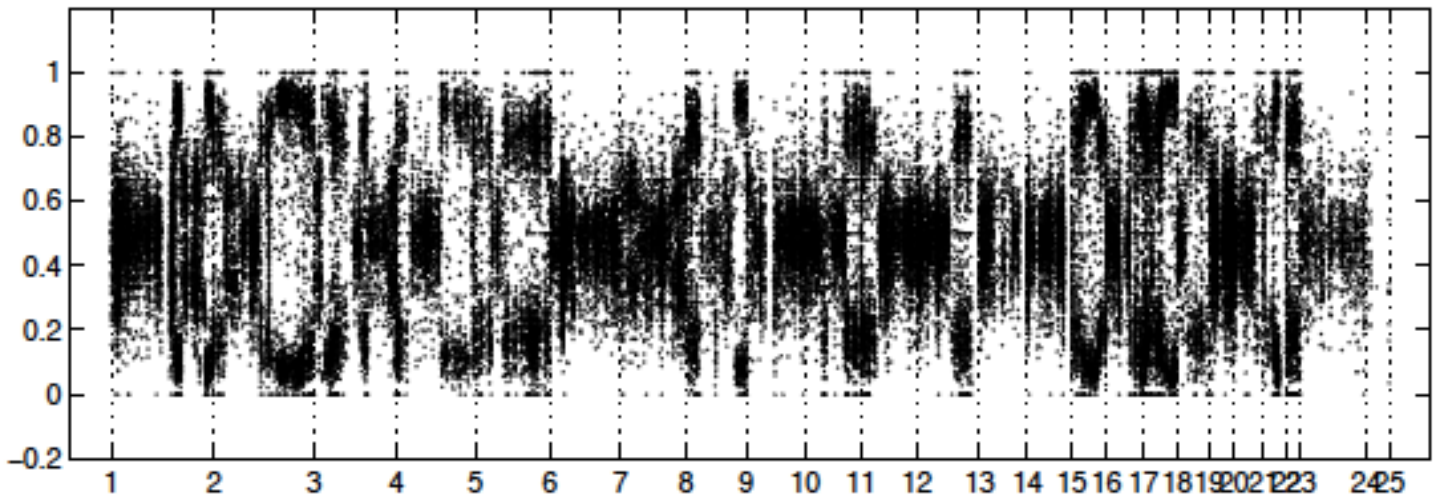

74\_ucsc.edu\_BRCA.IlluminaGA\_DNASeq.Level\_2.6.0.0\_TCGA-AO-A03O\_W  
germline-het

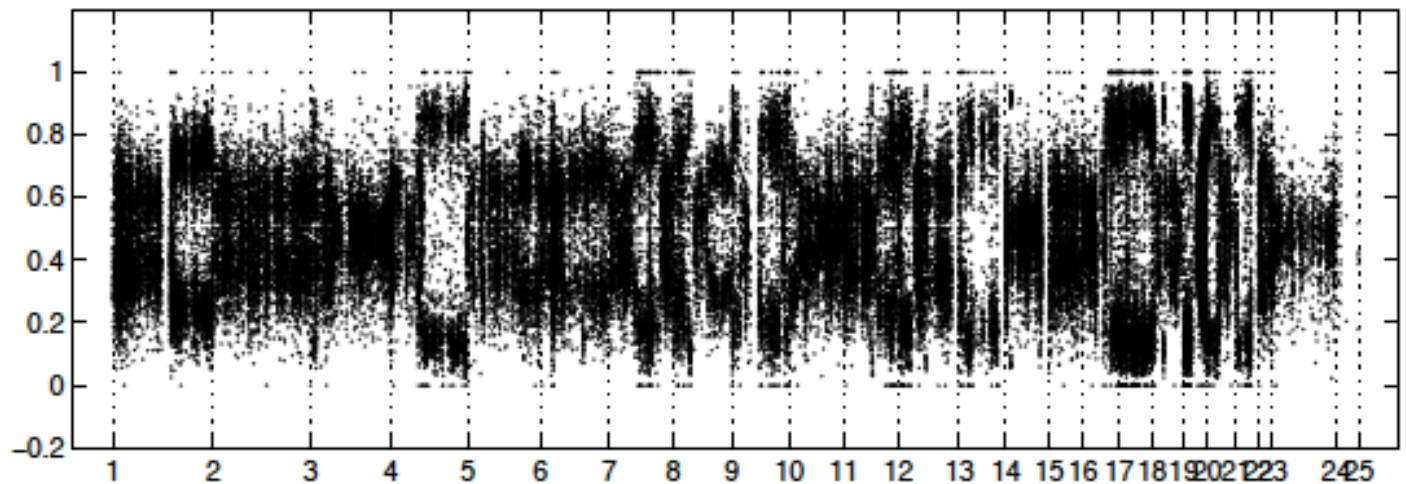

75\_ucsc.edu\_BRCA.IlluminaGA\_DNASeq.Level\_2.4.0.0\_TCGA-A8-A07W\_W  
germline-het

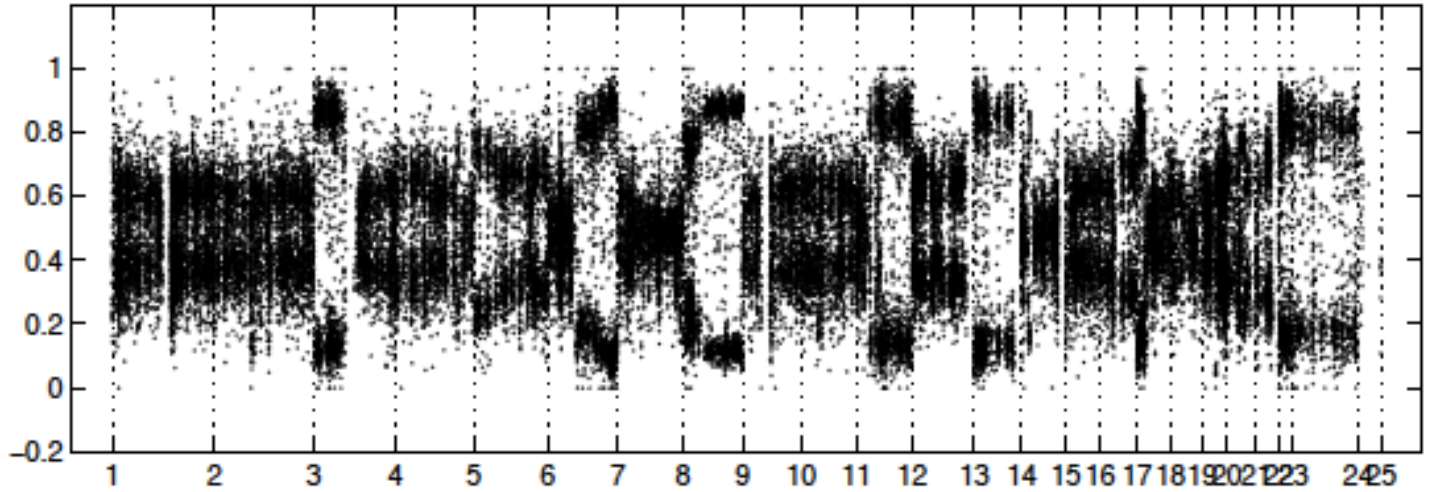

76\_ucsc.edu\_BRCA.IlluminaGA\_DNASeq.Level\_2.4.0.0\_TCGA-A8-A08I\_W  
germline-het

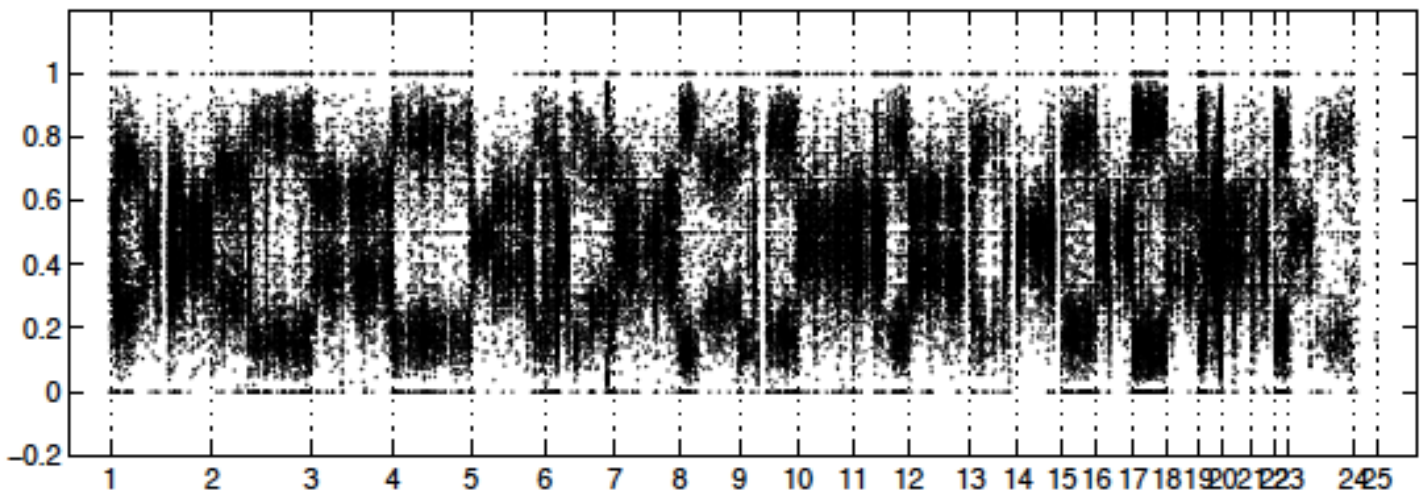

77\_ucsc.edu\_BRCA.IlluminaGA\_DNASeq.Level\_2.9.0.0\_TCGA-B6-A0I2\_W  
germline-het

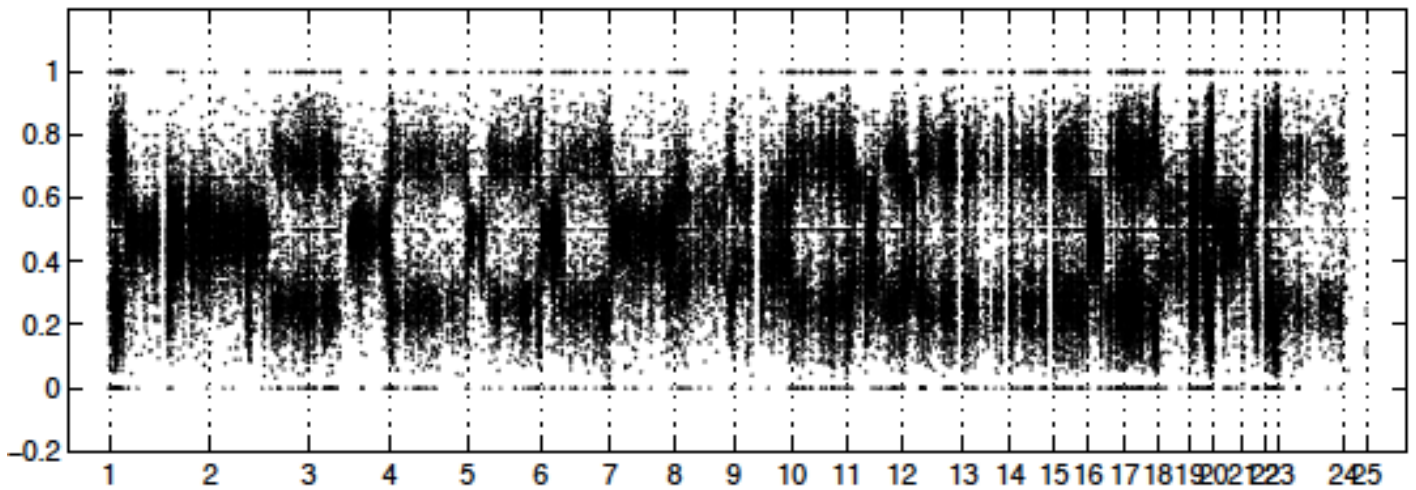

78\_ucsc.edu\_BRCA.IlluminaGA\_DNASeq.Level\_2.4.0.0\_TCGA-A8-A06O\_W  
germline-het

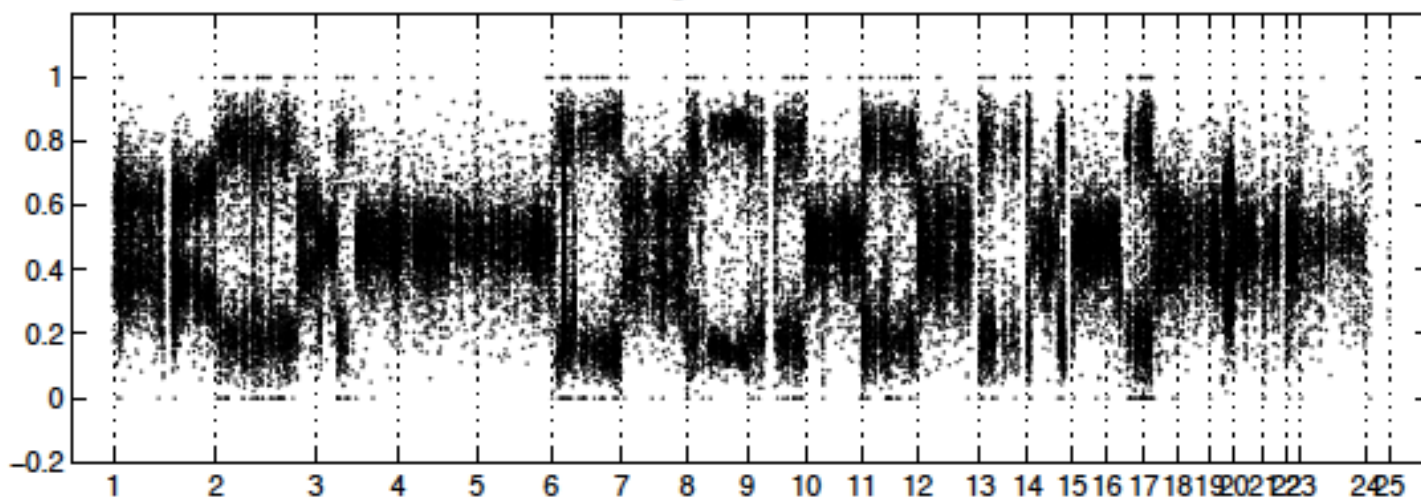

79\_ucsc.edu\_BRCA.IlluminaGA\_DNASeq.Level\_2.8.0.0\_TCGA-AR-A0U0\_D  
germline-het

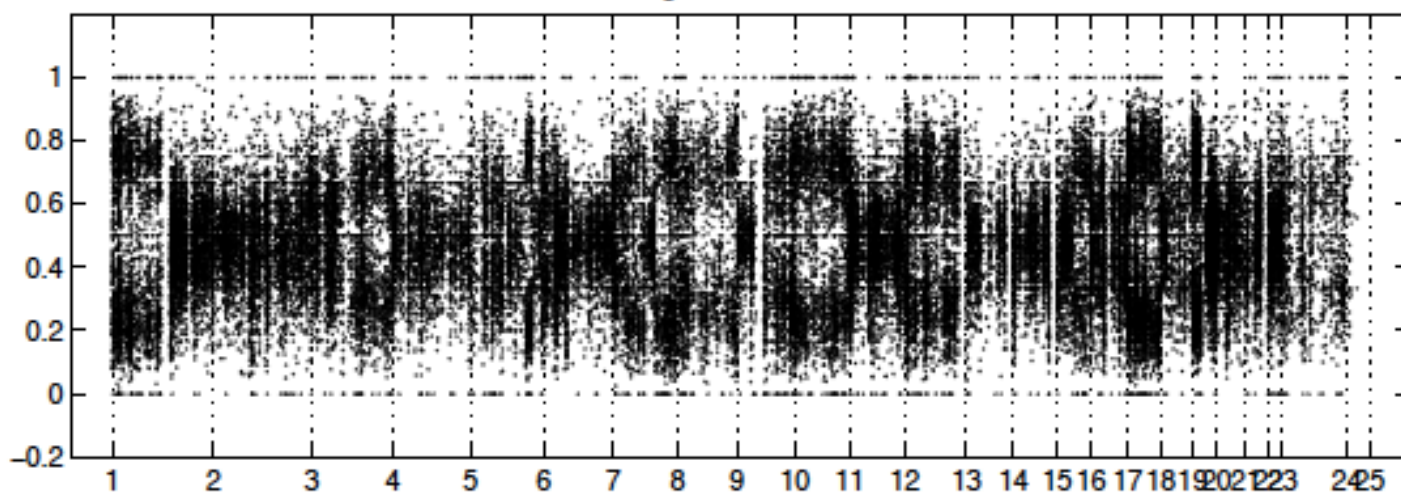

80\_ucsc.edu\_BRCA.IlluminaGA\_DNASeq.Level\_2.4.0.0\_TCGA-A8-A075\_D  
germline-het

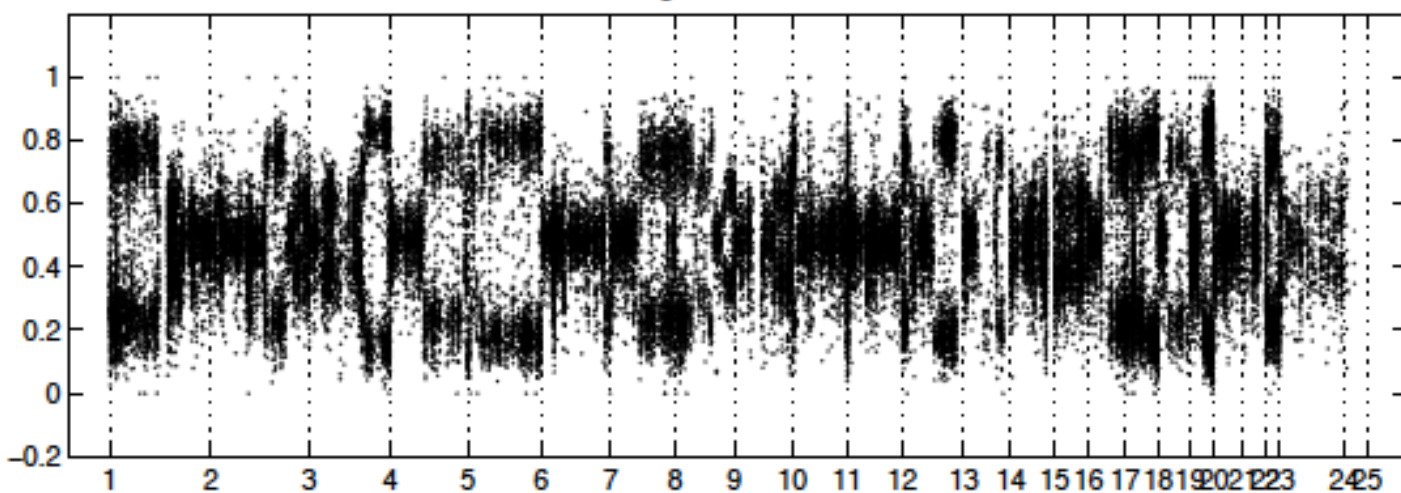

81\_ucsc.edu\_BRCA.IlluminaGA\_DNASeq.Level\_2.2.0.0\_TCGA-A2-A0T3\_D  
germline-het

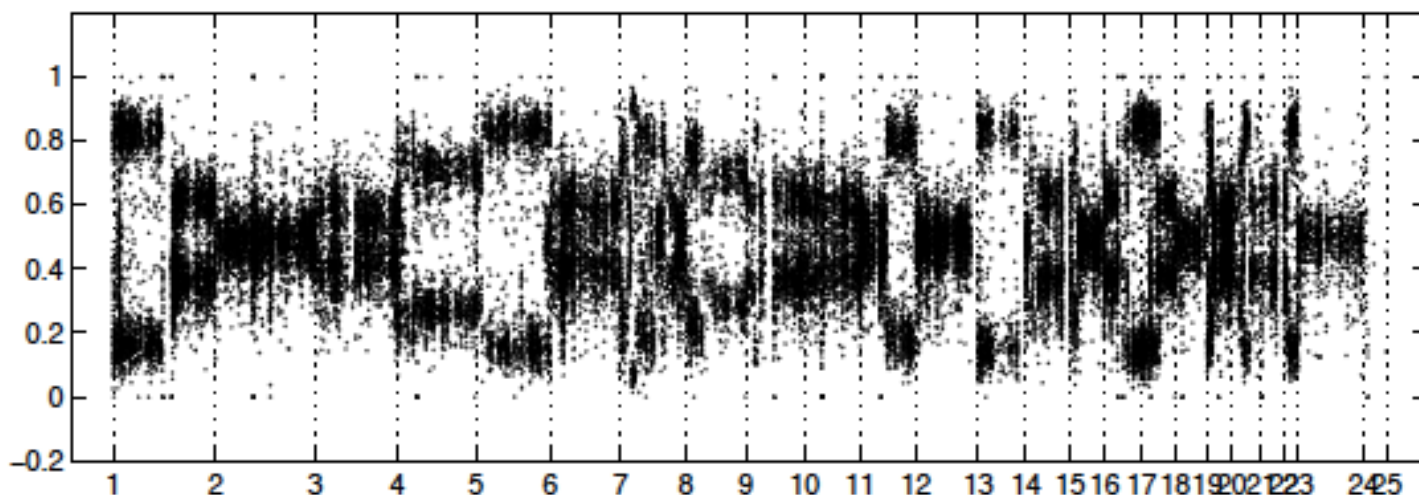

82\_ucsc.edu\_BRCA.IlluminaGA\_DNASeq.Level\_2.14.0.0\_TCGA-B6-A0RS\_W  
germline-het

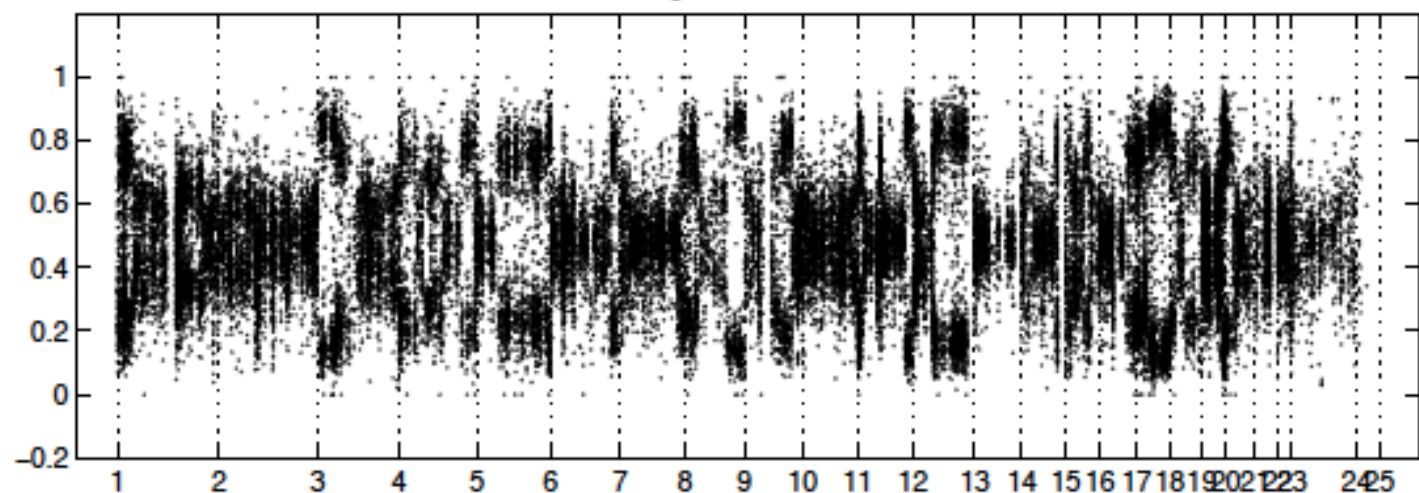

83\_ucsc.edu\_BRCA.IlluminaGA\_DNASeq.Level\_2.2.0.0\_TCGA-A2-A0YJ\_D  
germline-het

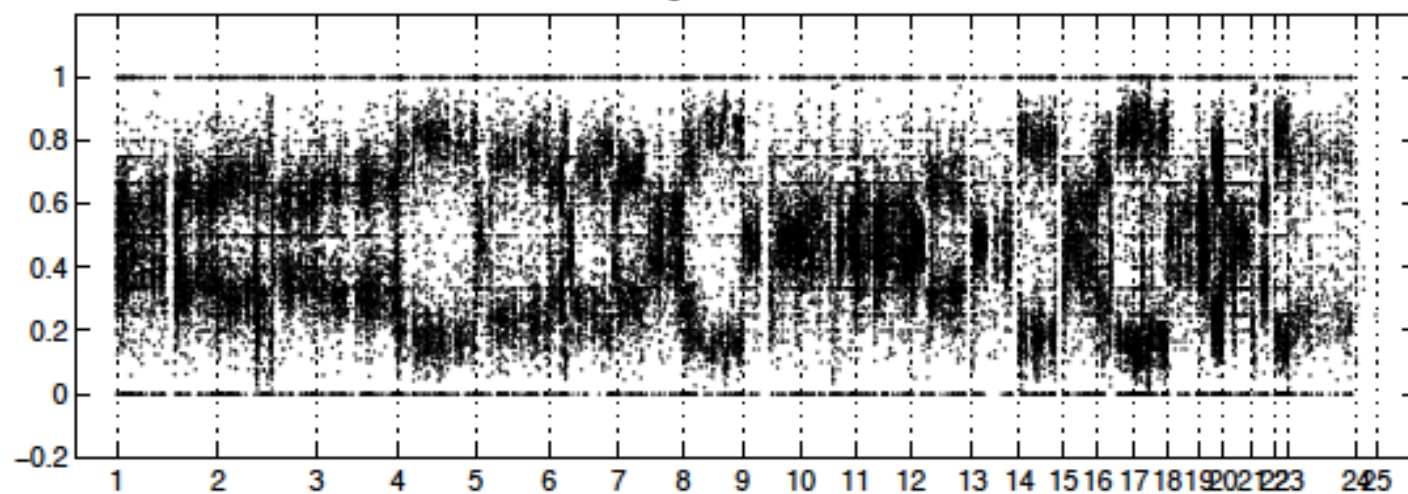

84\_ucsc.edu\_BRCA.IlluminaGA\_DNASeq.Level\_2.4.0.0\_TCGA-A8-A06Z\_W  
germline-het

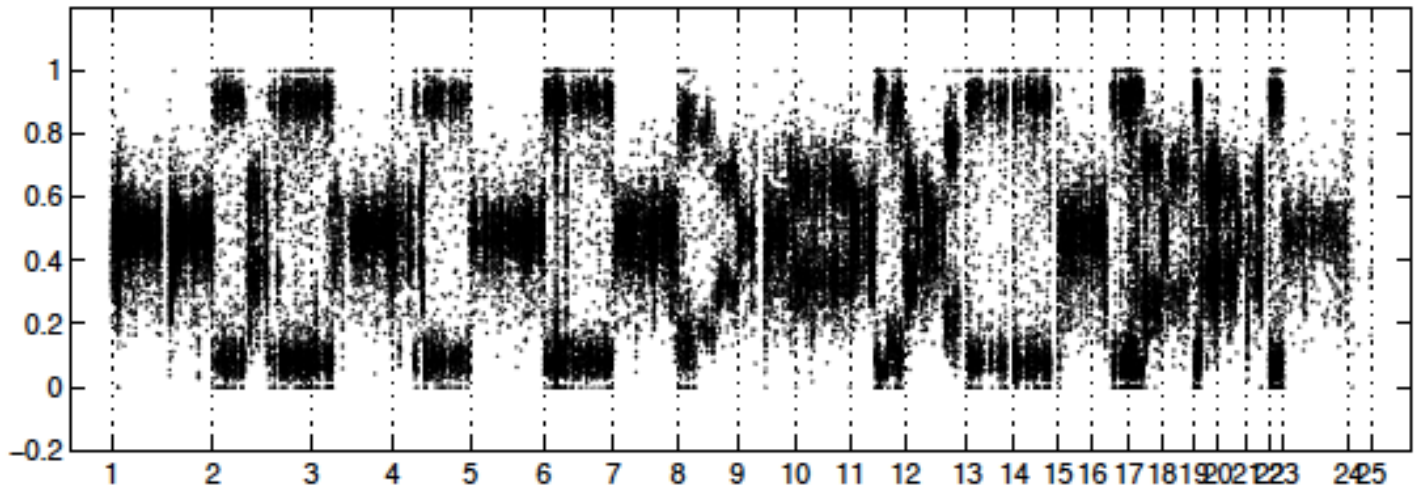

85\_ucsc.edu\_BRCA.IlluminaGA\_DNASeq.Level\_2.5.0.0\_TCGA-AN-A0AL\_W  
germline-het

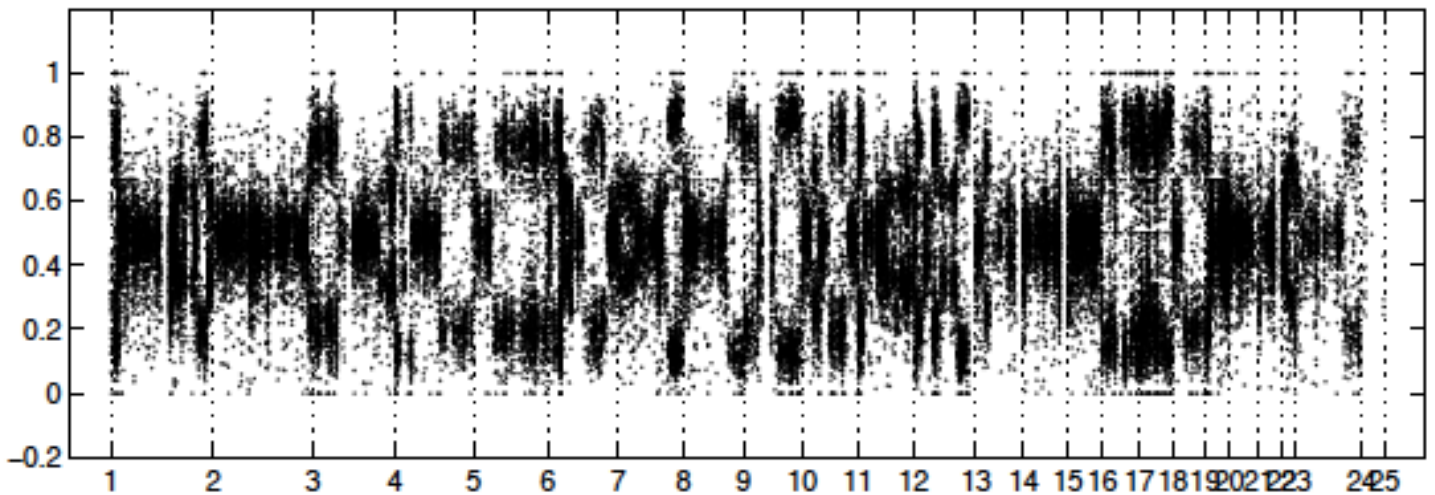

86\_ucsc.edu\_BRCA.IlluminaGA\_DNASeq.Level\_2.10.0.0\_TCGA-BH-A0HX\_W  
germline-het

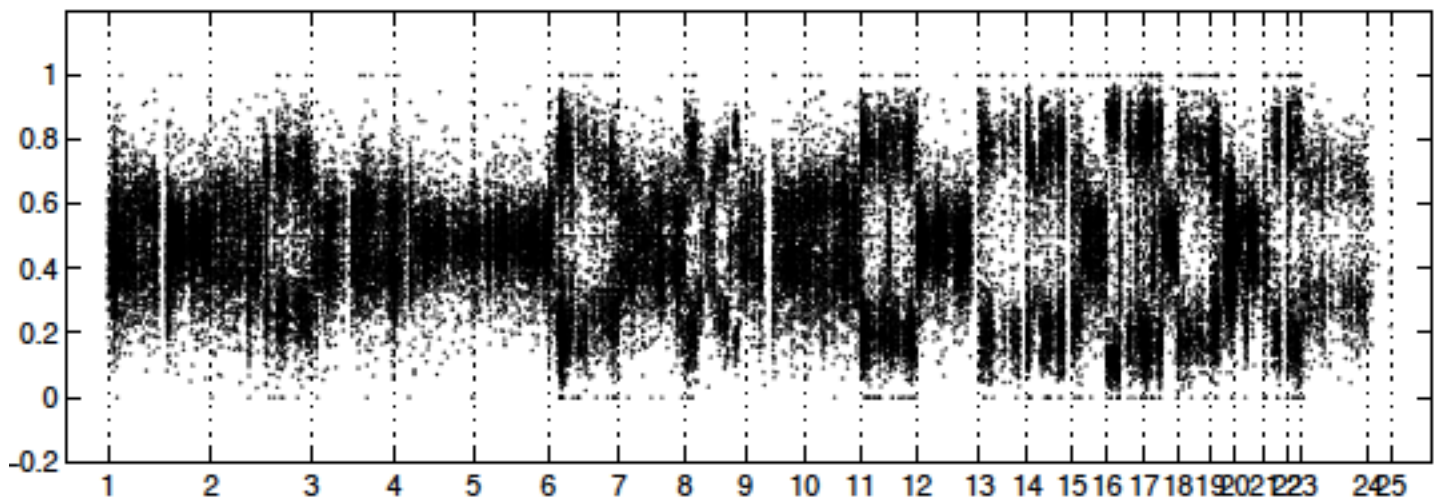

87\_ucsc.edu\_BRCA.IlluminaGA\_DNASeq.Level\_2.4.0.0\_TCGA-A8-A09Q\_W  
germline-het

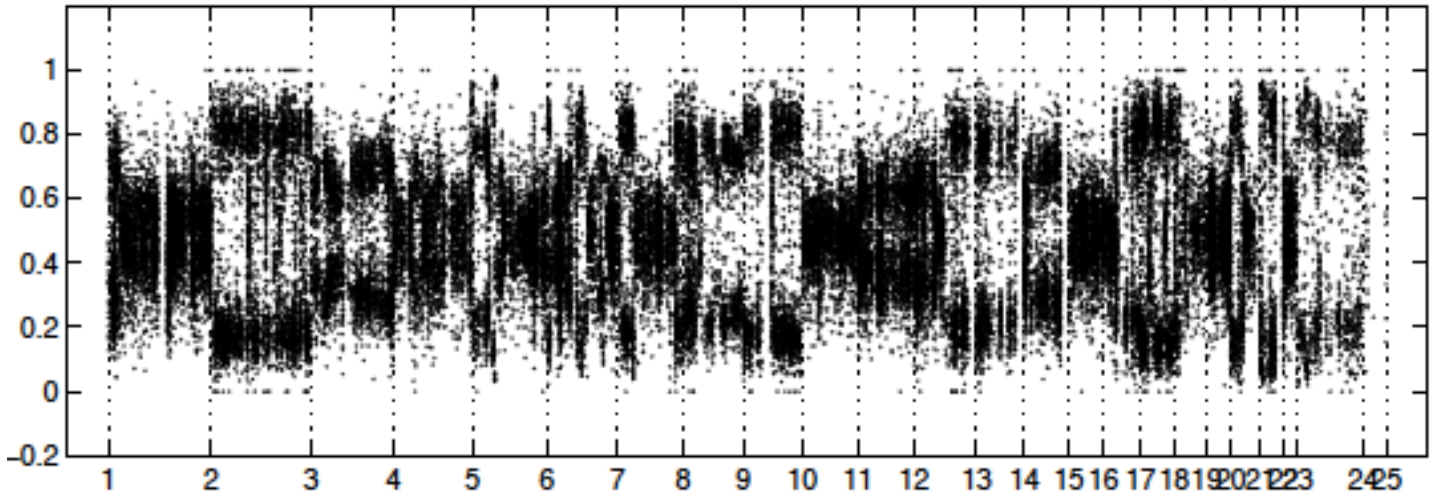

88\_ucsc.edu\_BRCA.IlluminaGA\_DNASeq.Level\_2.5.0.0\_TCGA-AN-A0FW\_W  
germline-het

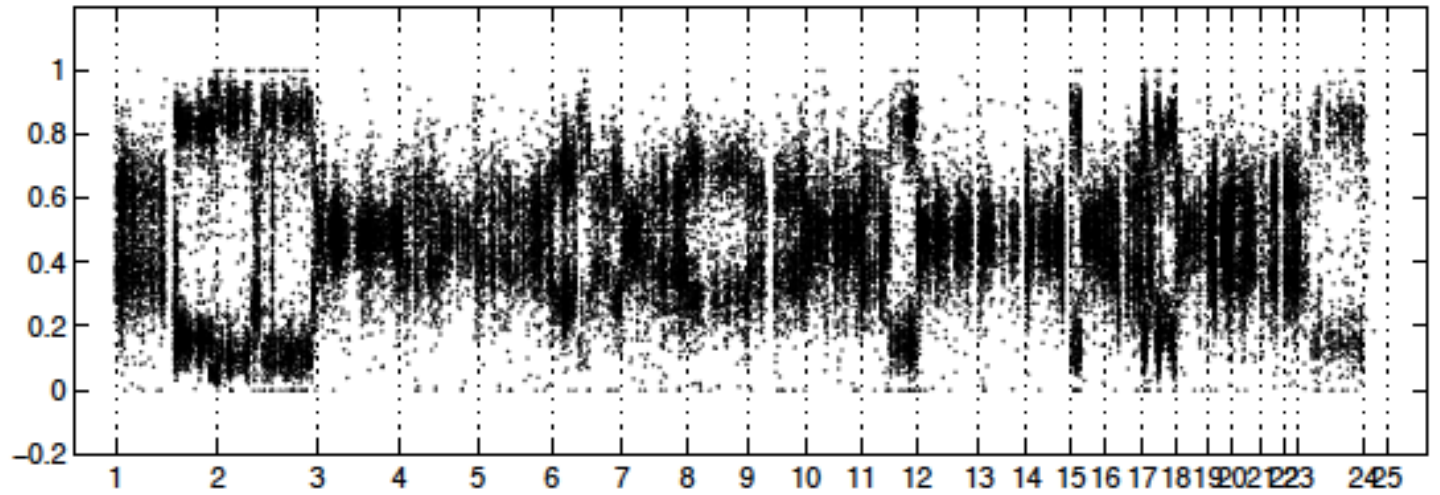

89\_ucsc.edu\_BRCA.IlluminaGA\_DNASeq.Level\_2.5.0.0\_TCGA-AN-A03Y\_W  
germline-het

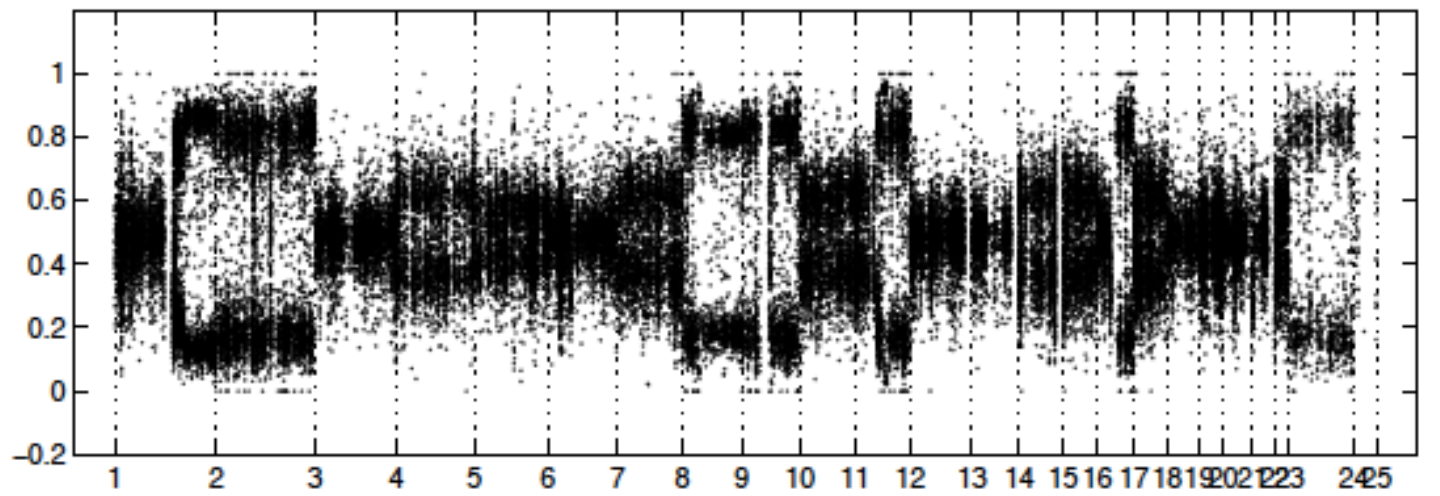

90\_ucsc.edu\_BRCA.IlluminaGA\_DNASeq.Level\_2.12.0.0\_TCGA-D8-A142\_D  
germline-het

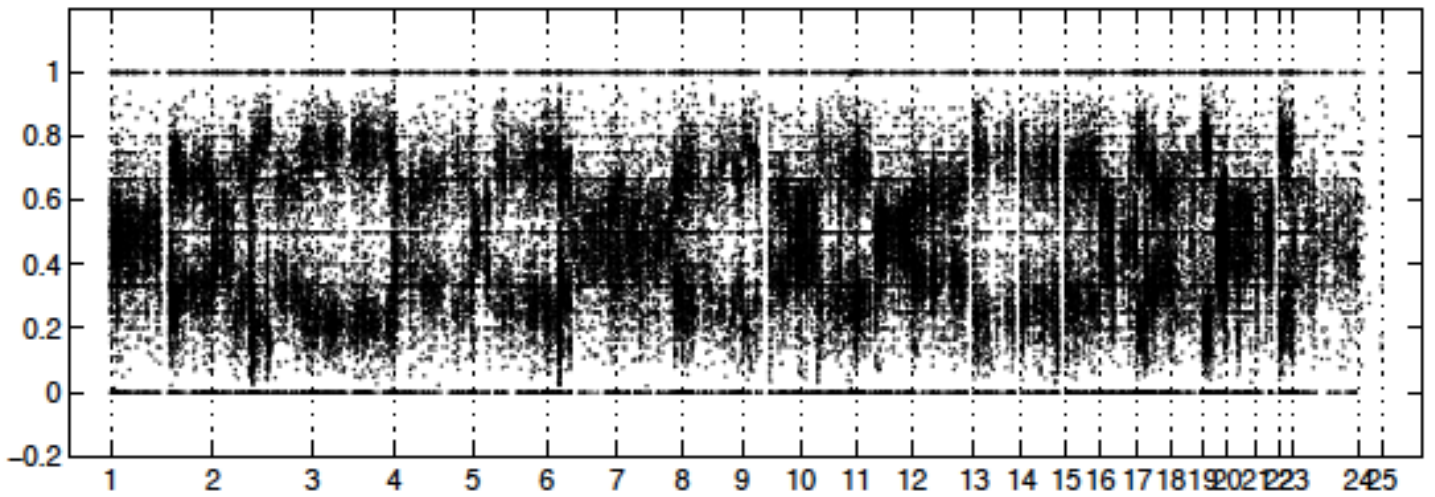

91\_ucsc.edu\_BRCA.IlluminaGA\_DNASeq.Level\_2.13.0.0\_TCGA-E2-A109\_D  
germline-het

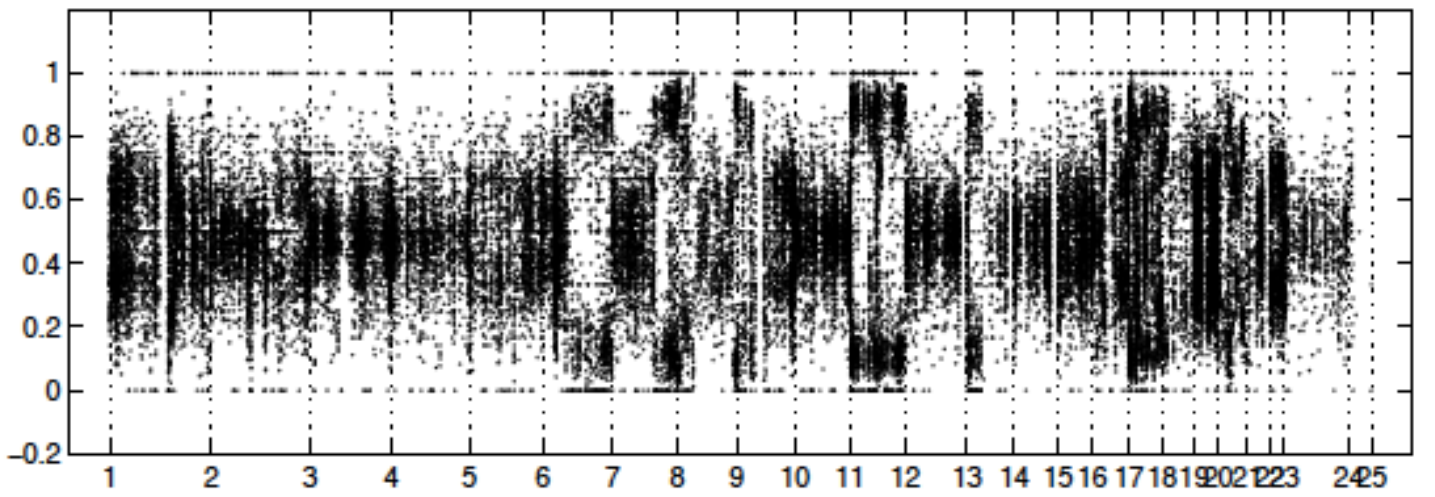

92\_ucsc.edu\_BRCA.IlluminaGA\_DNASeq.Level\_2.10.0.0\_TCGA-BH-A0H7\_W  
germline-het

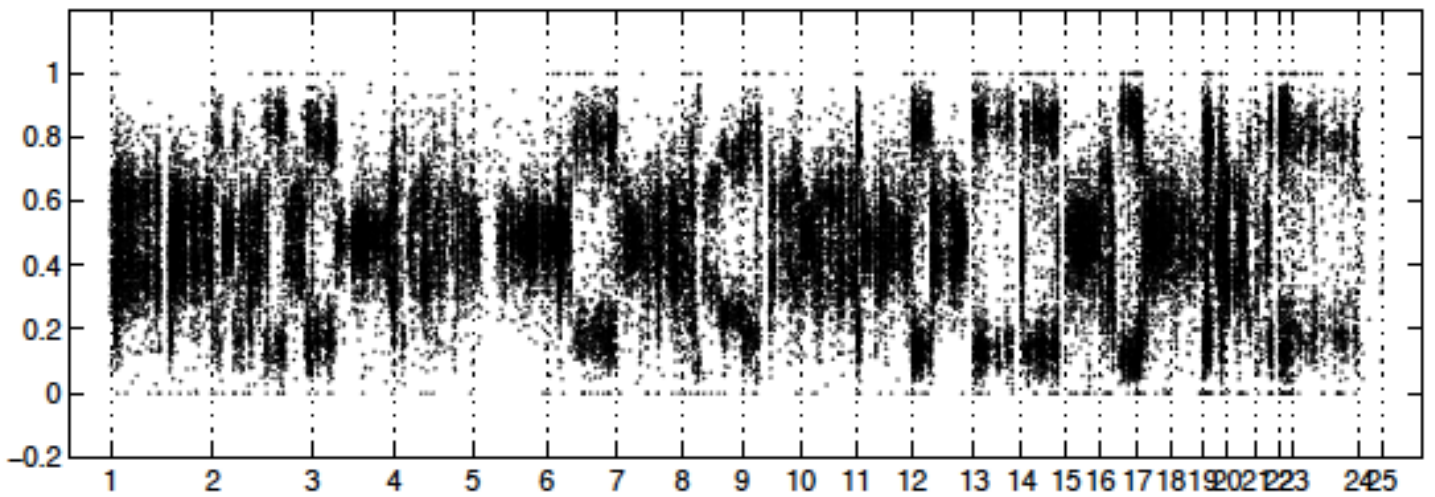



93\_ucsc.edu\_BRCA.IlluminaGA\_DNASeq.Level\_2.14.0.0\_TCGA-AN-A04C\_W  
germline-het

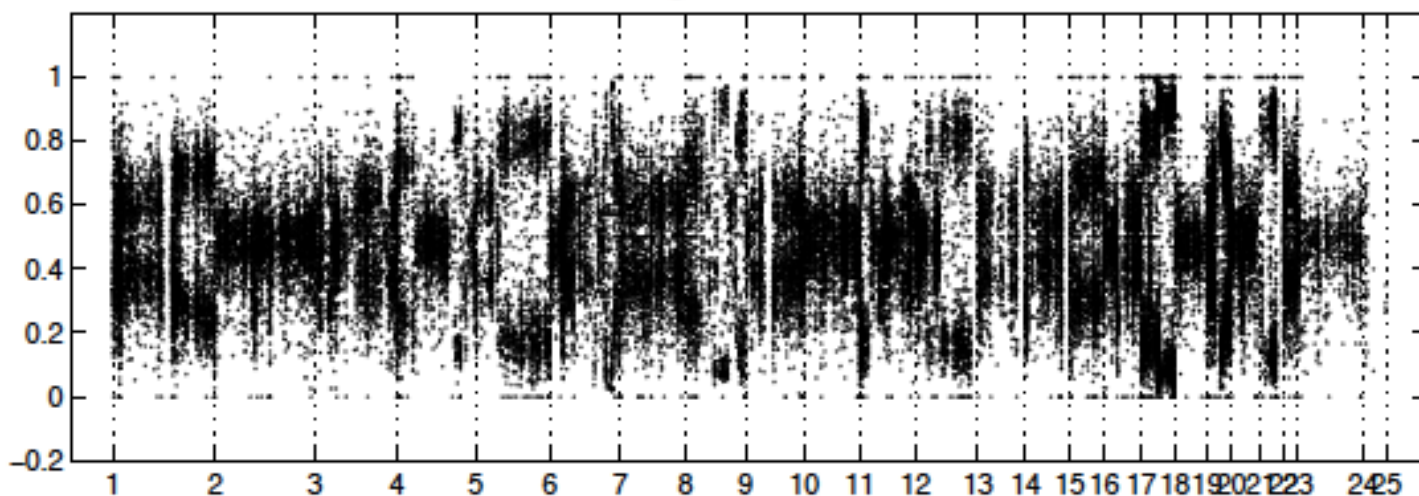

94\_ucsc.edu\_BRCA.IlluminaGA\_DNASeq.Level\_2.13.0.0\_TCGA-E2-A15A\_D  
germline-het

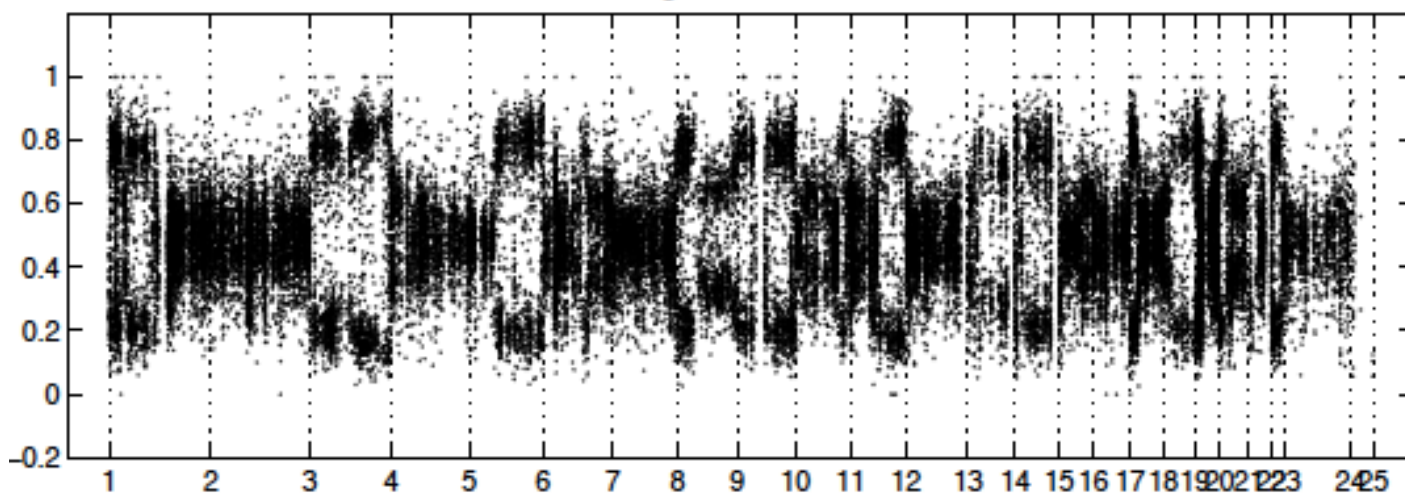

95\_ucsc.edu\_BRCA.IlluminaGA\_DNASeq.Level\_2.8.0.0\_TCGA-AR-A1AP\_D  
germline-het

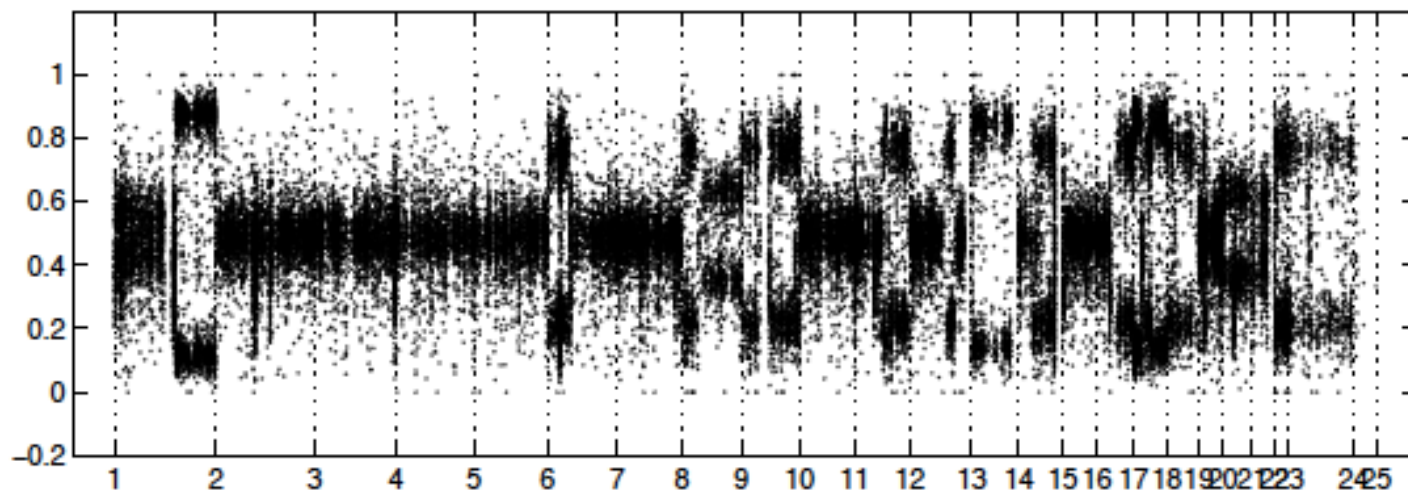

96\_ucsc.edu\_BRCA.IlluminaGA\_DNASeq.Level\_2.10.0.0\_TCGA-BH-A18L\_D  
germline-het

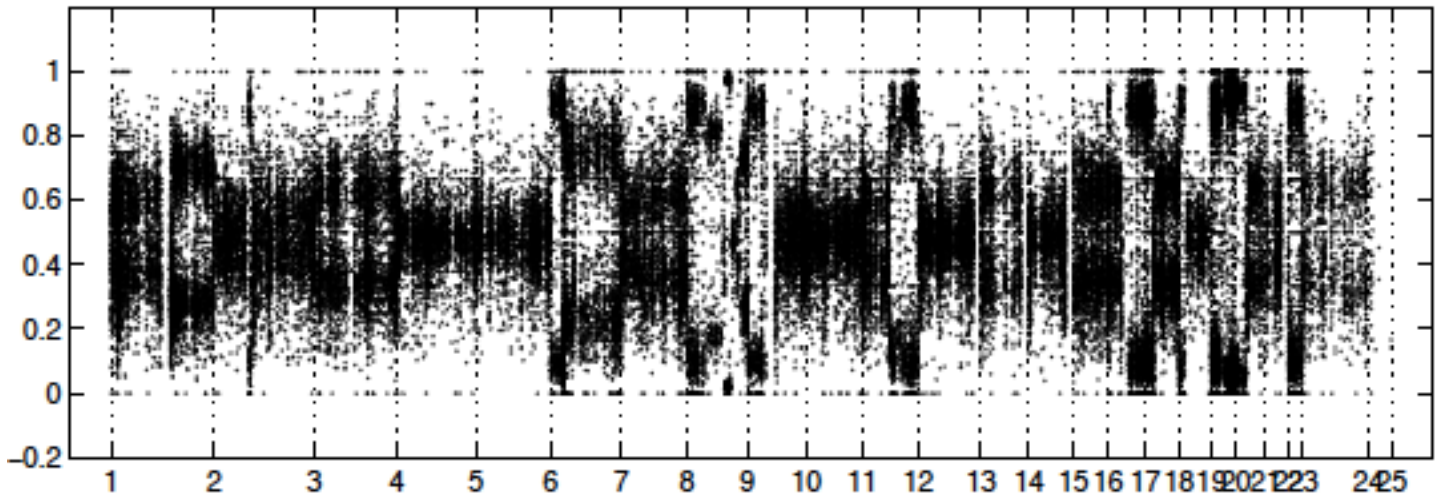

97\_ucsc.edu\_BRCA.IlluminaGA\_DNASeq.Level\_2.4.0.0\_TCGA-A8-A09N\_W  
germline-het

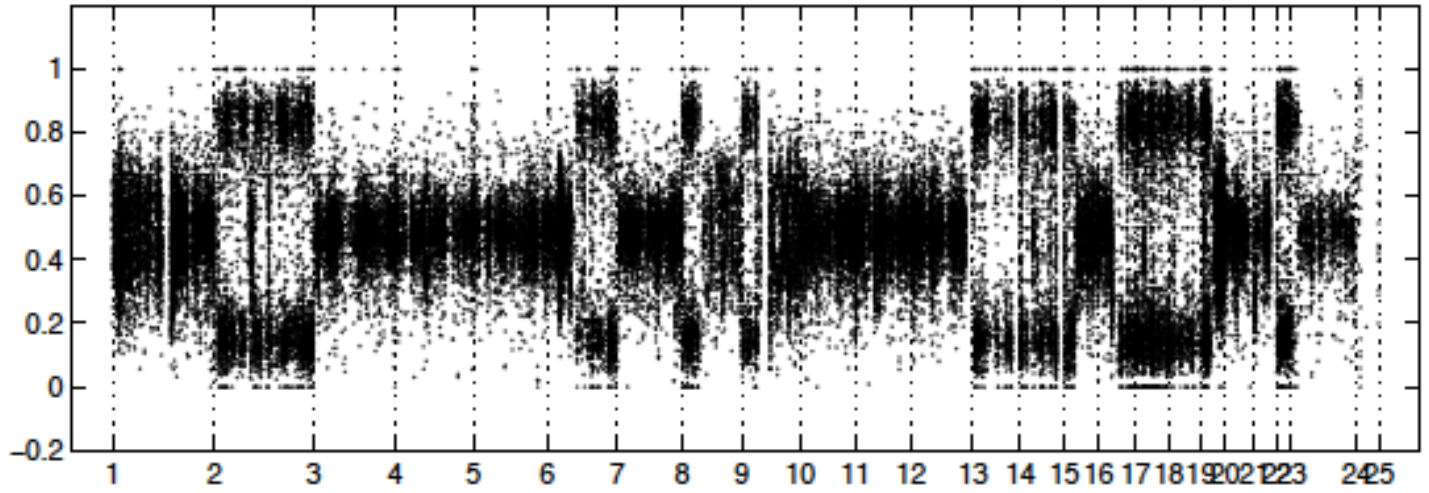

98\_ucsc.edu\_BRCA.IlluminaGA\_DNASeq.Level\_2.2.0.0\_TCGA-A2-A0EY\_W  
germline-het

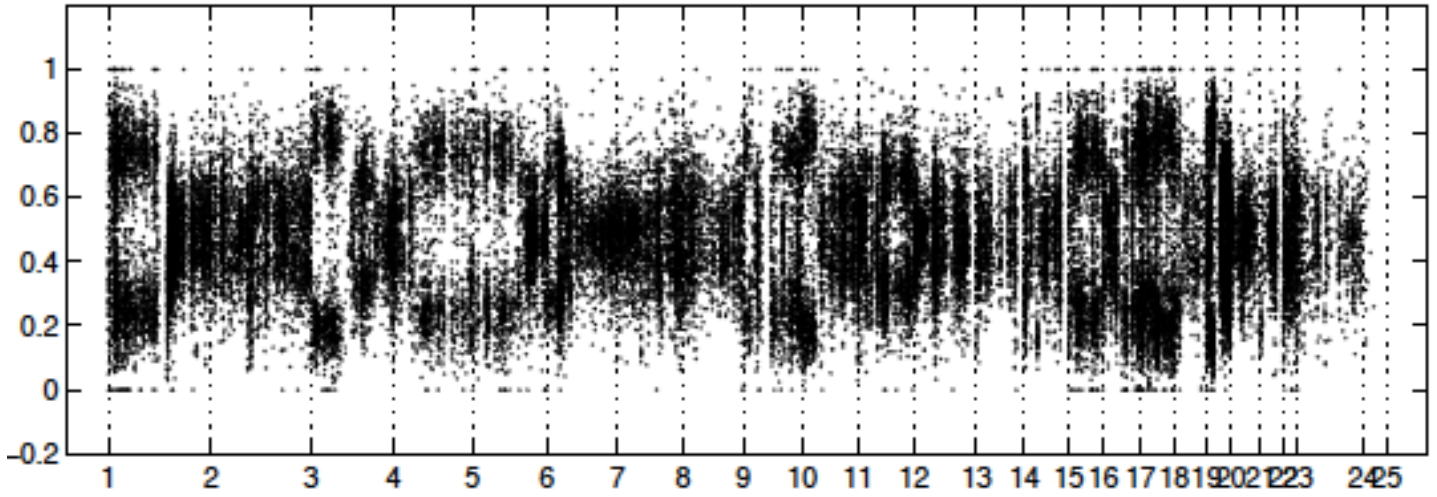

99\_ucsc.edu\_BRCA.IlluminaGA\_DNASeq.Level\_2.10.0.0\_TCGA-BH-A0BT\_D  
germline-het

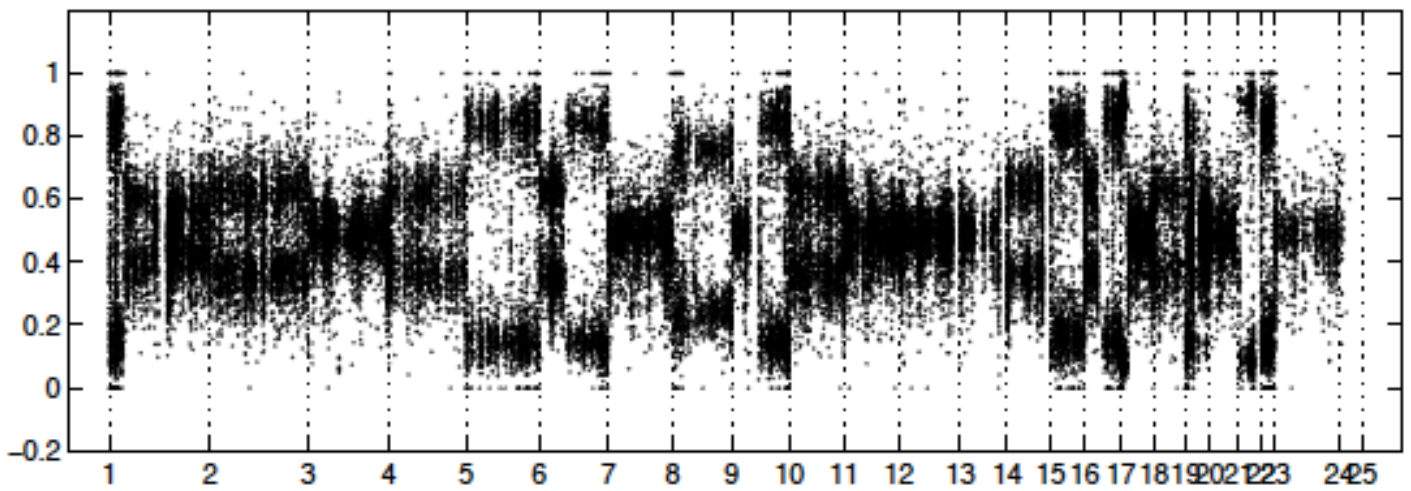

100\_ucsc.edu\_BRCA.IlluminaGA\_DNASeq.Level\_2.4.0.0\_TCGA-A8-A08F\_W  
germline-het

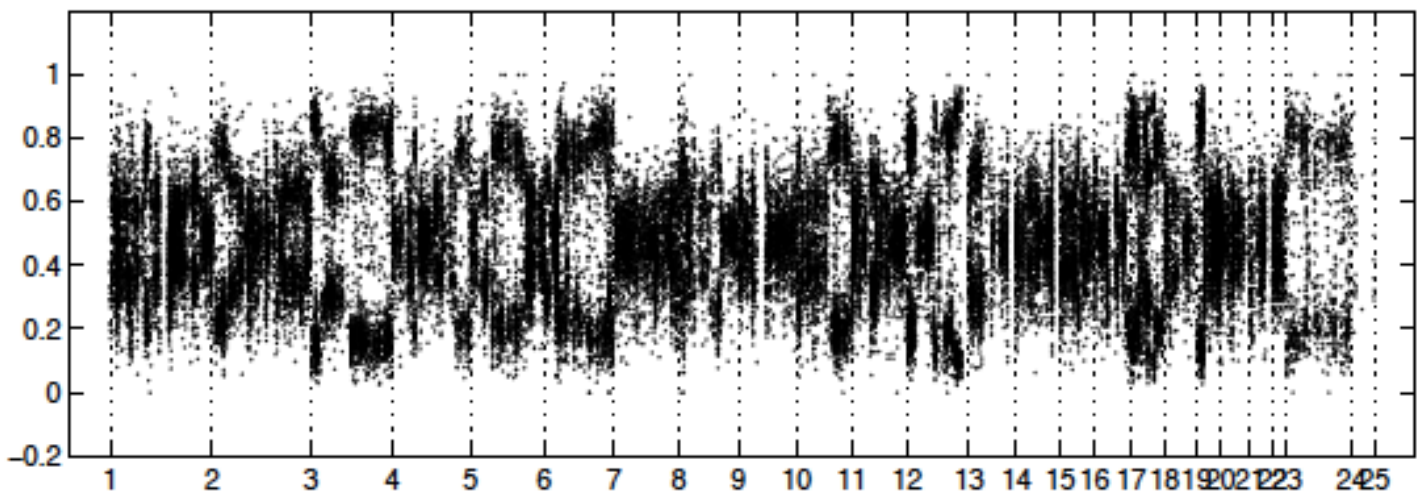

101\_ucsc.edu\_BRCA.IlluminaGA\_DNASeq.Level\_2.5.0.0\_TCGA-AN-A0FZ\_W  
germline-het

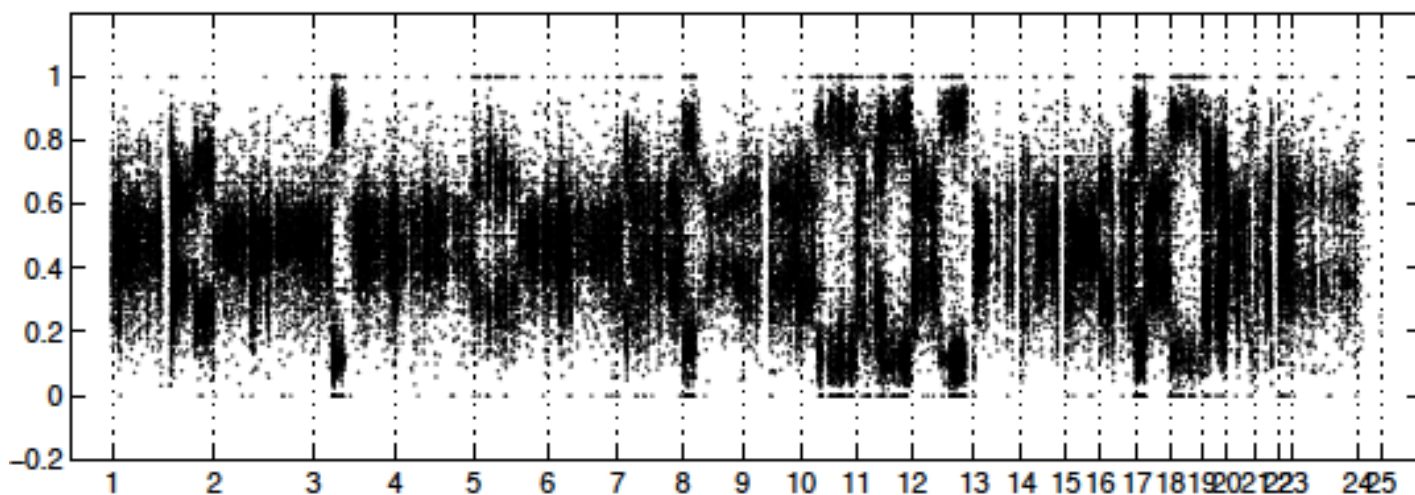

102\_ucsc.edu\_BRCA.IlluminaGA\_DNASeq.Level\_2.8.0.0\_TCGA-AR-A1AQ\_D  
germline-het

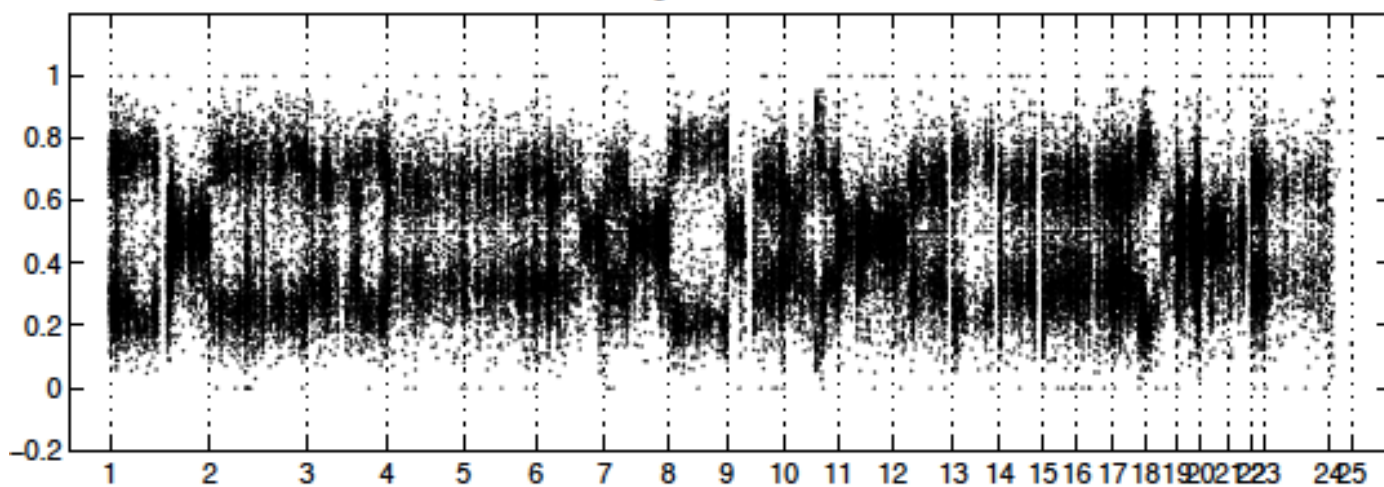

103\_ucsc.edu\_BRCA.IlluminaGA\_DNASeq.Level\_2.2.0.0\_TCGA-A2-A0SX\_D  
germline-het

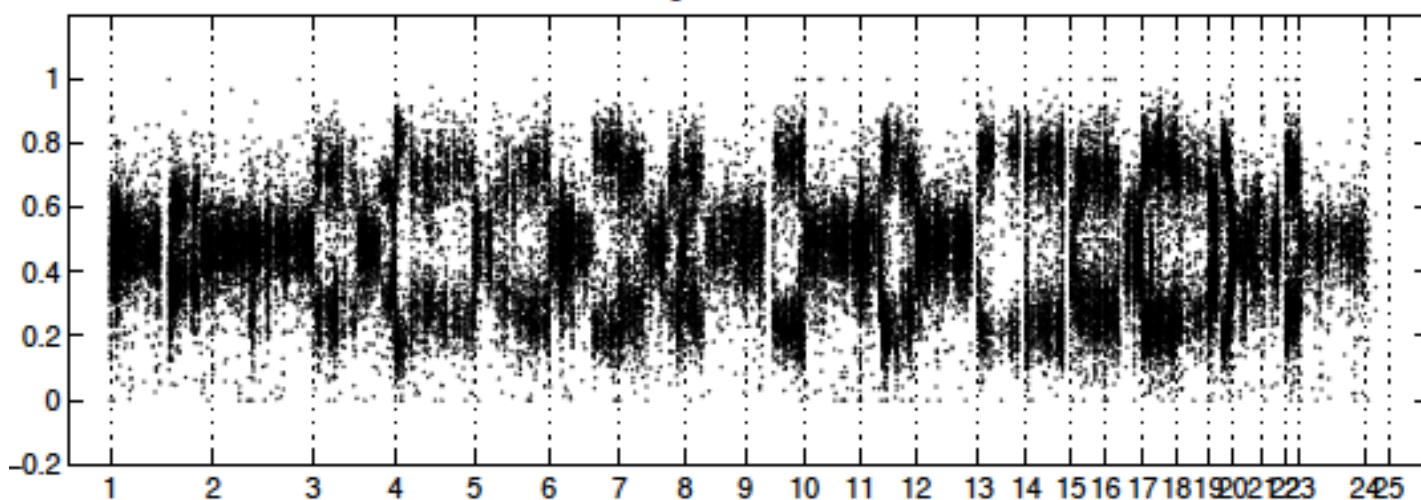

104\_ucsc.edu\_BRCA.IlluminaGA\_DNASeq.Level\_2.5.0.0\_TCGA-AN-A0AJ\_W  
germline-het

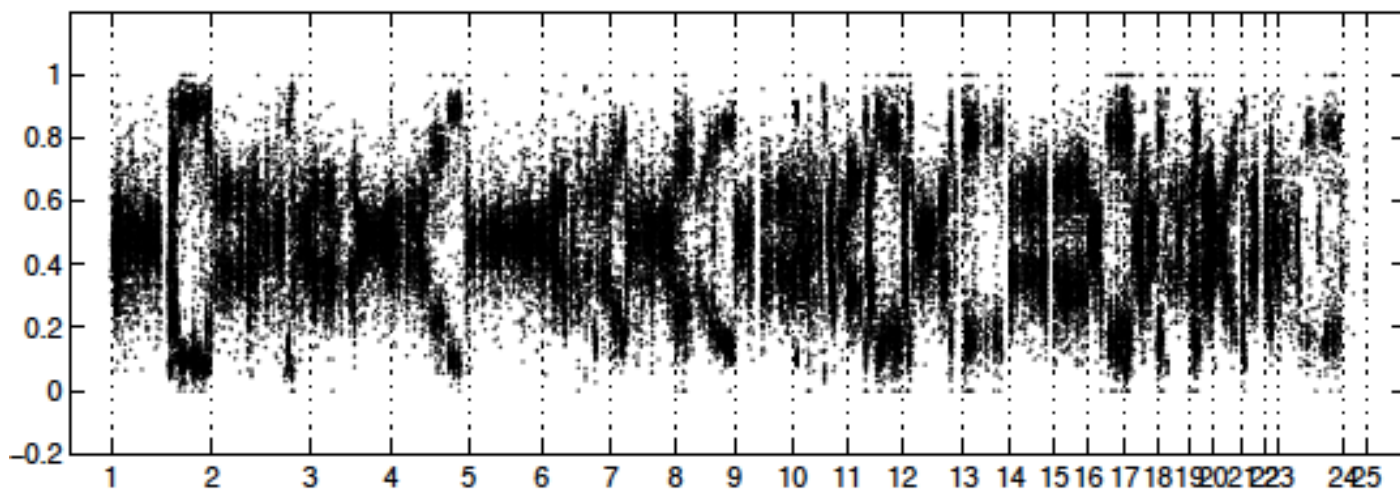

105\_ucsc.edu\_BRCA.IlluminaGA\_DNASeq.Level\_2.10.0.0\_TCGA-BH-A0HU\_W  
germline-het

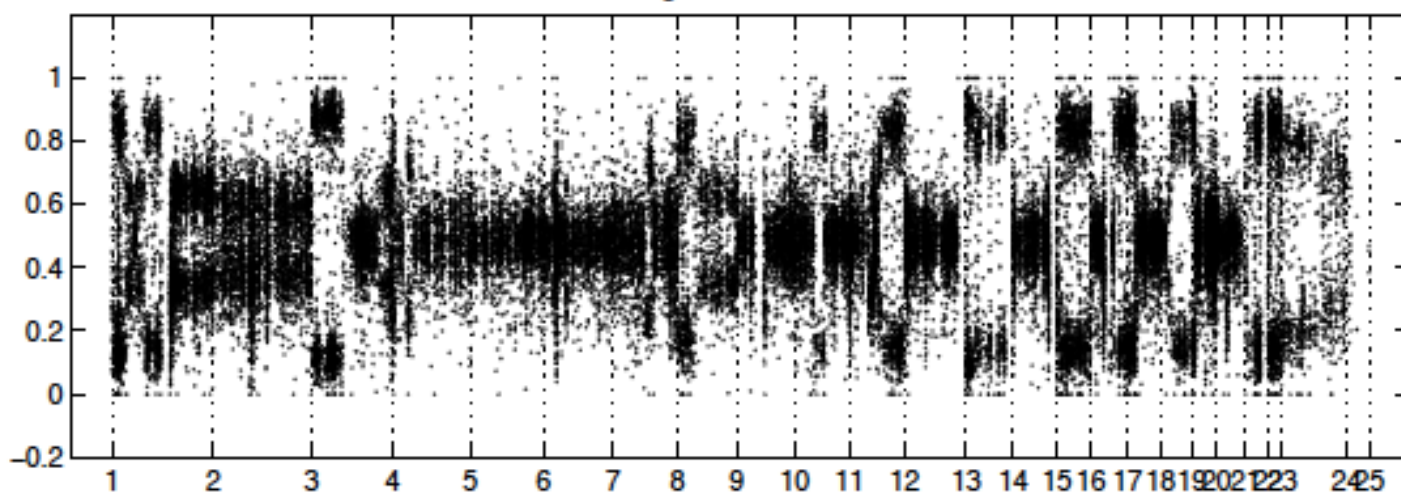

106\_ucsc.edu\_BRCA.IlluminaGA\_DNASeq.Level\_2.11.0.0\_TCGA-C8-A12M\_D  
germline-het

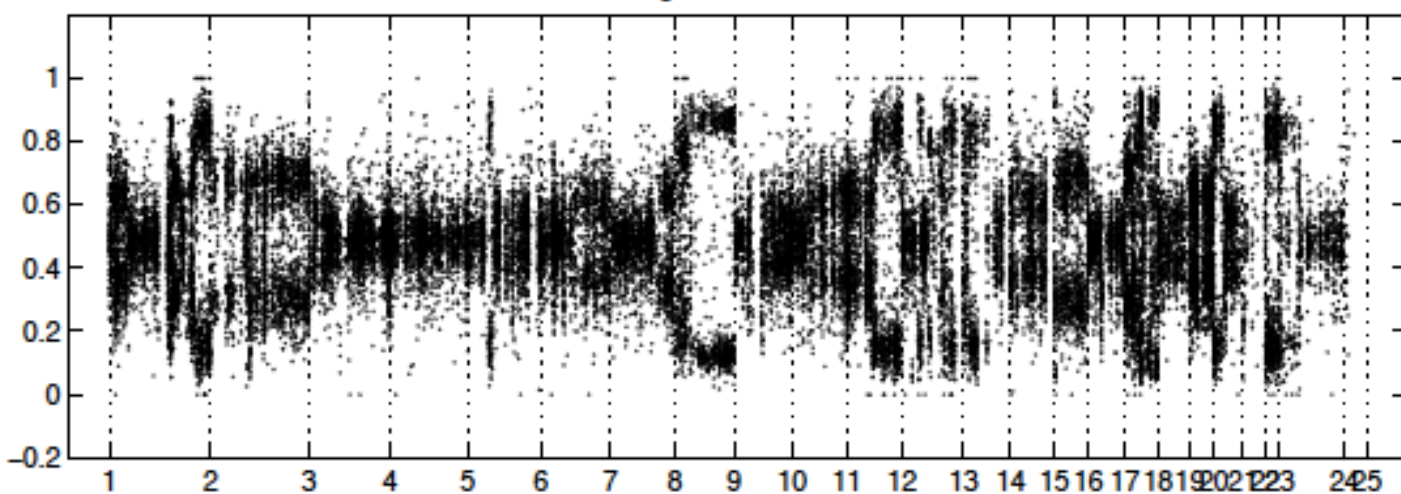

107\_ucsc.edu\_BRCA.IlluminaGA\_DNASeq.Level\_2.10.0.0\_TCGA-BH-A0B3\_W  
germline-het

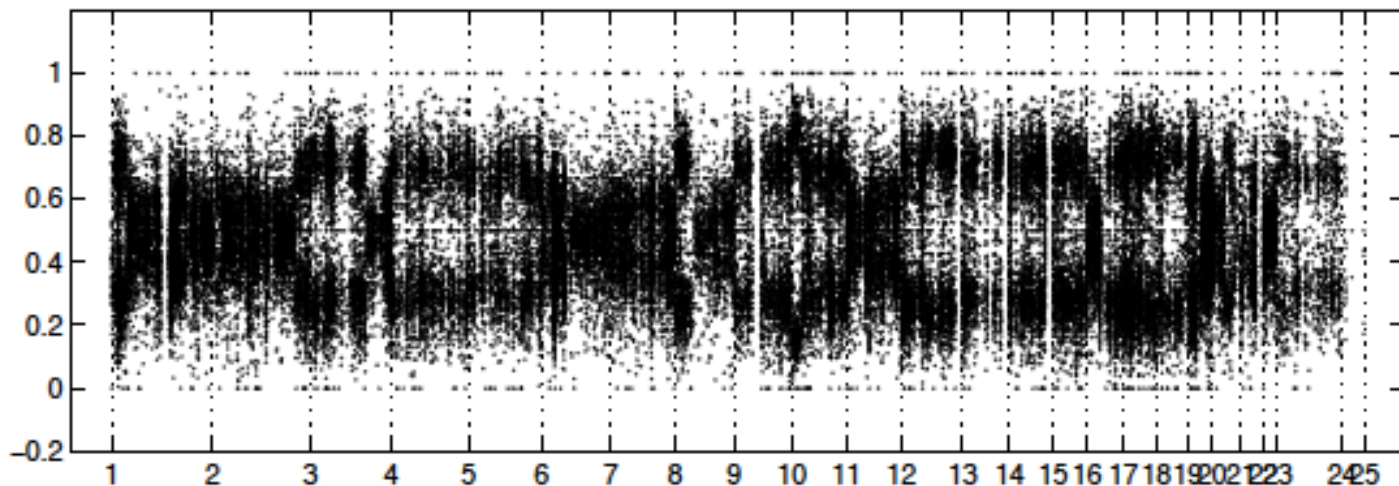

108\_ucsc.edu\_BRCA.IlluminaGA\_DNASeq.Level\_2.14.0.0\_TCGA-A2-A0SW\_W  
germline-het

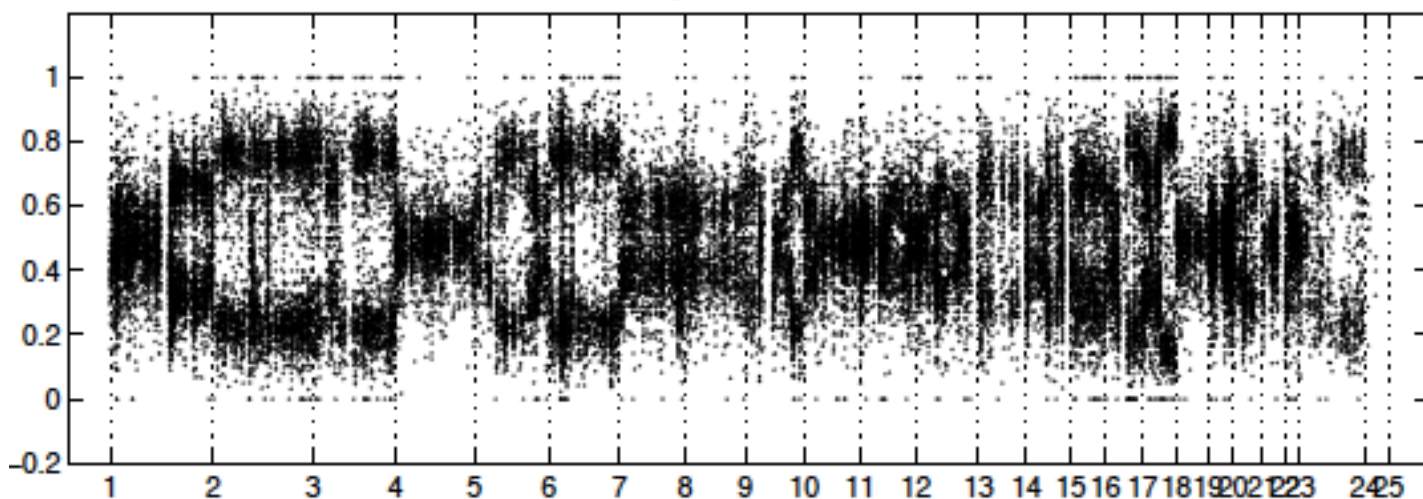

109\_ucsc.edu\_BRCA.IlluminaGA\_DNASeq.Level\_2.4.0.0\_TCGA-A8-A079\_W  
germline-het

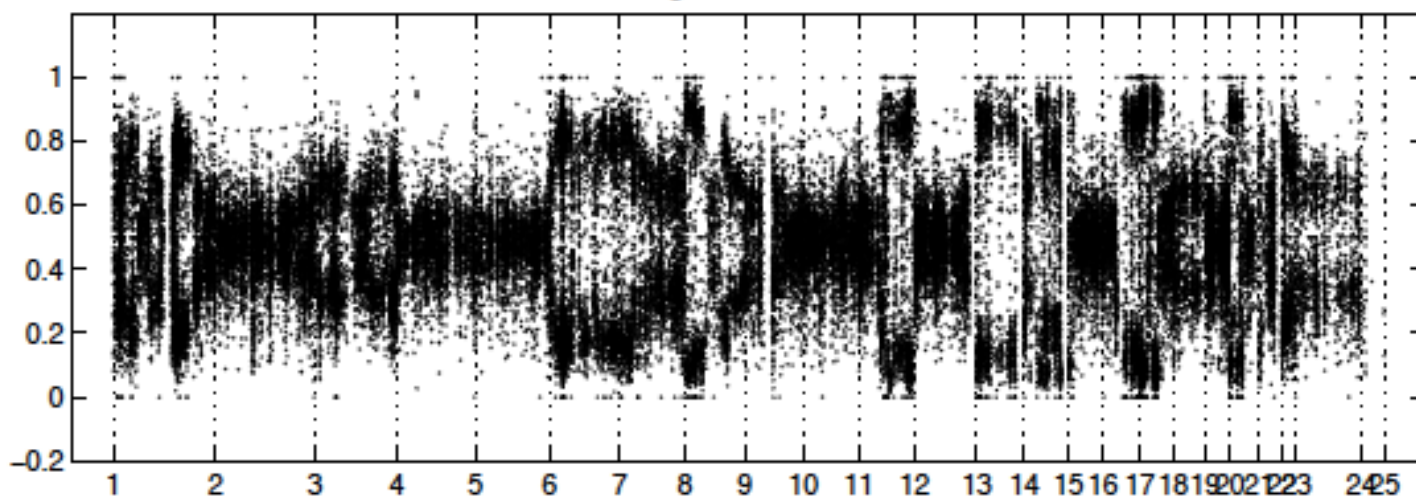

110\_ucsc.edu\_BRCA.IlluminaGA\_DNASeq.Level\_2.4.0.0\_TCGA-A8-A08S\_W  
germline-het

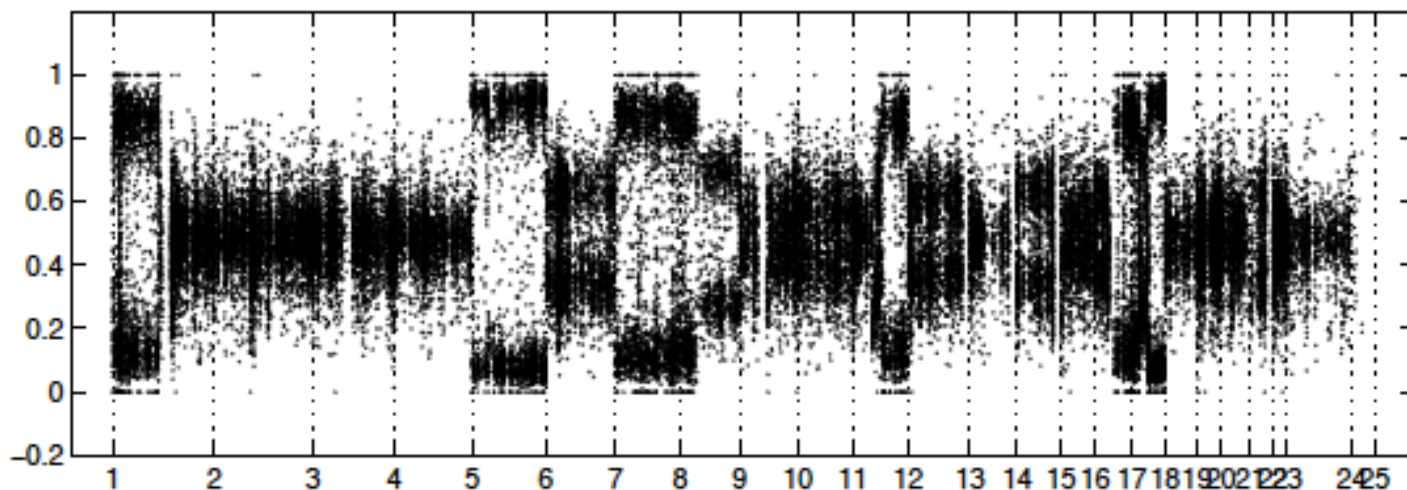

111\_ucsc.edu\_BRCA.IlluminaGA\_DNASeq.Level\_2.13.0.0\_TCGA-E2-A1AZ\_D  
germline-het

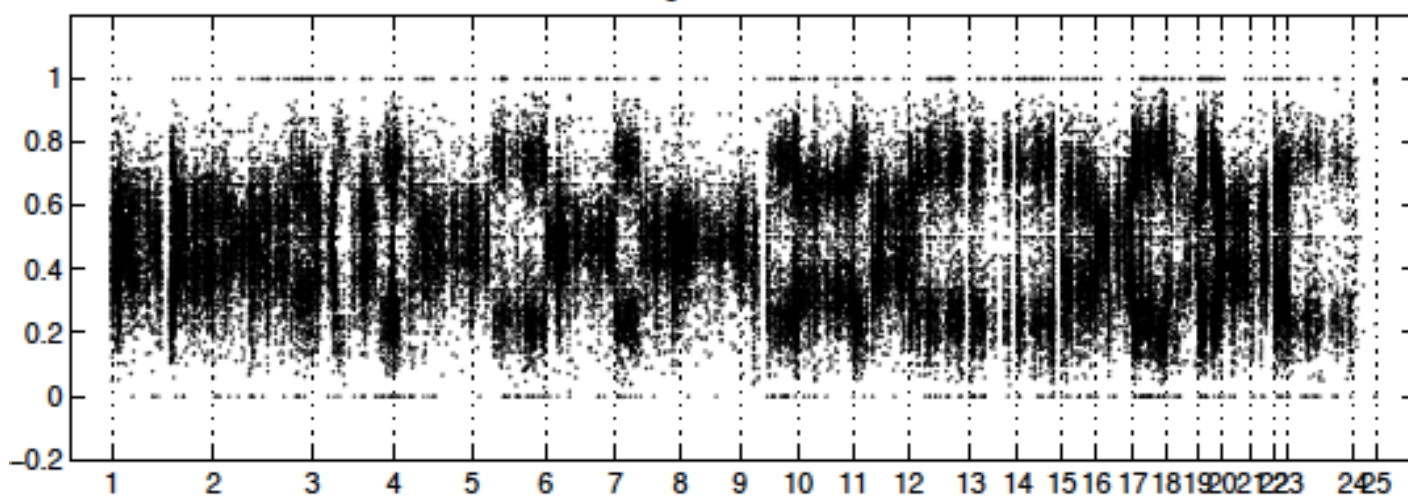

112\_ucsc.edu\_BRCA.IlluminaGA\_DNASeq.Level\_2.5.0.0\_TCGA-AN-A0XT\_D  
germline-het

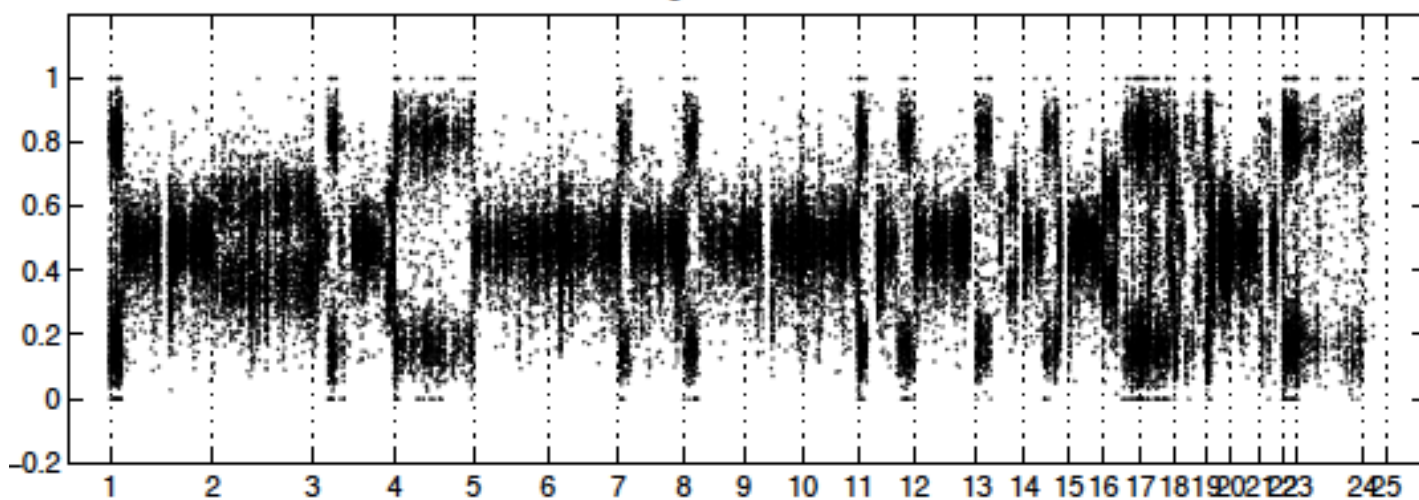

113\_ucsc.edu\_BRCA.IlluminaGA\_DNASeq.Level\_2.10.0.0\_TCGA-BH-A0BA\_W  
germline-het

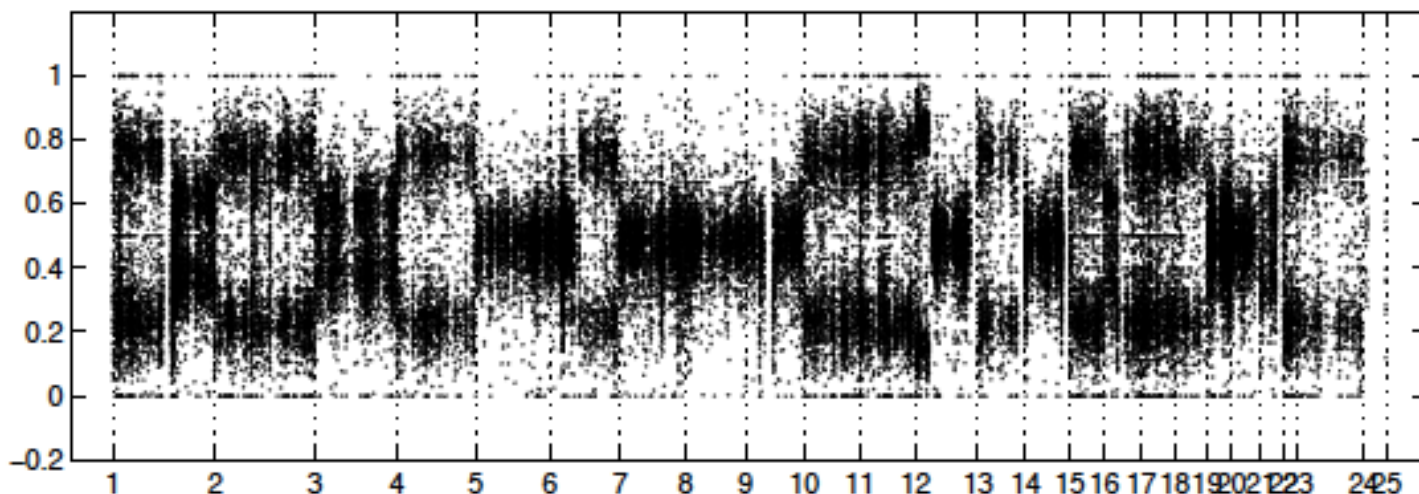

114\_ucsc.edu\_BRCA.IlluminaGA\_DNASeq.Level\_2.7.0.0\_TCGA-AQ-A04H\_D  
germline-het

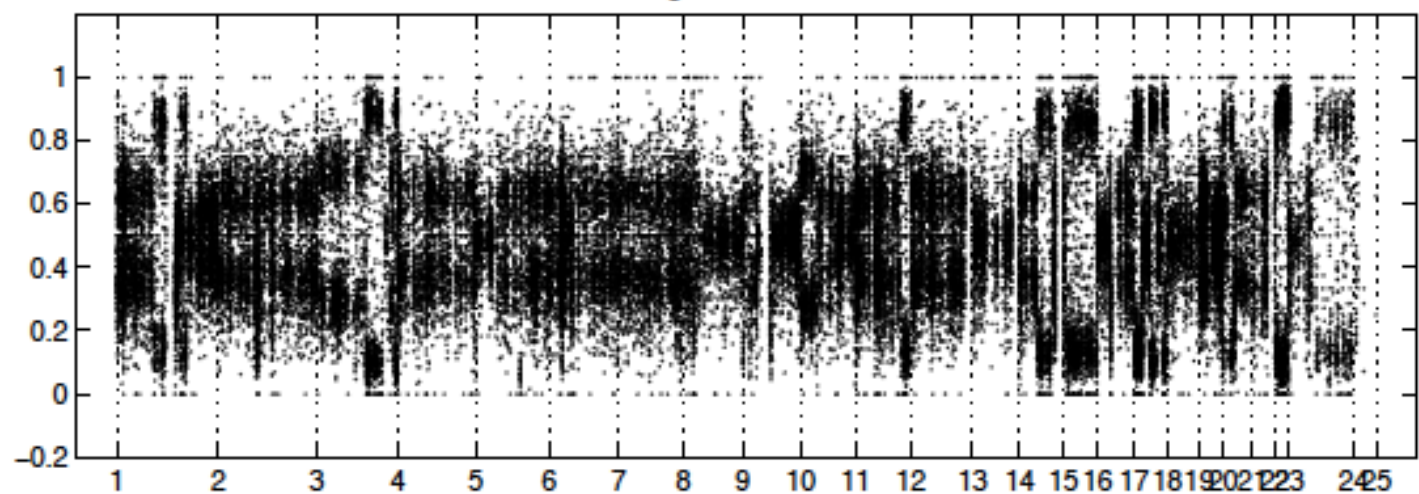

115\_ucsc.edu\_BRCA.IlluminaGA\_DNASeq.Level\_2.9.0.0\_TCGA-B6-A0WV\_D  
germline-het

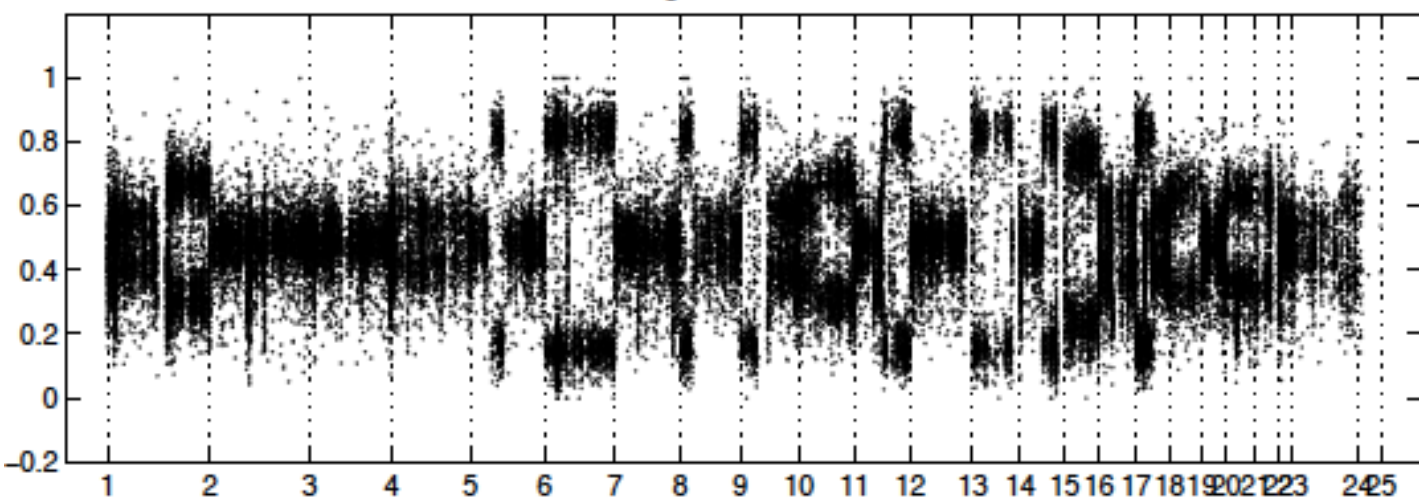



116\_ucsc.edu\_BRCA.IlluminaGA\_DNASeq.Level\_2.9.0.0\_TCGA-B6-A0IQ\_W  
germline-het

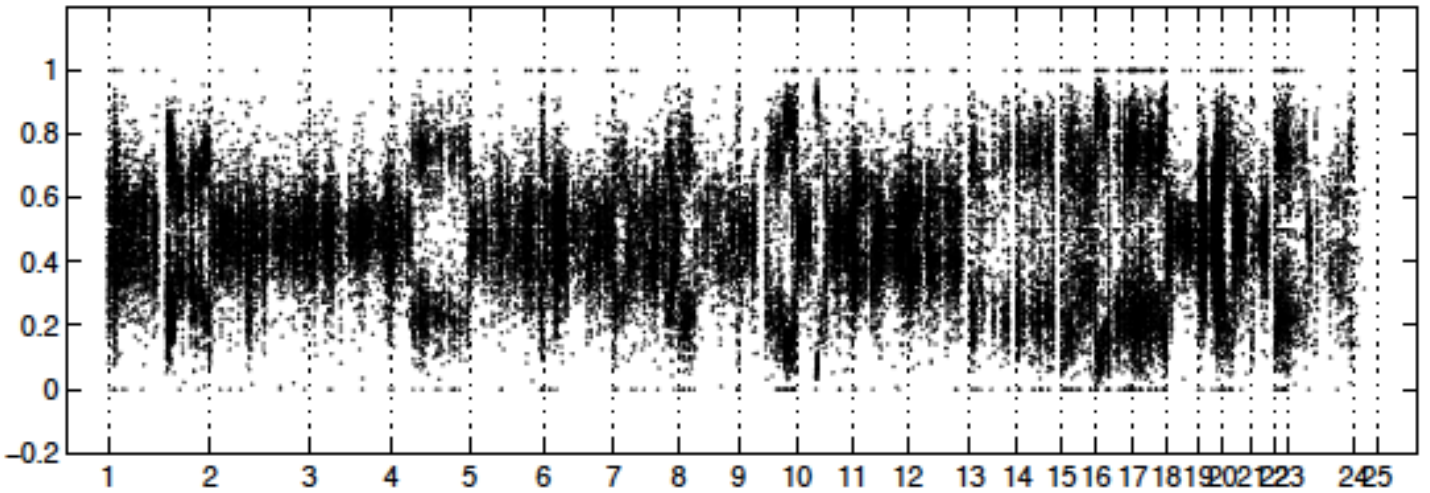

117\_ucsc.edu\_BRCA.IlluminaGA\_DNASeq.Level\_2.2.0.0\_TCGA-A2-A0CM\_W  
germline-het

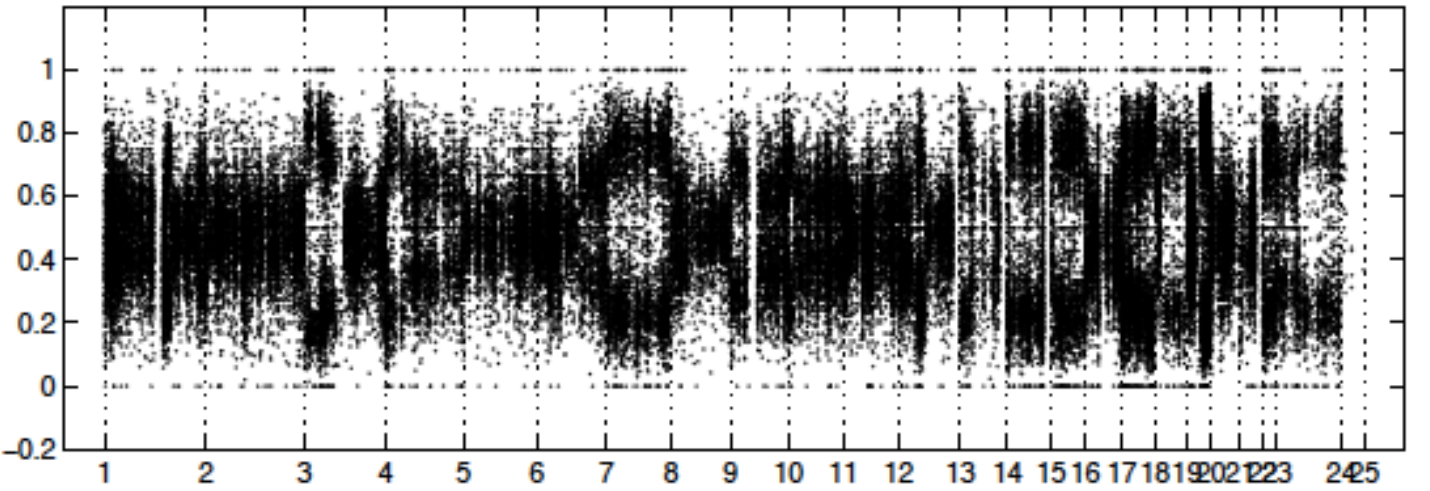

118\_ucsc.edu\_BRCA.IlluminaGA\_DNASeq.Level\_2.4.0.0\_TCGA-A8-A081\_W  
germline-het

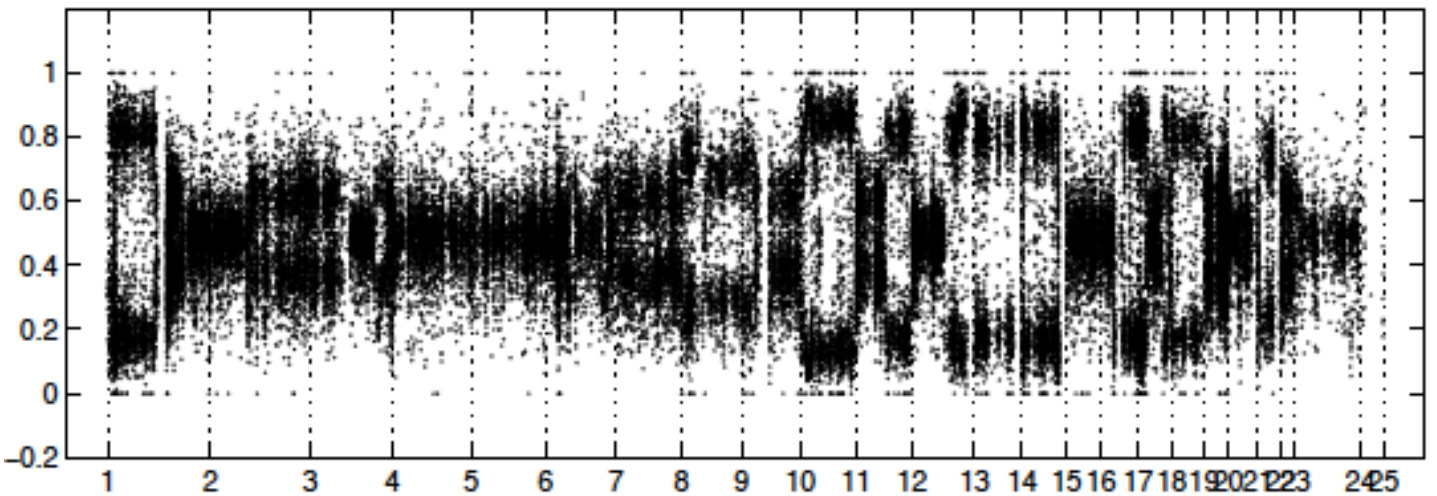

119\_ucsc.edu\_BRCA.IlluminaGA\_DNASeq.Level\_2.11.0.0\_TCGA-C8-A130\_D  
germline-het

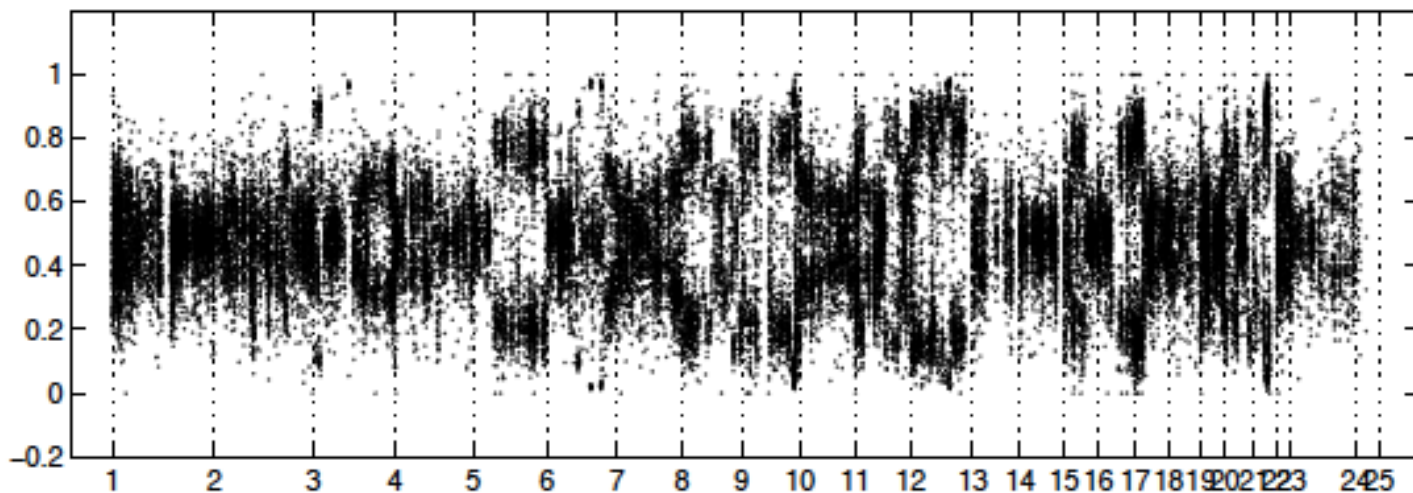

120\_ucsc.edu\_BRCA.IlluminaGA\_DNASeq.Level\_2.10.0.0\_TCGA-BH-A0B1\_W  
germline-het

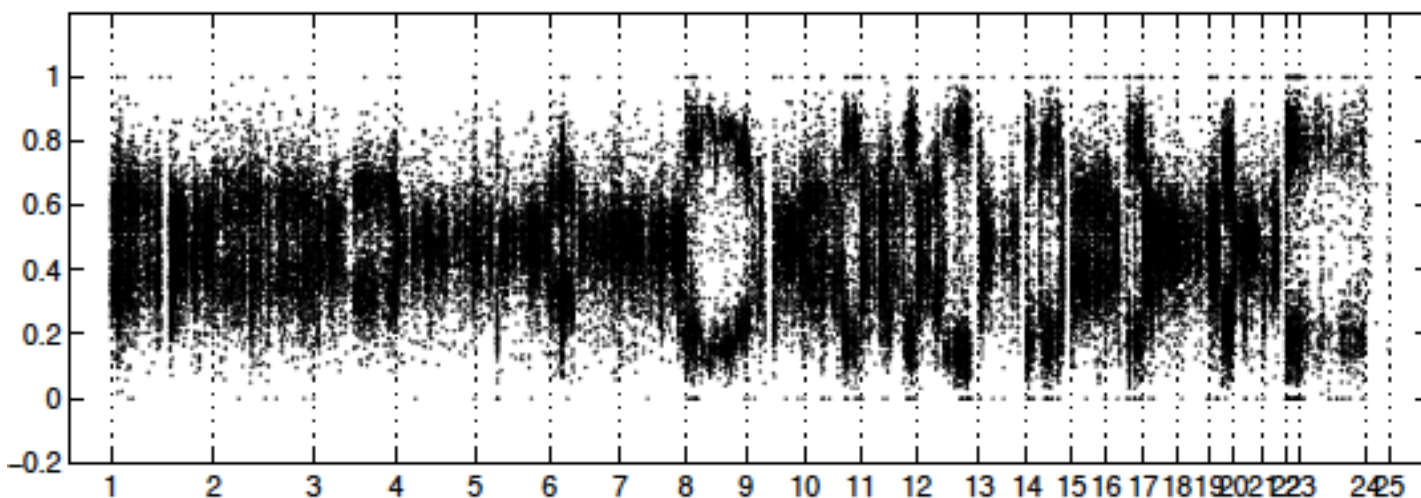

121\_ucsc.edu\_BRCA.IlluminaGA\_DNASeq.Level\_2.8.0.0\_TCGA-AR-A0TP\_D  
germline-het

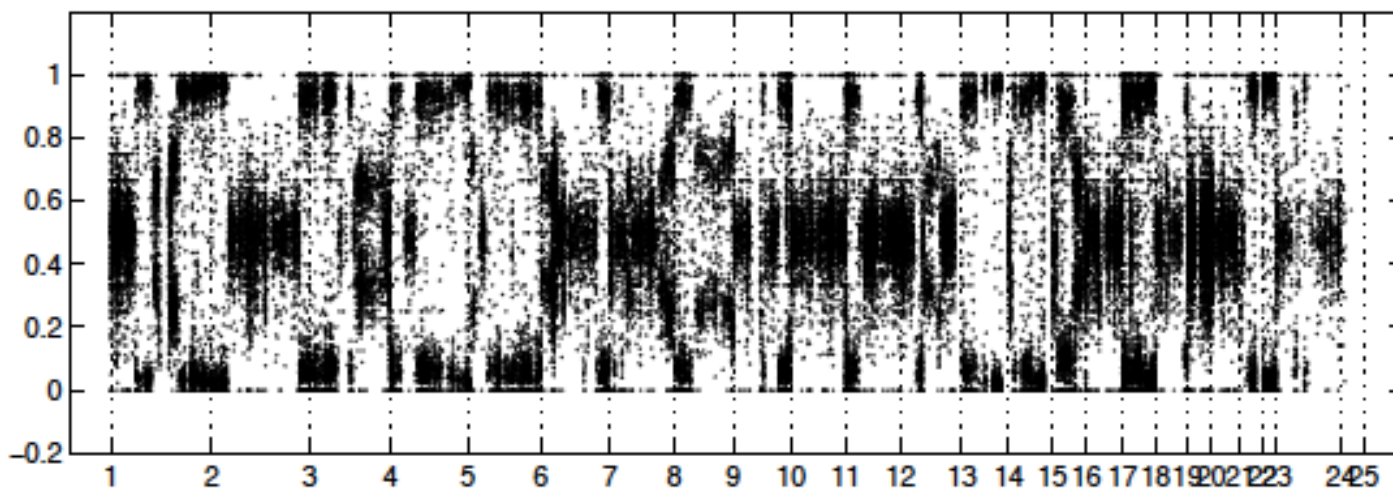

122\_ucsc.edu\_BRCA.IlluminaGA\_DNASeq.Level\_2.4.0.0\_TCGA-A8-A09C\_W  
germline-het

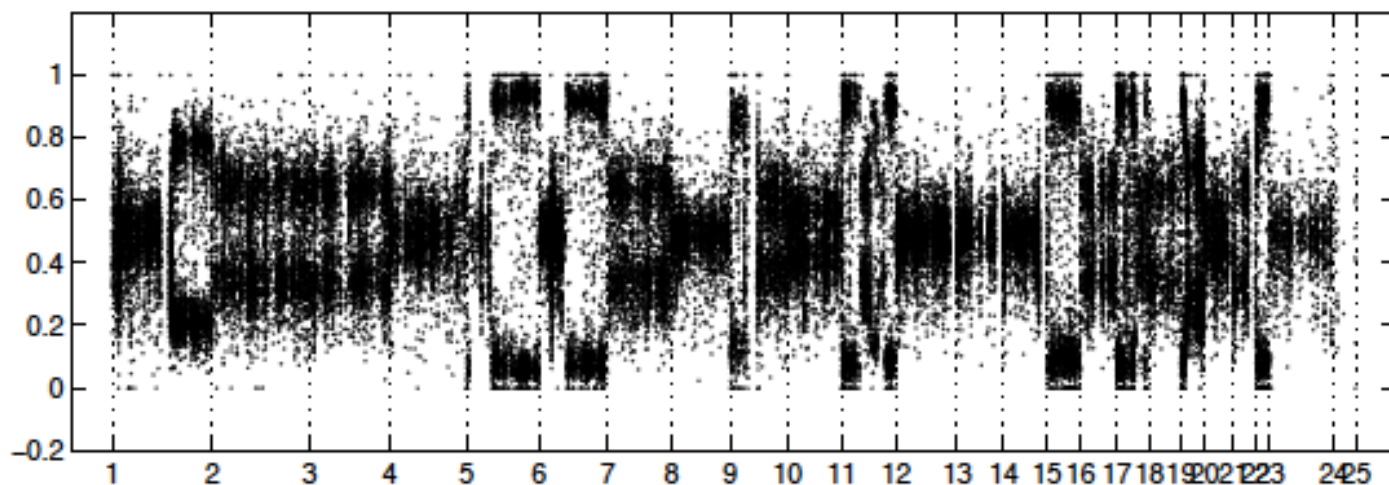

123\_ucsc.edu\_BRCA.IlluminaGA\_DNASeq.Level\_2.2.0.0\_TCGA-A2-A0D2\_W  
germline-het

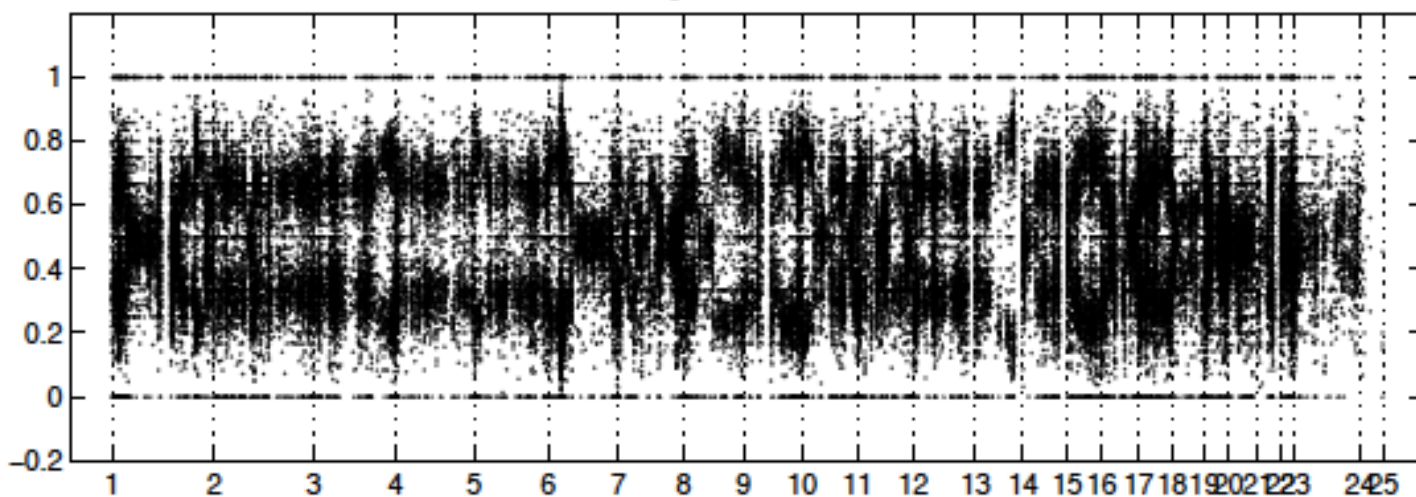

124\_ucsc.edu\_BRCA.IlluminaGA\_DNASeq.Level\_2.2.0.0\_TCGA-A2-A0D4\_W  
germline-het

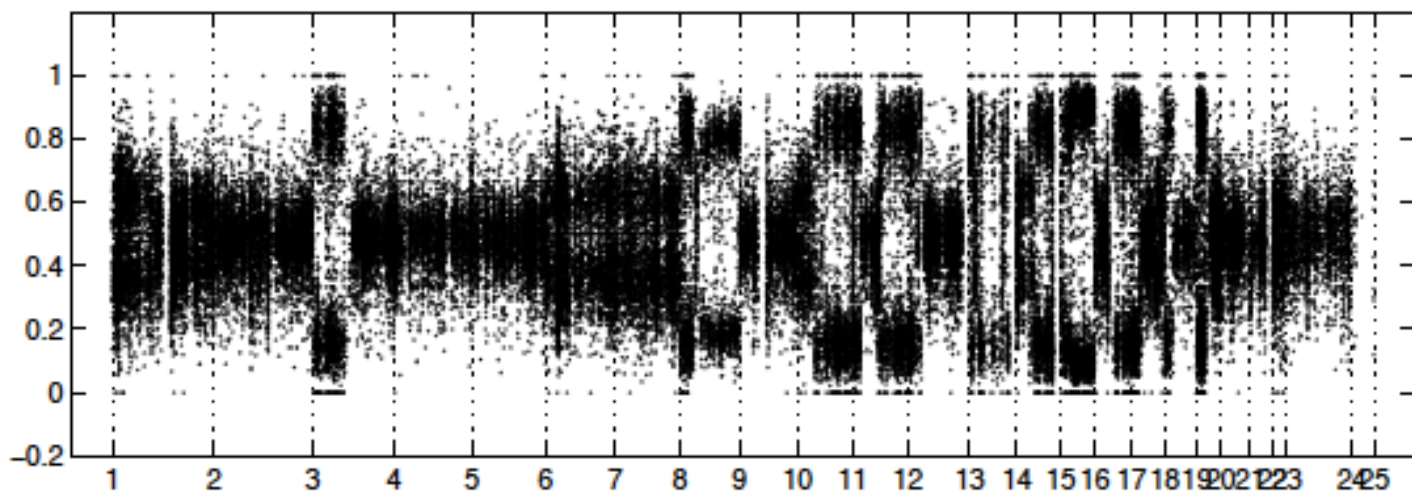

125\_ucsc.edu\_BRCA.IlluminaGA\_DNASeq.Level\_2.5.0.0\_TCGA-AN-A0FL\_W  
germline-het

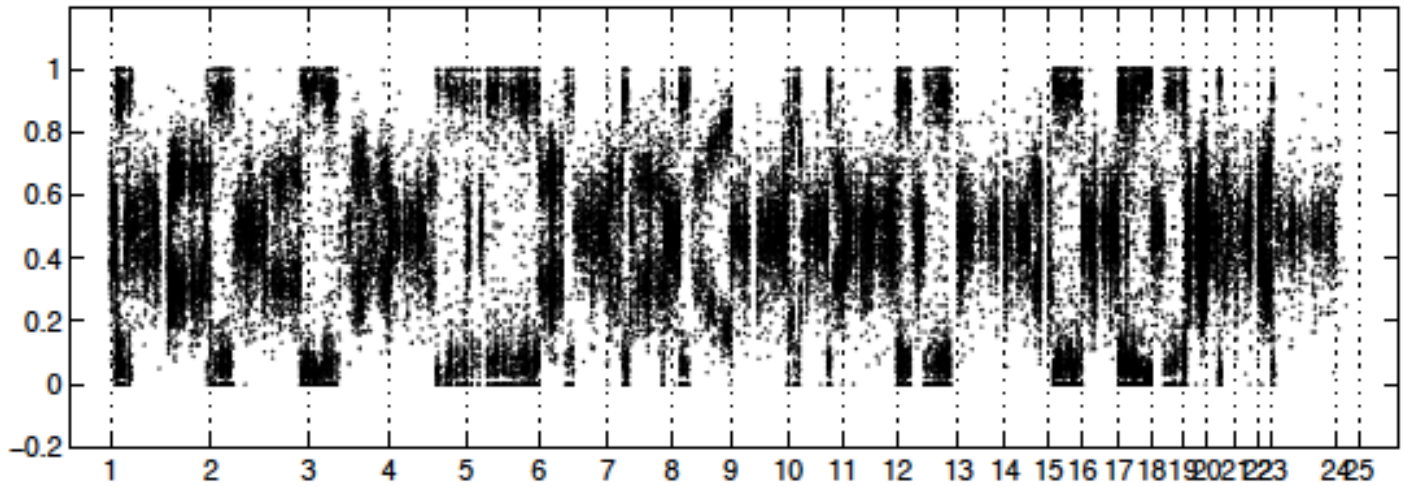

126\_ucsc.edu\_BRCA.IlluminaGA\_DNASeq.Level\_2.4.0.0\_TCGA-A8-A08B\_W  
germline-het

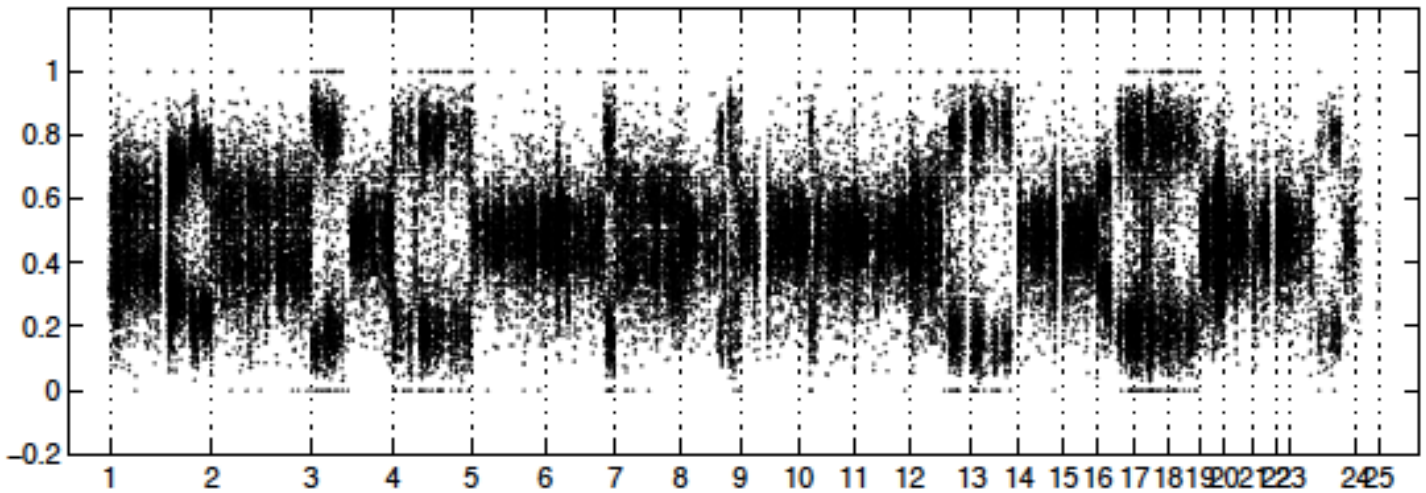

127\_ucsc.edu\_BRCA.IlluminaGA\_DNASeq.Level\_2.14.0.0\_TCGA-AR-A0TY\_W  
germline-het

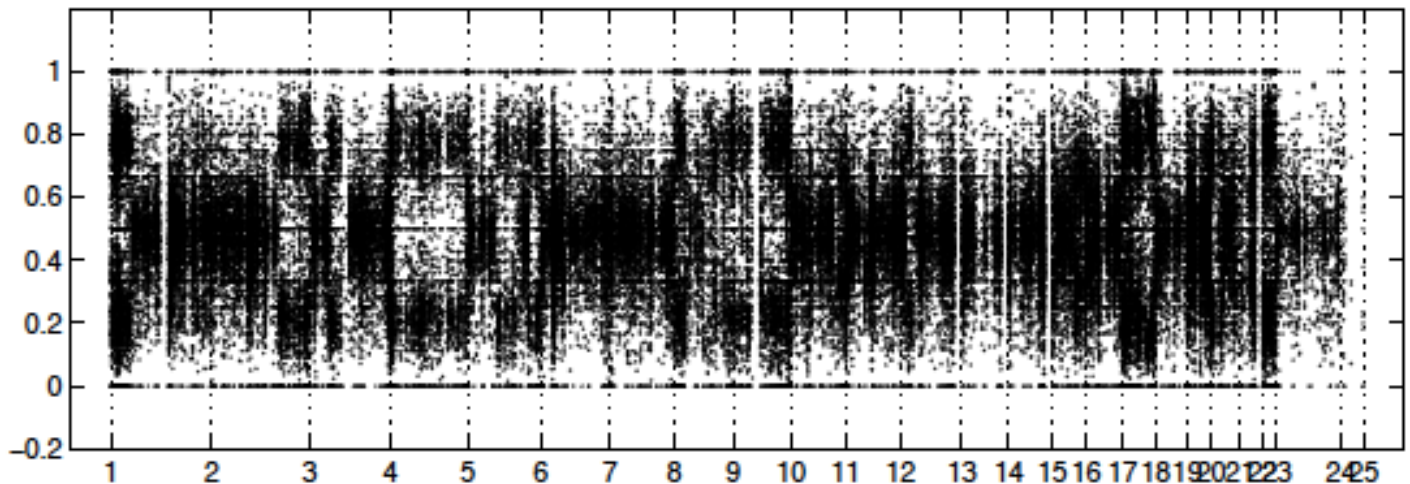

128\_ucsc.edu\_BRCA.IlluminaGA\_DNASeq.Level\_2.5.0.0\_TCGA-AN-A0FV\_W  
germline-het

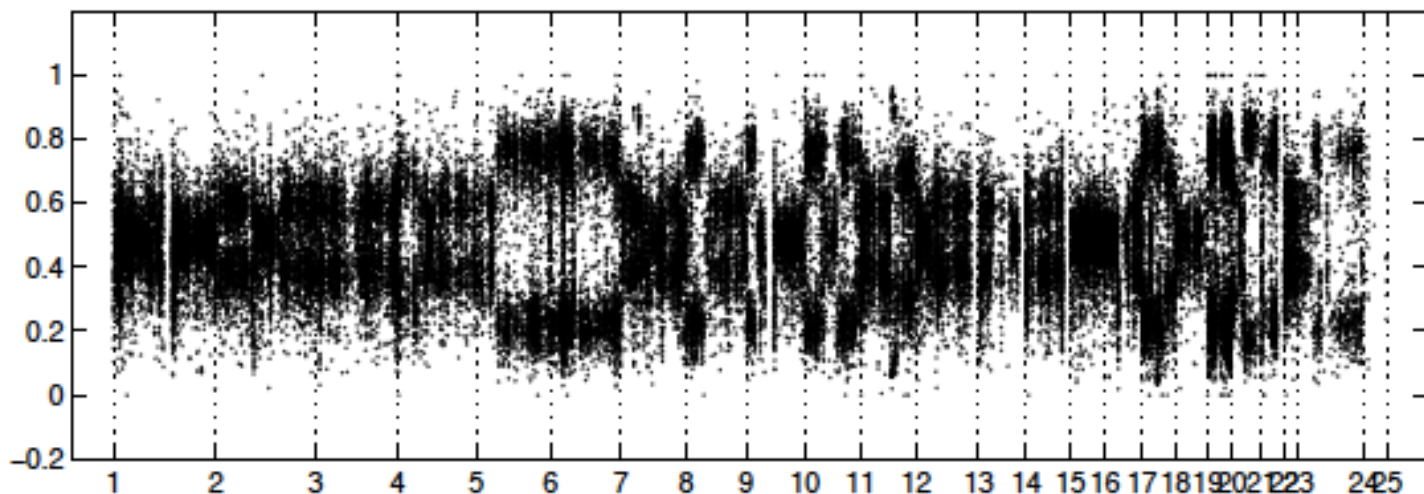

129\_ucsc.edu\_BRCA.IlluminaGA\_DNASeq.Level\_2.4.0.0\_TCGA-A8-A06X\_W  
germline-het

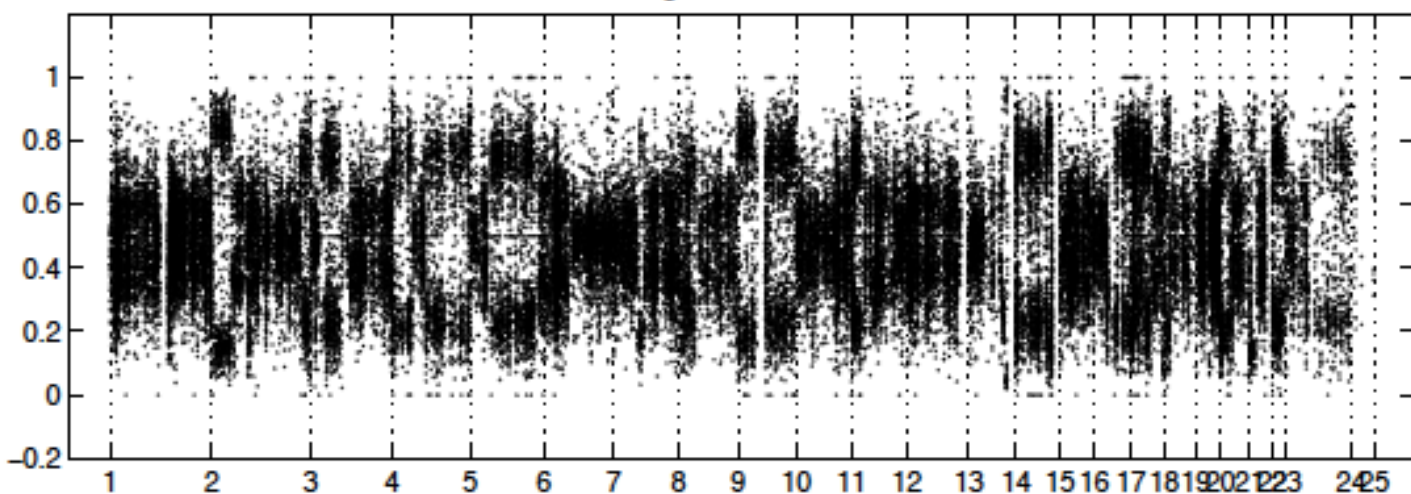

130\_ucsc.edu\_BRCA.IlluminaGA\_DNASeq.Level\_2.4.0.0\_TCGA-A8-A09K\_W  
germline-het

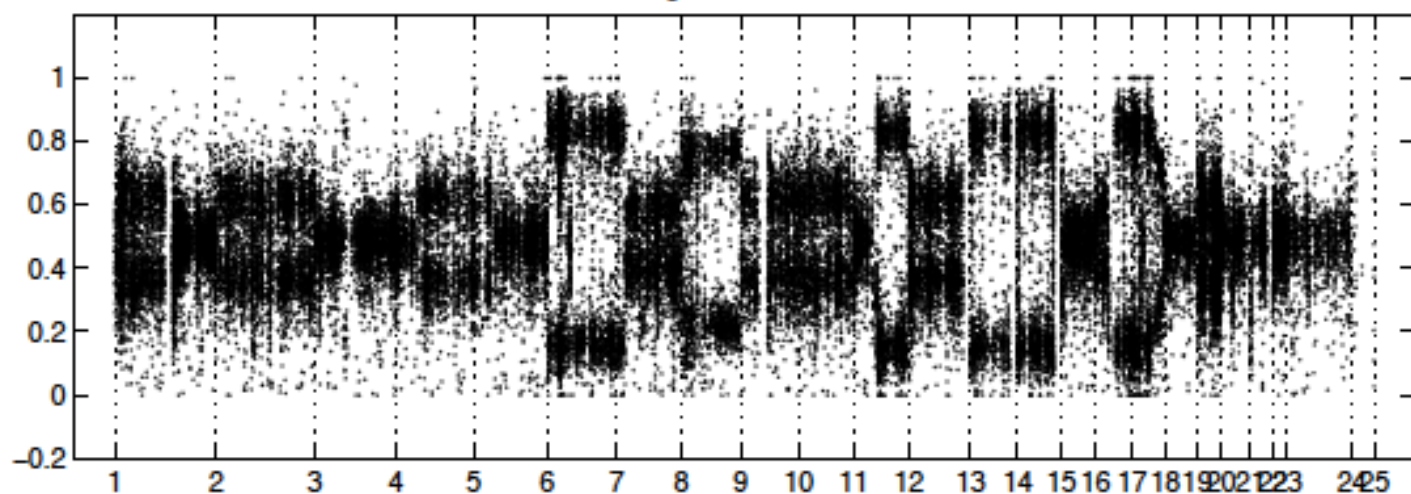

131\_ucsc.edu\_BRCA.IlluminaGA\_DNASeq.Level\_2.9.0.0\_TCGA-B6-A0IG\_W  
germline-het

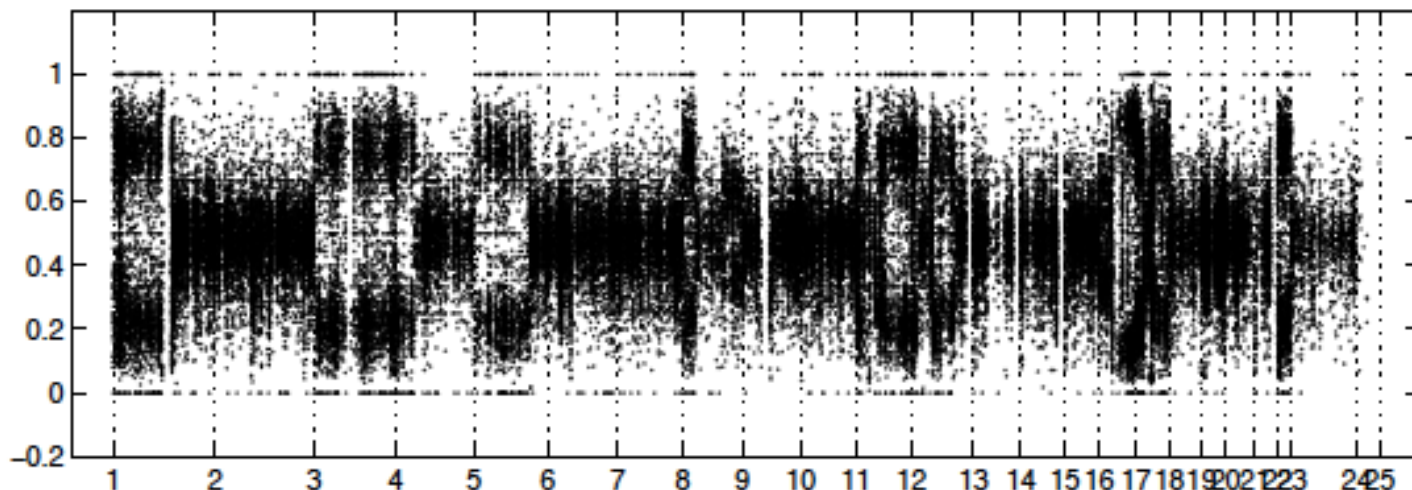

132\_ucsc.edu\_BRCA.IlluminaGA\_DNASeq.Level\_2.11.0.0\_TCGA-C8-A1HN\_D  
germline-het

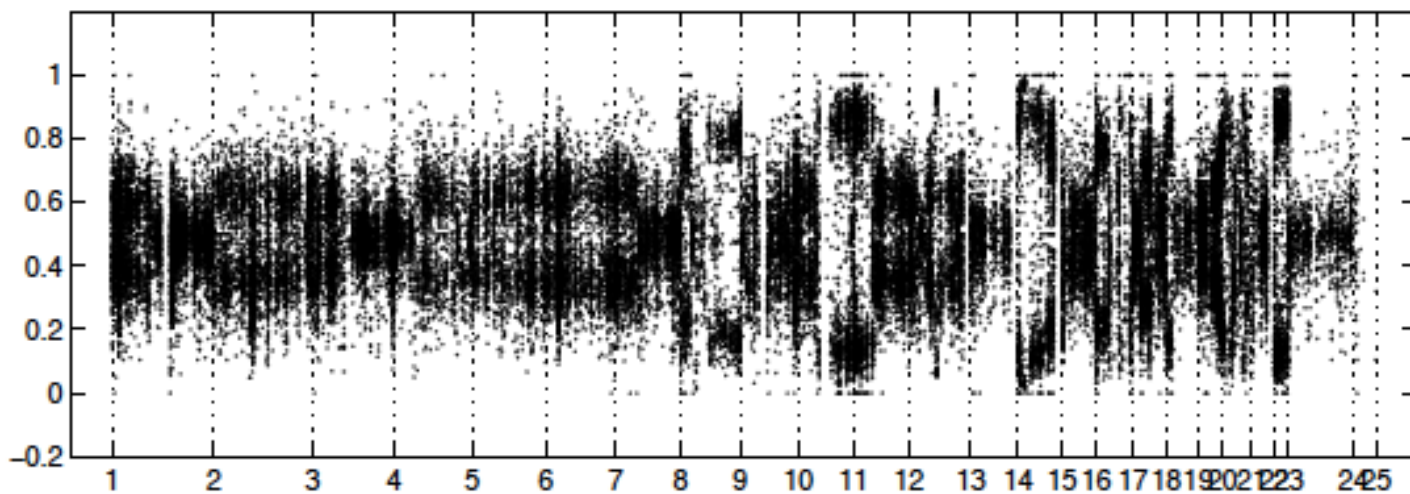

133\_ucsc.edu\_BRCA.IlluminaGA\_DNASeq.Level\_2.2.0.0\_TCGA-A2-A0CW\_D  
germline-het

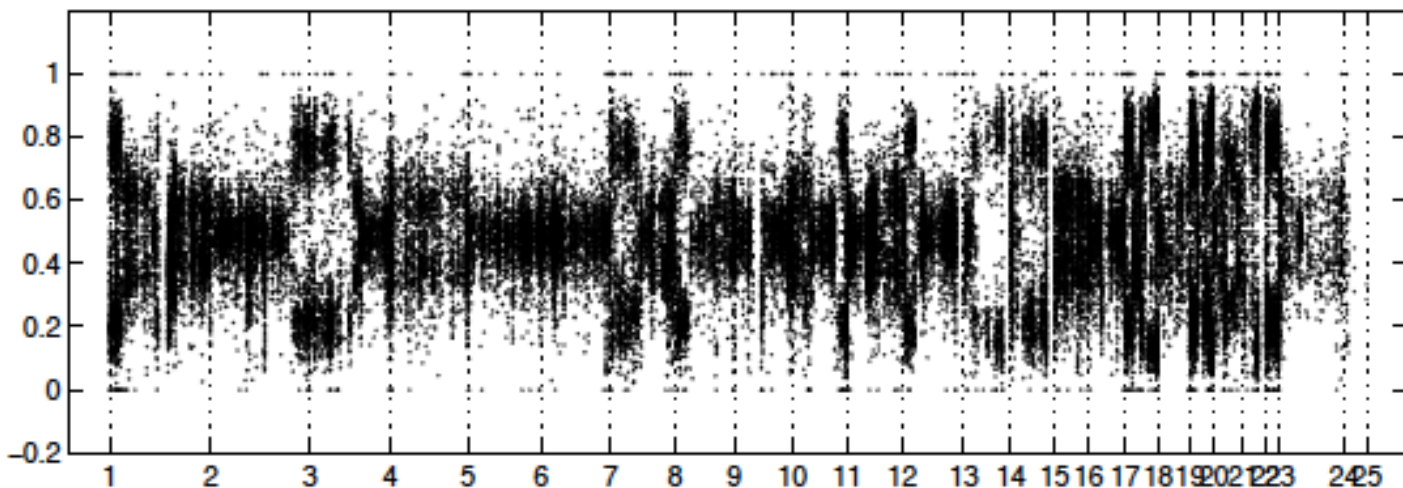

134\_ucsc.edu\_BRCA.IlluminaGA\_DNASeq.Level\_2.4.0.0\_TCGA-A8-A0A9\_W  
germline-het

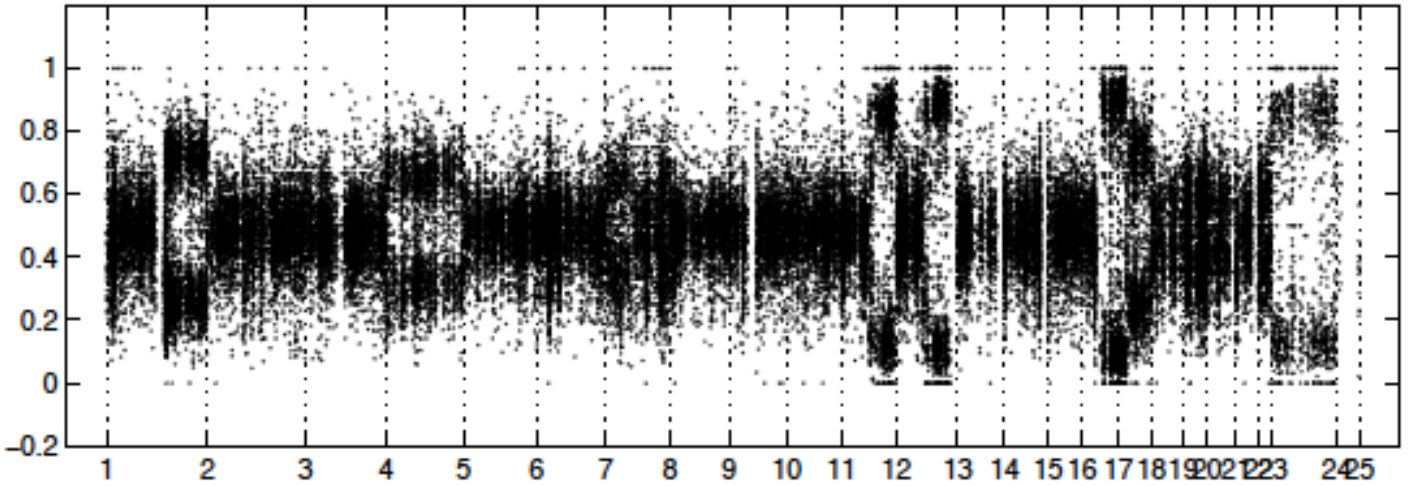

135\_ucsc.edu\_BRCA.IlluminaGA\_DNASeq.Level\_2.13.0.0\_TCGA-E2-A158\_D  
germline-het

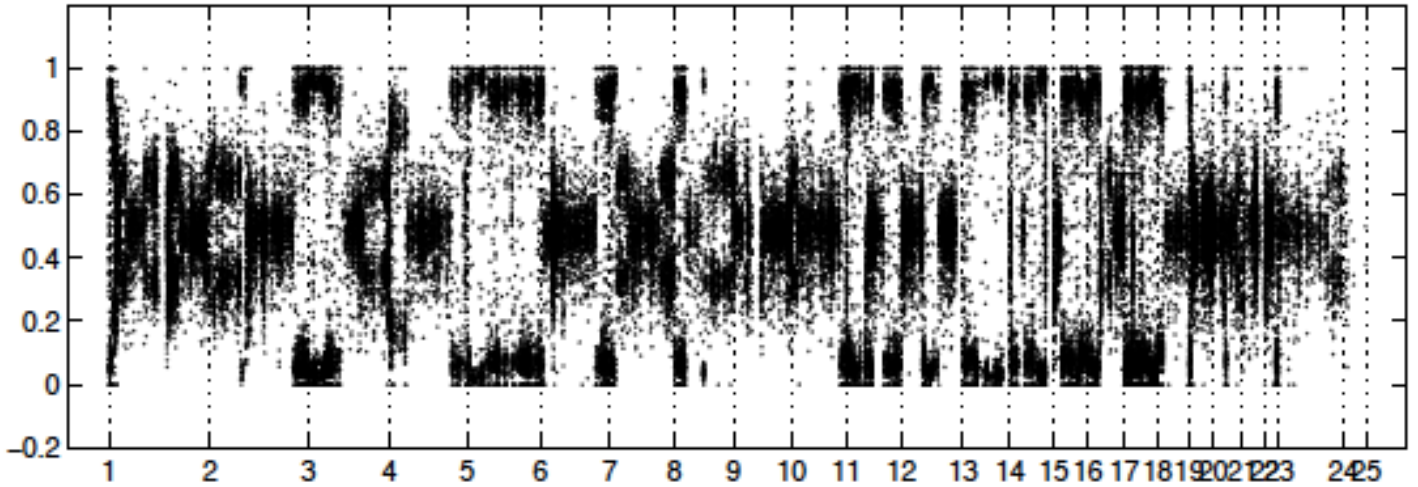

136\_ucsc.edu\_BRCA.IlluminaGA\_DNASeq.Level\_2.8.0.0\_TCGA-AR-A1A1\_D  
germline-het

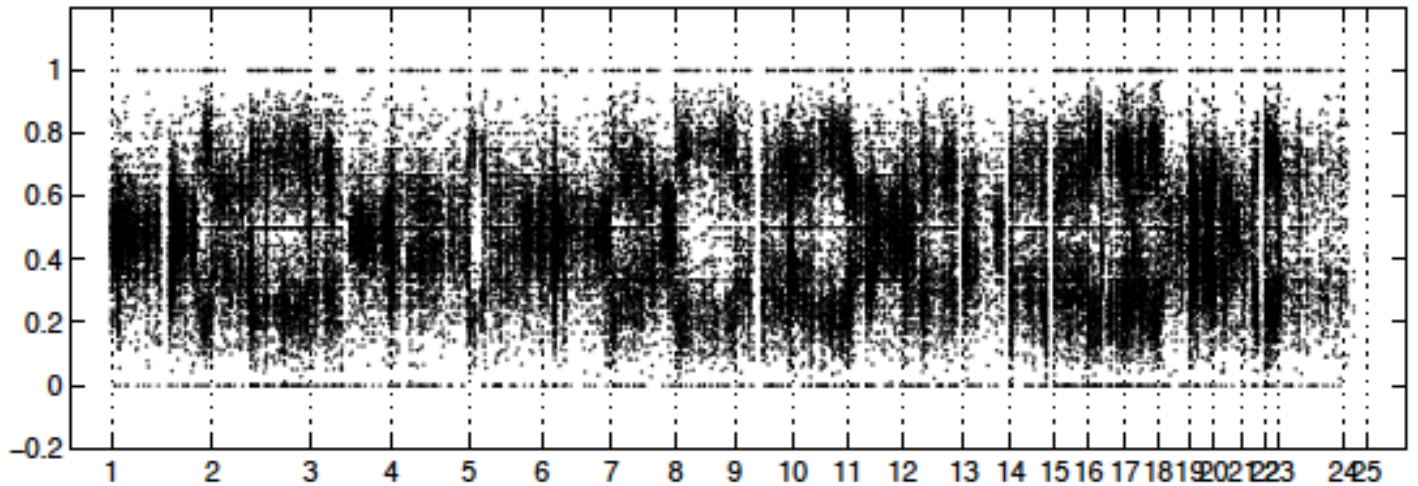

137\_ucsc.edu\_BRCA.IlluminaGA\_DNASeq.Level\_2.9.0.0\_TCGA-B6-A0RU\_D  
germline-het

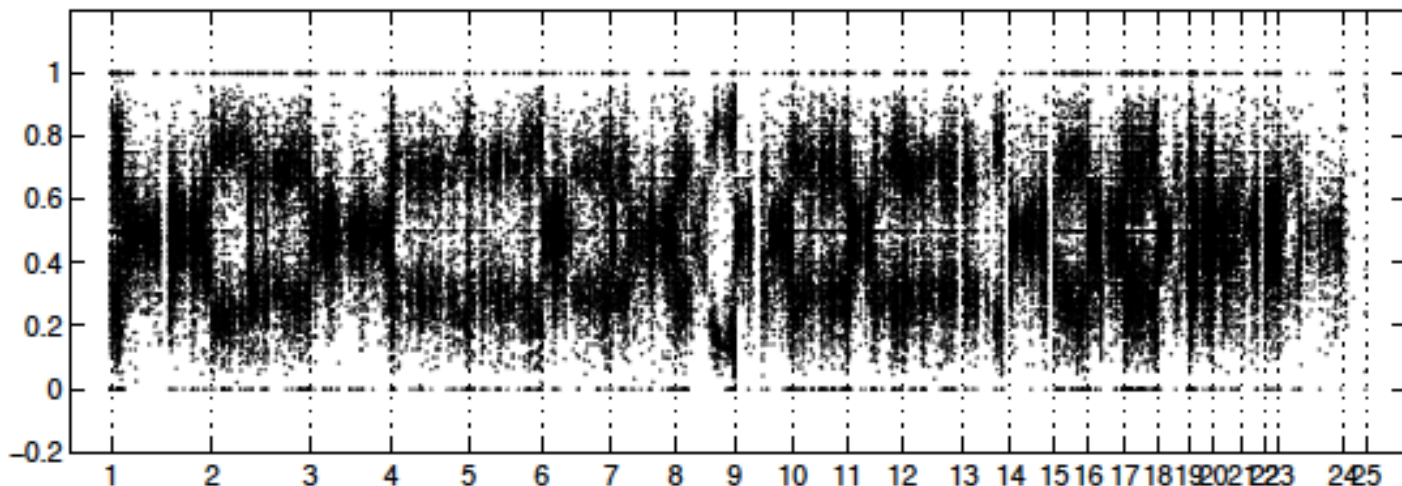

138\_ucsc.edu\_BRCA.IlluminaGA\_DNASeq.Level\_2.8.0.0\_TCGA-AR-A0TZ\_D  
germline-het

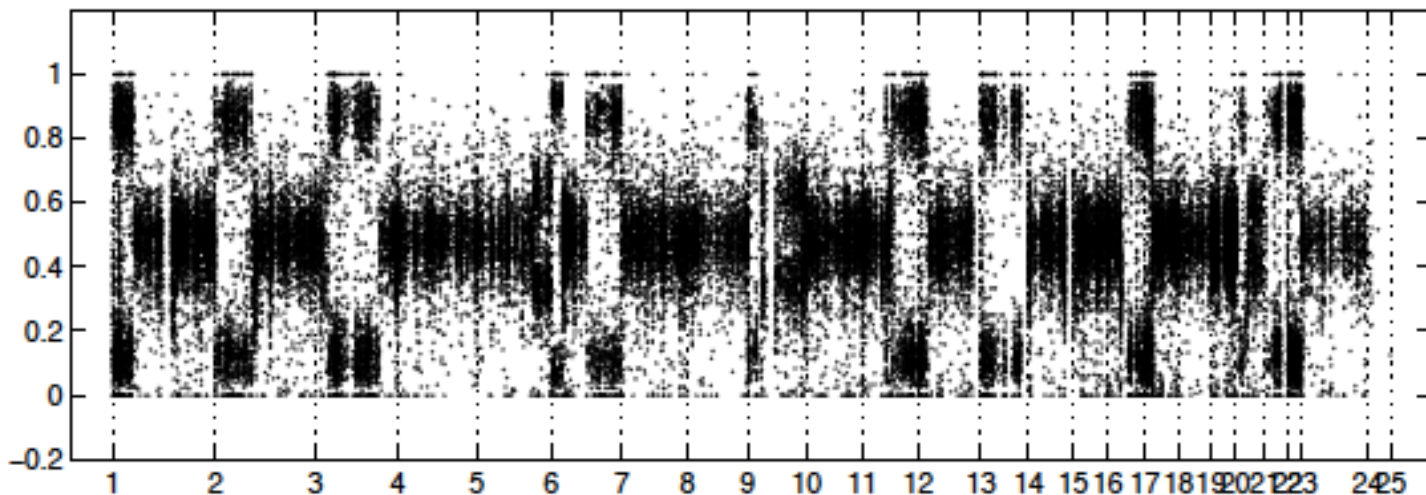

139\_ucsc.edu\_BRCA.IlluminaGA\_DNASeq.Level\_2.8.0.0\_TCGA-AR-A0TV\_D  
germline-het

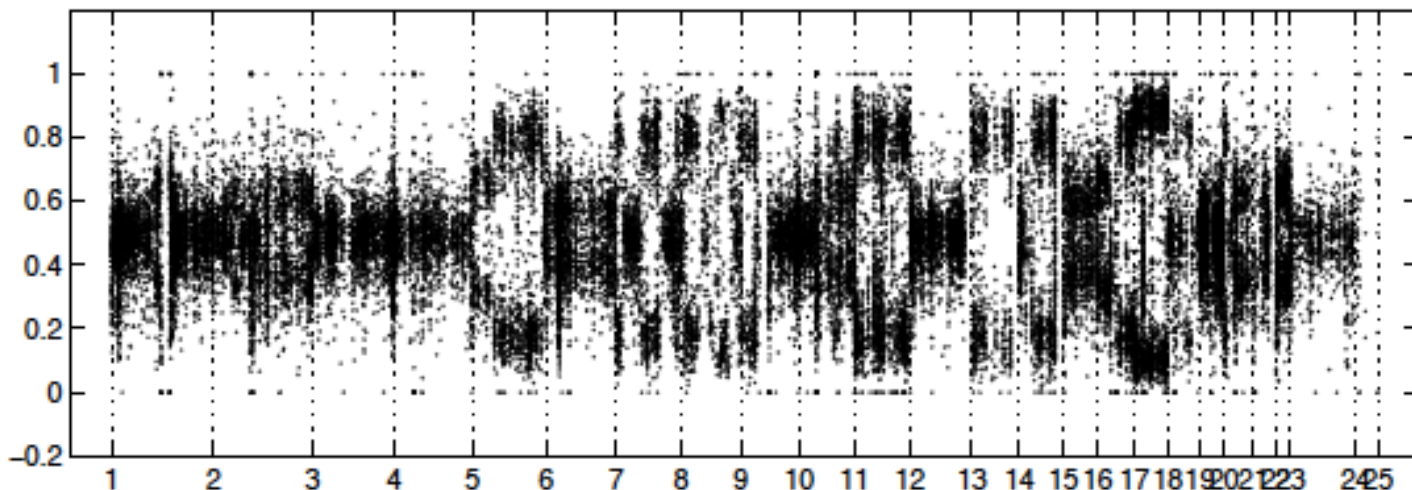



140\_ucsc.edu\_BRCA.IlluminaGA\_DNASeq.Level\_2.9.0.0\_TCGA-B6-A01O\_W  
germline-het

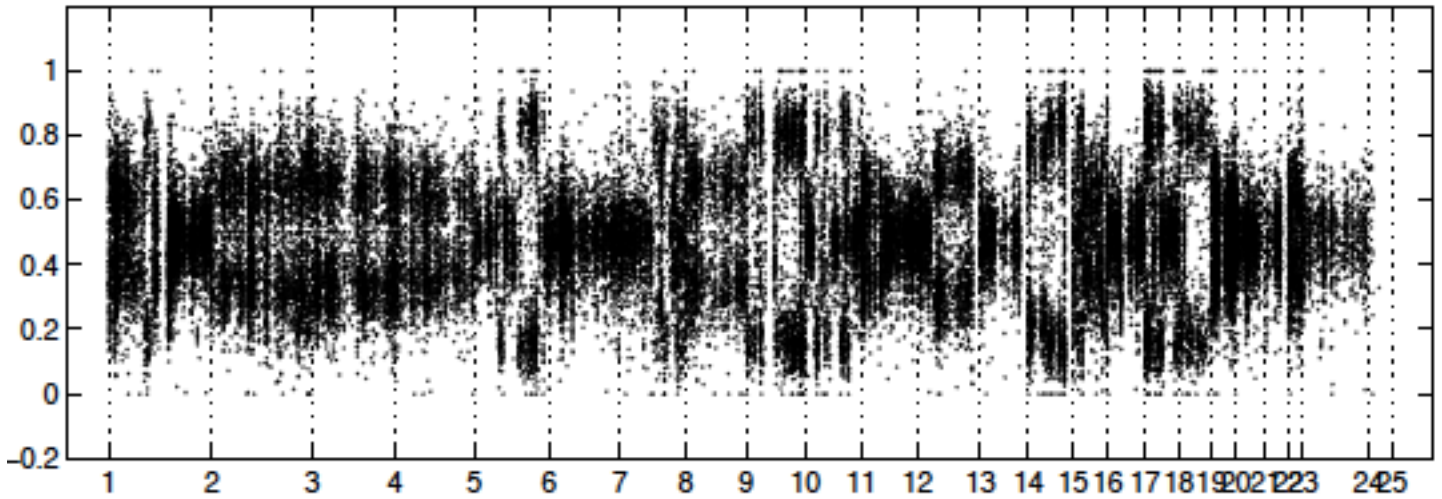

141\_ucsc.edu\_BRCA.IlluminaGA\_DNASeq.Level\_2.9.0.0\_TCGA-B6-A01B\_W  
germline-het

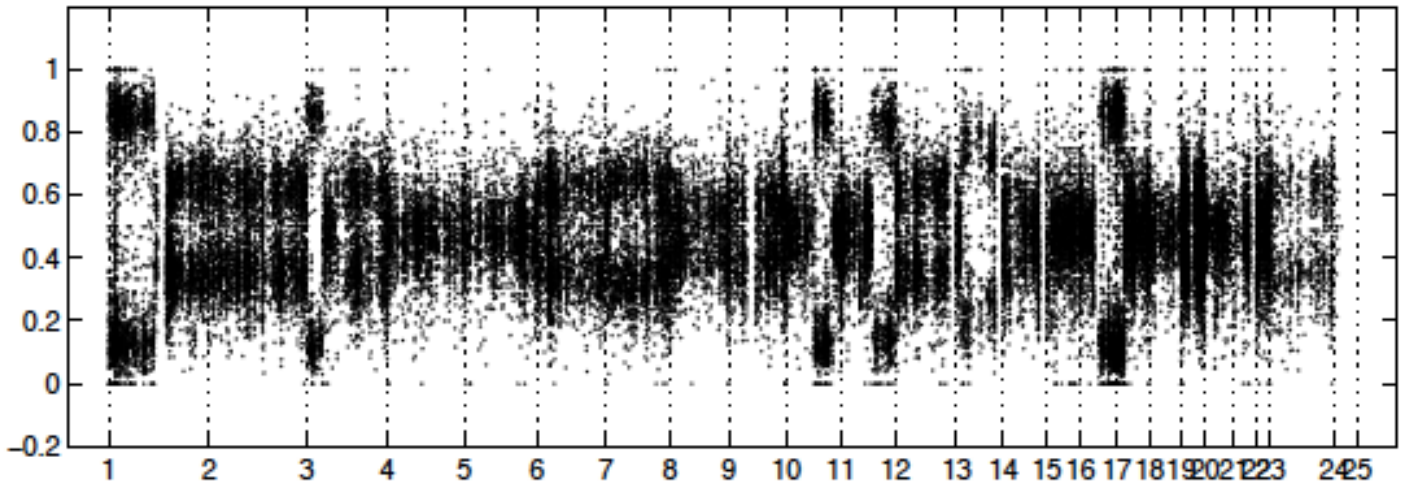

142\_ucsc.edu\_BRCA.IlluminaGA\_DNASeq.Level\_2.4.0.0\_TCGA-A8-A07B\_W  
germline-het

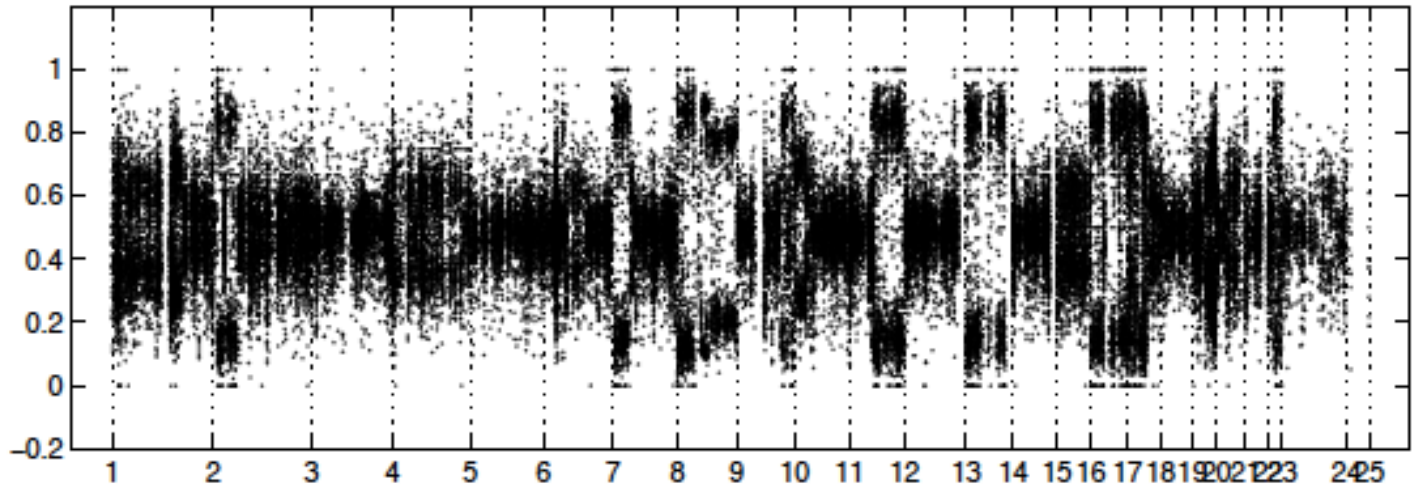

143\_ucsc.edu\_BRCA.IlluminaGA\_DNASeq.Level\_2.9.0.0\_TCGA-B6-A0IJ\_W  
germline-het

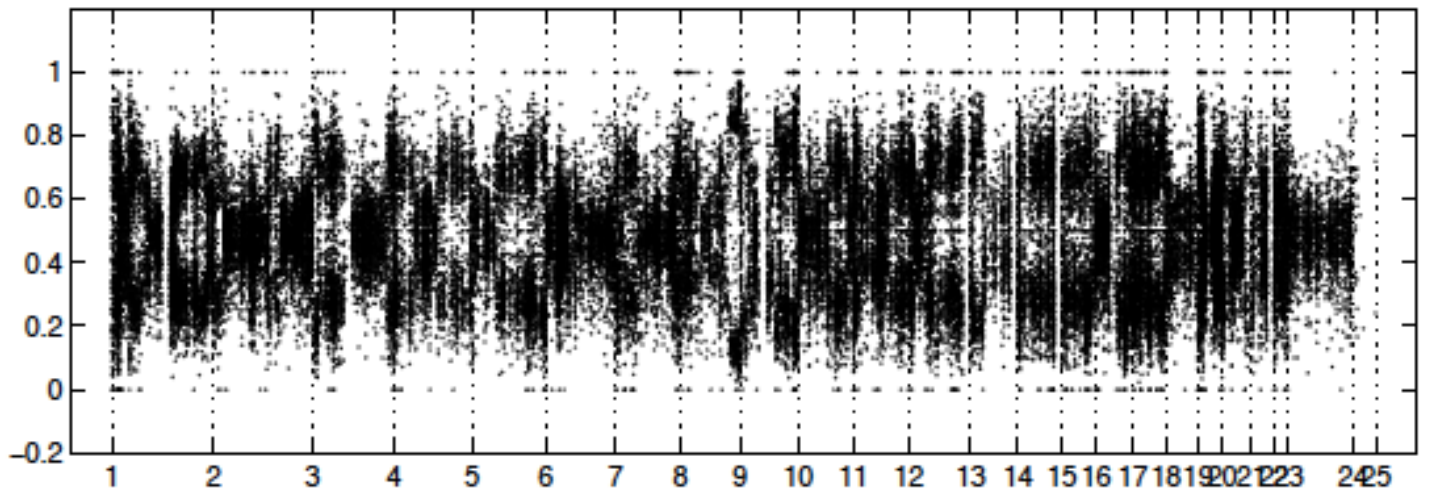

144\_ucsc.edu\_BRCA.IlluminaGA\_DNASeq.Level\_2.10.0.0\_TCGA-BH-A0B8\_W  
germline-het

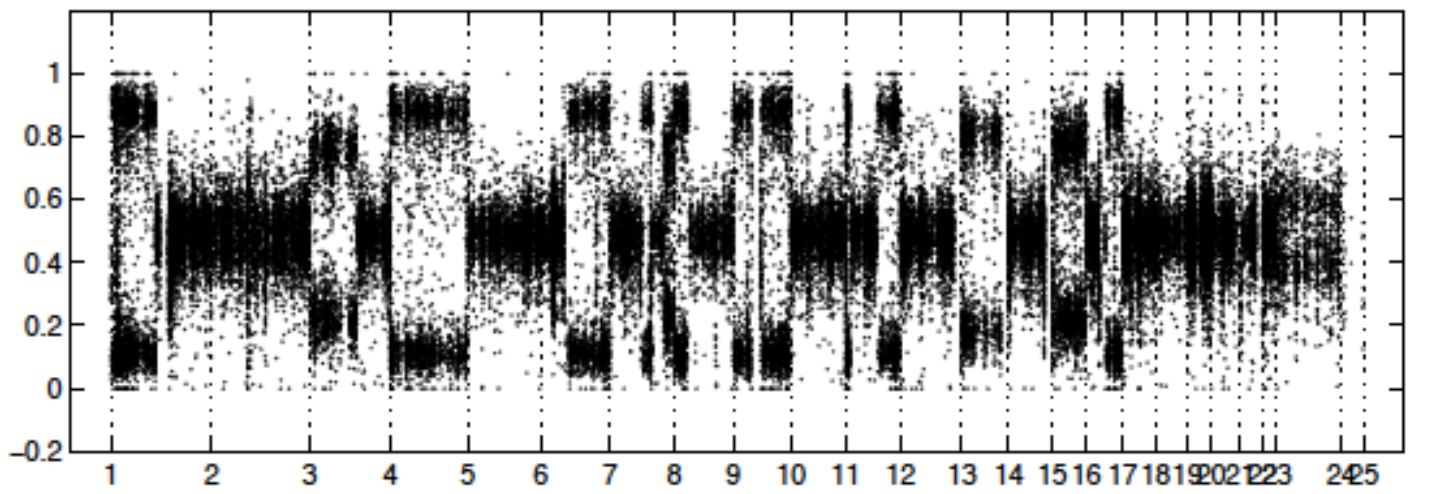

145\_ucsc.edu\_BRCA.IlluminaGA\_DNASeq.Level\_2.10.0.0\_TCGA-BH-A0HN\_D  
germline-het

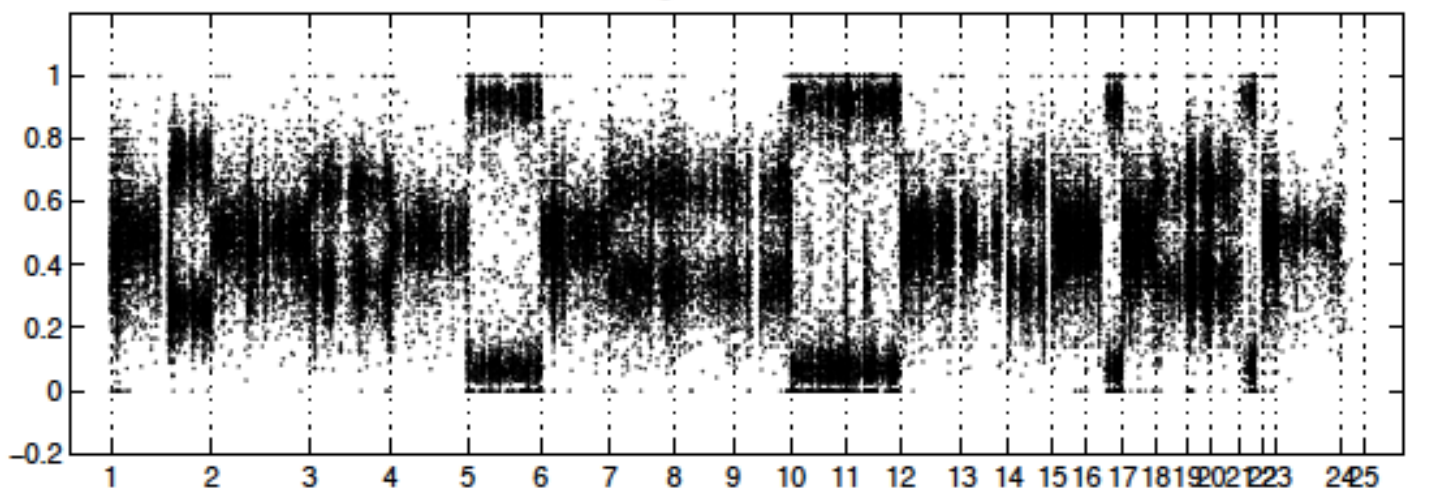

146\_ucsc.edu\_BRCA.IlluminaGA\_DNASeq.Level\_2.4.0.0\_TCGA-A8-A06Q\_W  
germline-het

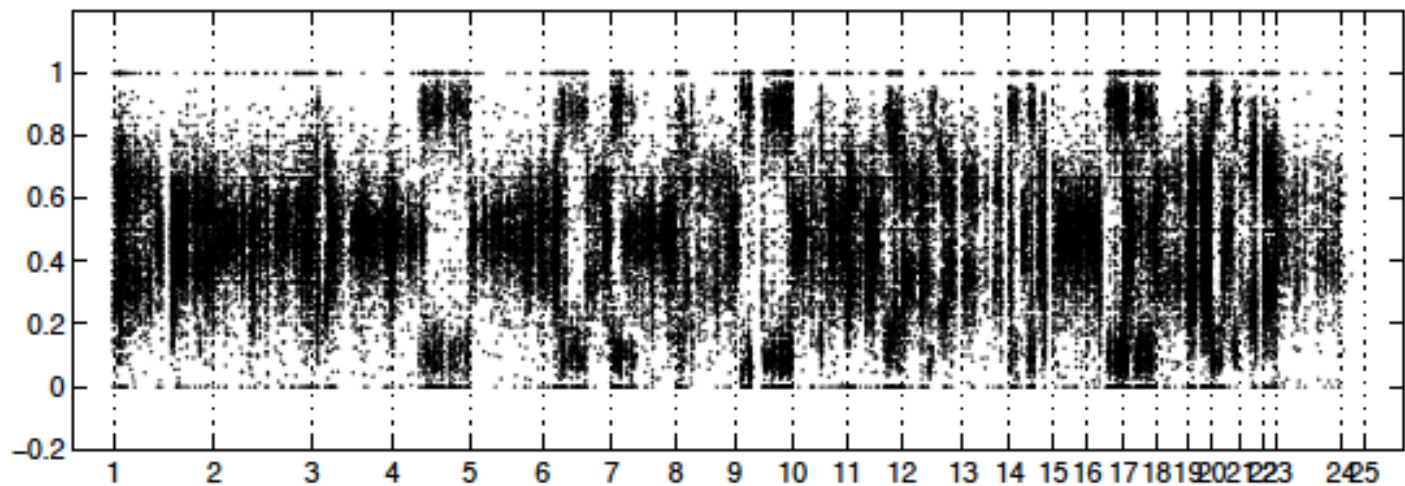

147\_ucsc.edu\_BRCA.IlluminaGA\_DNASeq.Level\_2.10.0.0\_TCGA-BH-A0AV\_D  
germline-het

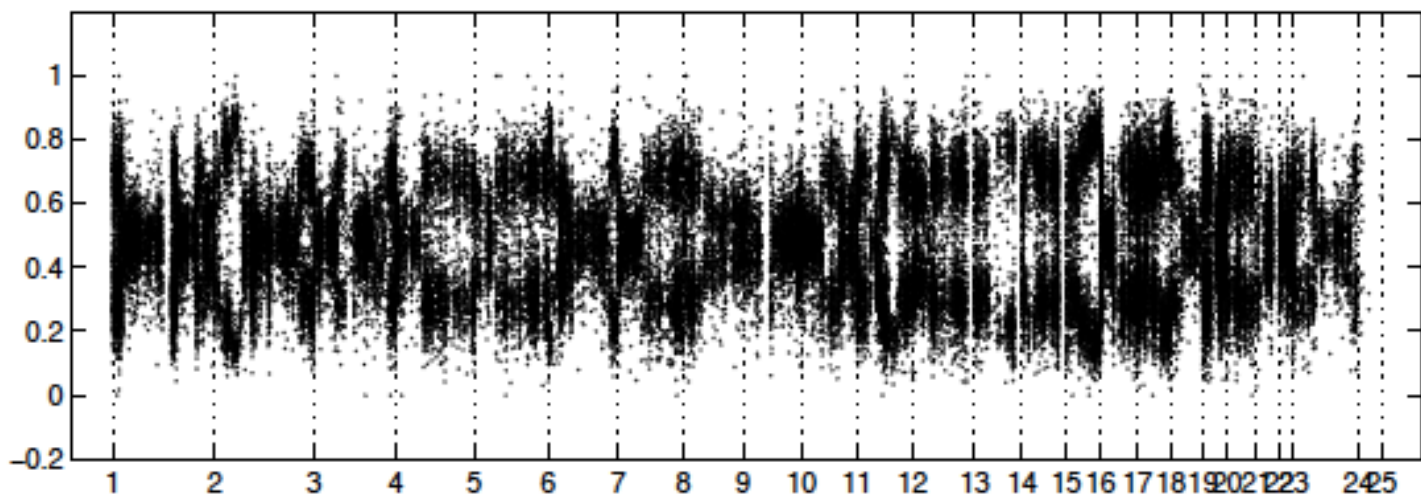

148\_ucsc.edu\_BRCA.IlluminaGA\_DNASeq.Level\_2.2.0.0\_TCGA-A2-A0D1\_W  
germline-het

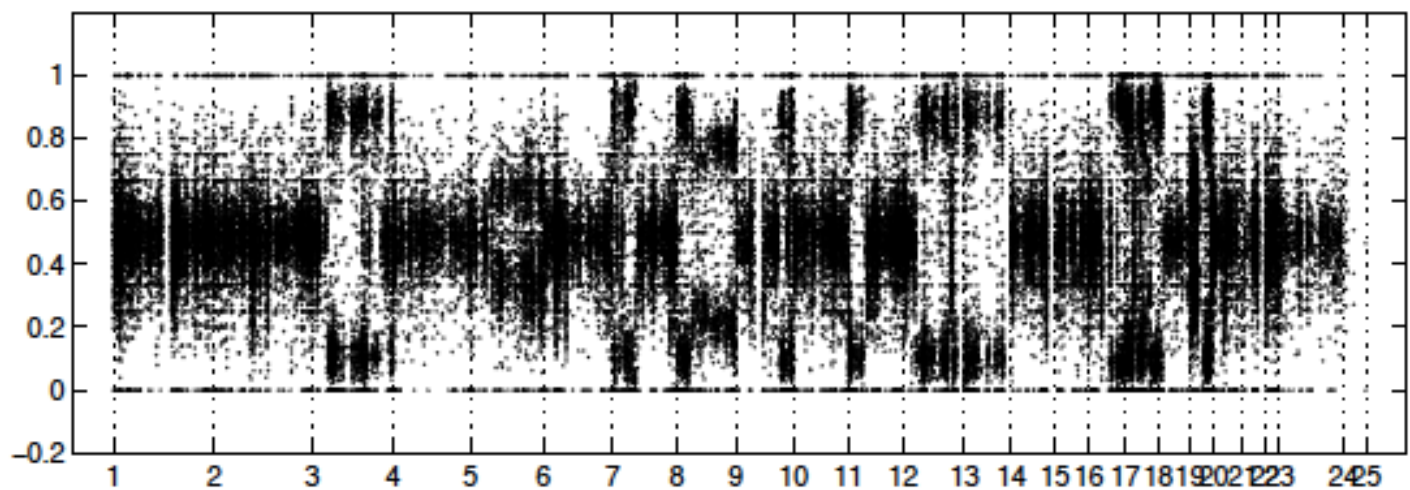

149\_ucsc.edu\_BRCA.IlluminaGA\_DNASeq.Level\_2.13.0.0\_TCGA-E2-A15S\_D  
germline-het

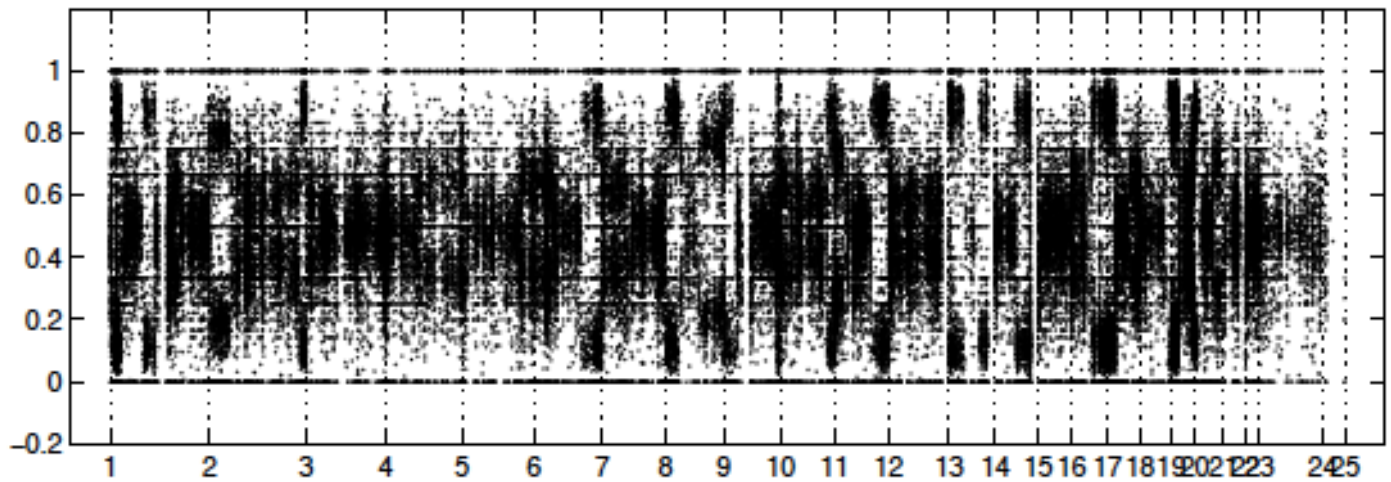

150\_ucsc.edu\_BRCA.IlluminaGA\_DNASeq.Level\_2.4.0.0\_TCGA-A8-A06N\_W  
germline-het

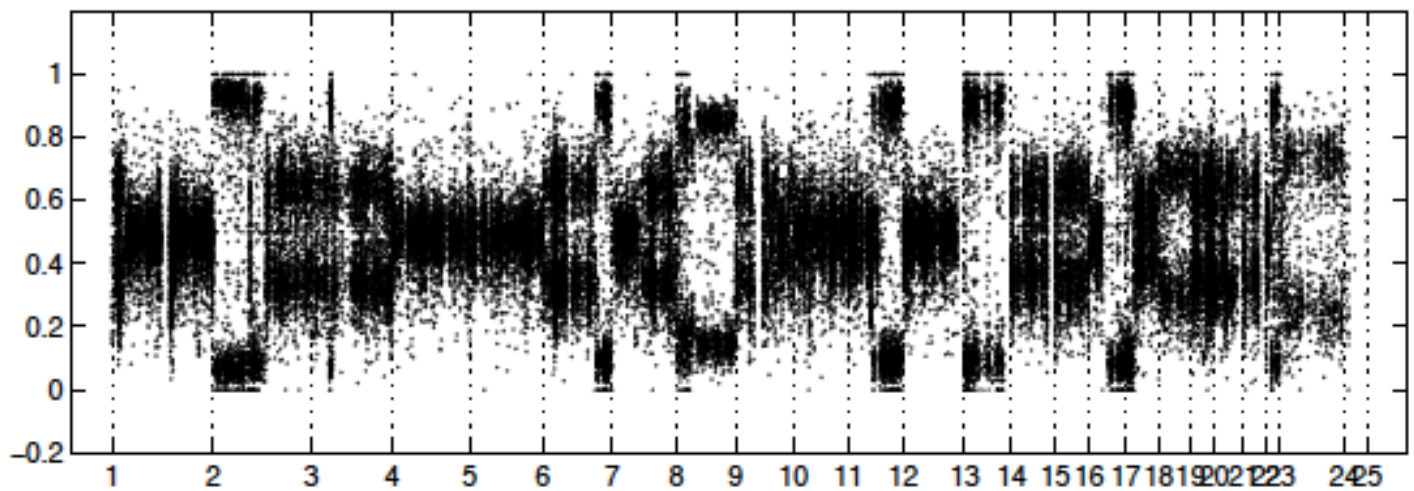

151\_ucsc.edu\_BRCA.IlluminaGA\_DNASeq.Level\_2.13.0.0\_TCGA-E2-A1B0\_D  
germline-het

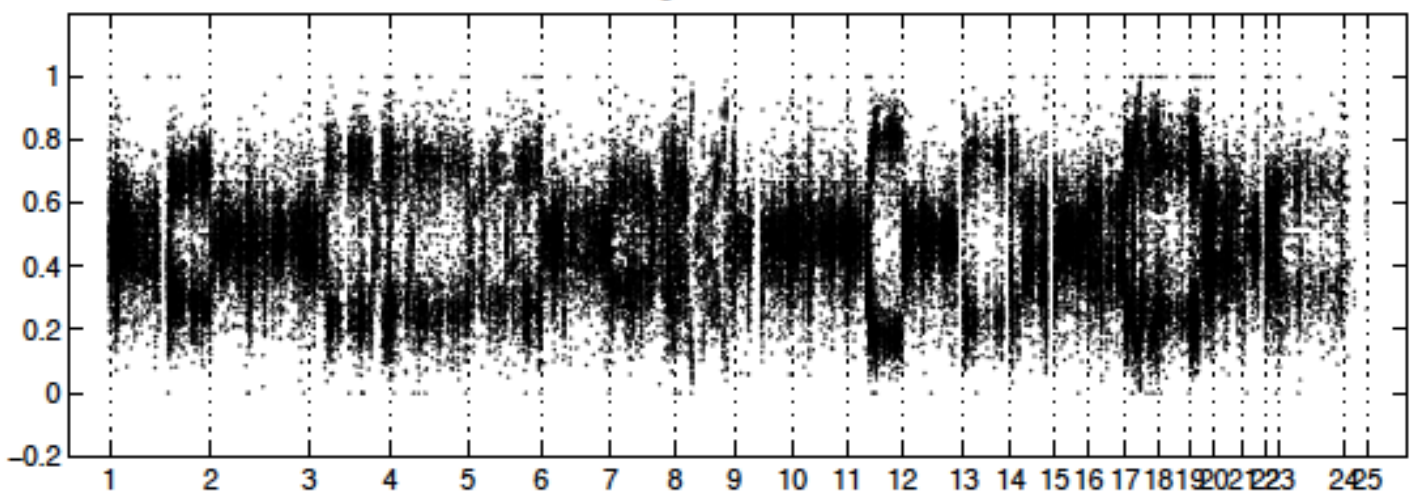

152\_ucsc.edu\_BRCA.IlluminaGA\_DNASeq.Level\_2.5.0.0\_TCGA-AN-A0XN\_D  
germline-het

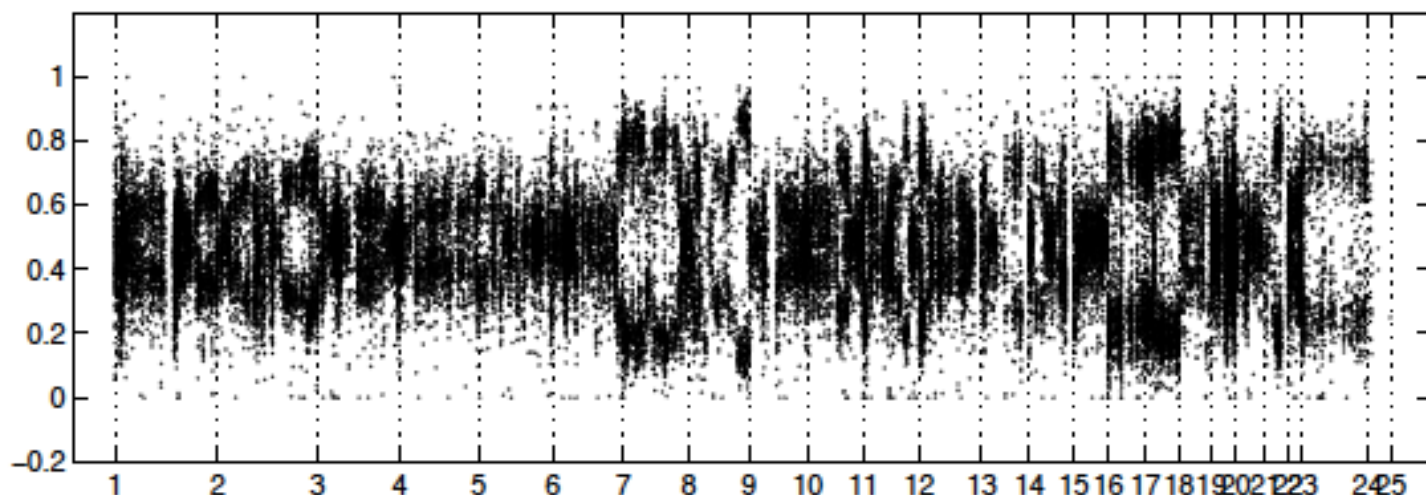

153\_ucsc.edu\_BRCA.IlluminaGA\_DNASeq.Level\_2.4.0.0\_TCGA-A8-A09E\_W  
germline-het

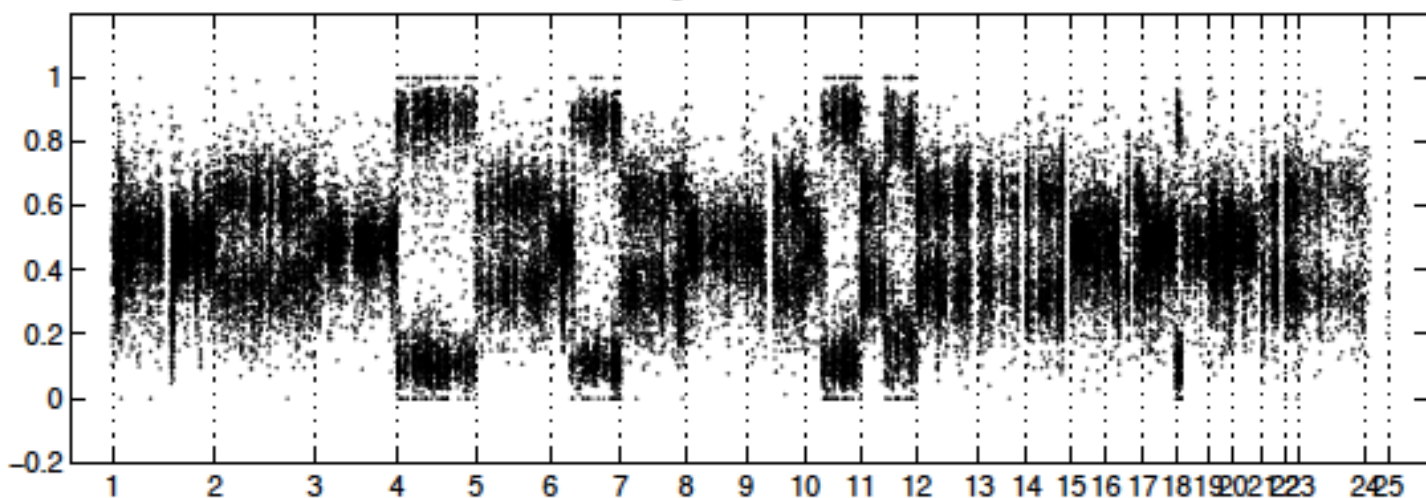

154\_ucsc.edu\_BRCA.IlluminaGA\_DNASeq.Level\_2.14.0.0\_TCGA-A2-A0ET\_W  
germline-het

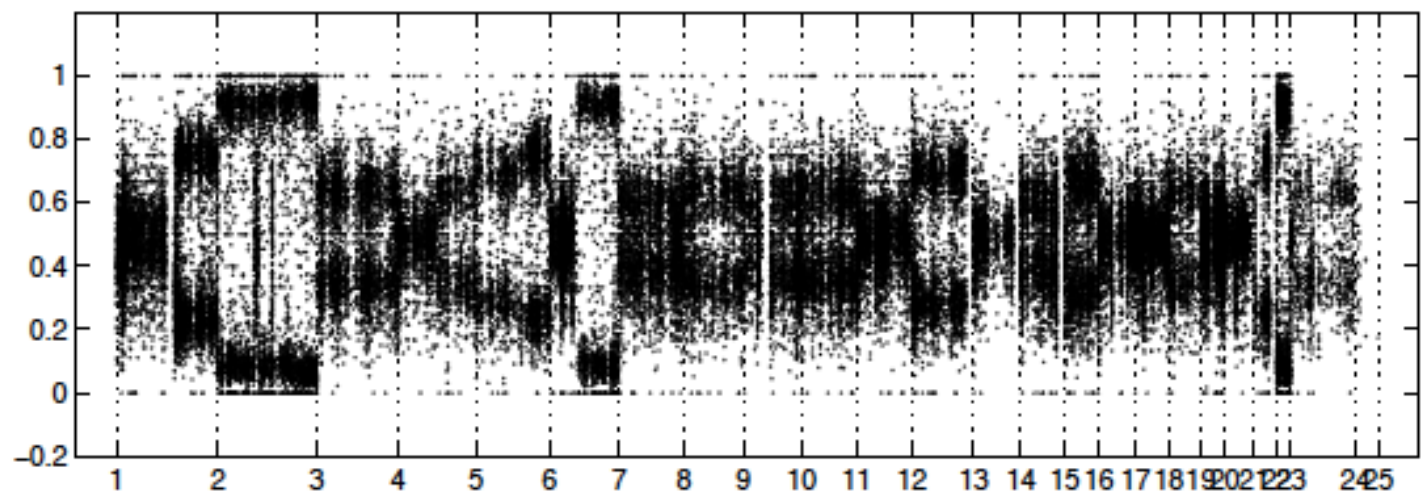

155\_ucsc.edu\_BRCA.IlluminaGA\_DNASeq.Level\_2.4.0.0\_TCGA-A8-A093\_W  
germline-het

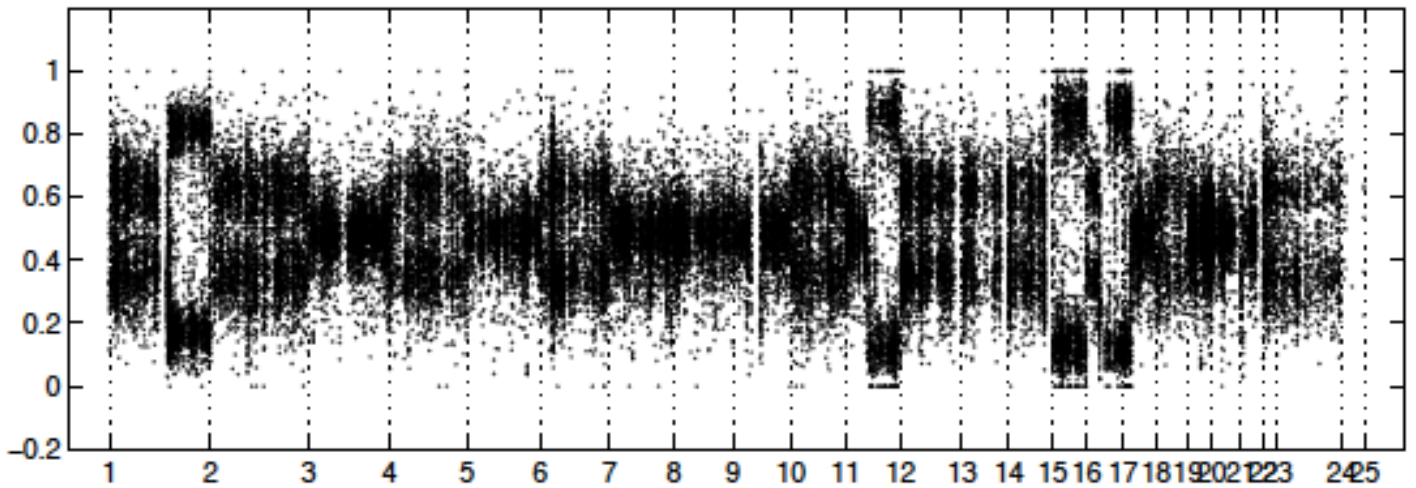

156\_ucsc.edu\_BRCA.IlluminaGA\_DNASeq.Level\_2.4.0.0\_TCGA-A8-A06Y\_W  
germline-het

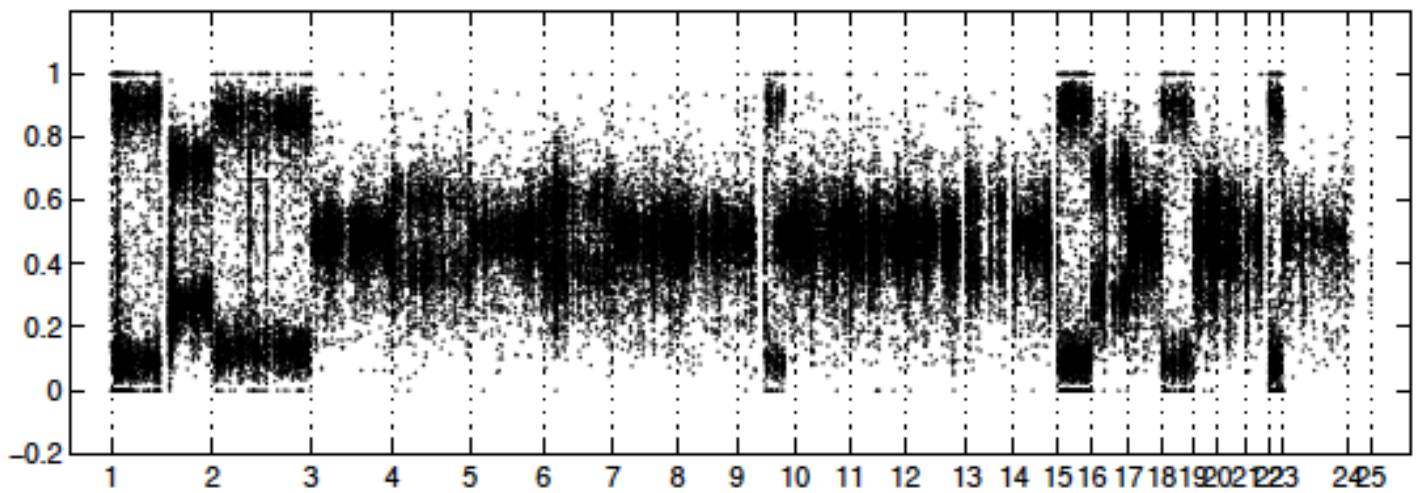

157\_ucsc.edu\_BRCA.IlluminaGA\_DNASeq.Level\_2.11.0.0\_TCGA-C8-A1HG\_D  
germline-het

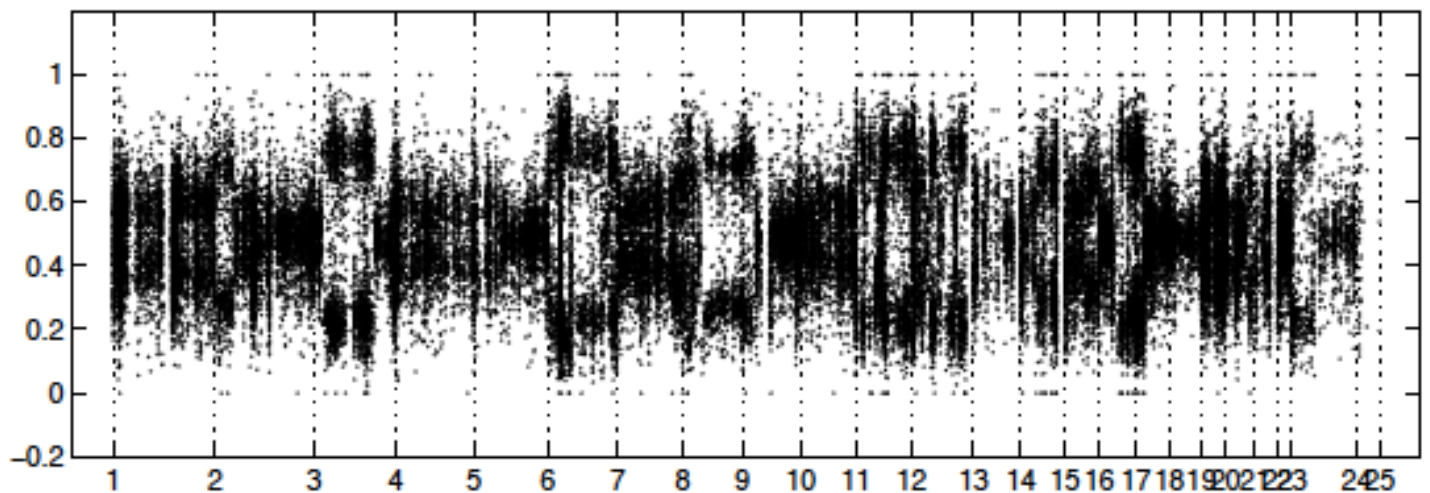

158\_ucsc.edu\_BRCA.IlluminaGA\_DNASeq.Level\_2.3.0.0\_TCGA-A7-A0CD\_W  
germline-het

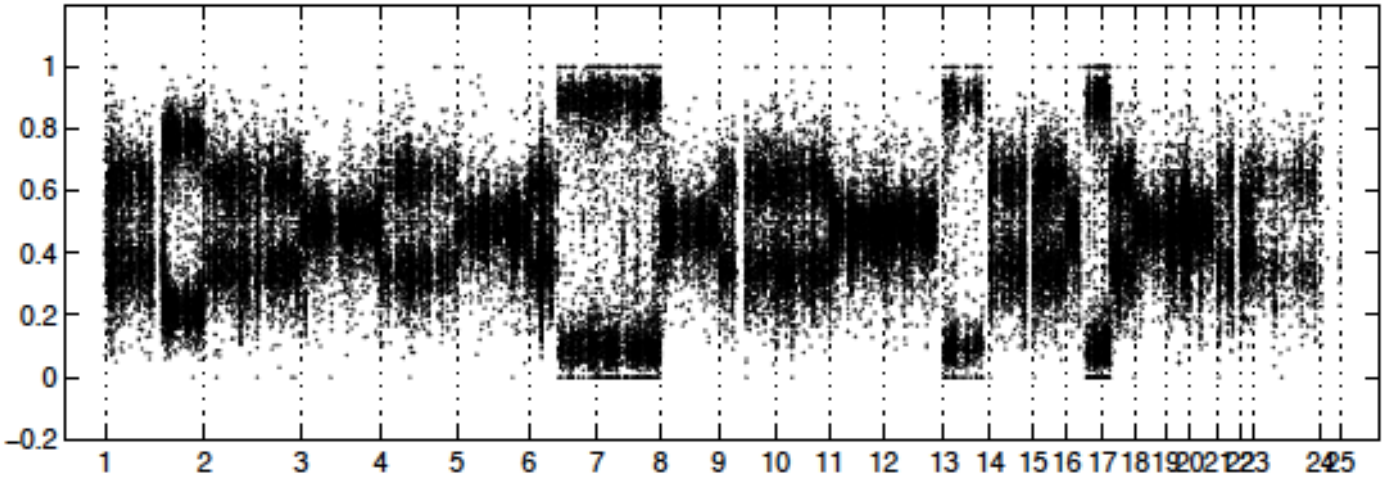

159\_ucsc.edu\_BRCA.IlluminaGA\_DNASeq.Level\_2.6.0.0\_TCGA-AO-A0J3\_W  
germline-het

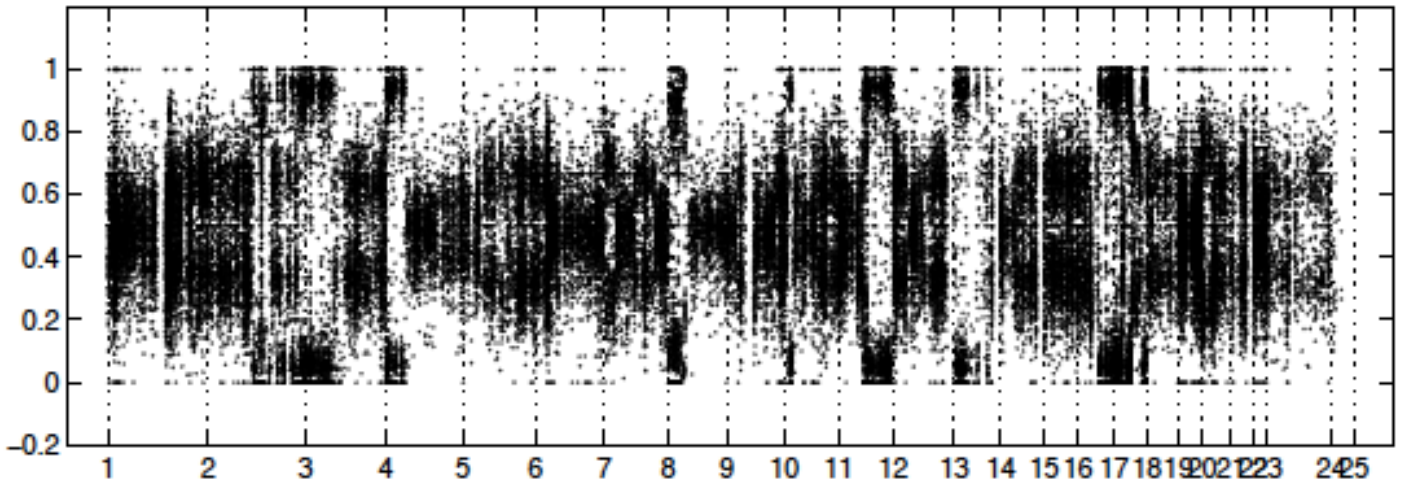

160\_ucsc.edu\_BRCA.IlluminaGA\_DNASeq.Level\_2.4.0.0\_TCGA-A8-A09W\_W  
germline-het

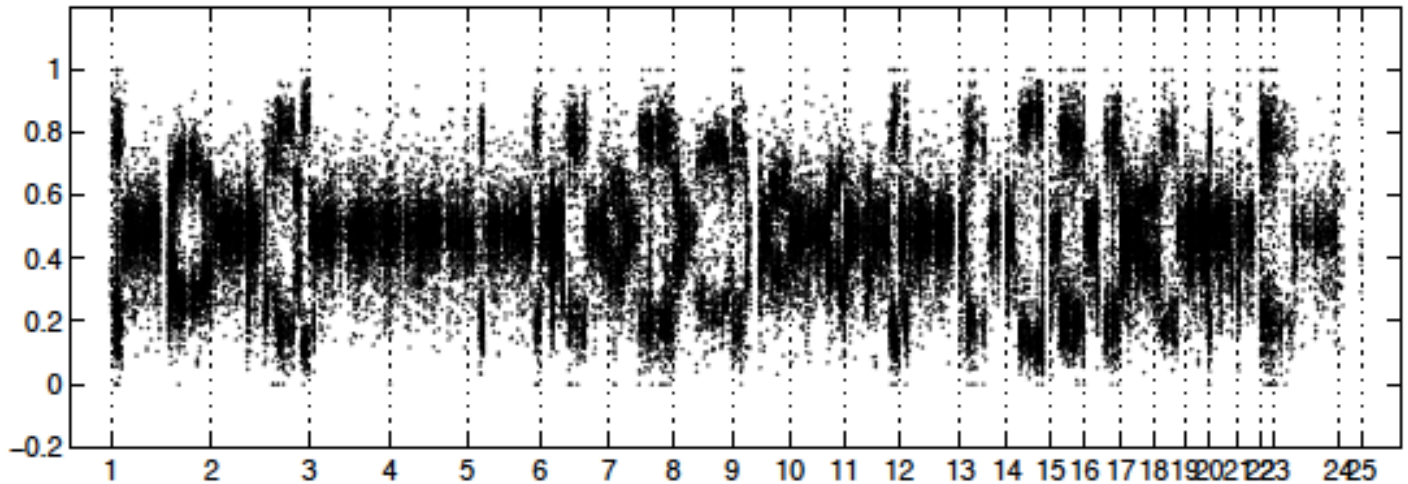

161\_ucsc.edu\_BRCA.IlluminaGA\_DNASeq.Level\_2.5.0.0\_TCGA-AN-A0AS\_W  
germline-het

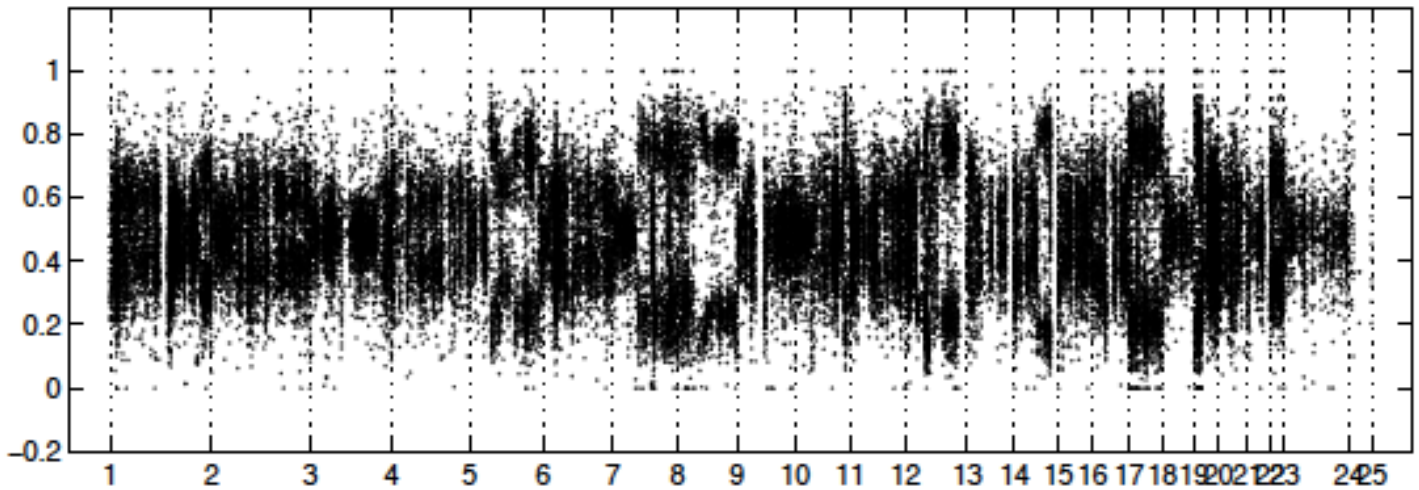

162\_ucsc.edu\_BRCA.IlluminaGA\_DNASeq.Level\_2.2.0.0\_TCGA-A2-A0YH\_D  
germline-het

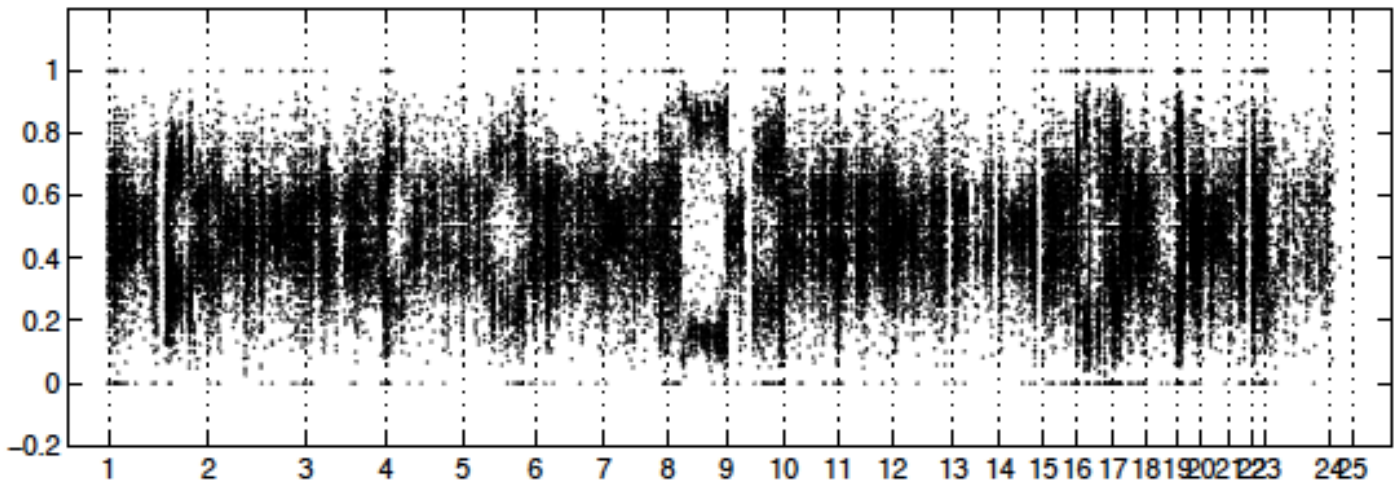

163\_ucsc.edu\_BRCA.IlluminaGA\_DNASeq.Level\_2.6.0.0\_TCGA-AO-A03N\_D  
germline-het

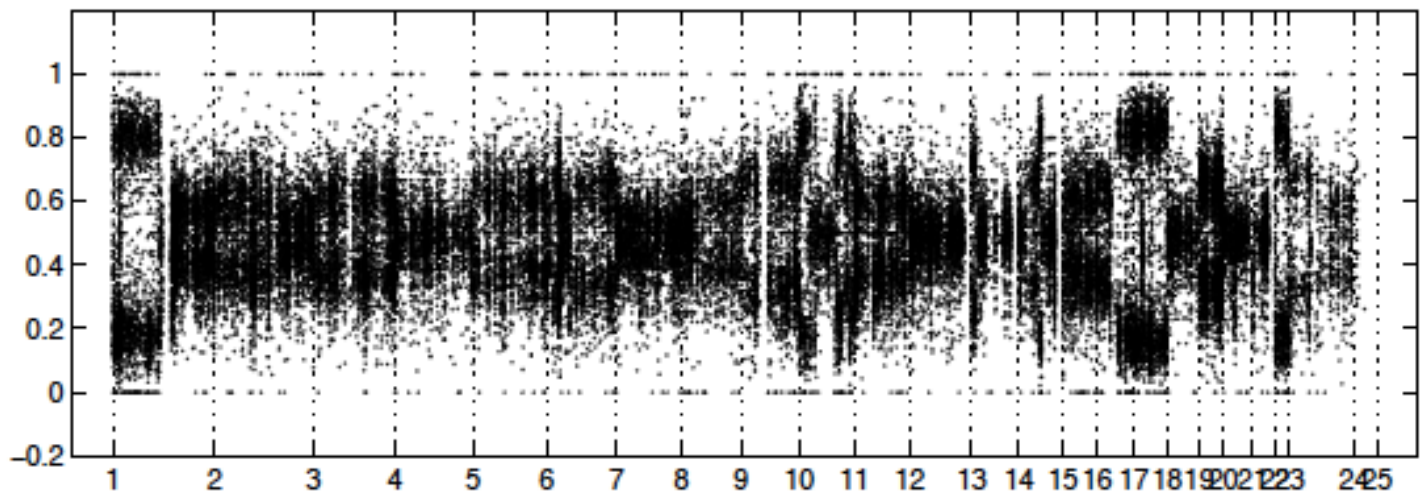



164\_ucsc.edu\_BRCA.IlluminaGA\_DNASeq.Level\_2.4.0.0\_TCGA-A8-A08J\_W  
germline-het

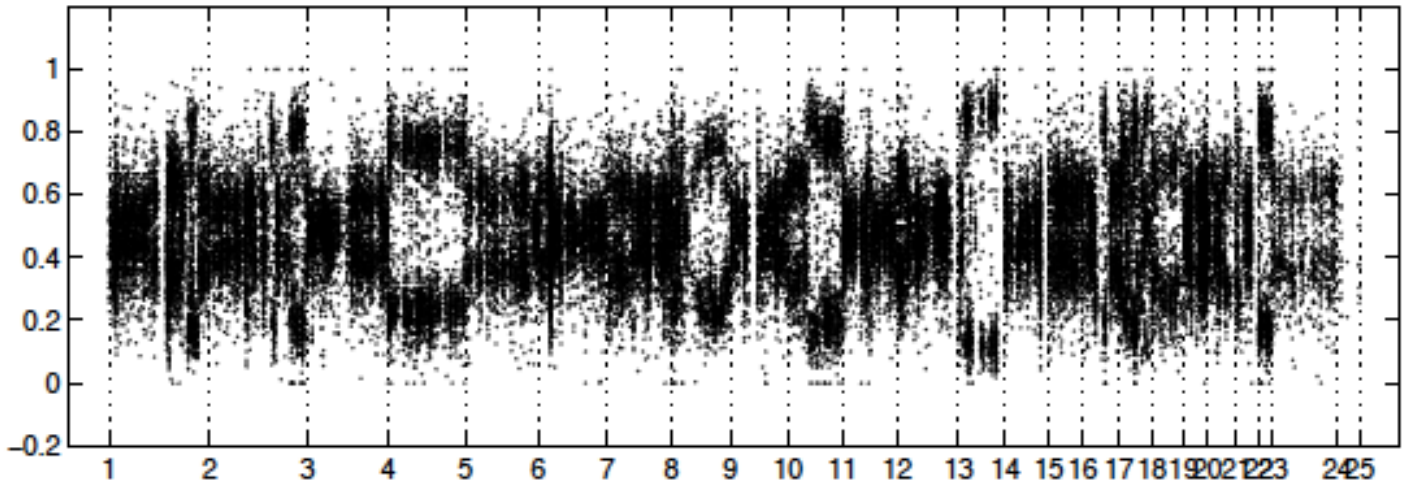

165\_ucsc.edu\_BRCA.IlluminaGA\_DNASeq.Level\_2.10.0.0\_TCGA-BH-A0DD\_D  
germline-het

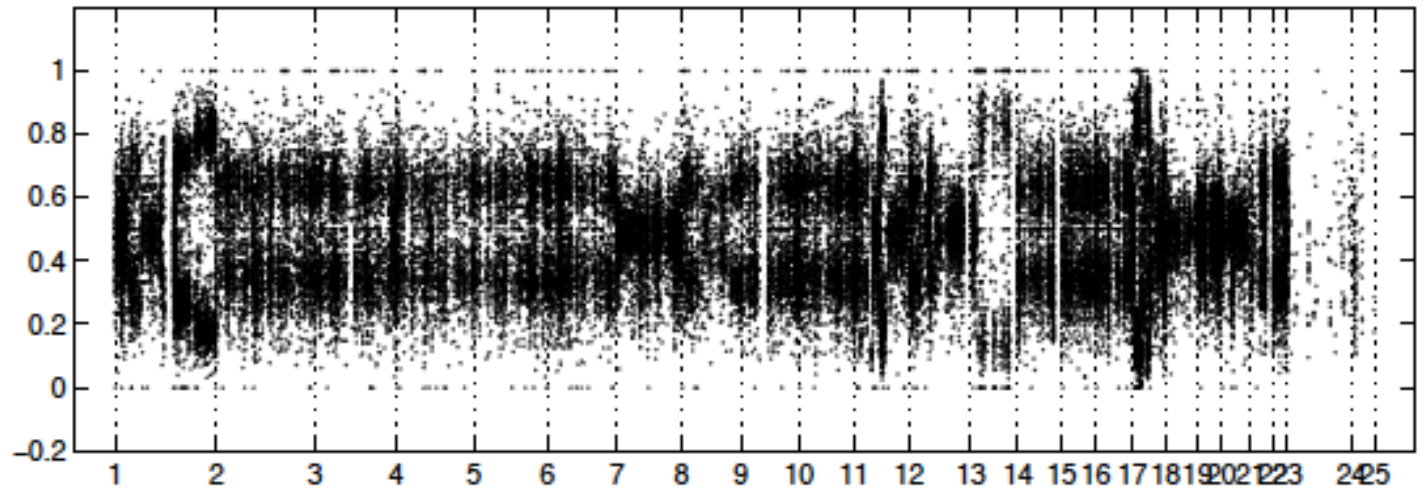

166\_ucsc.edu\_BRCA.IlluminaGA\_DNASeq.Level\_2.6.0.0\_TCGA-AO-A128\_D  
germline-het

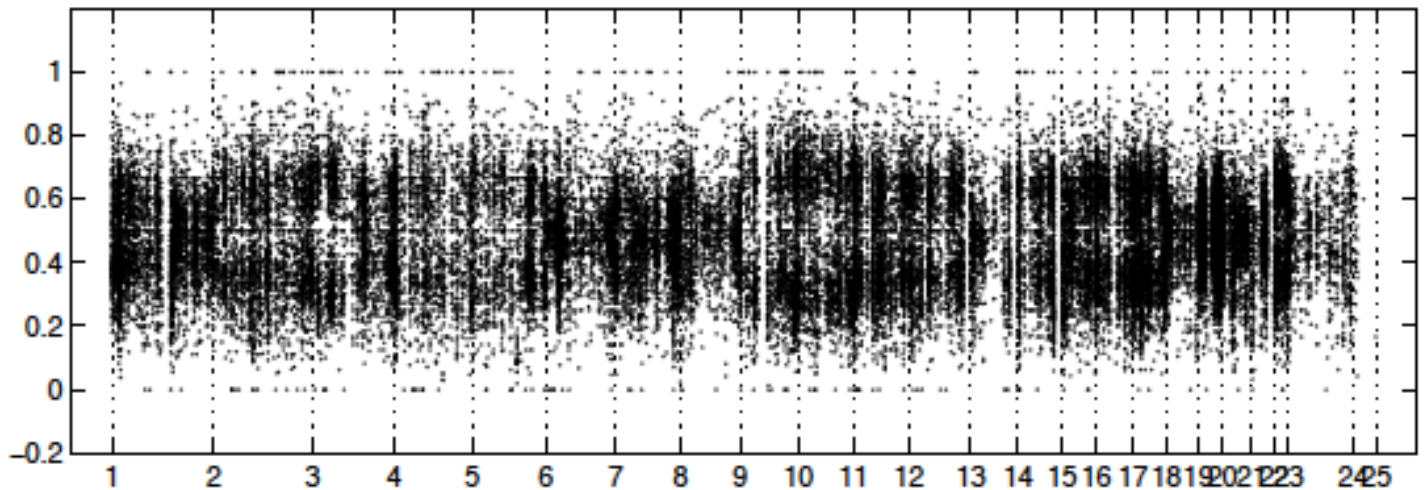

167\_ucsc.edu\_BRCA.IlluminaGA\_DNASeq.Level\_2.4.0.0\_TCGA-A8-A09R\_W  
germline-het

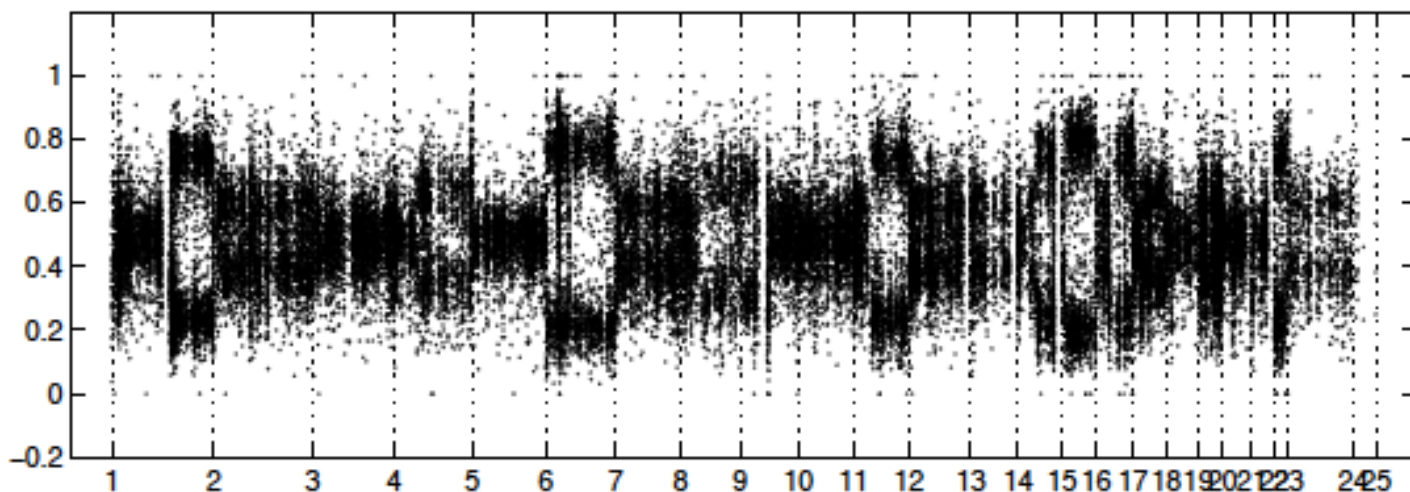

168\_ucsc.edu\_BRCA.IlluminaGA\_DNASeq.Level\_2.6.0.0\_TCGA-A0-A0JD\_W  
germline-het

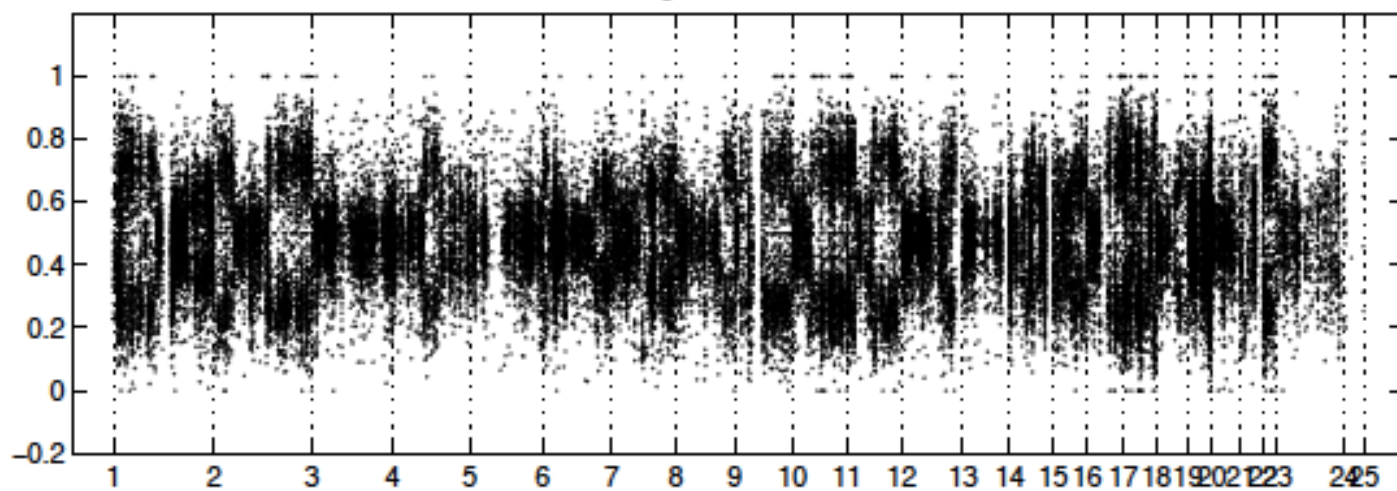

169\_ucsc.edu\_BRCA.IlluminaGA\_DNASeq.Level\_2.13.0.0\_TCGA-E2-A15R\_D  
germline-het

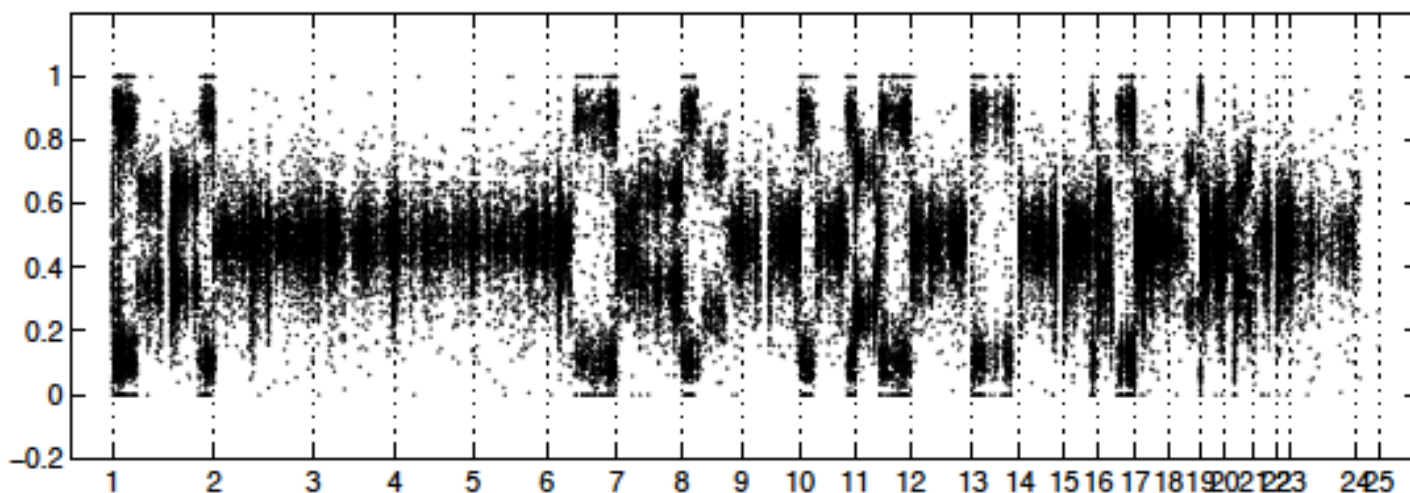

170\_ucsc.edu\_BRCA.IlluminaGA\_DNASeq.Level\_2.11.0.0\_TCGA-C8-A12K\_D  
germline-het

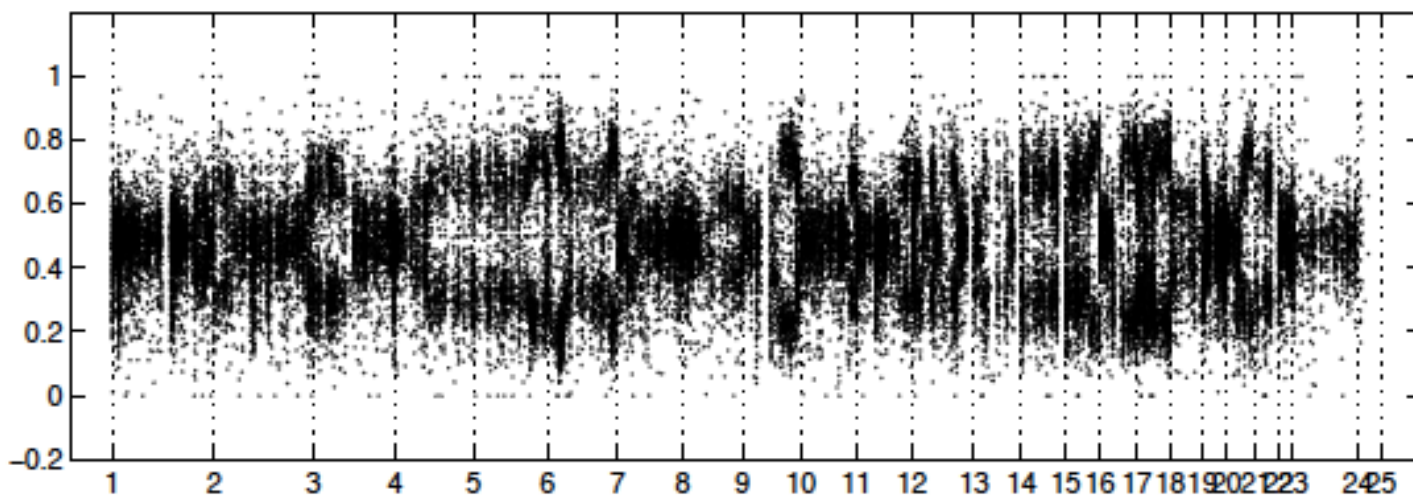

171\_ucsc.edu\_BRCA.IlluminaGA\_DNASeq.Level\_2.10.0.0\_TCGA-BH-A18K\_D  
germline-het

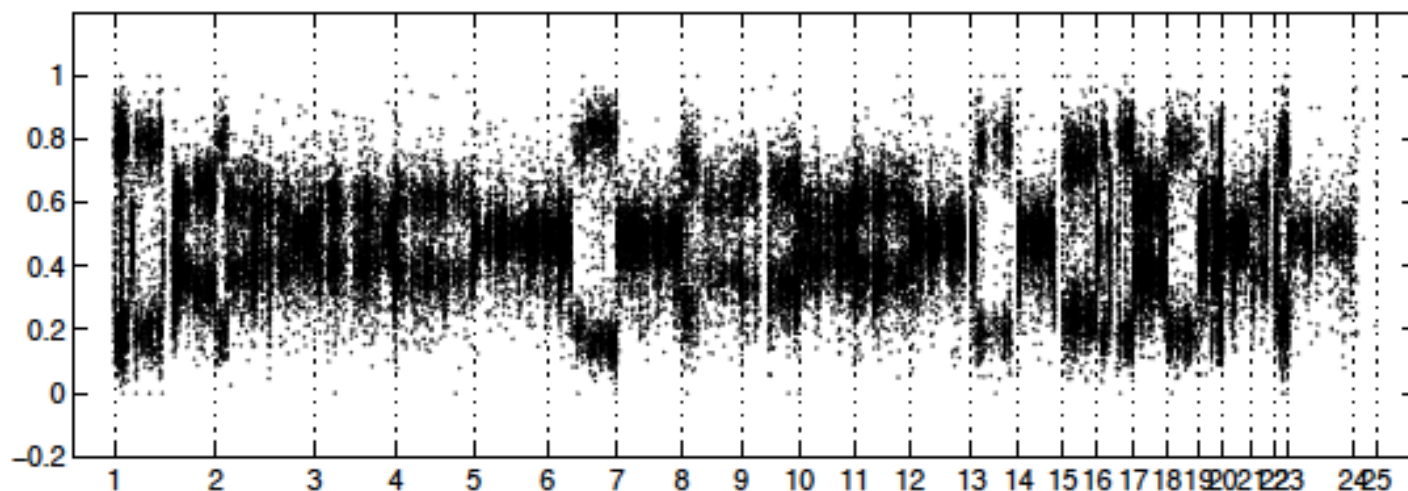

172\_ucsc.edu\_BRCA.IlluminaGA\_DNASeq.Level\_2.10.0.0\_TCGA-BH-A0HQ\_W  
germline-het

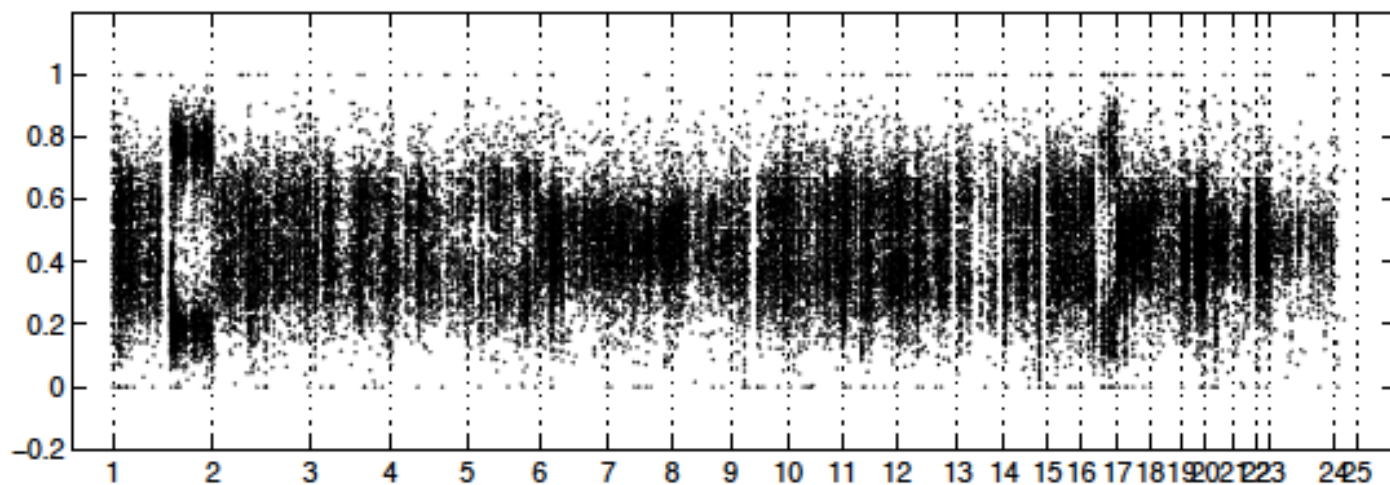

173\_ucsc.edu\_BRCA.IlluminaGA\_DNASeq.Level\_2.1.0.0\_TCGA-A1-A0SK\_D  
germline-het

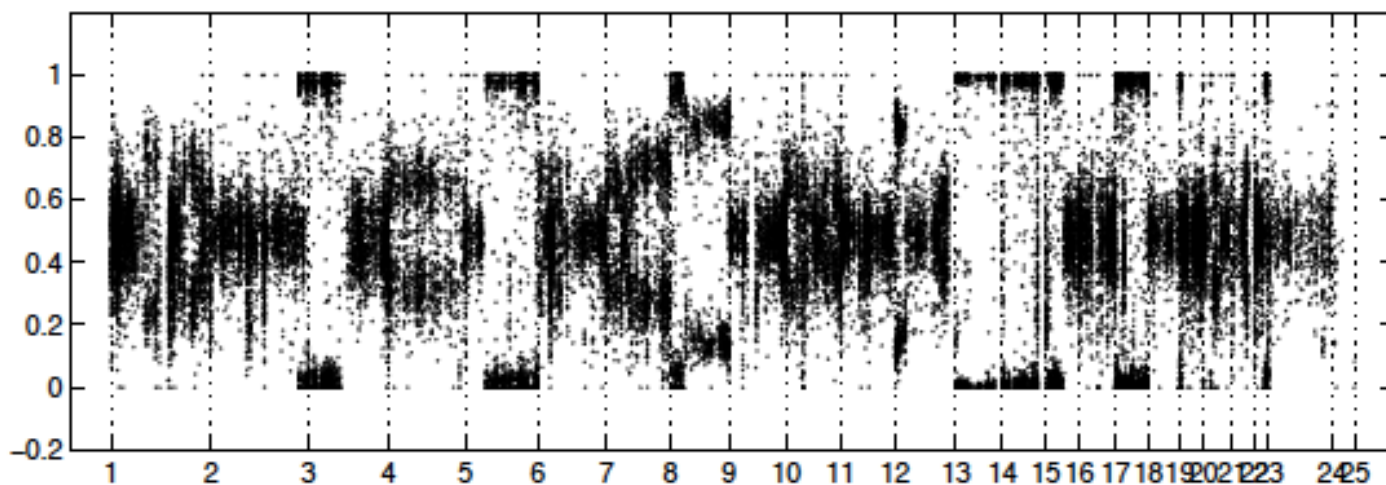

174\_ucsc.edu\_BRCA.IlluminaGA\_DNASeq.Level\_2.6.0.0\_TCGA-A0-A0JM\_W  
germline-het

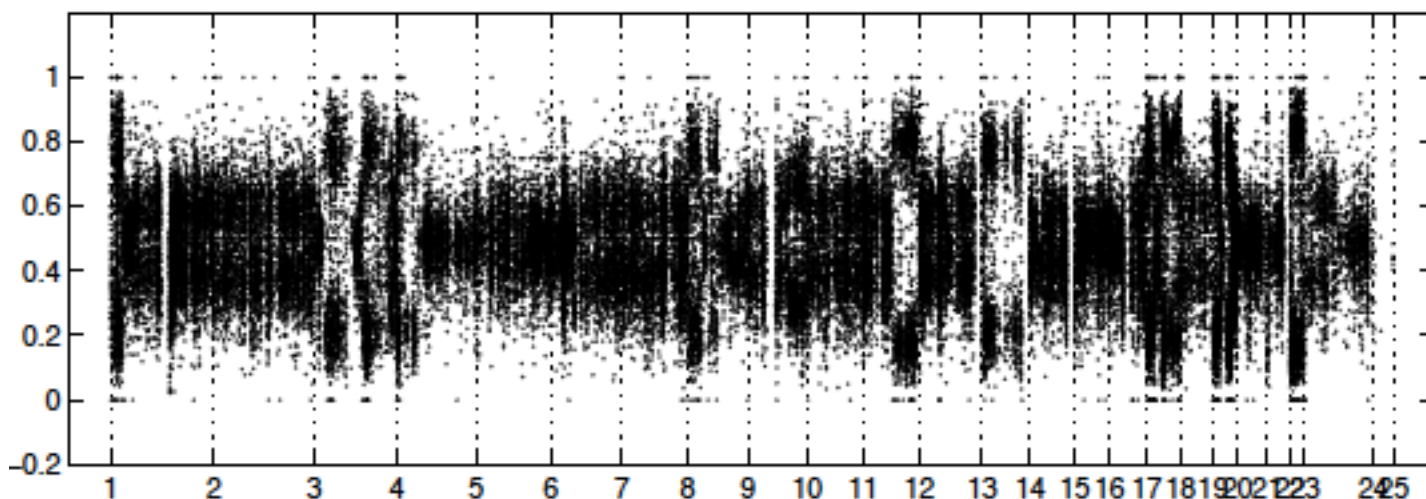

175\_ucsc.edu\_BRCA.IlluminaGA\_DNASeq.Level\_2.2.0.0\_TCGA-A2-A0T0\_D  
germline-het

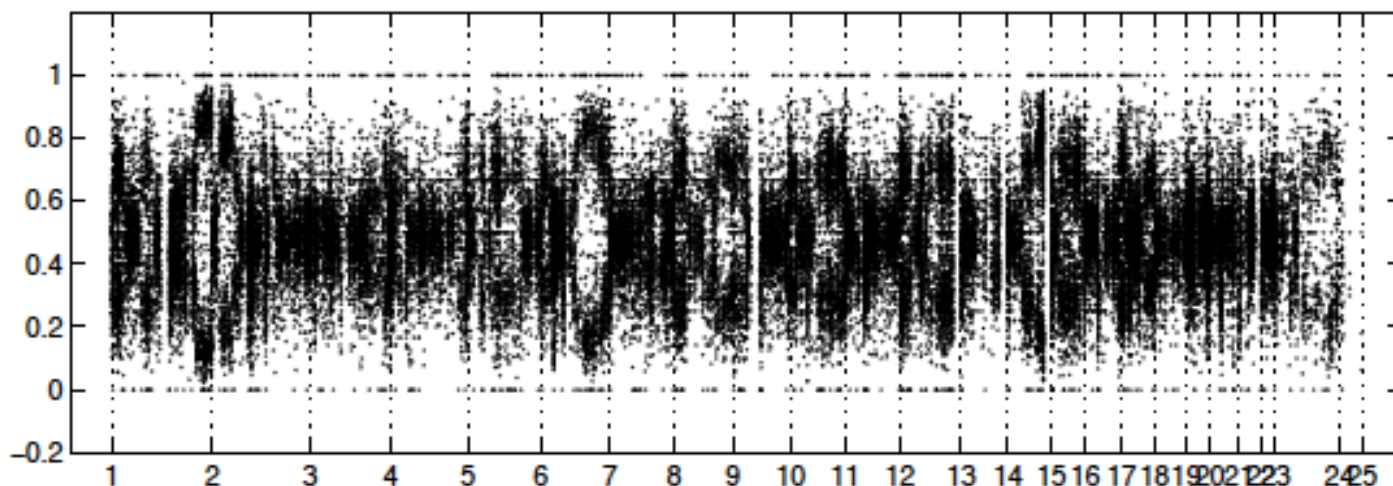

176\_ucsc.edu\_BRCA.IlluminaGA\_DNASeq.Level\_2.13.0.0\_TCGA-E2-A155\_D  
germline-het

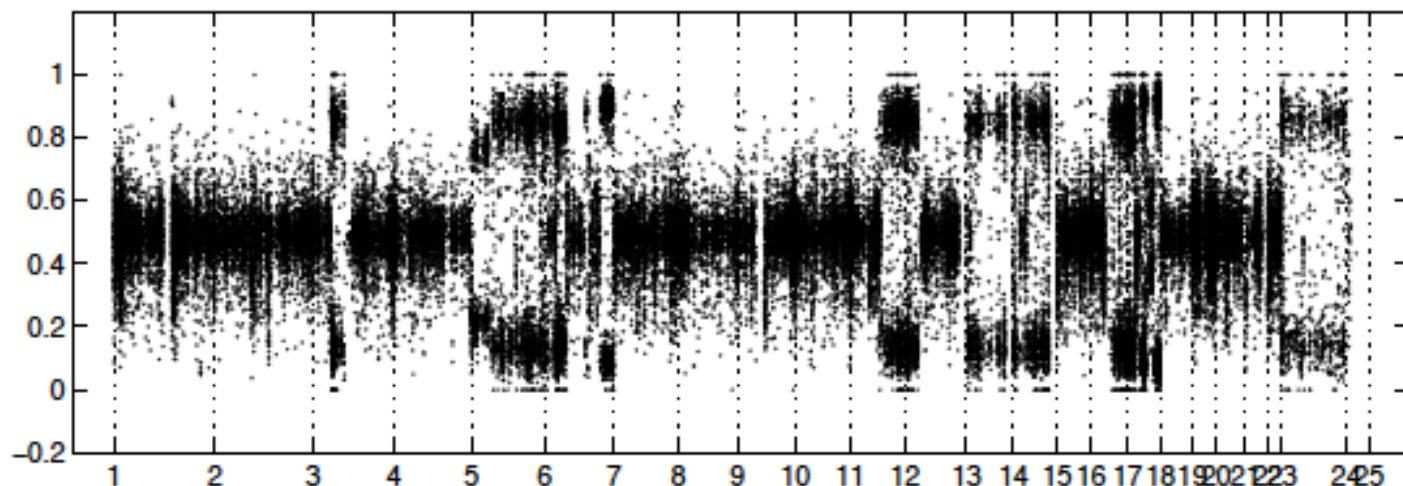

177\_ucsc.edu\_BRCA.IlluminaGA\_DNASeq.Level\_2.6.0.0\_TCGA-AO-A03P\_W  
germline-het

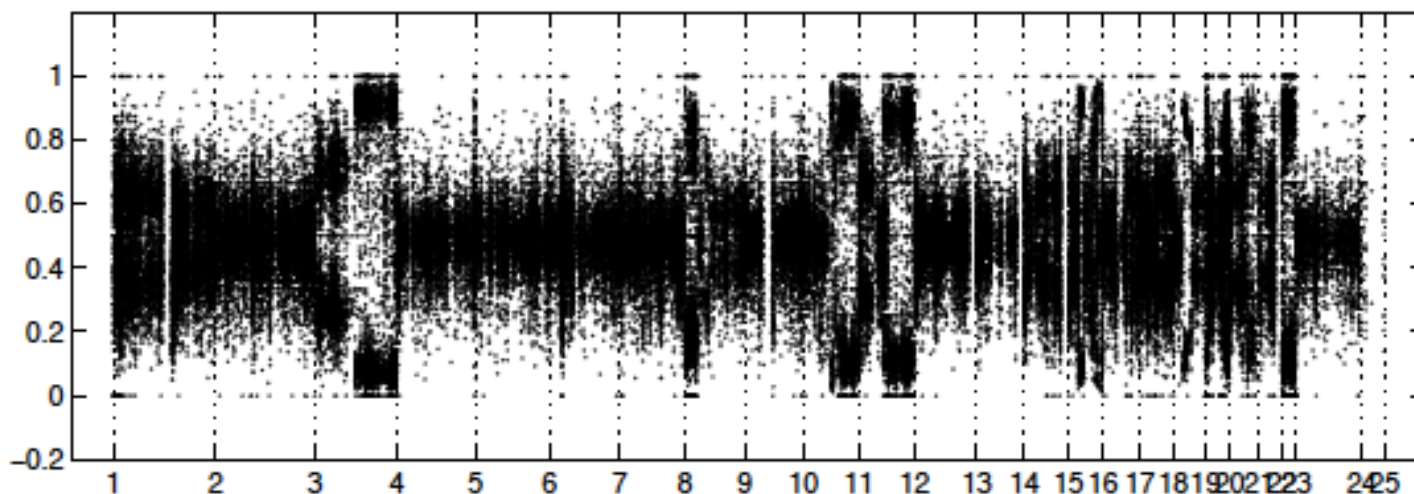

178\_ucsc.edu\_BRCA.IlluminaGA\_DNASeq.Level\_2.10.0.0\_TCGA-BH-A0BL\_D  
germline-het

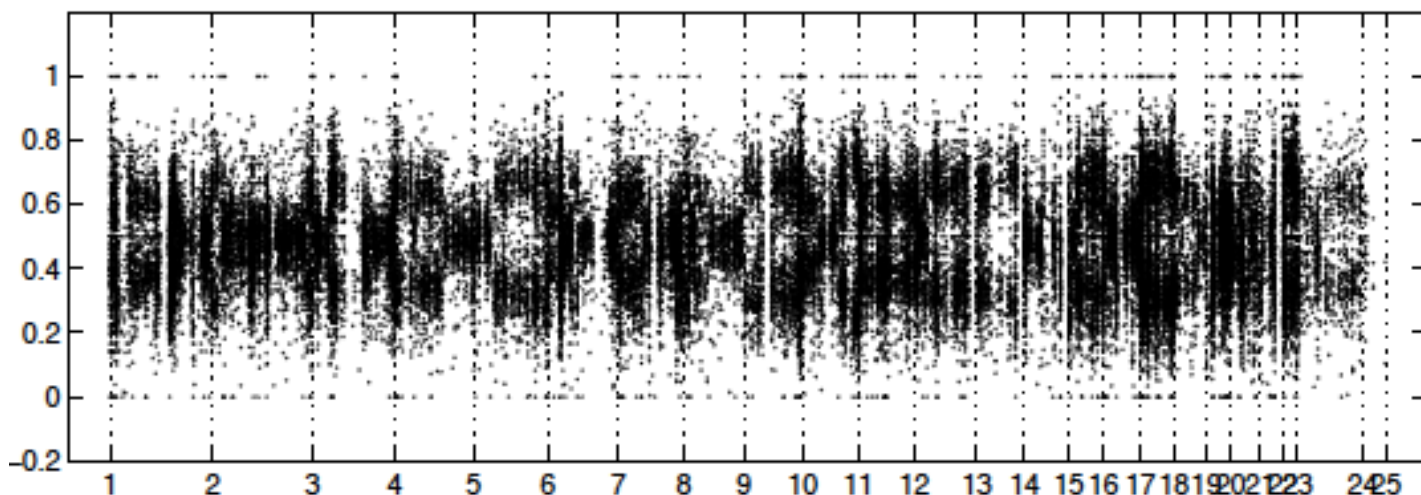

179\_ucsc.edu\_BRCA.IlluminaGA\_DNASeq.Level\_2.4.0.0\_TCGA-A8-A076\_W  
germline-het

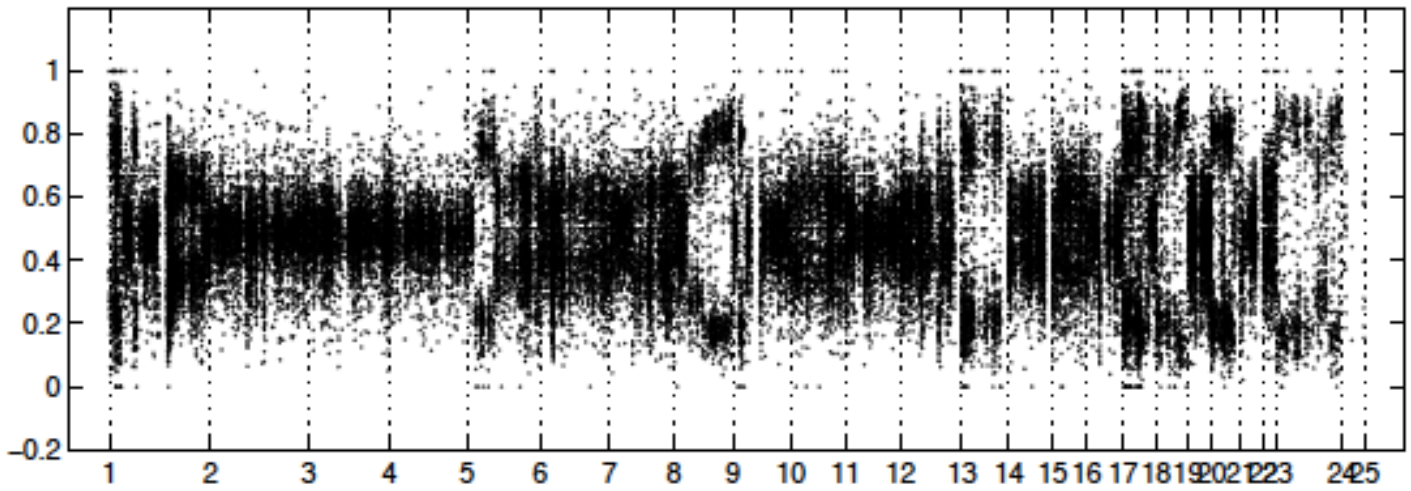

180\_ucsc.edu\_BRCA.IlluminaGA\_DNASeq.Level\_2.11.0.0\_TCGA-C8-A138\_D  
germline-het

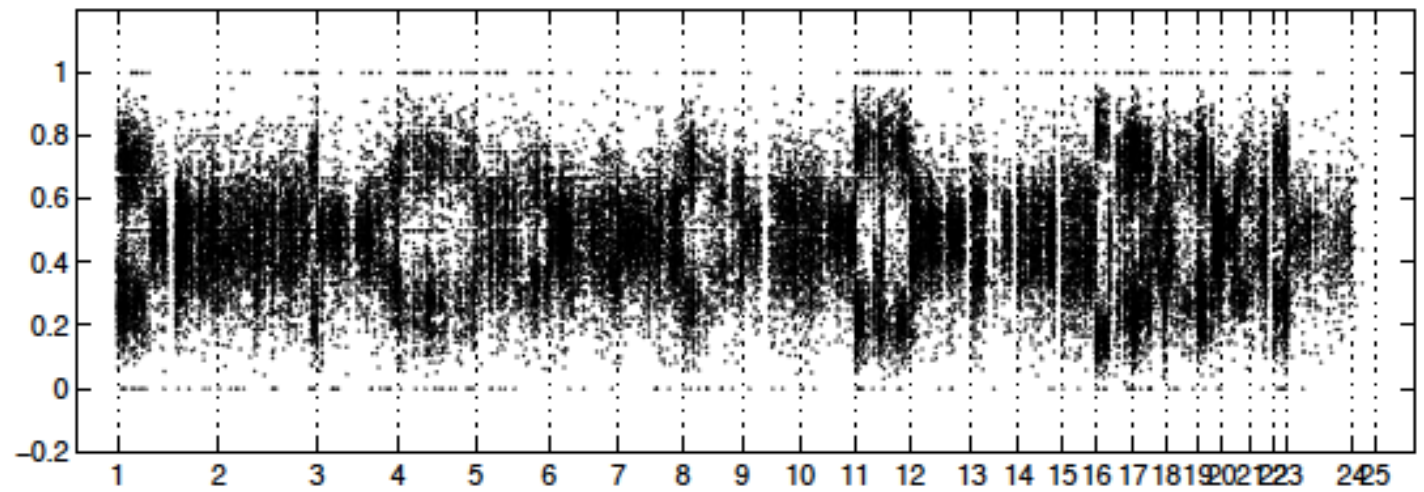

181\_ucsc.edu\_BRCA.IlluminaGA\_DNASeq.Level\_2.4.0.0\_TCGA-A8-A08G\_W  
germline-het

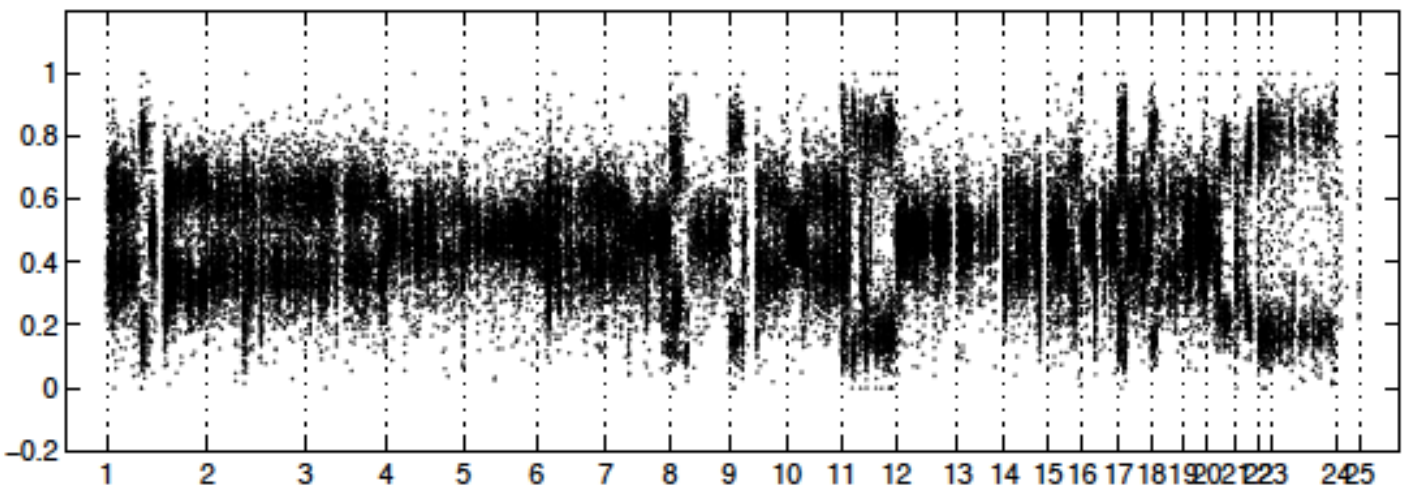

182\_ucsc.edu\_BRCA.IlluminaGA\_DNASeq.Level\_2.2.0.0\_TCGA-A2-A0YD\_D  
germline-het

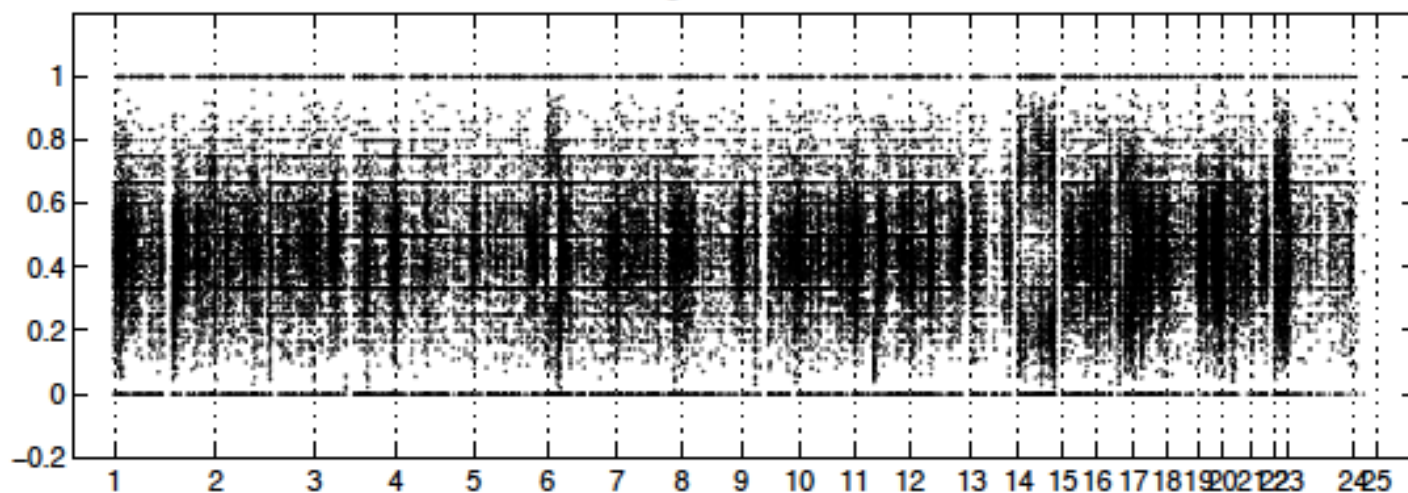

183\_ucsc.edu\_BRCA.IlluminaGA\_DNASeq.Level\_2.2.0.0\_TCGA-A2-A0CU\_W  
germline-het

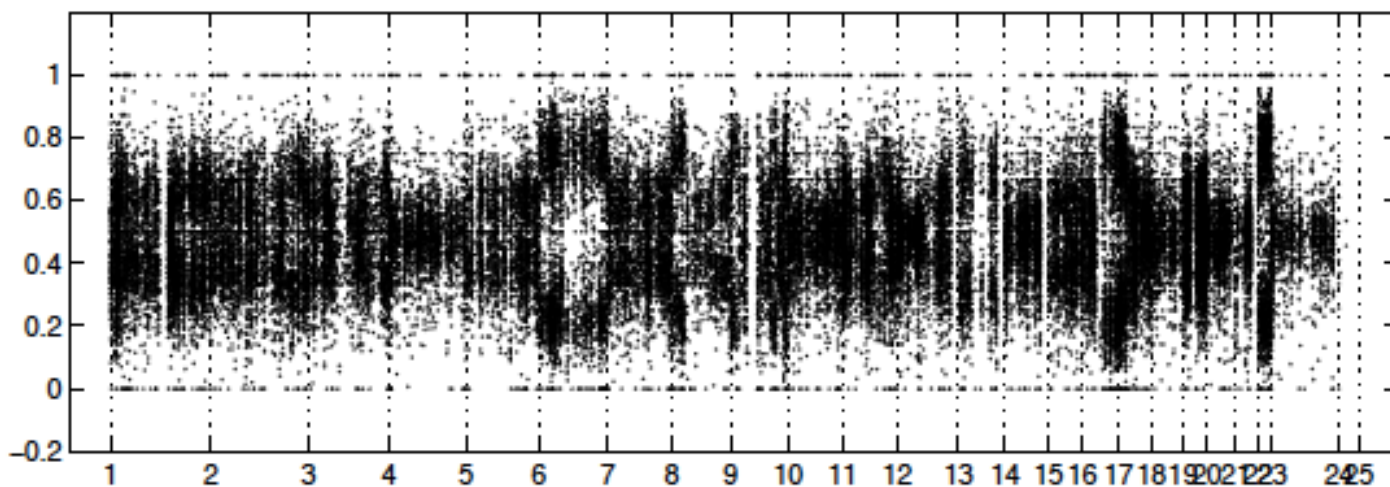

184\_ucsc.edu\_BRCA.IlluminaGA\_DNASeq.Level\_2.6.0.0\_TCGA-A0-A03V\_D  
germline-het

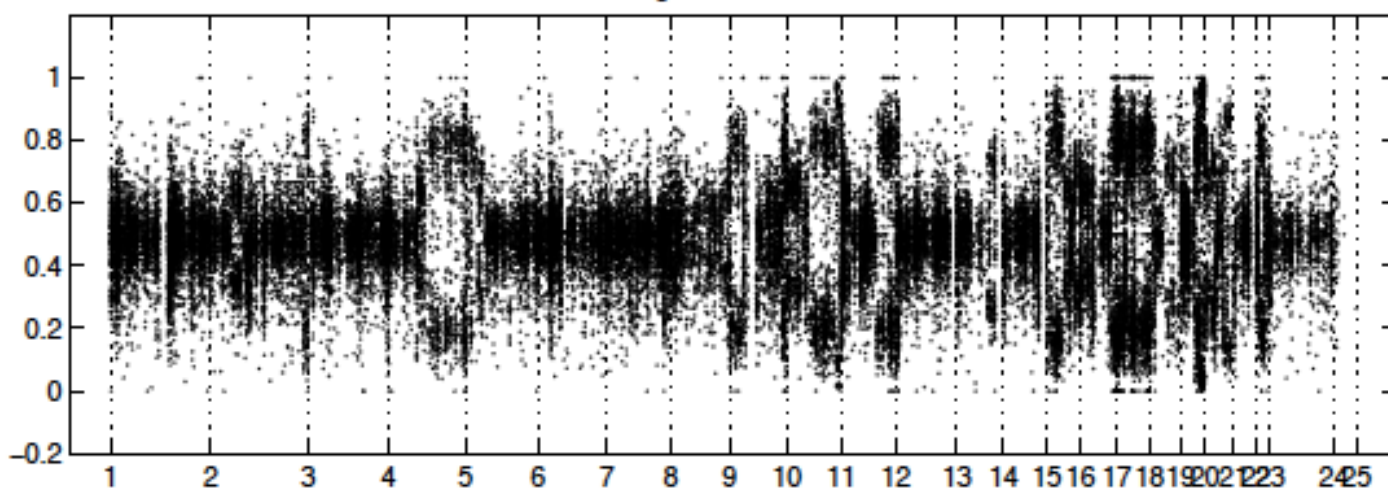

185\_ucsc.edu\_BRCA.IlluminaGA\_DNASeq.Level\_2.14.0.0\_TCGA-A8-A097\_W  
germline-het

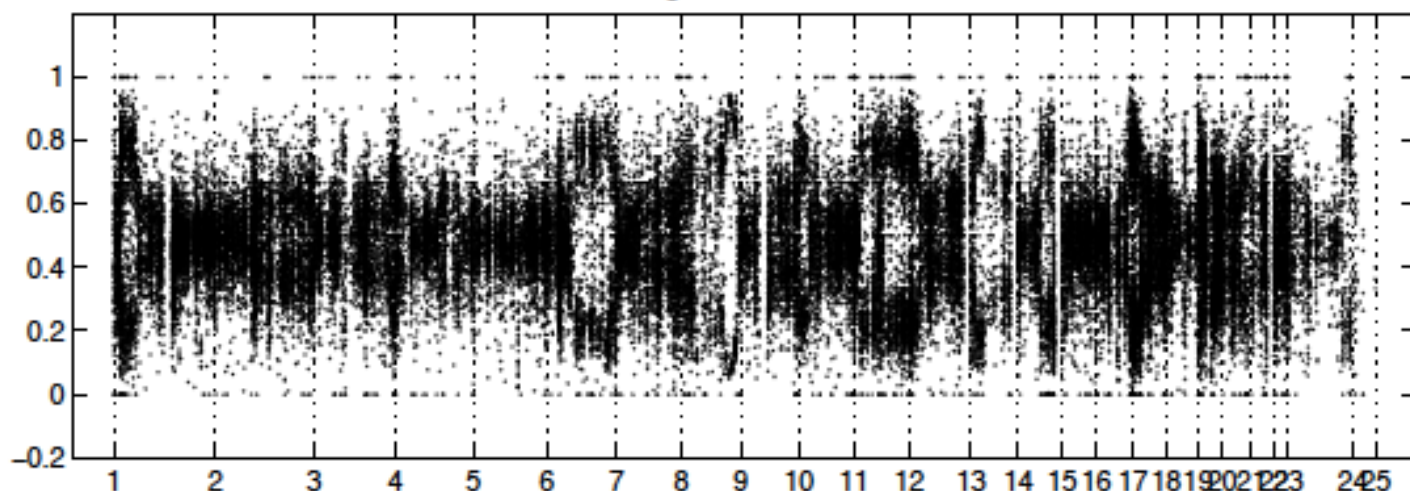

186\_ucsc.edu\_BRCA.IlluminaGA\_DNASeq.Level\_2.10.0.0\_TCGA-BH-A0B9\_W  
germline-het

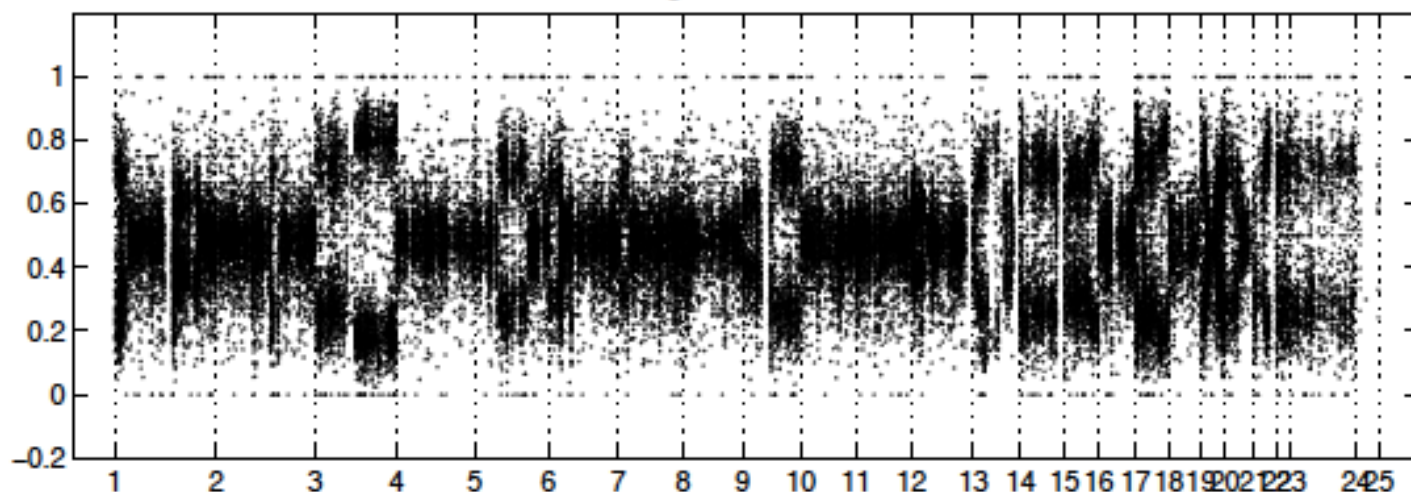

187\_ucsc.edu\_BRCA.IlluminaGA\_DNASeq.Level\_2.10.0.0\_TCGA-BH-A0BW\_D  
germline-het

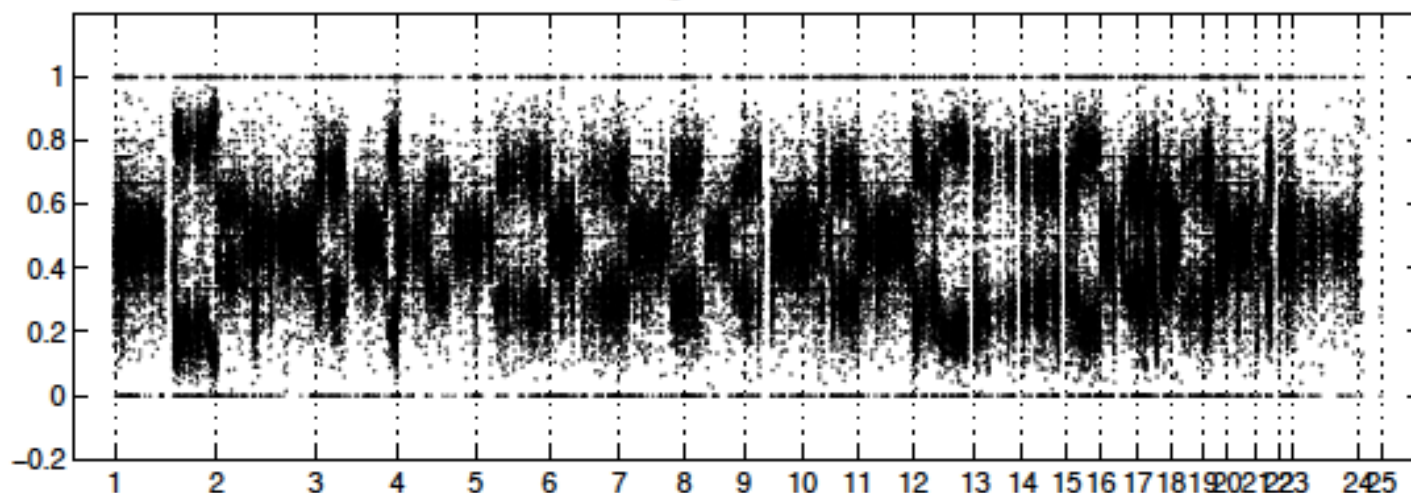



188\_ucsc.edu\_BRCA.IlluminaGA\_DNASeq.Level\_2.10.0.0\_TCGA-BH-A0AU\_D  
germline-het

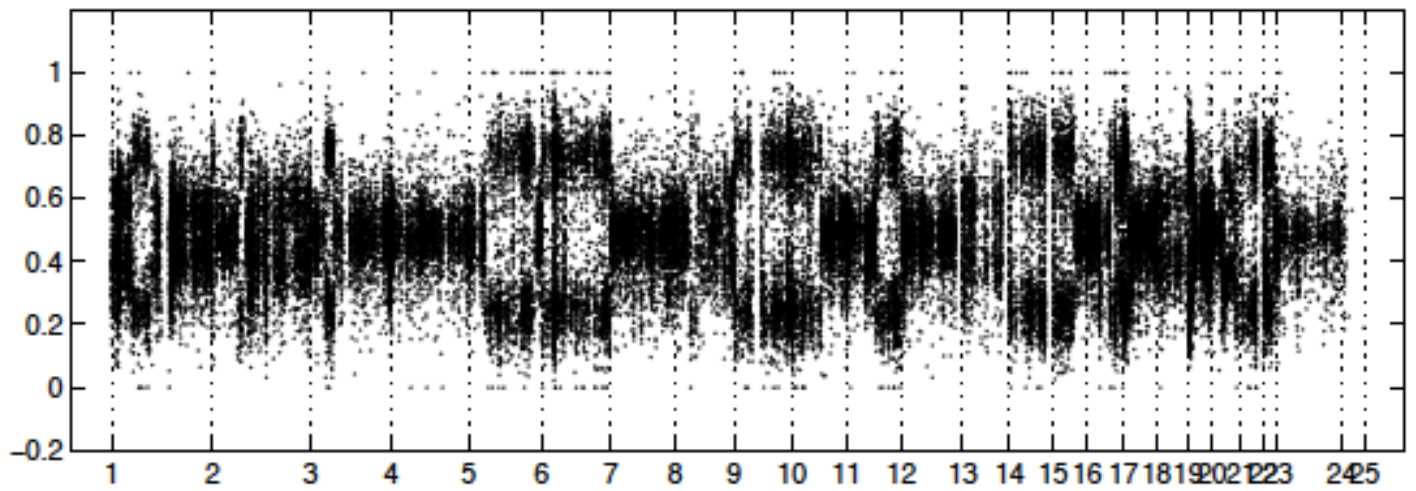

189\_ucsc.edu\_BRCA.IlluminaGA\_DNASeq.Level\_2.9.0.0\_TCGA-B6-A0WW\_D  
germline-het

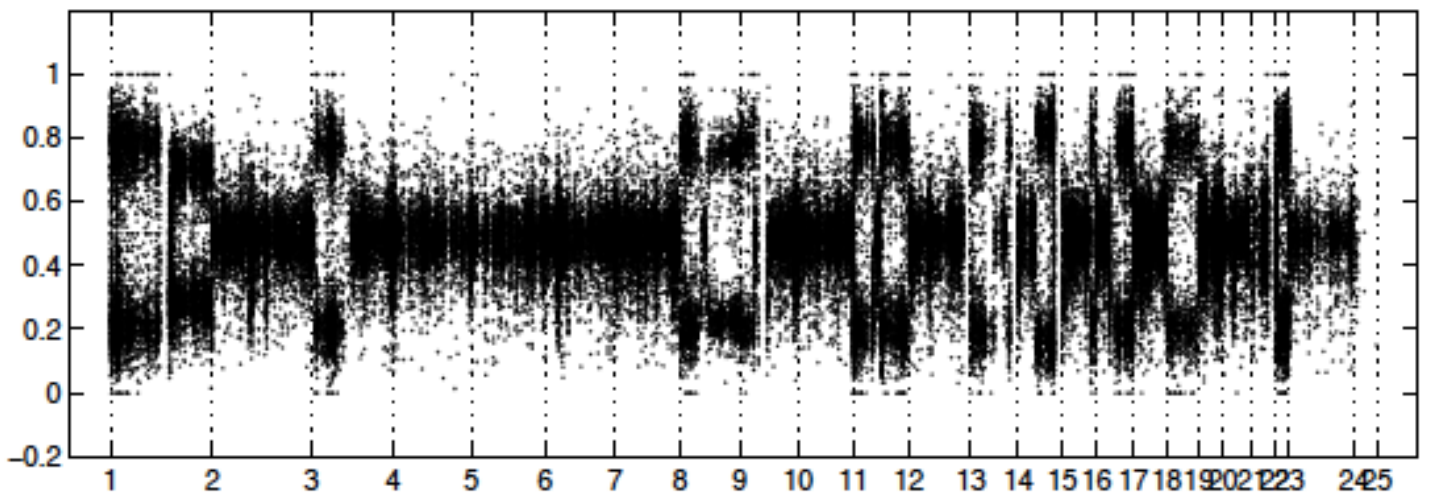

190\_ucsc.edu\_BRCA.IlluminaGA\_DNASeq.Level\_2.8.0.0\_TCGA-AR-A0U4\_D  
germline-het

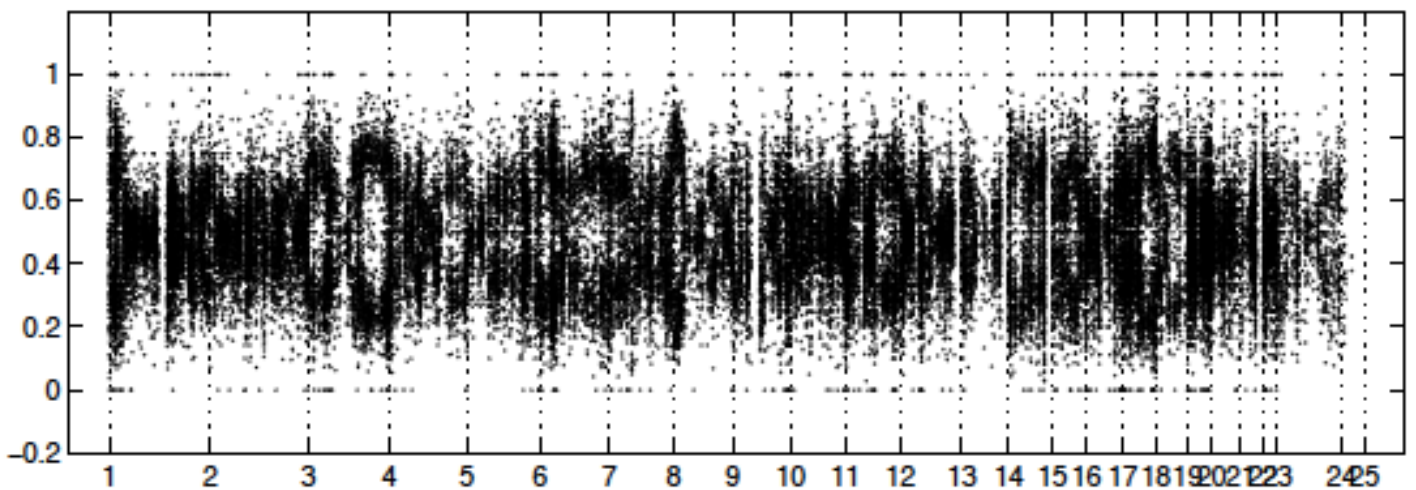

191\_ucsc.edu\_BRCA.IlluminaGA\_DNASeq.Level\_2.4.0.0\_TCGA-A8-A09I\_W  
germline-het

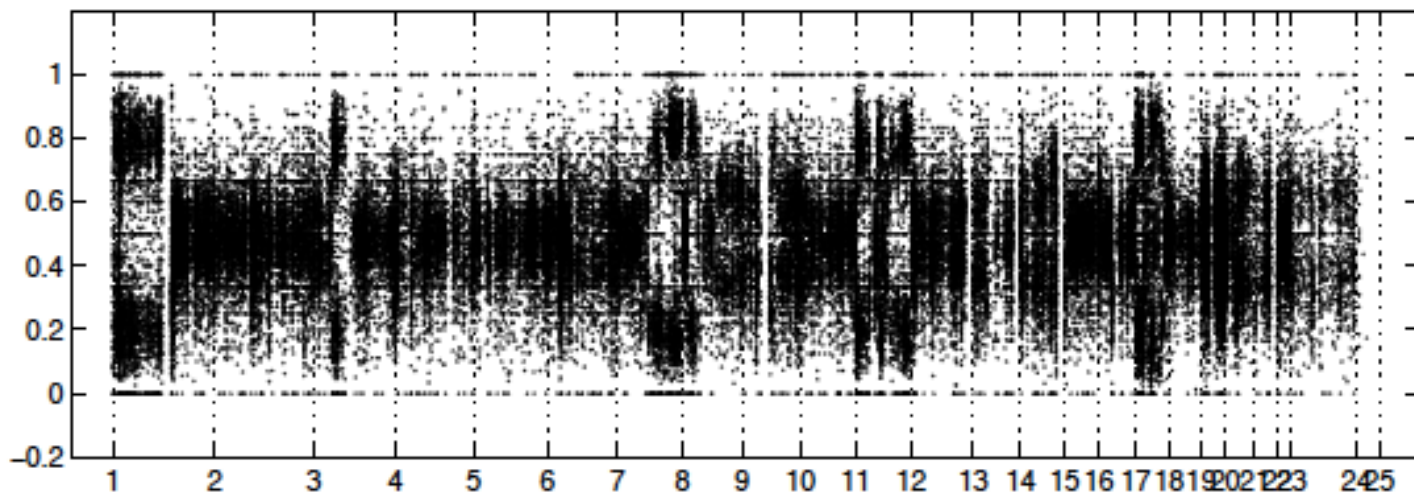

192\_ucsc.edu\_BRCA.IlluminaGA\_DNASeq.Level\_2.4.0.0\_TCGA-A8-A06T\_W  
germline-het

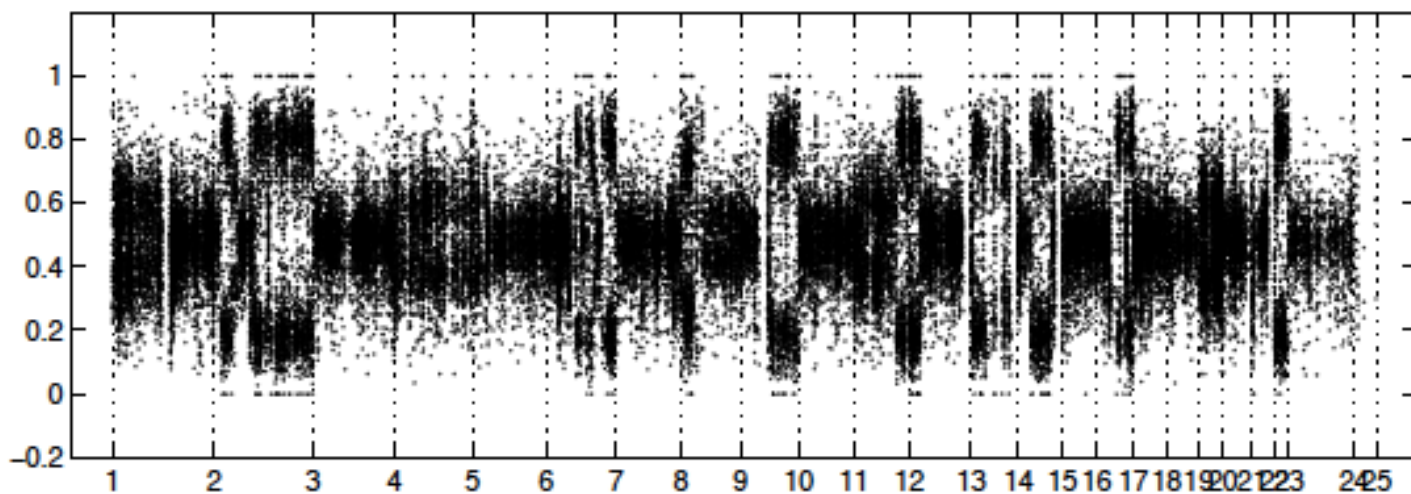

193\_ucsc.edu\_BRCA.IlluminaGA\_DNASeq.Level\_2.13.0.0\_TCGA-E2-A14W\_D  
germline-het

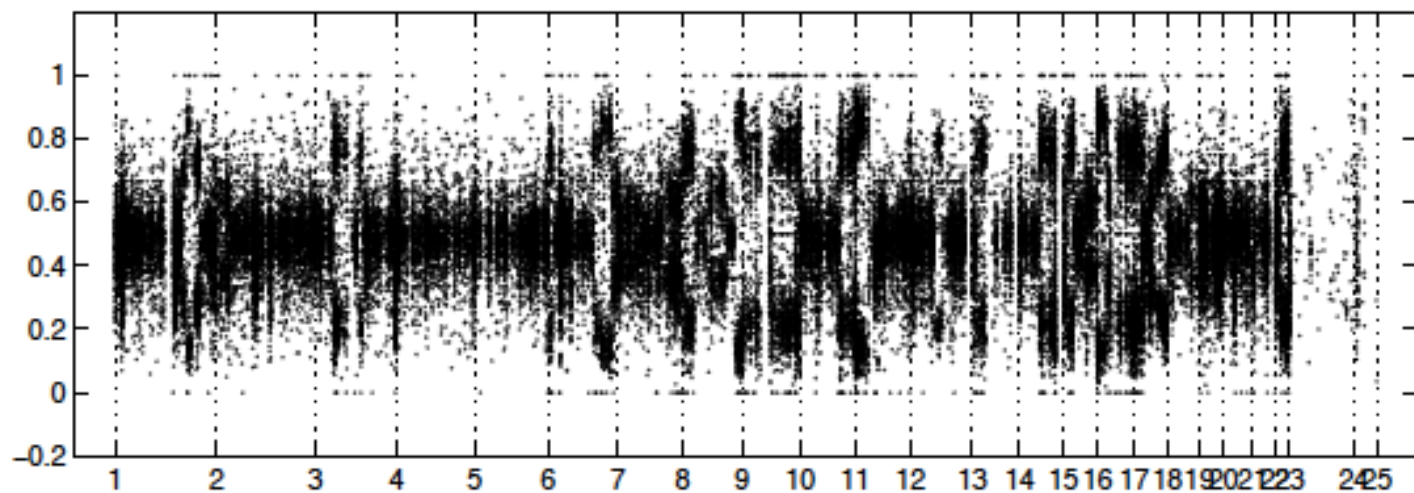

194\_ucsc.edu\_BRCA.IlluminaGA\_DNASeq.Level\_2.1.0.0\_TCGA-A1-A0SP\_D  
germline-het

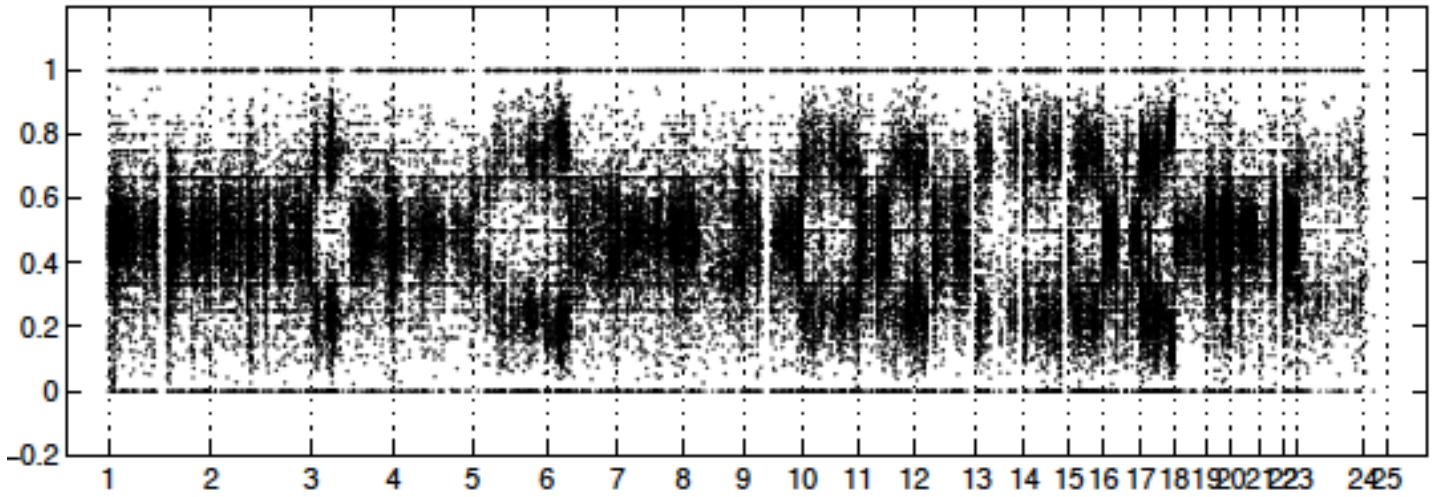

195\_ucsc.edu\_BRCA.IlluminaGA\_DNASeq.Level\_2.10.0.0\_TCGA-BH-A1EV\_D  
germline-het

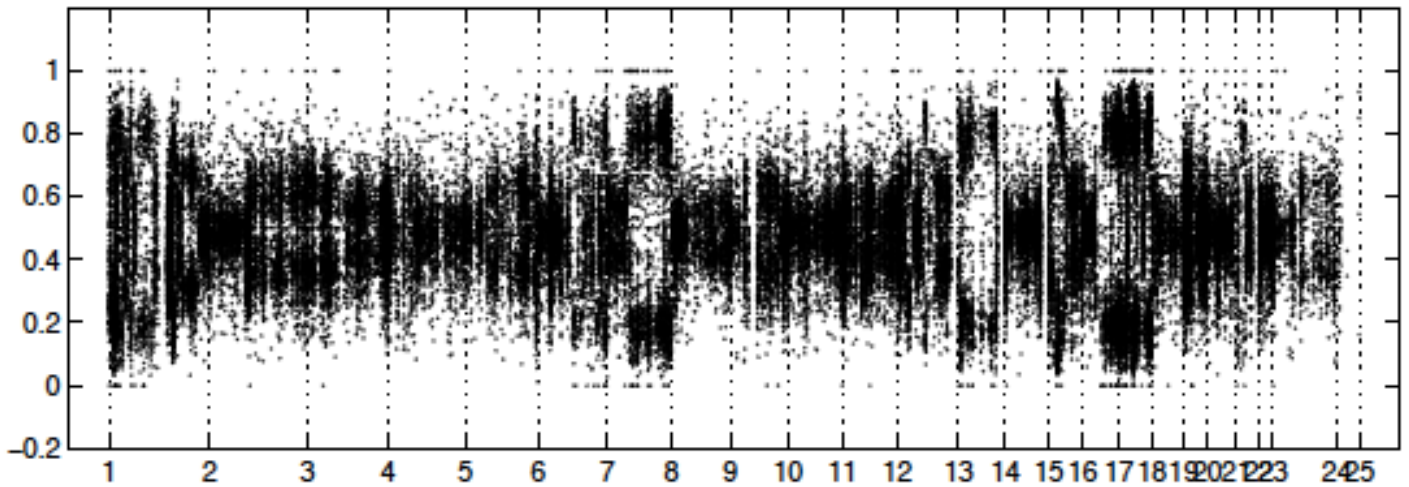

196\_ucsc.edu\_BRCA.IlluminaGA\_DNASeq.Level\_2.4.0.0\_TCGA-A8-A086\_W  
germline-het

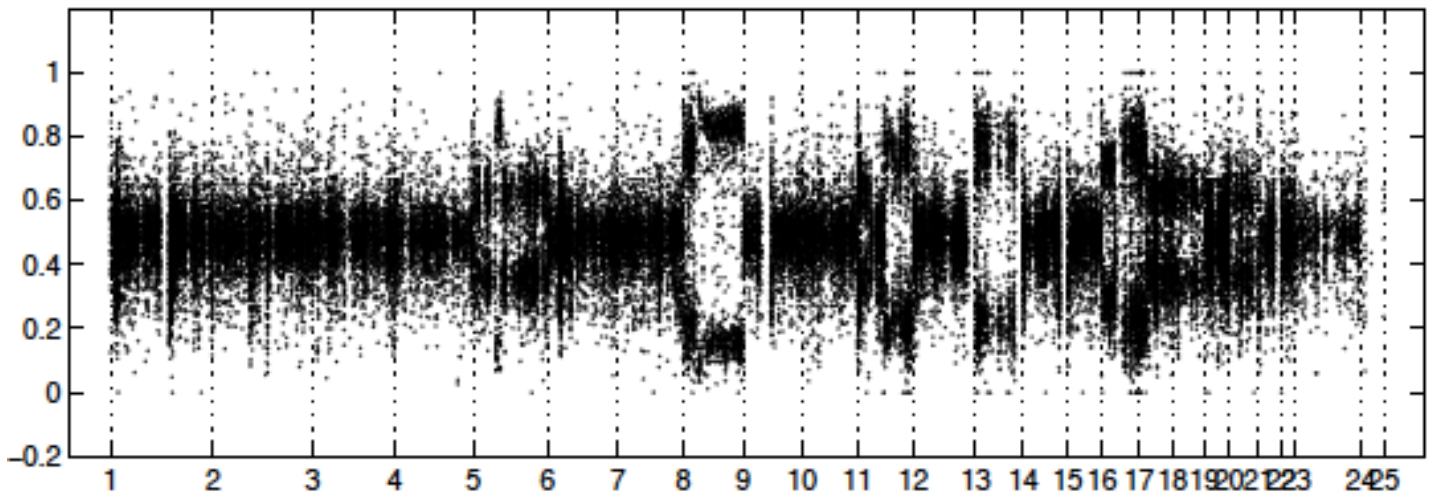

197\_ucsc.edu\_BRCA.IlluminaGA\_DNASeq.Level\_2.11.0.0\_TCGA-C8-A12Z\_D  
germline-het

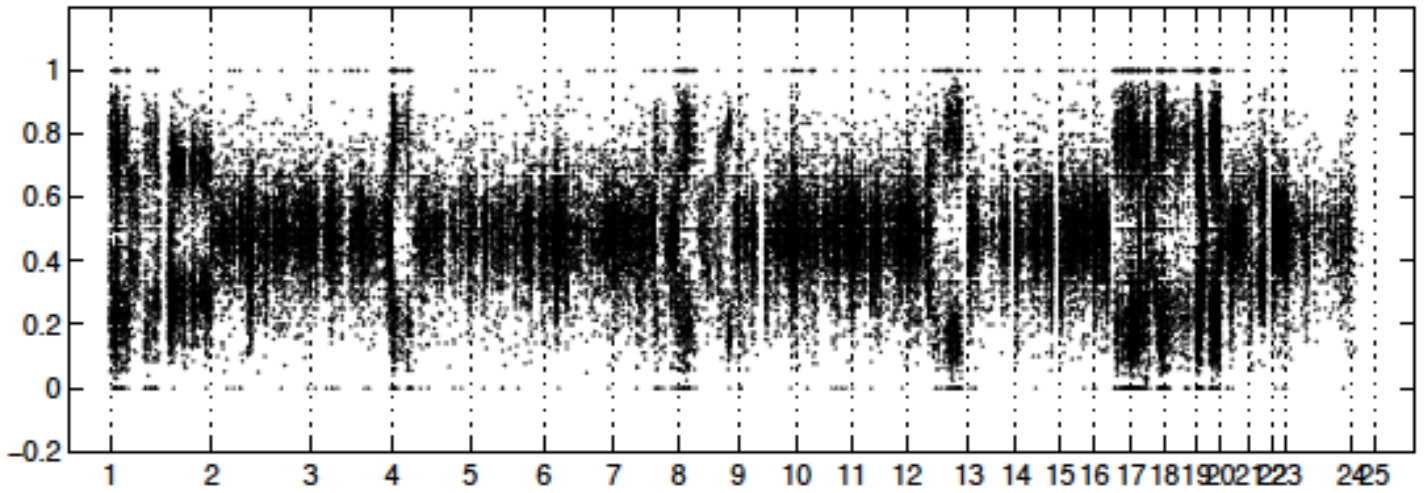

198\_ucsc.edu\_BRCA.IlluminaGA\_DNASeq.Level\_2.2.0.0\_TCGA-A2-A0CX\_W  
germline-het

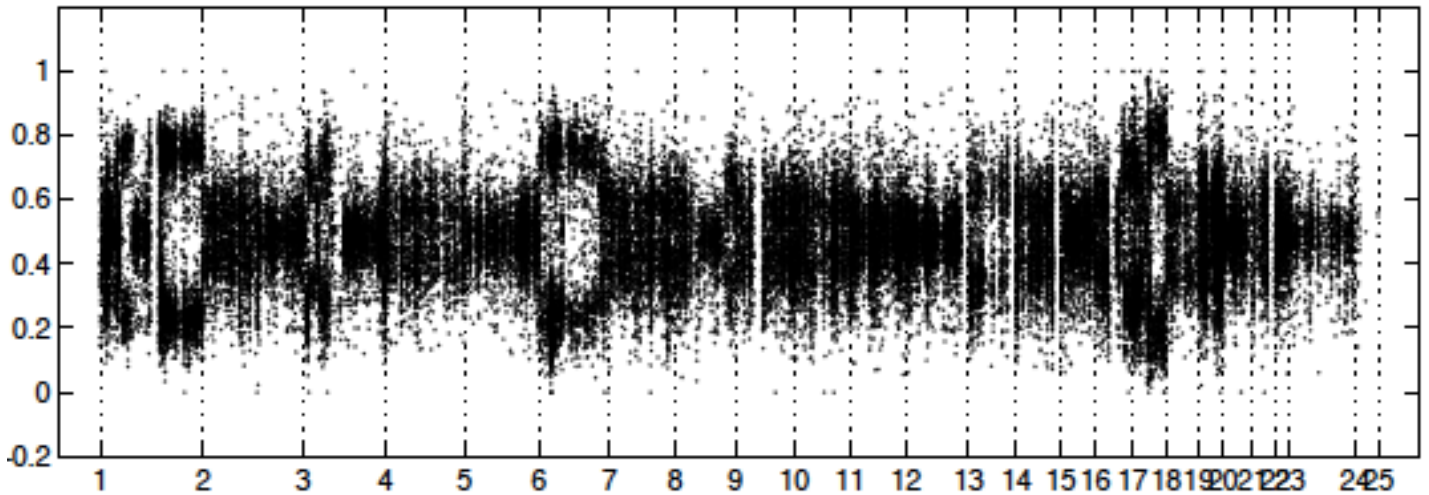

199\_ucsc.edu\_BRCA.IlluminaGA\_DNASeq.Level\_2.5.0.0\_TCGA-AN-A049\_W  
germline-het

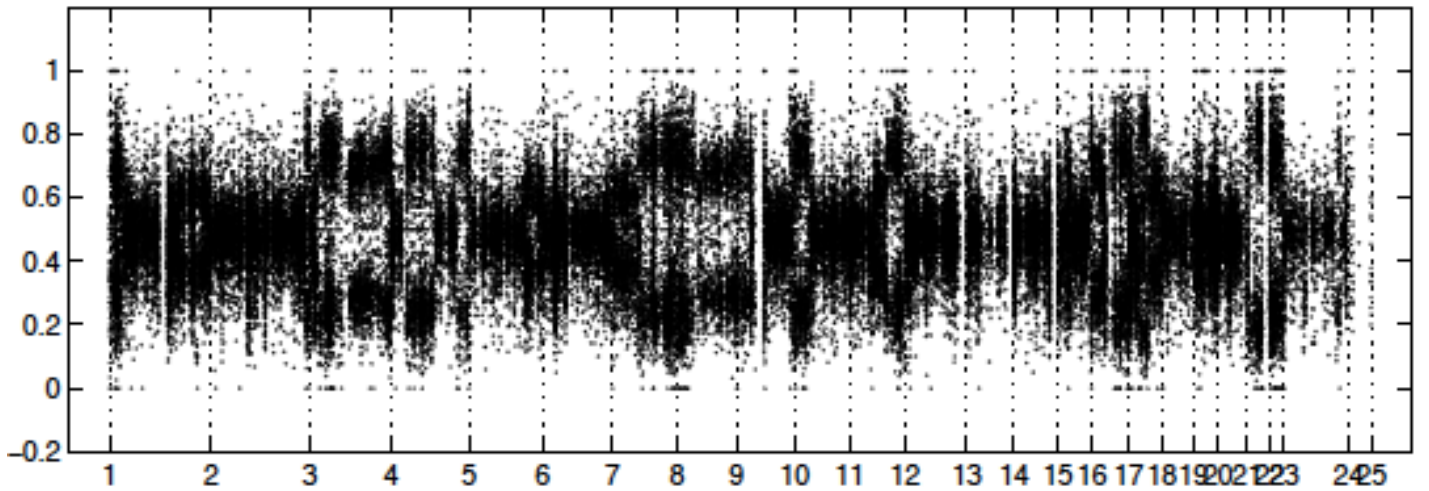

200\_ucsc.edu\_BRCA.IlluminaGA\_DNASeq.Level\_2.6.0.0\_TCGA-AO-A0J9\_W  
germline-het

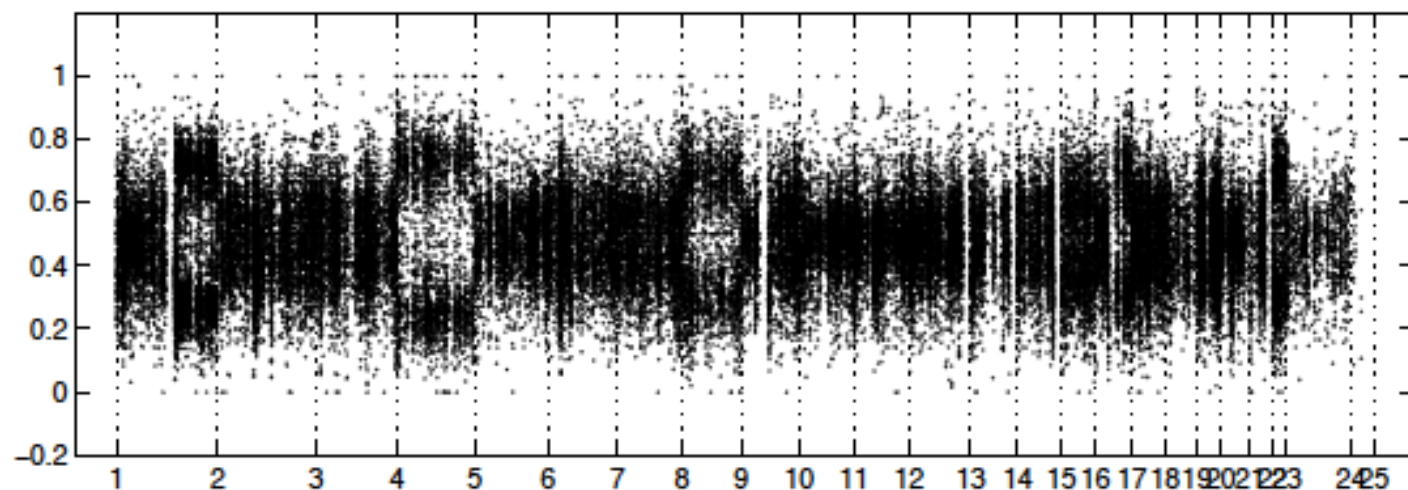

201\_ucsc.edu\_BRCA.IlluminaGA\_DNASeq.Level\_2.13.0.0\_TCGA-E2-A1BD\_D  
germline-het

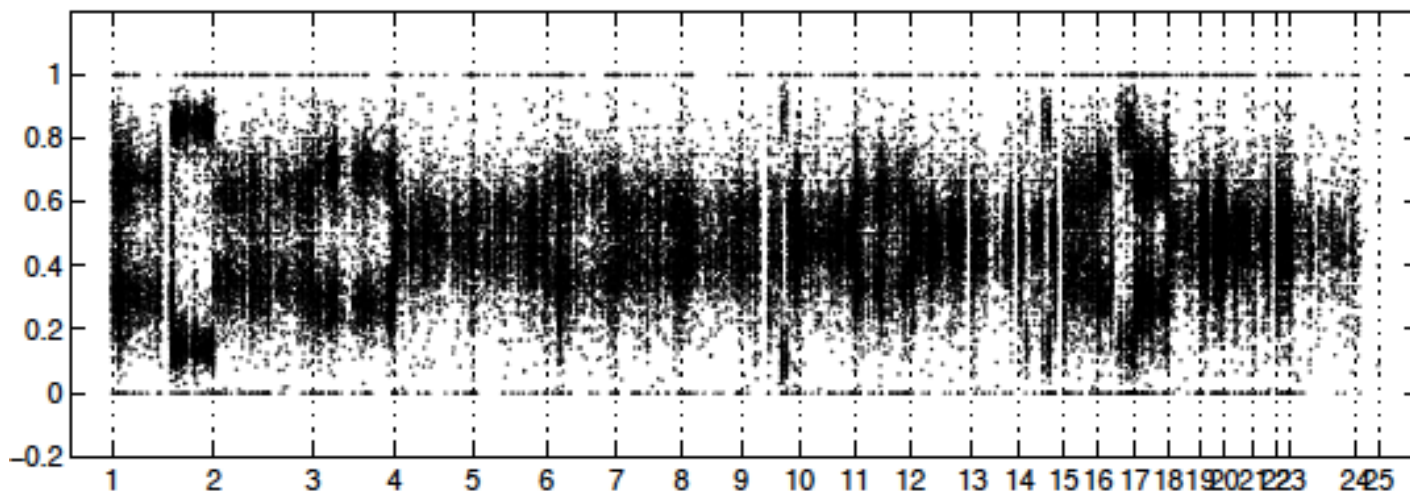

202\_ucsc.edu\_BRCA.IlluminaGA\_DNASeq.Level\_2.4.0.0\_TCGA-A8-A08O\_W  
germline-het

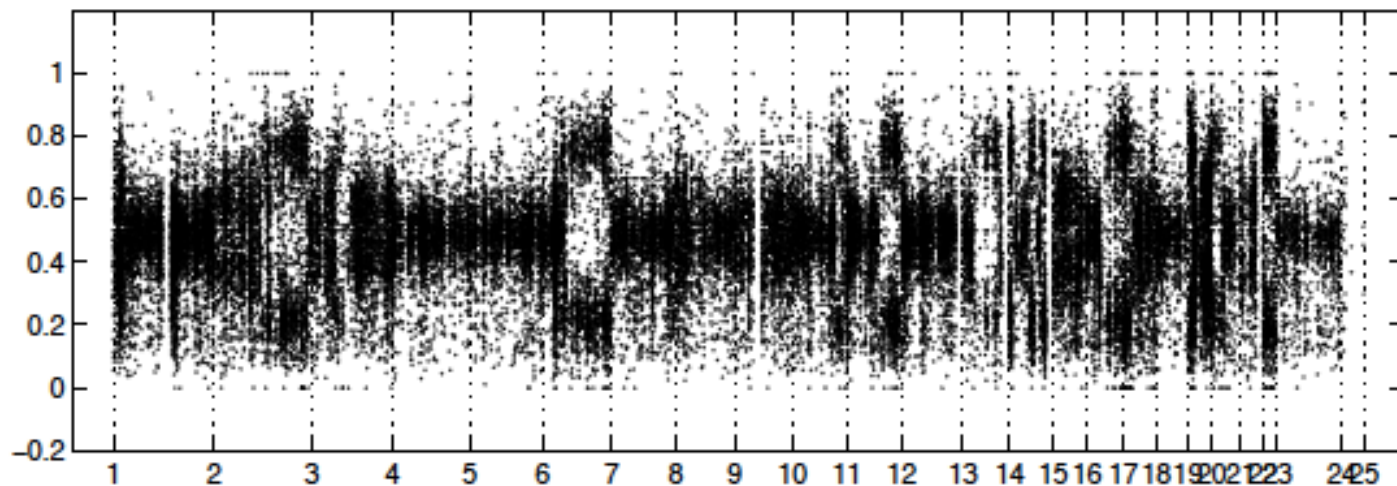

203\_ucsc.edu\_BRCA.IlluminaGA\_DNASeq.Level\_2.13.0.0\_TCGA-E2-A14Z\_D  
germline-het

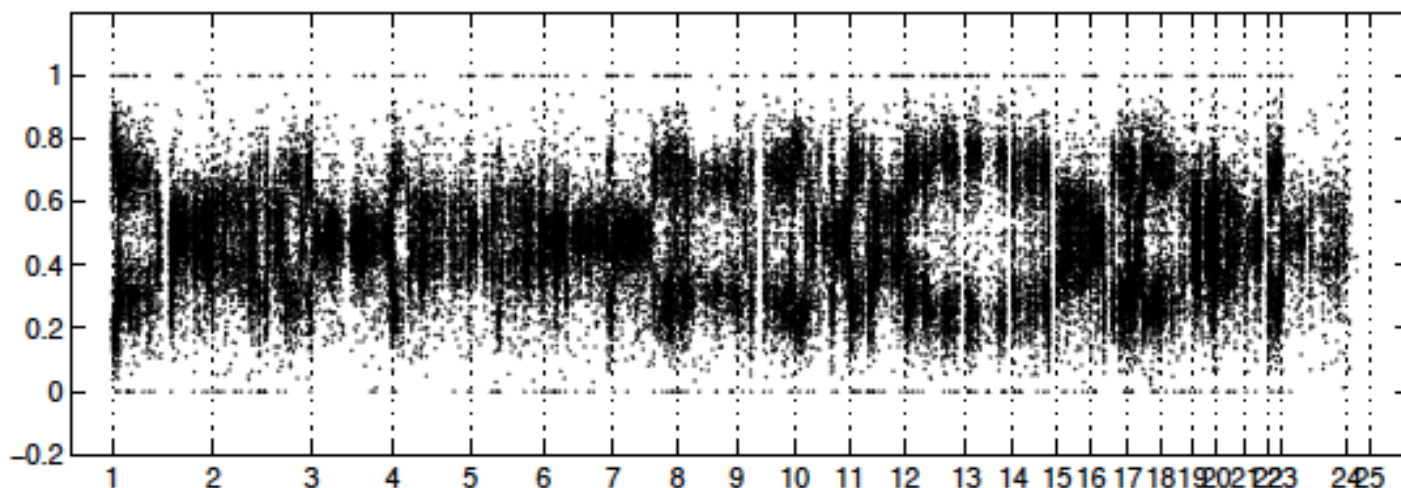

204\_ucsc.edu\_BRCA.IlluminaGA\_DNASeq.Level\_2.10.0.0\_TCGA-BH-A0AY\_W  
germline-het

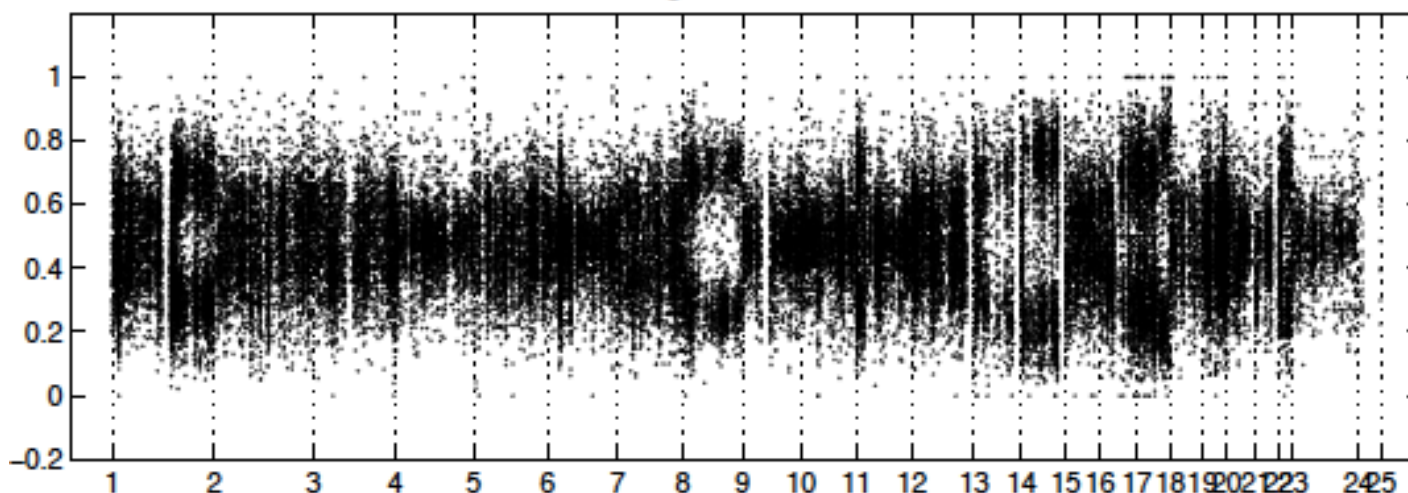

205\_ucsc.edu\_BRCA.IlluminaGA\_DNASeq.Level\_2.3.0.0\_TCGA-A7-A13F\_D  
germline-het

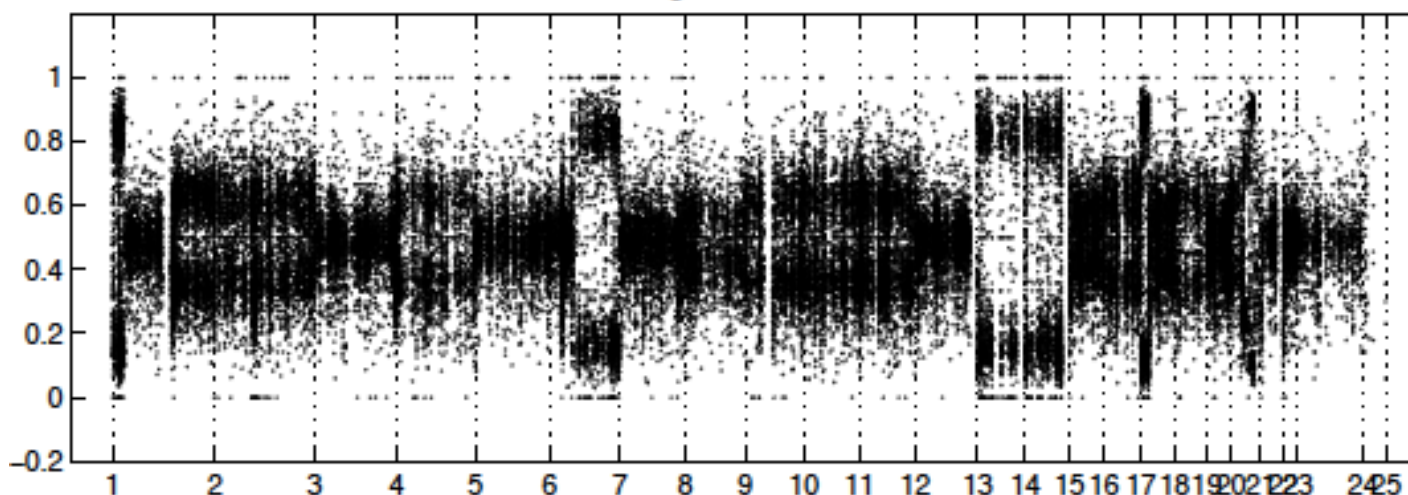

206\_ucsc.edu\_BRCA.IlluminaGA\_DNASeq\_Level\_2.11.0.0\_TCGA-C8-A1HF\_D  
germline-het

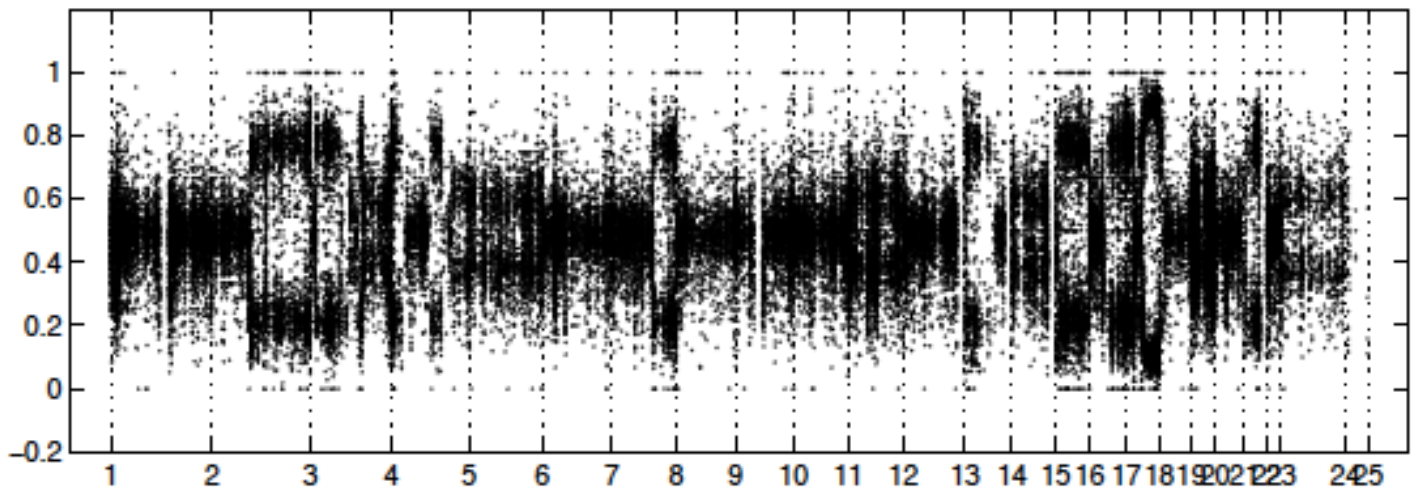

207\_ucsc.edu\_BRCA.IlluminaGA\_DNASeq\_Level\_2.1.0.0\_TCGA-A1-A0SJ\_D  
germline-het

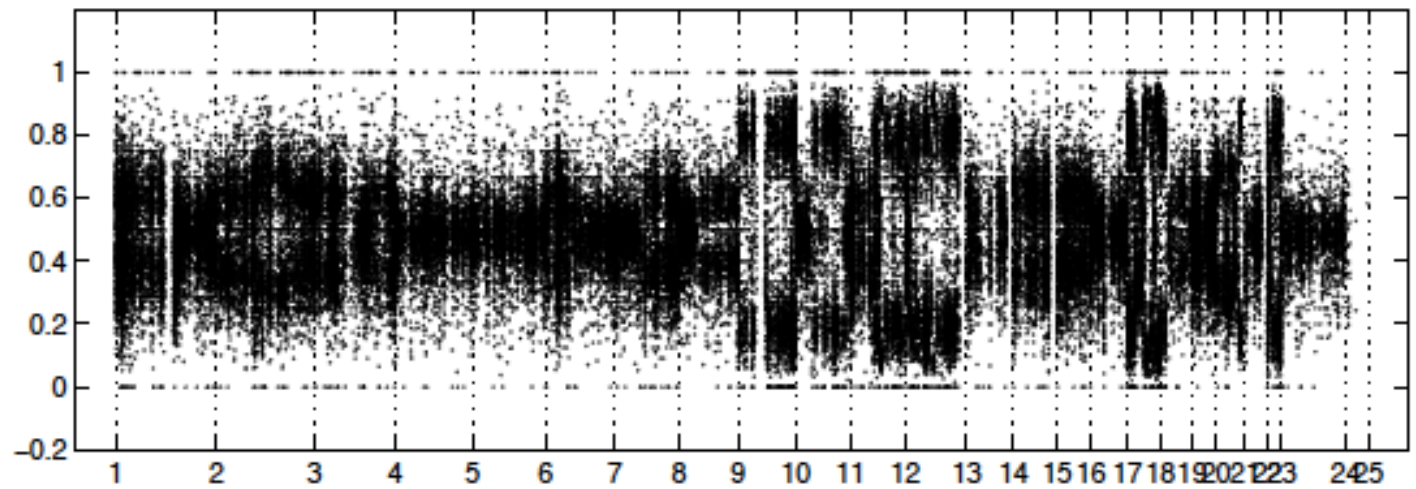

208\_ucsc.edu\_BRCA.IlluminaGA\_DNASeq\_Level\_2.4.0.0\_TCGA-A8-A084\_W  
germline-het

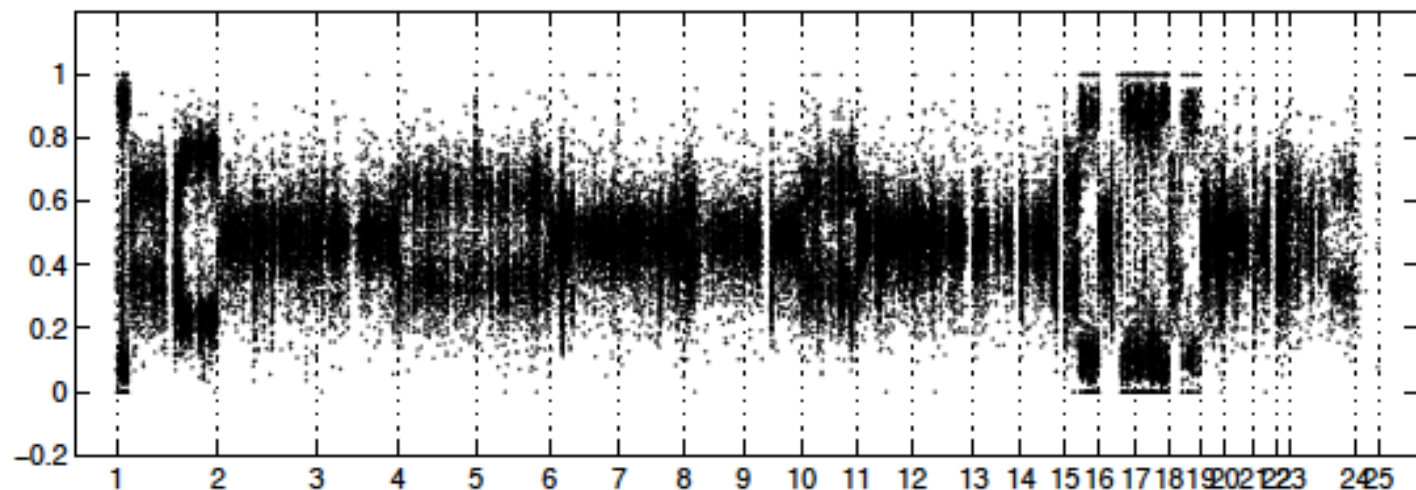

209\_ucsc.edu\_BRCA.IlluminaGA\_DNASeq.Level\_2.4.0.0\_TCGA-A8-A09M\_W  
germline-het

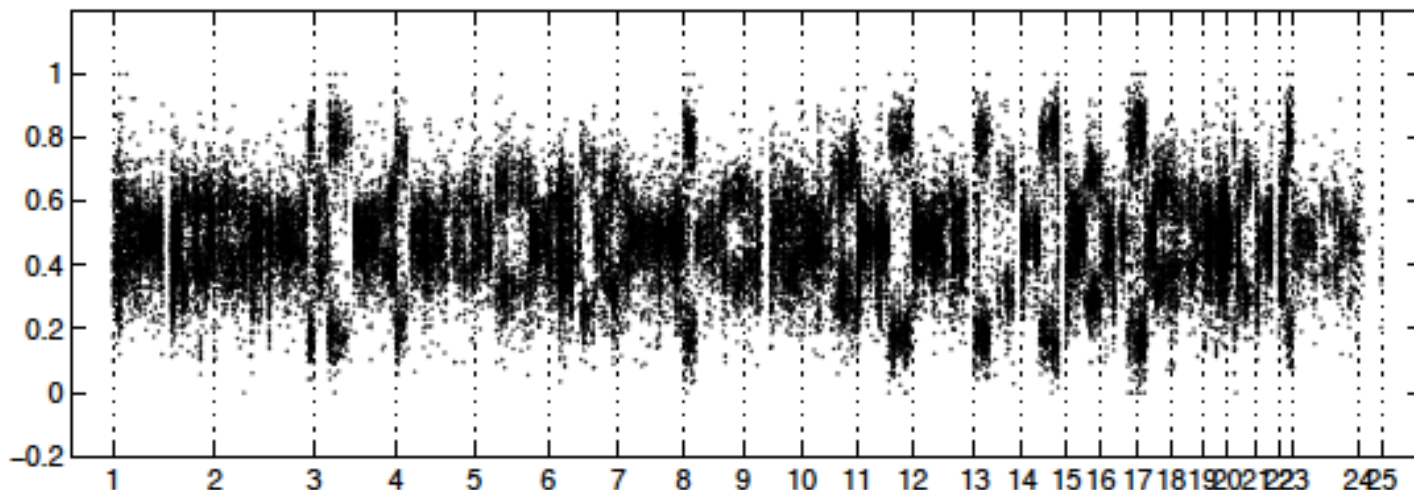

210\_ucsc.edu\_BRCA.IlluminaGA\_DNASeq.Level\_2.5.0.0\_TCGA-AN-A04D\_W  
germline-het

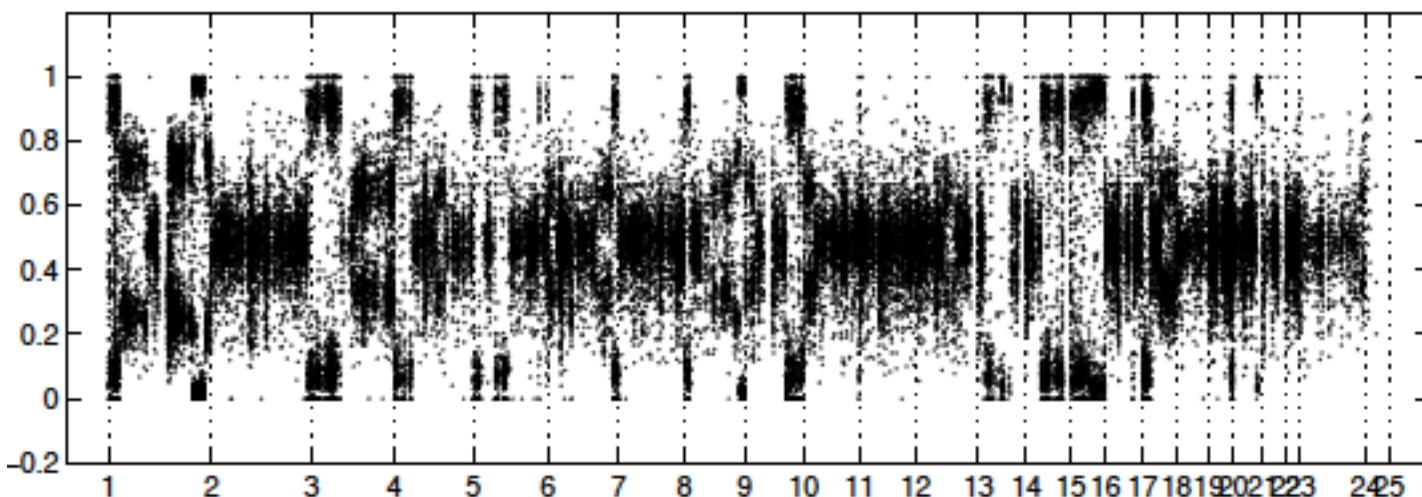

211\_ucsc.edu\_BRCA.IlluminaGA\_DNASeq.Level\_2.4.0.0\_TCGA-A8-A085\_W  
germline-het

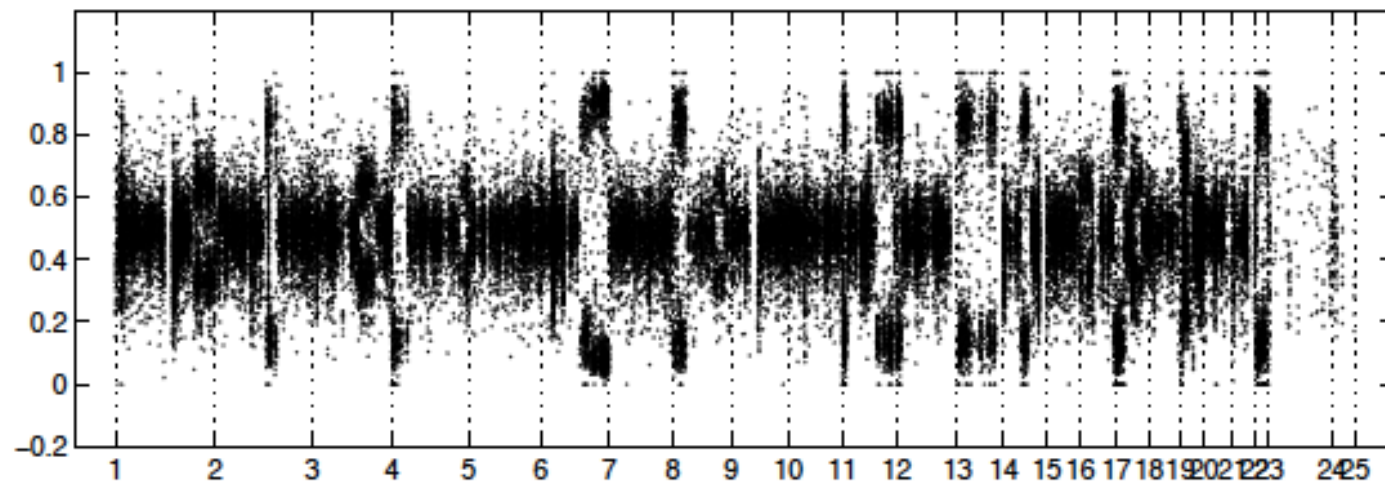



212\_ucsc.edu\_BRCA.IlluminaGA\_DNASeq.Level\_2.13.0.0\_TCGA-E2-A10C\_D  
germline-het

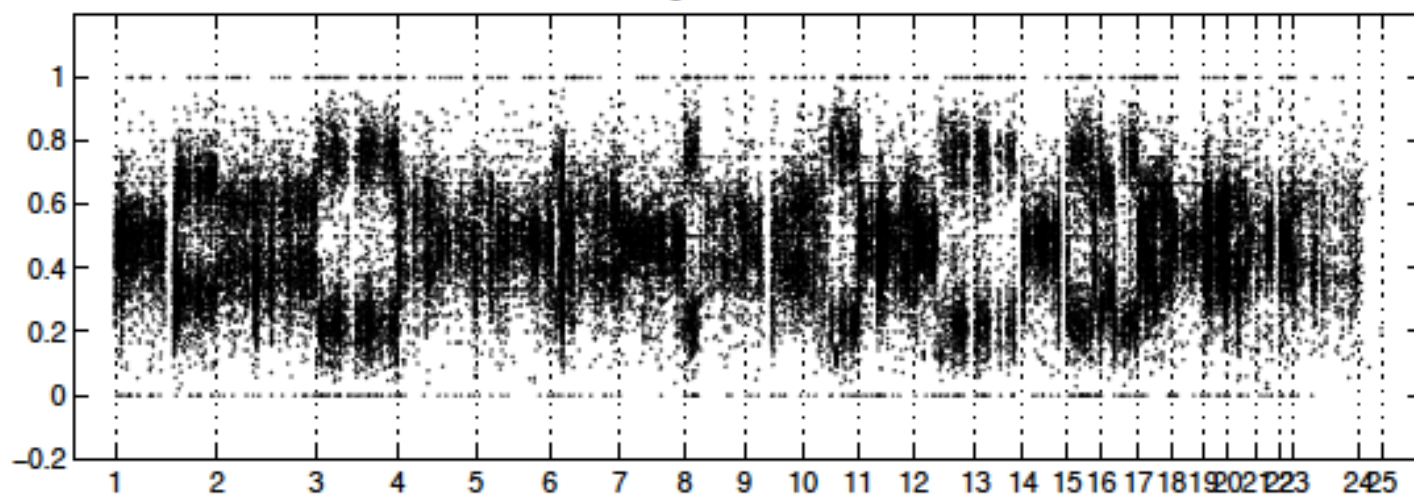

213\_ucsc.edu\_BRCA.IlluminaGA\_DNASeq.Level\_2.4.0.0\_TCGA-A8-A091\_W  
germline-het

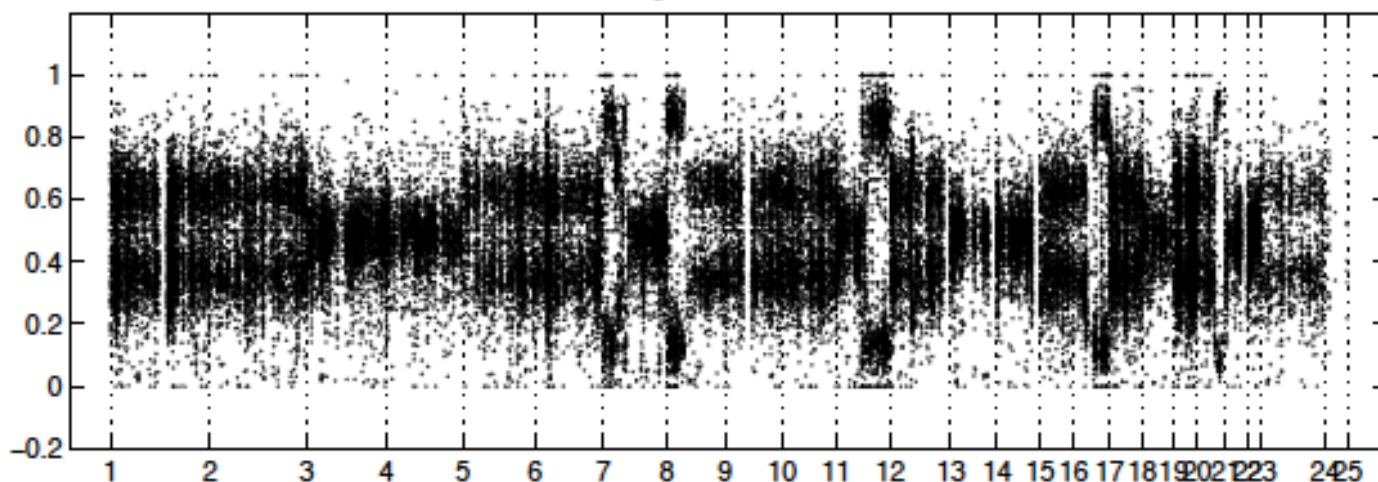

214\_ucsc.edu\_BRCA.IlluminaGA\_DNASeq.Level\_2.8.0.0\_TCGA-AR-A0TW\_D  
germline-het

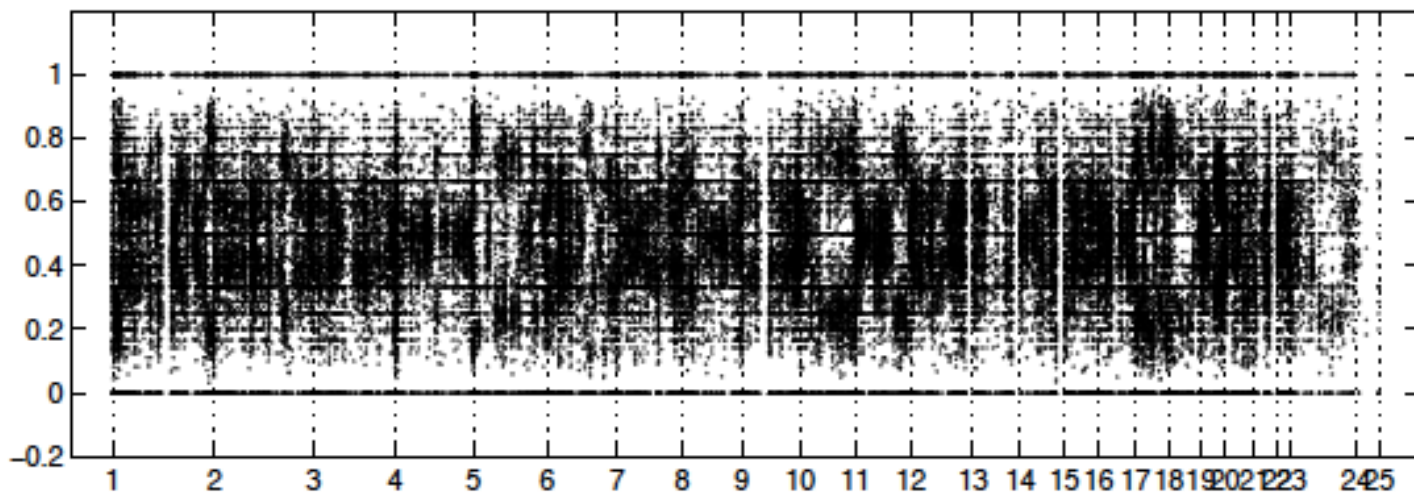

215\_ucsc.edu\_BRCA.IlluminaGA\_DNASeq.Level\_2.4.0.0\_TCGA-A8-A090\_W  
germline-het

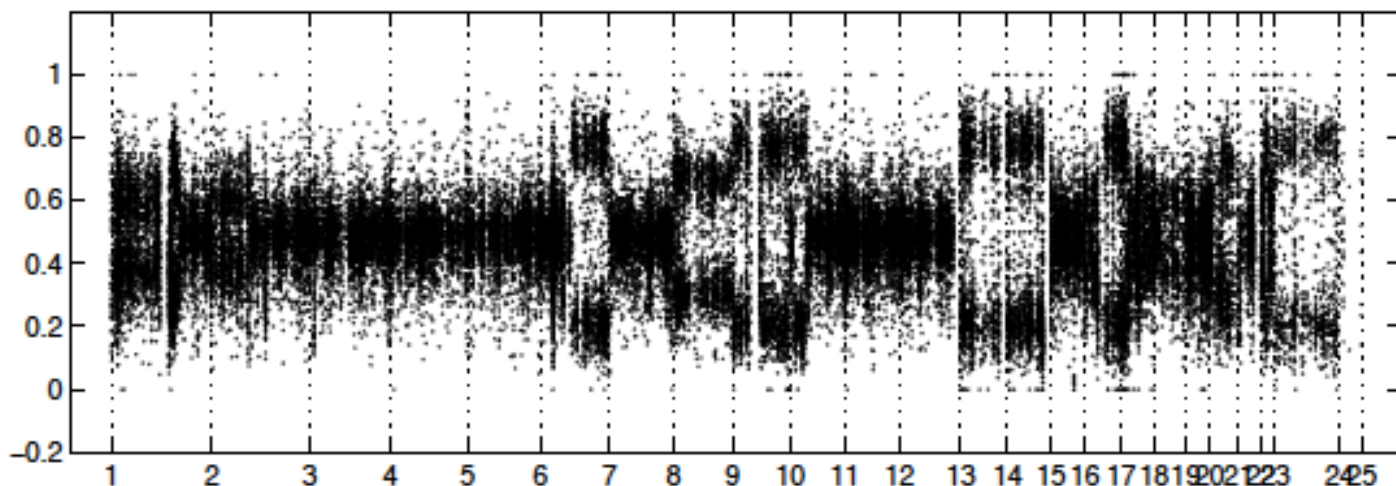

216\_ucsc.edu\_BRCA.IlluminaGA\_DNASeq.Level\_2.4.0.0\_TCGA-A8-A094\_W  
germline-het

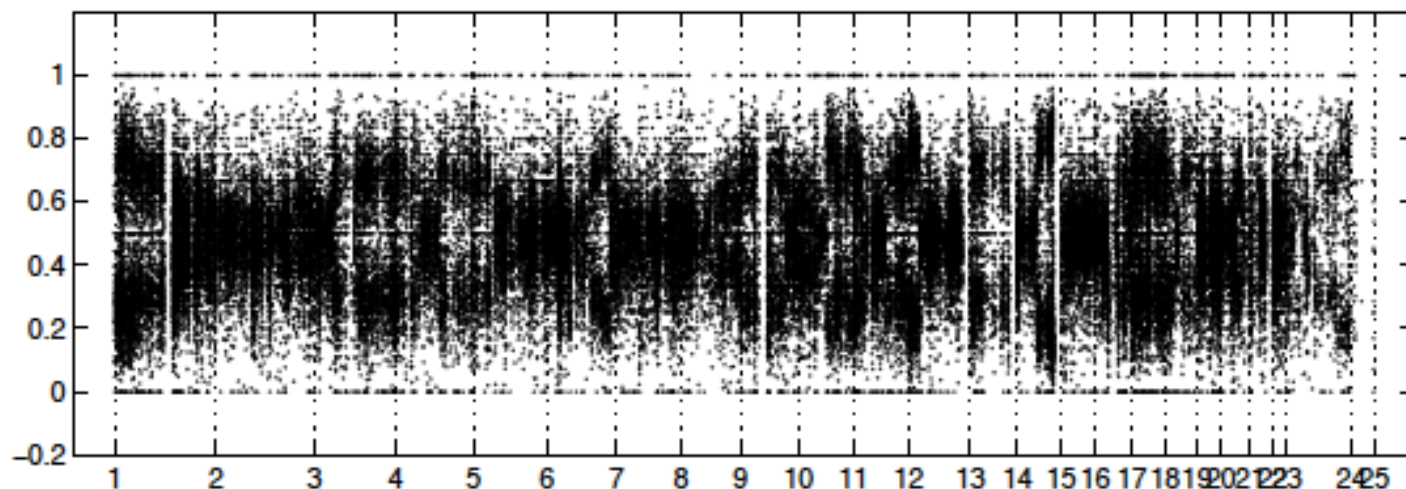

217\_ucsc.edu\_BRCA.IlluminaGA\_DNASeq.Level\_2.10.0.0\_TCGA-BH-A0BZ\_D  
germline-het

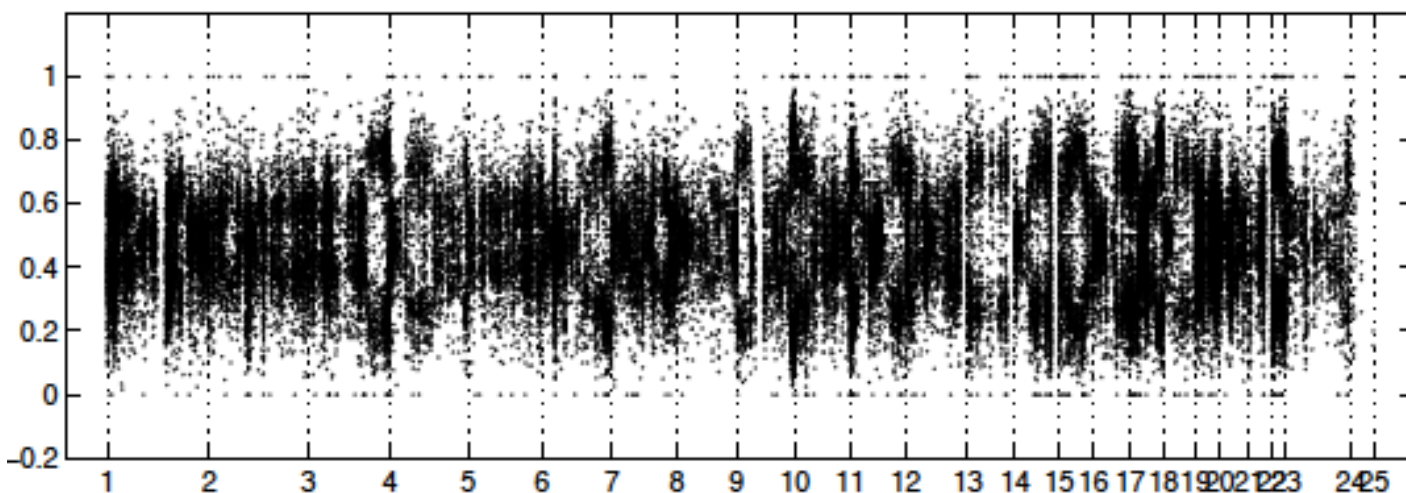

218\_ucsc.edu\_BRCA.IlluminaGA\_DNASeq.Level\_2.2.0.0\_TCGA-A2-A0EU\_W  
germline-het

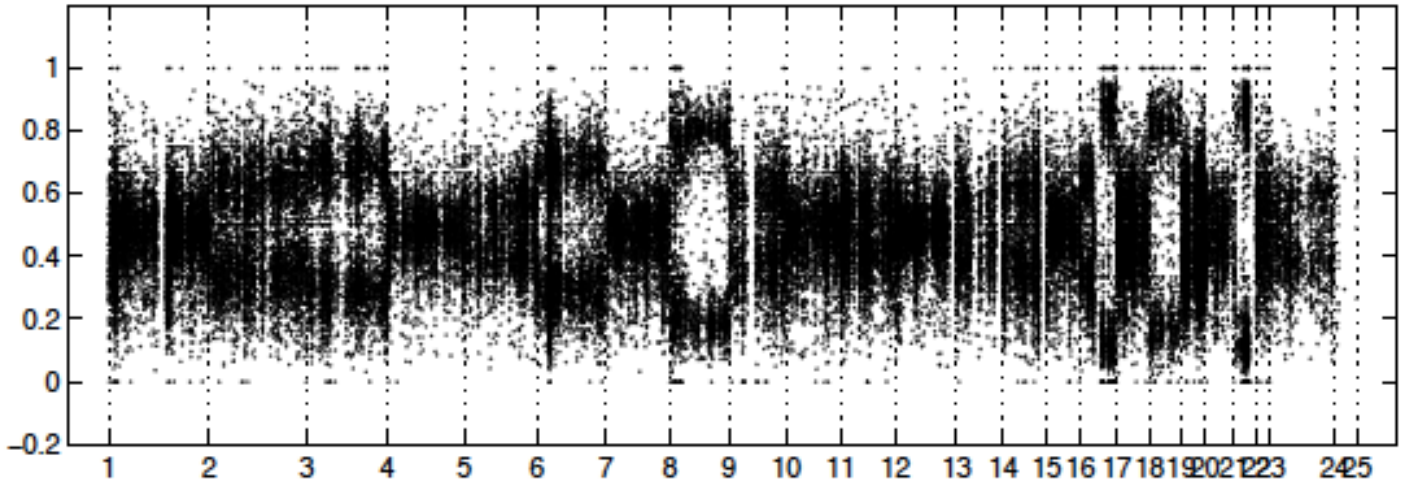

219\_ucsc.edu\_BRCA.IlluminaGA\_DNASeq.Level\_2.10.0.0\_TCGA-BH-A0E6\_W  
germline-het

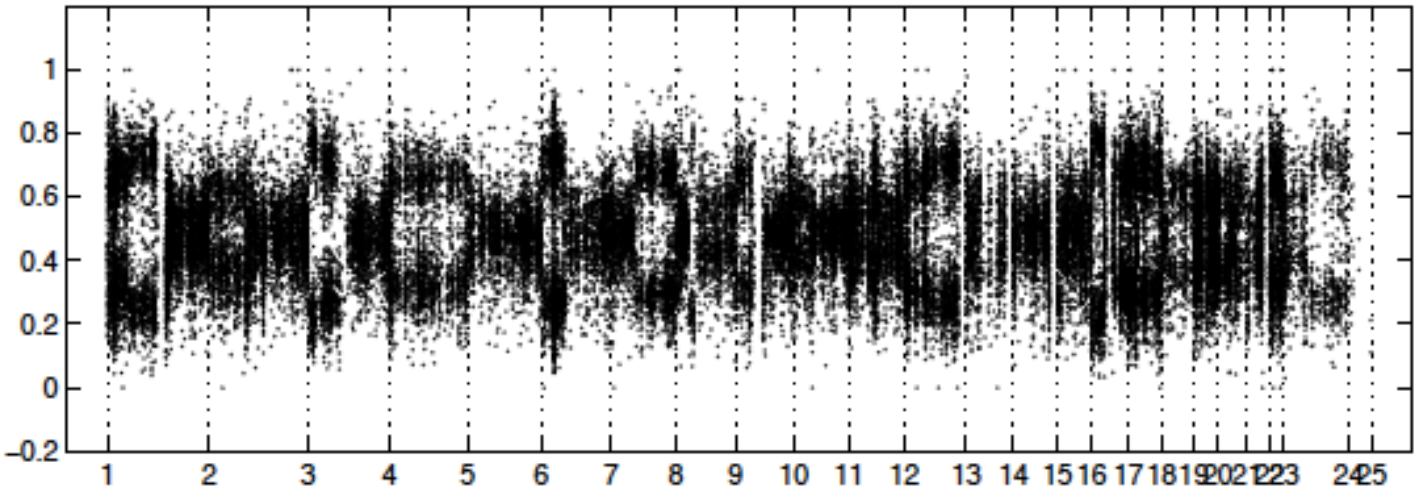

220\_ucsc.edu\_BRCA.IlluminaGA\_DNASeq.Level\_2.4.0.0\_TCGA-A8-A0AB\_W  
germline-het

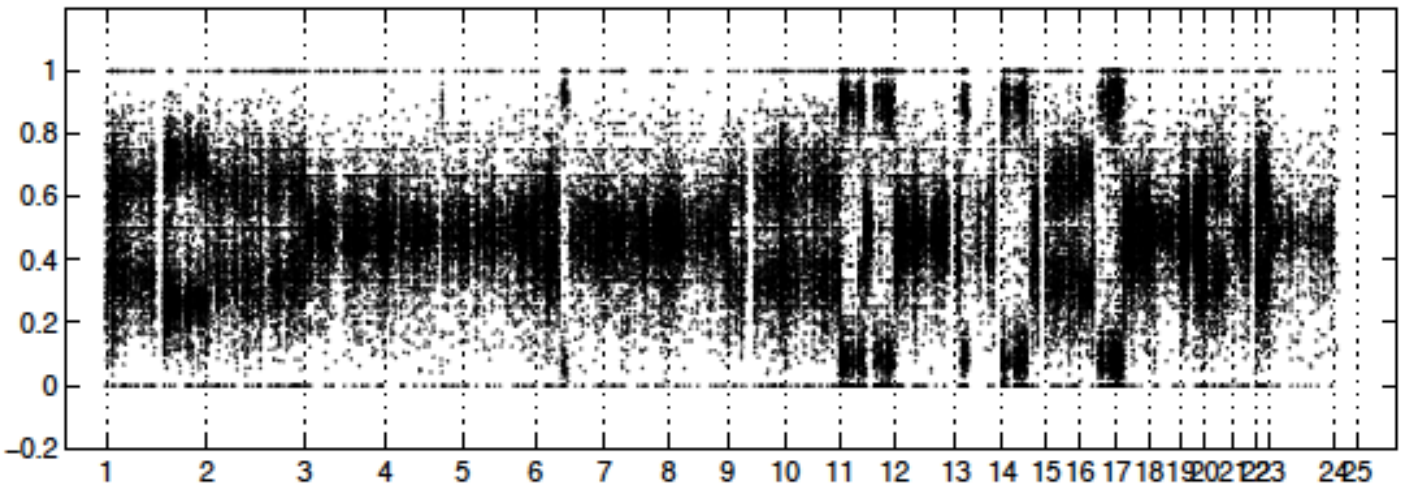

221\_ucsc.edu\_BRCA.IlluminaGA\_DNASeq.Level\_2.11.0.0\_TCGA-C8-A12P\_D  
germline-het

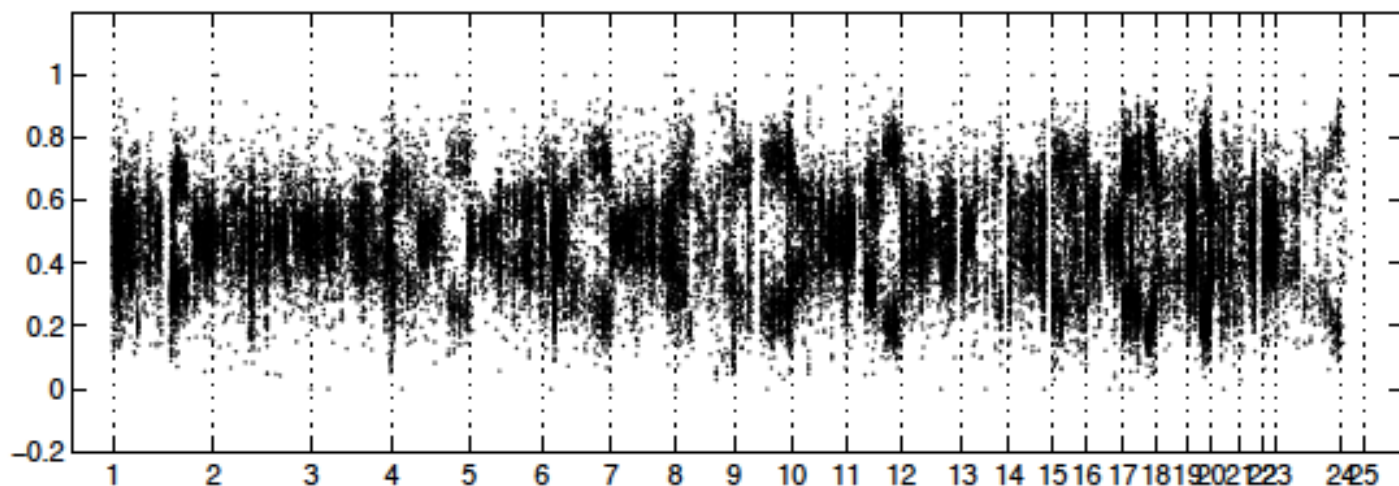

222\_ucsc.edu\_BRCA.IlluminaGA\_DNASeq.Level\_2.13.0.0\_TCGA-E2-A14T\_D  
germline-het

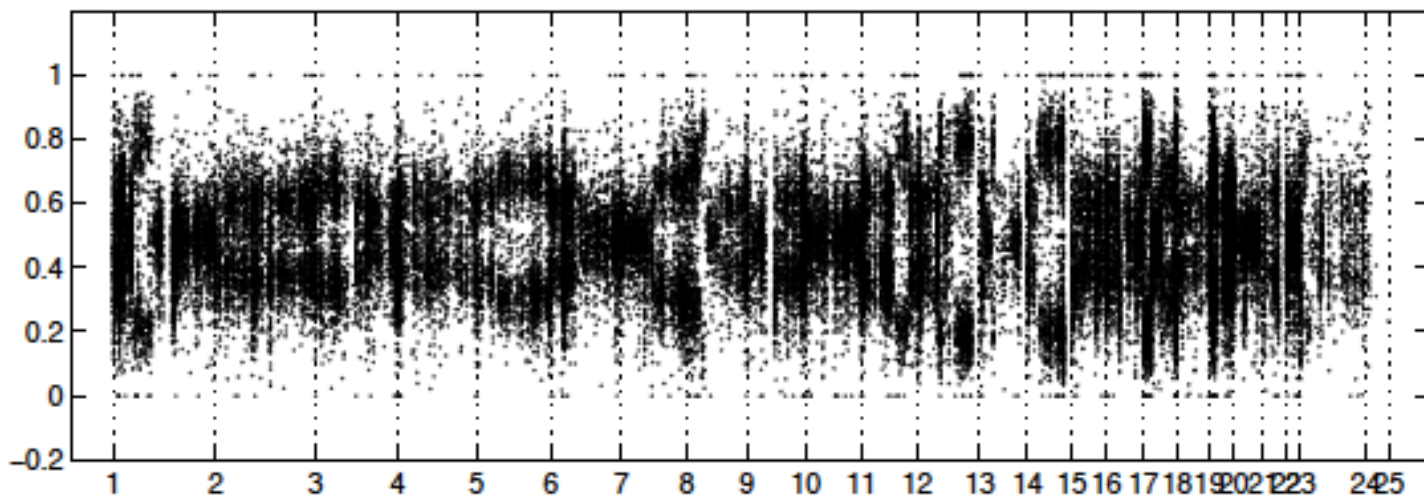

223\_ucsc.edu\_BRCA.IlluminaGA\_DNASeq.Level\_2.5.0.0\_TCGA-AN-A0FD\_W  
germline-het

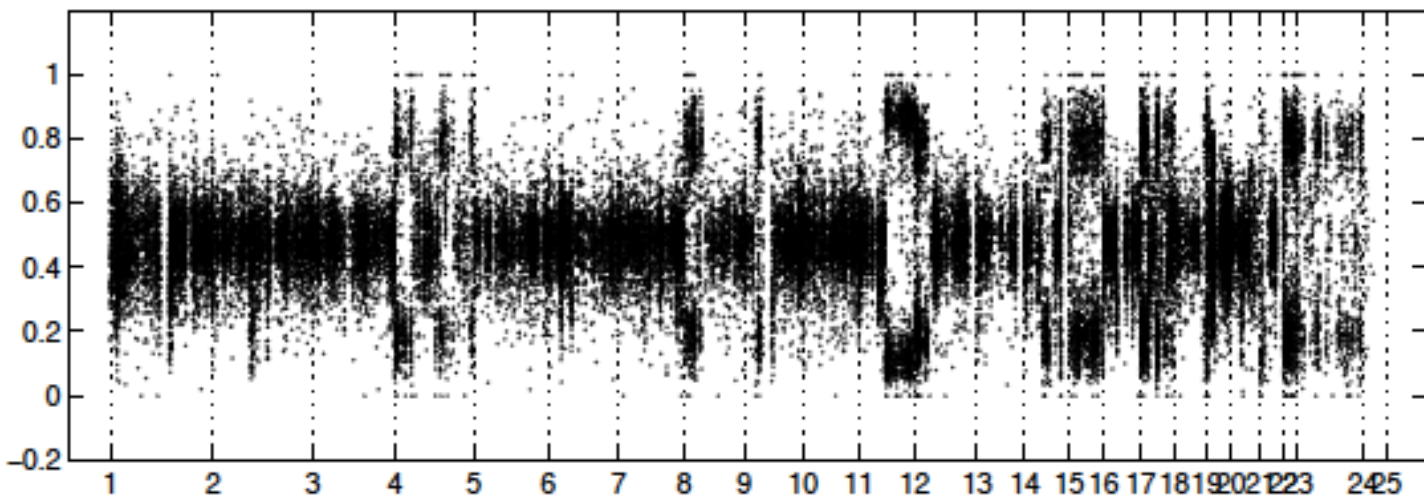

224\_ucsc.edu\_BRCA.IlluminaGA\_DNASeq.Level\_2.10.0.0\_TCGA-BH-A18N\_D  
germline-het

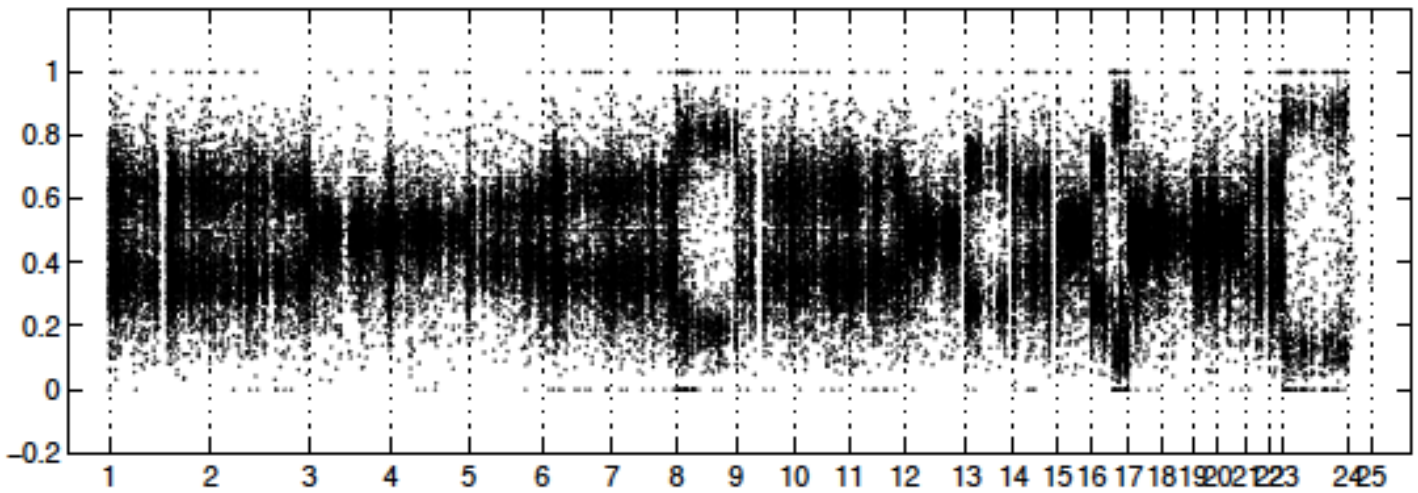

225\_ucsc.edu\_BRCA.IlluminaGA\_DNASeq.Level\_2.9.0.0\_TCGA-B6-A0IK\_W  
germline-het

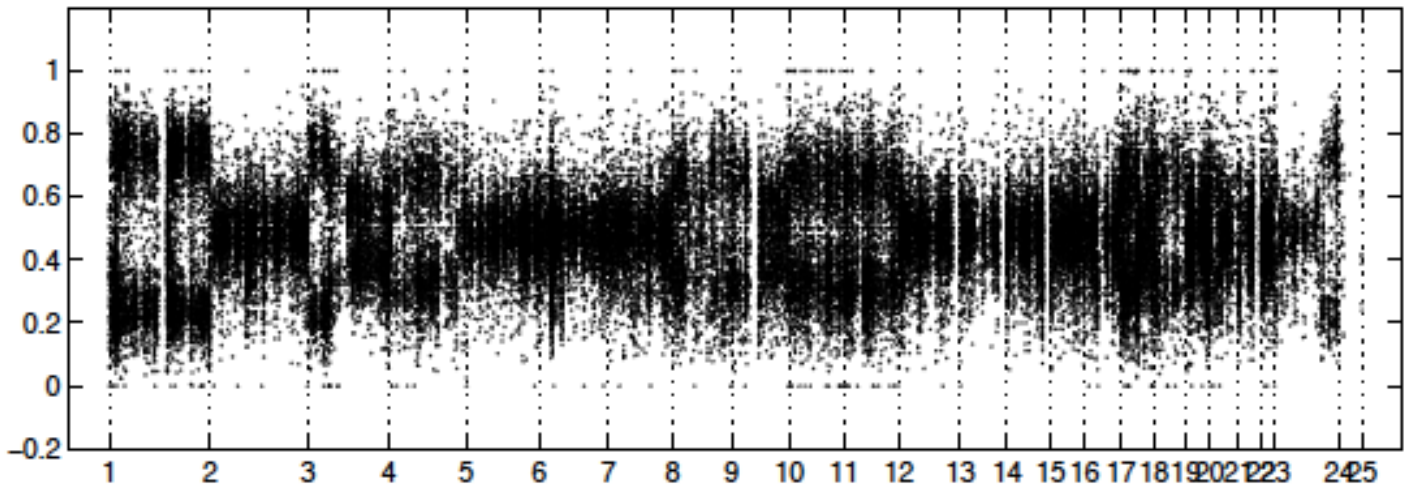

226\_ucsc.edu\_BRCA.IlluminaGA\_DNASeq.Level\_2.2.0.0\_TCGA-A2-A0EV\_W  
germline-het

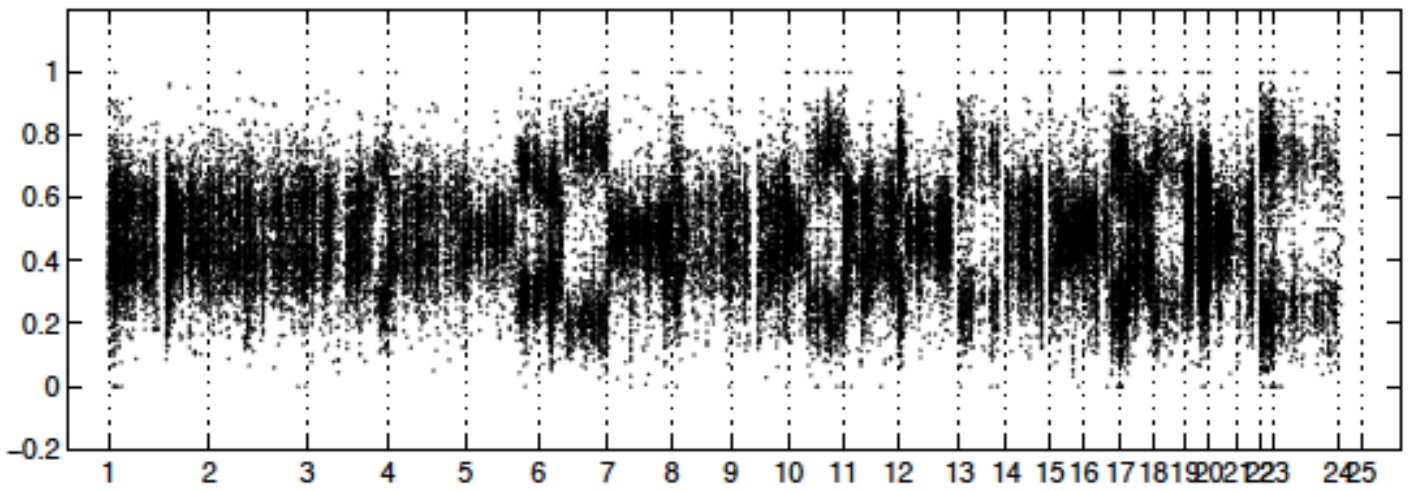

227\_ucsc.edu\_BRCA.IlluminaGA\_DNASeq.Level\_2.11.0.0\_TCGA-C8-A137\_D  
germline-het

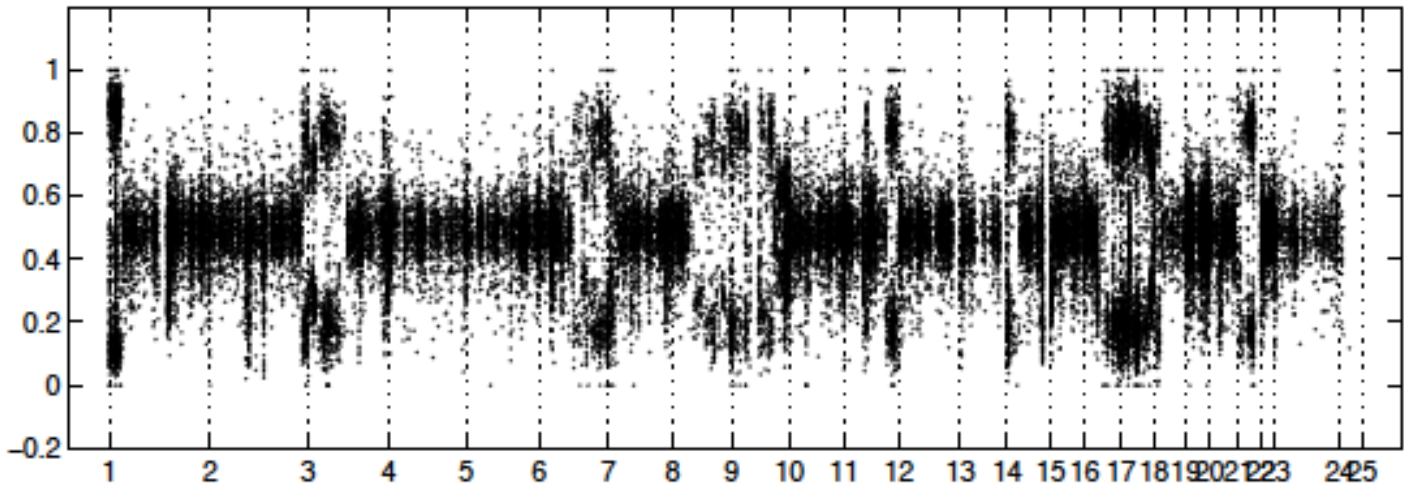

228\_ucsc.edu\_BRCA.IlluminaGA\_DNASeq.Level\_2.13.0.0\_TCGA-E2-A15M\_D  
germline-het

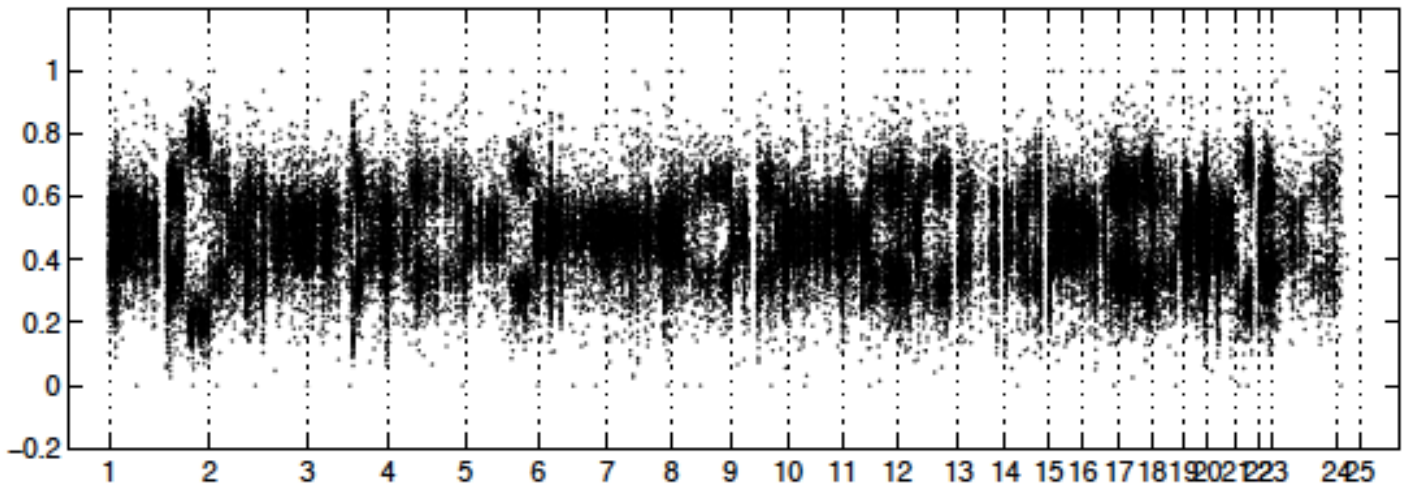

229\_ucsc.edu\_BRCA.IlluminaGA\_DNASeq.Level\_2.10.0.0\_TCGA-BH-A0H0\_W  
germline-het

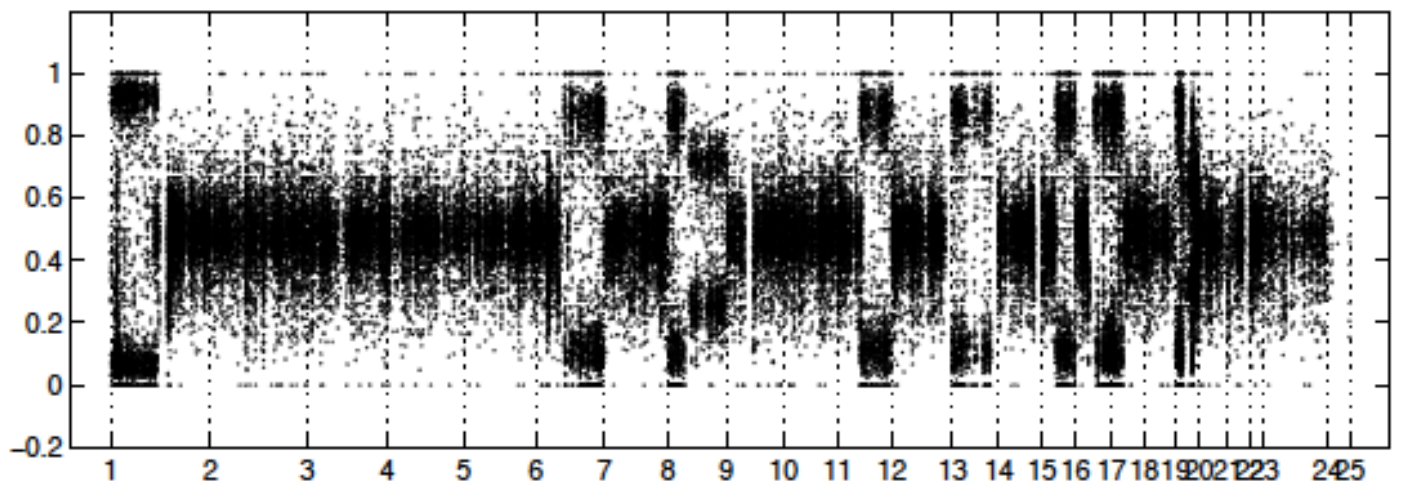

230\_ucsc.edu\_BRCA.IlluminaGA\_DNASeq.Level\_2.13.0.0\_TCGA-E2-A14V\_D  
germline-het

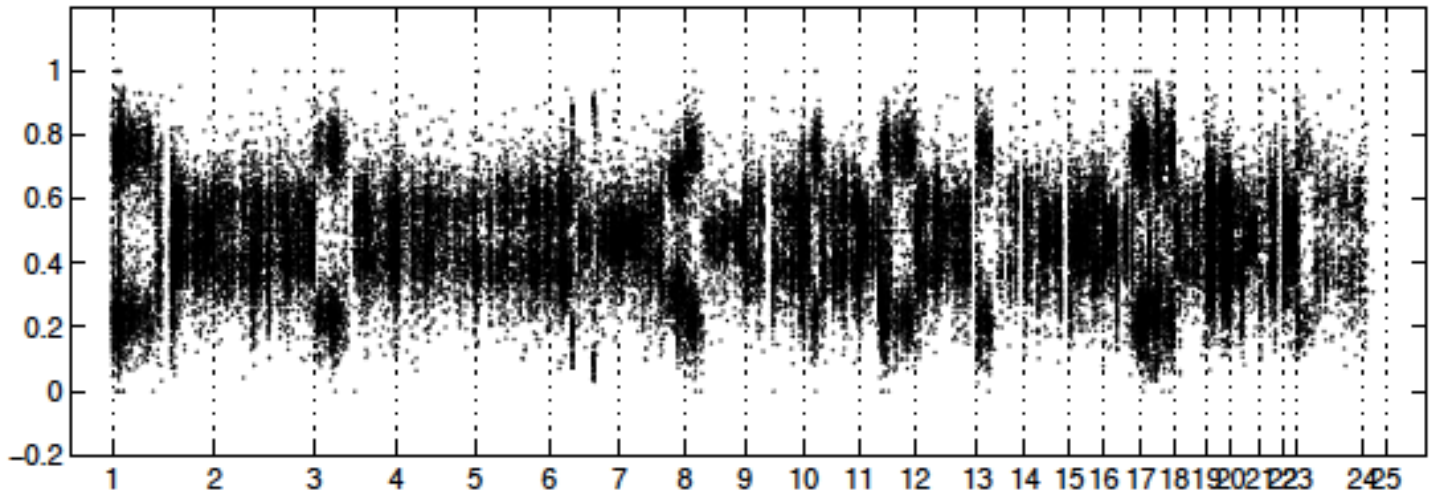

231\_ucsc.edu\_BRCA.IlluminaGA\_DNASeq.Level\_2.4.0.0\_TCGA-A8-A07I\_W  
germline-het

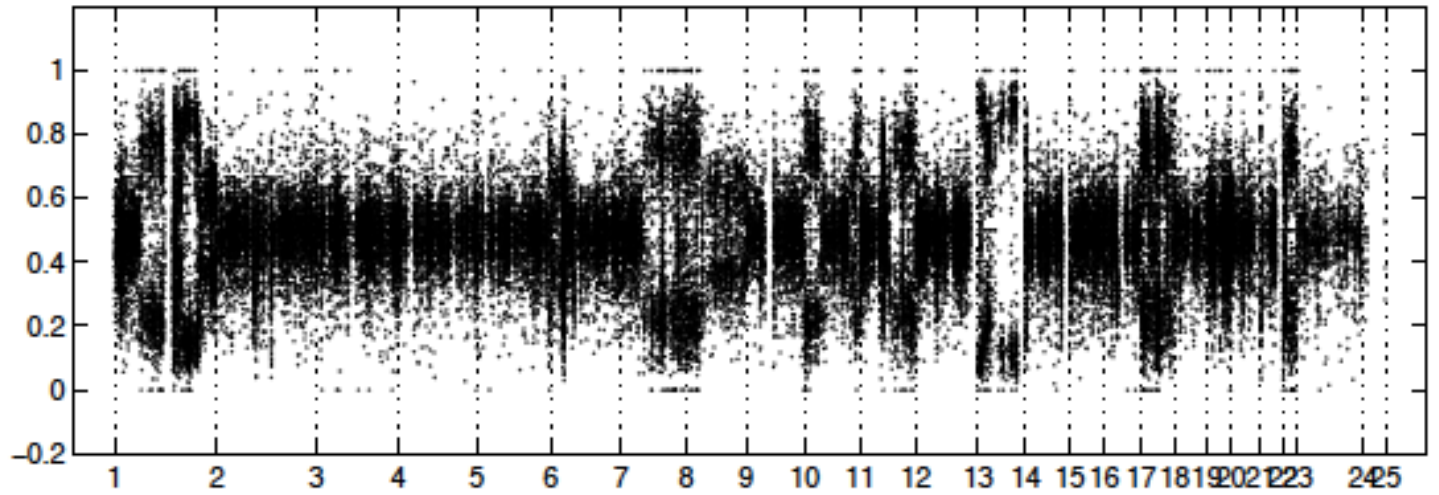

232\_ucsc.edu\_BRCA.IlluminaGA\_DNASeq.Level\_2.6.0.0\_TCGA-AO-A03L\_W  
germline-het

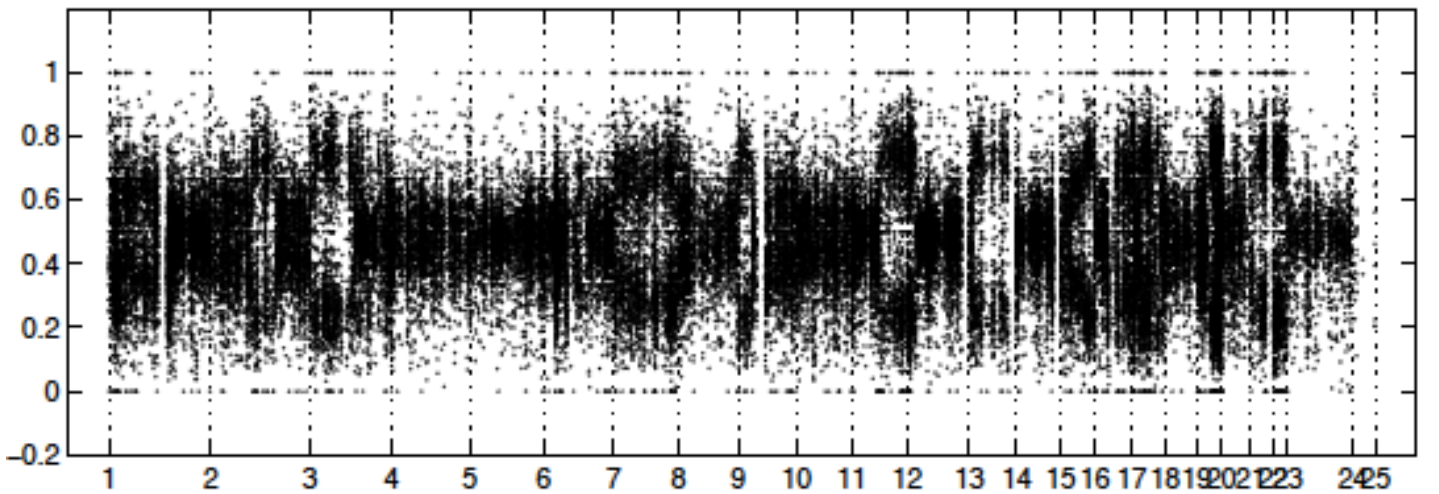

233\_ucsc.edu\_BRCA.IlluminaGA\_DNASeq.Level\_2.5.0.0\_TCGA-AN-A041\_W  
germline-het

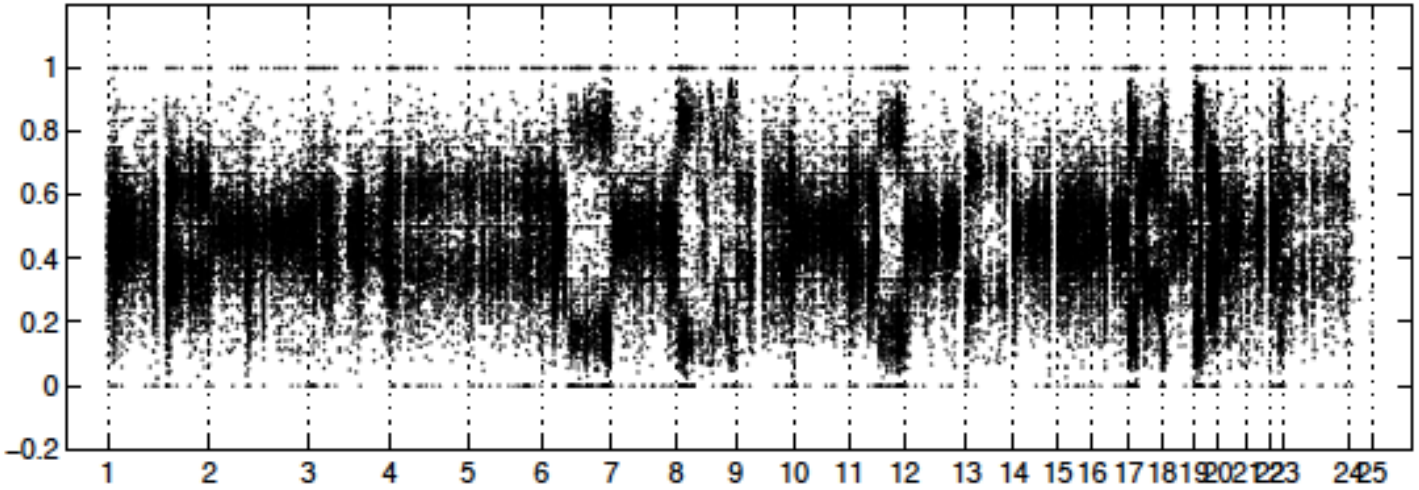

234\_ucsc.edu\_BRCA.IlluminaGA\_DNASeq.Level\_2.10.0.0\_TCGA-BH-A0HL\_W  
germline-het

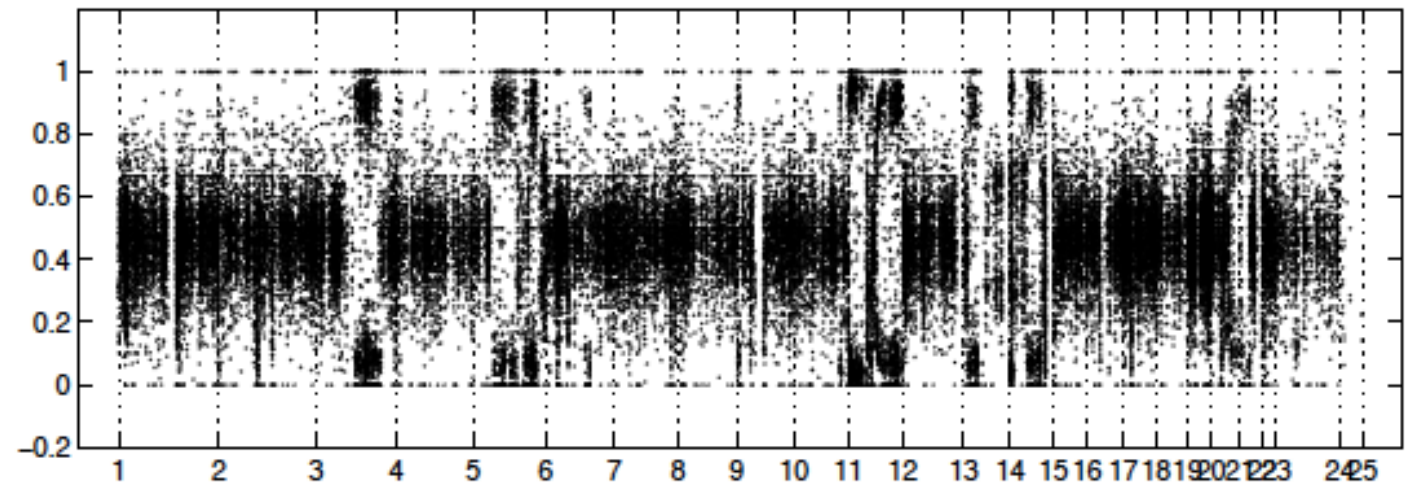

235\_ucsc.edu\_BRCA.IlluminaGA\_DNASeq.Level\_2.10.0.0\_TCGA-BH-A0HW\_W  
germline-het

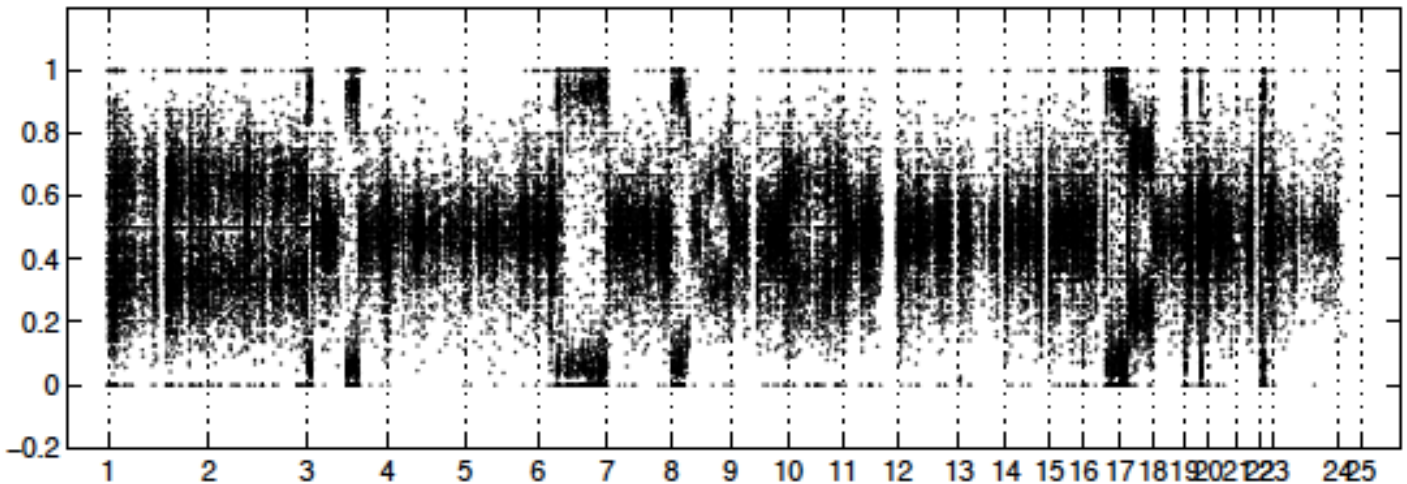



236\_ucsc.edu\_BRCA.IlluminaGA\_DNASeq.Level\_2.11.0.0\_TCGA-C8-A12X\_D  
germline-het

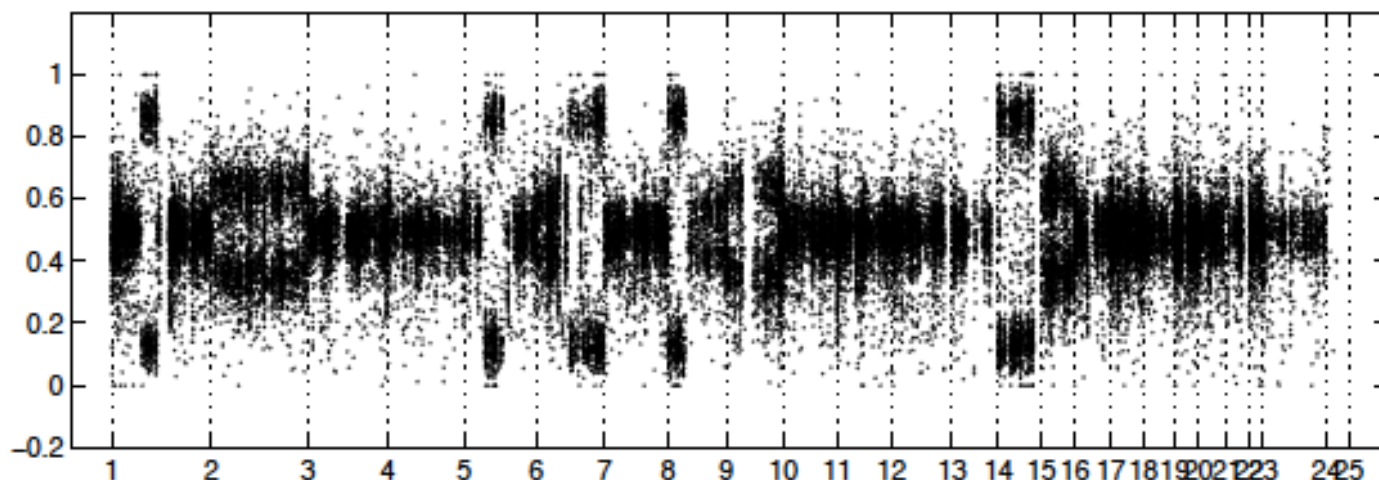

237\_ucsc.edu\_BRCA.IlluminaGA\_DNASeq.Level\_2.10.0.0\_TCGA-BH-A0EE\_W  
germline-het

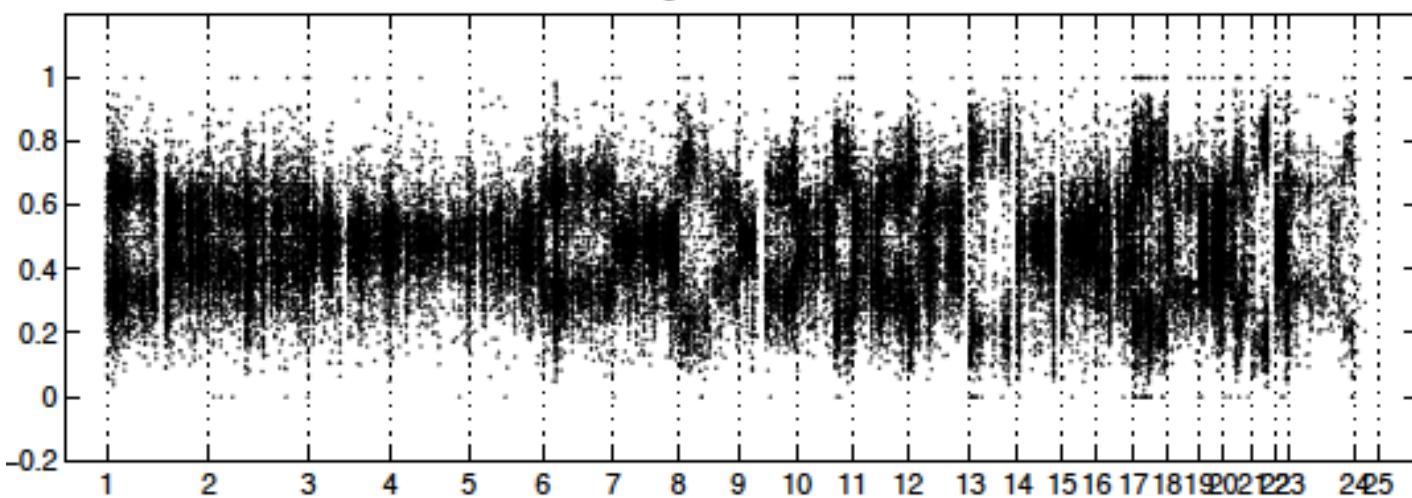

238\_ucsc.edu\_BRCA.IlluminaGA\_DNASeq.Level\_2.4.0.0\_TCGA-A8-A07P\_W  
germline-het

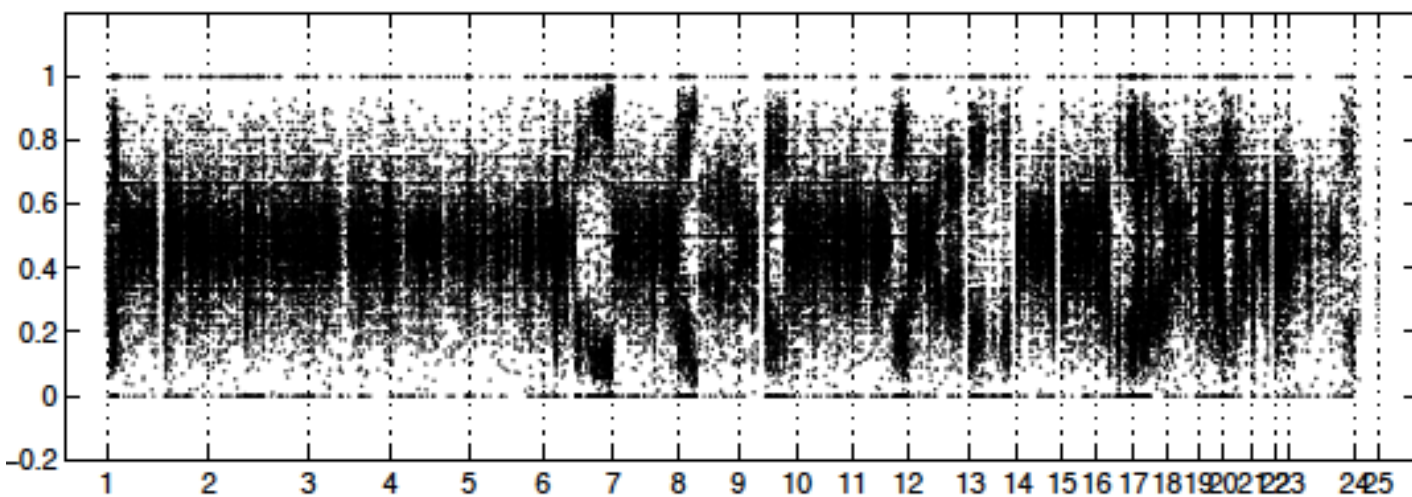

239\_ucsc.edu\_BRCA.IlluminaGA\_DNASeq.Level\_2.9.0.0\_TCGA-B6-A0WX\_D  
germline-het

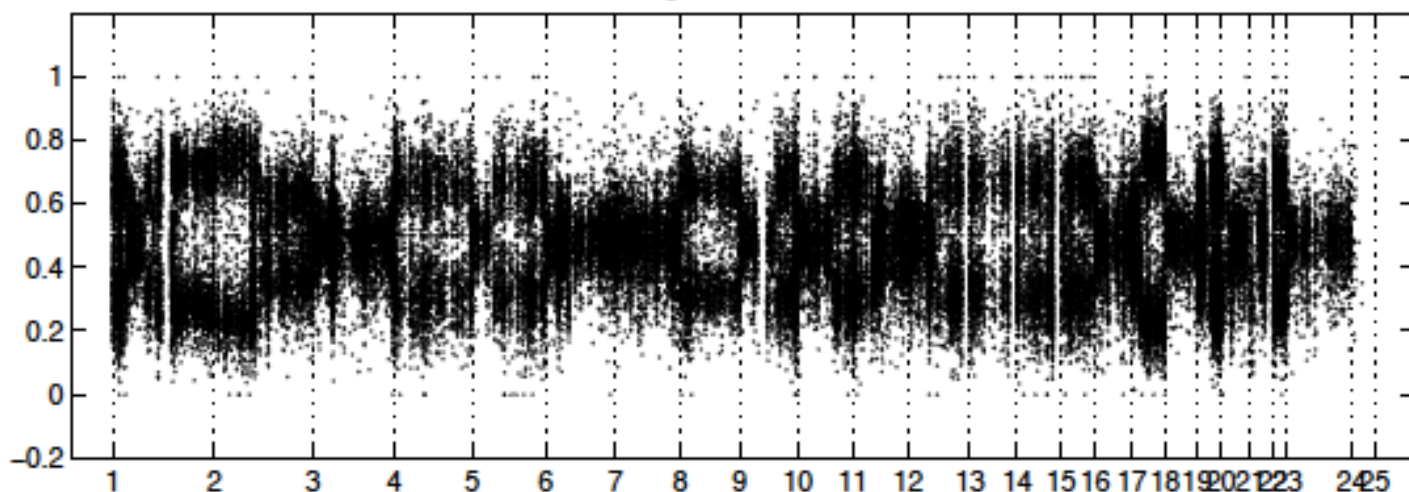

240\_ucsc.edu\_BRCA.IlluminaGA\_DNASeq.Level\_2.13.0.0\_TCGA-E2-A152\_D  
germline-het

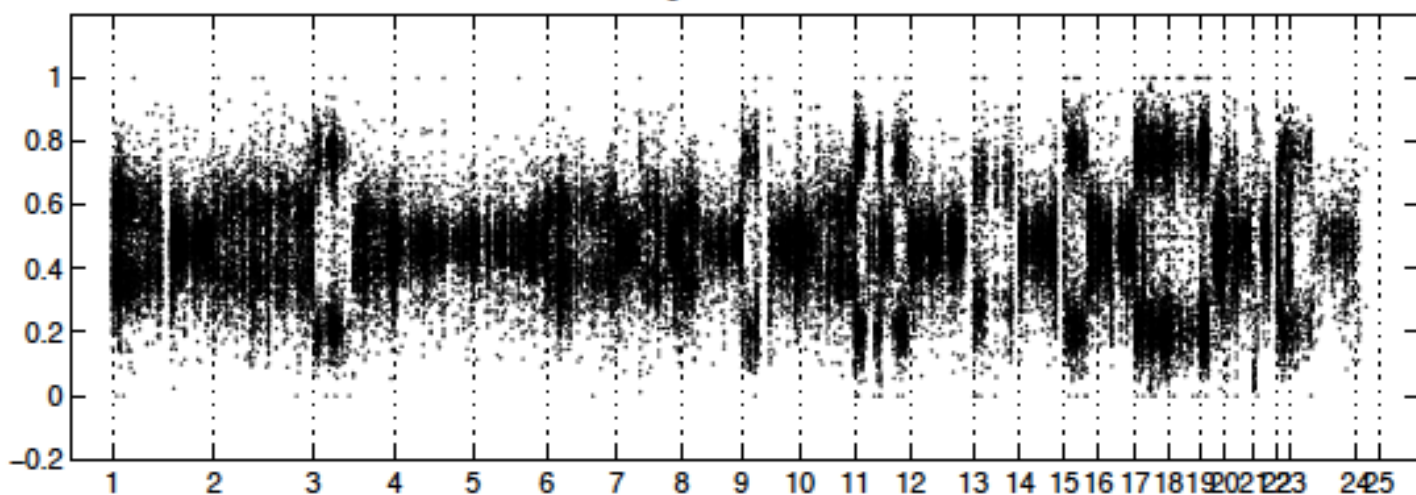

241\_ucsc.edu\_BRCA.IlluminaGA\_DNASeq.Level\_2.10.0.0\_TCGA-BH-A0GY\_W  
germline-het

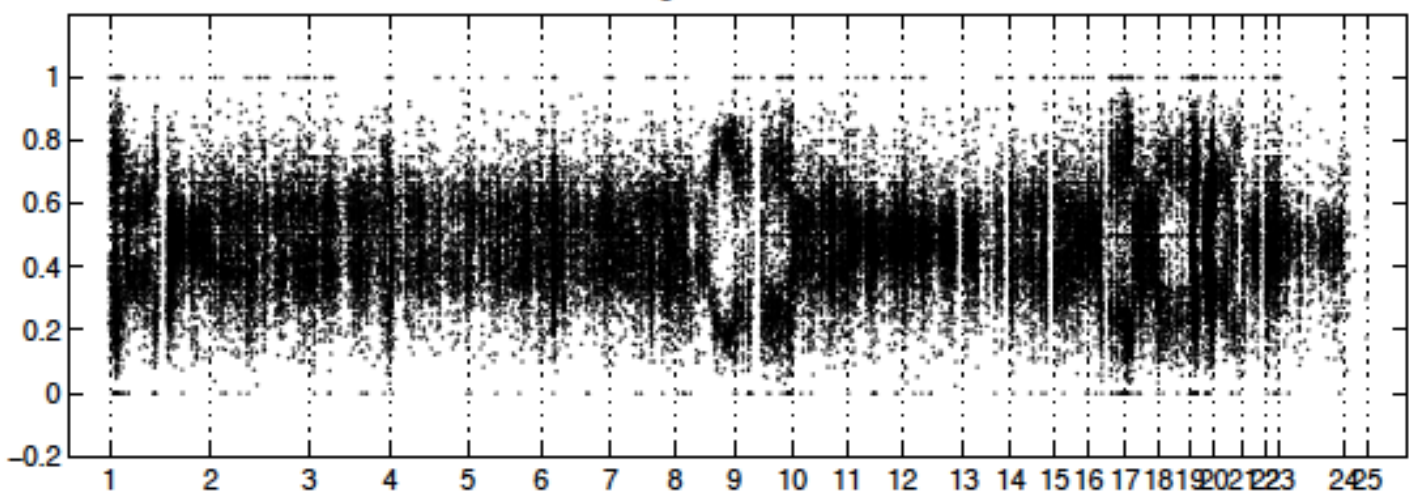

242\_ucsc.edu\_BRCA.IlluminaGA\_DNASeq.Level\_2.9.0.0\_TCGA-B6-A0RG\_W  
germline-het

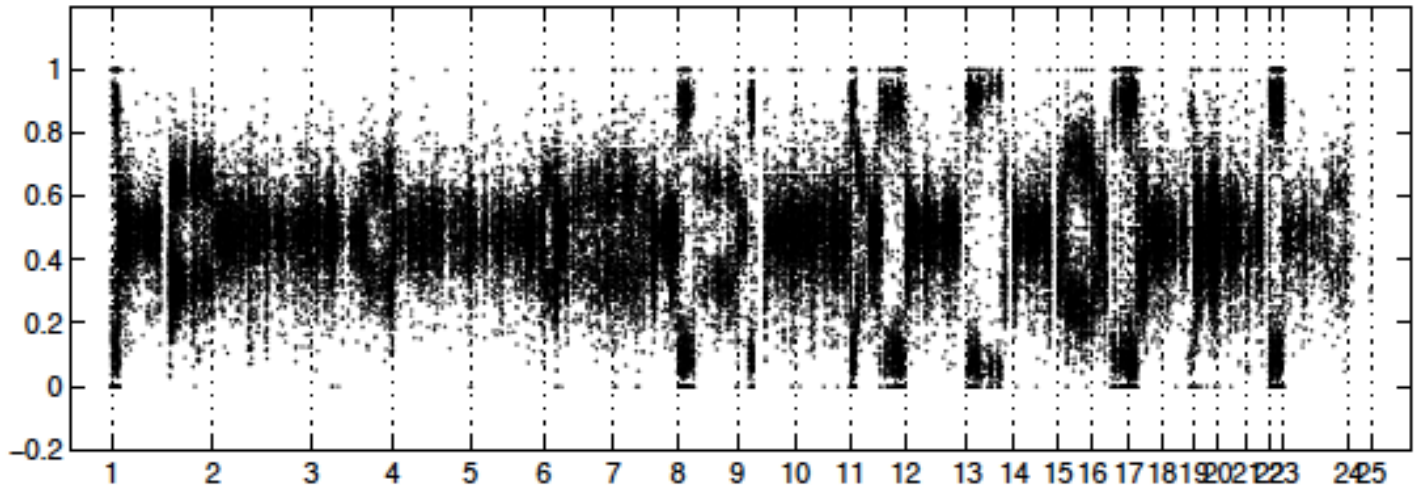

243\_ucsc.edu\_BRCA.IlluminaGA\_DNASeq.Level\_2.13.0.0\_TCGA-E2-A159\_D  
germline-het

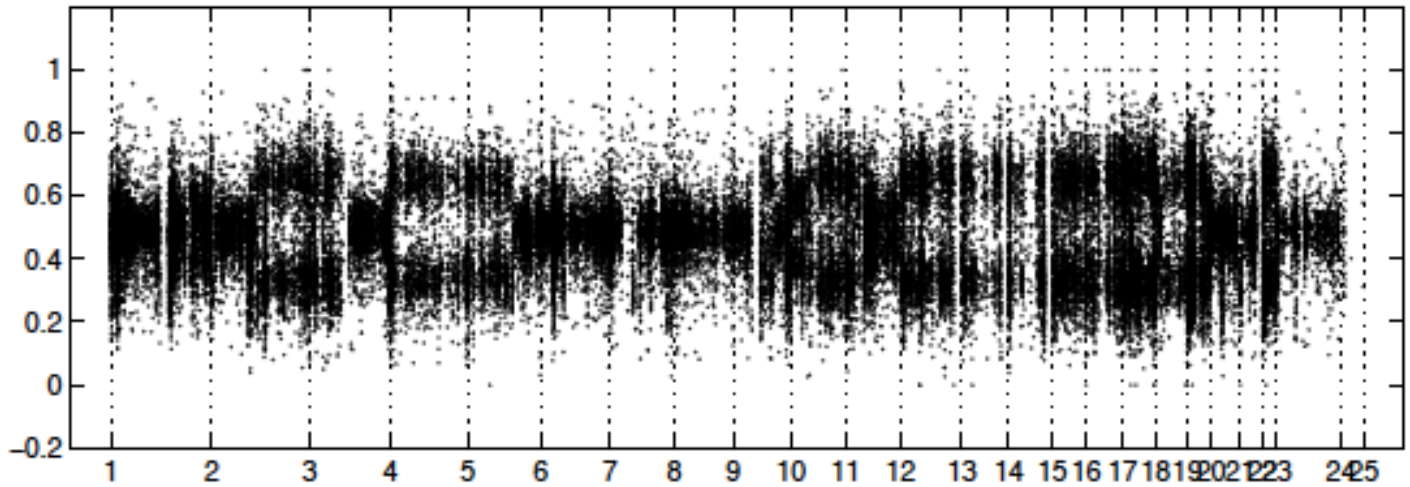

244\_ucsc.edu\_BRCA.IlluminaGA\_DNASeq.Level\_2.4.0.0\_TCGA-A8-A09B\_W  
germline-het

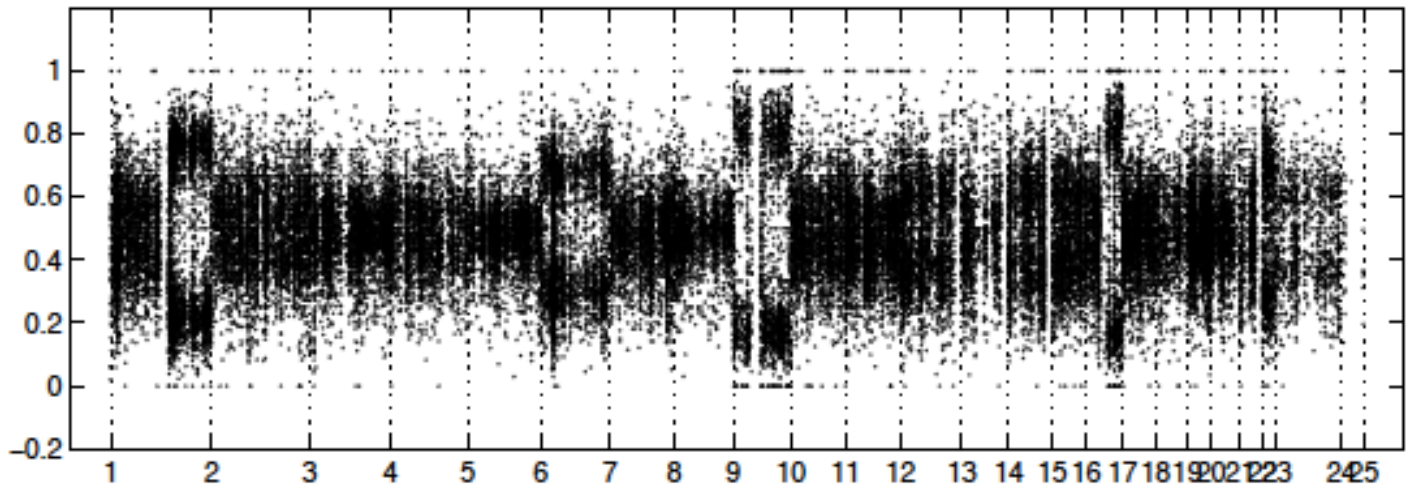

245\_ucsc.edu\_BRCA.IlluminaGA\_DNASeq.Level\_2.4.0.0\_TCGA-A8-A0A2\_W  
germline-het

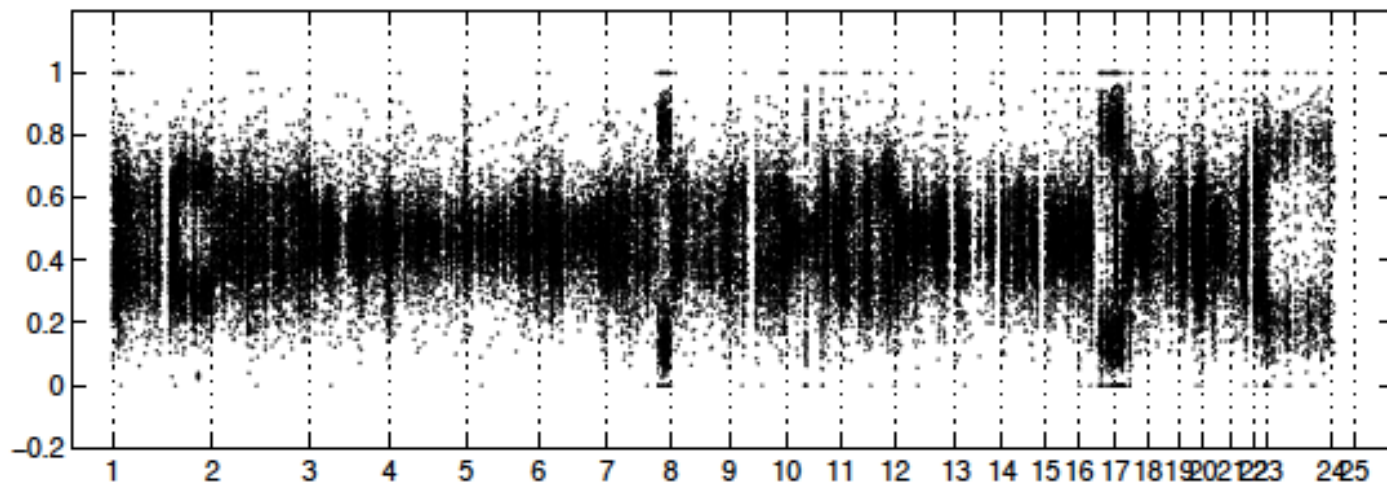

246\_ucsc.edu\_BRCA.IlluminaGA\_DNASeq.Level\_2.6.0.0\_TCGA-AO-A129\_D  
germline-het

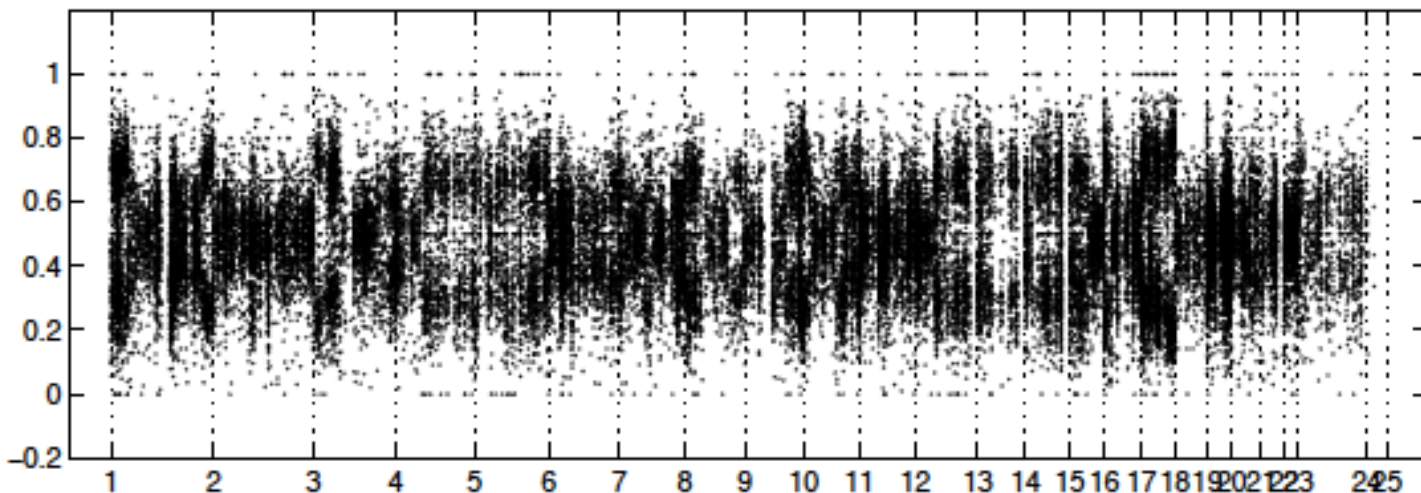

247\_ucsc.edu\_BRCA.IlluminaGA\_DNASeq.Level\_2.8.0.0\_TCGA-AR-A1AV\_D  
germline-het

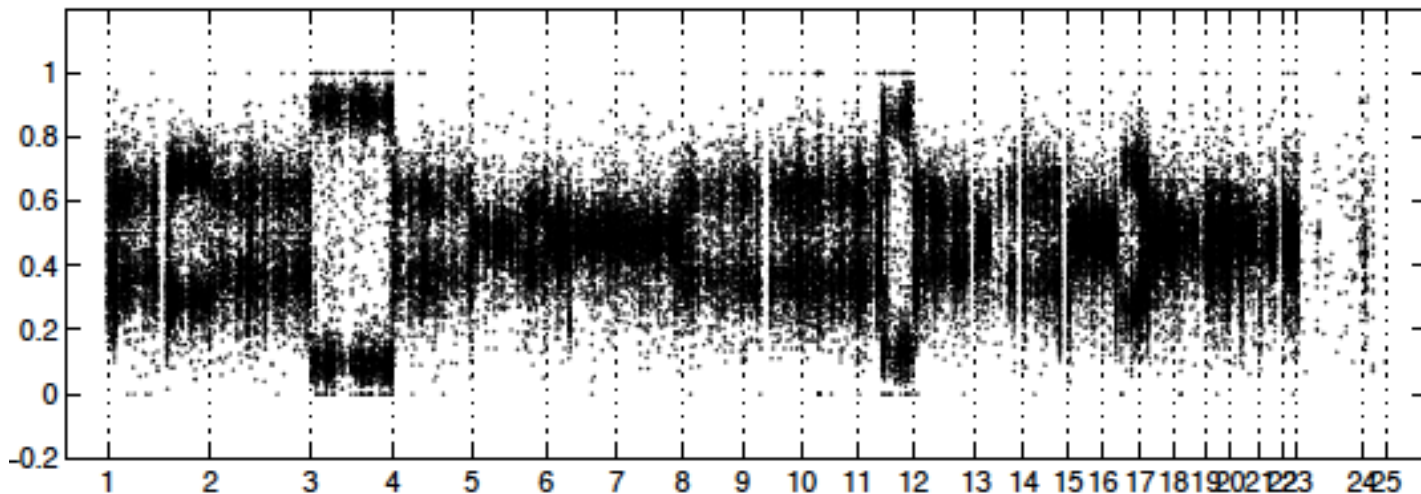

248\_ucsc.edu\_BRCA.IlluminaGA\_DNASeq.Level\_2.6.0.0\_TCGA-AO-A12G\_D  
germline-het

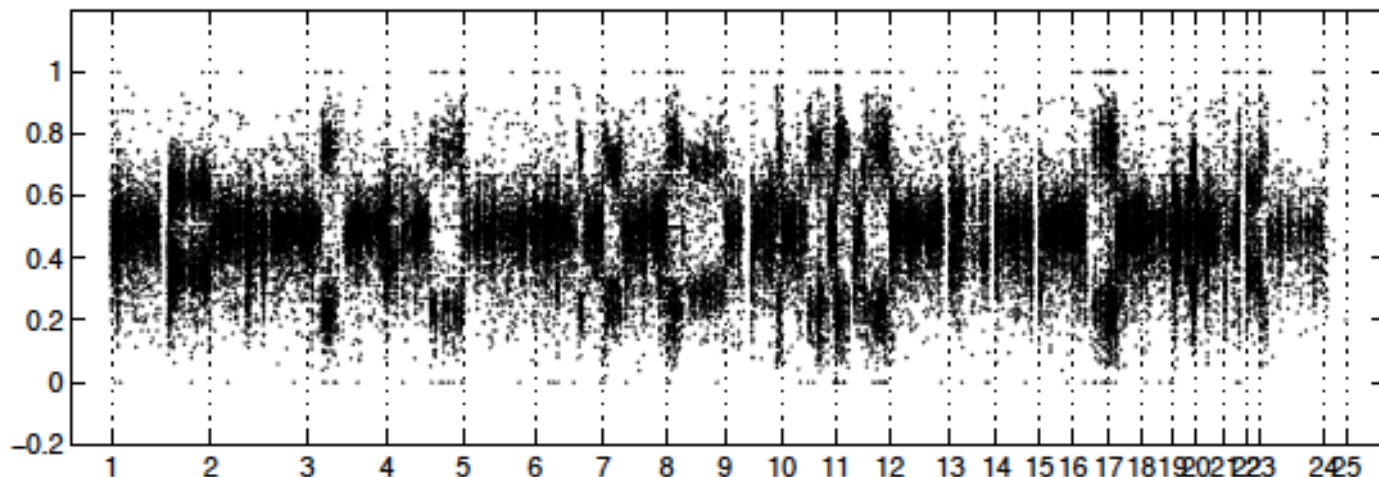

249\_ucsc.edu\_BRCA.IlluminaGA\_DNASeq.Level\_2.11.0.0\_TCGA-C8-A12Q\_D  
germline-het

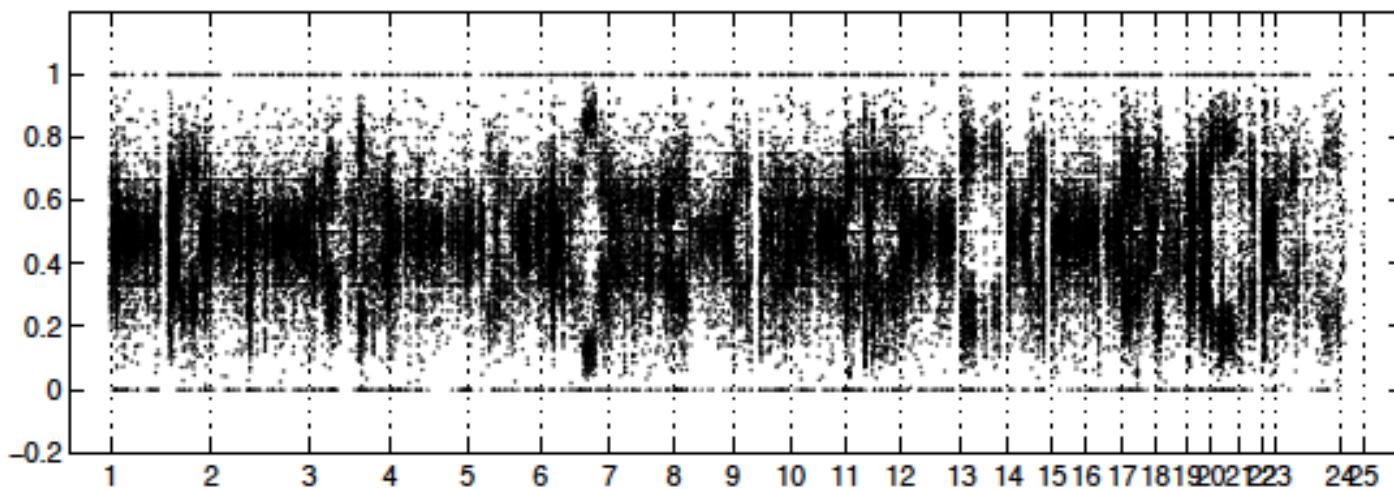

250\_ucsc.edu\_BRCA.IlluminaGA\_DNASeq.Level\_2.9.0.0\_TCGA-B6-A0RP\_D  
germline-het

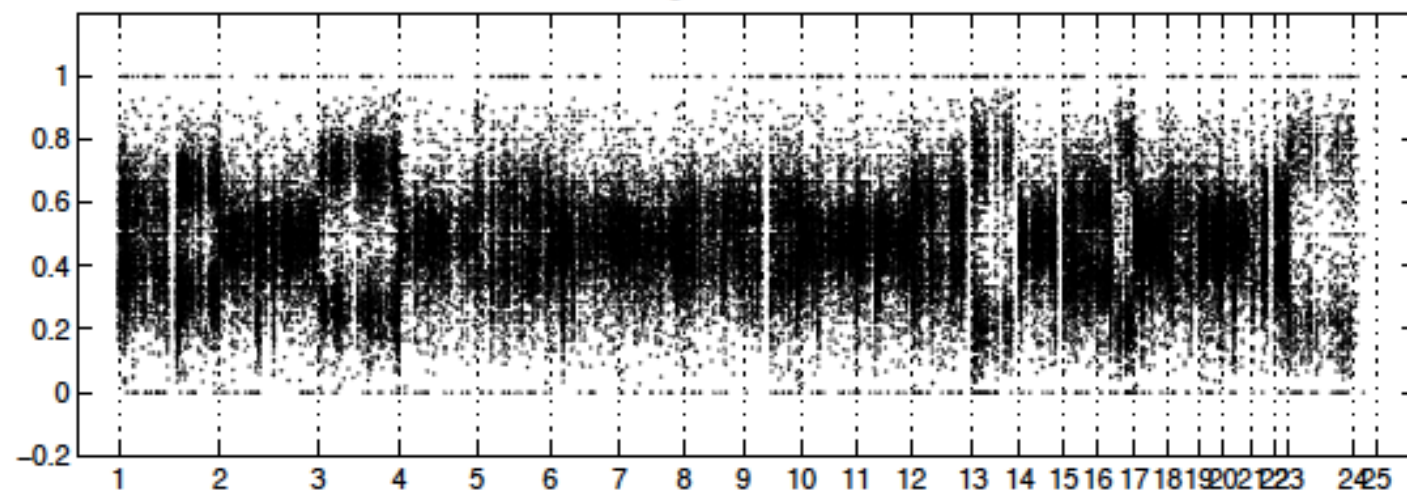

251\_ucsc.edu\_BRCA.IlluminaGA\_DNASeq.Level\_2.5.0.0\_TCGA-AN-A0FK\_W  
germline-het

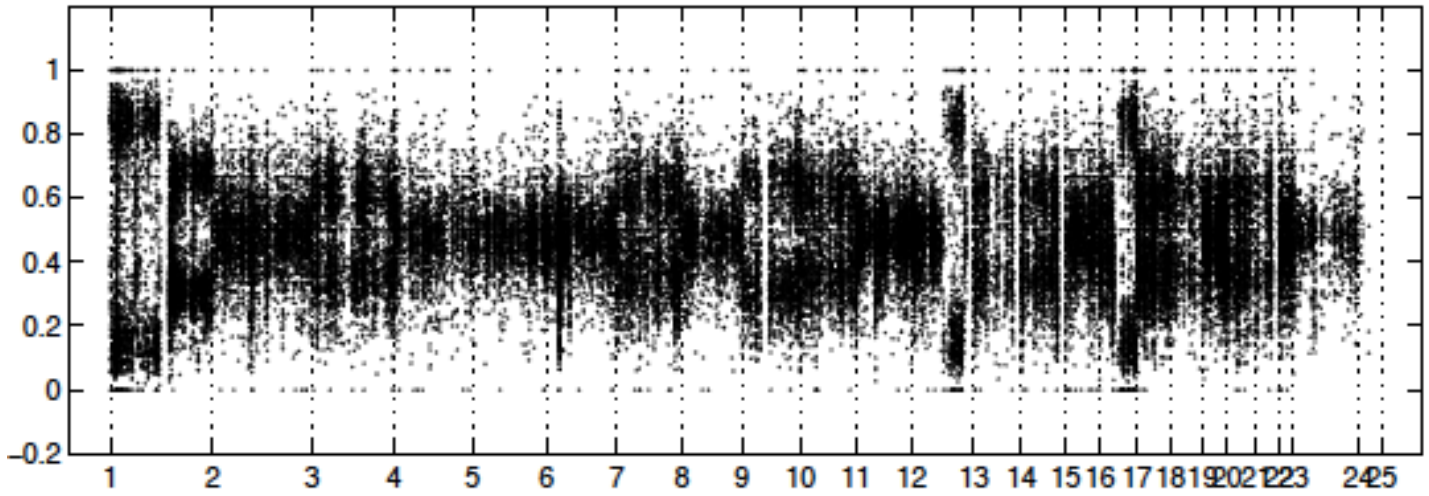

252\_ucsc.edu\_BRCA.IlluminaGA\_DNASeq.Level\_2.10.0.0\_TCGA-BH-A0DH\_D  
germline-het

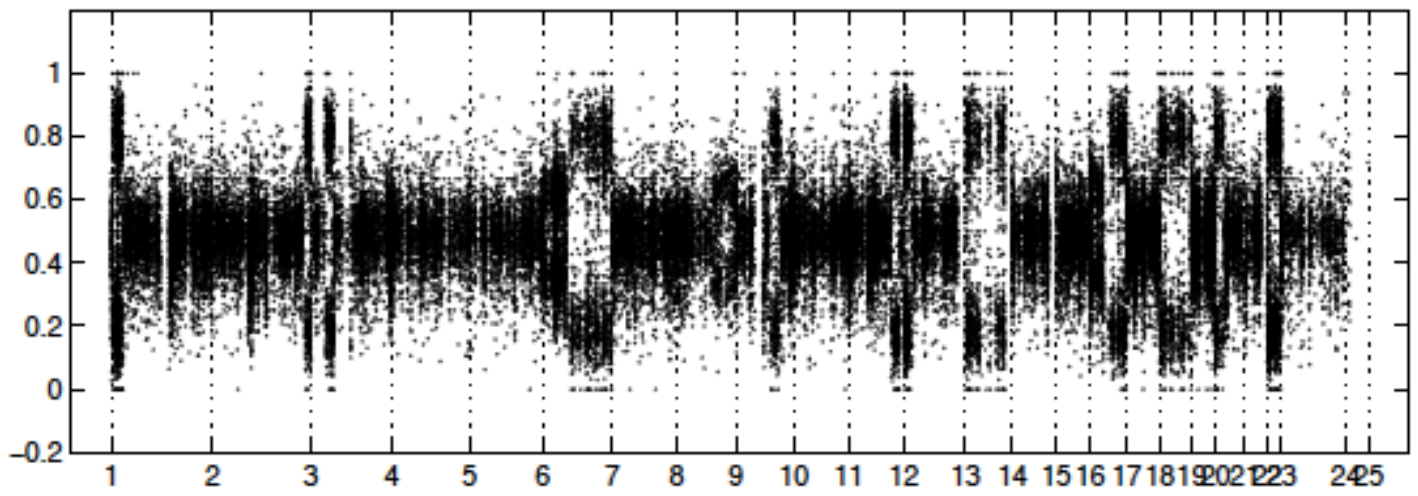

253\_ucsc.edu\_BRCA.IlluminaGA\_DNASeq.Level\_2.4.0.0\_TCGA-A8-A08T\_W  
germline-het

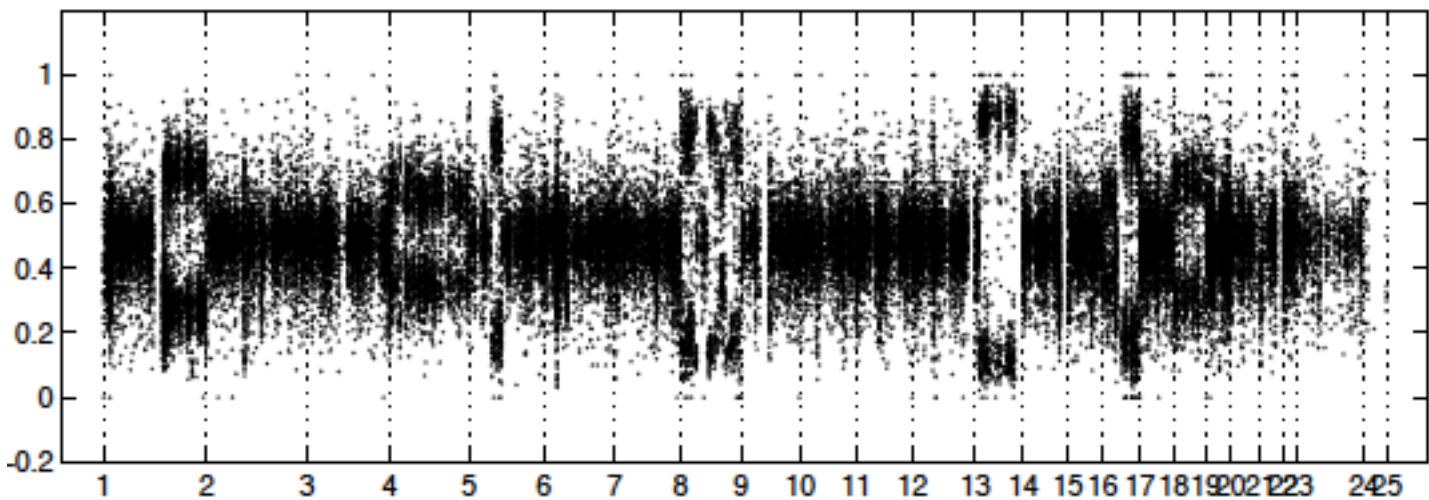

254\_ucsc.edu\_BRCA.IlluminaGA\_DNASeq.Level\_2.4.0.0\_TCGA-A8-A099\_W  
germline-het

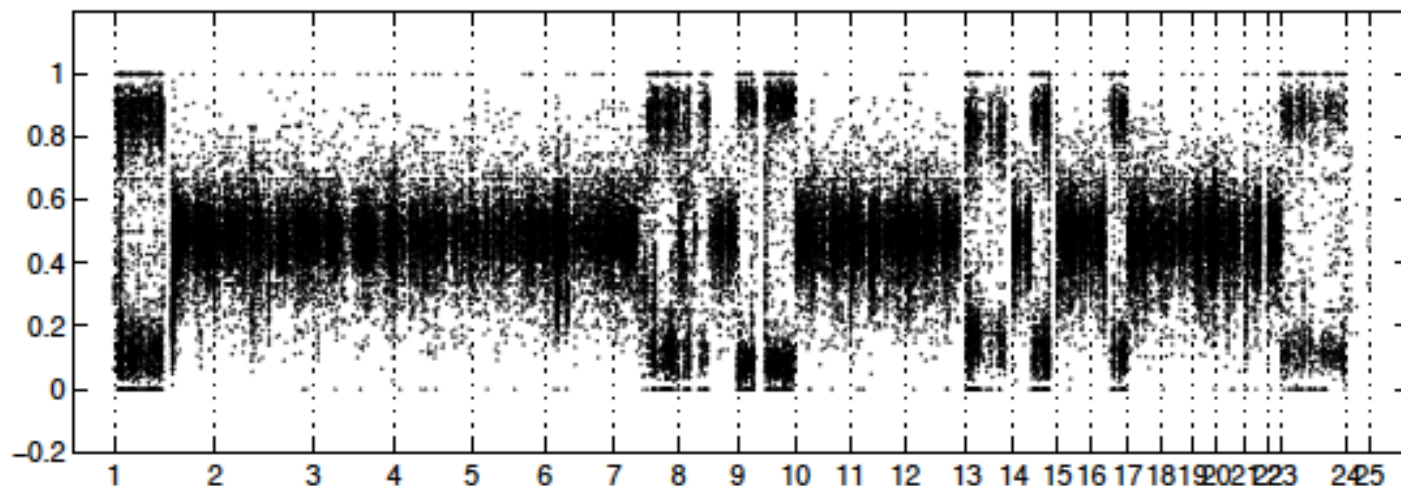

255\_ucsc.edu\_BRCA.IlluminaGA\_DNASeq.Level\_2.5.0.0\_TCGA-AN-A0AK\_W  
germline-het

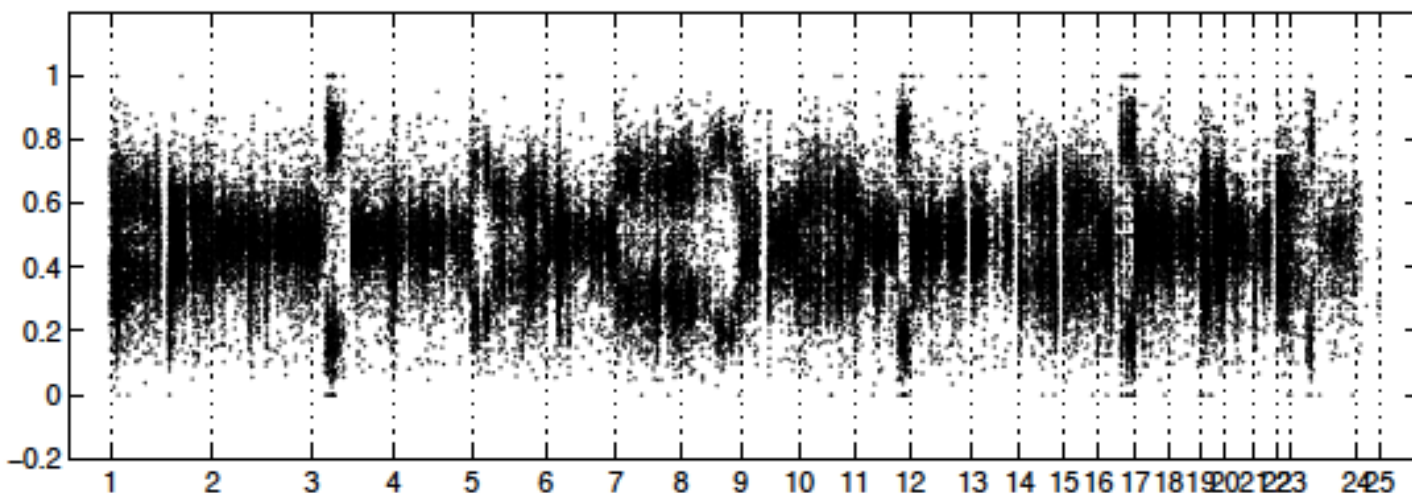

256\_ucsc.edu\_BRCA.IlluminaGA\_DNASeq.Level\_2.13.0.0\_TCGA-E2-A14S\_D  
germline-het

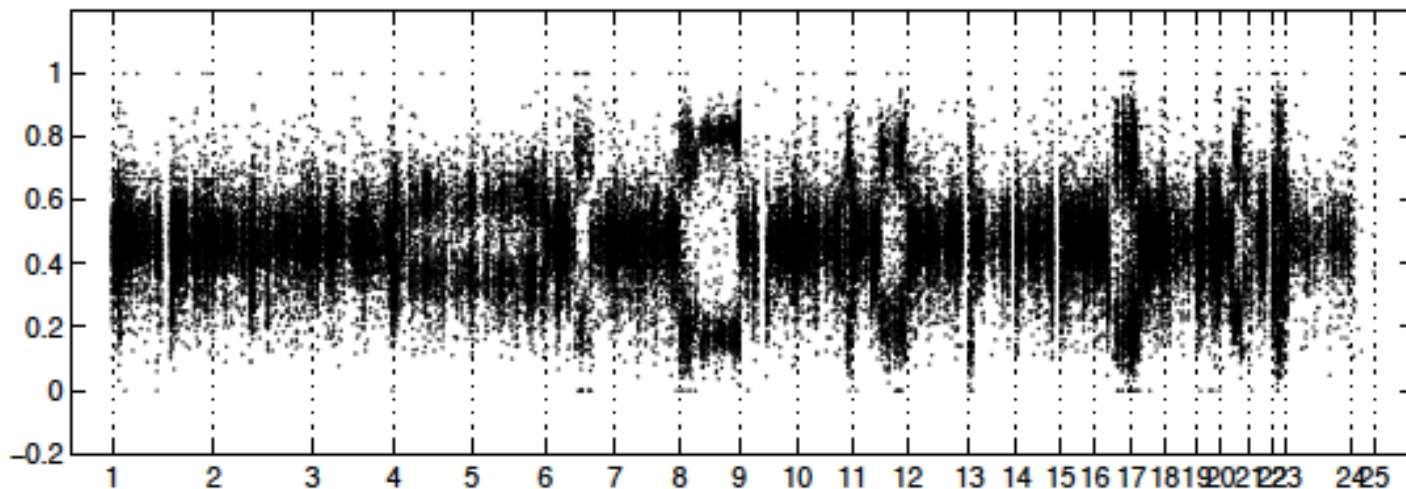

257\_ucsc.edu\_BRCA.IlluminaGA\_DNASeq.Level\_2.6.0.0\_TCGA-AO-A0J4\_W  
germline-het

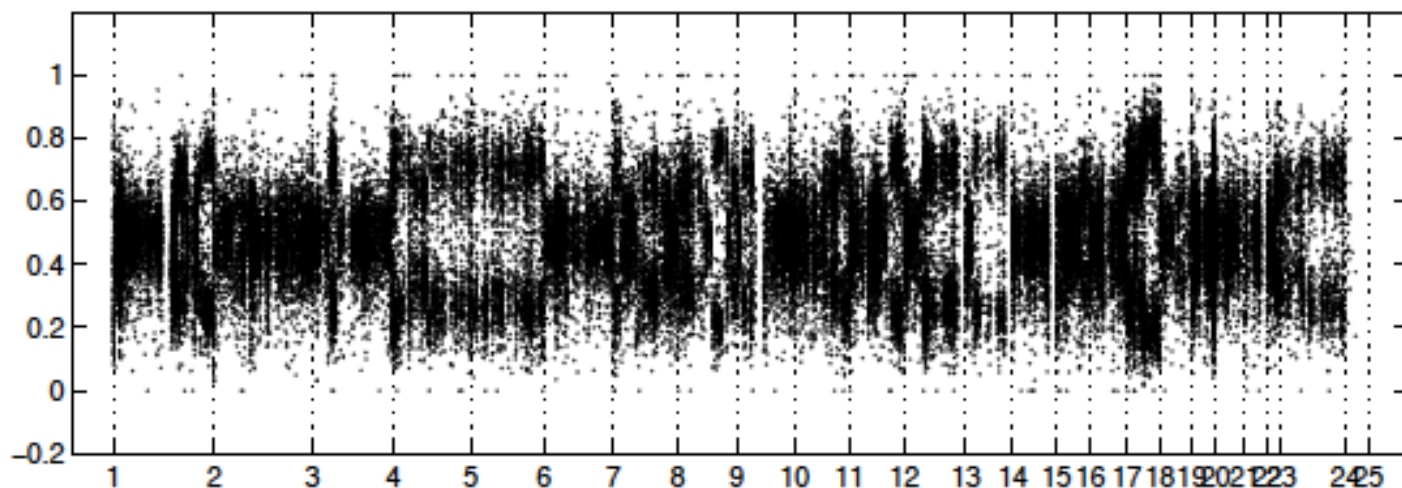

258\_ucsc.edu\_BRCA.IlluminaGA\_DNASeq.Level\_2.10.0.0\_TCGA-BH-A0AW\_W  
germline-het

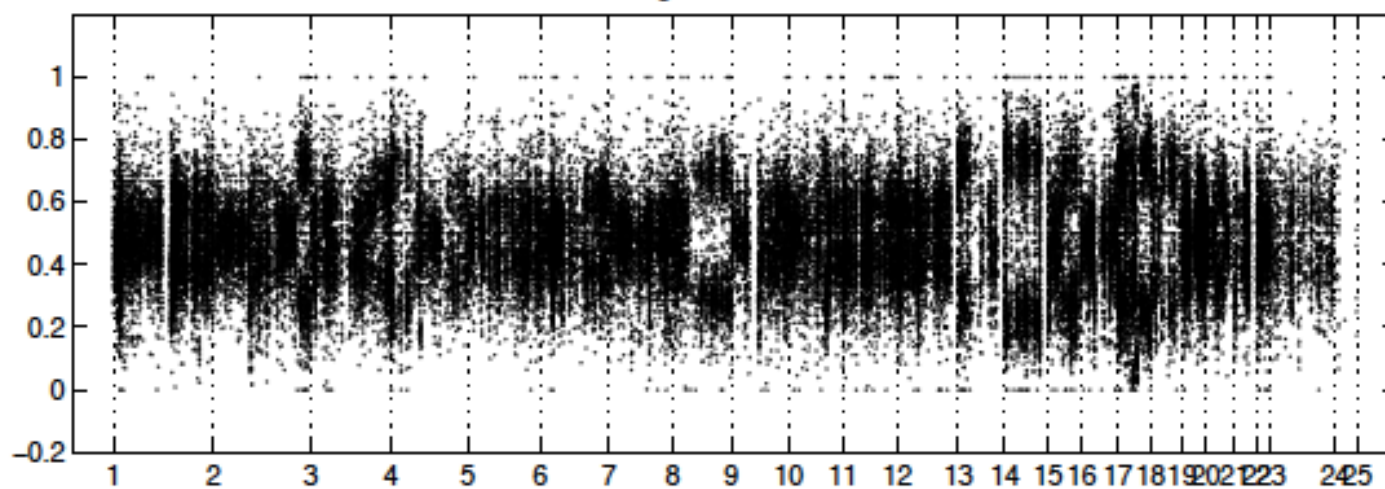

259\_ucsc.edu\_BRCA.IlluminaGA\_DNASeq.Level\_2.13.0.0\_TCGA-E2-A15F\_D  
germline-het

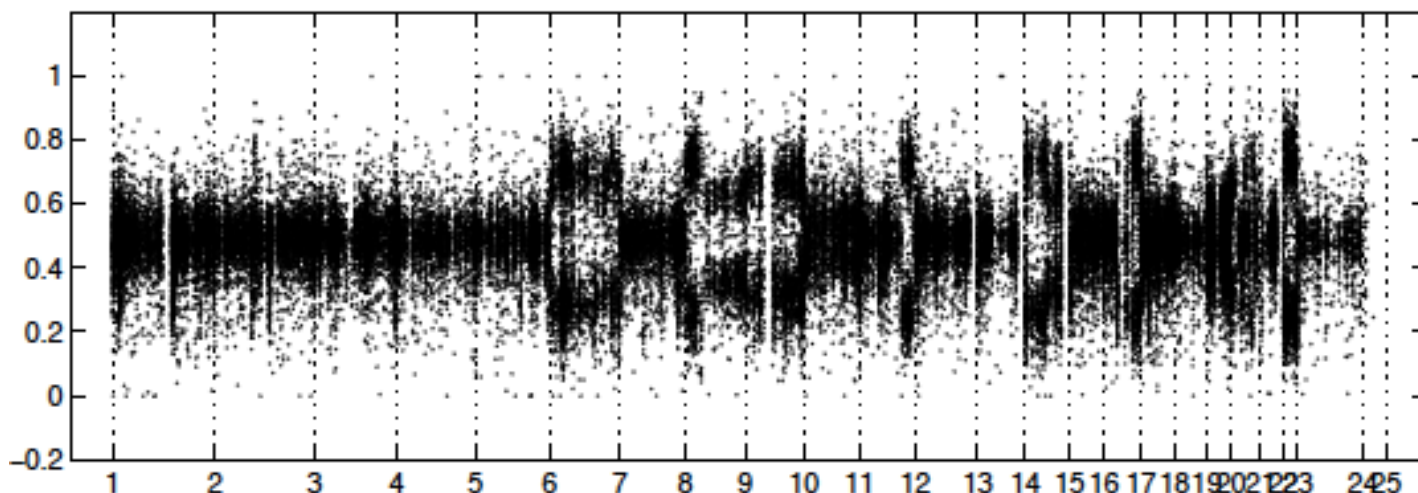



260\_ucsc.edu\_BRCA.IlluminaGA\_DNASeq.Level\_2.2.0.0\_TCGA-A2-A0CS\_D  
germline-het

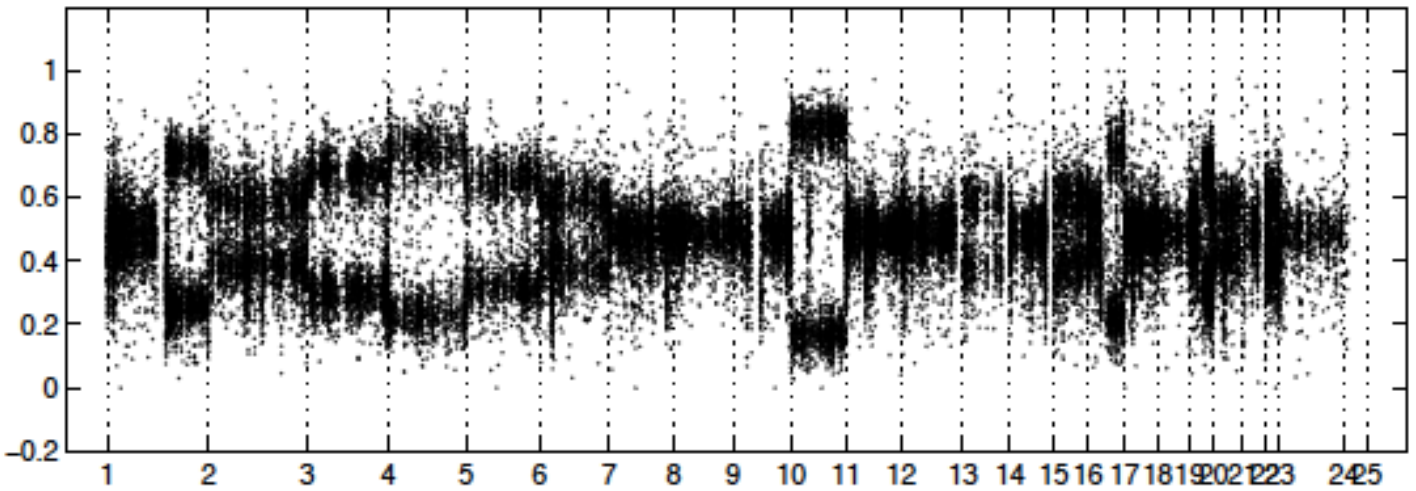

261\_ucsc.edu\_BRCA.IlluminaGA\_DNASeq.Level\_2.4.0.0\_TCGA-A8-A08P\_W  
germline-het

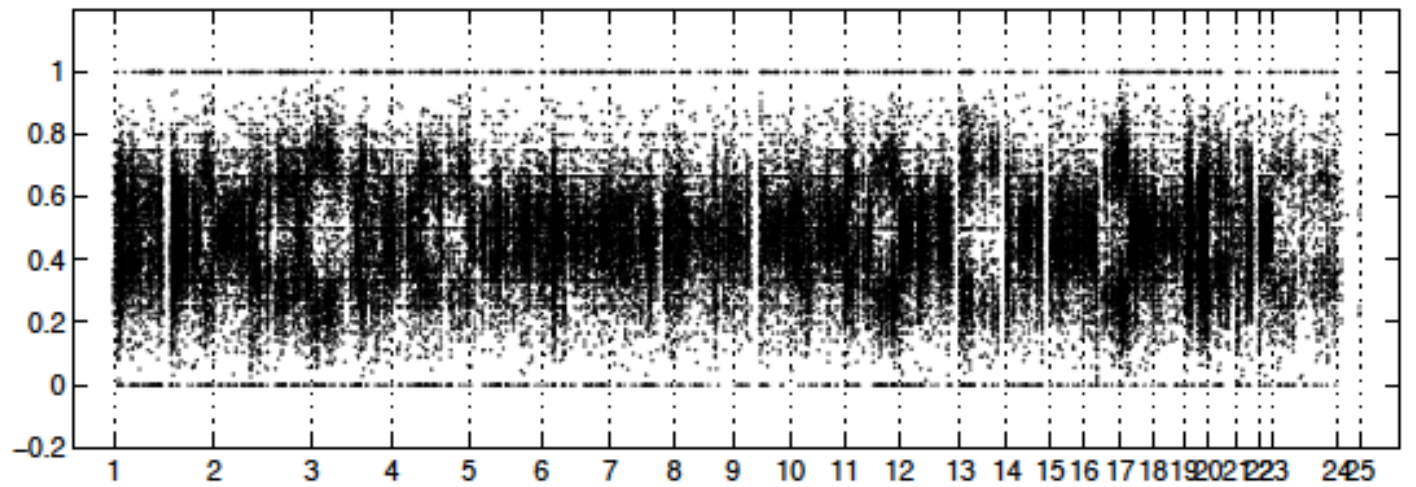

262\_ucsc.edu\_BRCA.IlluminaGA\_DNASeq.Level\_2.14.0.0\_TCGA-BH-A0W3\_W  
germline-het

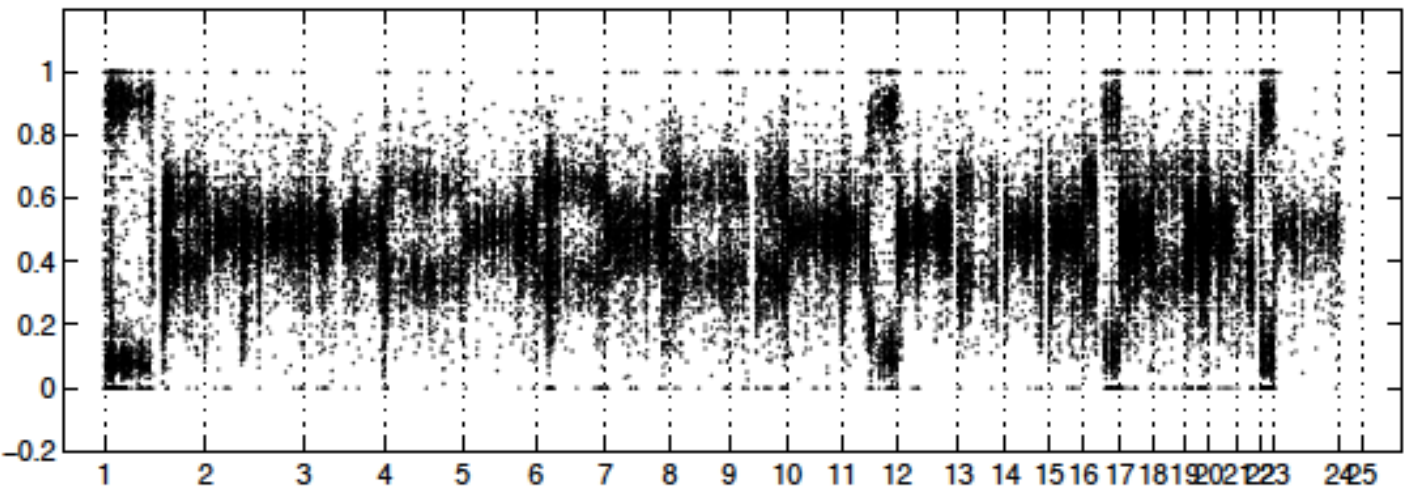

263\_ucsc.edu\_BRCA.IlluminaGA\_DNASeq.Level\_2.6.0.0\_TCGA-AO-A0JI\_W  
germline-het

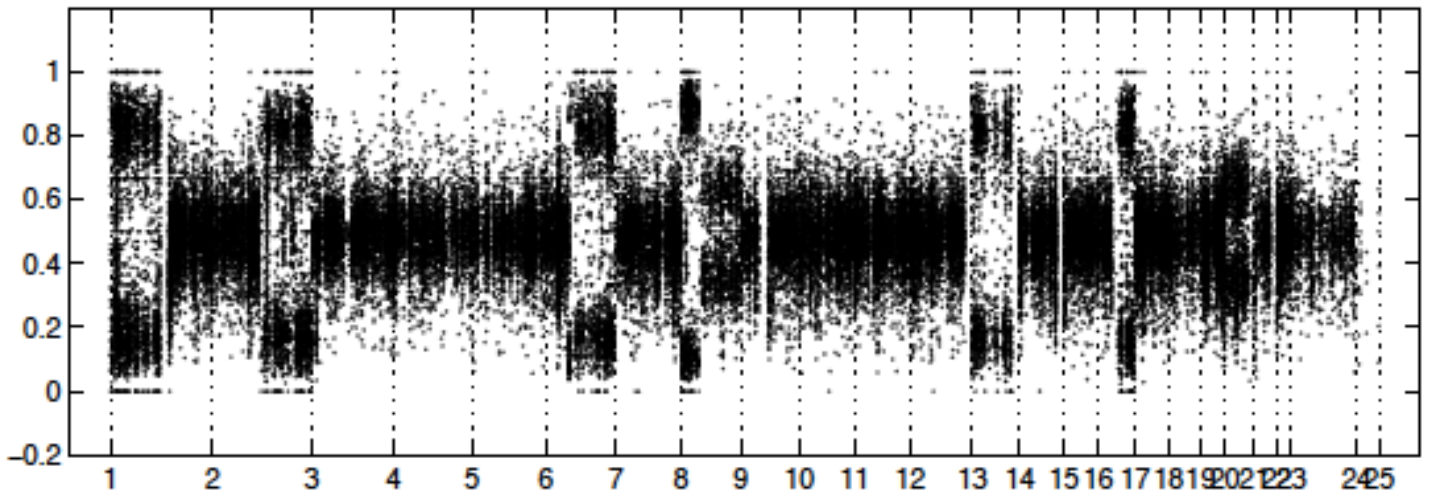

264\_ucsc.edu\_BRCA.IlluminaGA\_DNASeq.Level\_2.8.0.0\_TCGA-AR-A1AS\_D  
germline-het

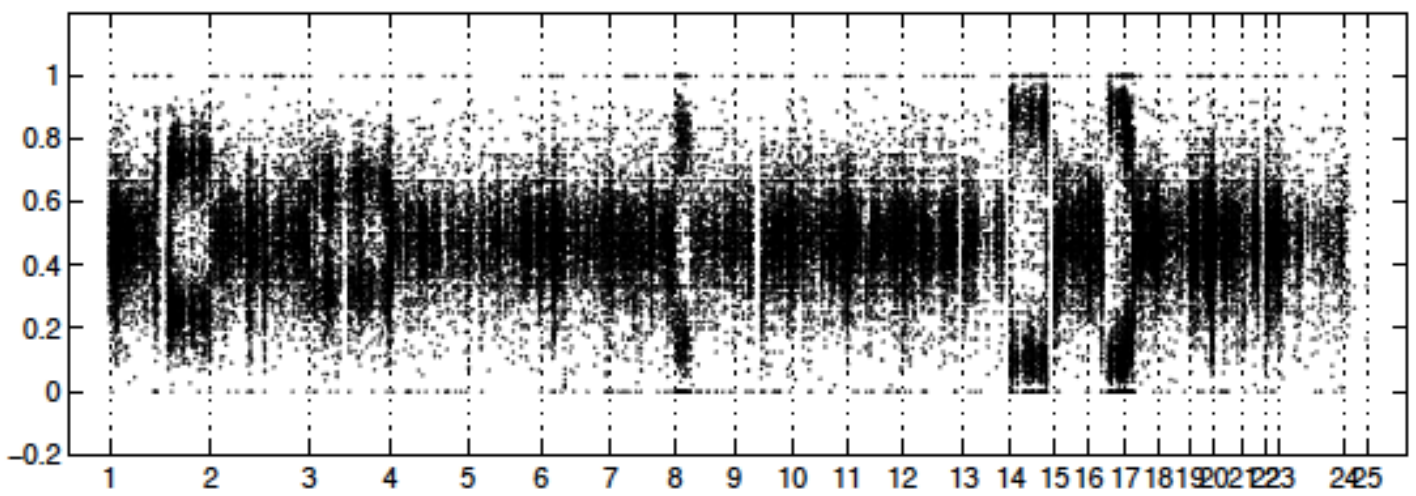

265\_ucsc.edu\_BRCA.IlluminaGA\_DNASeq.Level\_2.10.0.0\_TCGA-BH-A0HB\_W  
germline-het

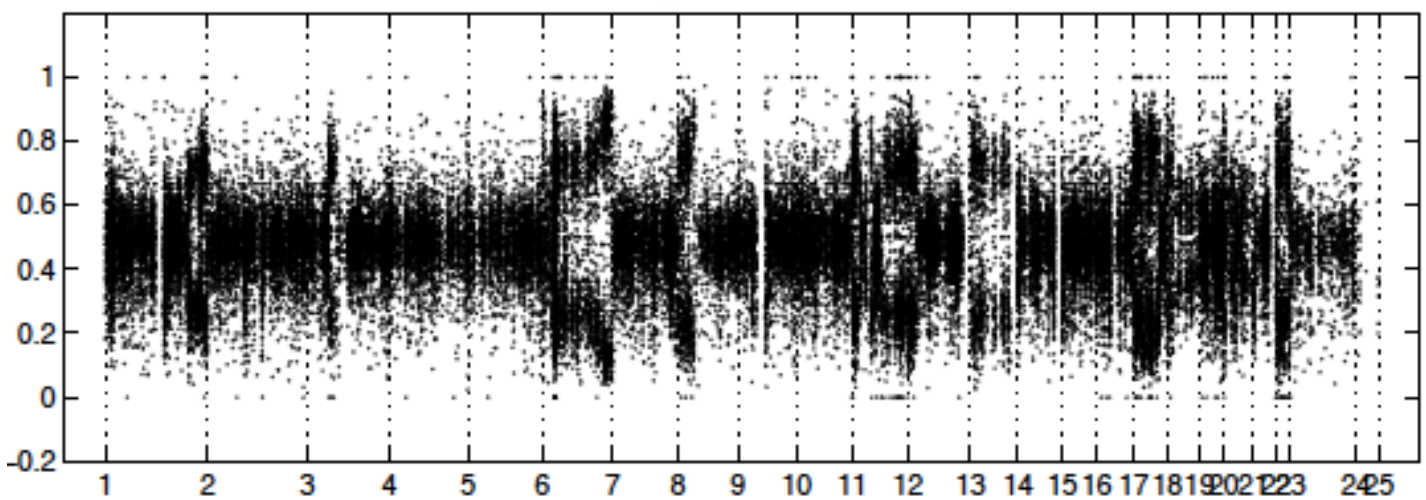

266\_ucsc.edu\_BRCA.IlluminaGA\_DNASeq.Level\_2.4.0.0\_TCGA-A8-A09A\_W  
germline-het

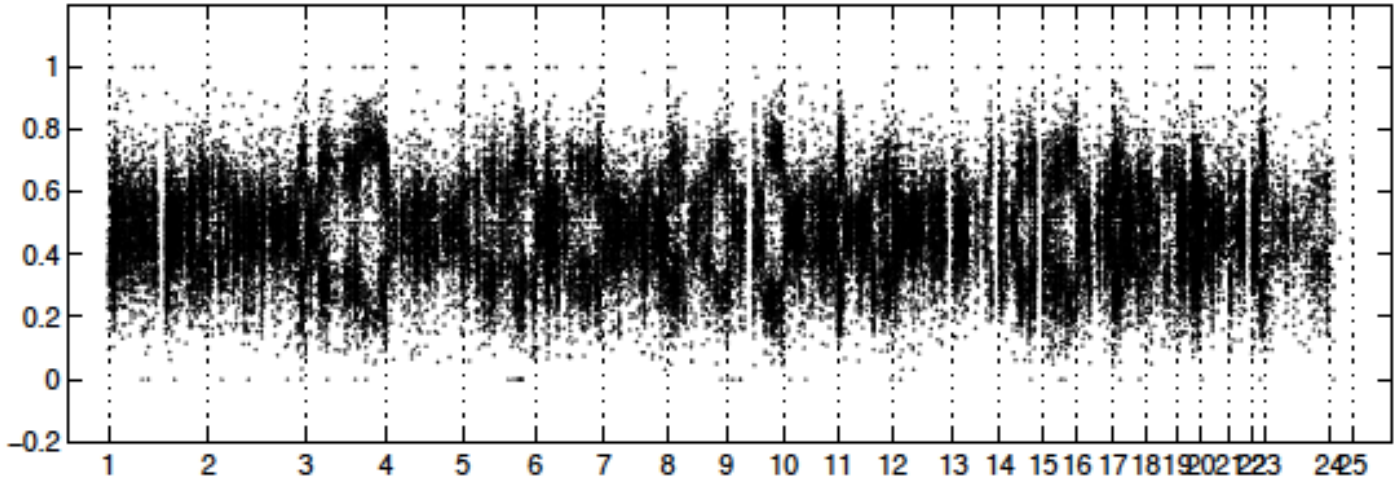

267\_ucsc.edu\_BRCA.IlluminaGA\_DNASeq.Level\_2.11.0.0\_TCGA-C8-A1HL\_D  
germline-het

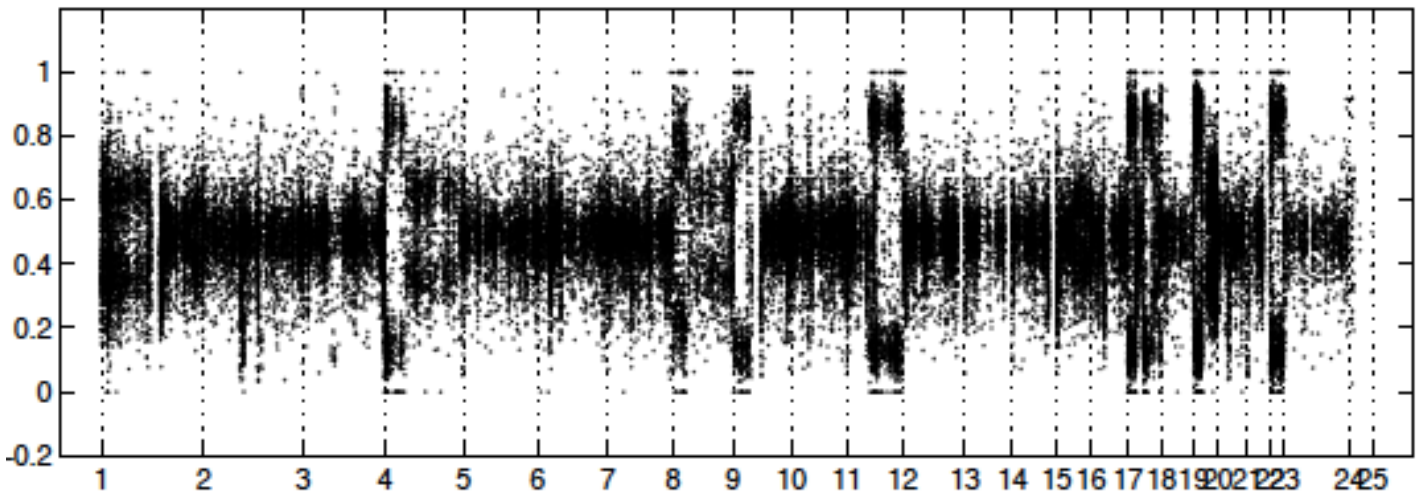

268\_ucsc.edu\_BRCA.IlluminaGA\_DNASeq.Level\_2.2.0.0\_TCGA-A2-A0YG\_D  
germline-het

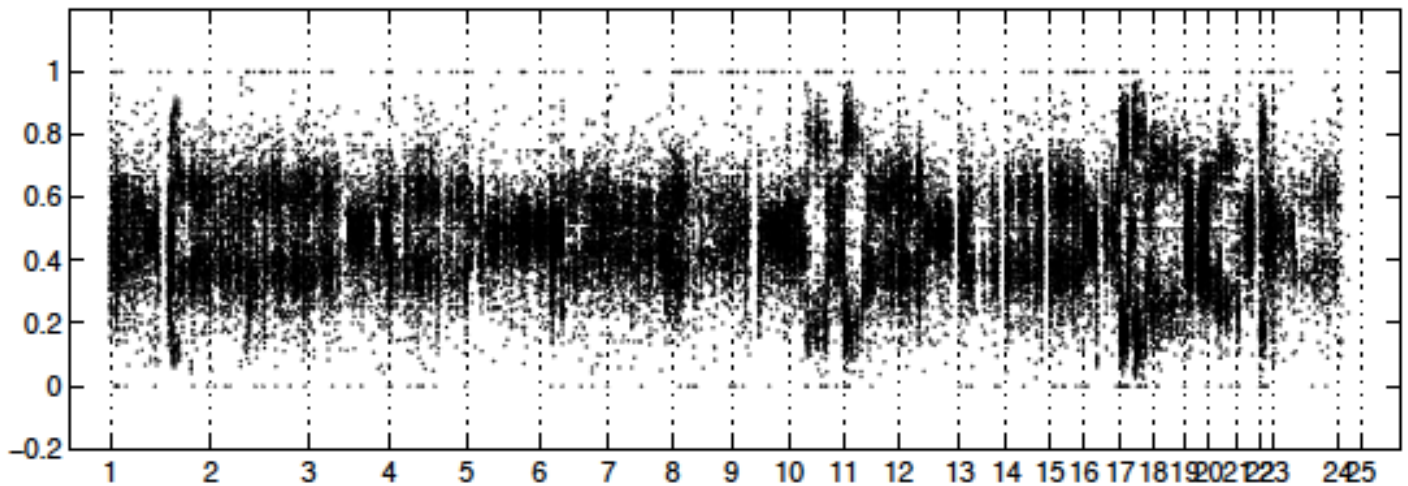

269\_ucsc.edu\_BRCA.IlluminaGA\_DNASeq.Level\_2.8.0.0\_TCGA-AR-A1AR\_D  
germline-het

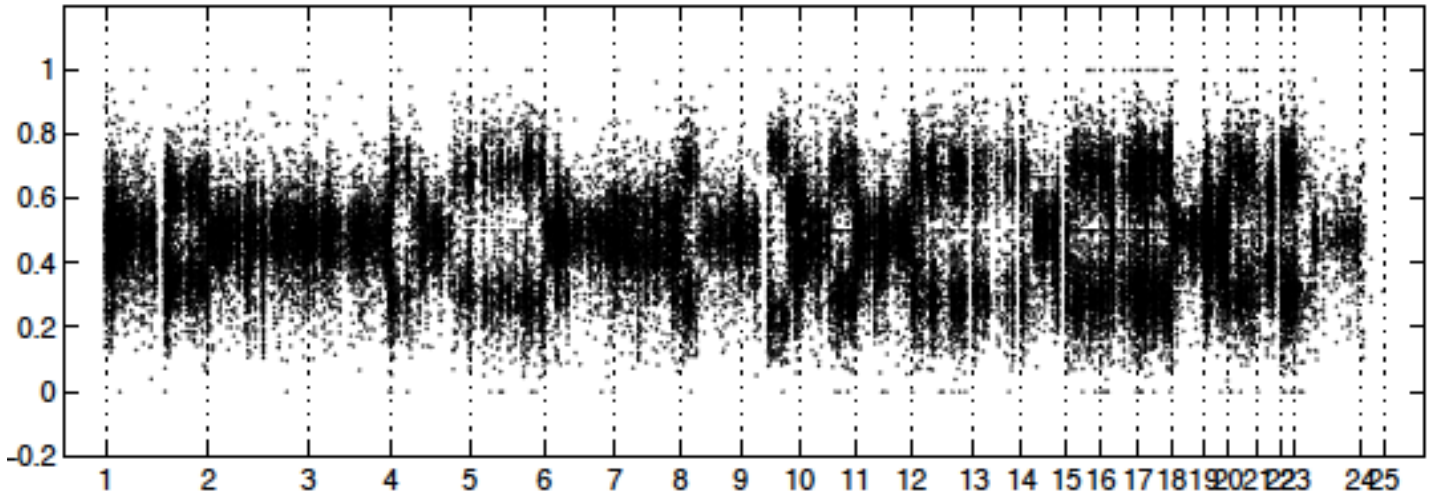

270\_ucsc.edu\_BRCA.IlluminaGA\_DNASeq.Level\_2.10.0.0\_TCGA-BH-A0C1\_D  
germline-het

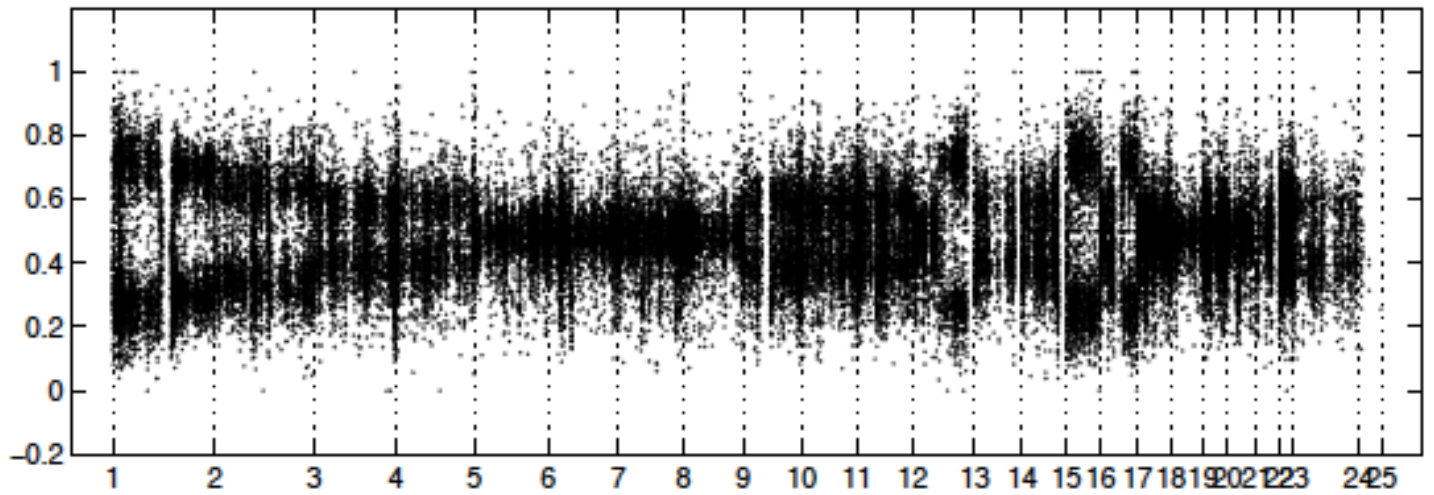

271\_ucsc.edu\_BRCA.IlluminaGA\_DNASeq.Level\_2.6.0.0\_TCGA-AO-A0JG\_D  
germline-het

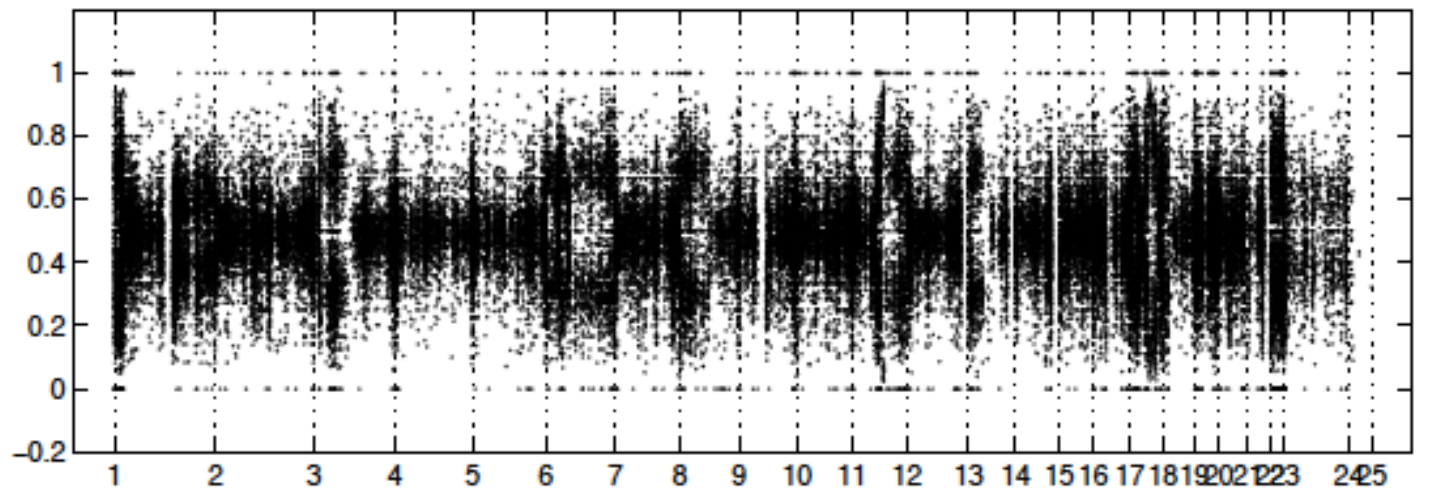

272\_ucsc.edu\_BRCA.IlluminaGA\_DNASeq.Level\_2.8.0.0\_TCGA-AR-A0TR\_D  
germline-het

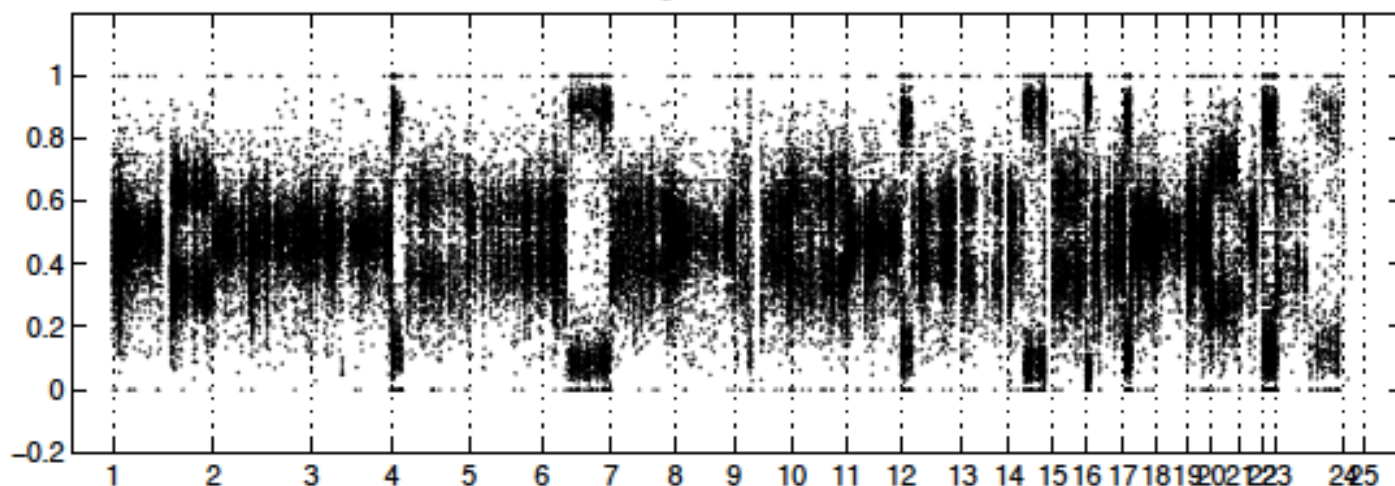

273\_ucsc.edu\_BRCA.IlluminaGA\_DNASeq.Level\_2.2.0.0\_TCGA-A2-A04R\_D  
germline-het

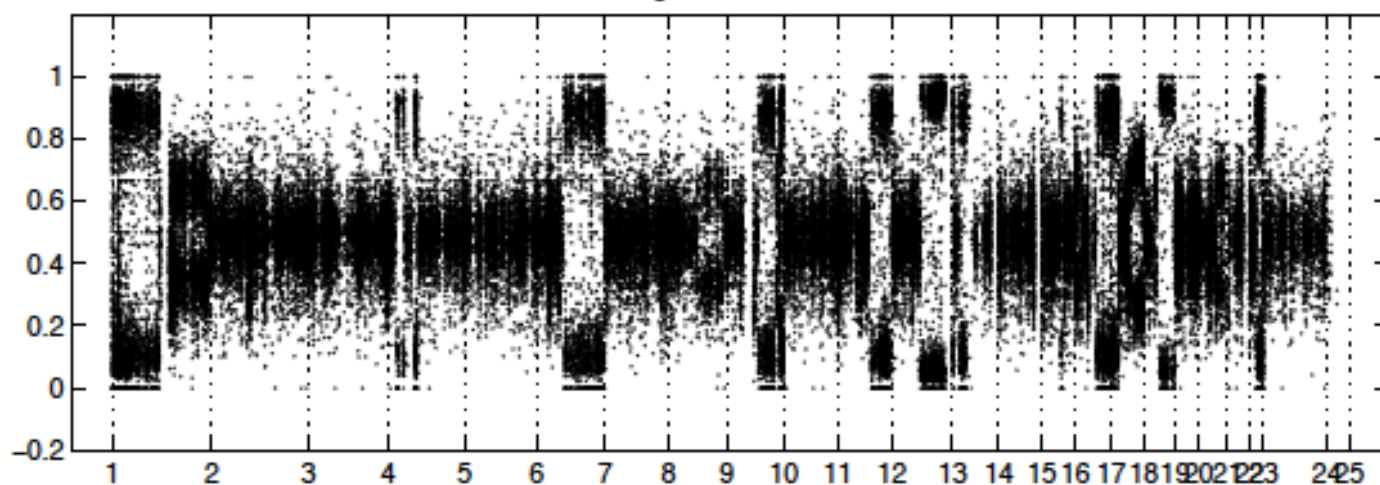

274\_ucsc.edu\_BRCA.IlluminaGA\_DNASeq.Level\_2.13.0.0\_TCGA-E2-A15T\_D  
germline-het

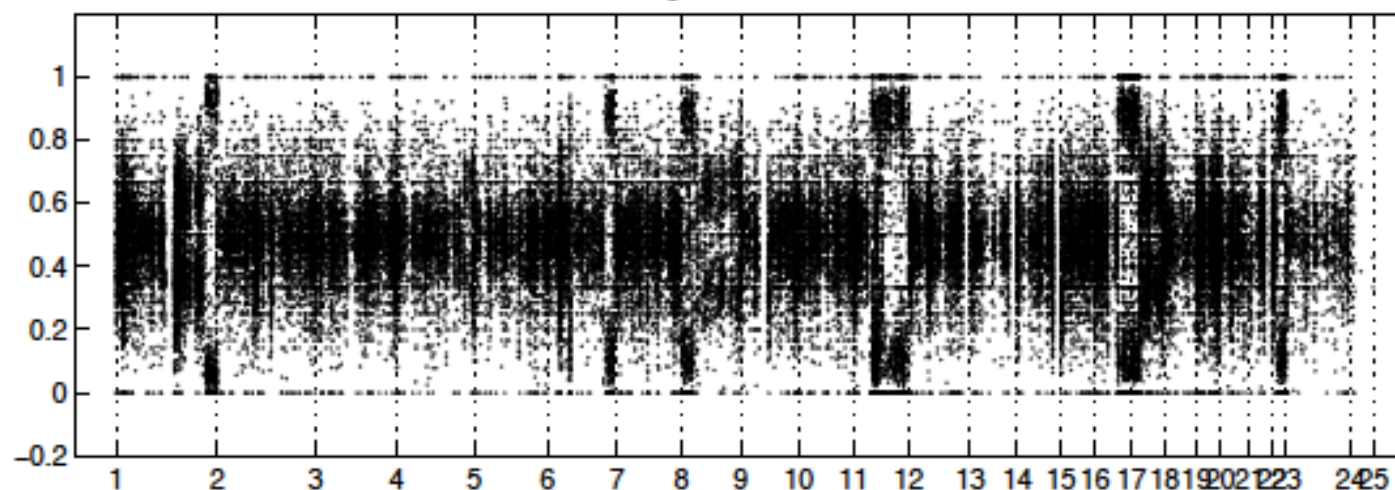

275\_ucsc.edu\_BRCA.IlluminaGA\_DNASeq\_Level\_2.13.0.0\_TCGA-E2-A107\_D  
germline-het

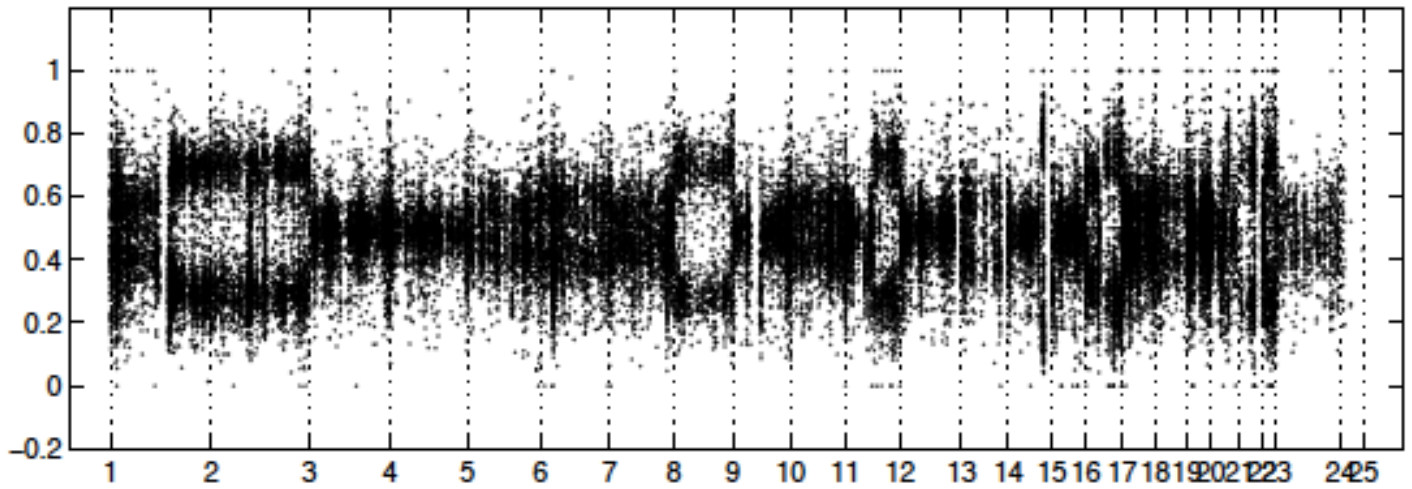

276\_ucsc.edu\_BRCA.IlluminaGA\_DNASeq\_Level\_2.9.0.0\_TCGA-B6-A0RO\_D  
germline-het

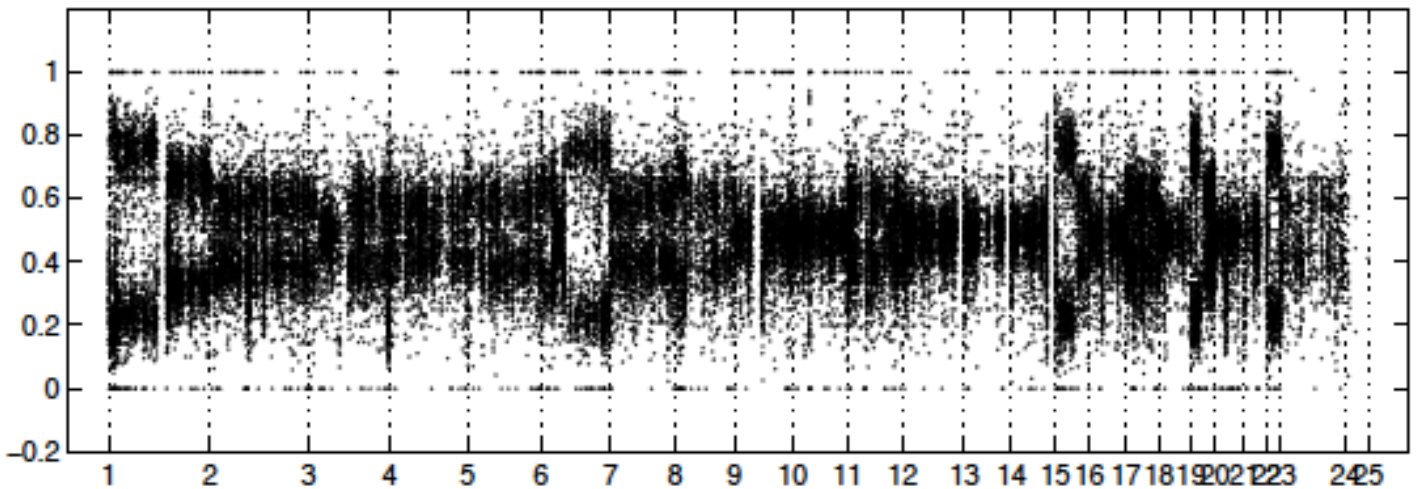

277\_ucsc.edu\_BRCA.IlluminaGA\_DNASeq\_Level\_2.4.0.0\_TCGA-A8-A09D\_W  
germline-het

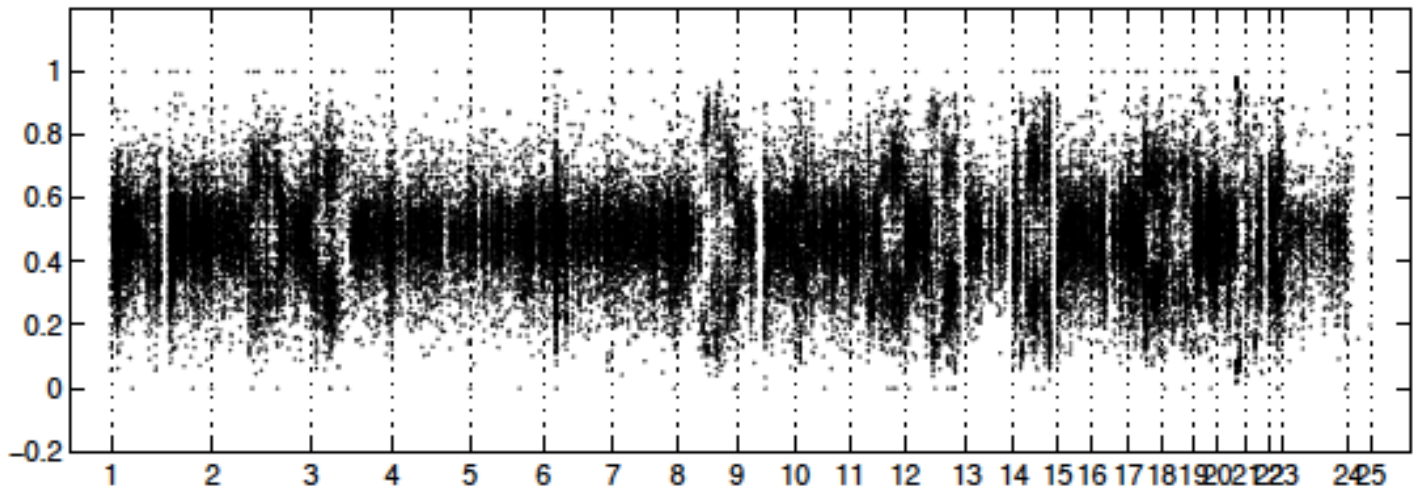

278\_ucsc.edu\_BRCA.IlluminaGA\_DNASeq.Level\_2.4.0.0\_TCGA-A8-A09T\_W  
germline-het

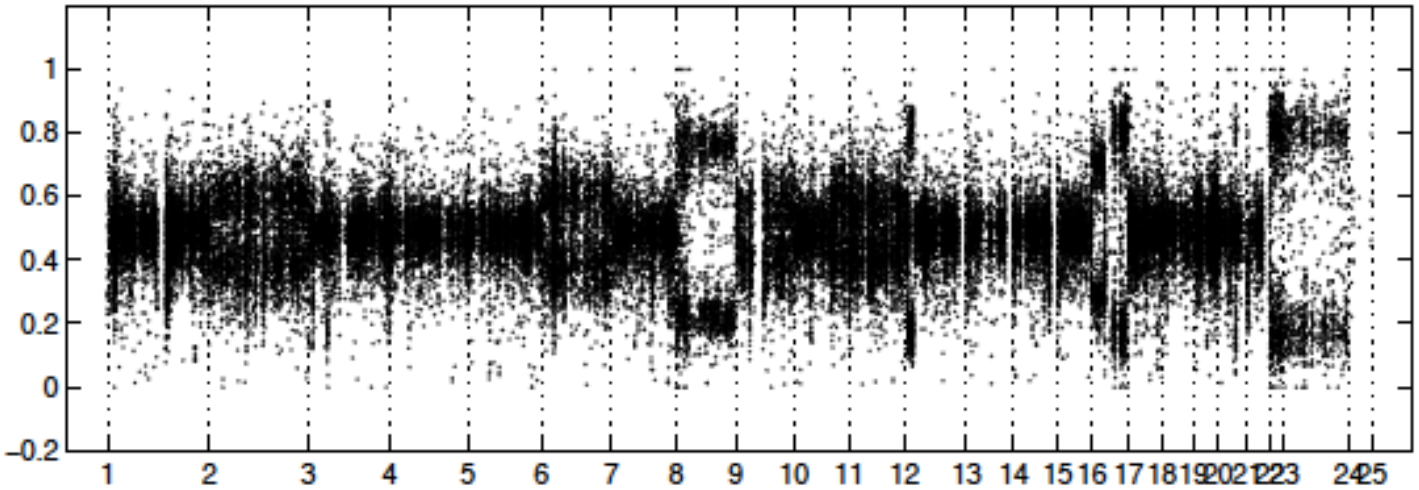

279\_ucsc.edu\_BRCA.IlluminaGA\_DNASeq.Level\_2.4.0.0\_TCGA-A8-A082\_W  
germline-het

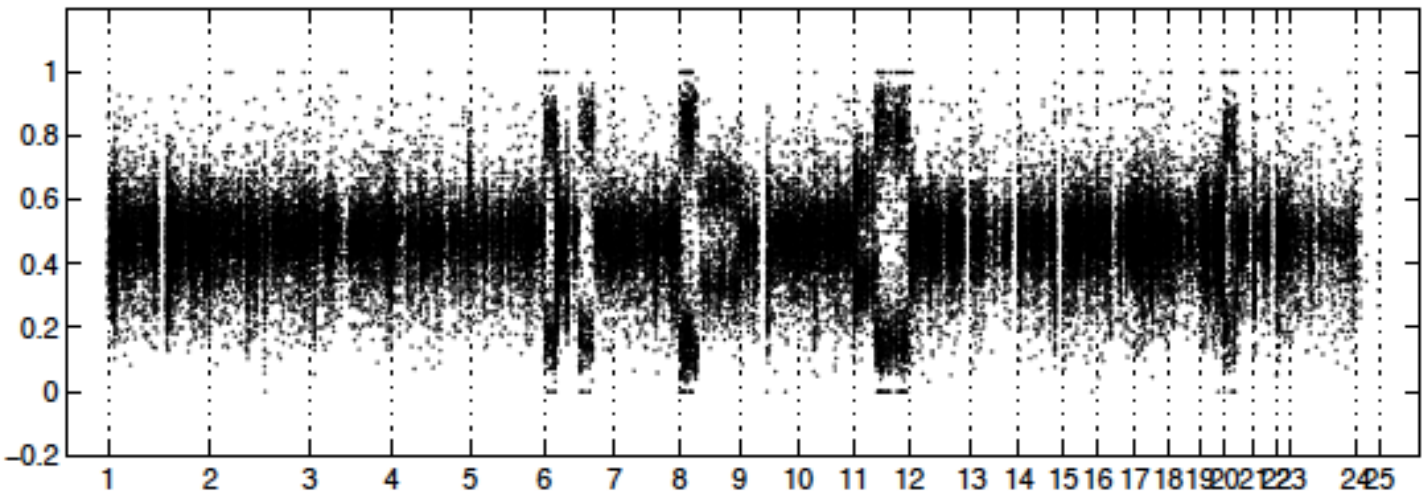

280\_ucsc.edu\_BRCA.IlluminaGA\_DNASeq.Level\_2.10.0.0\_TCGA-BH-A0HK\_W  
germline-het

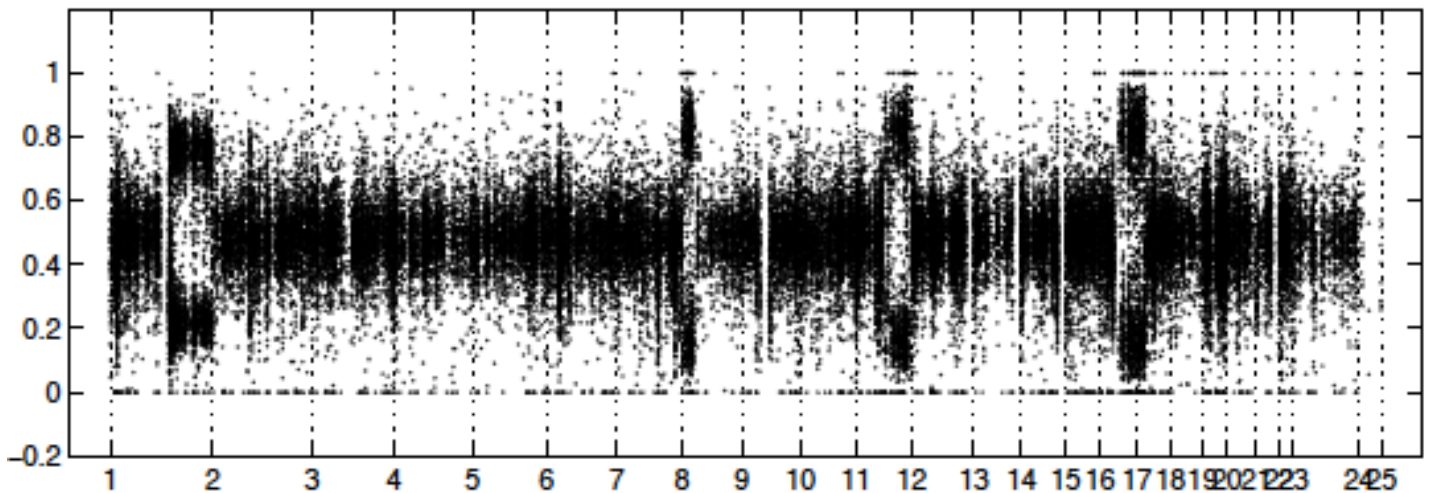

281\_ucsc.edu\_BRCA.IlluminaGA\_DNASeq.Level\_2.6.0.0\_TCGA-AO-A12B\_D  
germline-het

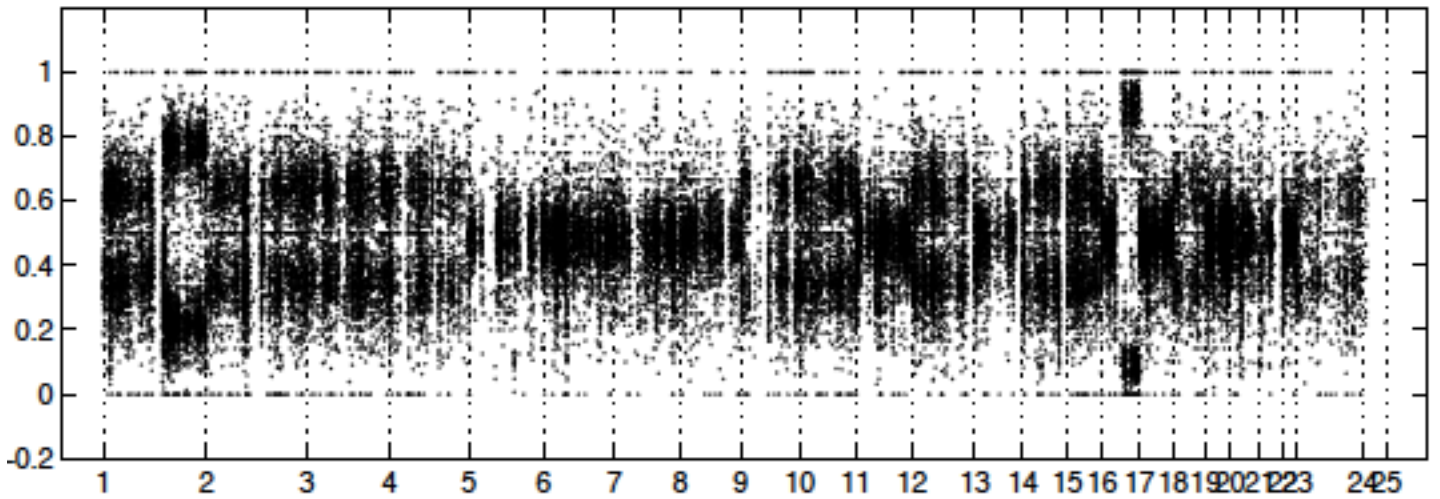

282\_ucsc.edu\_BRCA.IlluminaGA\_DNASeq.Level\_2.10.0.0\_TCGA-BH-A1EO\_D  
germline-het

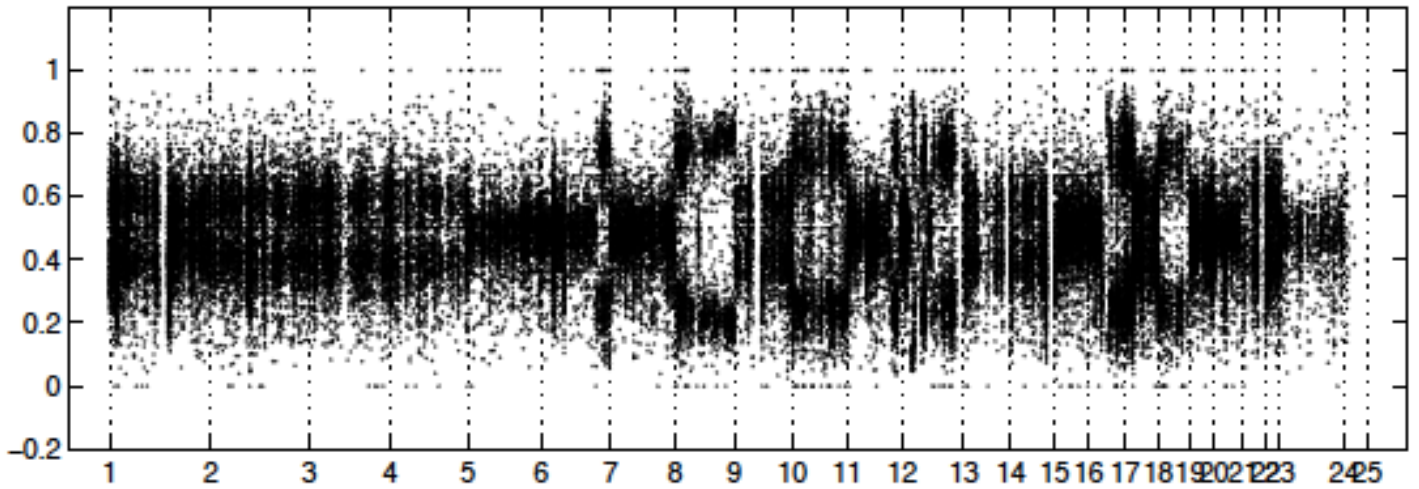

283\_ucsc.edu\_BRCA.IlluminaGA\_DNASeq.Level\_2.5.0.0\_TCGA-AN-A03X\_W  
germline-het

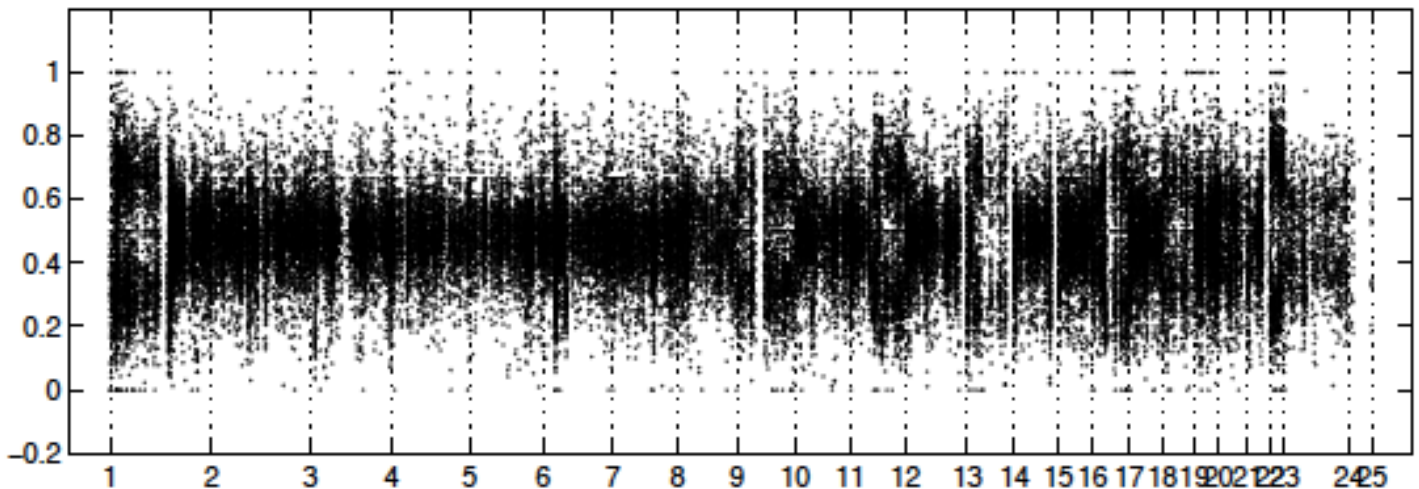



284\_ucsc.edu\_BRCA.IlluminaGA\_DNASeq.Level\_2.10.0.0\_TCGA-BH-A0C7\_D  
germline-het

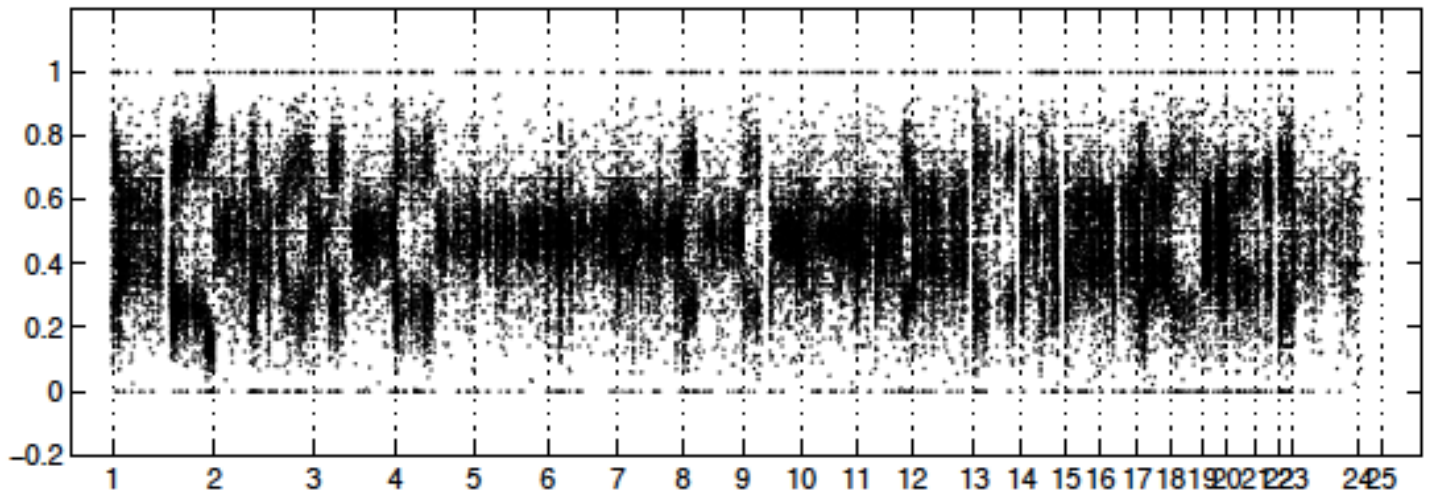

285\_ucsc.edu\_BRCA.IlluminaGA\_DNASeq.Level\_2.10.0.0\_TCGA-BH-A0B4\_W  
germline-het

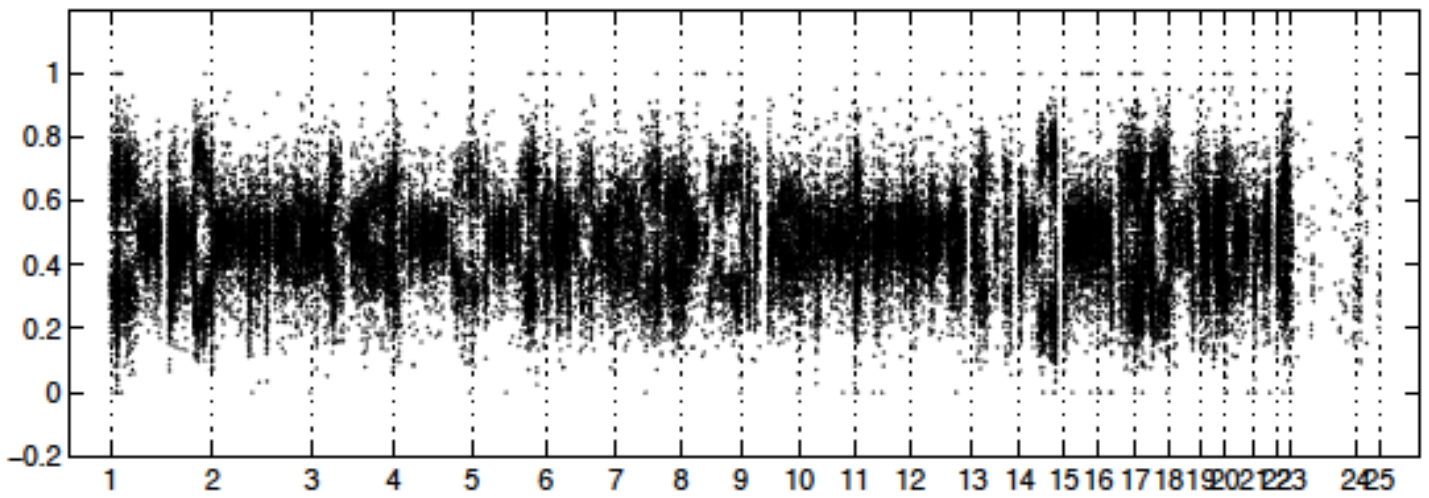

286\_ucsc.edu\_BRCA.IlluminaGA\_DNASeq.Level\_2.10.0.0\_TCGA-BH-A0DL\_D  
germline-het

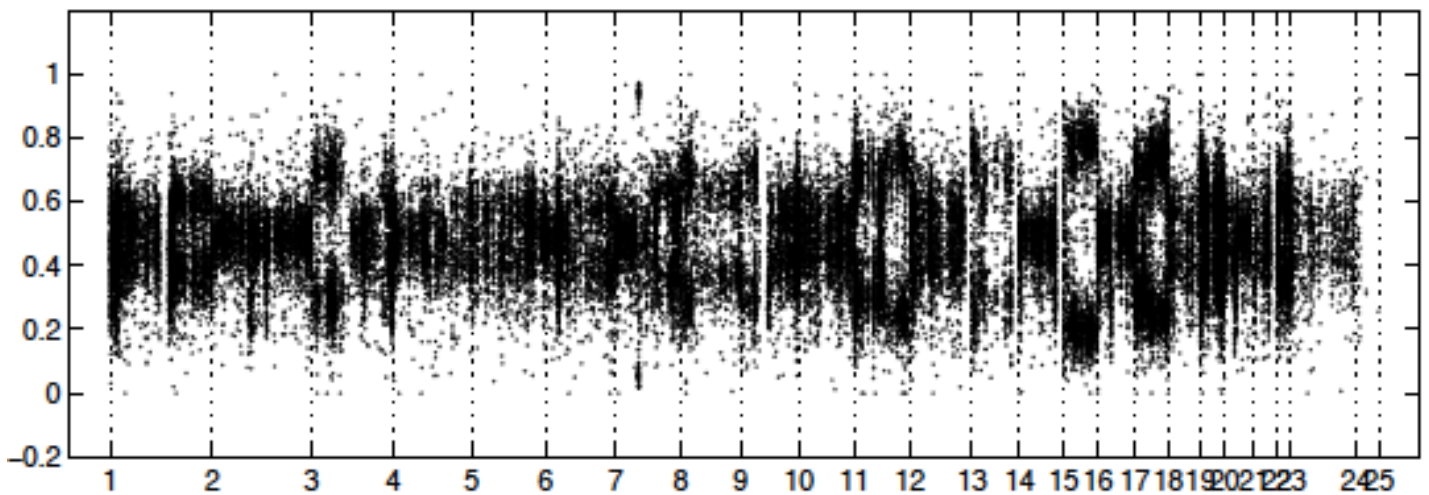

287\_ucsc.edu\_BRCA.IlluminaGA\_DNASeq.Level\_2.4.0.0\_TCGA-A8-A083\_W  
germline-het

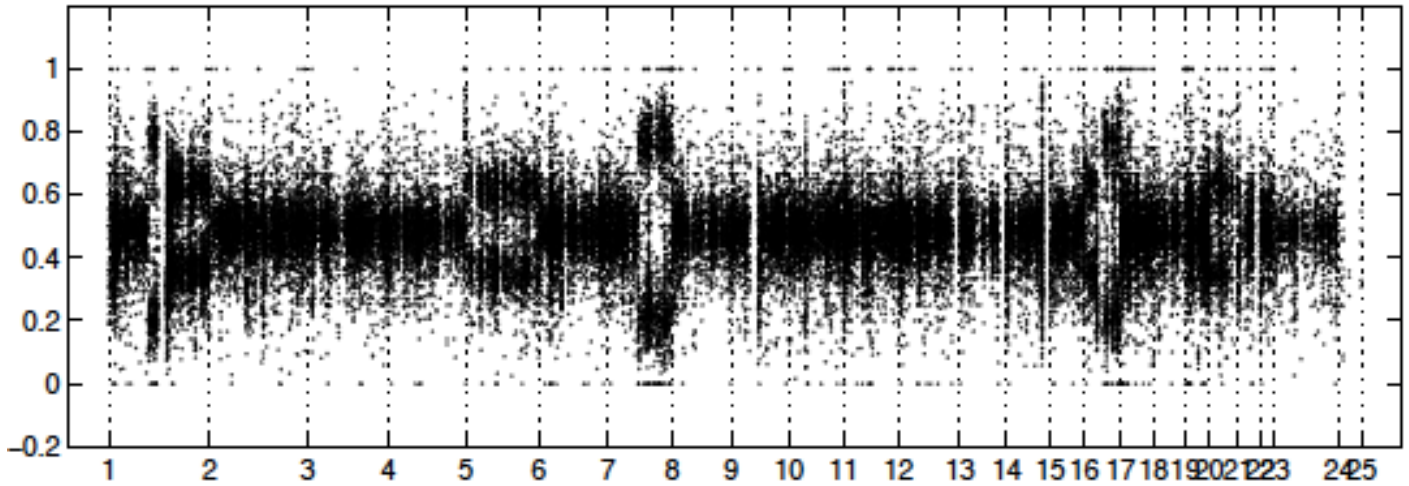

288\_ucsc.edu\_BRCA.IlluminaGA\_DNASeq.Level\_2.4.0.0\_TCGA-A8-A0AD\_W  
germline-het

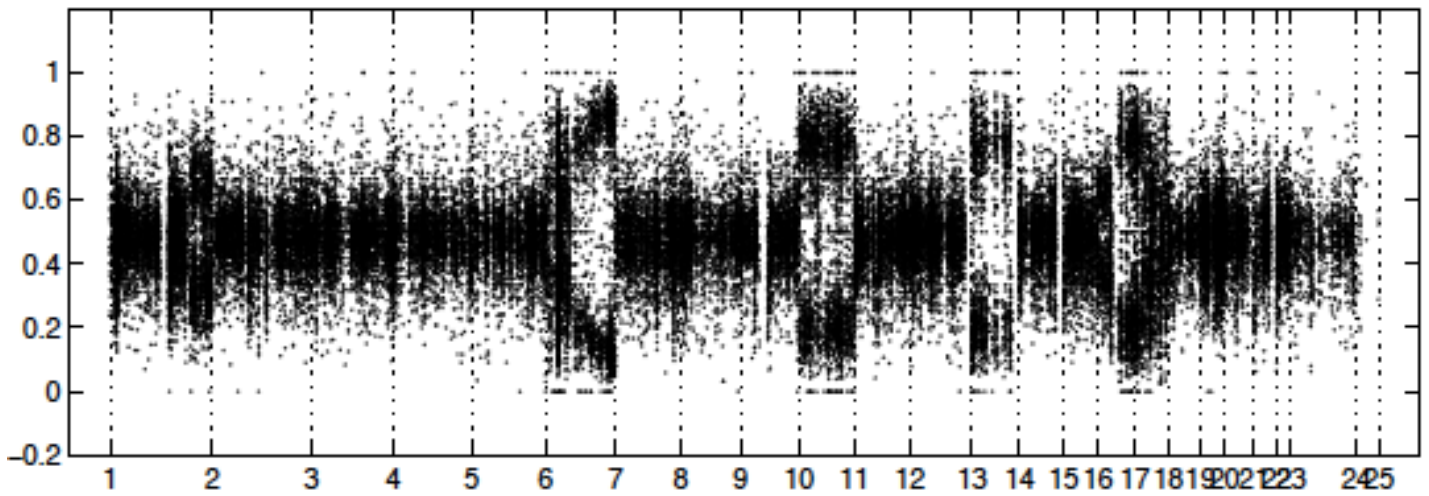

289\_ucsc.edu\_BRCA.IlluminaGA\_DNASeq.Level\_2.4.0.0\_TCGA-A8-A095\_W  
germline-het

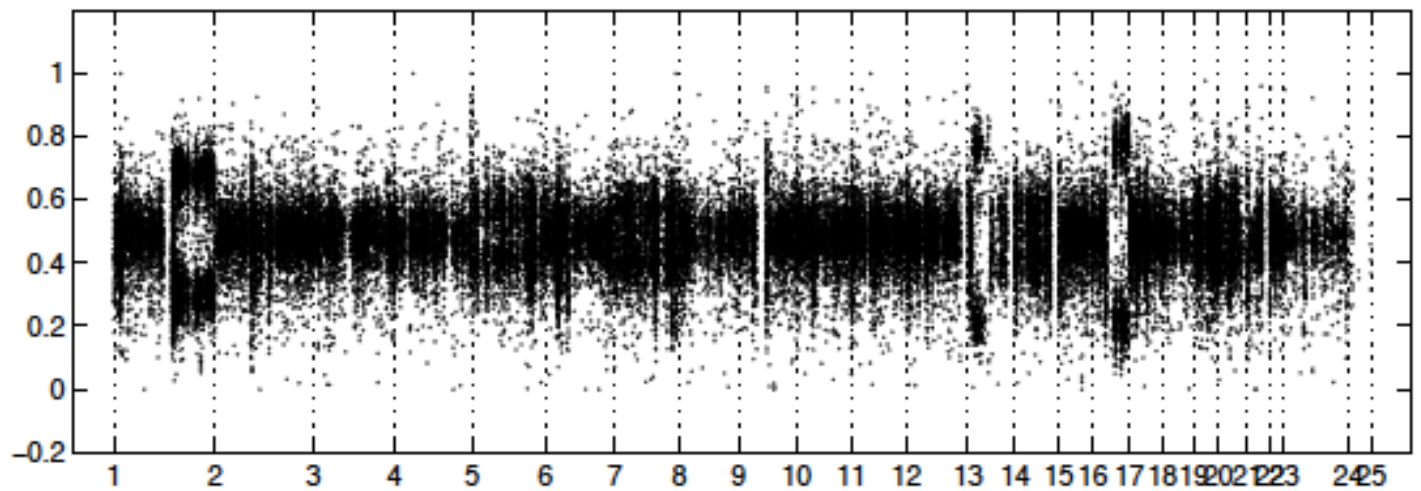

290\_ucsc.edu\_BRCA.IlluminaGA\_DNASeq.Level\_2.3.0.0\_TCGA-A7-A0D9\_W  
germline-het

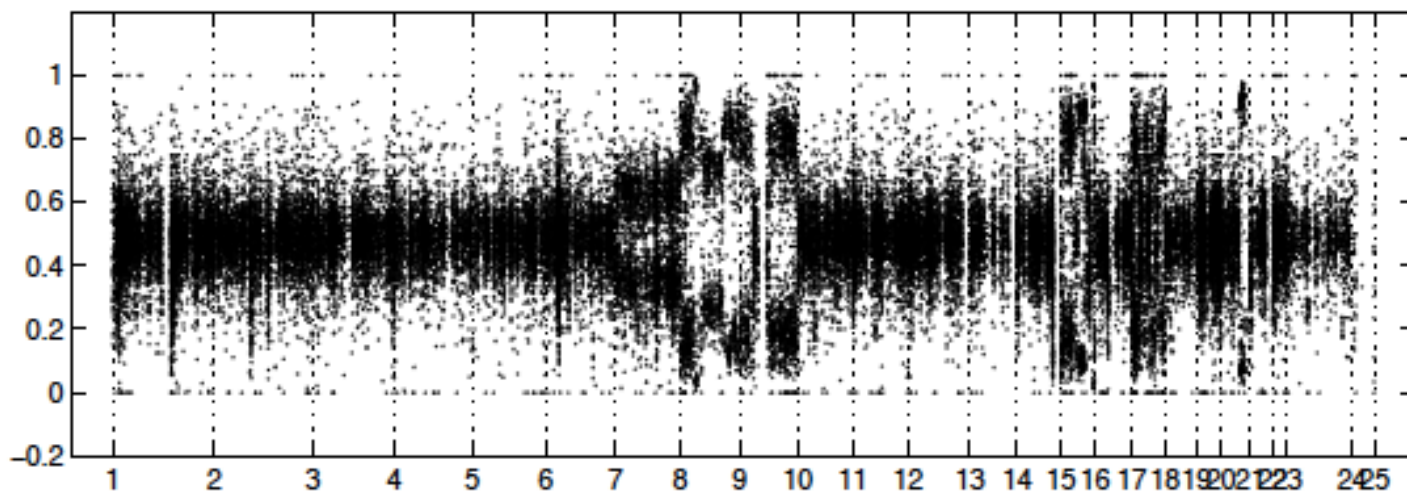

291\_ucsc.edu\_BRCA.IlluminaGA\_DNASeq.Level\_2.5.0.0\_TCGA-AN-A0XW\_D  
germline-het

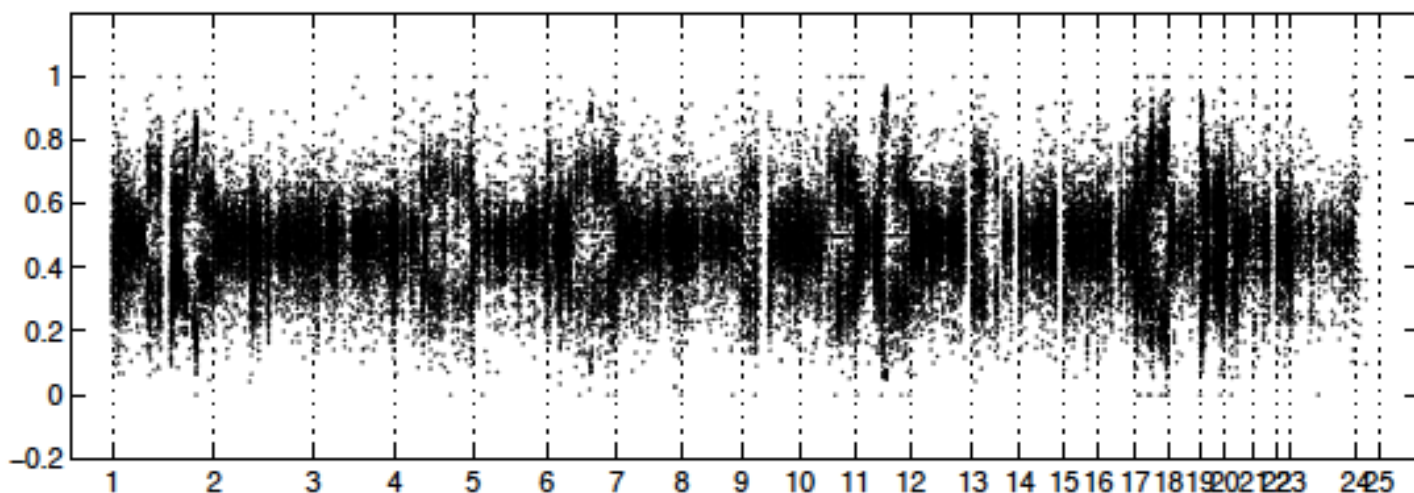

292\_ucsc.edu\_BRCA.IlluminaGA\_DNASeq.Level\_2.10.0.0\_TCGA-BH-A0E2\_W  
germline-het

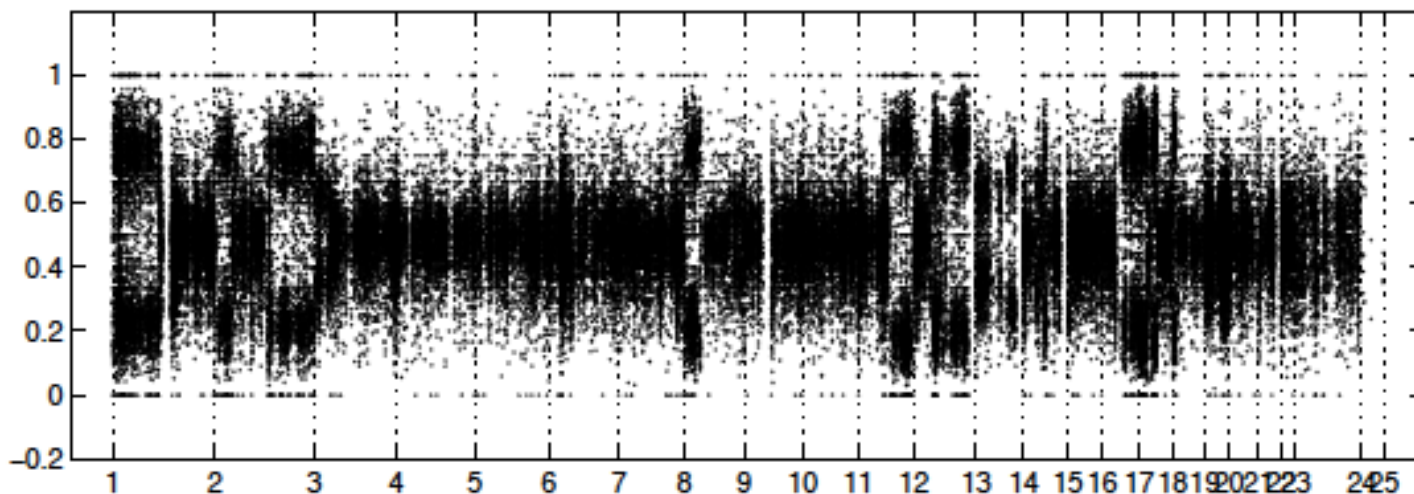

293\_ucsc.edu\_BRCA.IlluminaGA\_DNASeq.Level\_2.9.0.0\_TCGA-B6-A0RL\_D  
germline-het

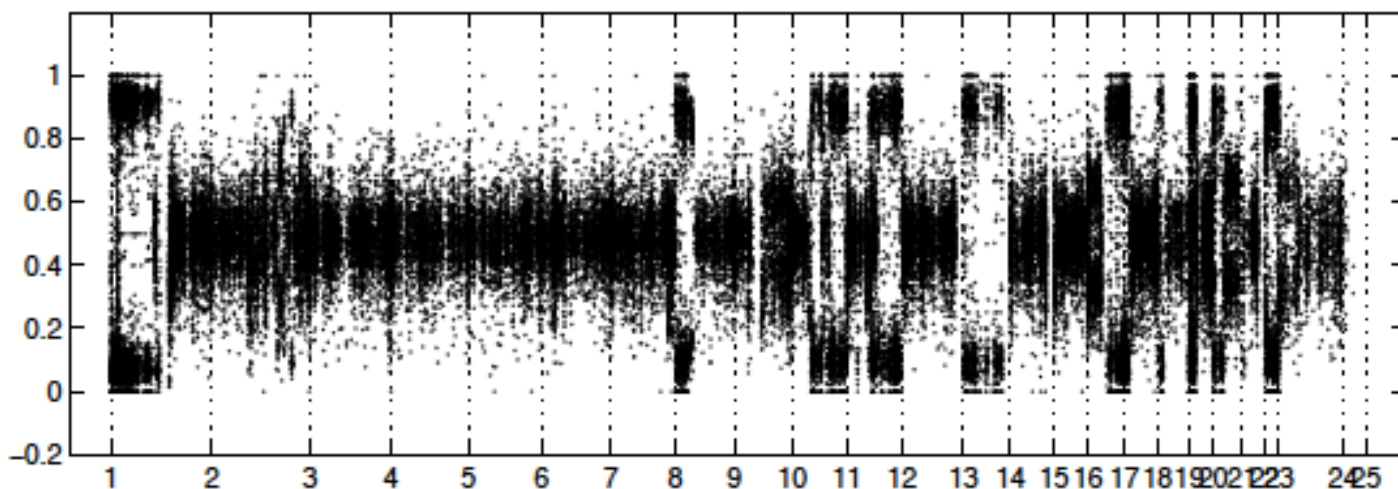

294\_ucsc.edu\_BRCA.IlluminaGA\_DNASeq.Level\_2.4.0.0\_TCGA-A8-A07O\_W  
germline-het

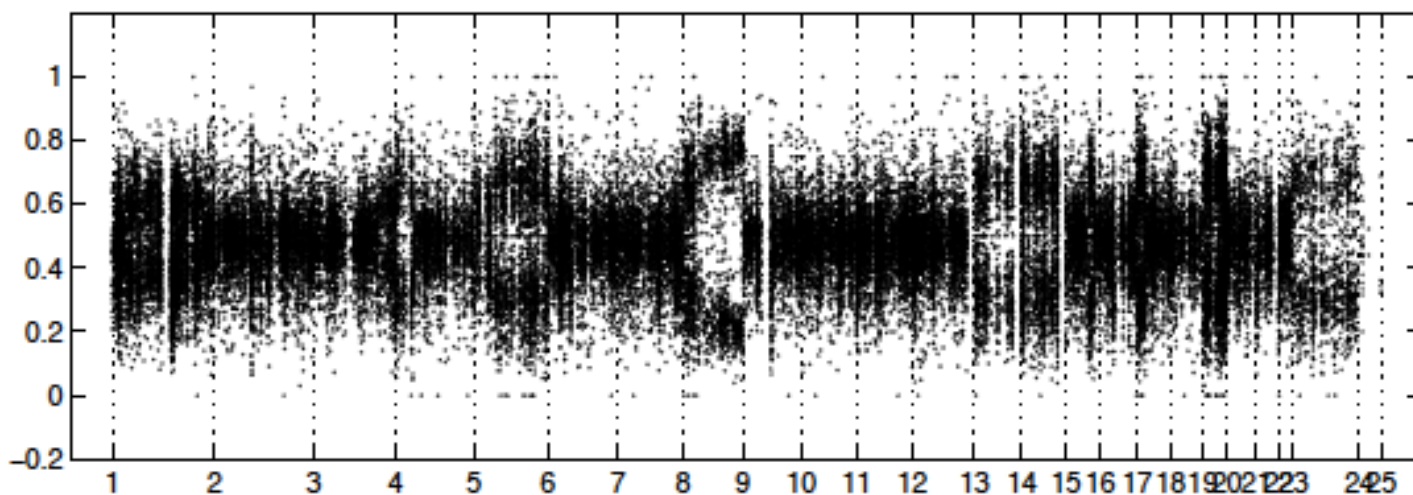

295\_ucsc.edu\_BRCA.IlluminaGA\_DNASeq.Level\_2.11.0.0\_TCGA-C8-A12Y\_D  
germline-het

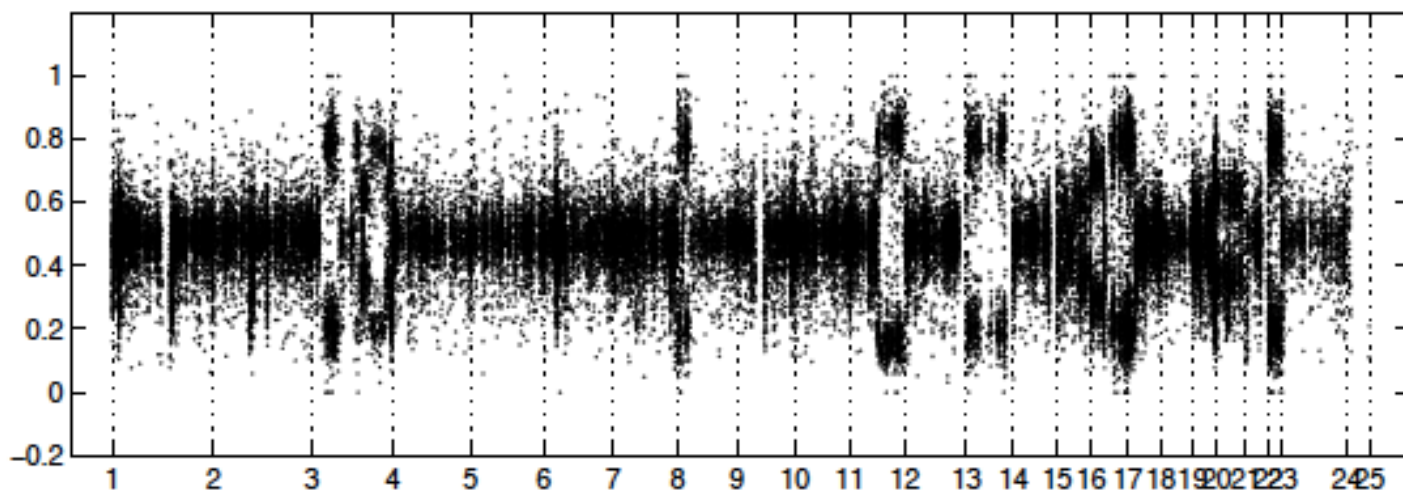

296\_ucsc.edu\_BRCA.IlluminaGA\_DNASeq.Level\_2.10.0.0\_TCGA-BH-A18S\_D  
germline-het

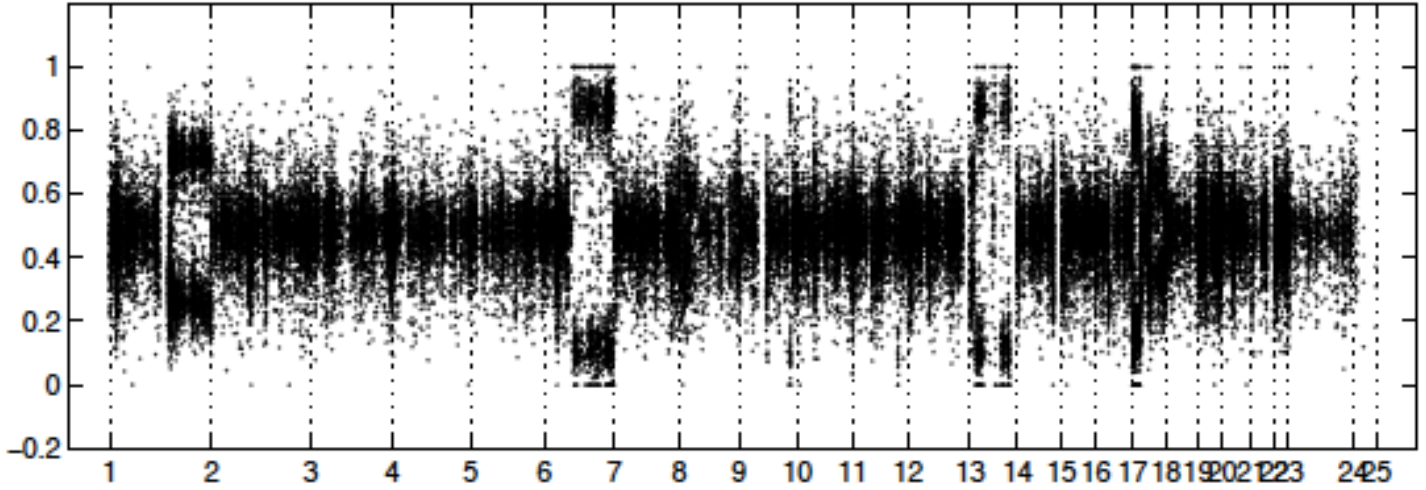

297\_ucsc.edu\_BRCA.IlluminaGA\_DNASeq.Level\_2.2.0.0\_TCGA-A2-A04V\_W  
germline-het

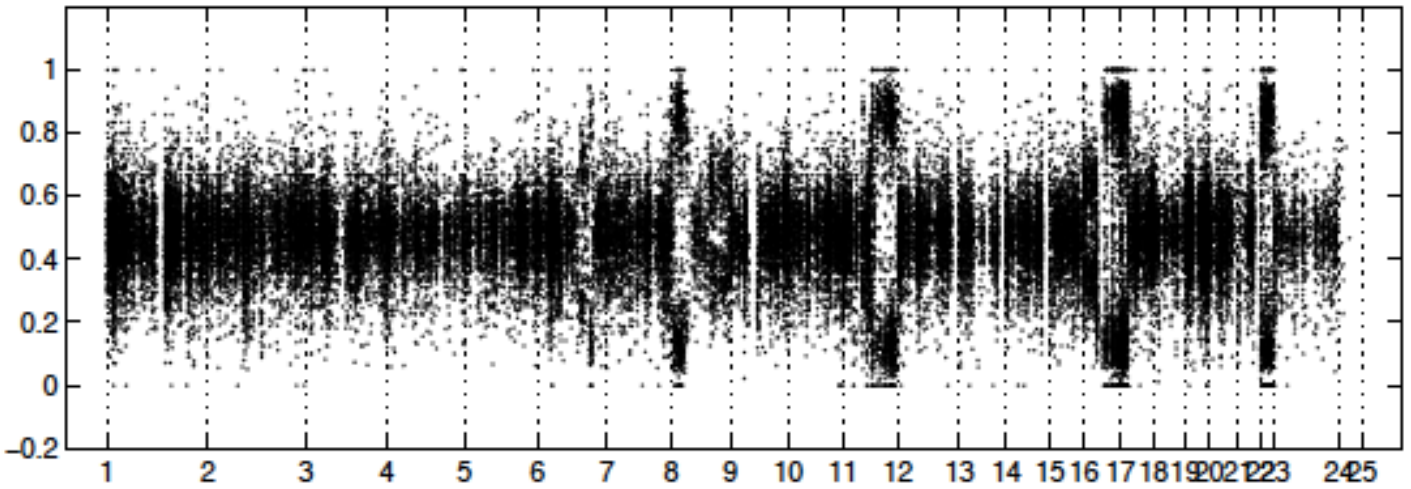

298\_ucsc.edu\_BRCA.IlluminaGA\_DNASeq.Level\_2.4.0.0\_TCGA-A8-A0A4\_W  
germline-het

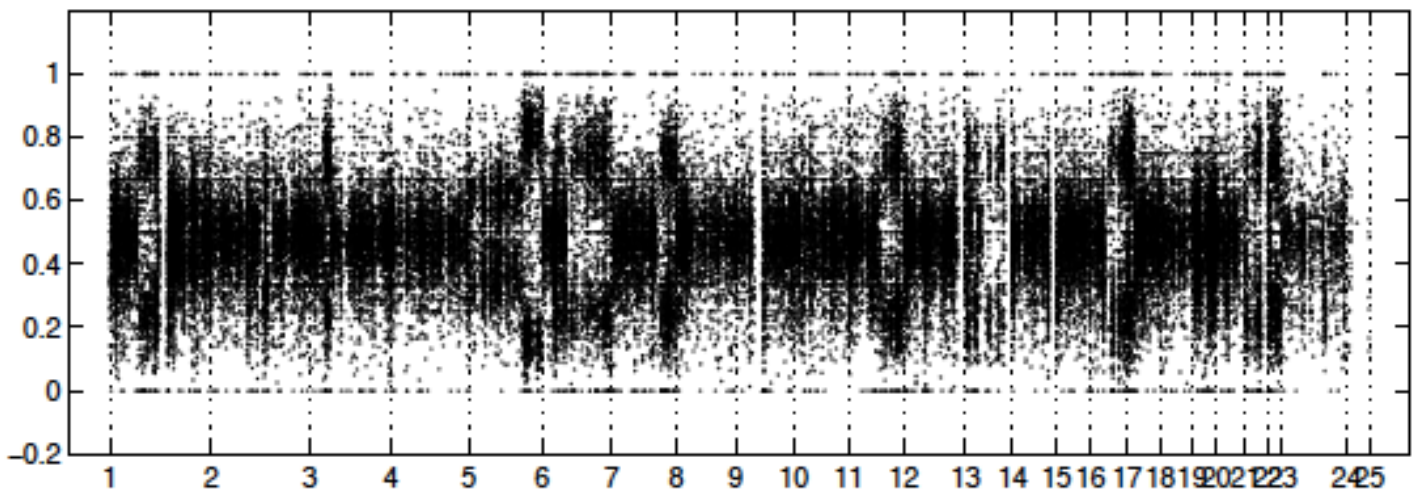

299\_ucsc.edu\_BRCA.IlluminaGA\_DNASeq.Level\_2.9.0.0\_TCGA-B6-A0IN\_W  
germline-het

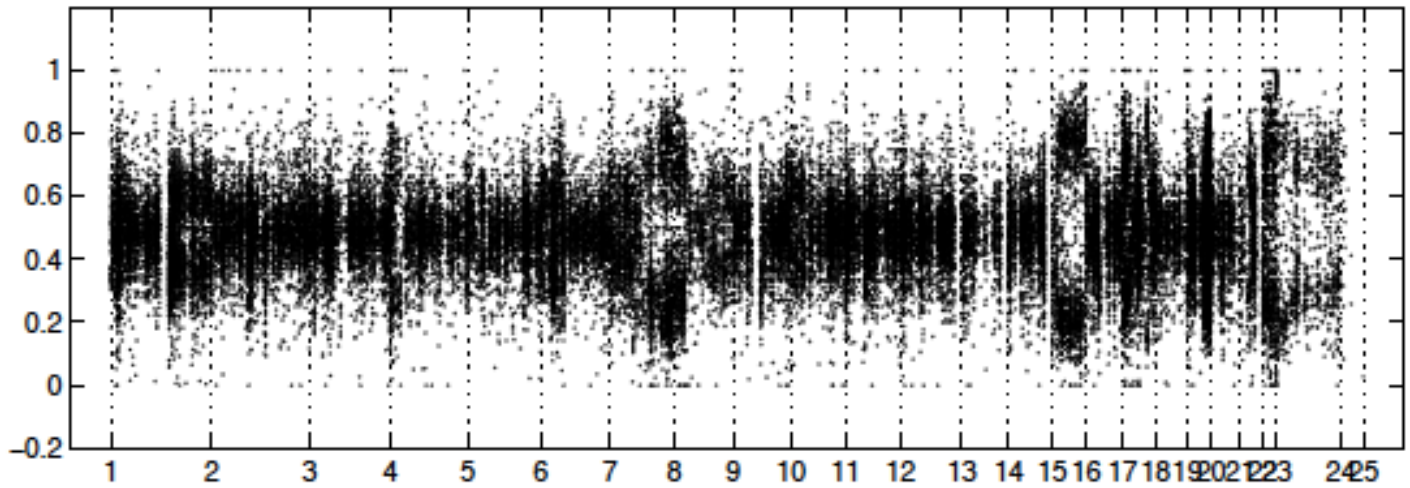

300\_ucsc.edu\_BRCA.IlluminaGA\_DNASeq.Level\_2.5.0.0\_TCGA-AN-A0XV\_D  
germline-het

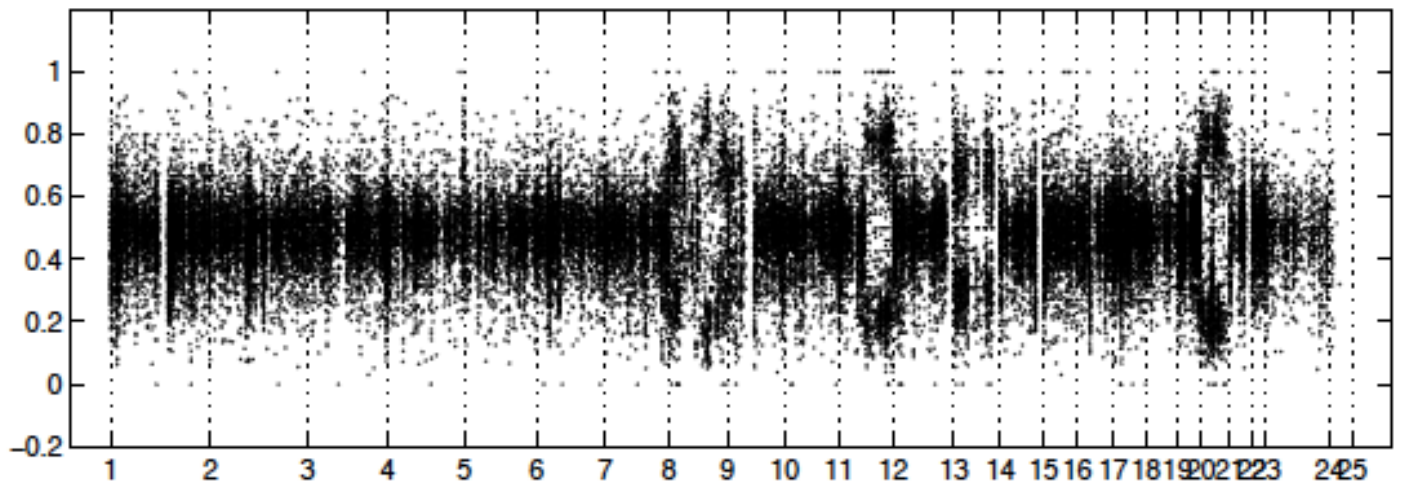

301\_ucsc.edu\_BRCA.IlluminaGA\_DNASeq.Level\_2.4.0.0\_TCGA-A8-A09G\_W  
germline-het

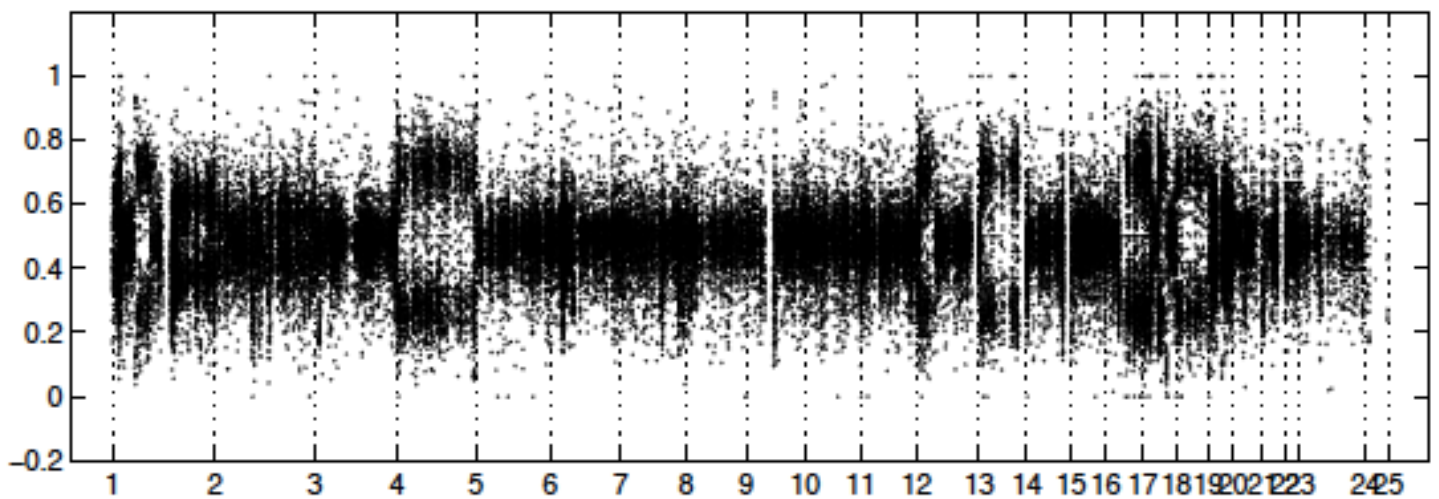

302\_ucsc.edu\_BRCA.IlluminaGA\_DNASeq.Level\_2.14.0.0\_TCGA-BH-A0BR\_W  
germline-het

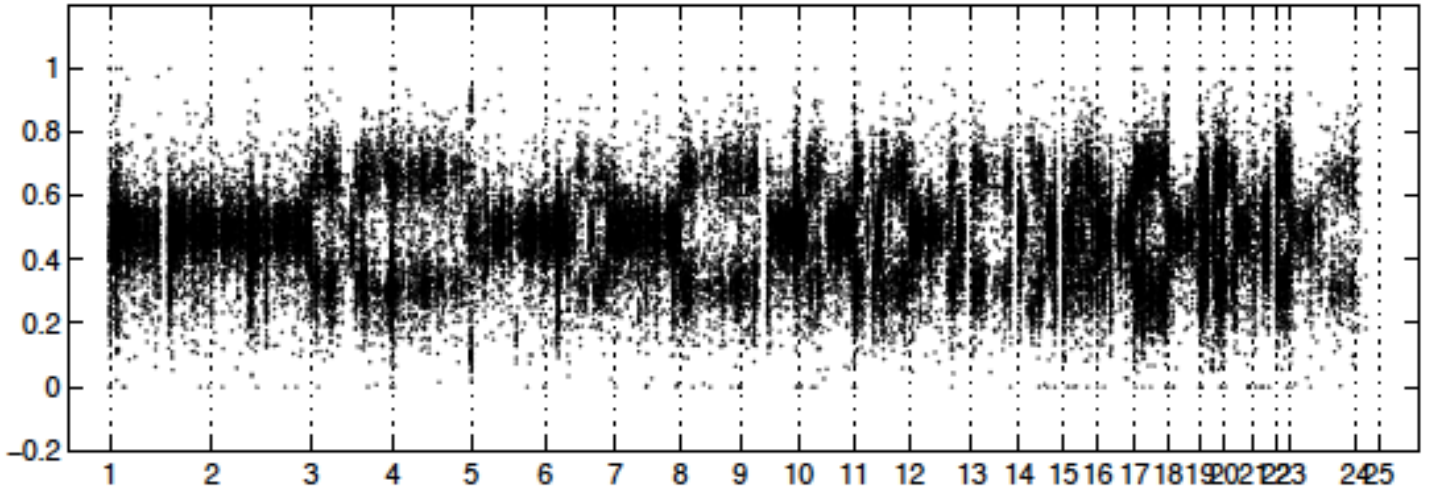

303\_ucsc.edu\_BRCA.IlluminaGA\_DNASeq.Level\_2.10.0.0\_TCGA-BH-A0BV\_W  
germline-het

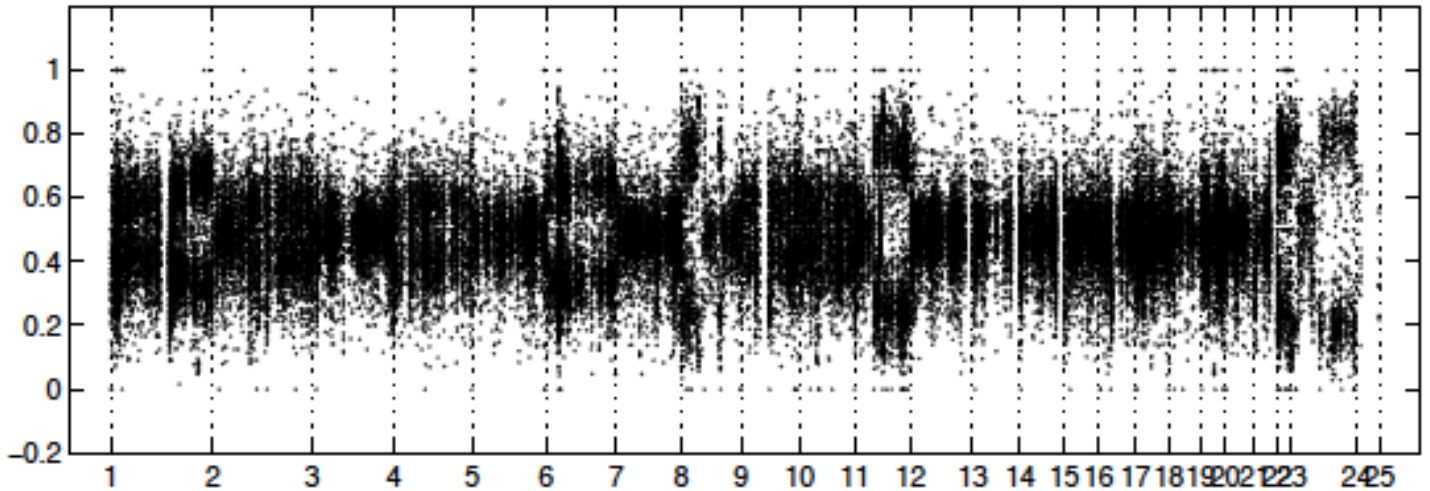

304\_ucsc.edu\_BRCA.IlluminaGA\_DNASeq.Level\_2.5.0.0\_TCGA-AN-A0XL\_D  
germline-het

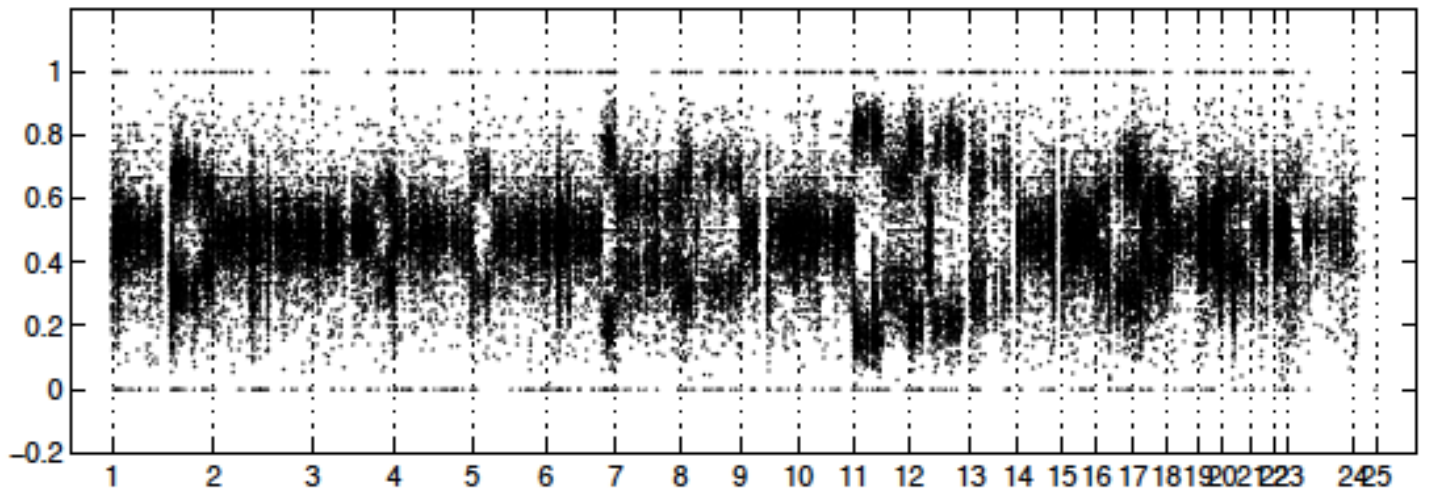

305\_ucsc.edu\_BRCA.IlluminaGA\_DNASeq.Level\_2.6.0.0\_TCGA-AO-A03M\_D  
germline-het

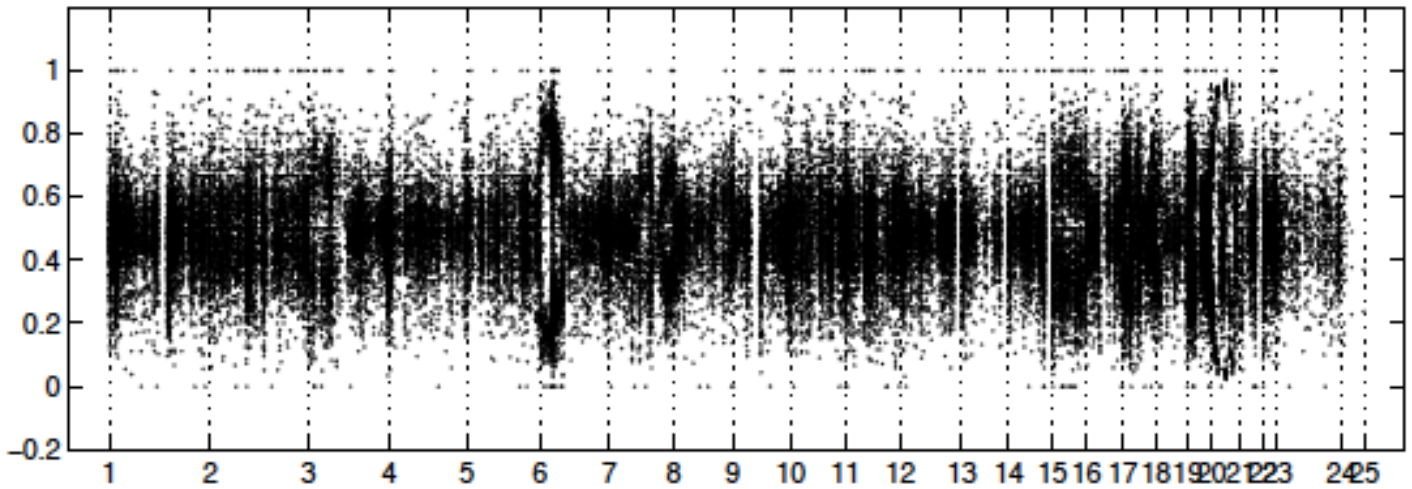

306\_ucsc.edu\_BRCA.IlluminaGA\_DNASeq.Level\_2.4.0.0\_TCGA-A8-A07J\_W  
germline-het

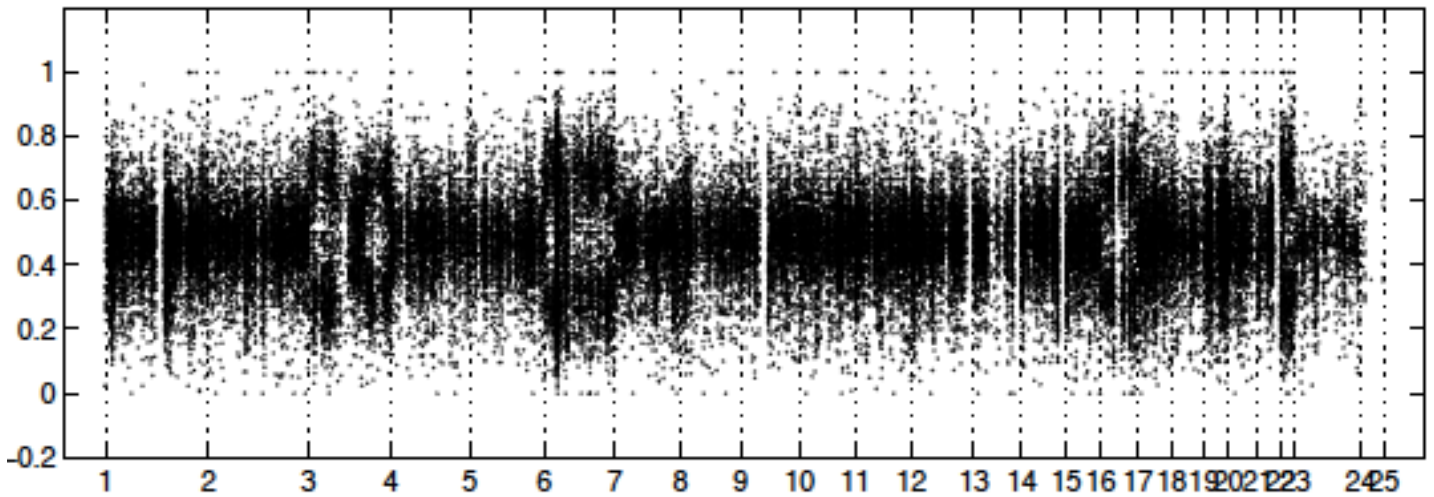

307\_ucsc.edu\_BRCA.IlluminaGA\_DNASeq.Level\_2.6.0.0\_TCGA-AO-A0JA\_W  
germline-het

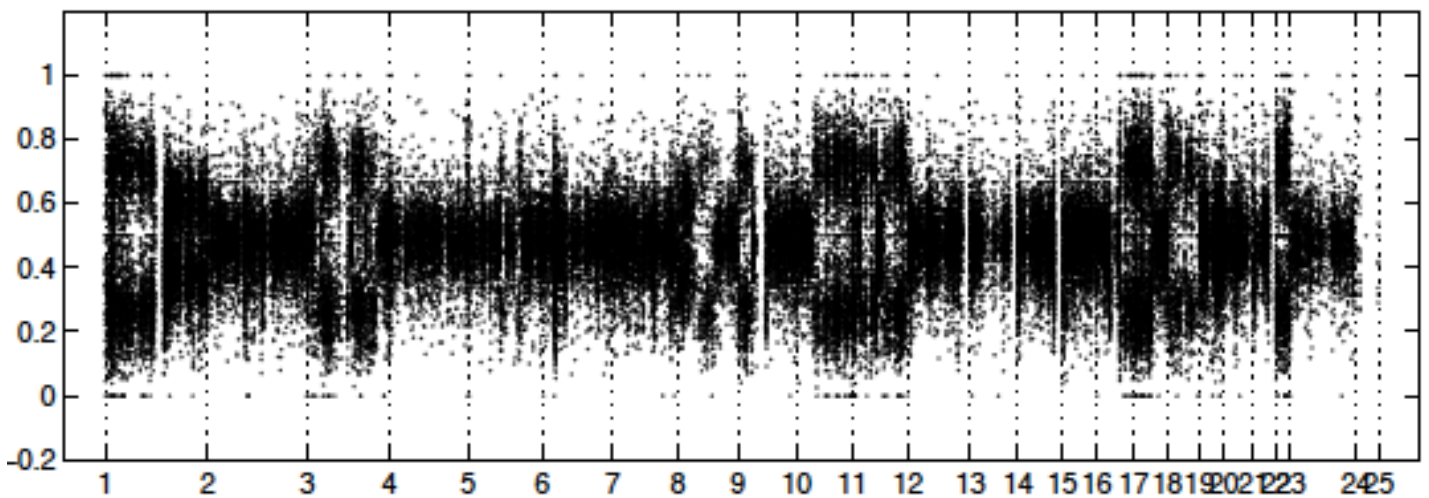



308\_ucsc.edu\_BRCA.IlluminaGA\_DNASeq.Level\_2.11.0.0\_TCGA-C8-A12O\_D  
germline-het

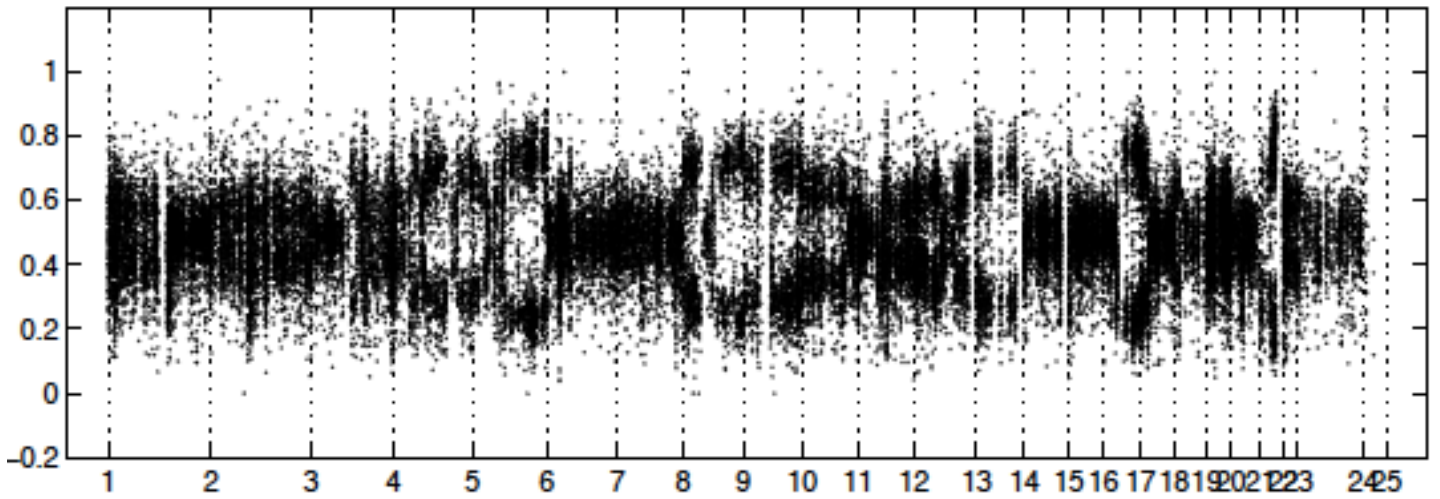

309\_ucsc.edu\_BRCA.IlluminaGA\_DNASeq.Level\_2.4.0.0\_TCGA-A8-A07F\_W  
germline-het

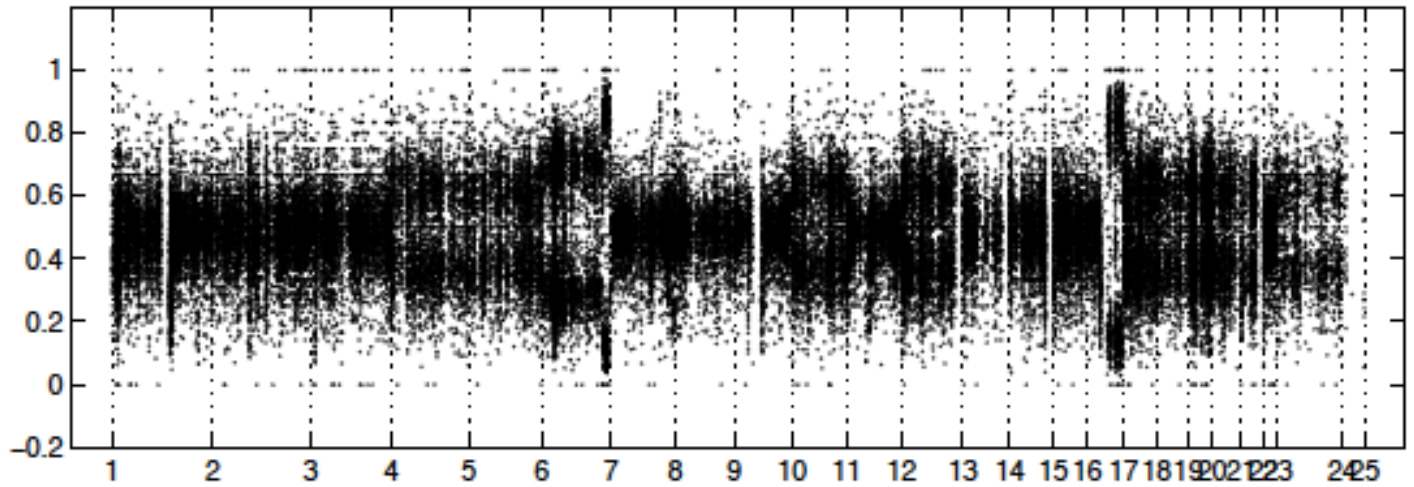

310\_ucsc.edu\_BRCA.IlluminaGA\_DNASeq.Level\_2.8.0.0\_TCGA-AR-A0TT\_D  
germline-het

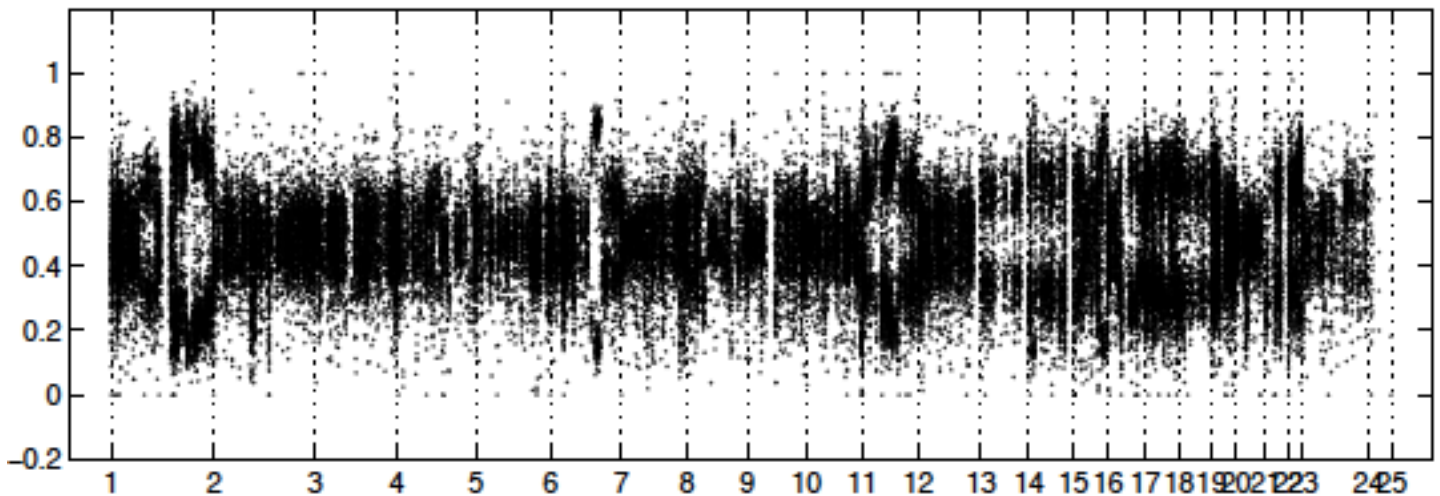

311\_ucsc.edu\_BRCA.IlluminaGA\_DNASeq.Level\_2.10.0.0\_TCGA-BH-A0DZ\_W  
germline-het

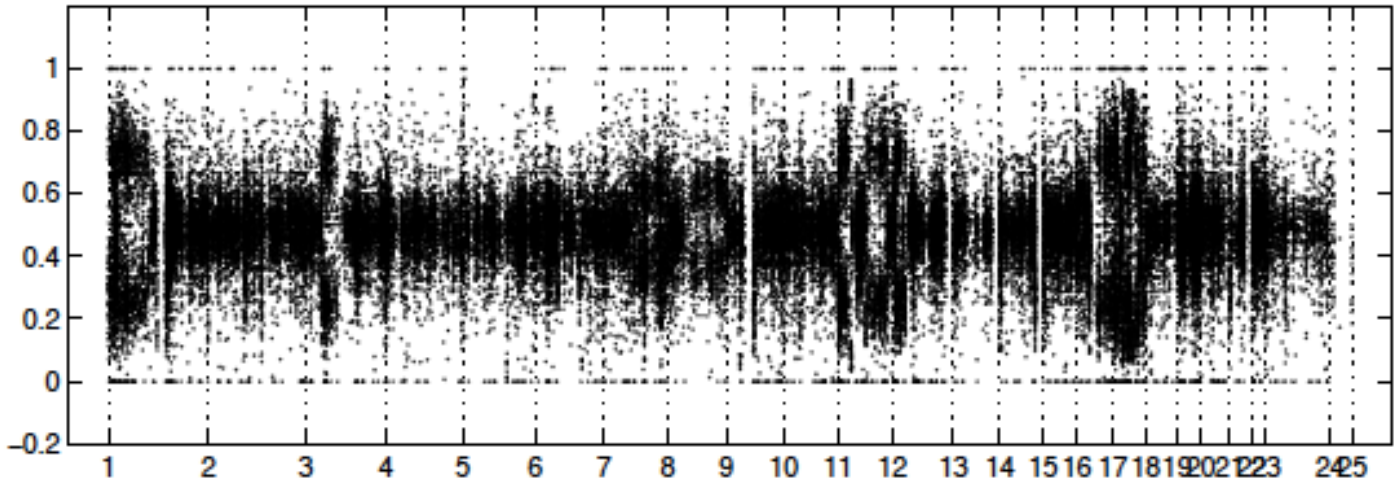

312\_ucsc.edu\_BRCA.IlluminaGA\_DNASeq.Level\_2.10.0.0\_TCGA-BH-A0DK\_W  
germline-het

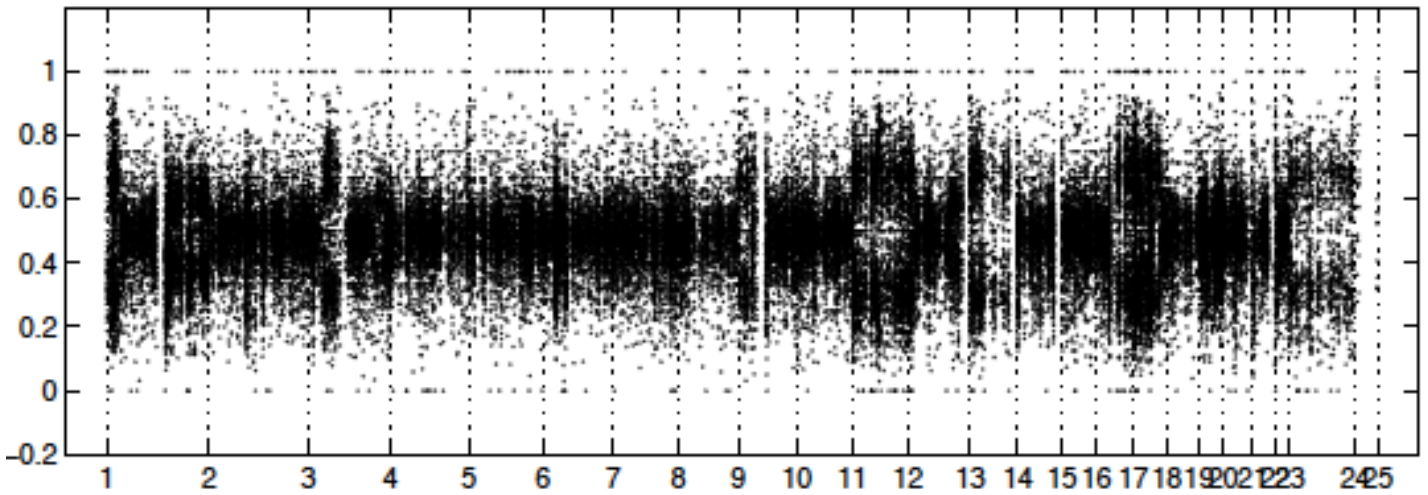

313\_ucsc.edu\_BRCA.IlluminaGA\_DNASeq.Level\_2.2.0.0\_TCGA-A2-A0EO\_W  
germline-het

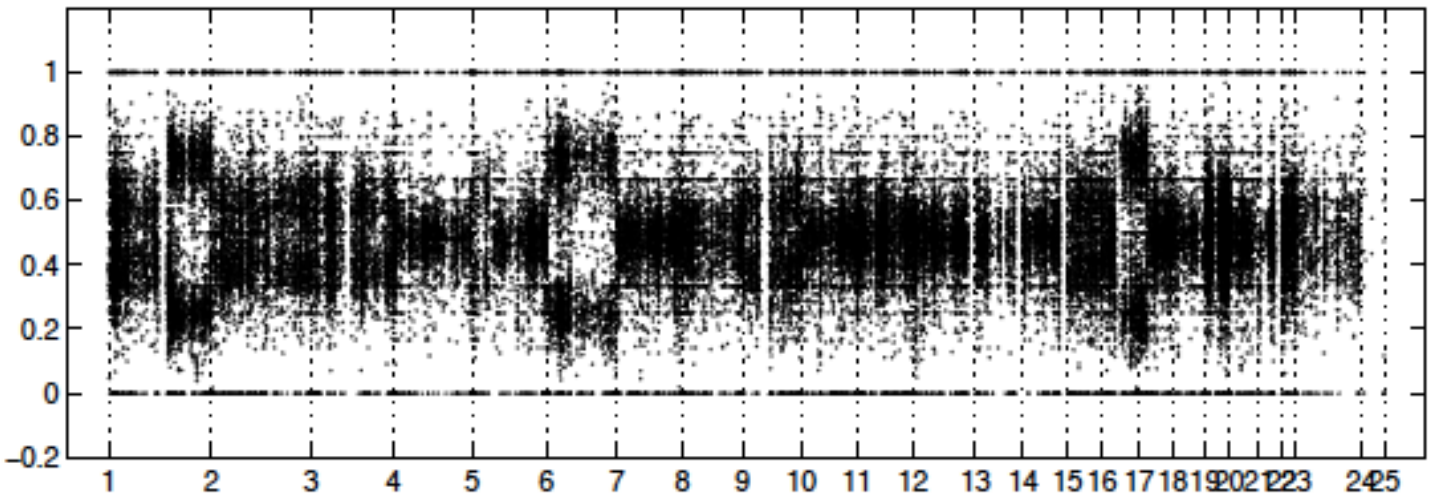

314\_ucsc.edu\_BRCA.IlluminaGA\_DNASeq.Level\_2.3.0.0\_TCGA-A7-A0DB\_W  
germline-het

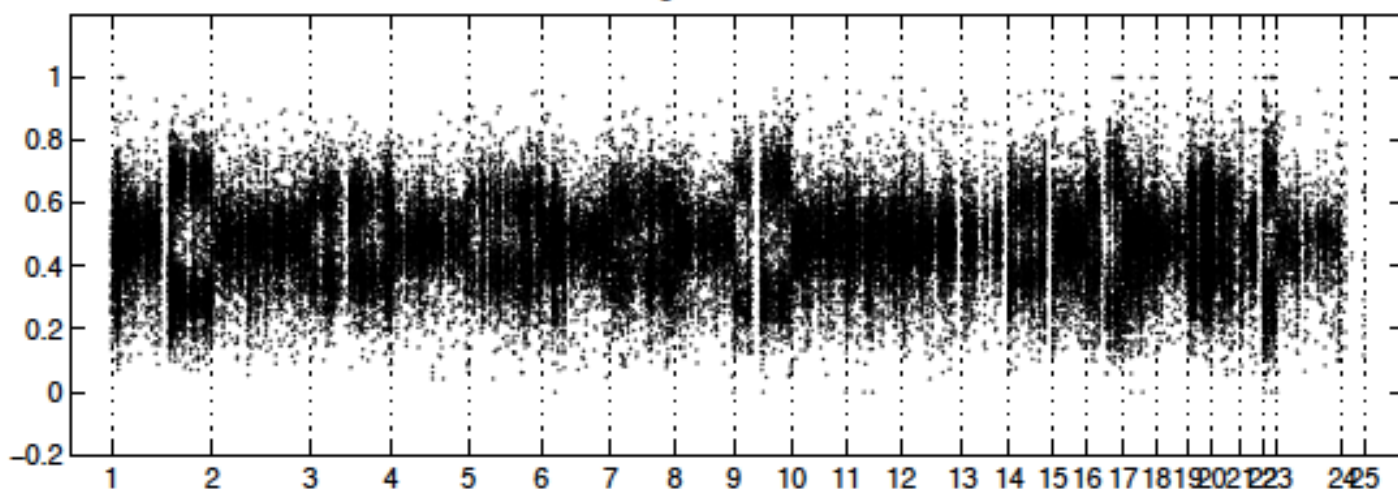

315\_ucsc.edu\_BRCA.IlluminaGA\_DNASeq.Level\_2.11.0.0\_TCGA-C8-A1HI\_D  
germline-het

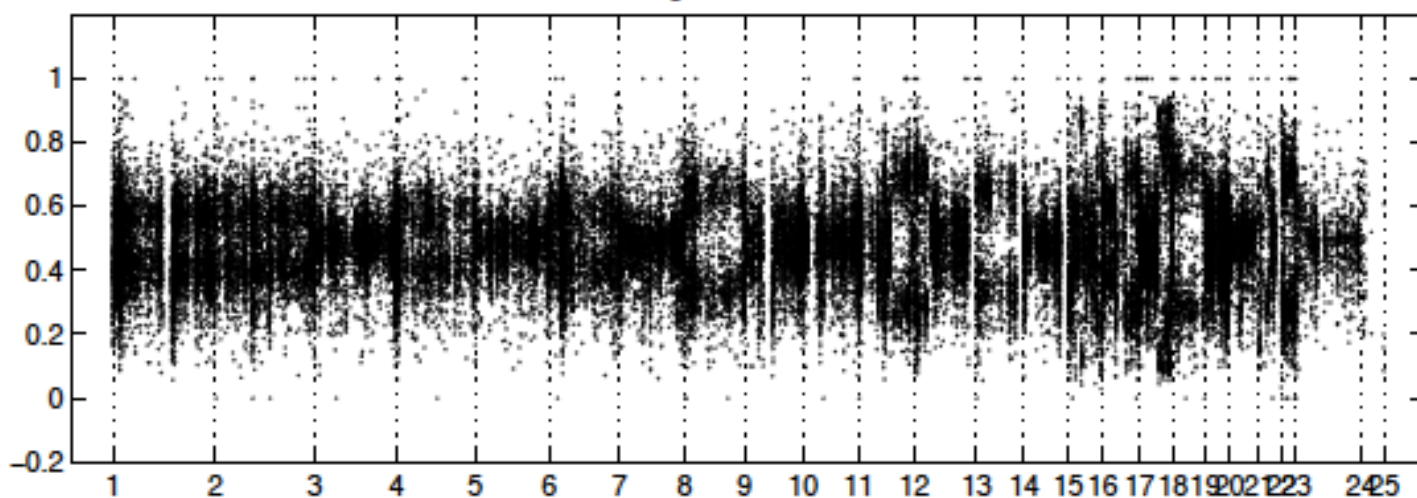

316\_ucsc.edu\_BRCA.IlluminaGA\_DNASeq.Level\_2.1.0.0\_TCGA-A1-A0SM\_D  
germline-het

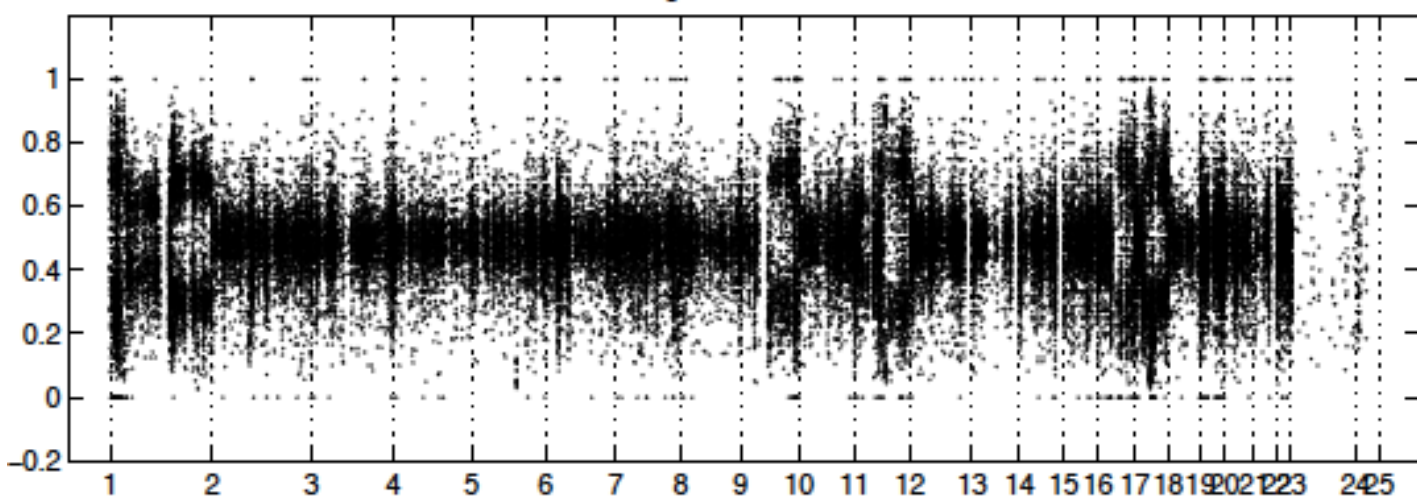

317\_ucsc.edu\_BRCA.IlluminaGA\_DNASeq.Level\_2.10.0.0\_TCGA-BH-A1ES\_D  
germline-het

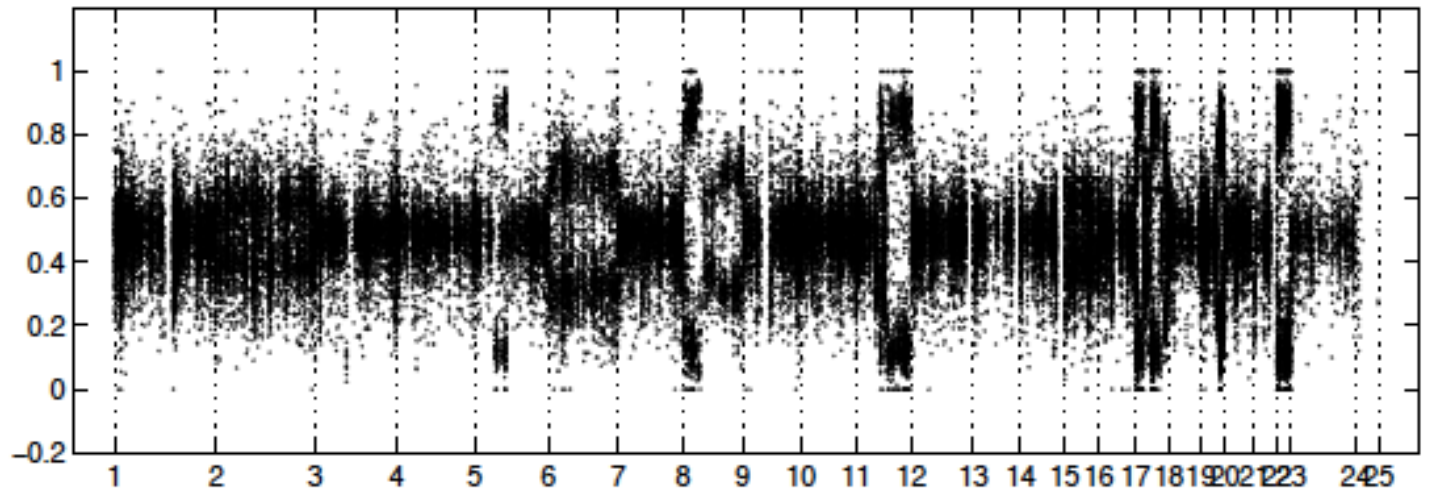

318\_ucsc.edu\_BRCA.IlluminaGA\_DNASeq.Level\_2.10.0.0\_TCGA-BH-A0DS\_W  
germline-het

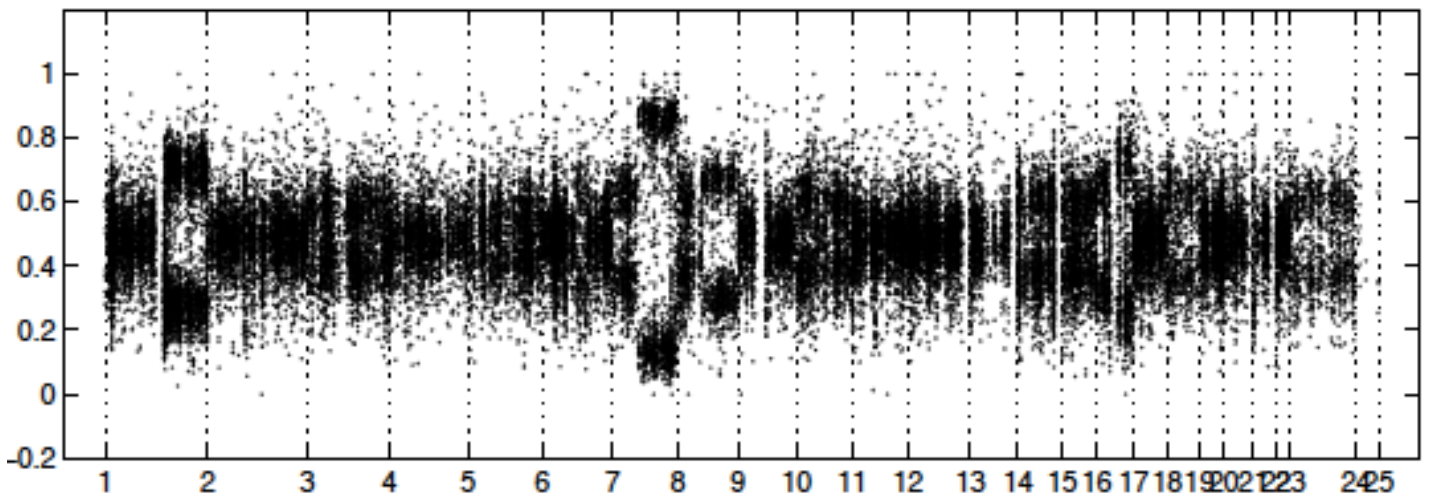

319\_ucsc.edu\_BRCA.IlluminaGA\_DNASeq.Level\_2.8.0.0\_TCGA-AR-A0U1\_D  
germline-het

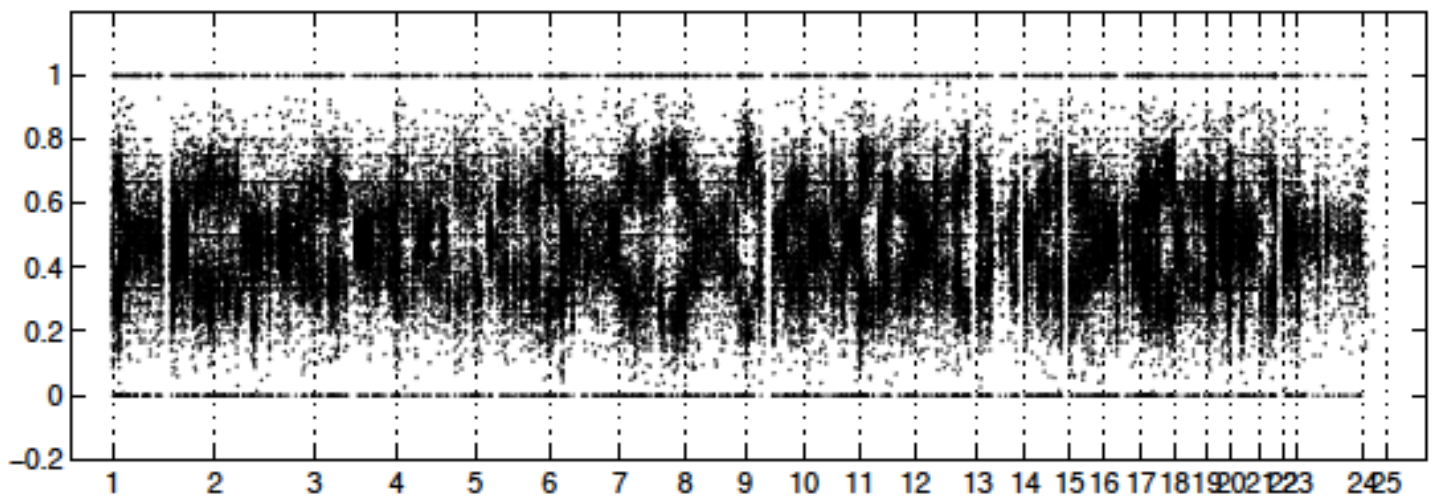

320\_ucsc.edu\_BRCA.IlluminaGA\_DNASeq.Level\_2.9.0.0\_TCGA-B6-A01A\_W  
germline-het

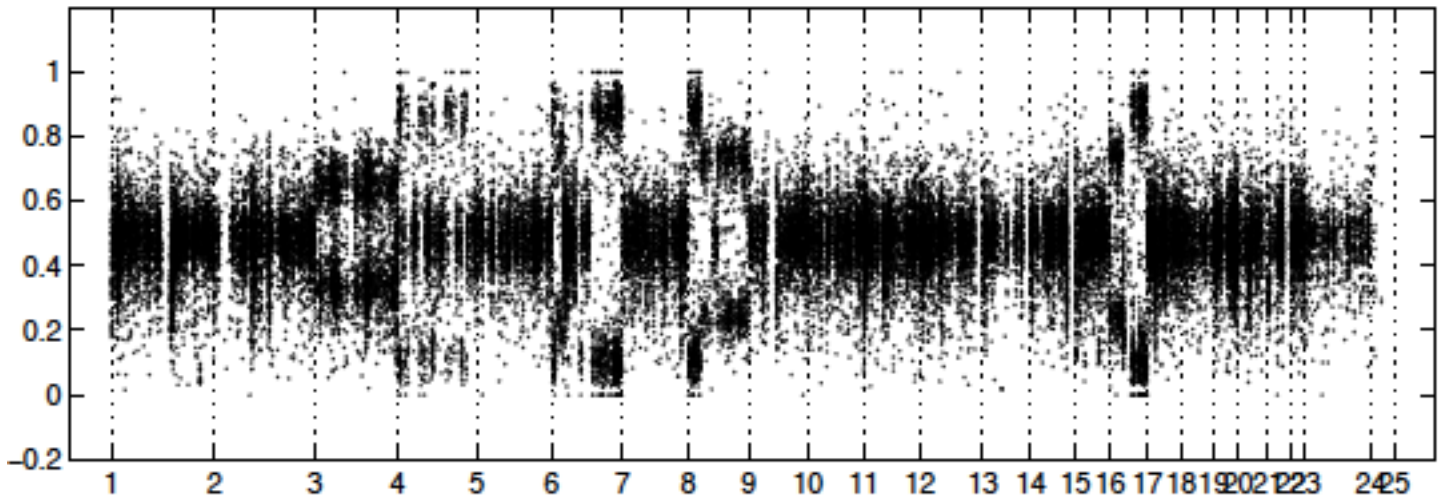

321\_ucsc.edu\_BRCA.IlluminaGA\_DNASeq.Level\_2.2.0.0\_TCGA-A2-A04X\_W  
germline-het

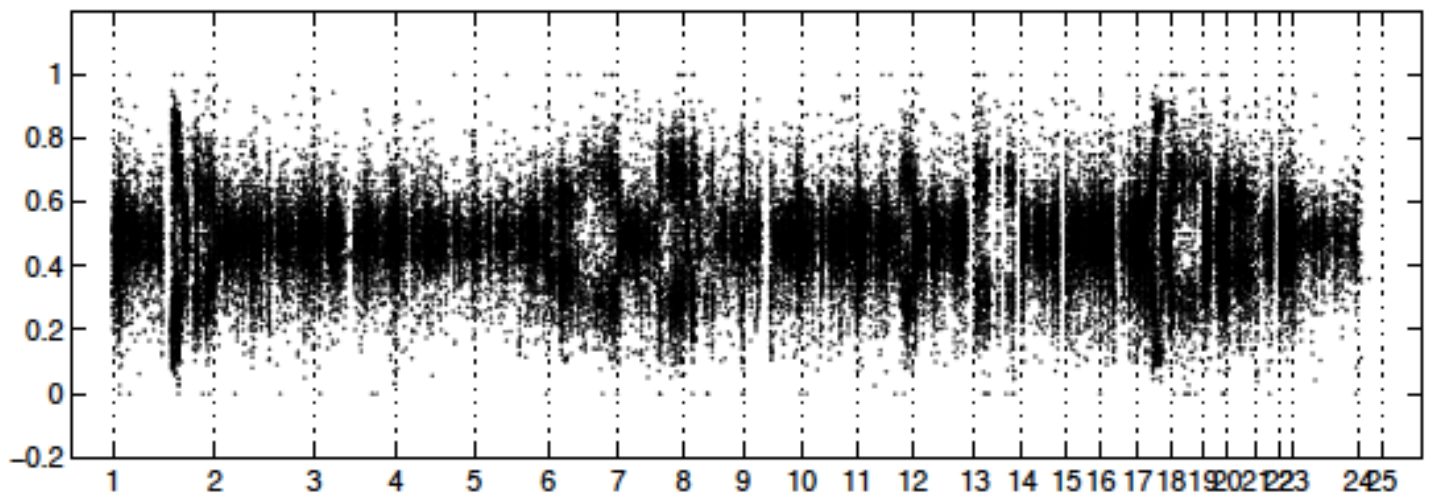

322\_ucsc.edu\_BRCA.IlluminaGA\_DNASeq.Level\_2.13.0.0\_TCGA-E2-A105\_D  
germline-het

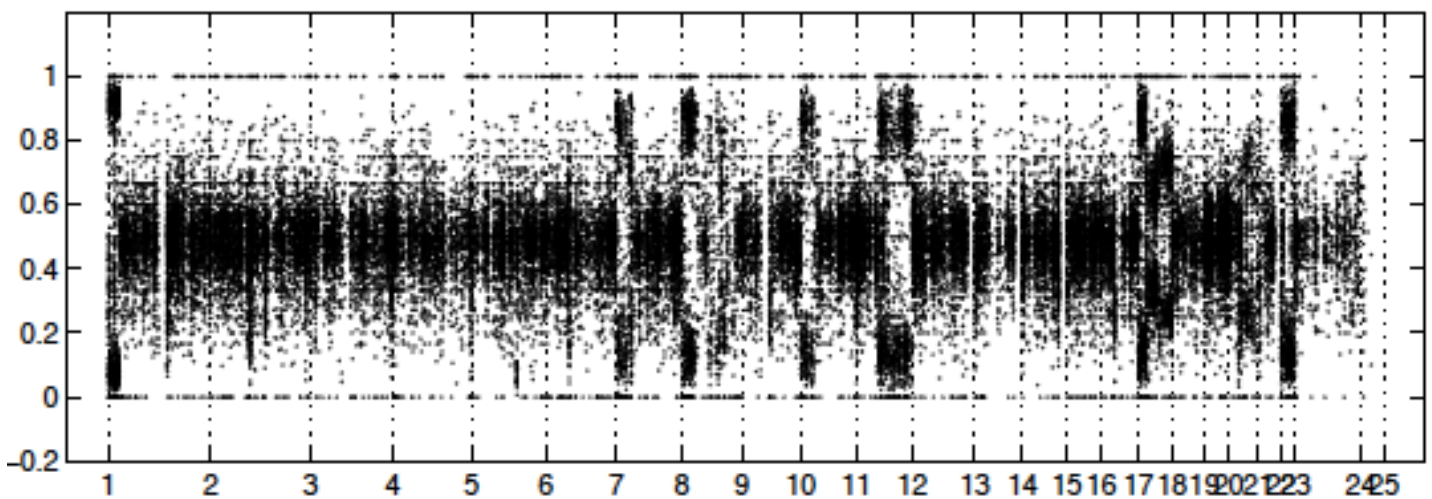

323\_ucsc.edu\_BRCA.IlluminaGA\_DNASeq.Level\_2.4.0.0\_TCGA-A8-A09X\_W  
germline-het

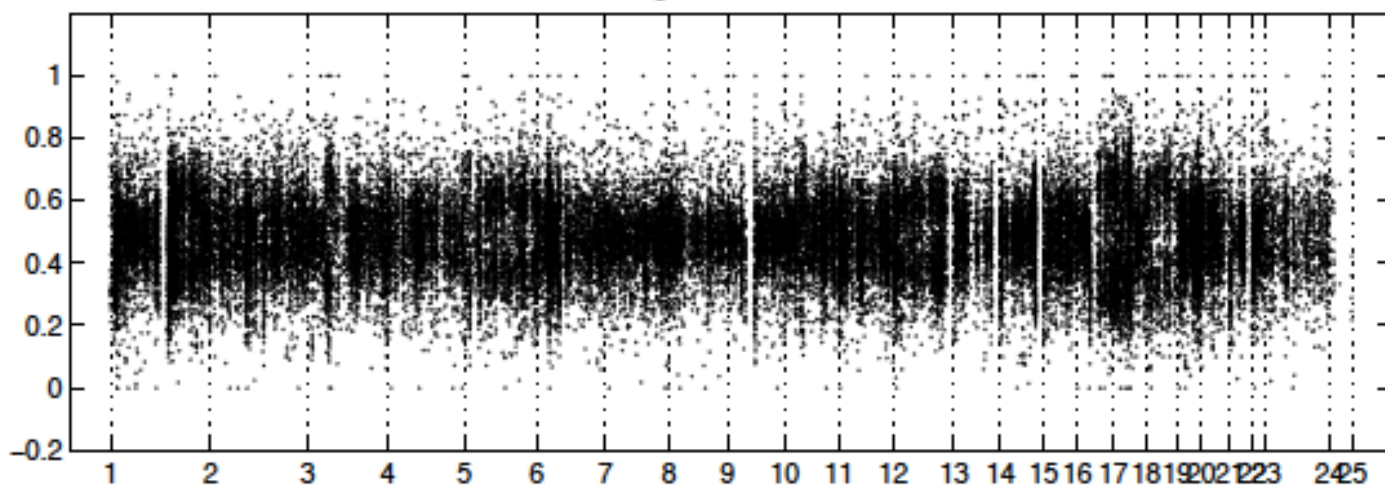

324\_ucsc.edu\_BRCA.IlluminaGA\_DNASeq.Level\_2.5.0.0\_TCGA-AN-A0AM\_W  
germline-het

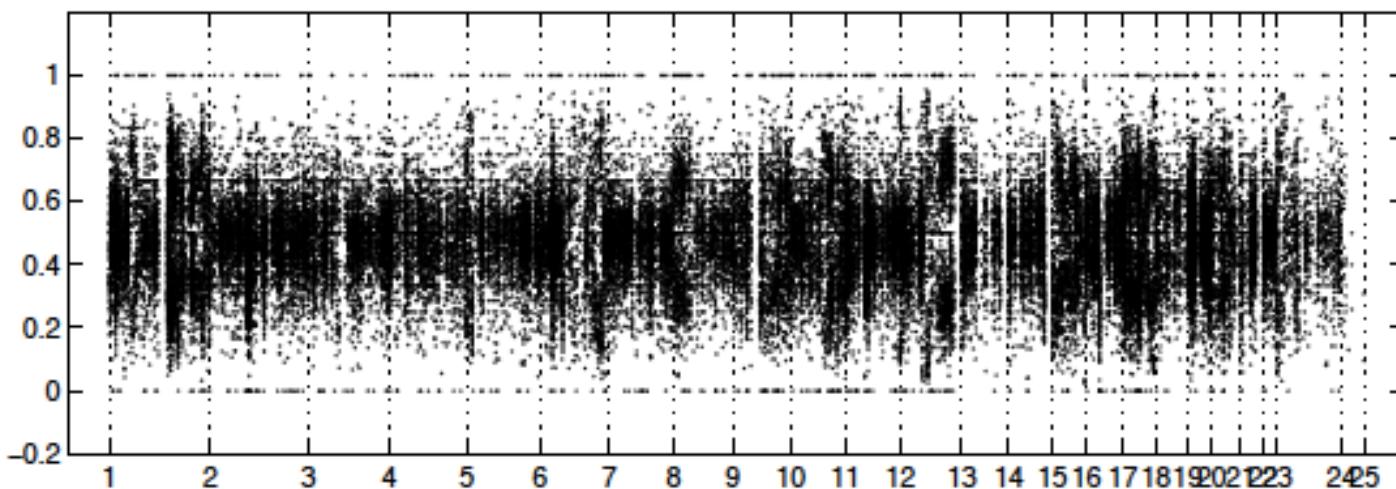

325\_ucsc.edu\_BRCA.IlluminaGA\_DNASeq.Level\_2.6.0.0\_TCGA-AO-A12E\_D  
germline-het

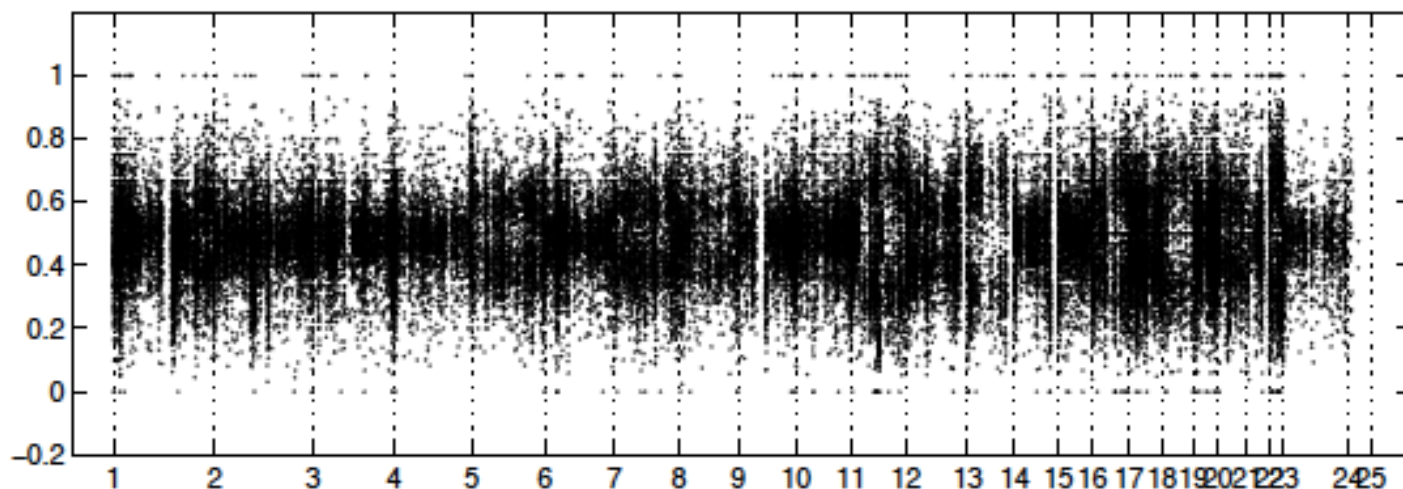

326\_ucsc.edu\_BRCA.IlluminaGA\_DNASeq.Level\_2.6.0.0\_TCGA-AO-A03R\_W  
germline-het

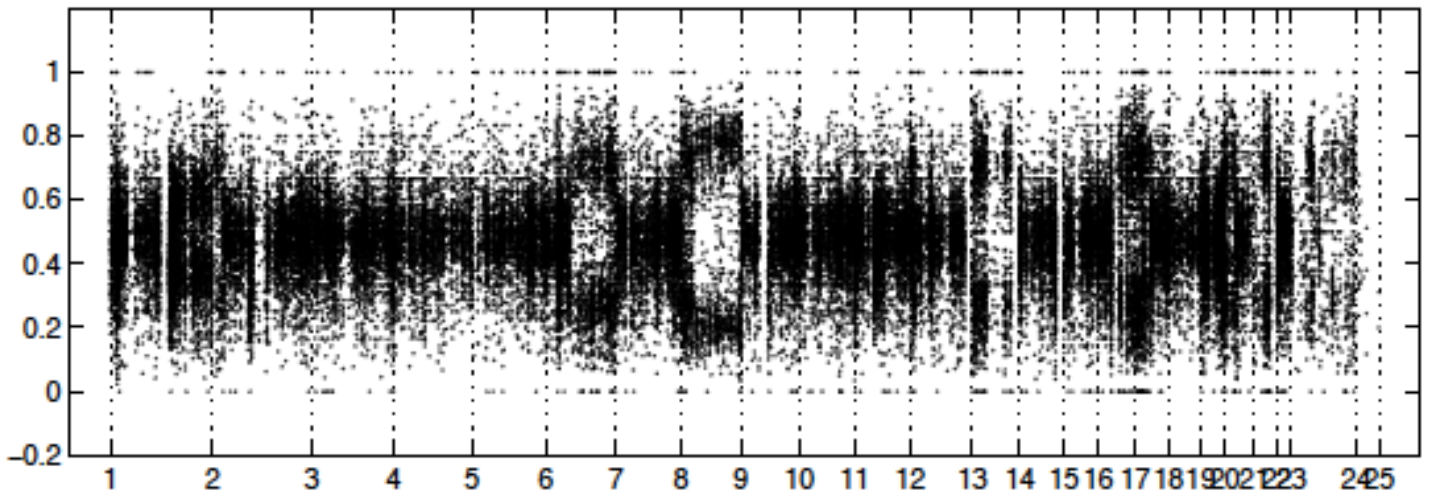

327\_ucsc.edu\_BRCA.IlluminaGA\_DNASeq.Level\_2.8.0.0\_TCGA-AR-A0TX\_D  
germline-het

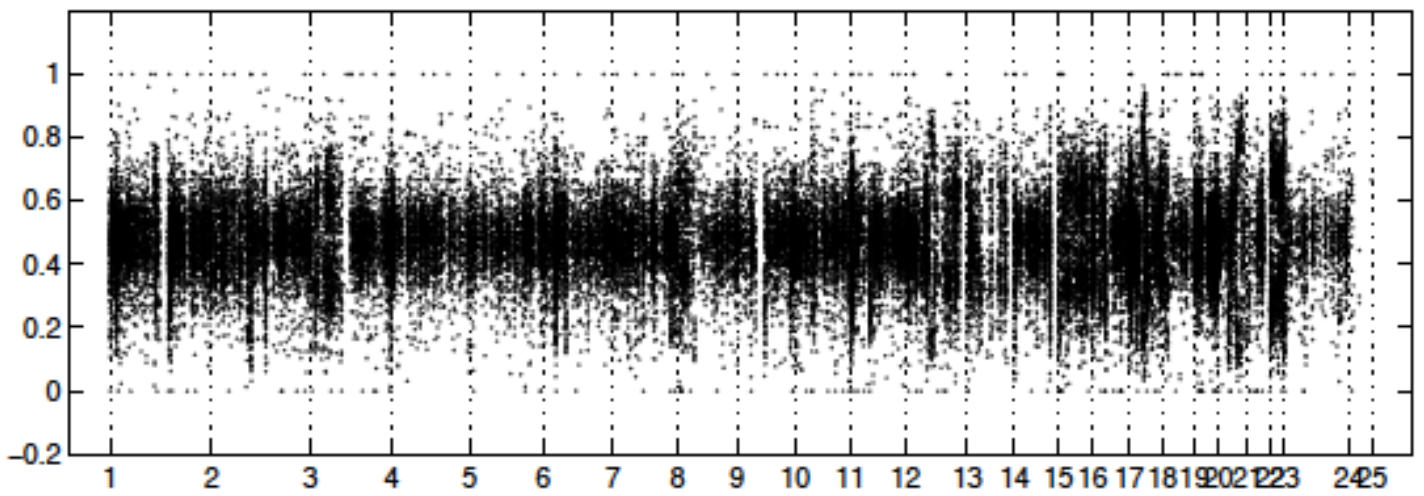

328\_ucsc.edu\_BRCA.IlluminaGA\_DNASeq.Level\_2.13.0.0\_TCGA-E2-A15H\_D  
germline-het

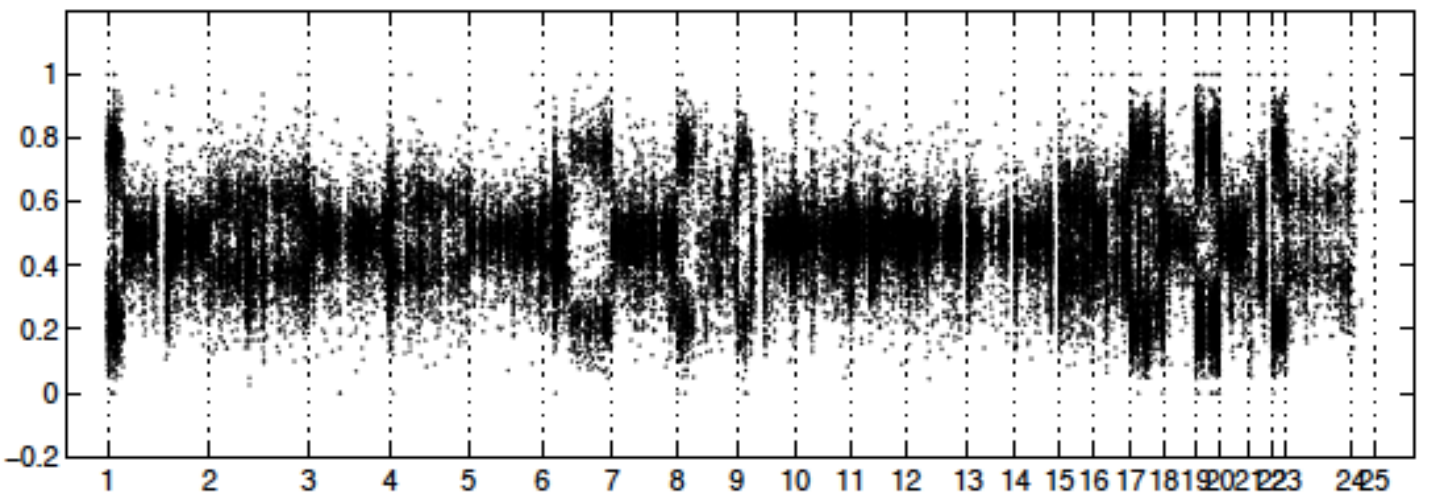

329\_ucsc.edu\_BRCA.IlluminaGA\_DNASeq.Level\_2.9.0.0\_TCGA-B6-A0WZ\_D  
germline-het

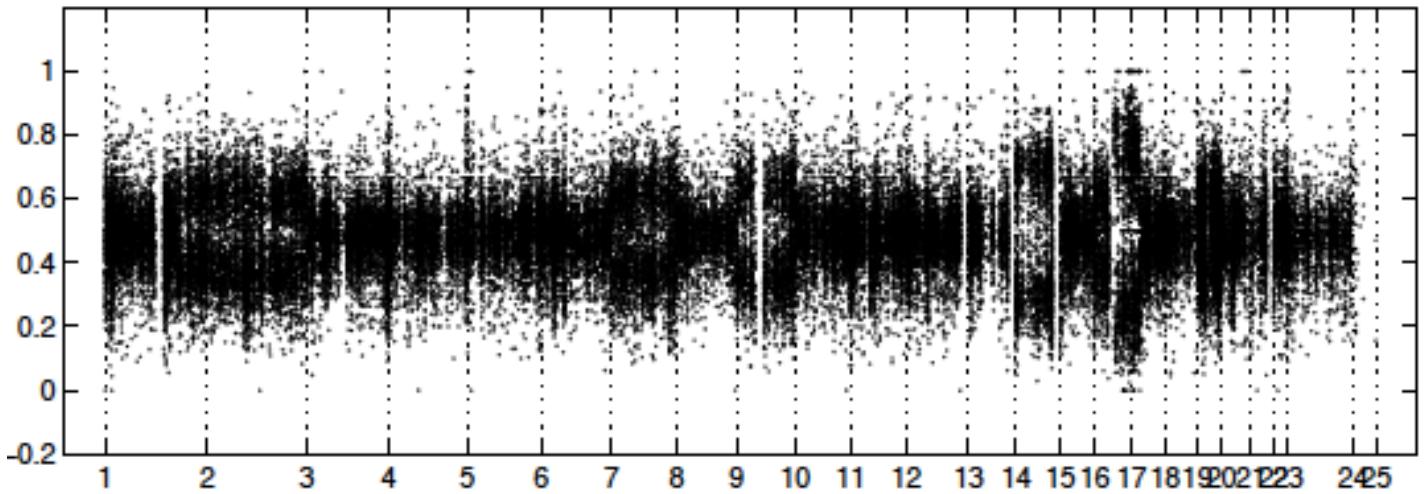

330\_ucsc.edu\_BRCA.IlluminaGA\_DNASeq.Level\_2.10.0.0\_TCGA-BH-A1EW\_D  
germline-het

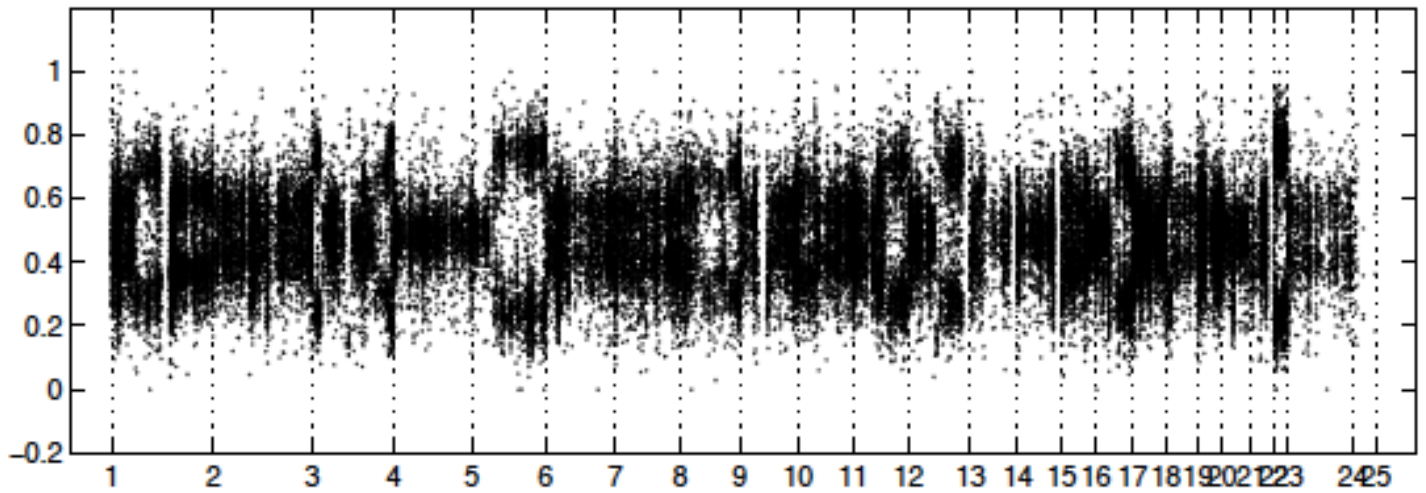

331\_ucsc.edu\_BRCA.IlluminaGA\_DNASeq.Level\_2.10.0.0\_TCGA-BH-A0AZ\_D  
germline-het

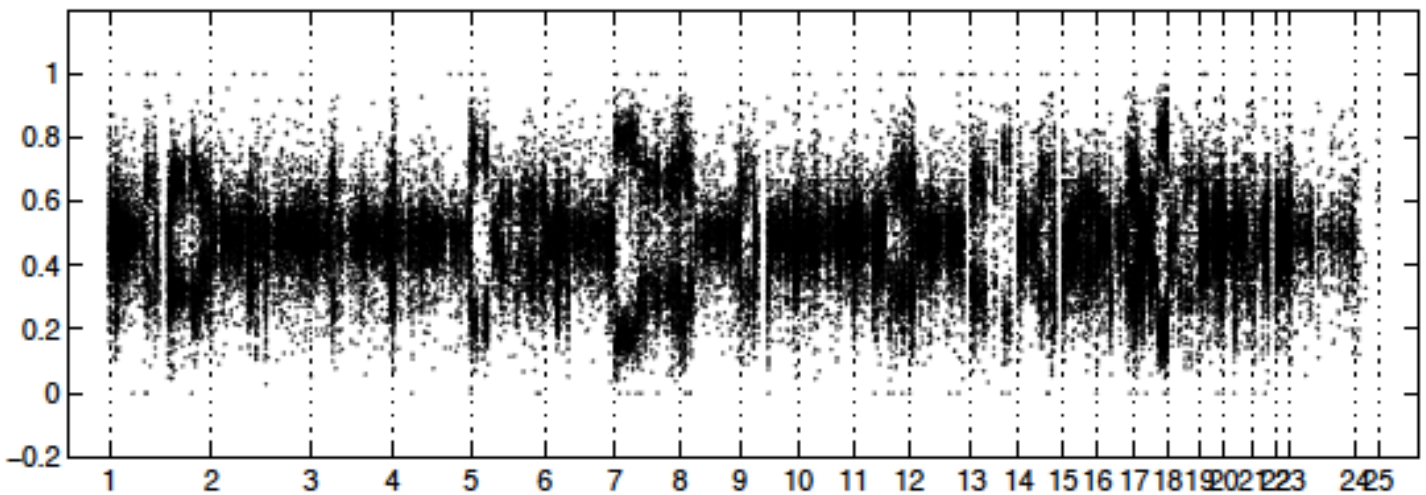



332\_ucsc.edu\_BRCA.IlluminaGA\_DNASeq.Level\_2.13.0.0\_TCGA-E2-A14X\_D  
germline-het

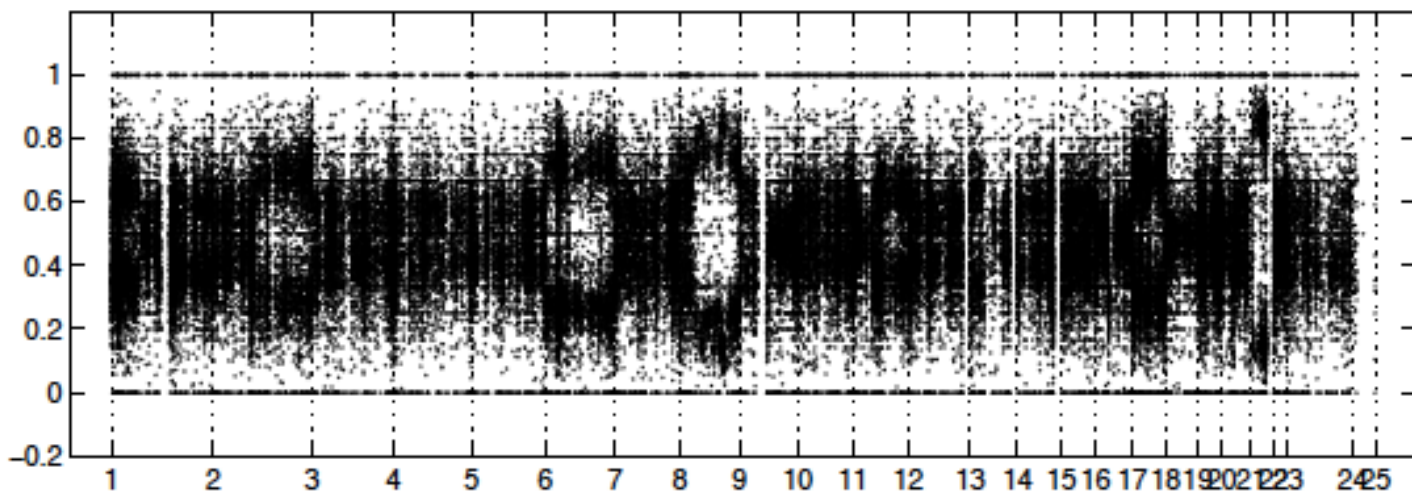

333\_ucsc.edu\_BRCA.IlluminaGA\_DNASeq.Level\_2.4.0.0\_TCGA-A8-A06P\_W  
germline-het

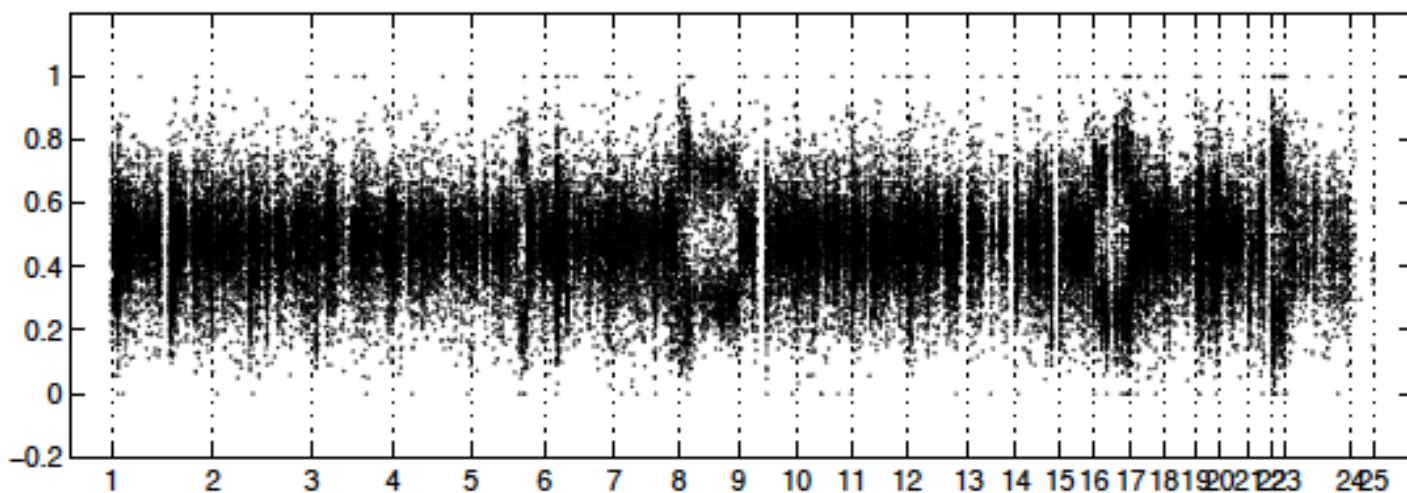

334\_ucsc.edu\_BRCA.IlluminaGA\_DNASeq.Level\_2.4.0.0\_TCGA-A8-A096\_W  
germline-het

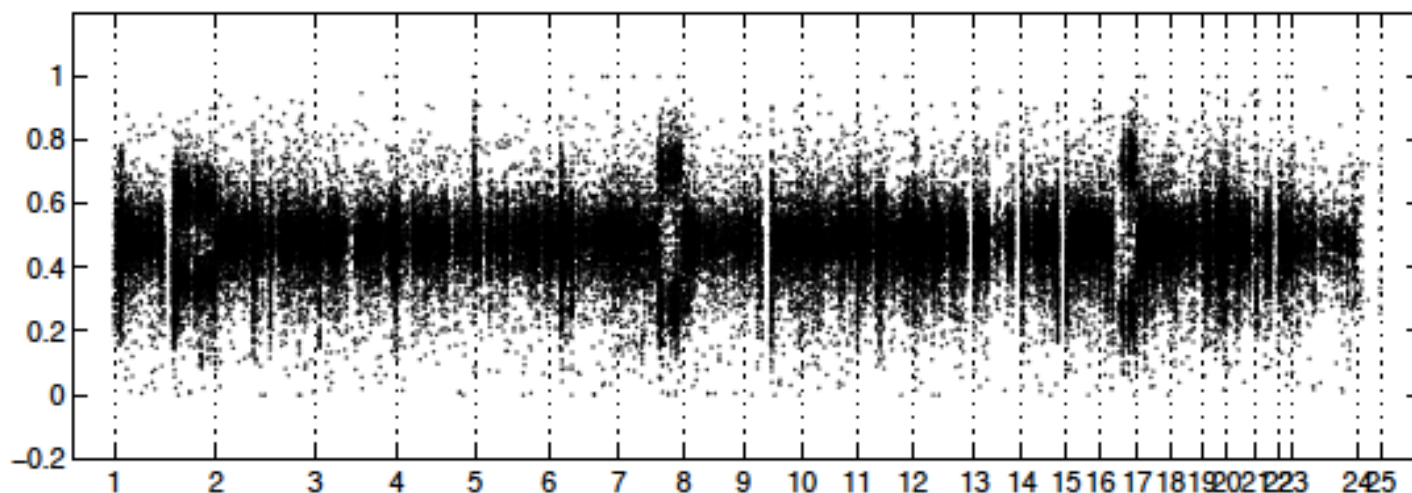

335\_ucsc.edu\_BRCA.IlluminaGA\_DNASeq.Level\_2.4.0.0\_TCGA-A8-A08A\_W  
germline-het

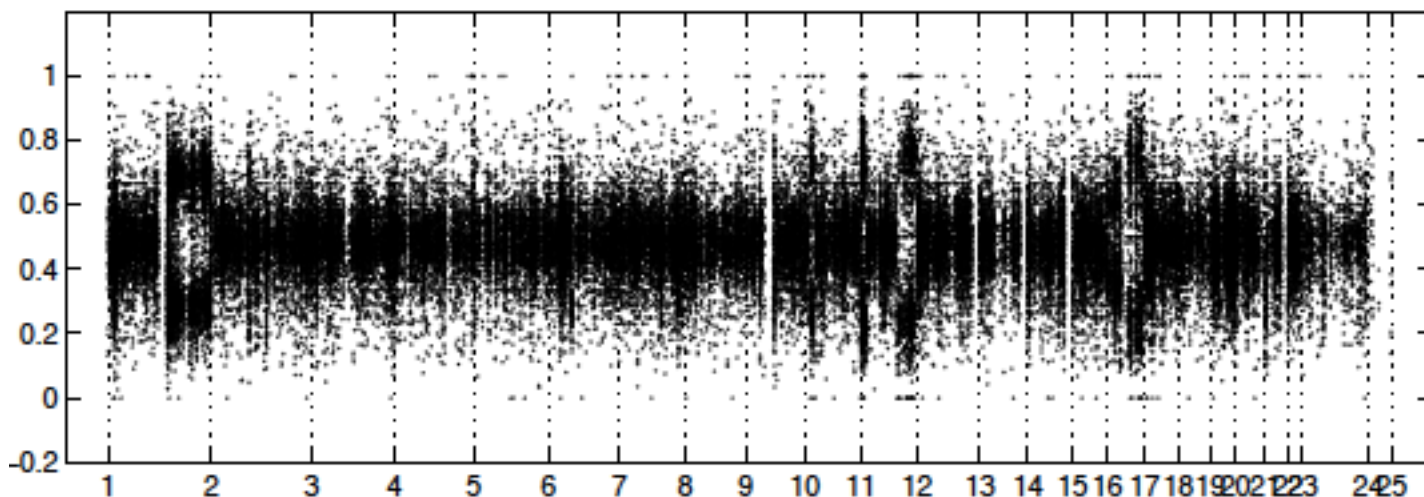

336\_ucsc.edu\_BRCA.IlluminaGA\_DNASeq.Level\_2.10.0.0\_TCGA-BH-A0BJ\_W  
germline-het

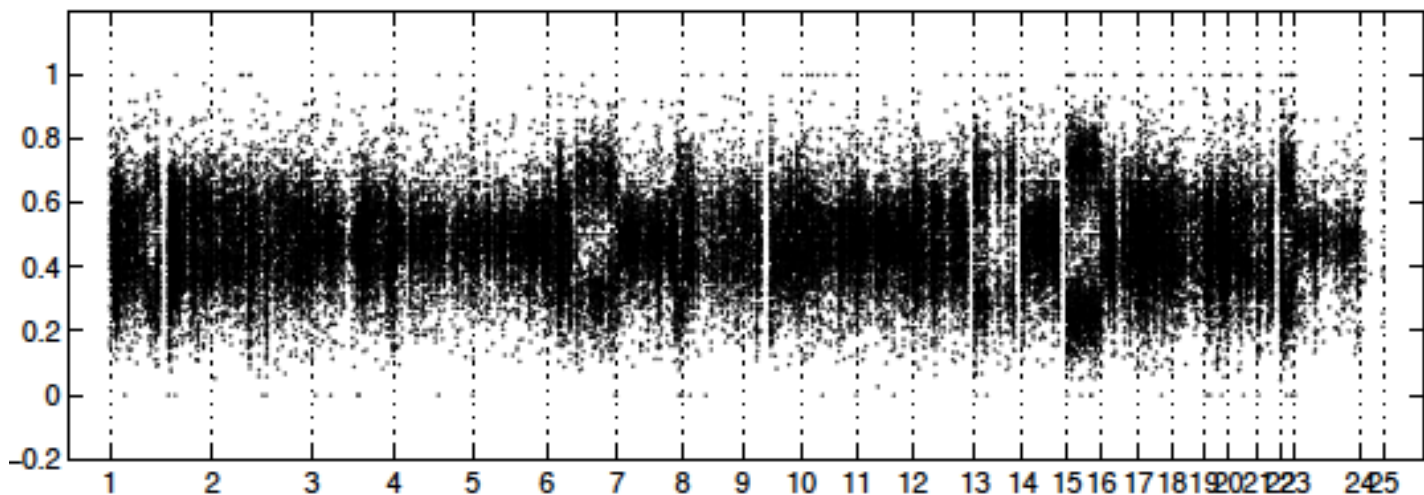

337\_ucsc.edu\_BRCA.IlluminaGA\_DNASeq.Level\_2.4.0.0\_TCGA-A8-A07E\_W  
germline-het

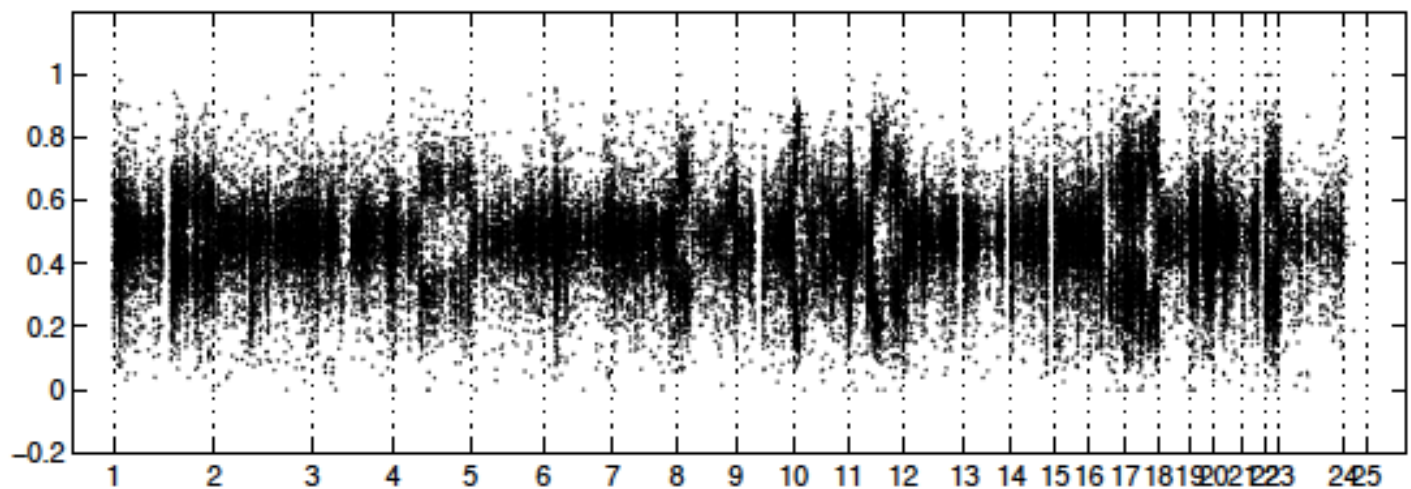

338\_ucsc.edu\_BRCA.IlluminaGA\_DNASeq.Level\_2.10.0.0\_TCGA-BH-A0GZ\_W  
germline-het

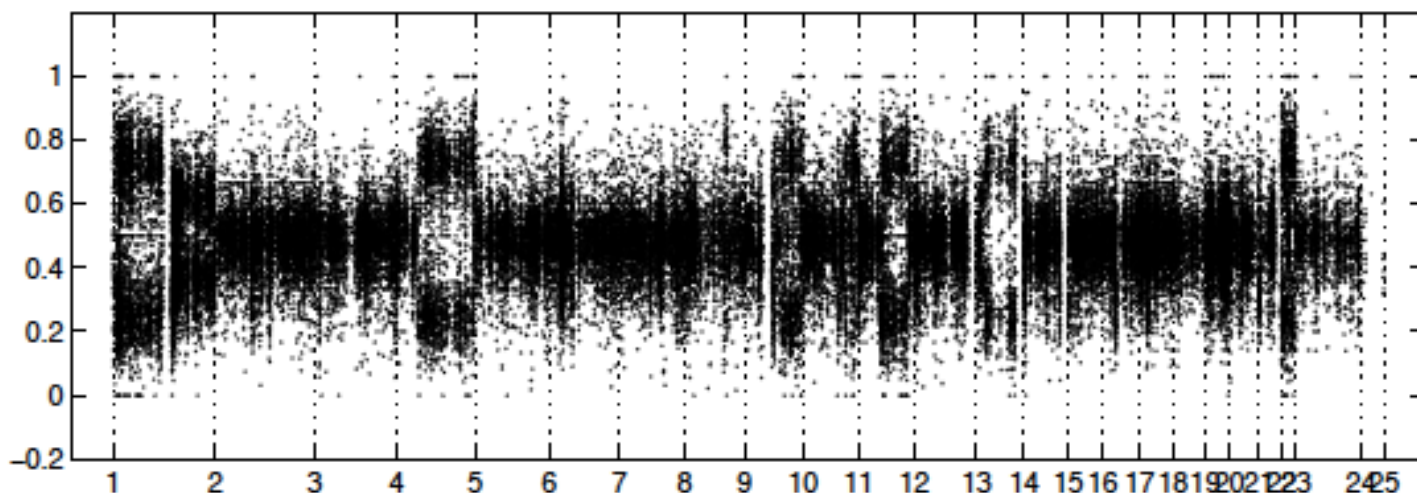

339\_ucsc.edu\_BRCA.IlluminaGA\_DNASeq.Level\_2.9.0.0\_TCGA-B6-A0X4\_D  
germline-het

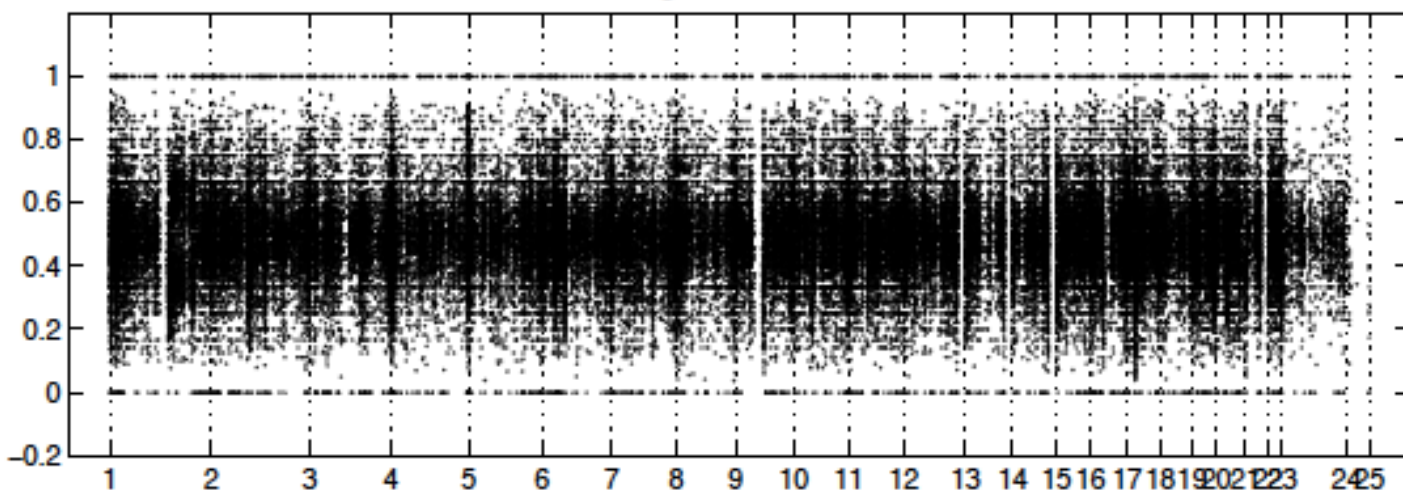

340\_ucsc.edu\_BRCA.IlluminaGA\_DNASeq.Level\_2.13.0.0\_TCGA-E2-A14Y\_D  
germline-het

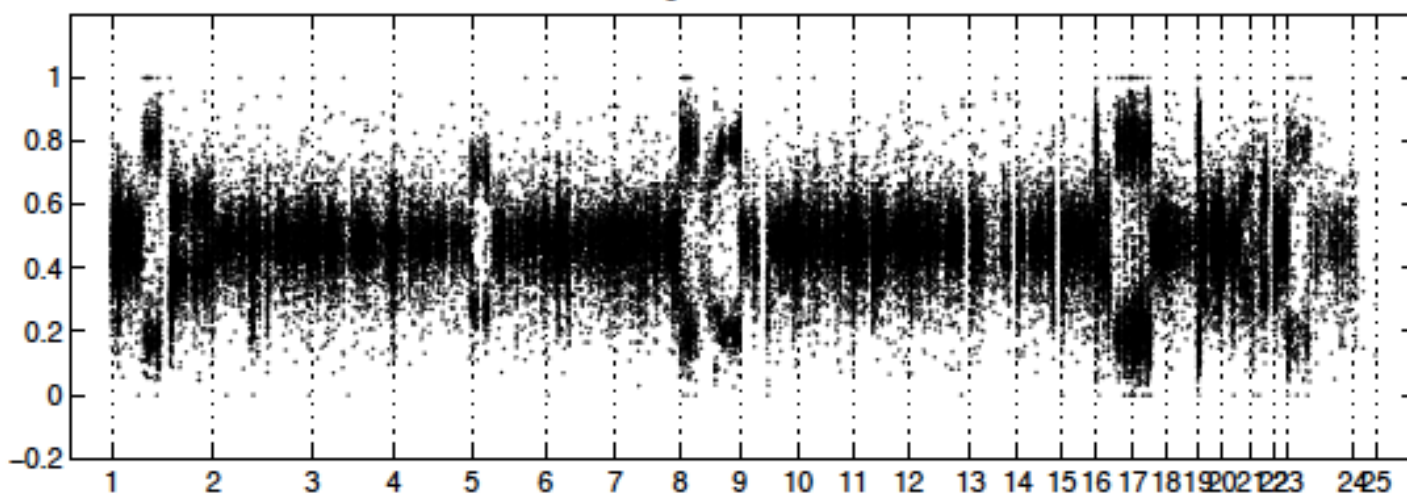

341\_ucsc.edu\_BRCA.IlluminaGA\_DNASeq.Level\_2.13.0.0\_TCGA-E2-A154\_D  
germline-het

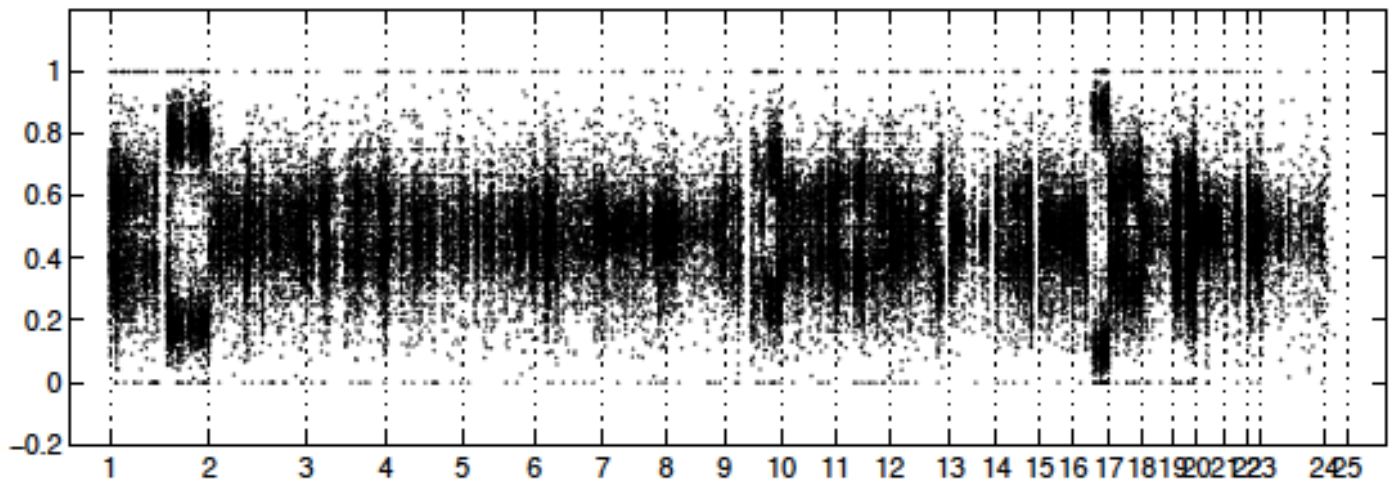

342\_ucsc.edu\_BRCA.IlluminaGA\_DNASeq.Level\_2.13.0.0\_TCGA-E2-A10A\_D  
germline-het

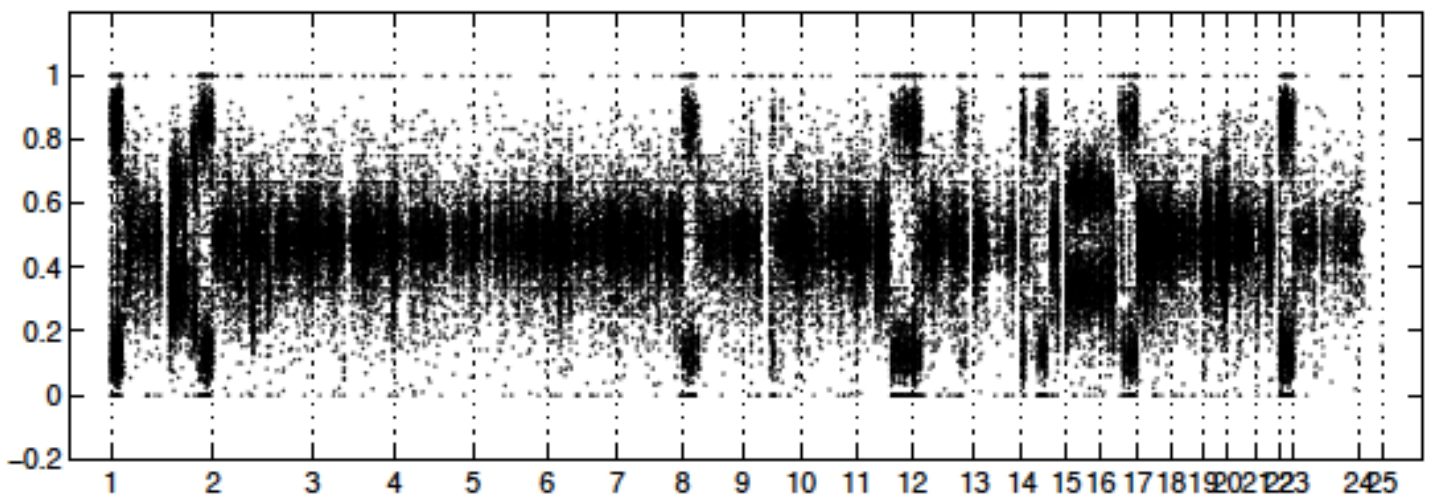

343\_ucsc.edu\_BRCA.IlluminaGA\_DNASeq.Level\_2.8.0.0\_TCGA-AR-A1AN\_D  
germline-het

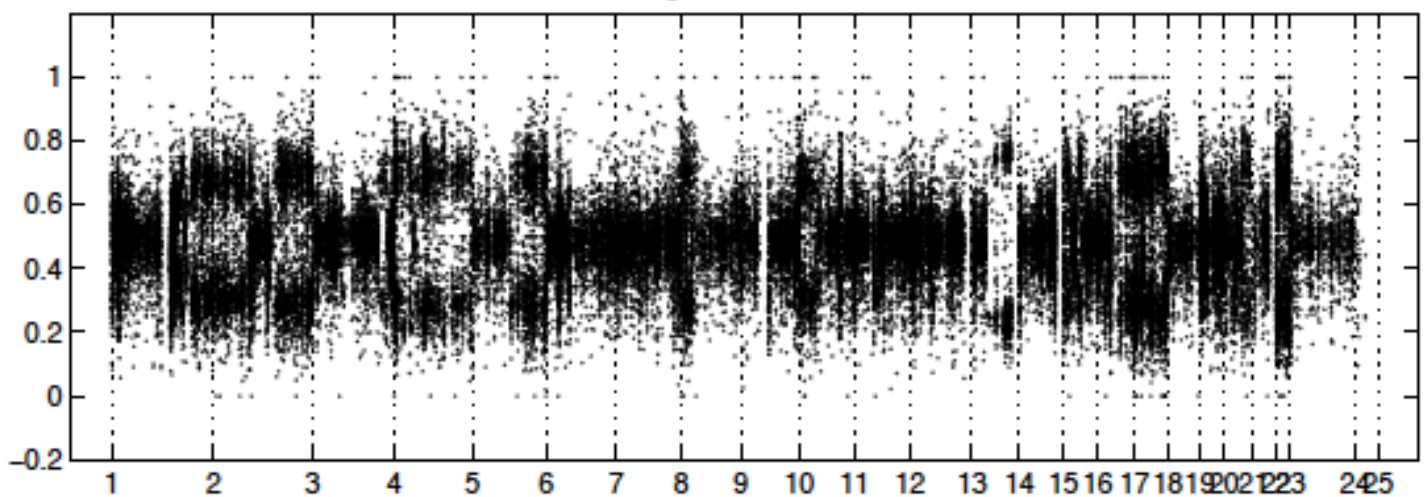

344\_ucsc.edu\_BRCA.IlluminaGA\_DNASeq.Level\_2.10.0.0\_TCGA-BH-A18P\_D  
germline-het

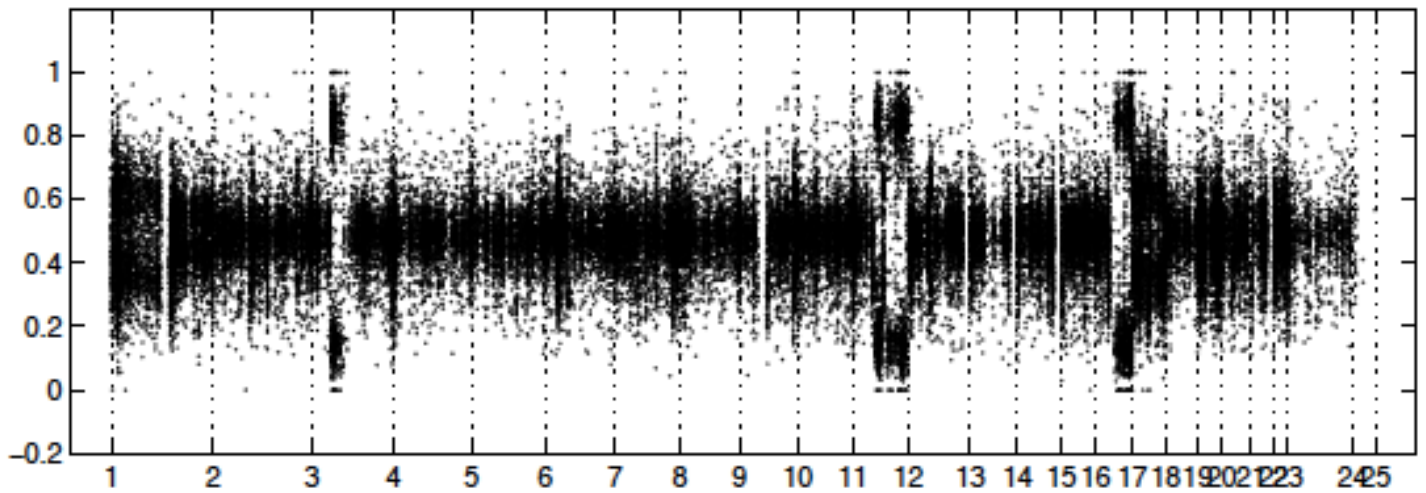

345\_ucsc.edu\_BRCA.IlluminaGA\_DNASeq.Level\_2.10.0.0\_TCGA-BH-A0DP\_W  
germline-het

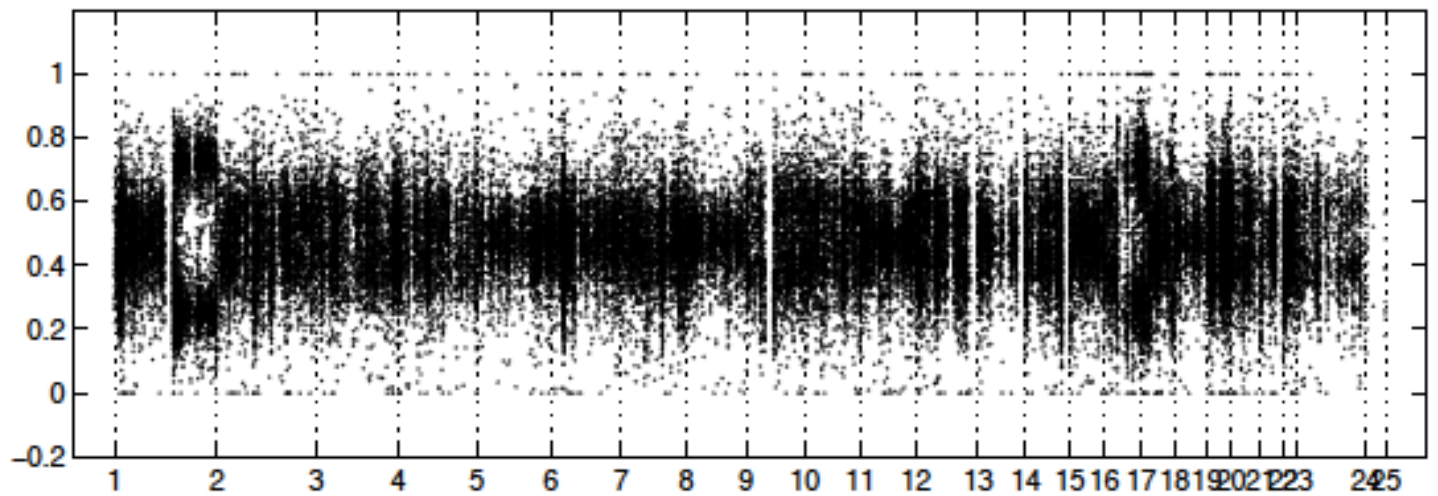

346\_ucsc.edu\_BRCA.IlluminaGA\_DNASeq.Level\_2.2.0.0\_TCGA-A2-A0CV\_D  
germline-het

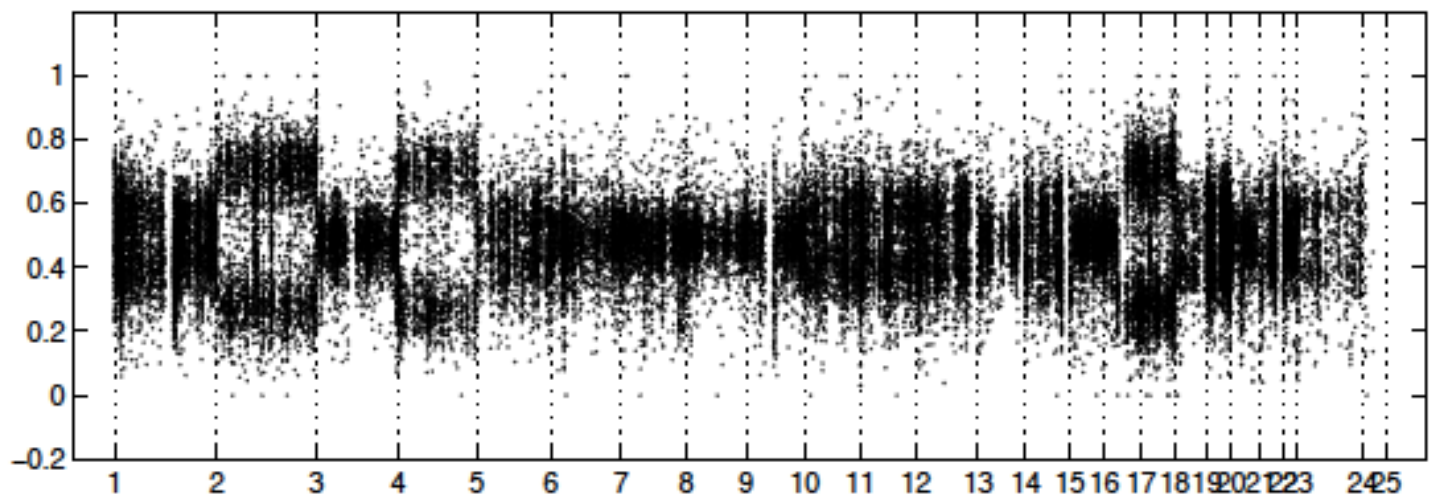

347\_ucsc.edu\_BRCA.IlluminaGA\_DNASeq.Level\_2.10.0.0\_TCGA-BH-A0H6\_W  
germline-het

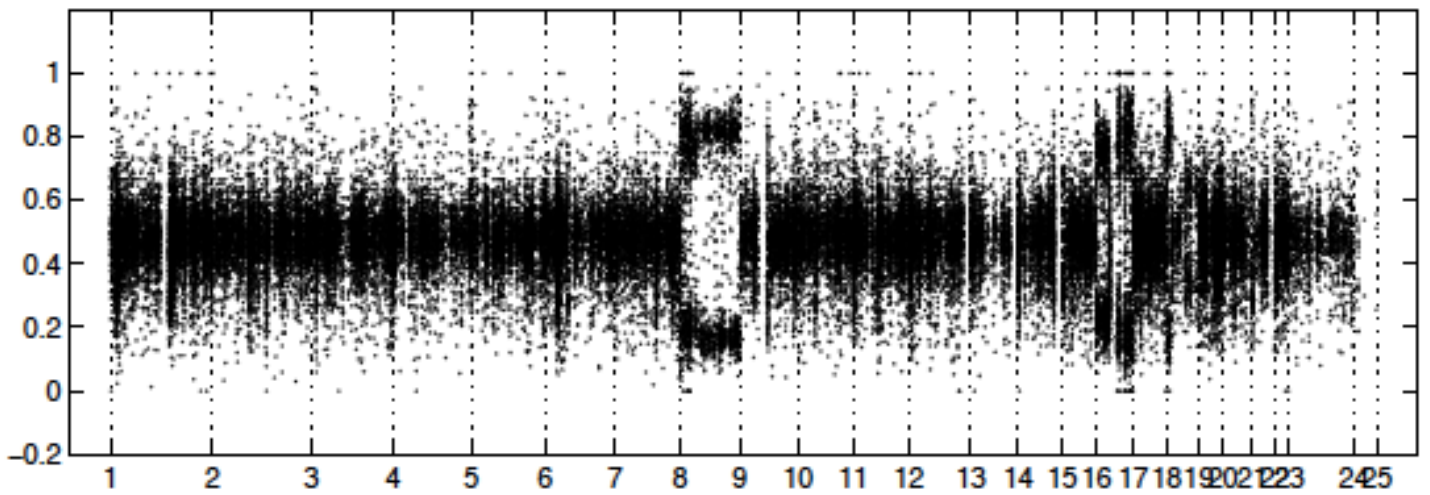

348\_ucsc.edu\_BRCA.IlluminaGA\_DNASeq.Level\_2.10.0.0\_TCGA-BH-A18I\_D  
germline-het

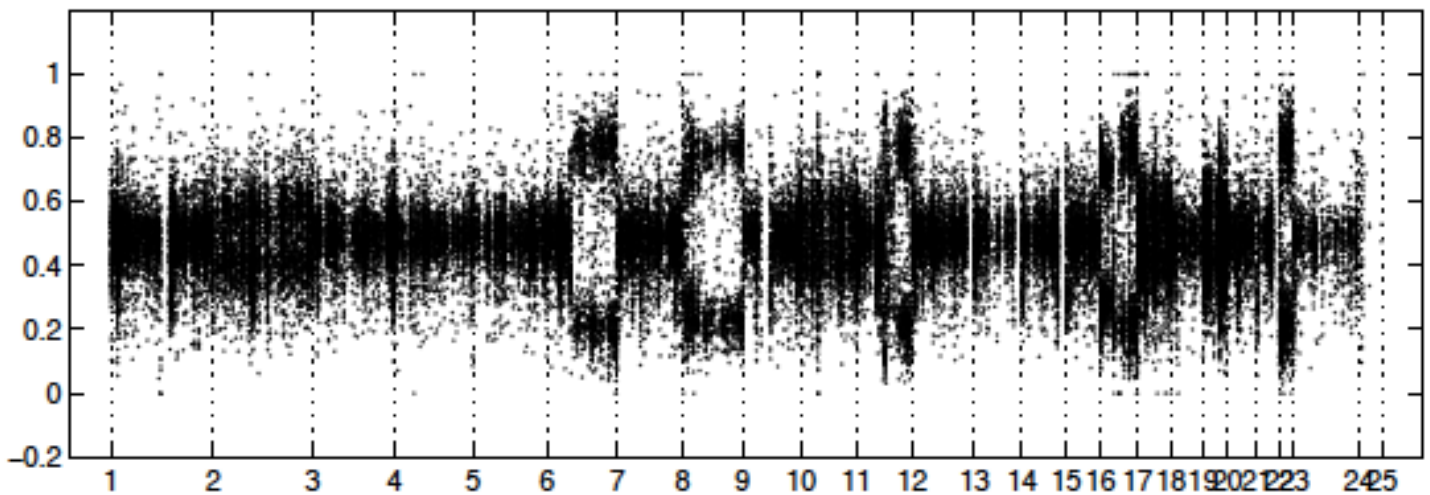

349\_ucsc.edu\_BRCA.IlluminaGA\_DNASeq.Level\_2.13.0.0\_TCGA-E2-A15E\_D  
germline-het

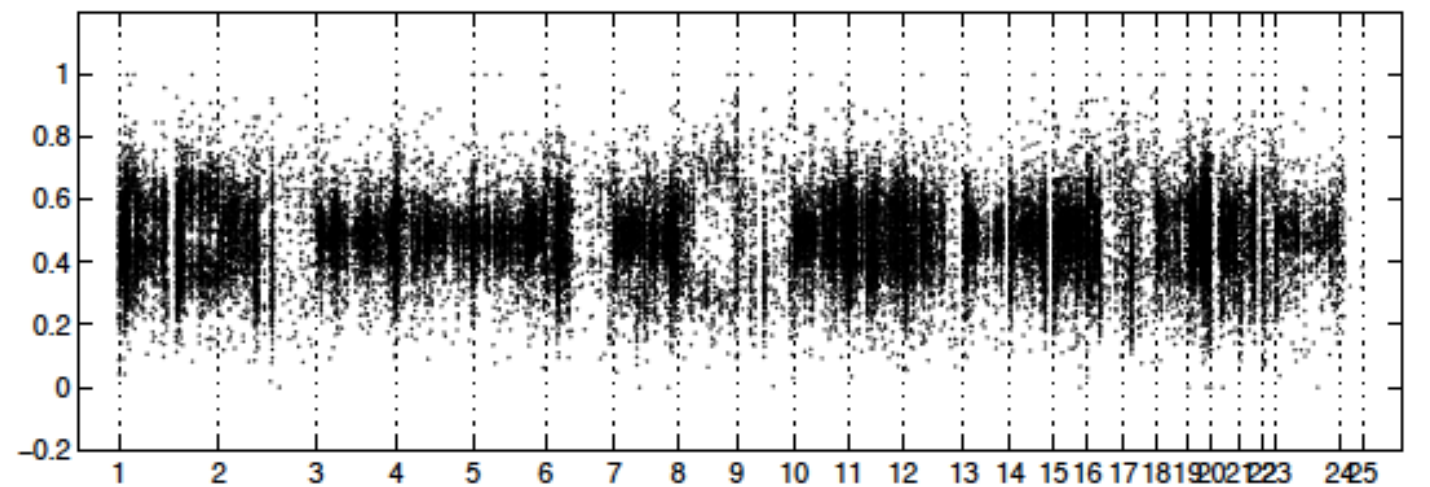

350\_ucsc.edu\_BRCA.IlluminaGA\_DNASeq.Level\_2.10.0.0\_TCGA-BH-A0HF\_W  
germline-het

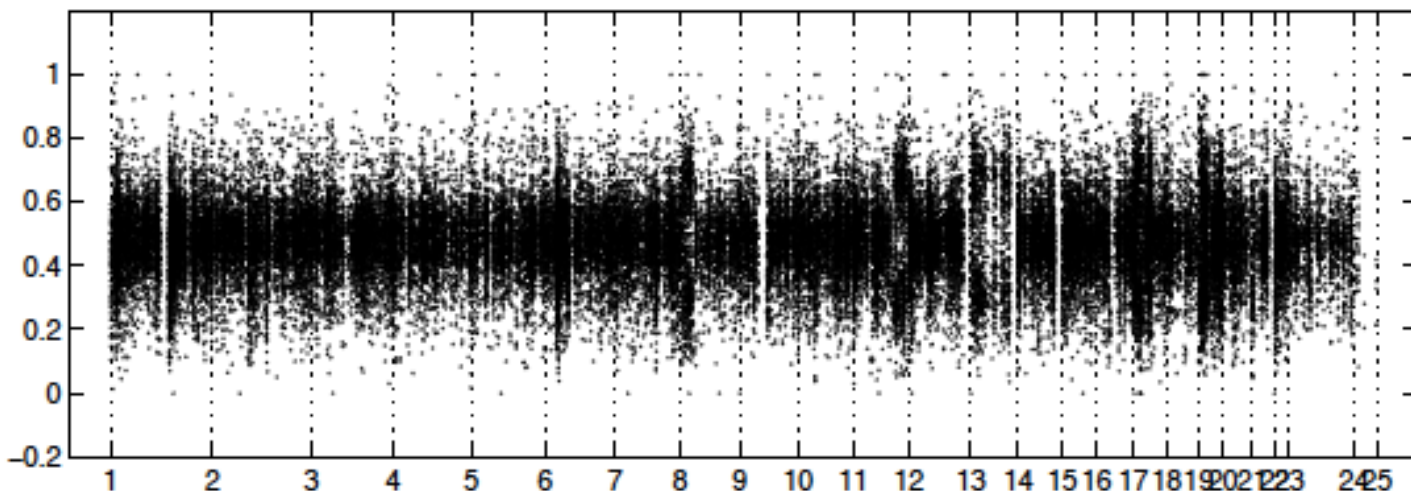

351\_ucsc.edu\_BRCA.IlluminaGA\_DNASeq.Level\_2.14.0.0\_TCGA-BH-A0B5\_W  
germline-het

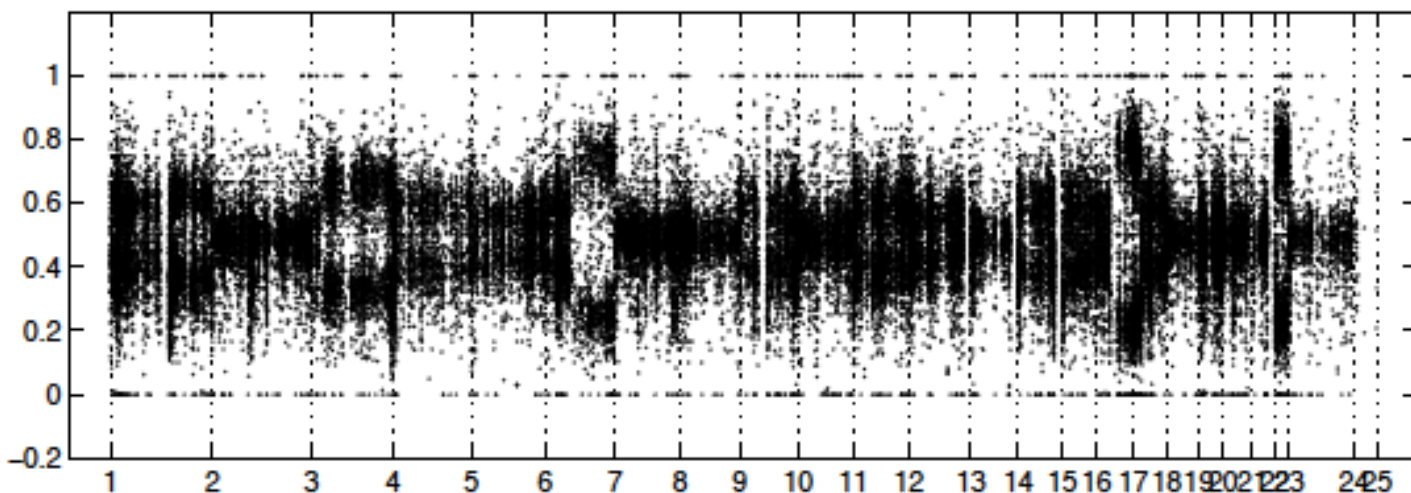

352\_ucsc.edu\_BRCA.IlluminaGA\_DNASeq.Level\_2.11.0.0\_TCGA-C8-A131\_D  
germline-het

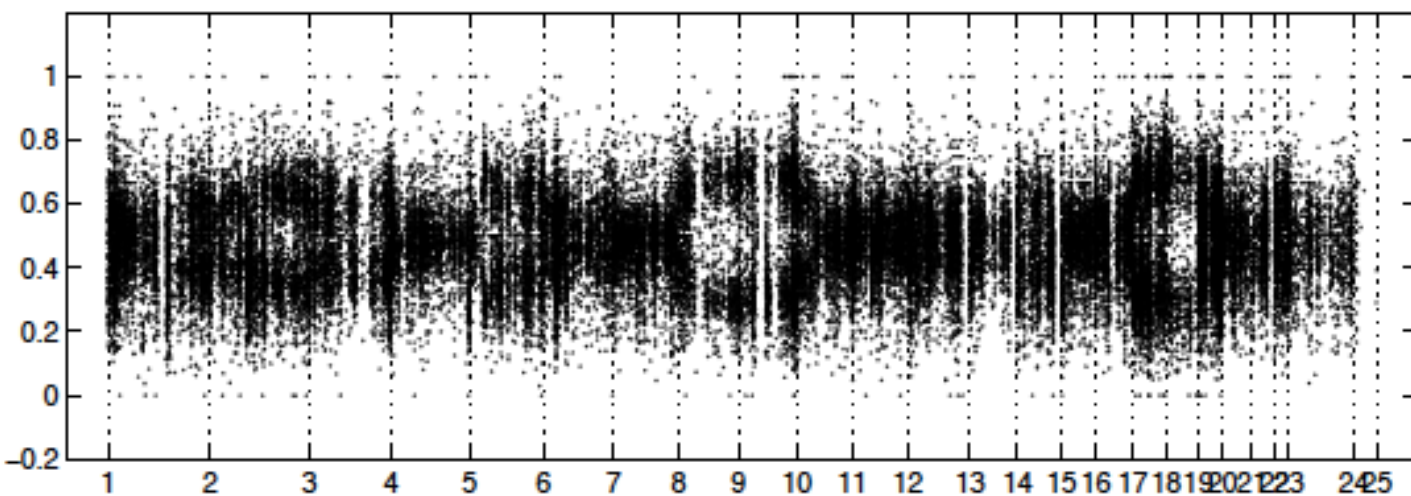

353\_ucsc.edu\_BRCA.IlluminaGA\_DNASeq.Level\_2.2.0.0\_TCGA-A2-A0EQ\_W  
germline-het

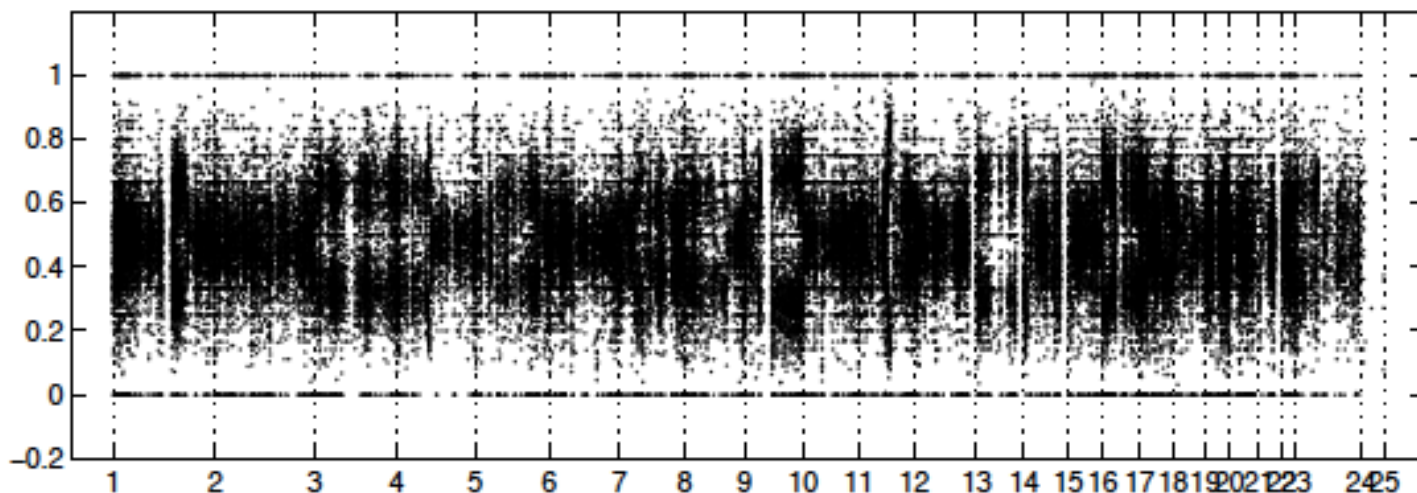

354\_ucsc.edu\_BRCA.IlluminaGA\_DNASeq.Level\_2.10.0.0\_TCGA-BH-A0C0\_W  
germline-het

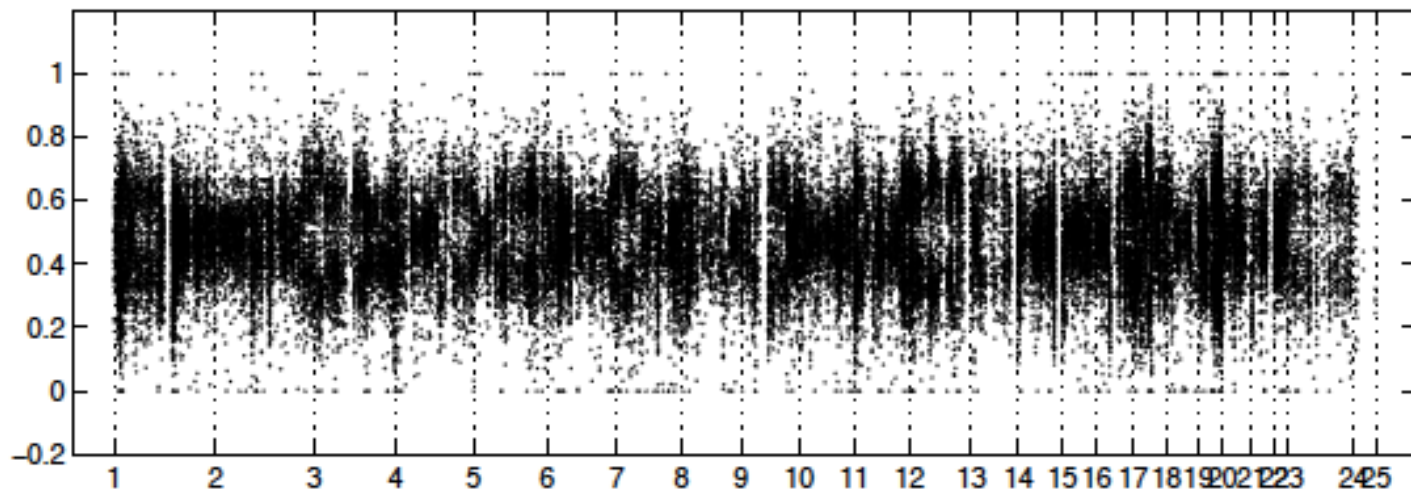

355\_ucsc.edu\_BRCA.IlluminaGA\_DNASeq.Level\_2.12.0.0\_TCGA-D8-A146\_D  
germline-het

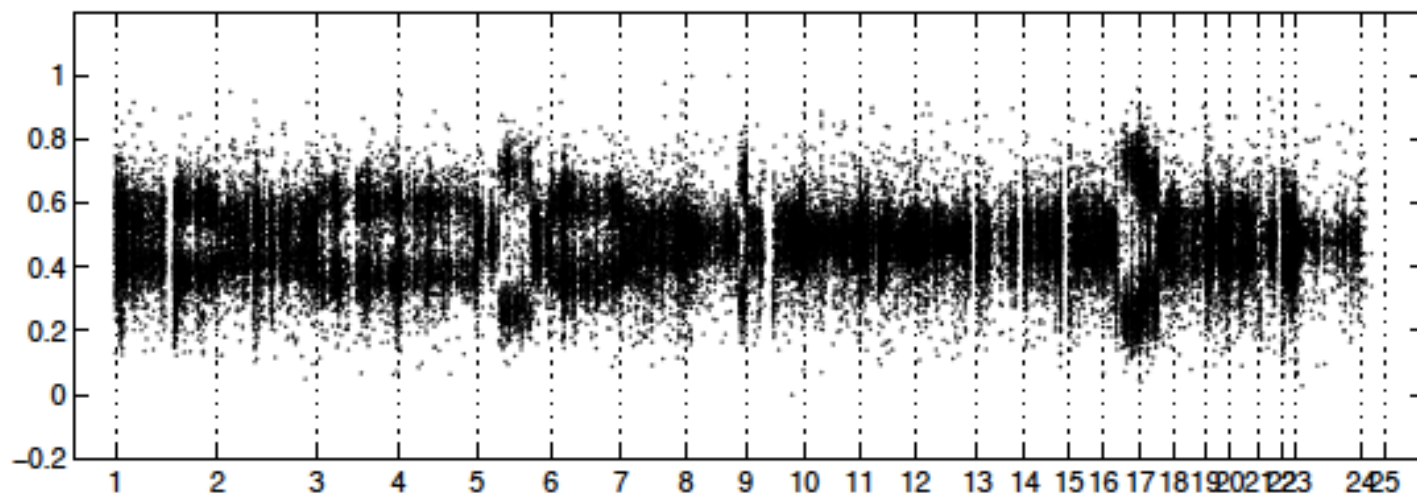



356\_ucsc.edu\_BRCA.IlluminaGA\_DNASeq.Level\_2.9.0.0\_TCGA-B6-A015\_W  
germline-het

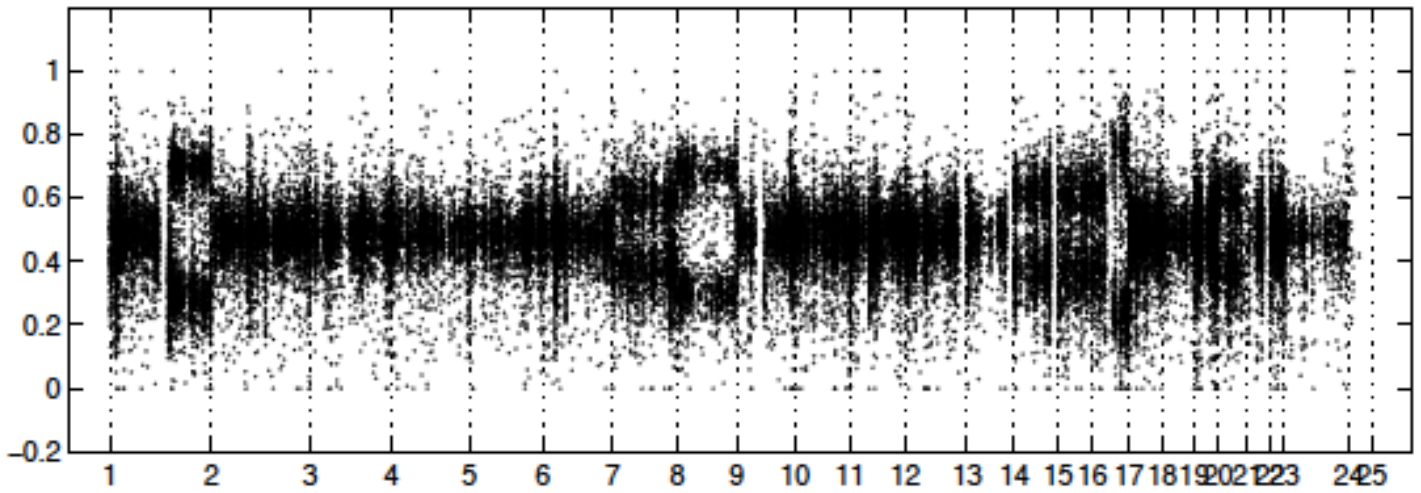

357\_ucsc.edu\_BRCA.IlluminaGA\_DNASeq.Level\_2.14.0.0\_TCGA-A8-A09V\_W  
germline-het

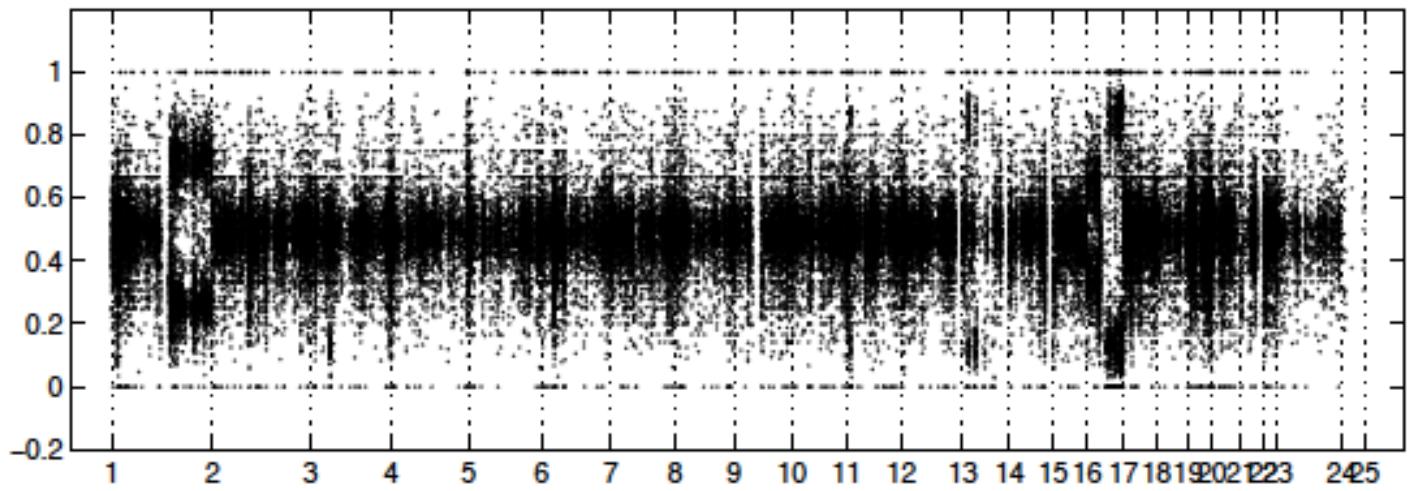

358\_ucsc.edu\_BRCA.IlluminaGA\_DNASeq.Level\_2.10.0.0\_TCGA-BH-A0BD\_W  
germline-het

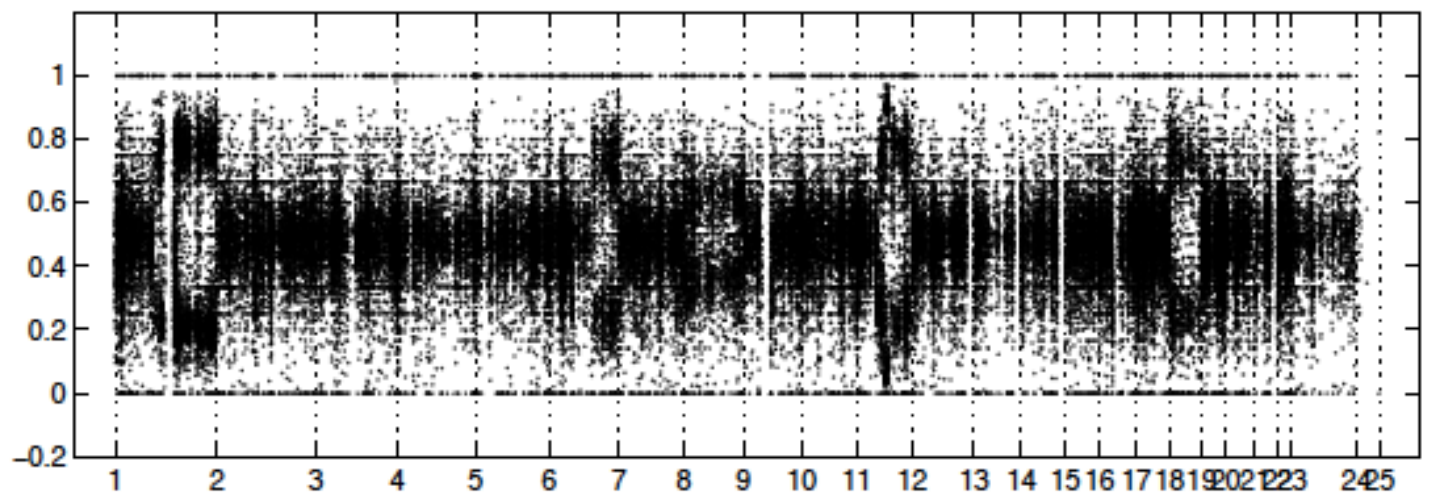

359\_ucsc.edu\_BRCA.IlluminaGA\_DNASeq.Level\_2.4.0.0\_TCGA-A8-A08X\_W  
germline-het

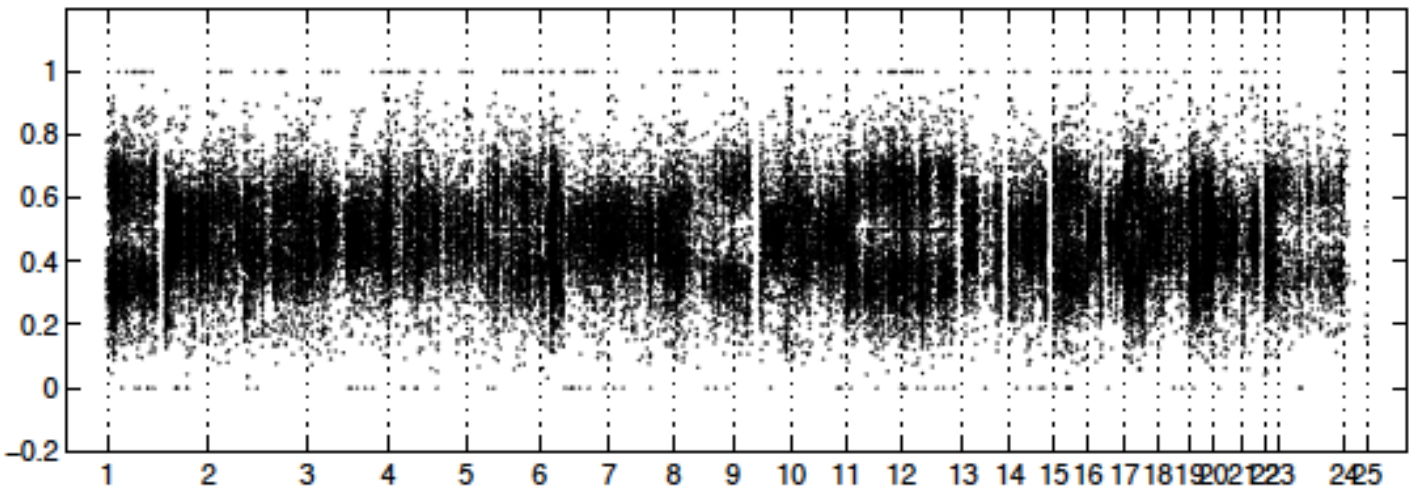

360\_ucsc.edu\_BRCA.IlluminaGA\_DNASeq.Level\_2.10.0.0\_TCGA-BH-A18R\_D  
germline-het

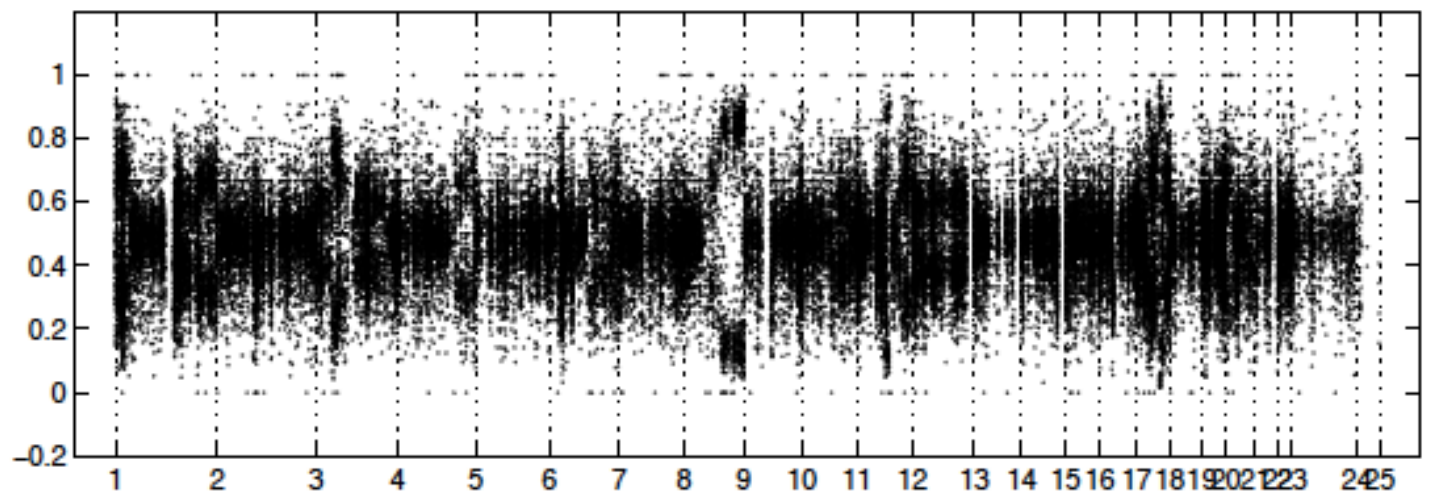

361\_ucsc.edu\_BRCA.IlluminaGA\_DNASeq.Level\_2.13.0.0\_TCGA-E2-A15O\_D  
germline-het

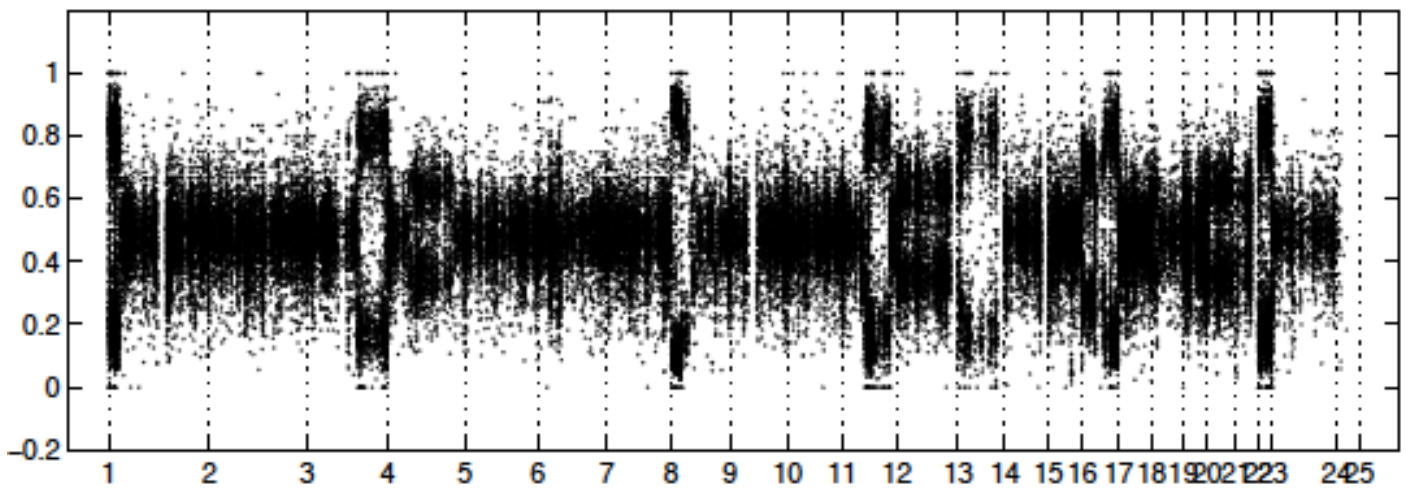

362\_ucsc.edu\_BRCA.IlluminaGA\_DNASeq.Level\_2.7.0.0\_TCGA-AQ-A04J\_W  
germline-het

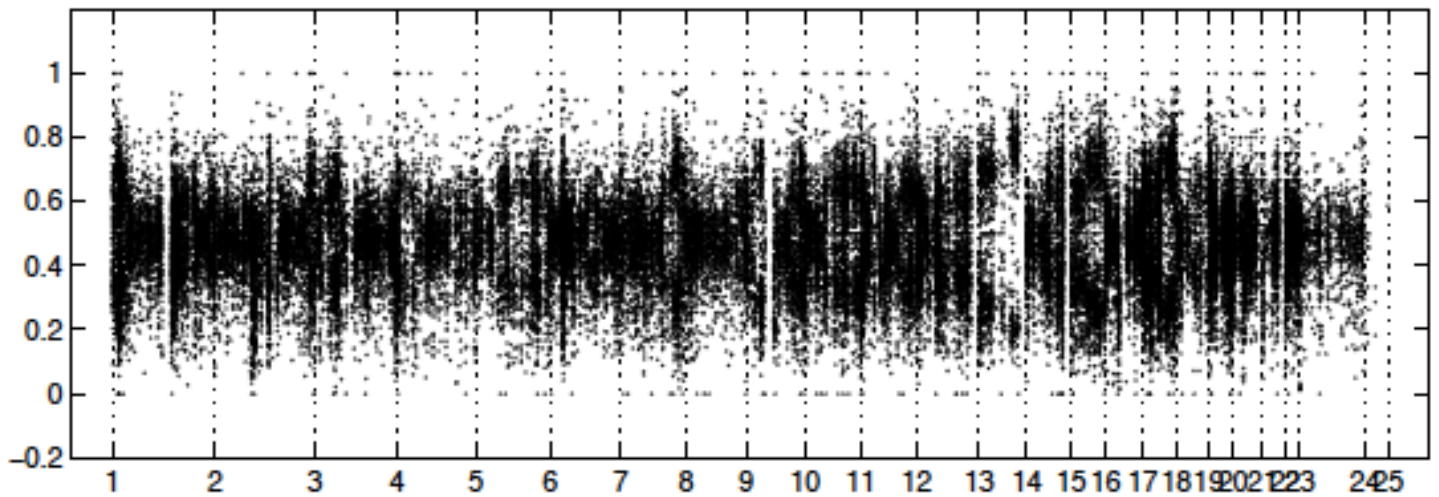

363\_ucsc.edu\_BRCA.IlluminaGA\_DNASeq.Level\_2.13.0.0\_TCGA-E2-A10E\_D  
germline-het

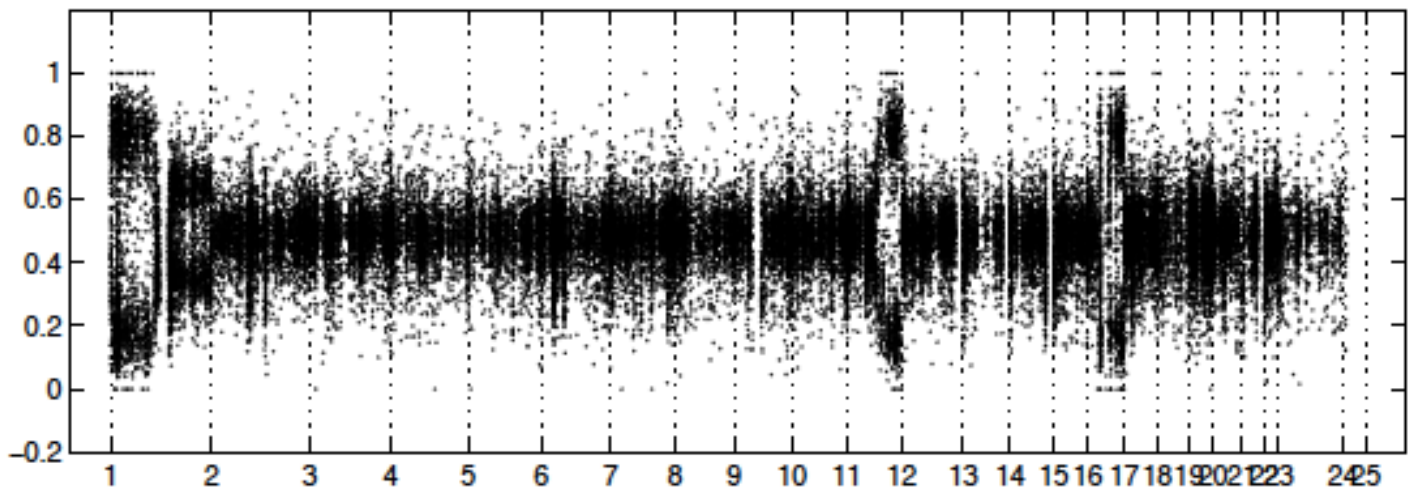

364\_ucsc.edu\_BRCA.IlluminaGA\_DNASeq.Level\_2.2.0.0\_TCGA-A2-A04W\_D  
germline-het

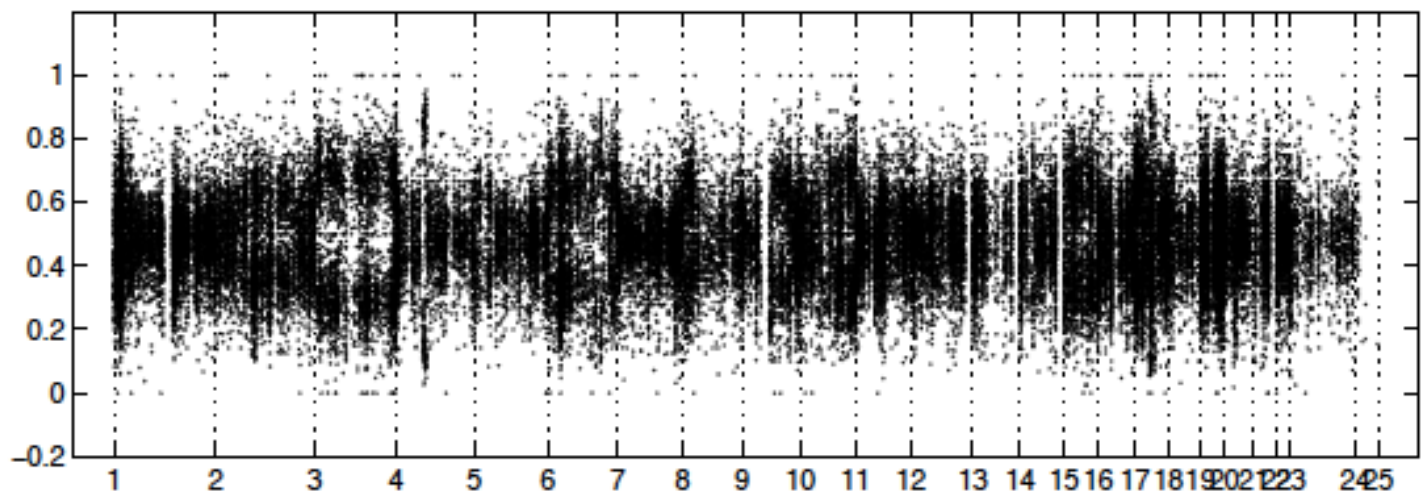

365\_ucsc.edu\_BRCA.IlluminaGA\_DNASeq.Level\_2.9.0.0\_TCGA-B6-A01E\_W  
germline-het

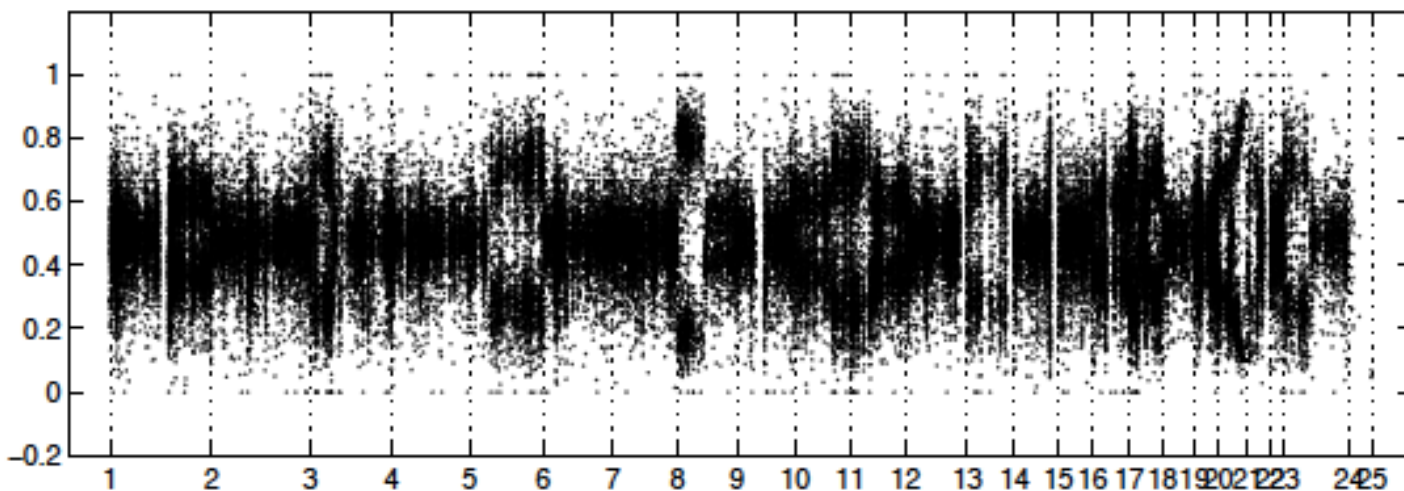

366\_ucsc.edu\_BRCA.IlluminaGA\_DNASeq.Level\_2.11.0.0\_TCGA-C8-A135\_D  
germline-het

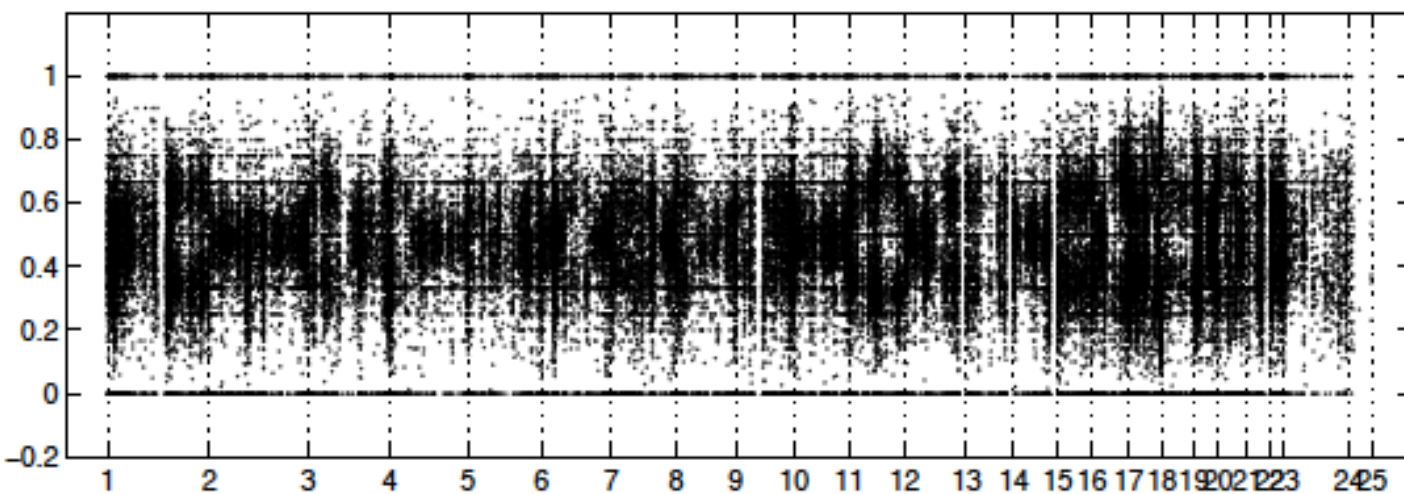

367\_ucsc.edu\_BRCA.IlluminaGA\_DNASeq.Level\_2.4.0.0\_TCGA-A8-A0A7\_W  
germline-het

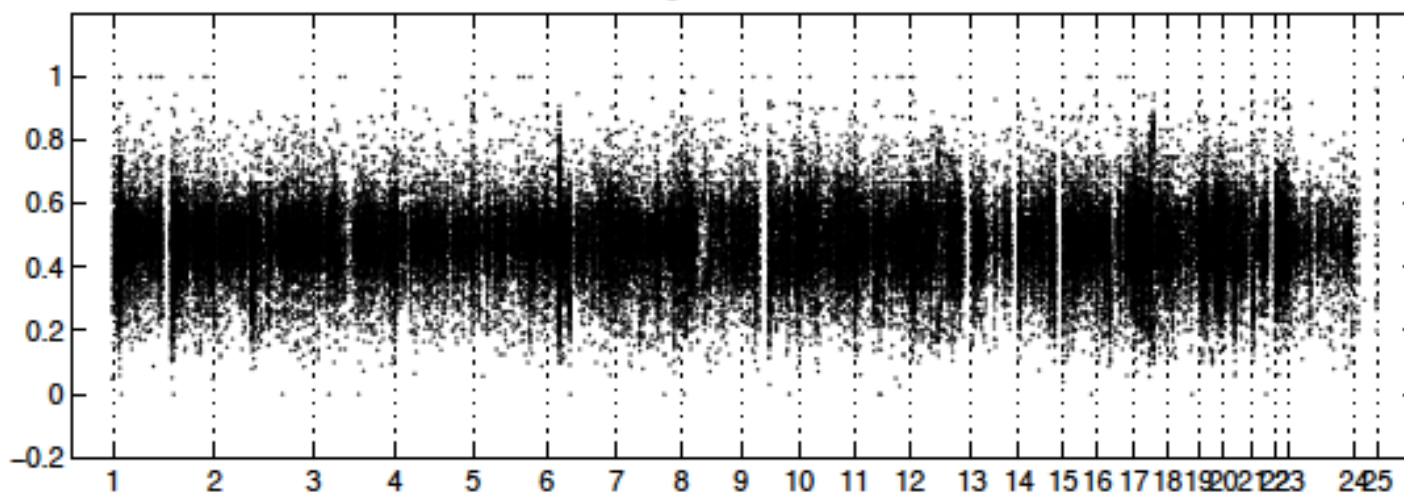

368\_ucsc.edu\_BRCA.IlluminaGA\_DNASeq.Level\_2.5.0.0\_TCGA-AN-A0FS\_W  
germline-het

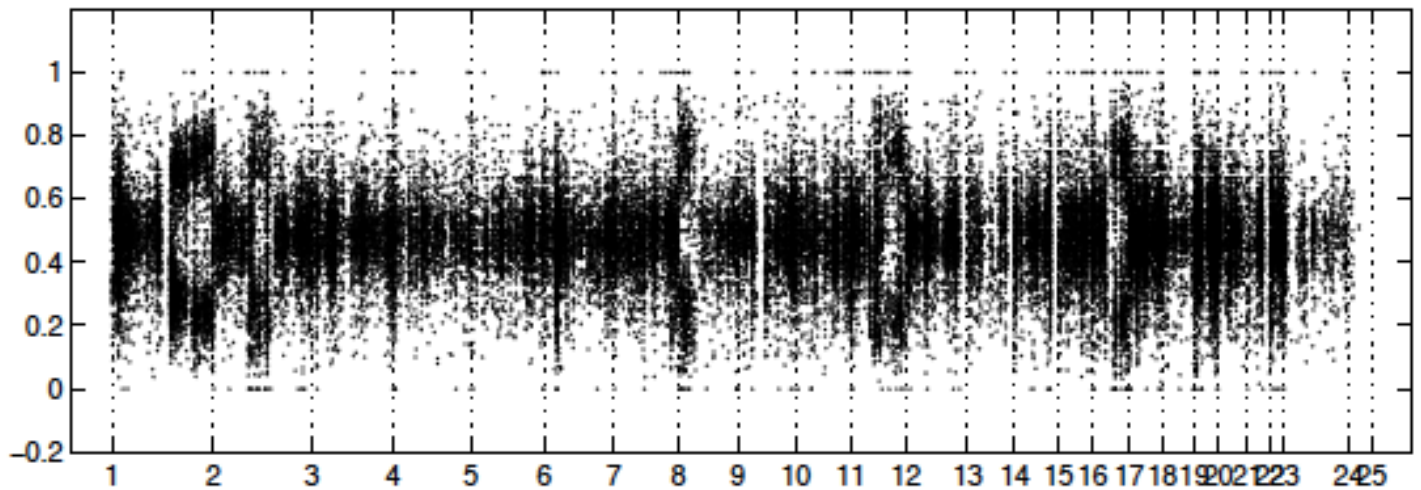

369\_ucsc.edu\_BRCA.IlluminaGA\_DNASeq.Level\_2.6.0.0\_TCGA-AO-A03U\_D  
germline-het

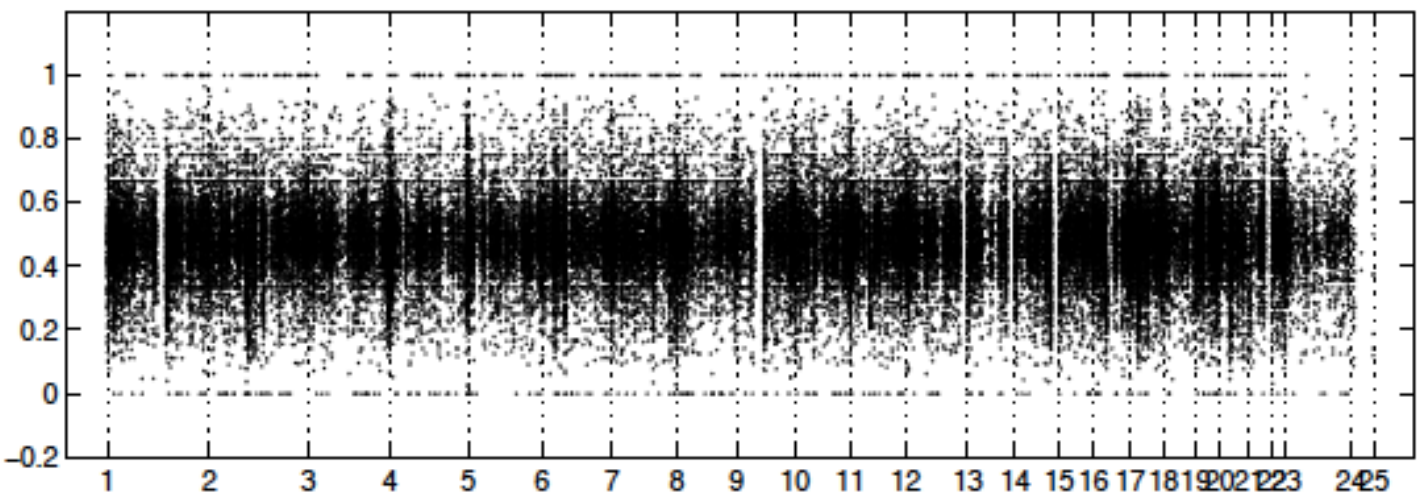

370\_ucsc.edu\_BRCA.IlluminaGA\_DNASeq.Level\_2.10.0.0\_TCGA-BH-A0BC\_D  
germline-het

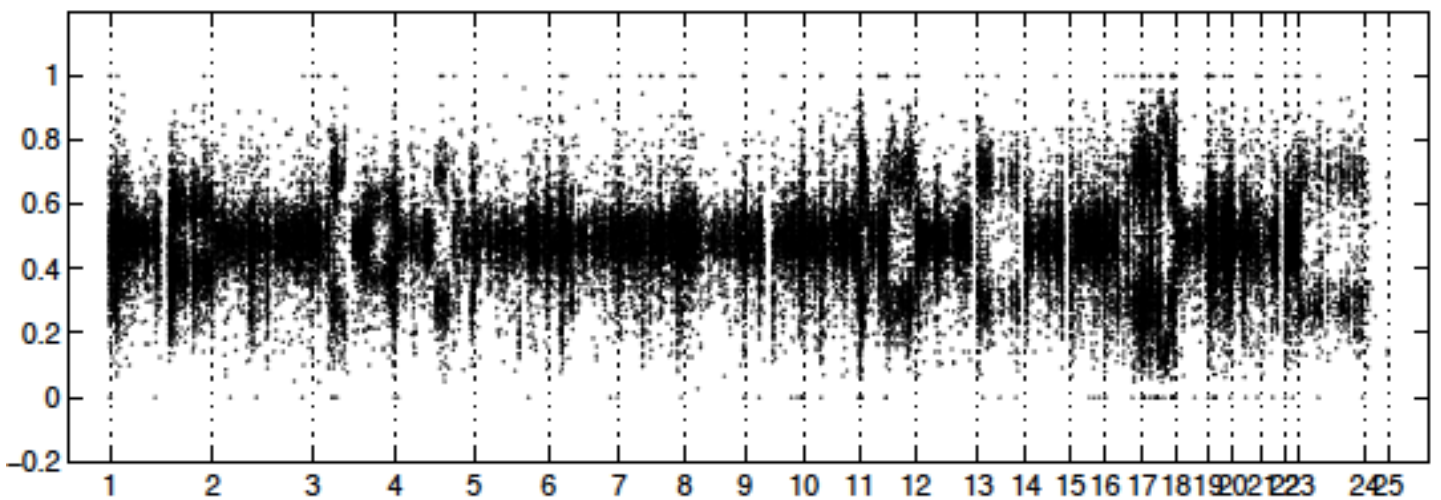

371\_ucsc.edu\_BRCA.IlluminaGA\_DNASeq.Level\_2.11.0.0\_TCGA-C8-A12T\_D  
germline-het

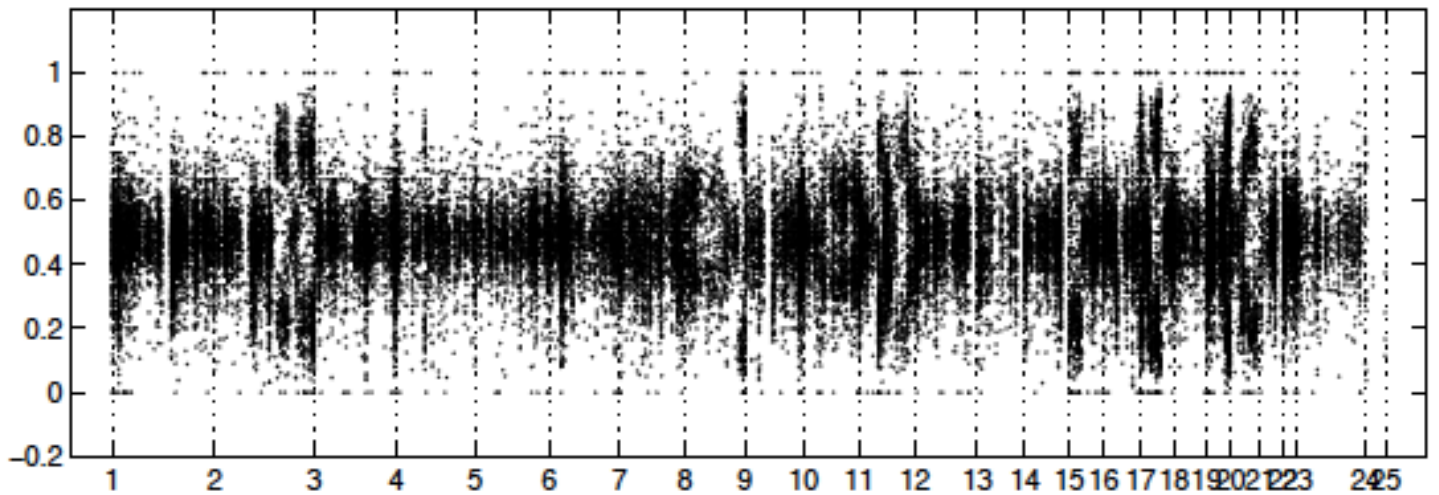

372\_ucsc.edu\_BRCA.IlluminaGA\_DNASeq.Level\_2.4.0.0\_TCGA-A8-A07G\_W  
germline-het

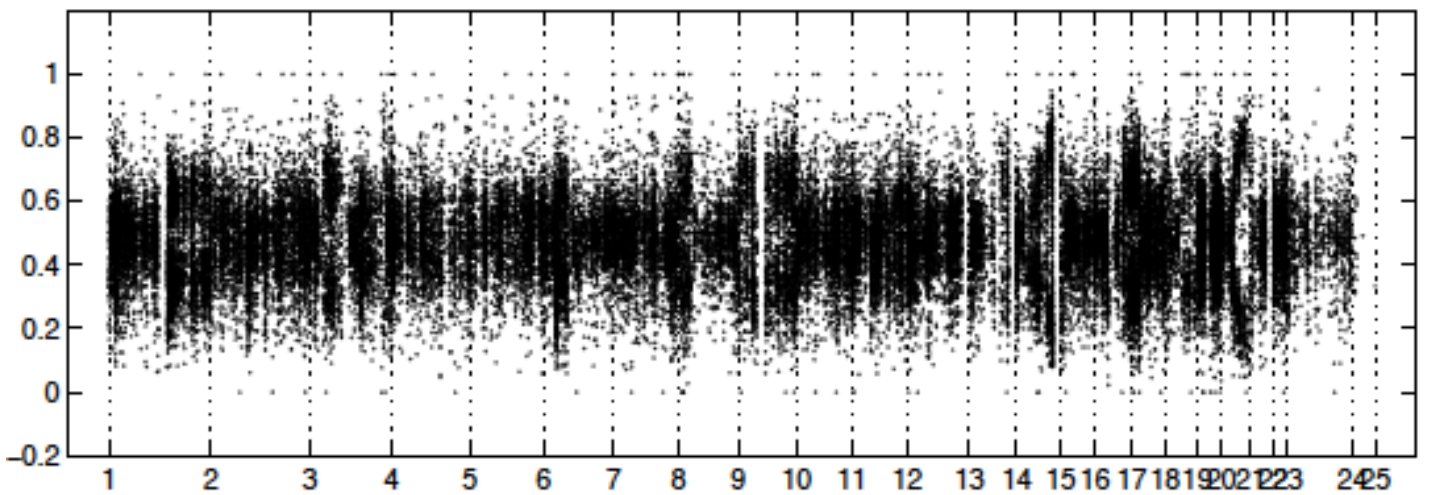

373\_ucsc.edu\_BRCA.IlluminaGA\_DNASeq.Level\_2.4.0.0\_TCGA-A8-A09Z\_W  
germline-het

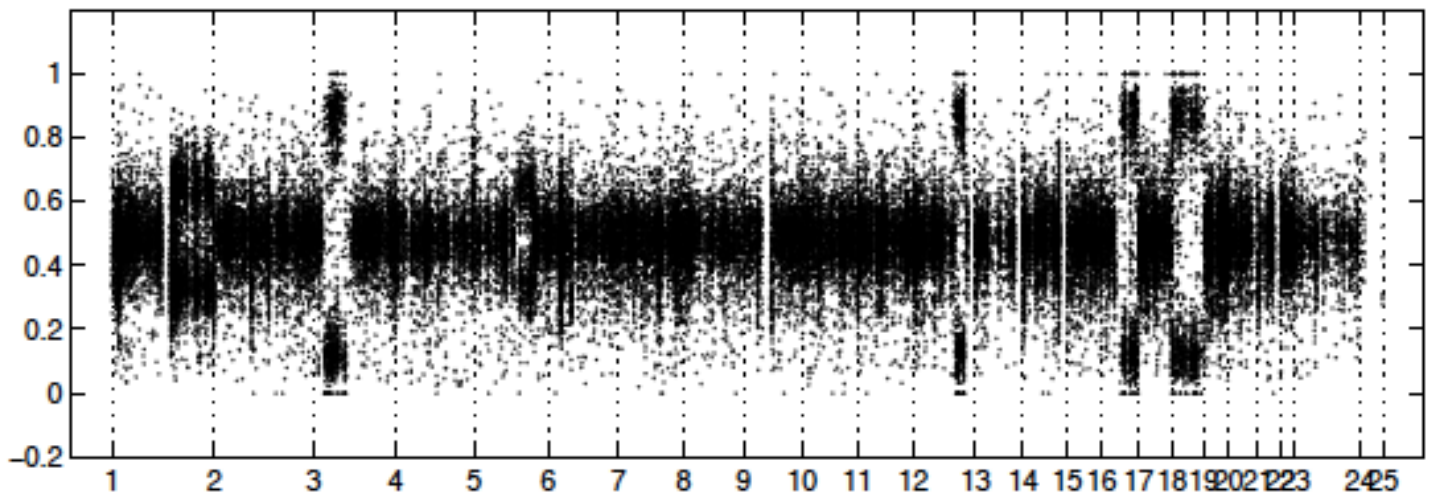

374\_ucsc.edu\_BRCA.IlluminaGA\_DNASeq.Level\_2.9.0.0\_TCGA-B6-A0X5\_D  
germline-het

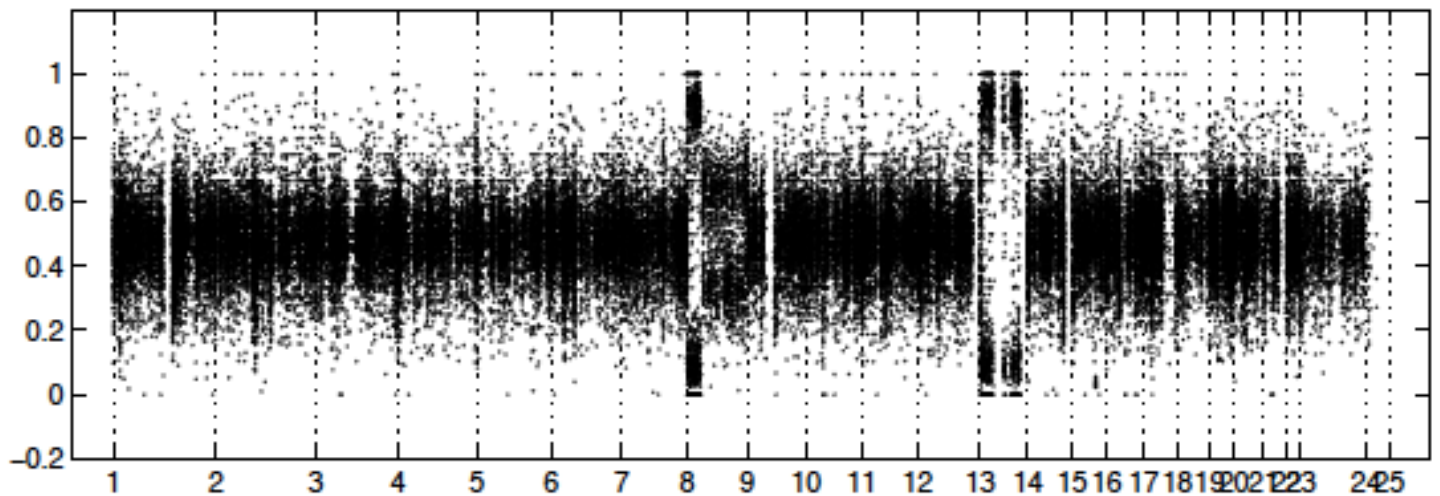

375\_ucsc.edu\_BRCA.IlluminaGA\_DNASeq.Level\_2.4.0.0\_TCGA-A8-A08Z\_W  
germline-het

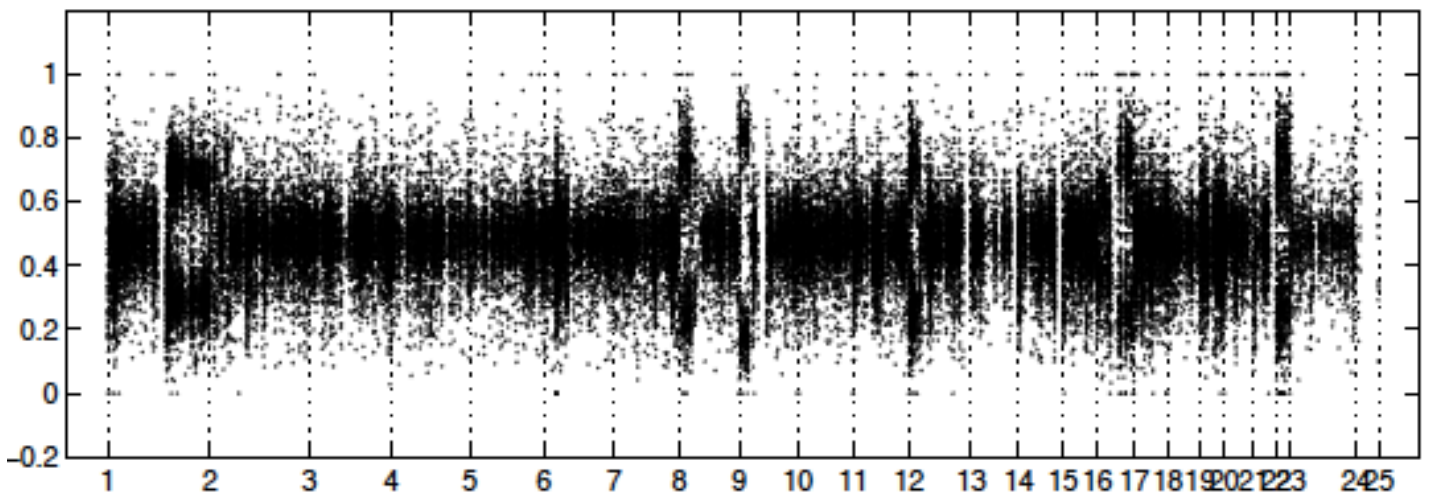

376\_ucsc.edu\_BRCA.IlluminaGA\_DNASeq.Level\_2.3.0.0\_TCGA-A7-A0CG\_W  
germline-het

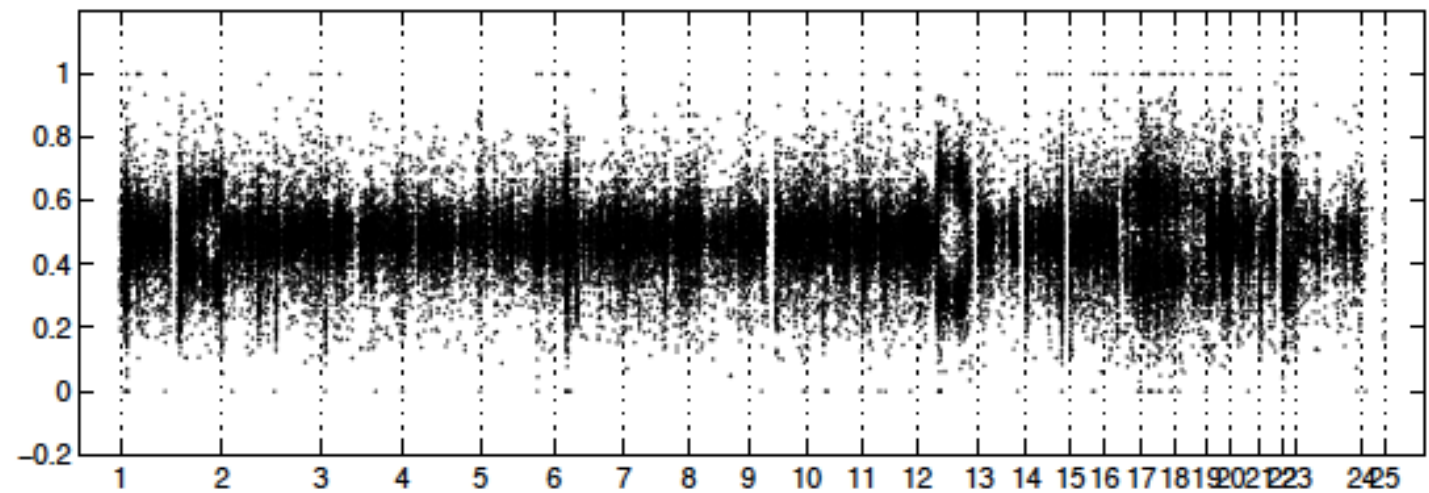

377\_ucsc.edu\_BRCA.IlluminaGA\_DNASeq.Level\_2.13.0.0\_TCGA-E2-A14N\_D  
germline-het

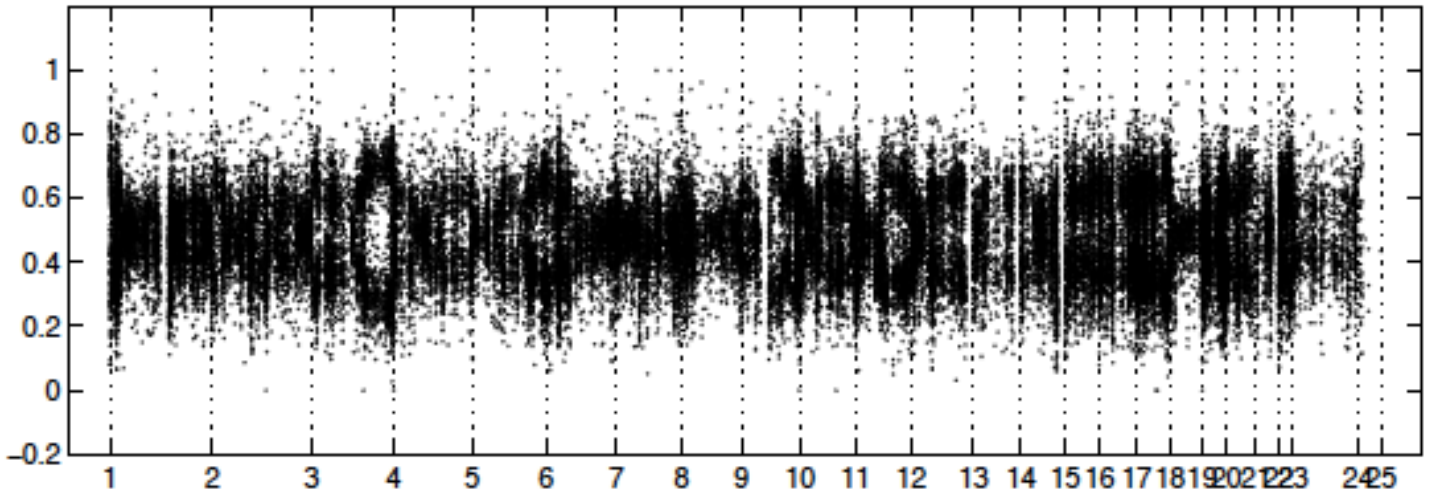

378\_ucsc.edu\_BRCA.IlluminaGA\_DNASeq.Level\_2.4.0.0\_TCGA-A8-A07U\_W  
germline-het

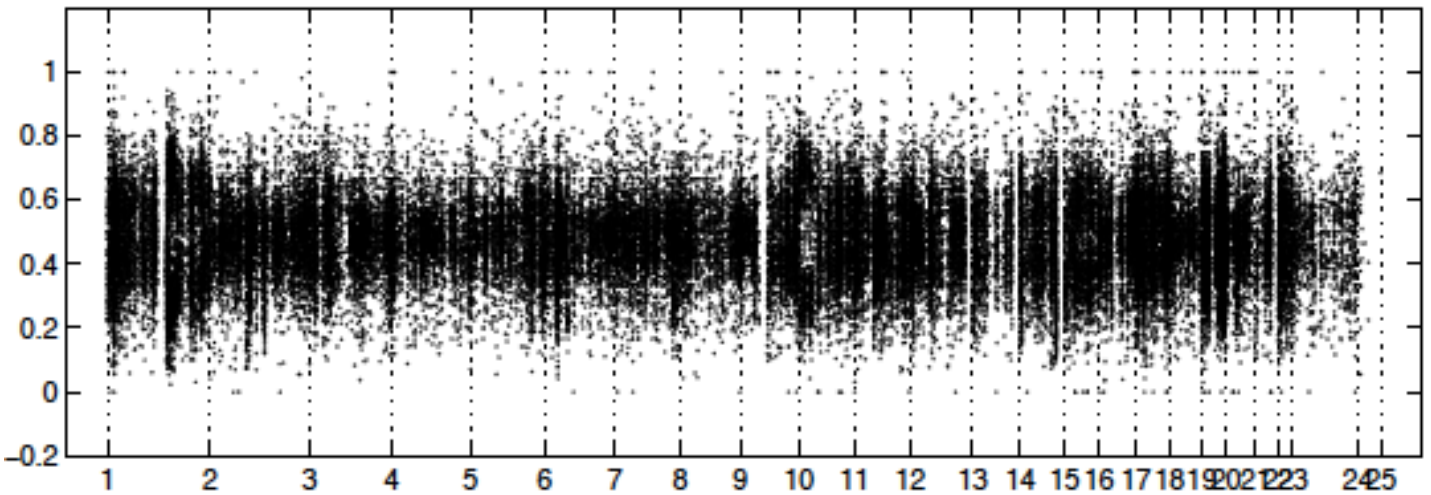

379\_ucsc.edu\_BRCA.IlluminaGA\_DNASeq.Level\_2.4.0.0\_TCGA-A8-A0A1\_W  
germline-het

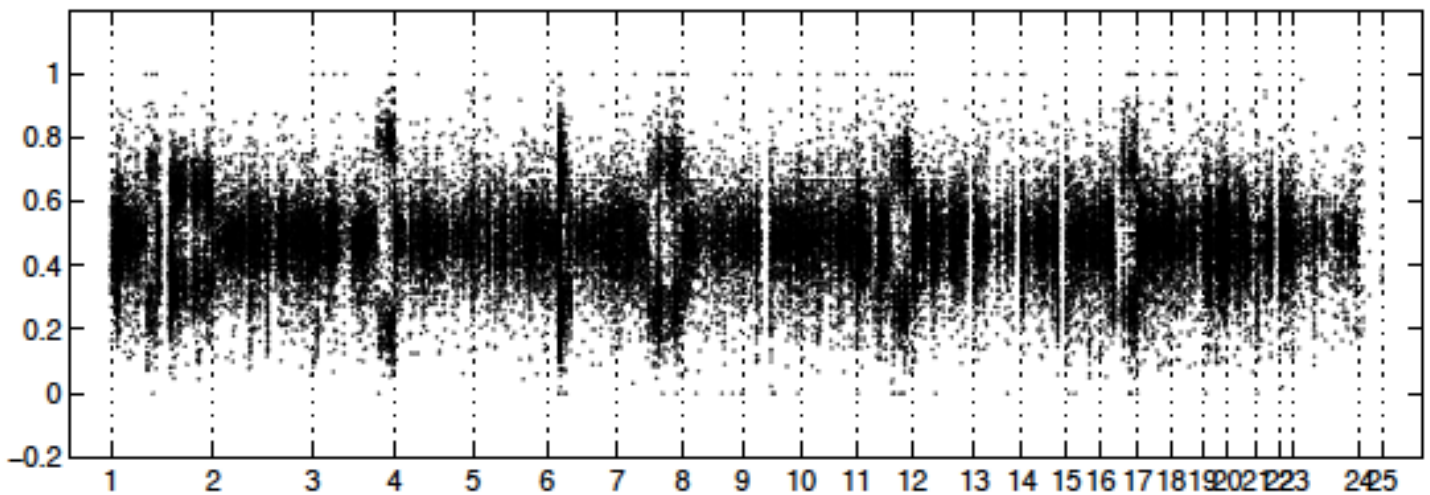



380\_ucsc.edu\_BRCA.IlluminaGA\_DNASeq.Level\_2.5.0.0\_TCGA-AN-A0XO\_D  
germline-het

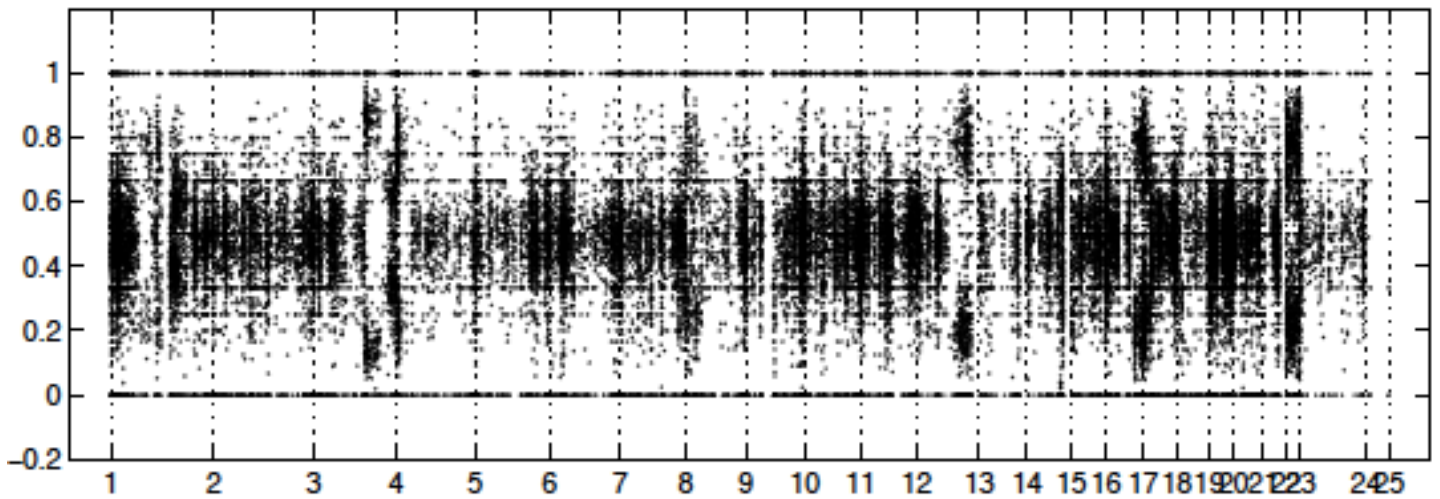

381\_ucsc.edu\_BRCA.IlluminaGA\_DNASeq.Level\_2.6.0.0\_TCGA-AO-A126\_D  
germline-het

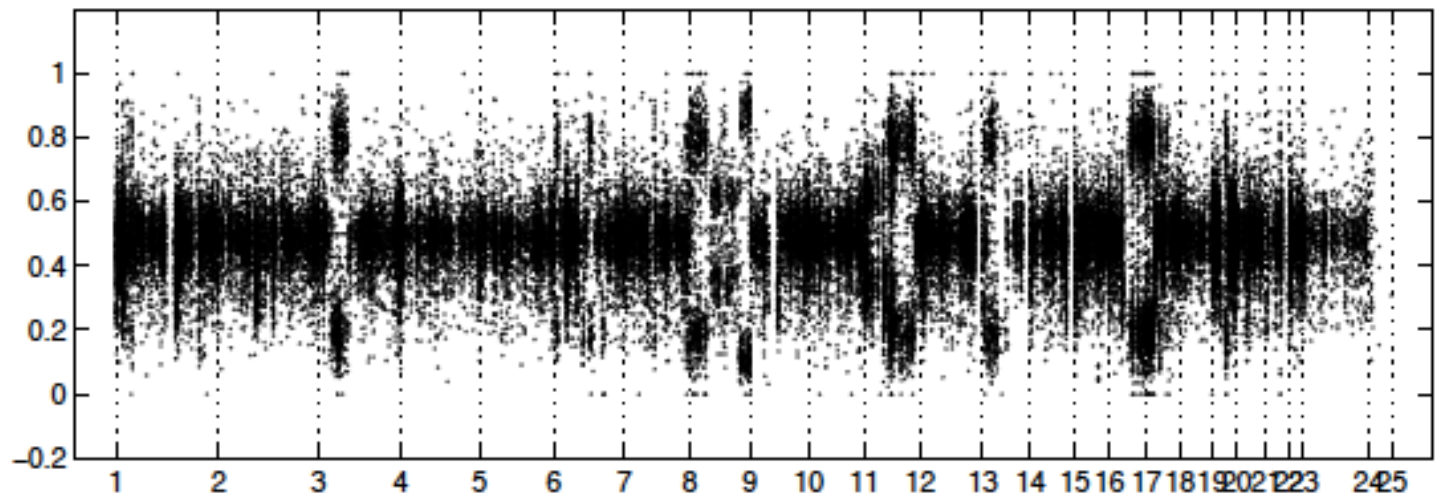

382\_ucsc.edu\_BRCA.IlluminaGA\_DNASeq.Level\_2.10.0.0\_TCGA-BH-A0BM\_W  
germline-het

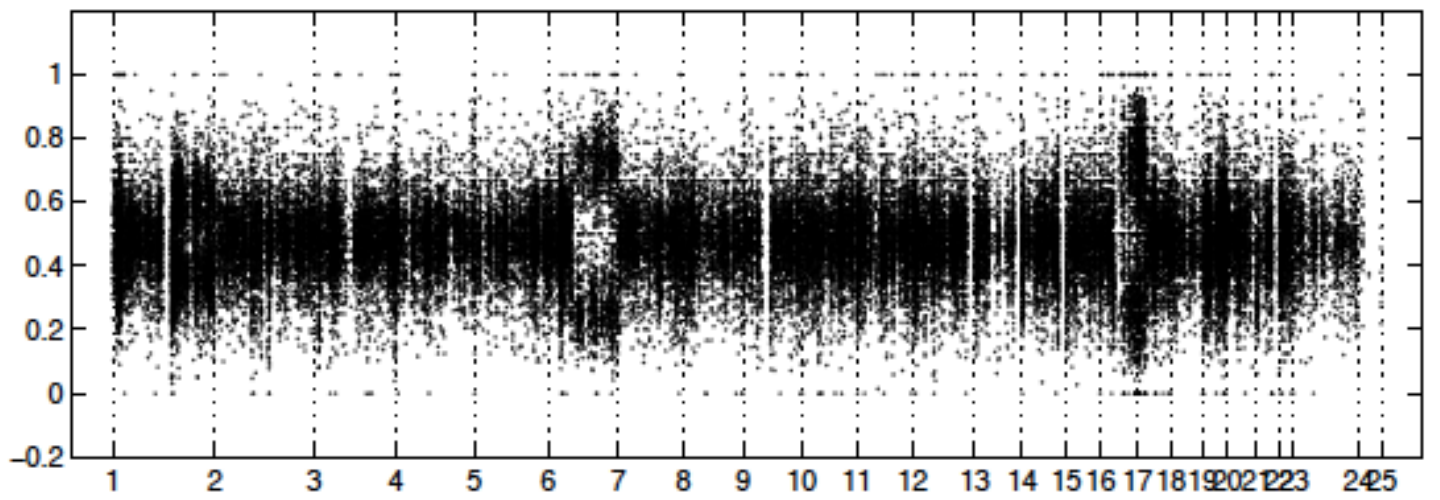

383\_ucsc.edu\_BRCA.IlluminaGA\_DNASeq.Level\_2.9.0.0\_TCGA-B6-A0WY\_D  
germline-het

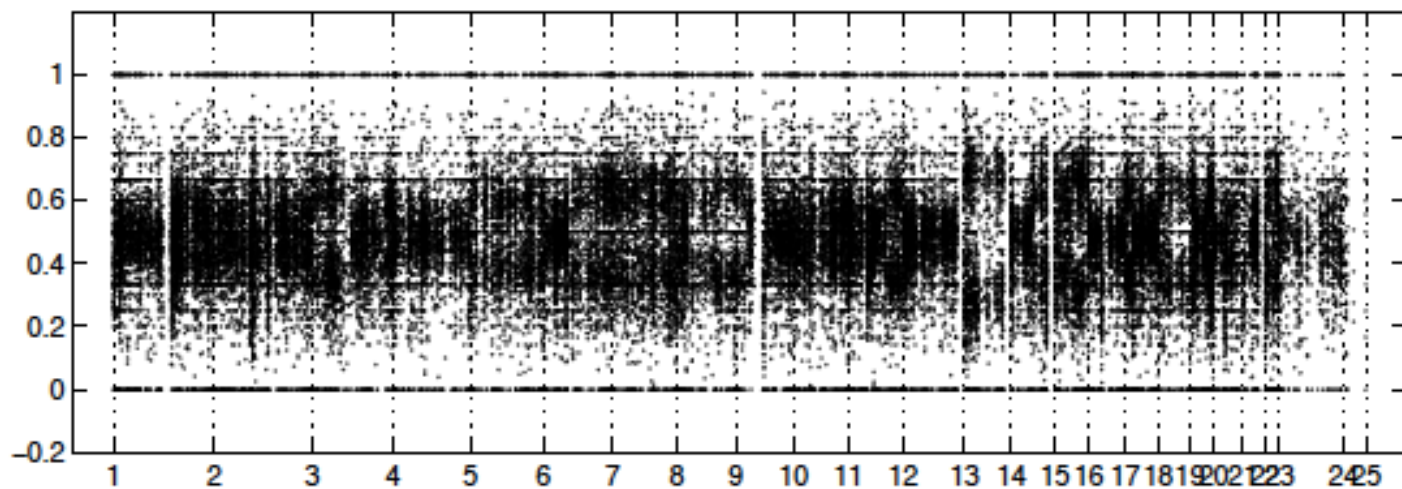

384\_ucsc.edu\_BRCA.IlluminaGA\_DNASeq.Level\_2.3.0.0\_TCGA-A7-A0CH\_W  
germline-het

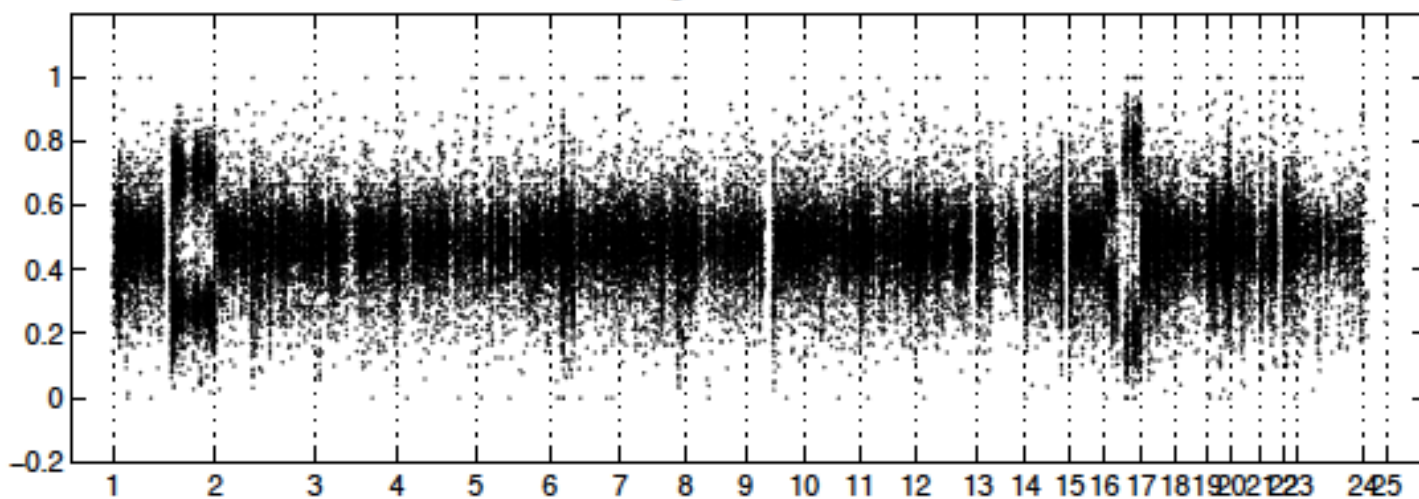

385\_ucsc.edu\_BRCA.IlluminaGA\_DNASeq.Level\_2.10.0.0\_TCGA-BH-A18M\_D  
germline-het

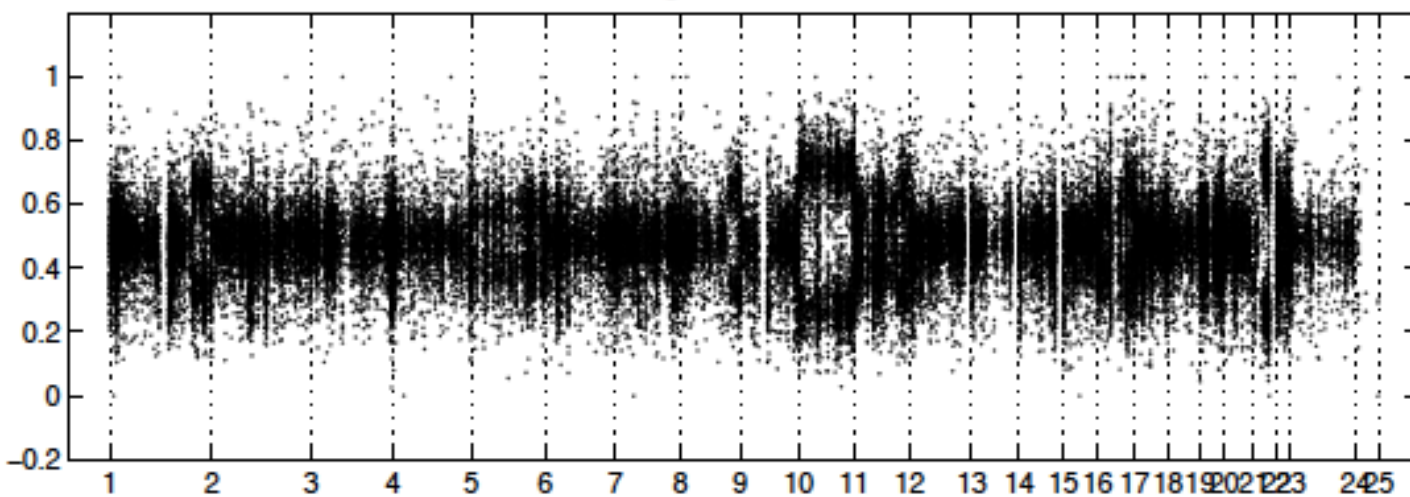

386\_ucsc.edu\_BRCA.IlluminaGA\_DNASeq.Level\_2.4.0.0\_TCGA-A8-A0A6\_W  
germline-het

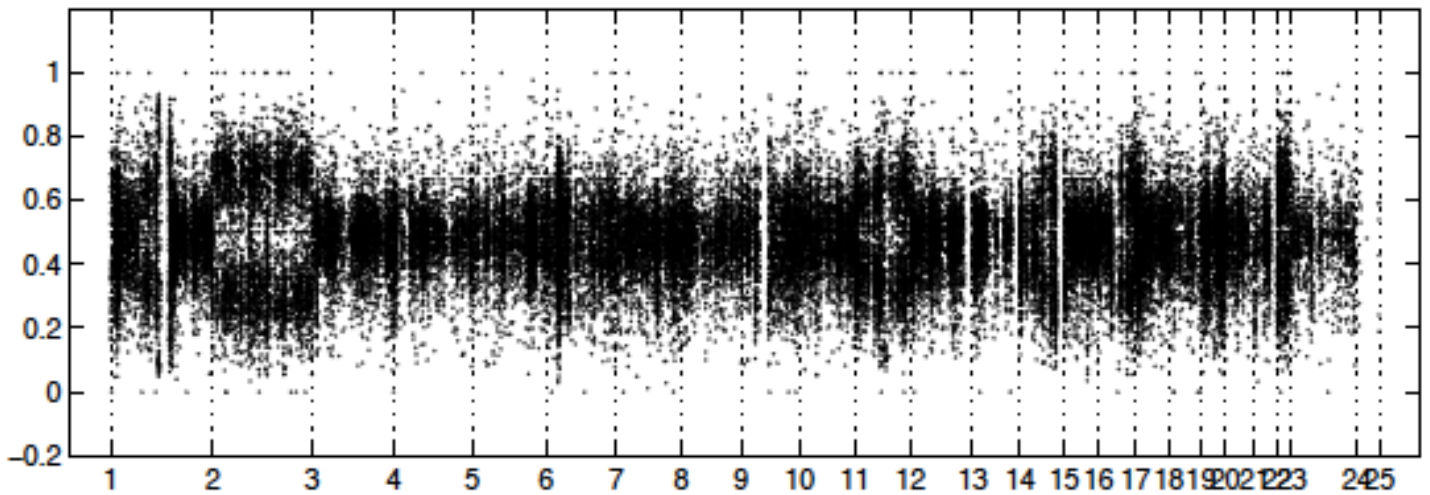

387\_ucsc.edu\_BRCA.IlluminaGA\_DNASeq.Level\_2.12.0.0\_TCGA-D8-A140\_D  
germline-het

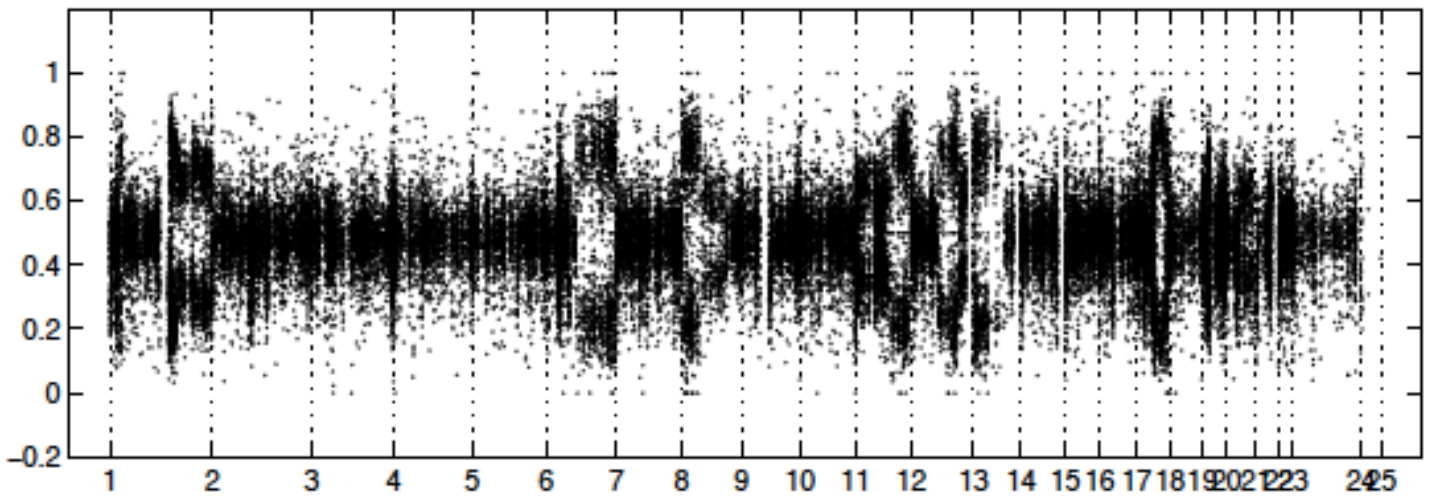

388\_ucsc.edu\_BRCA.IlluminaGA\_DNASeq.Level\_2.8.0.0\_TCGA-AR-A1AU\_D  
germline-het

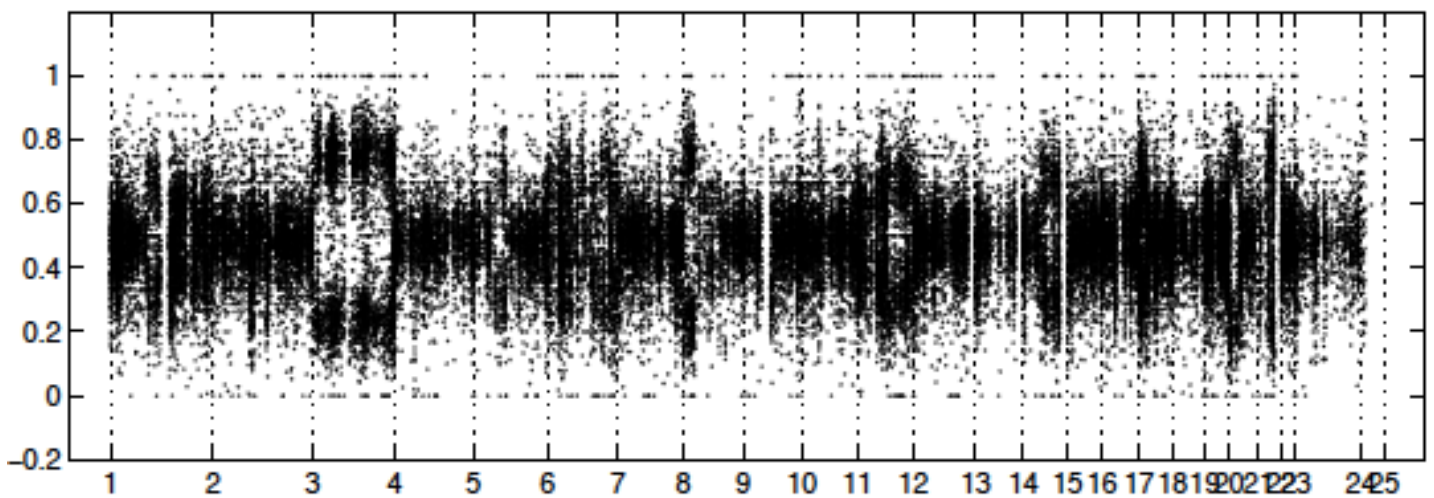

389\_ucsc.edu\_BRCA.IlluminaGA\_DNASeq.Level\_2.8.0.0\_TCGA-AR-A1AK\_D  
germline-het

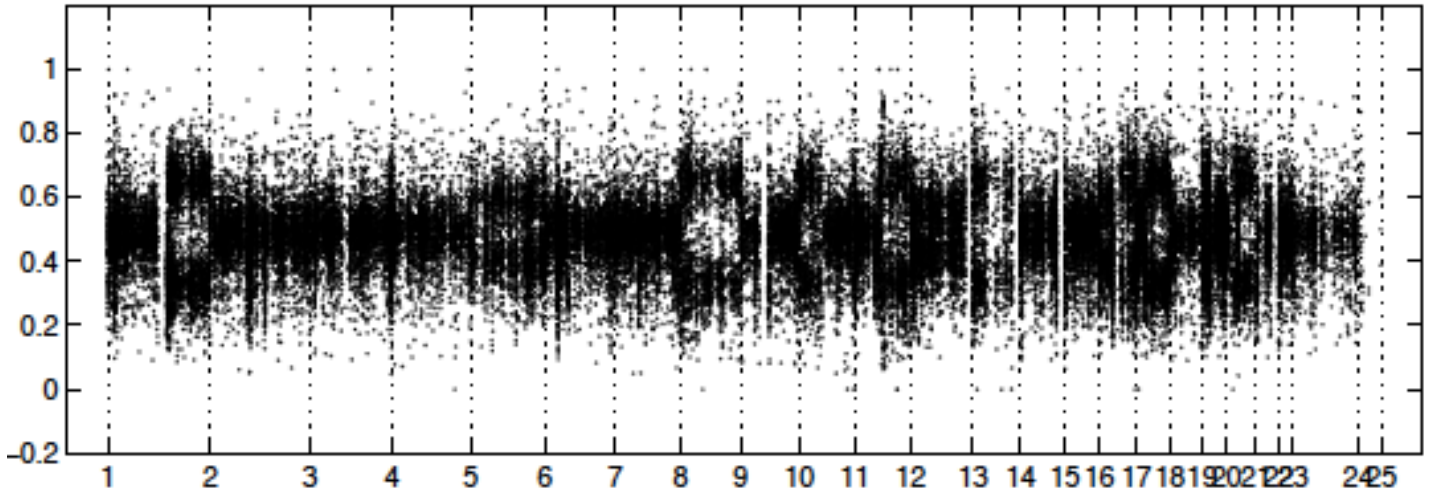

390\_ucsc.edu\_BRCA.IlluminaGA\_DNASeq.Level\_2.2.0.0\_TCGA-A2-A0T1\_D  
germline-het

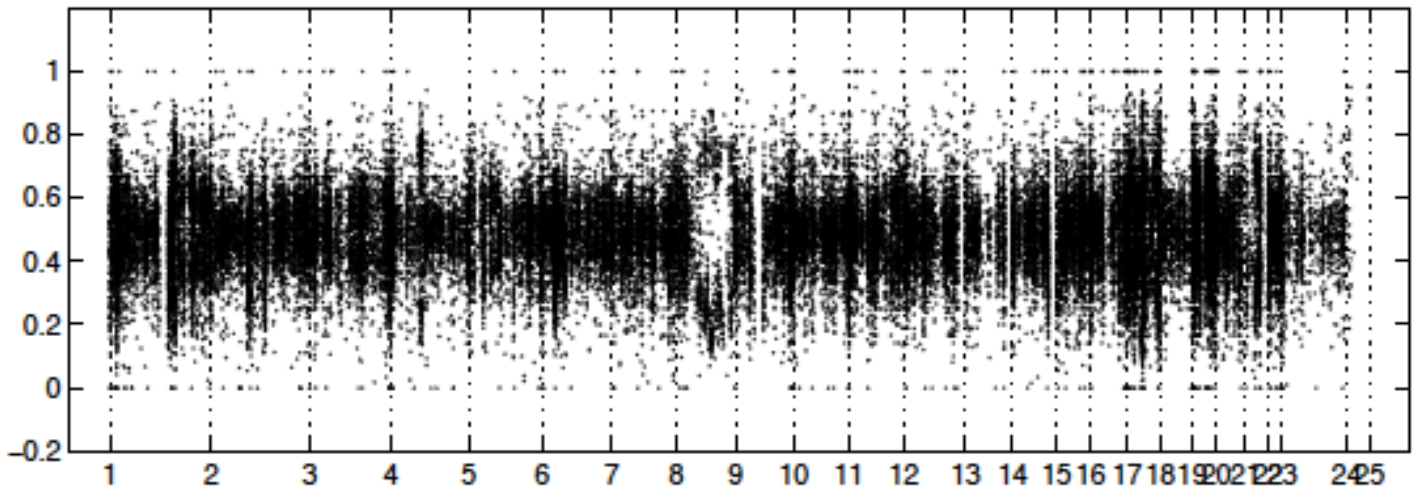

391\_ucsc.edu\_BRCA.IlluminaGA\_DNASeq.Level\_2.2.0.0\_TCGA-A2-A0T7\_D  
germline-het

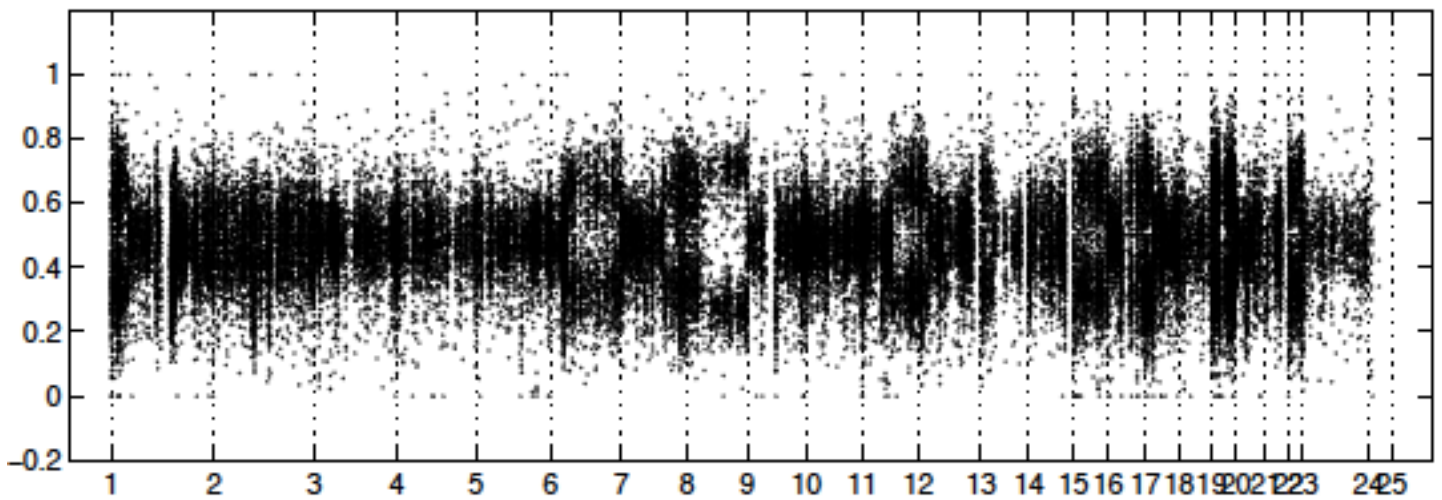

392\_ucsc.edu\_BRCA.IlluminaGA\_DNASeq.Level\_2.5.0.0\_TCGA-AN-A0XS\_D  
germline-het

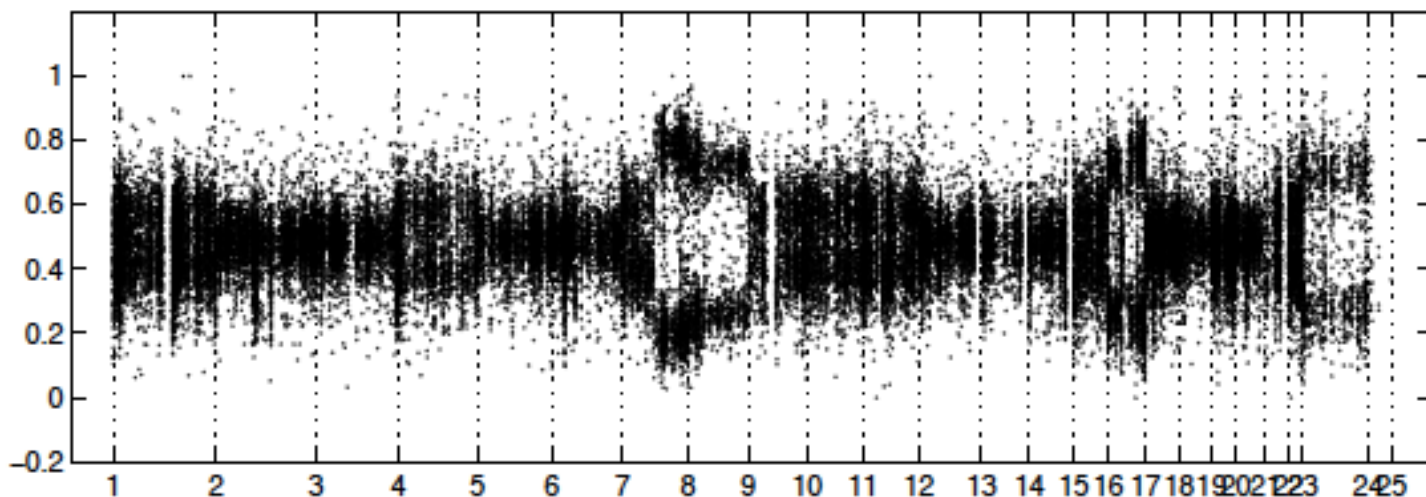

393\_ucsc.edu\_BRCA.IlluminaGA\_DNASeq.Level\_2.9.0.0\_TCGA-B6-A0RH\_D  
germline-het

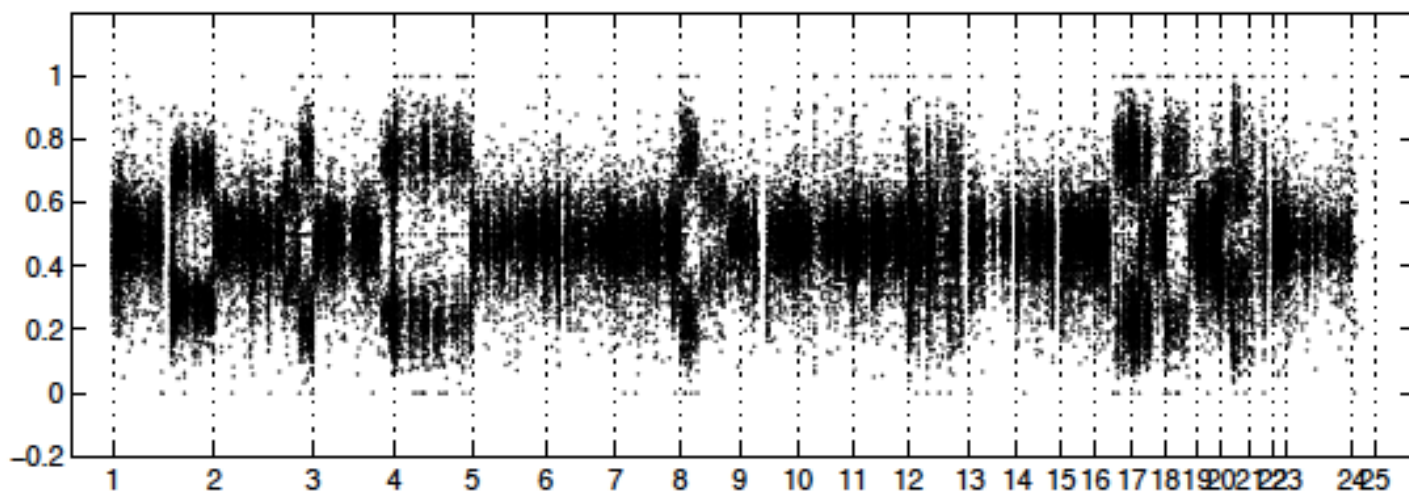

394\_ucsc.edu\_BRCA.IlluminaGA\_DNASeq.Level\_2.6.0.0\_TCGA-AO-A03T\_W  
germline-het

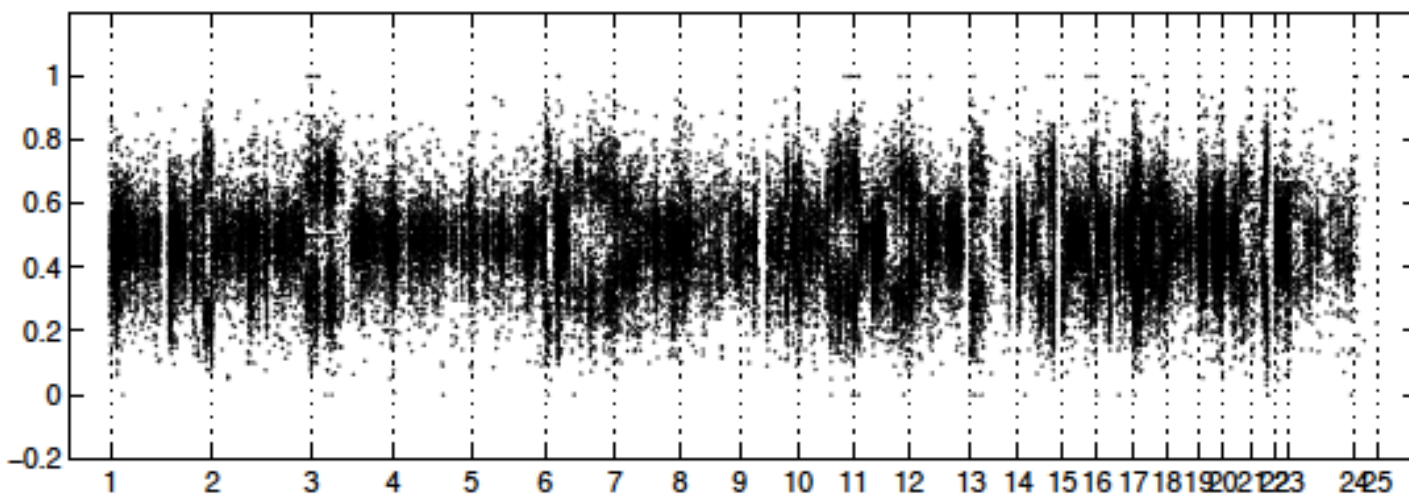

395\_ucsc.edu\_BRCA.IlluminaGA\_DNASeq.Level\_2.9.0.0\_TCGA-B6-A0WT\_D  
germline-het

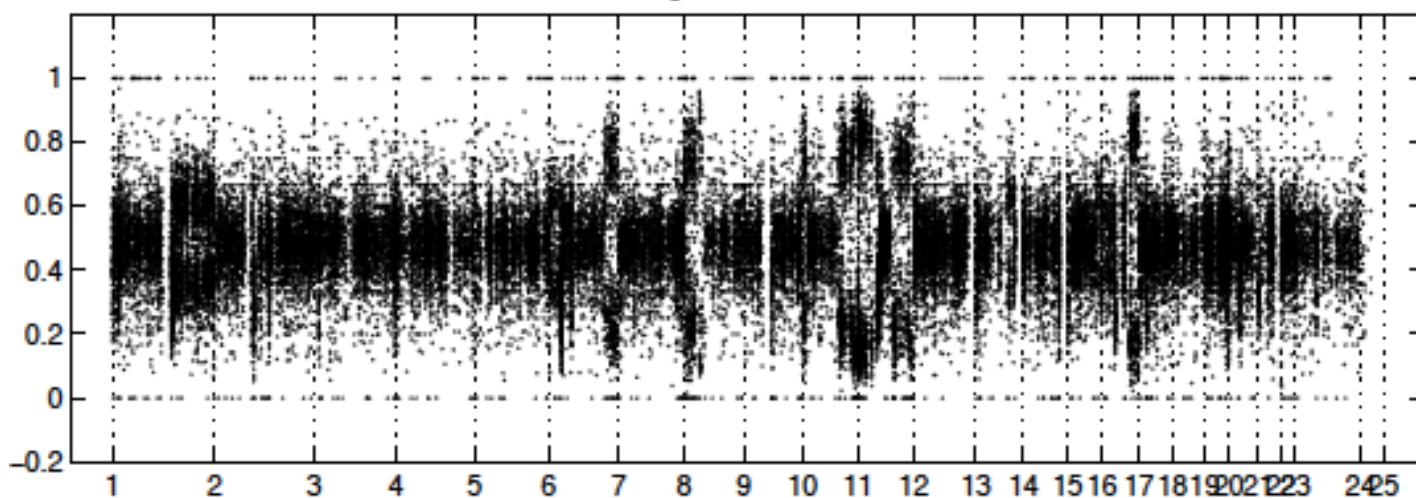

396\_ucsc.edu\_BRCA.IlluminaGA\_DNASeq.Level\_2.2.0.0\_TCGA-A2-A0YF\_D  
germline-het

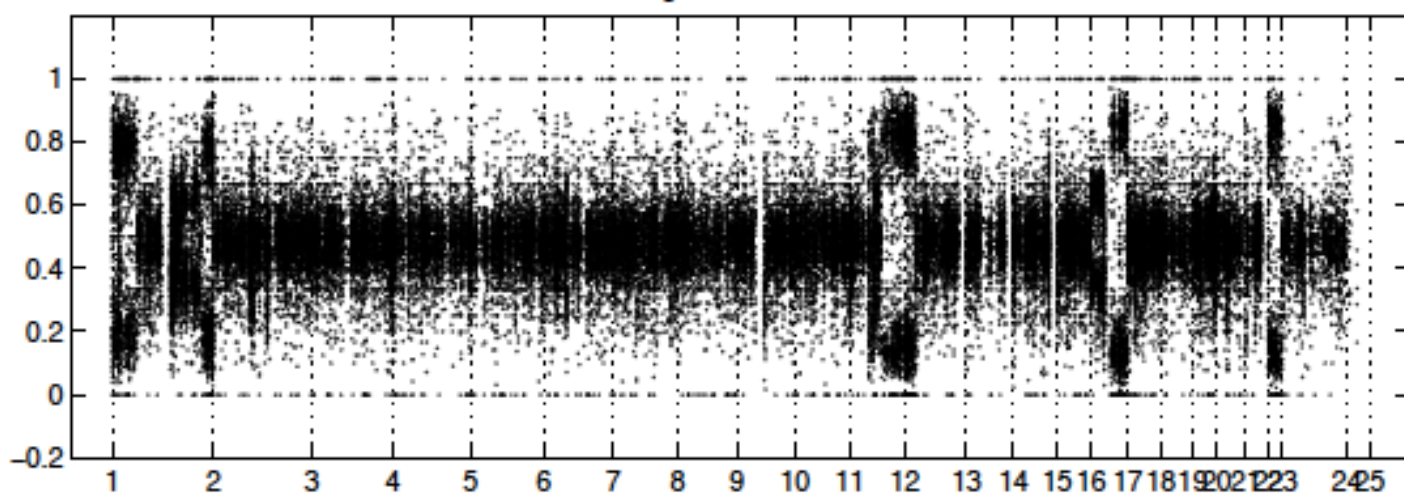

397\_ucsc.edu\_BRCA.IlluminaGA\_DNASeq.Level\_2.10.0.0\_TCGA-BH-A0H9\_W  
germline-het

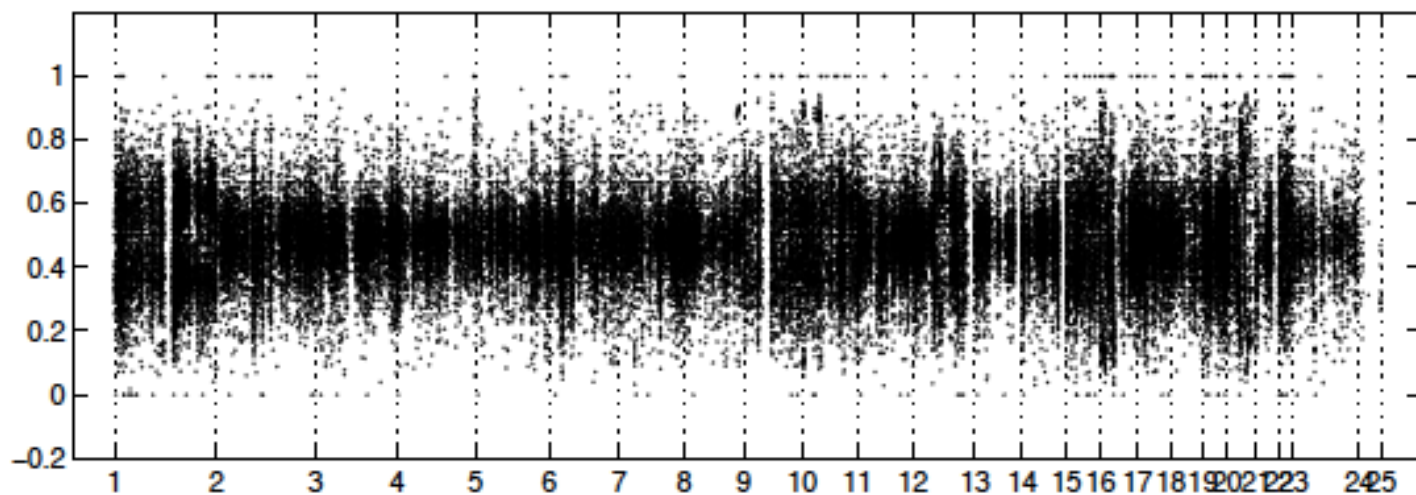

398\_ucsc.edu\_BRCA.IlluminaGA\_DNASeq.Level\_2.6.0.0\_TCGA-AO-A0JJ\_W  
germline-het

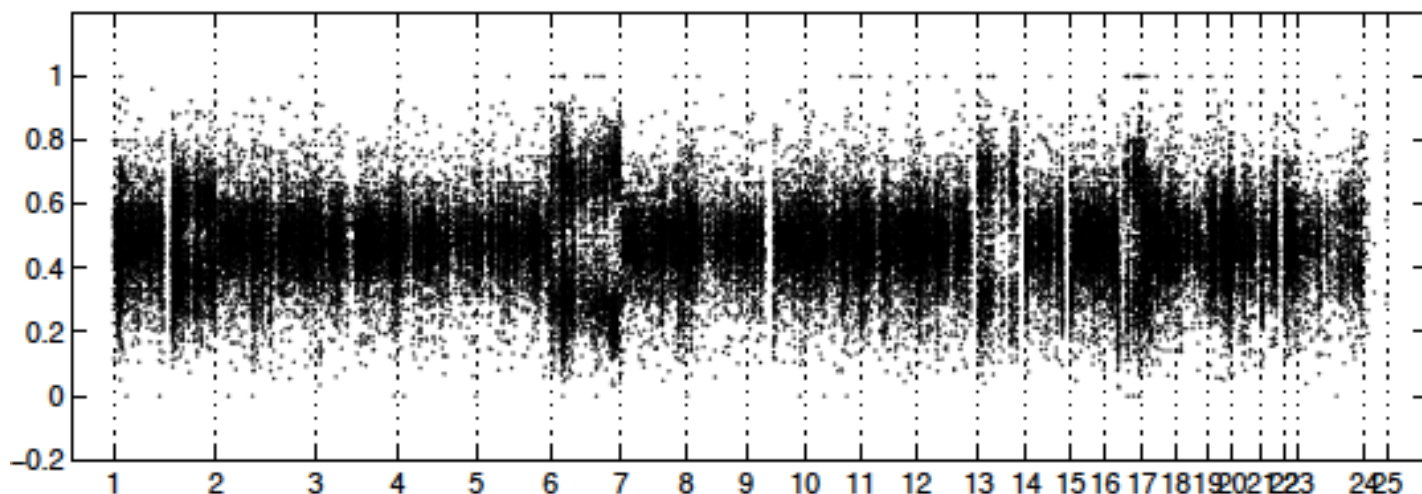

399\_ucsc.edu\_BRCA.IlluminaGA\_DNASeq.Level\_2.13.0.0\_TCGA-E2-A15L\_D  
germline-het

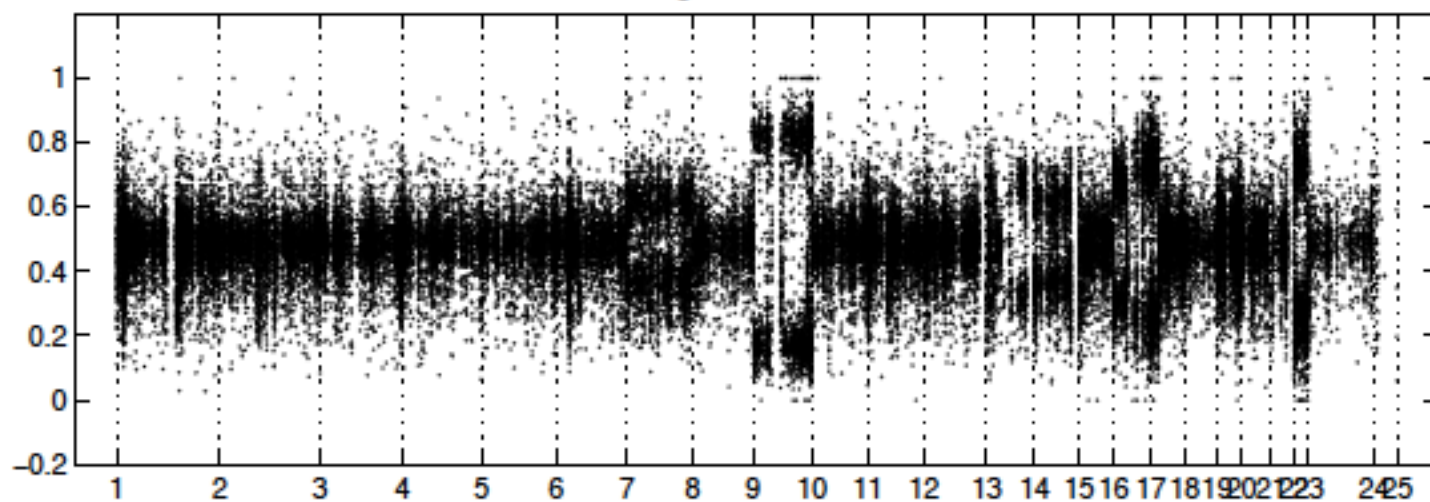

400\_ucsc.edu\_BRCA.IlluminaGA\_DNASeq.Level\_2.10.0.0\_TCGA-BH-A18J\_D  
germline-het

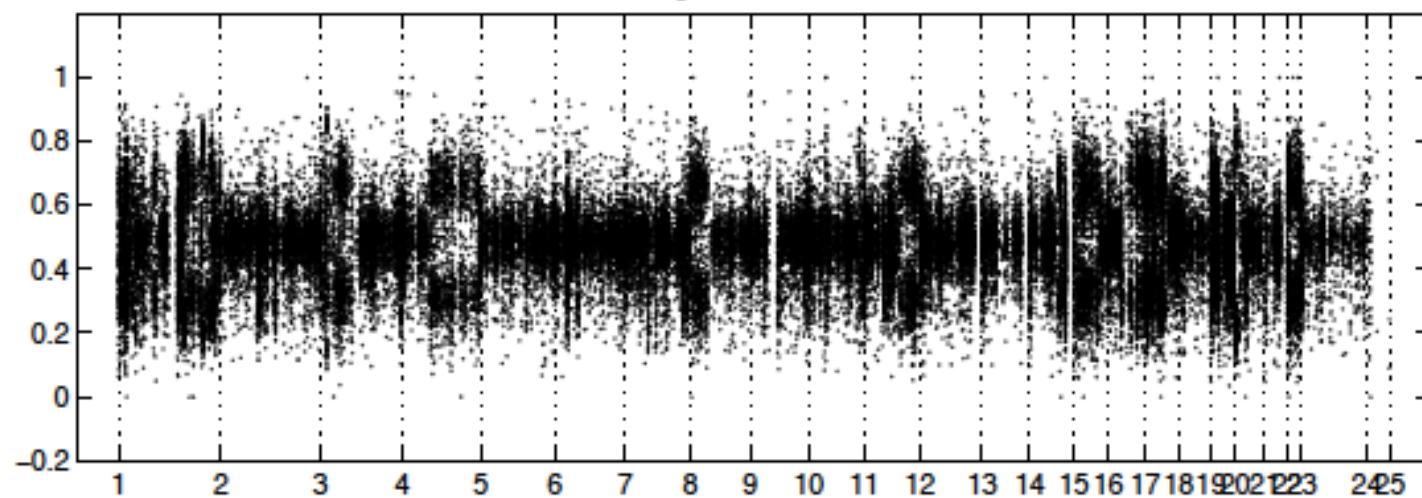

401\_ucsc.edu\_BRCA.IlluminaGA\_DNASeq.Level\_2.5.0.0\_TCGA-A0XR\_D  
germline-het

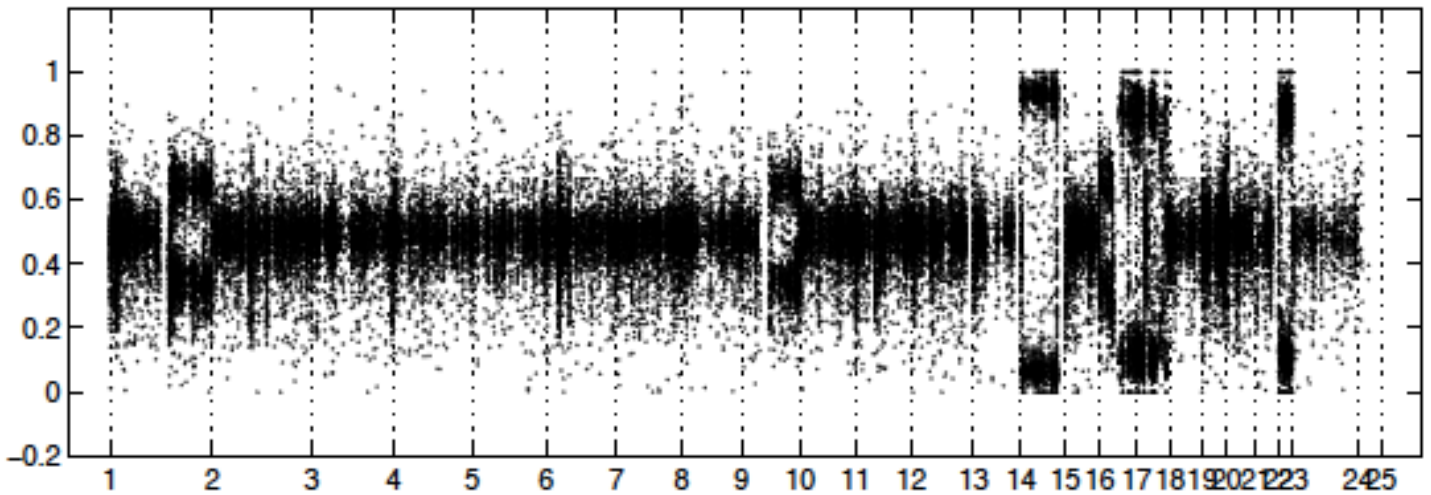

402\_ucsc.edu\_BRCA.IlluminaGA\_DNASeq.Level\_2.2.0.0\_TCGA-A2-A0CP\_W  
germline-het

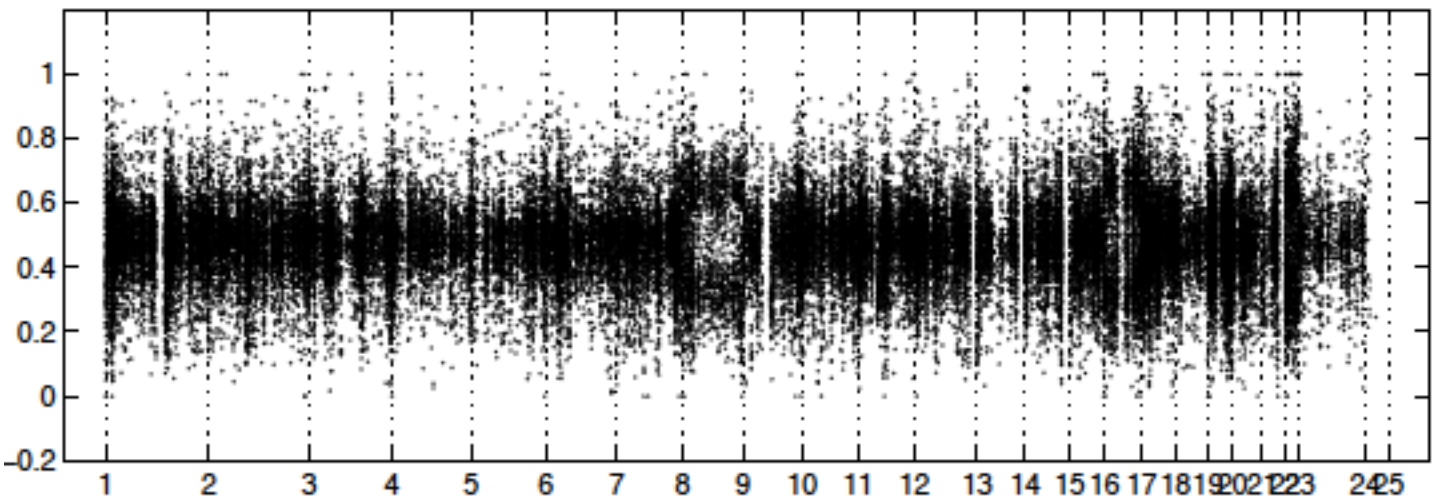

403\_ucsc.edu\_BRCA.IlluminaGA\_DNASeq.Level\_2.1.0.0\_TCGA-A1-A0SD\_D  
germline-het

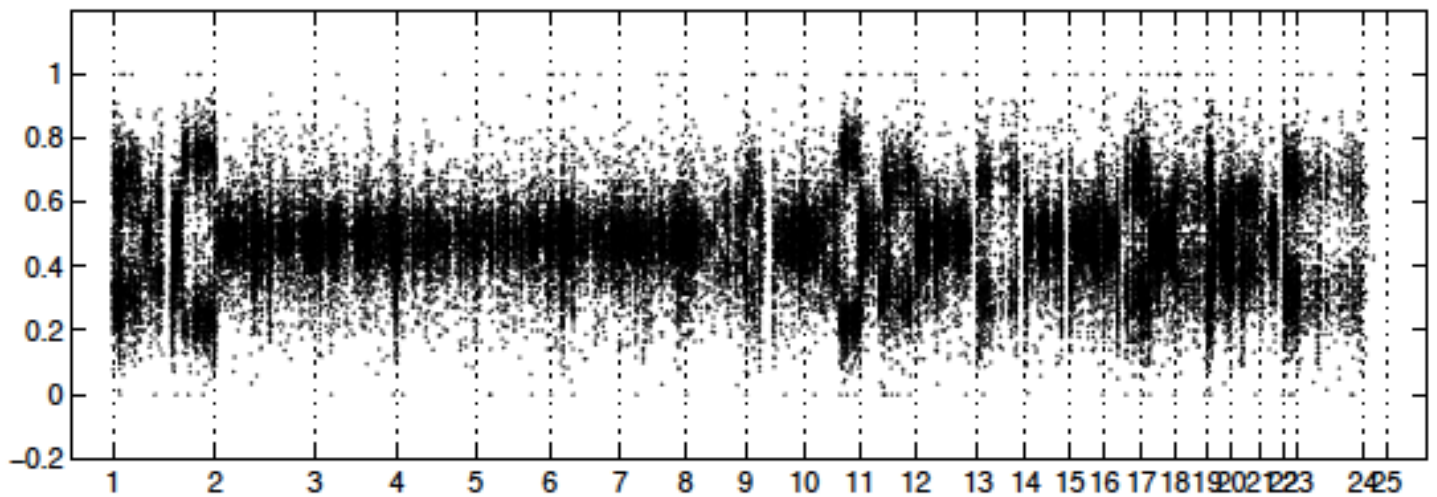



404\_ucsc.edu\_BRCA.IlluminaGA\_DNASeq.Level\_2.2.0.0\_TCGA-A2-A04Y\_W  
germline-het

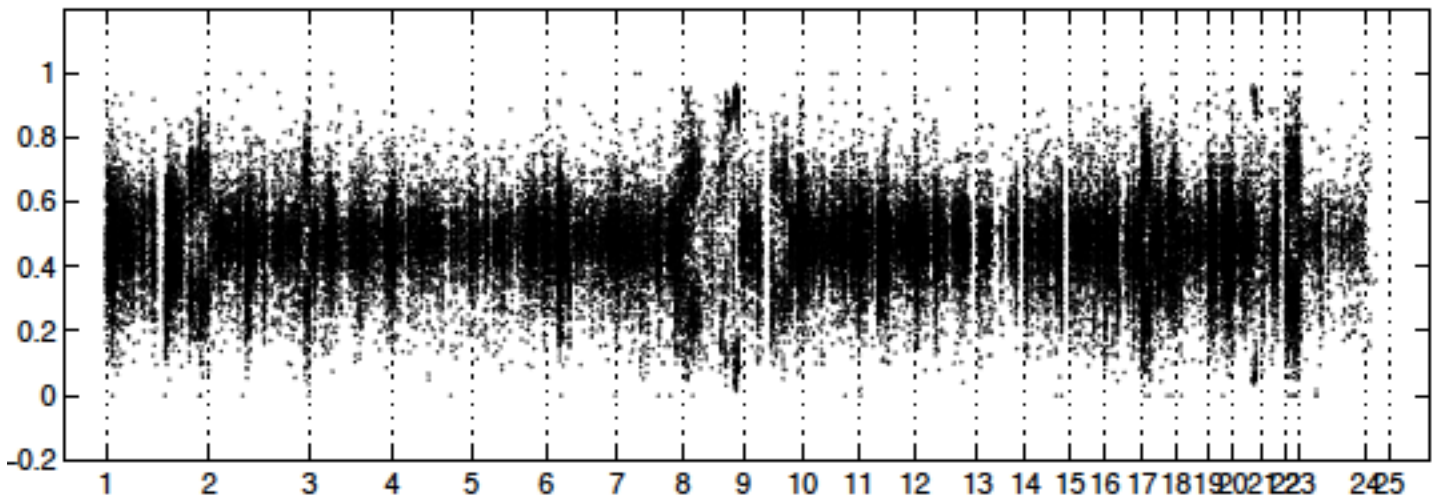

405\_ucsc.edu\_BRCA.IlluminaGA\_DNASeq.Level\_2.6.0.0\_TCGA-A0-A0J5\_W  
germline-het

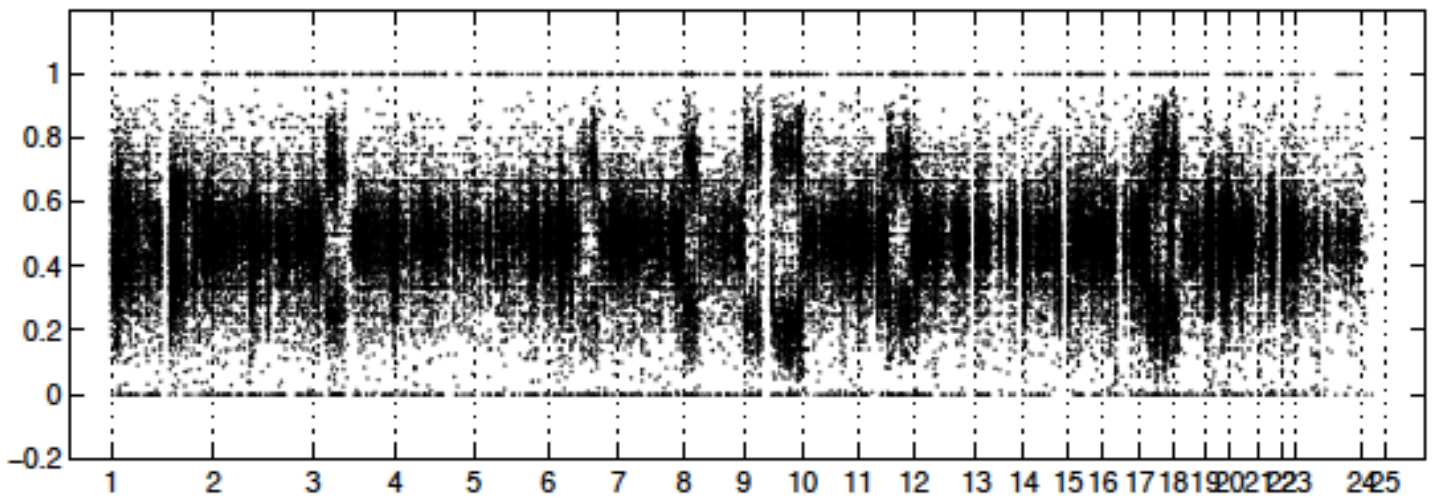

406\_ucsc.edu\_BRCA.IlluminaGA\_DNASeq.Level\_2.9.0.0\_TCGA-B6-A0RI\_W  
germline-het

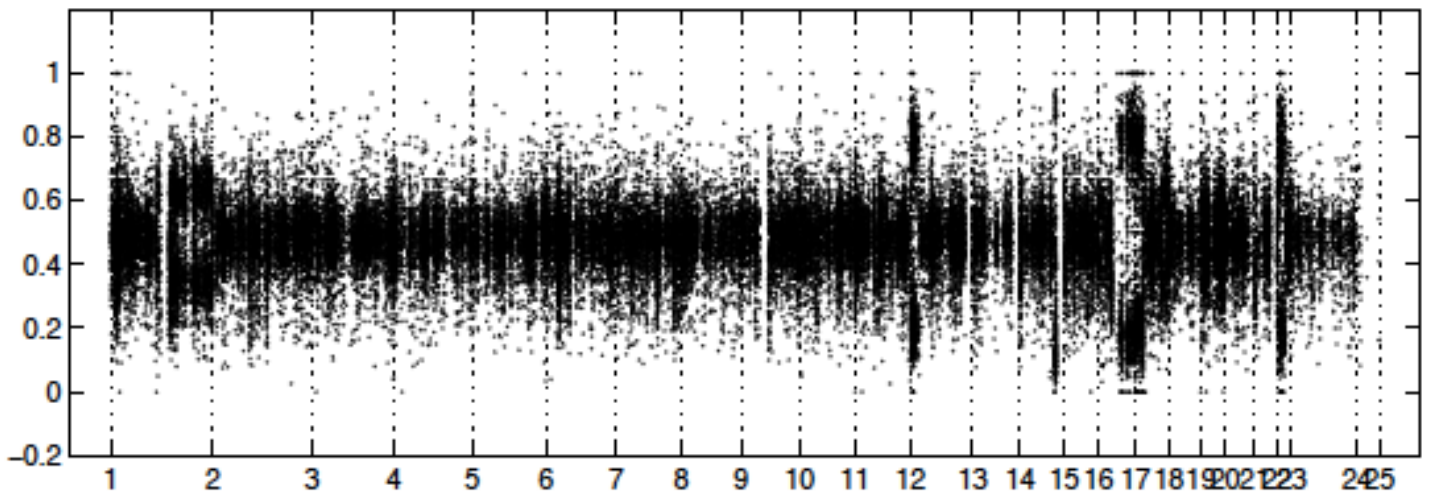

407\_ucsc.edu\_BRCA.IlluminaGA\_DNASeq.Level\_2.6.0.0\_TCGA-A0-A0JE\_W  
germline-het

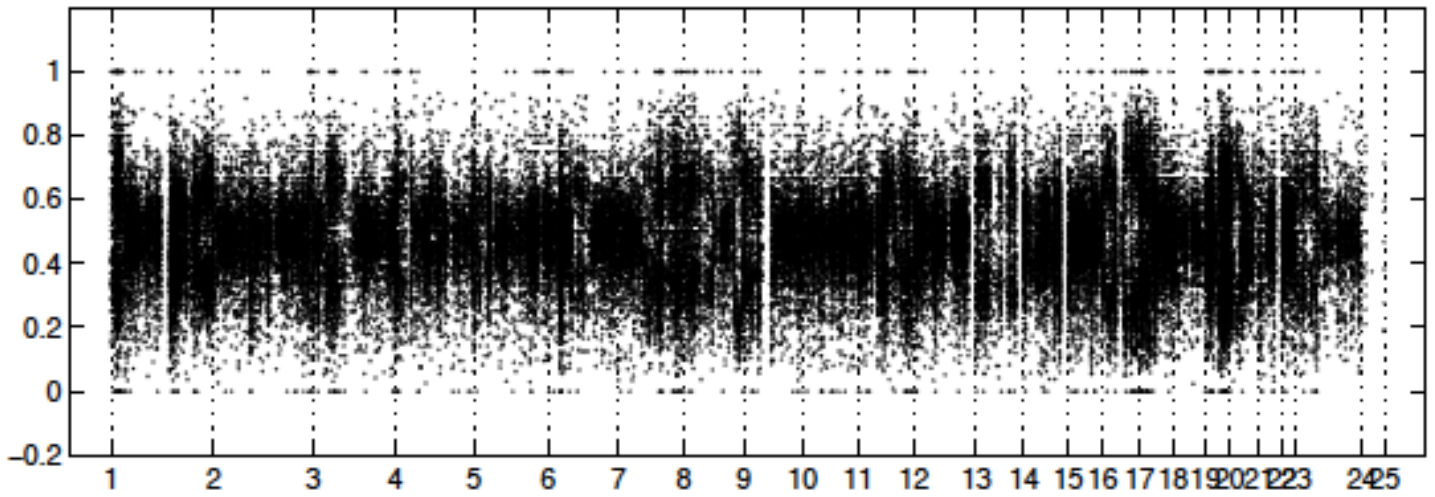

408\_ucsc.edu\_BRCA.IlluminaGA\_DNASeq.Level\_2.2.0.0\_TCGA-A2-A0EM\_W  
germline-het

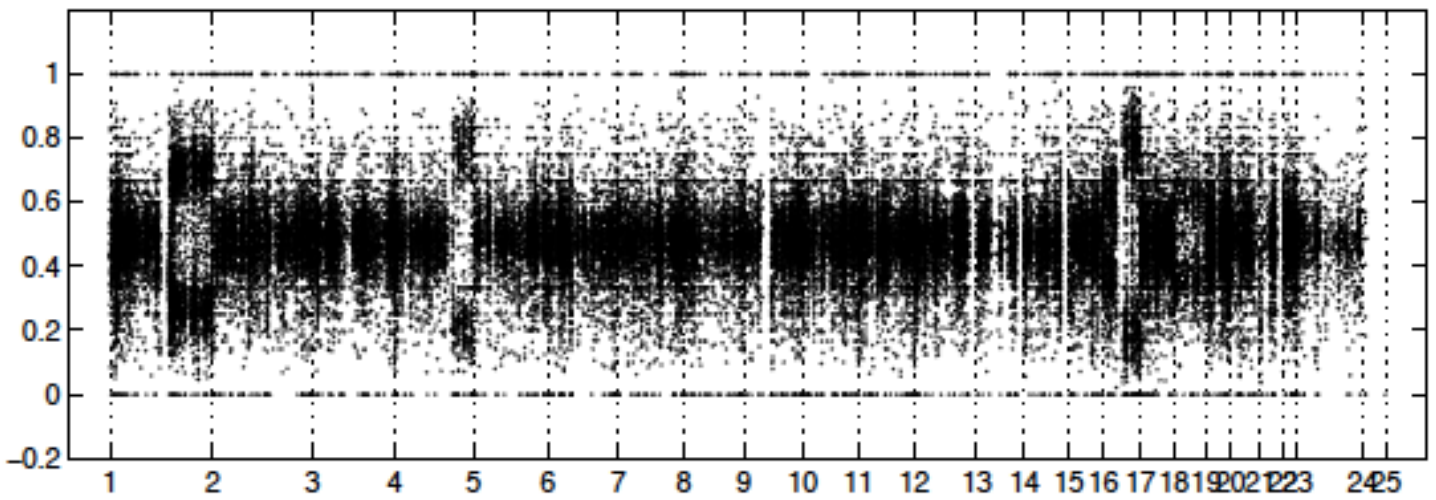

409\_ucsc.edu\_BRCA.IlluminaGA\_DNASeq.Level\_2.1.0.0\_TCGA-A1-A0SE\_D  
germline-het

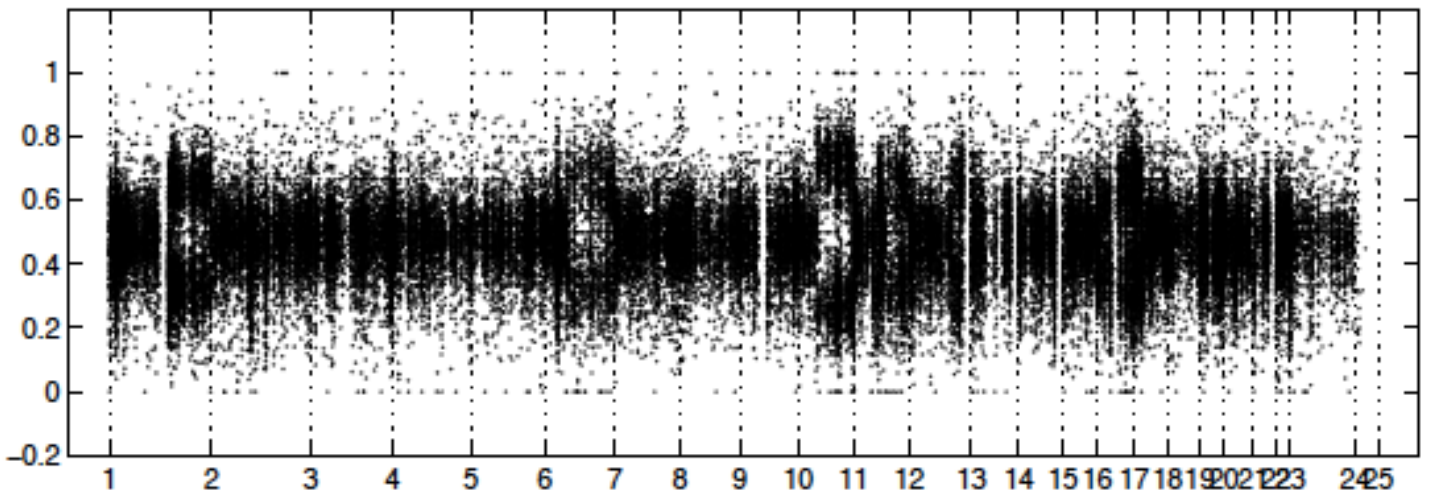

410\_ucsc.edu\_BRCA.IlluminaGA\_DNASeq.Level\_2.9.0.0\_TCGA-B6-A0X7\_D  
germline-het

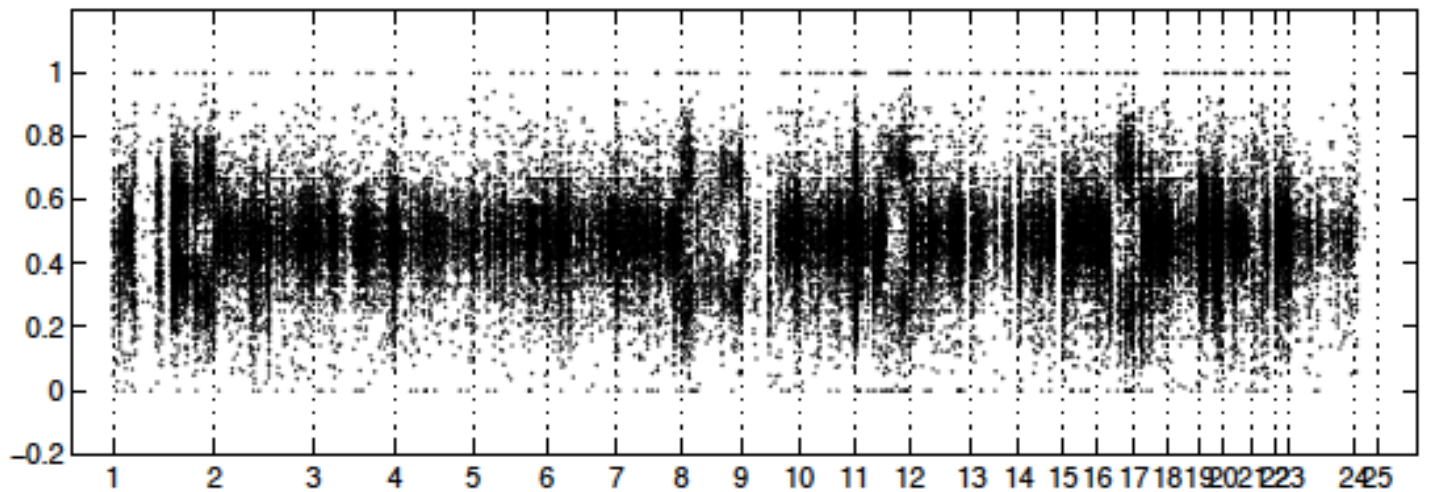

411\_ucsc.edu\_BRCA.IlluminaGA\_DNASeq.Level\_2.13.0.0\_TCGA-E2-A15K\_D  
germline-het

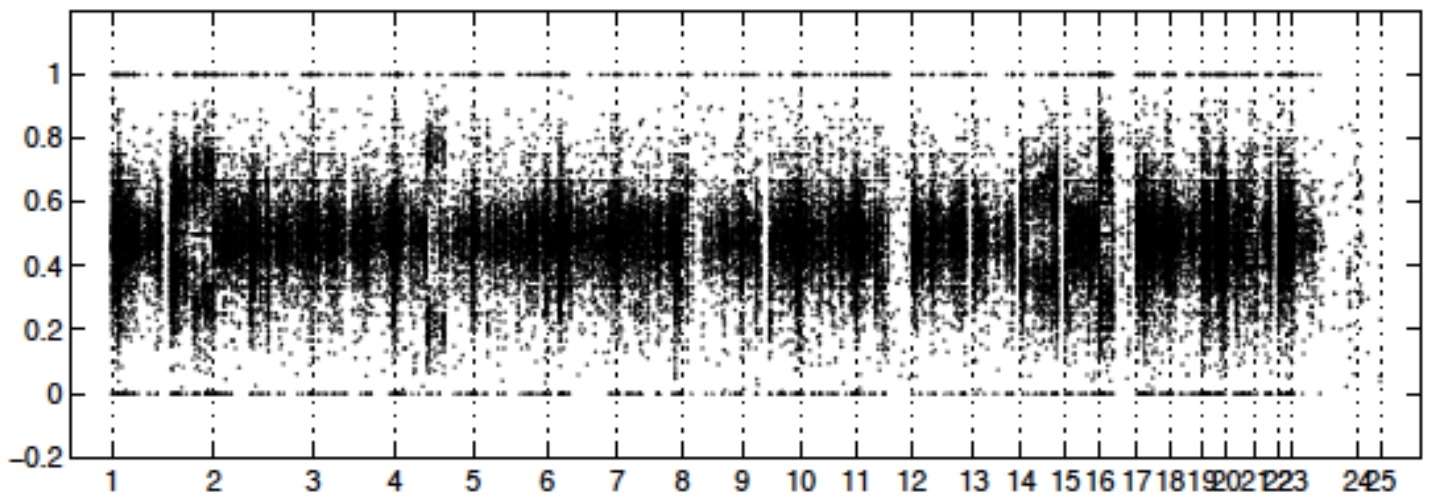

412\_ucsc.edu\_BRCA.IlluminaGA\_DNASeq.Level\_2.5.0.0\_TCGA-AN-A0FF\_W  
germline-het

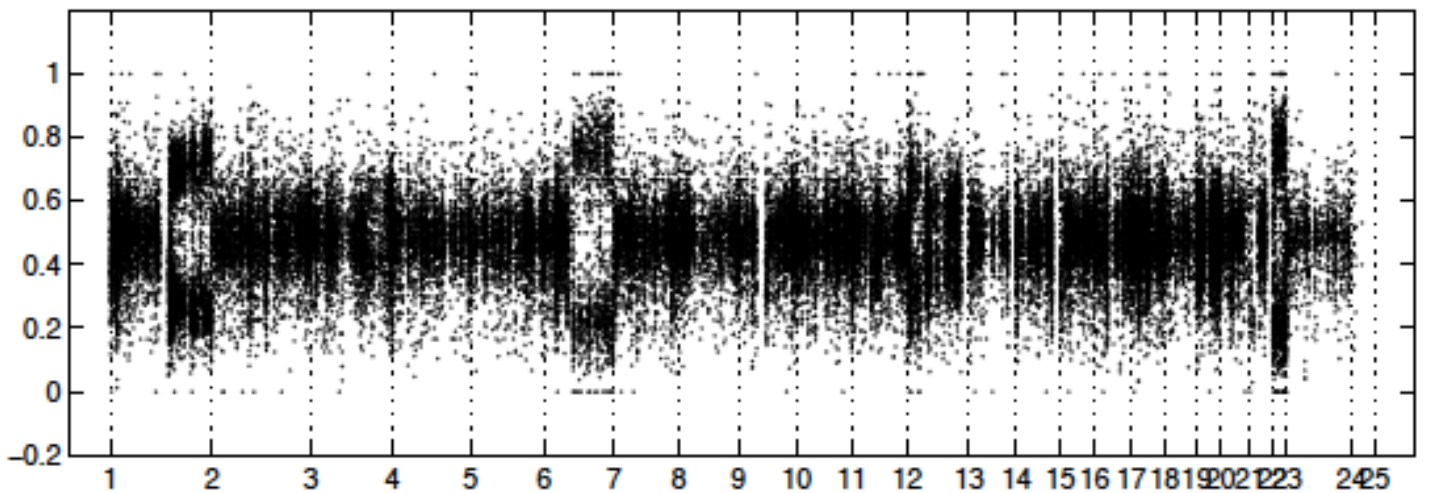

413\_ucsc.edu\_BRCA.IlluminaGA\_DNASeq.Level\_2.6.0.0\_TCGA-AO-A12A\_D  
germline-het

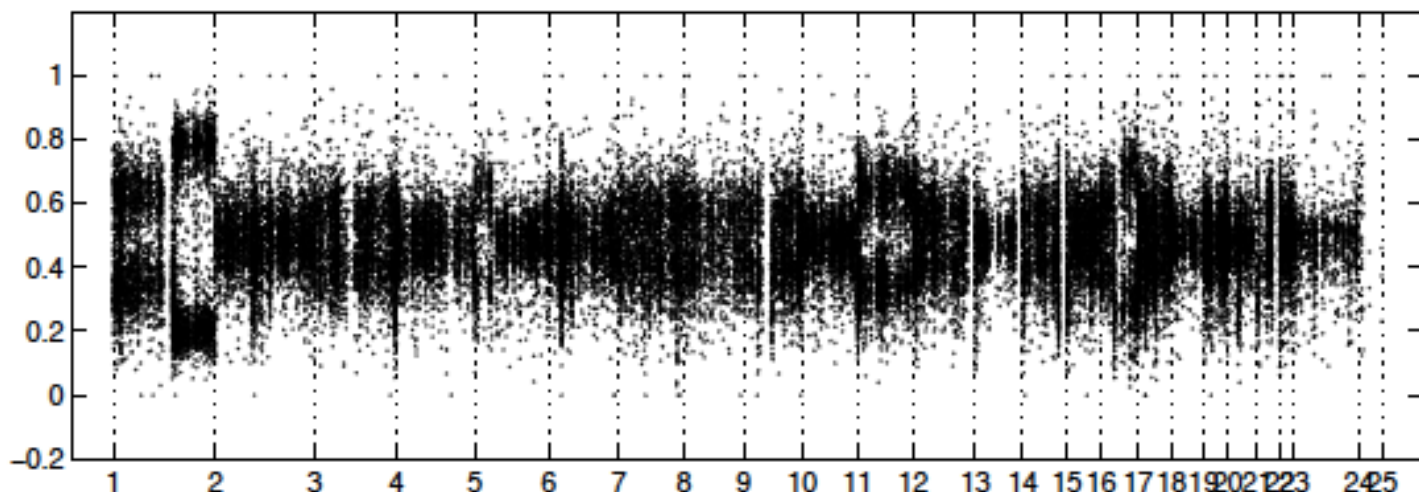

414\_ucsc.edu\_BRCA.IlluminaGA\_DNASeq.Level\_2.10.0.0\_TCGA-BH-A0HP\_D  
germline-het

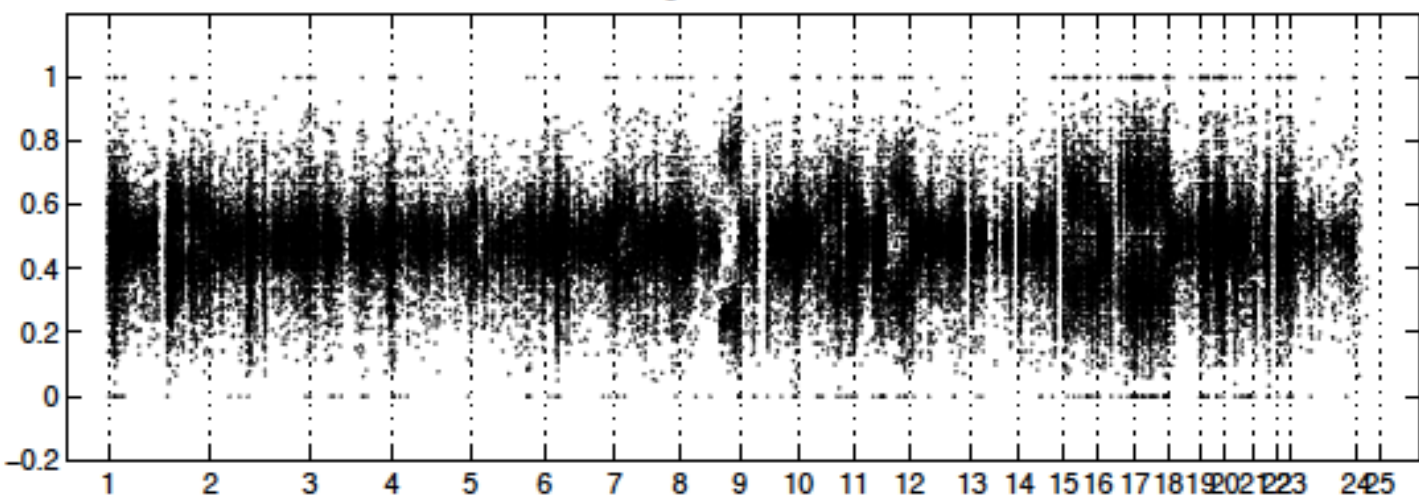

415\_ucsc.edu\_BRCA.IlluminaGA\_DNASeq.Level\_2.10.0.0\_TCGA-BH-A0C3\_D  
germline-het

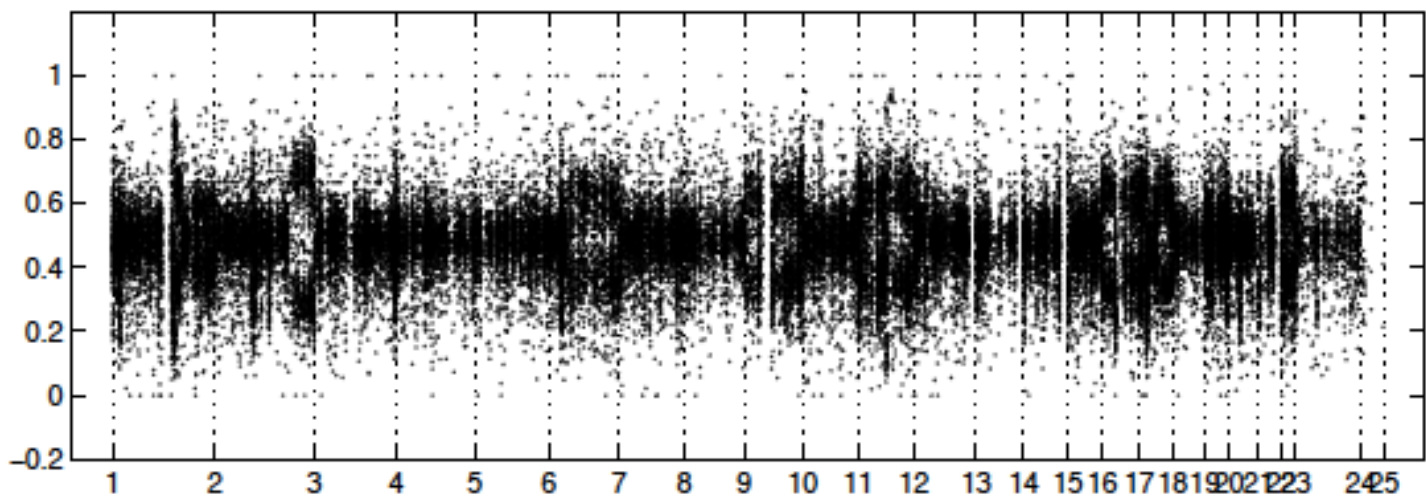

416\_ucsc.edu\_BRCA.IlluminaGA\_DNASeq.Level\_2.13.0.0\_TCGA-E2-A15P\_D  
germline-het

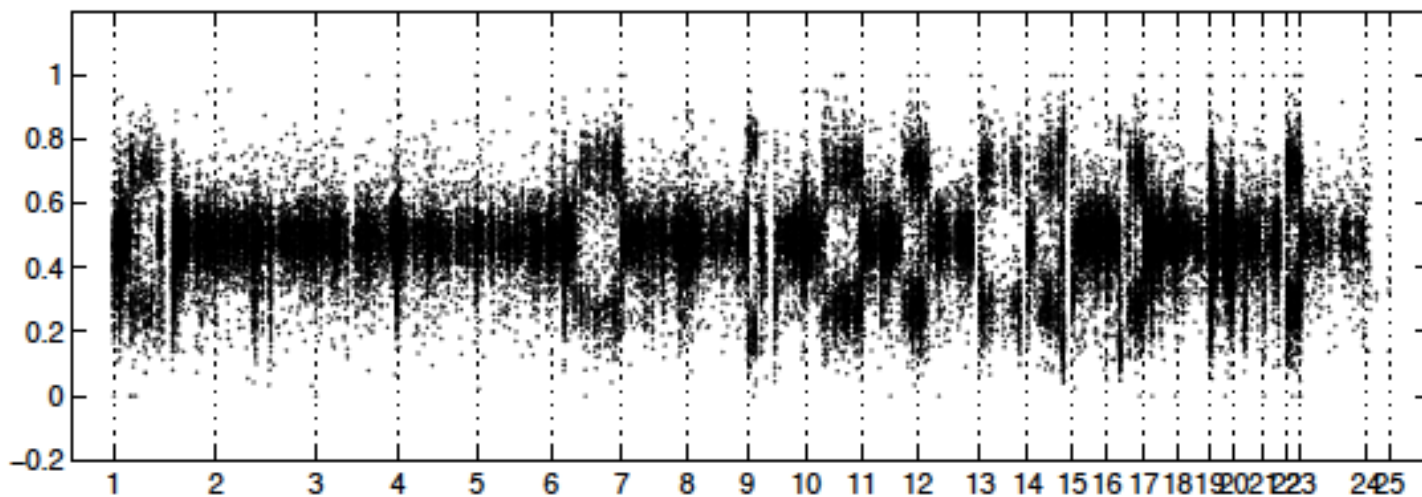

417\_ucsc.edu\_BRCA.IlluminaGA\_DNASeq.Level\_2.4.0.0\_TCGA-A8-A08H\_W  
germline-het

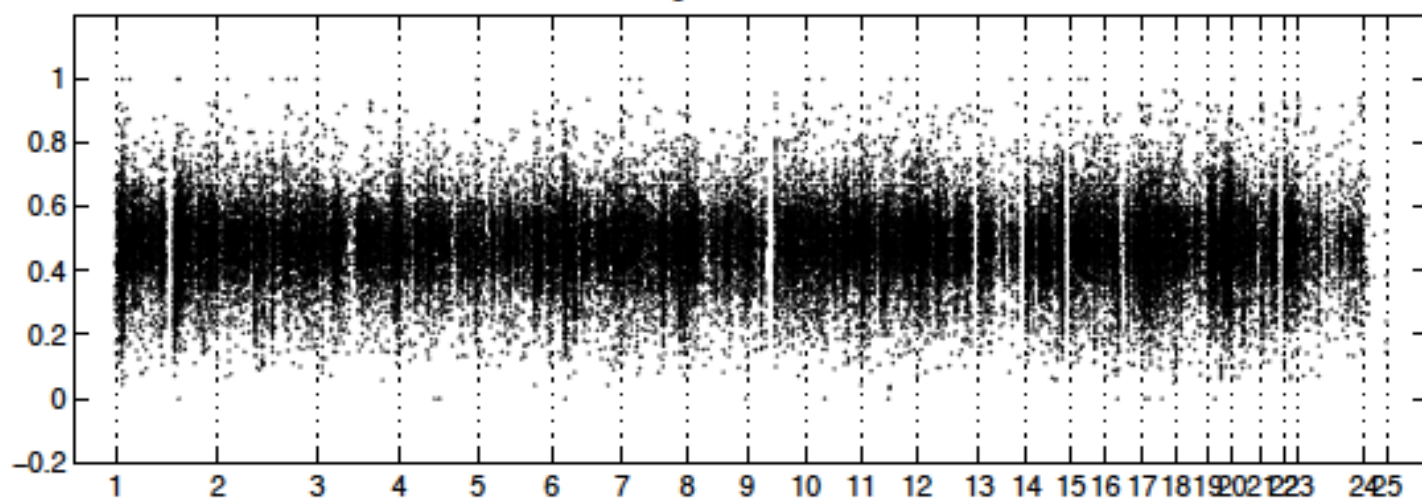

418\_ucsc.edu\_BRCA.IlluminaGA\_DNASeq.Level\_2.13.0.0\_TCGA-E2-A15C\_D  
germline-het

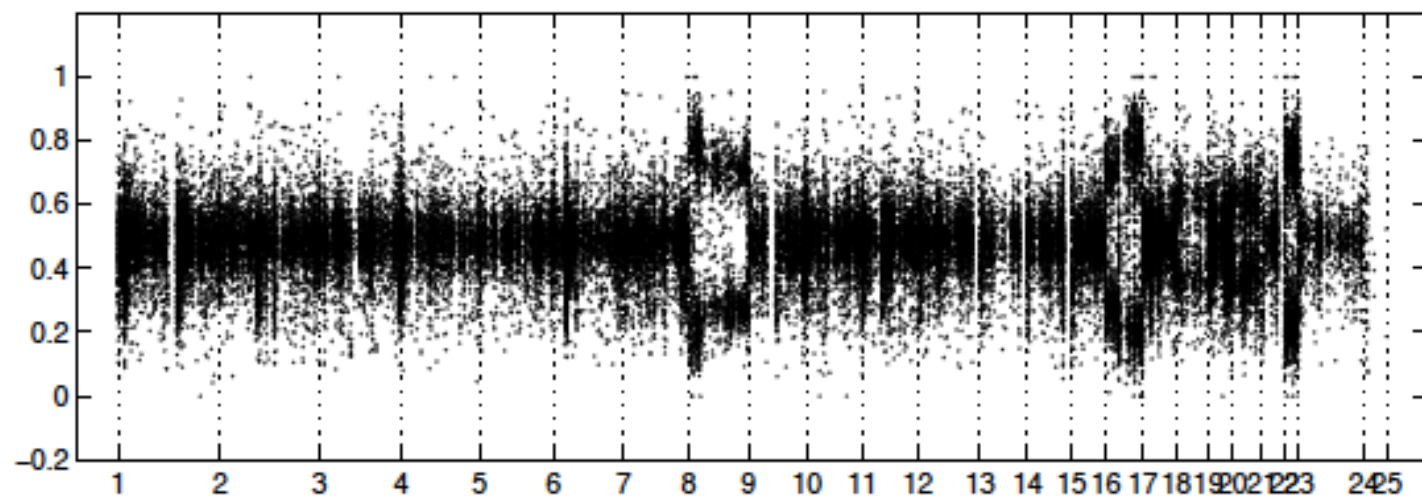

419\_ucsc.edu\_BRCA.IlluminaGA\_DNASeq.Level\_2.2.0.0\_TCGA-A2-A0CQ\_W  
germline-het

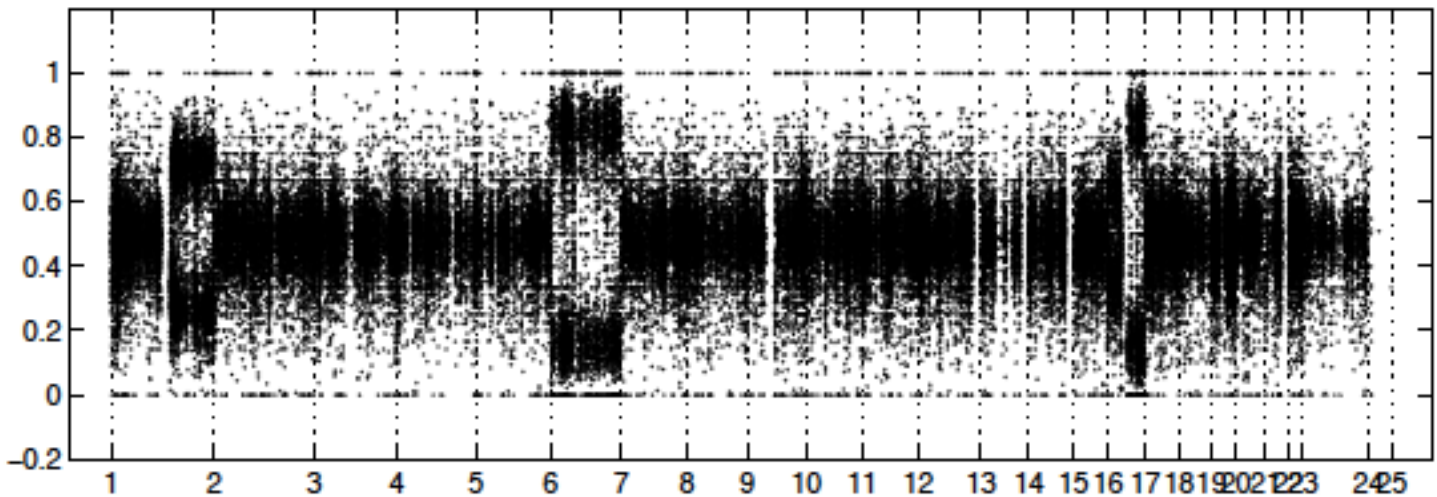

420\_ucsc.edu\_BRCA.IlluminaGA\_DNASeq.Level\_2.9.0.0\_TCGA-B6-A0RV\_D  
germline-het

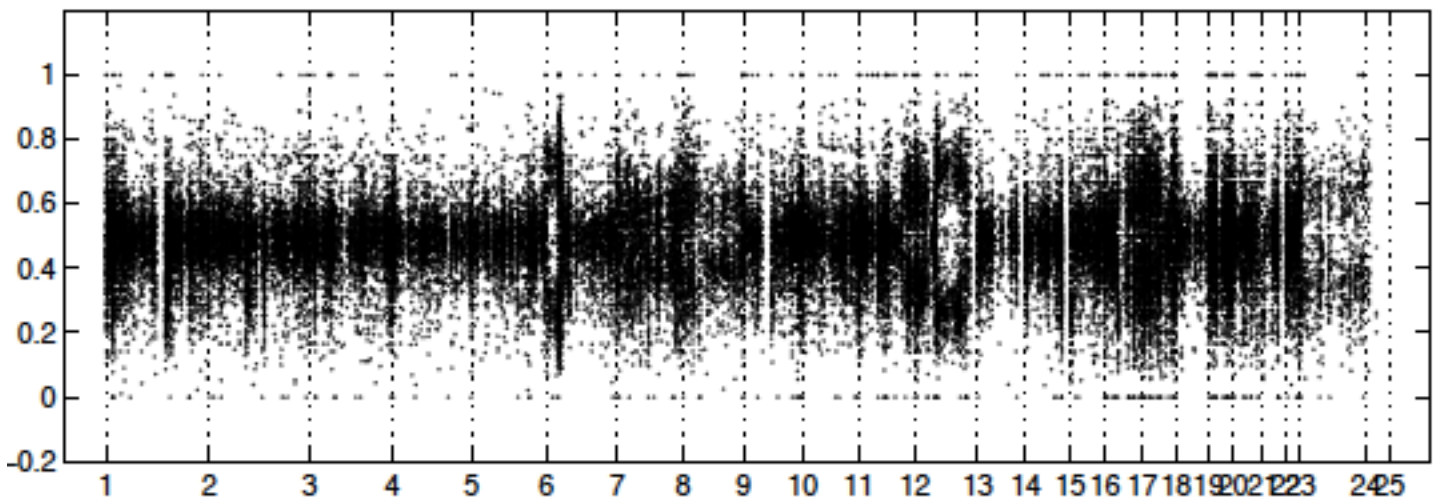

421\_ucsc.edu\_BRCA.IlluminaGA\_DNASeq.Level\_2.14.0.0\_TCGA-AO-A0J8\_W  
germline-het

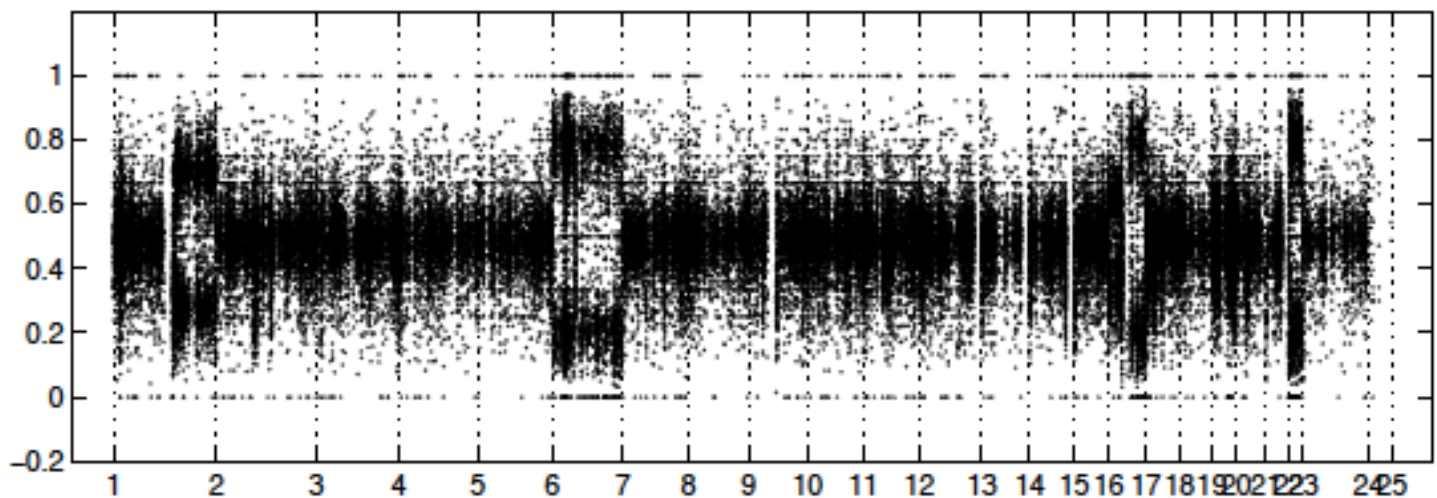

422\_ucsc.edu\_BRCA.IlluminaGA\_DNASeq.Level\_2.2.0.0\_TCGA-A2-A0ER\_W  
germline-het

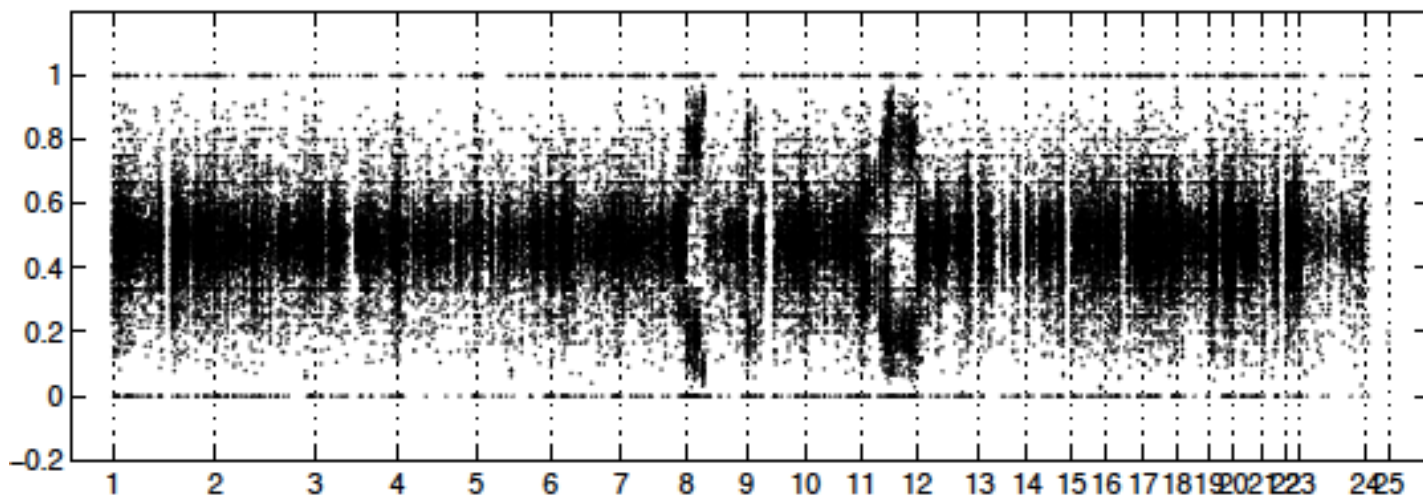

423\_ucsc.edu\_BRCA.IlluminaGA\_DNASeq.Level\_2.8.0.0\_TCGA-AR-A1AJ\_D  
germline-het

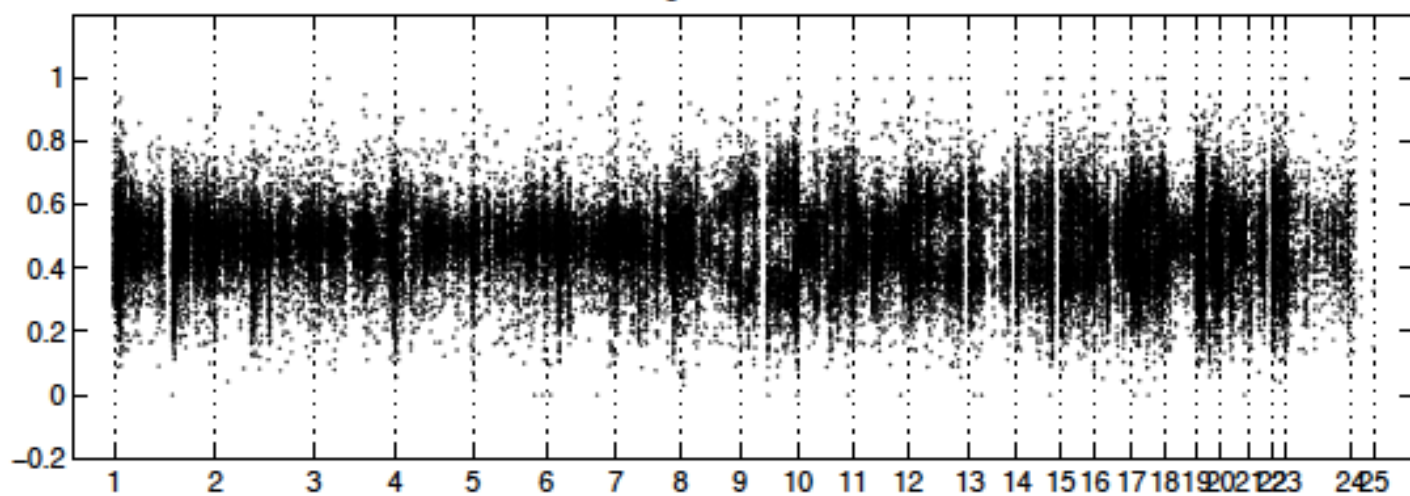

424\_ucsc.edu\_BRCA.IlluminaGA\_DNASeq.Level\_2.10.0.0\_TCGA-BH-A0HA\_D  
germline-het

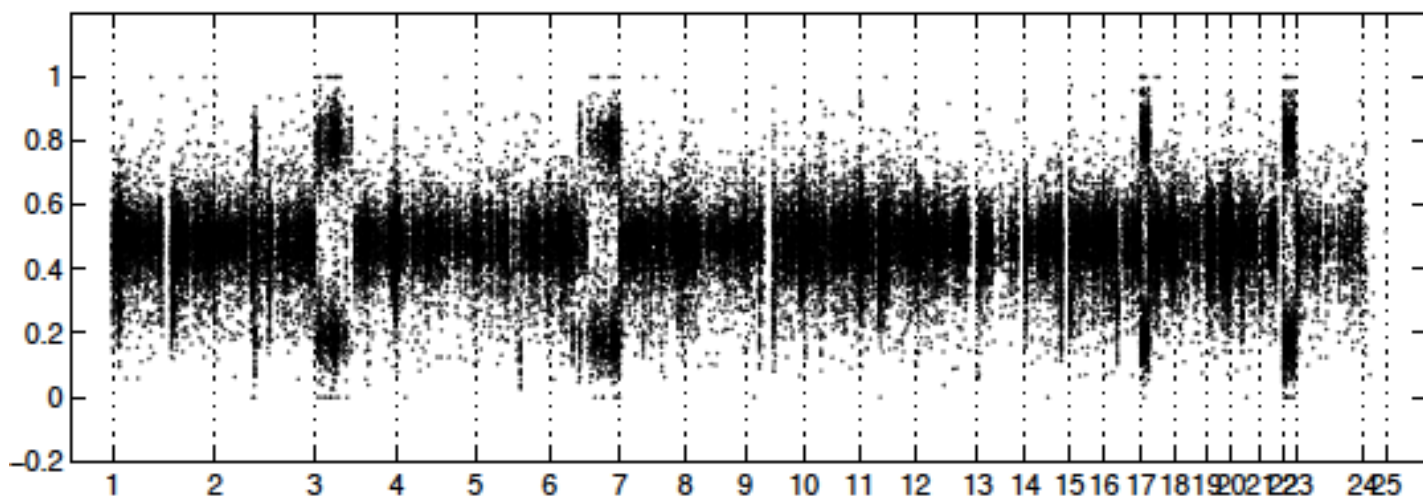

425\_ucsc.edu\_BRCA.IlluminaGA\_DNASeq.Level\_2.9.0.0\_TCGA-B6-A0IM\_W  
germline-het

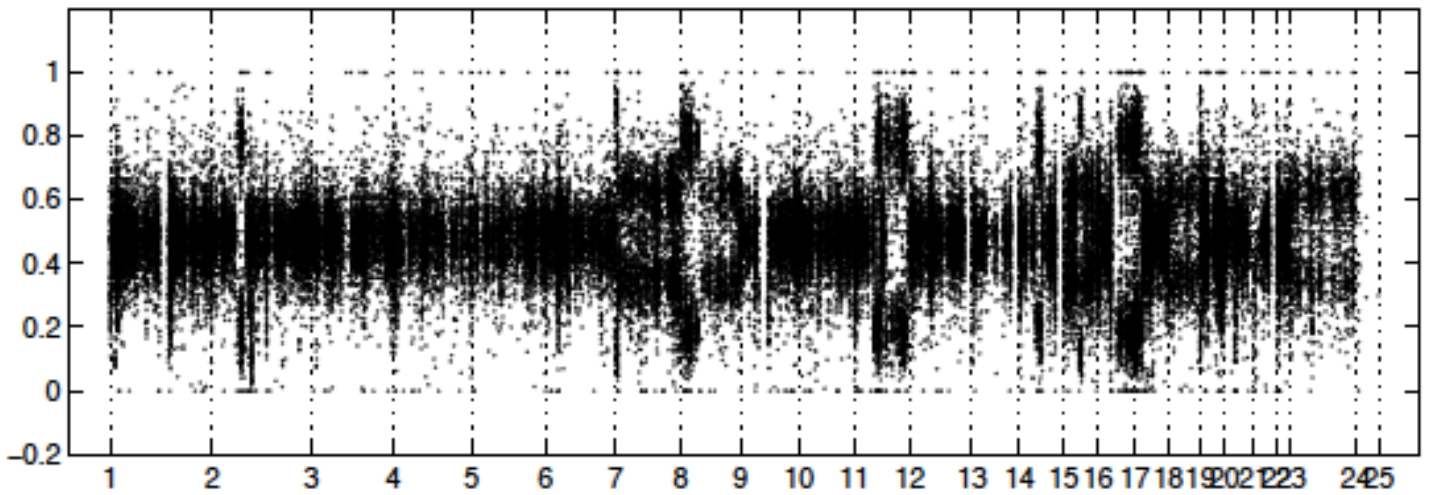

426\_ucsc.edu\_BRCA.IlluminaGA\_DNASeq.Level\_2.10.0.0\_TCGA-BH-A0BF\_D  
germline-het

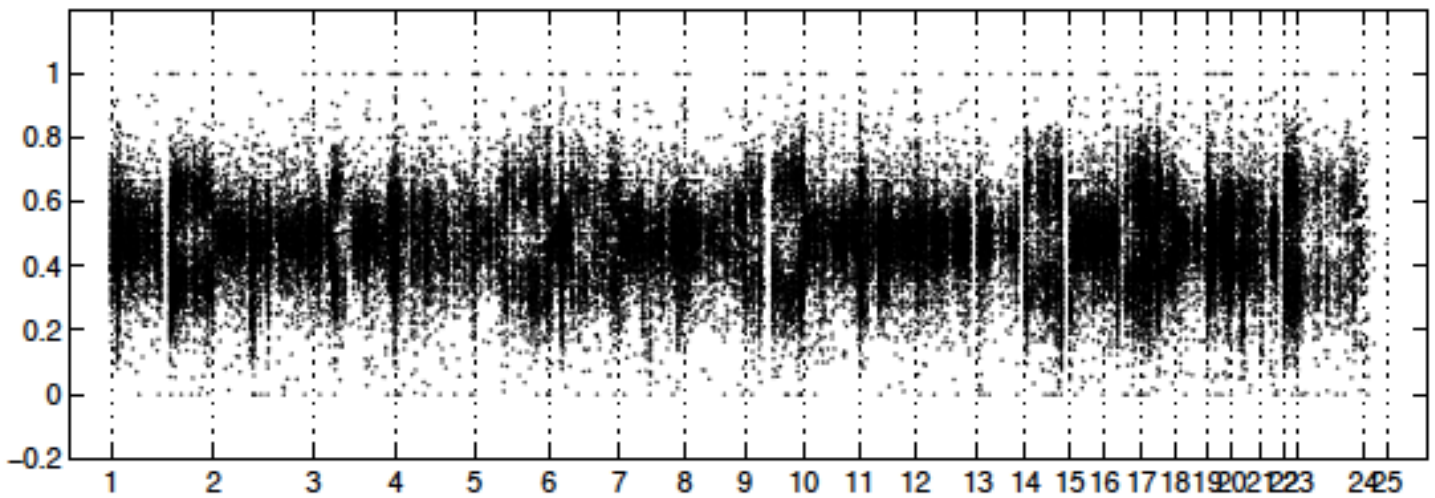

427\_ucsc.edu\_BRCA.IlluminaGA\_DNASeq.Level\_2.10.0.0\_TCGA-BH-A0BO\_D  
germline-het

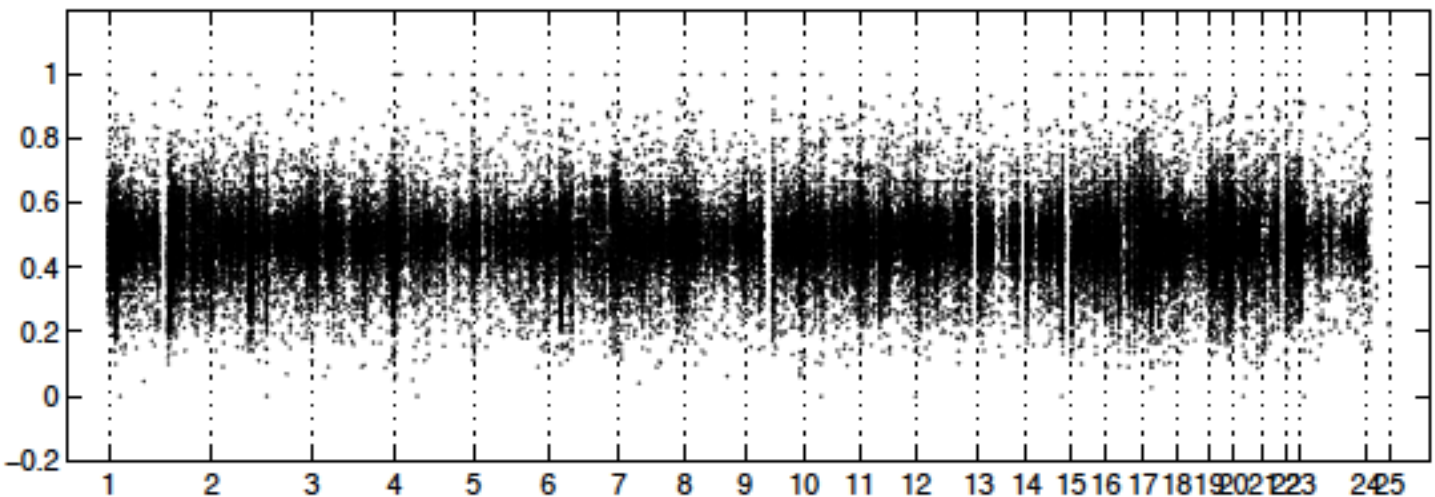



428\_ucsc.edu\_BRCA.IlluminaGA\_DNASeq.Level\_2.2.0.0\_TCGA-A2-A0YI\_D  
germline-het

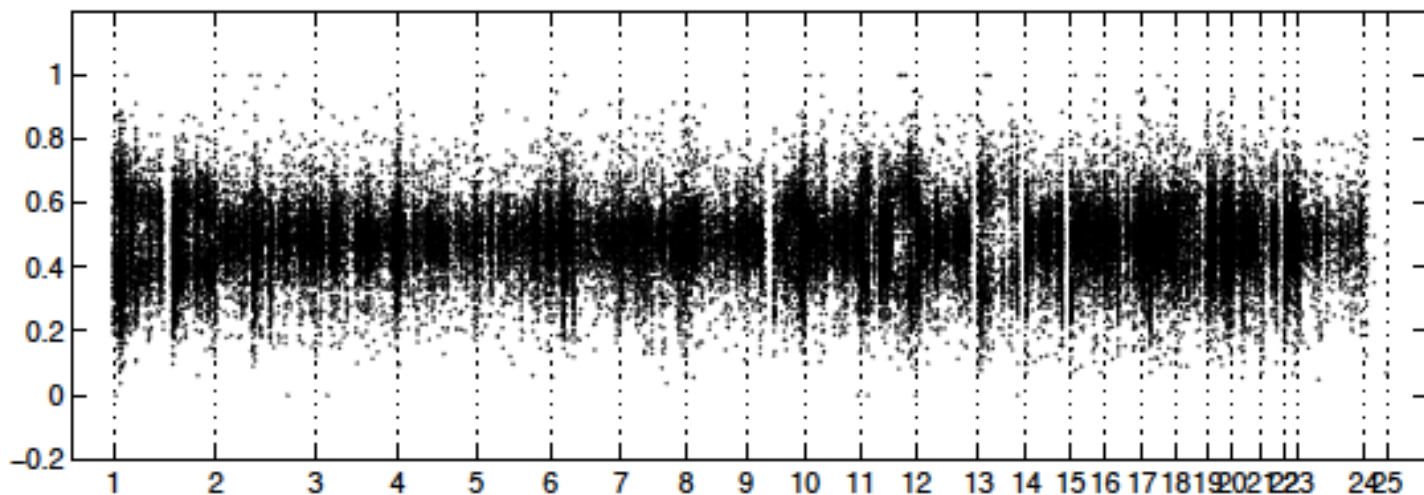

429\_ucsc.edu\_BRCA.IlluminaGA\_DNASeq.Level\_2.9.0.0\_TCGA-B6-A0IH\_D  
germline-het

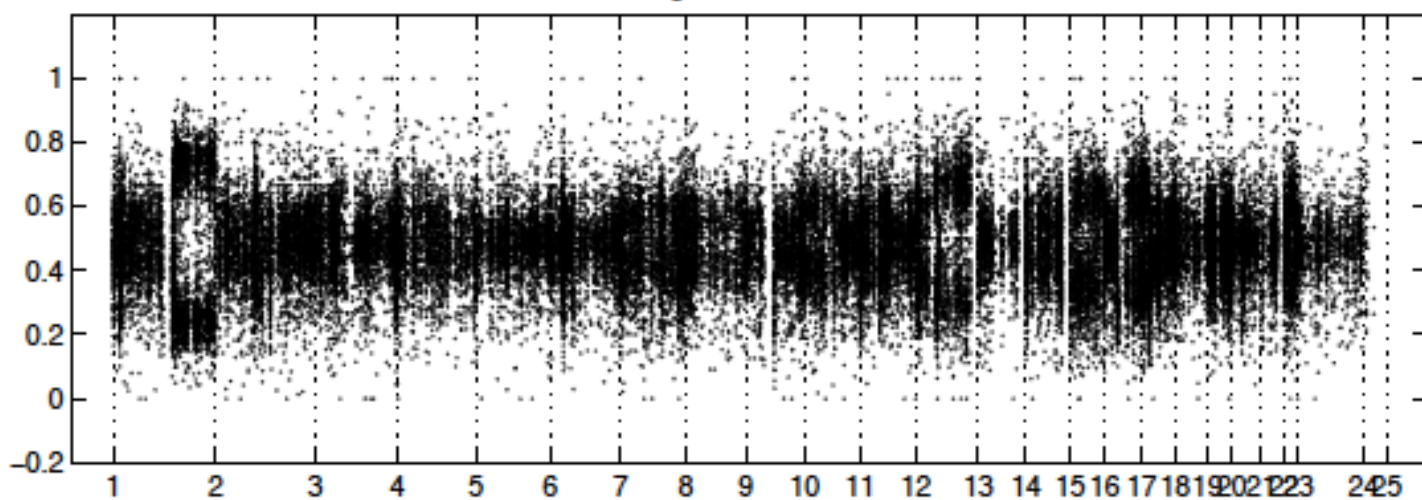

430\_ucsc.edu\_BRCA.IlluminaGA\_DNASeq.Level\_2.10.0.0\_TCGA-BH-A1EU\_D  
germline-het

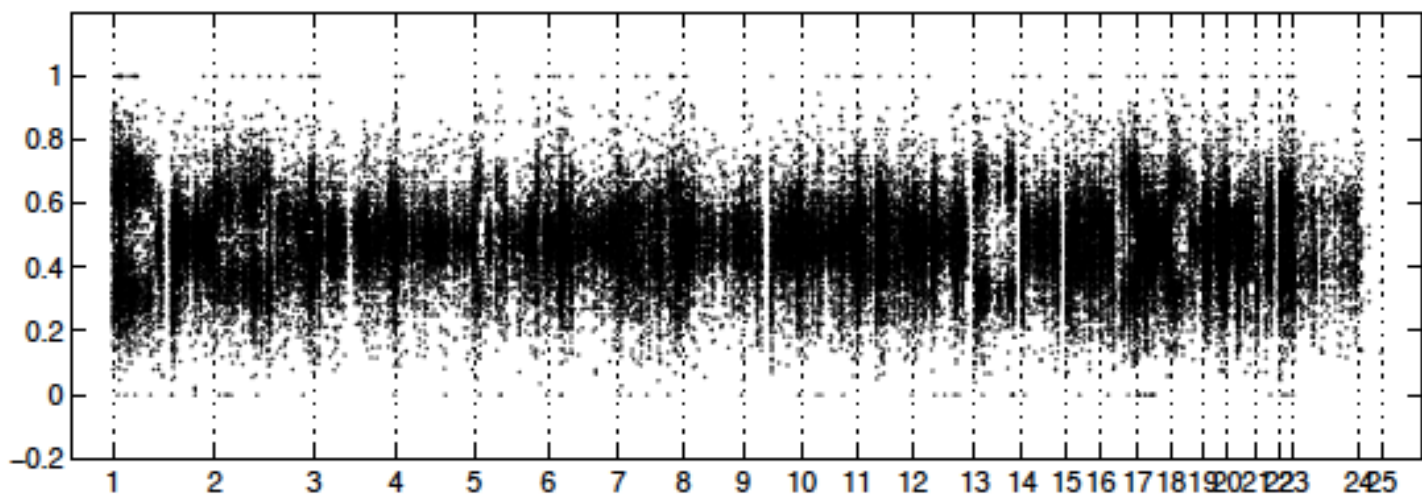

431\_ucsc.edu\_BRCA.IlluminaGA\_DNASeq.Level\_2.8.0.0\_TCGA-AR-A0TS\_D  
germline-het

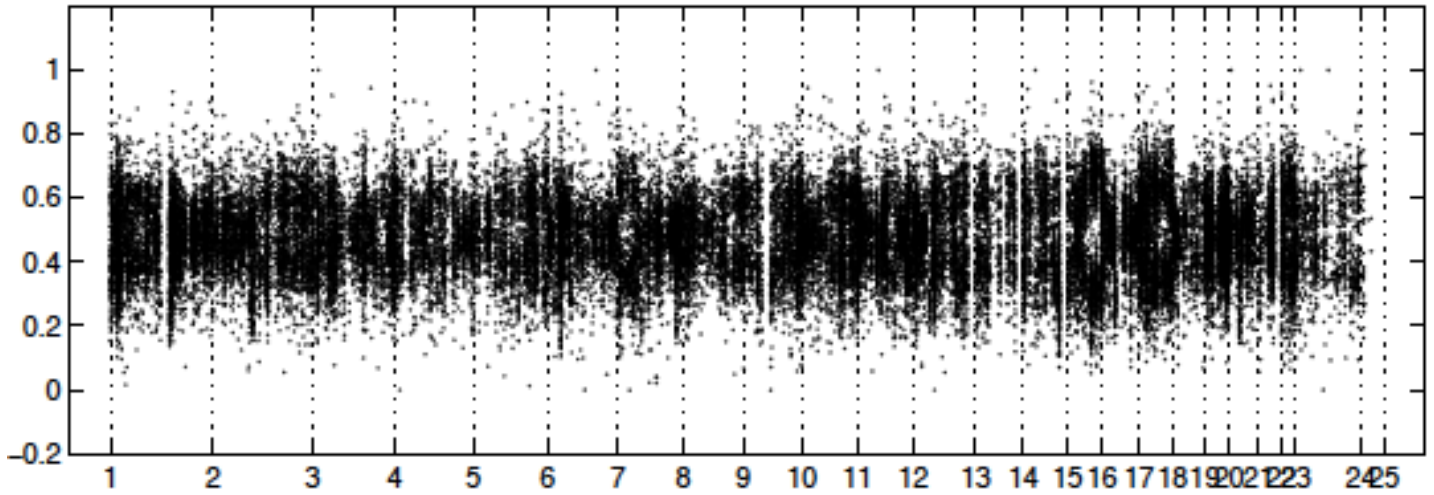

432\_ucsc.edu\_BRCA.IlluminaGA\_DNASeq.Level\_2.10.0.0\_TCGA-BH-A0DQ\_D  
germline-het

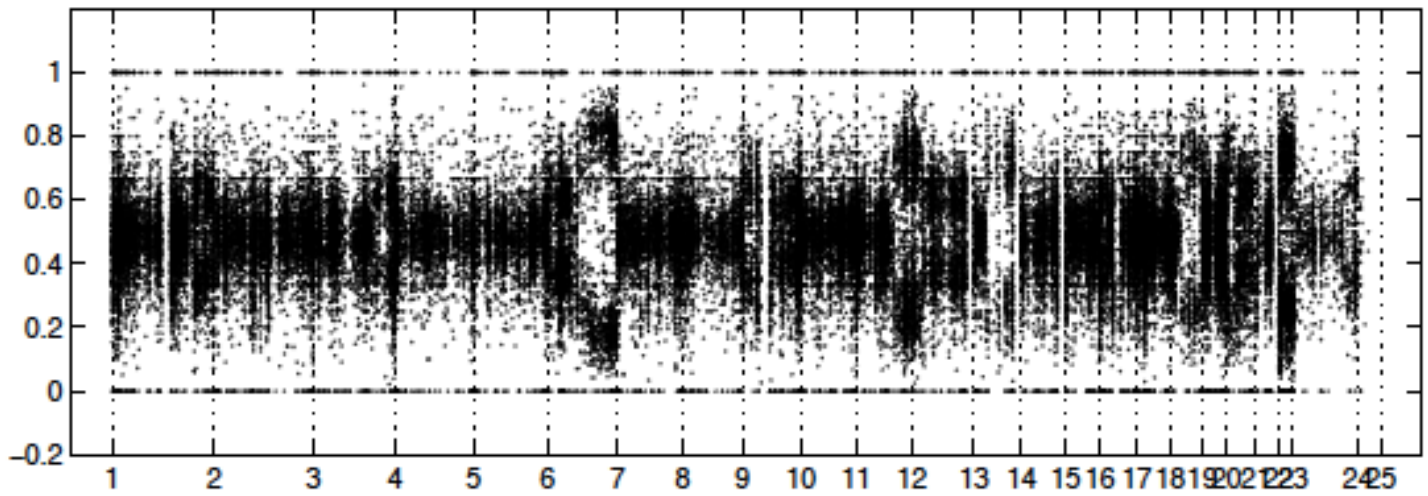

433\_ucsc.edu\_BRCA.IlluminaGA\_DNASeq.Level\_2.10.0.0\_TCGA-BH-A0W7\_D  
germline-het

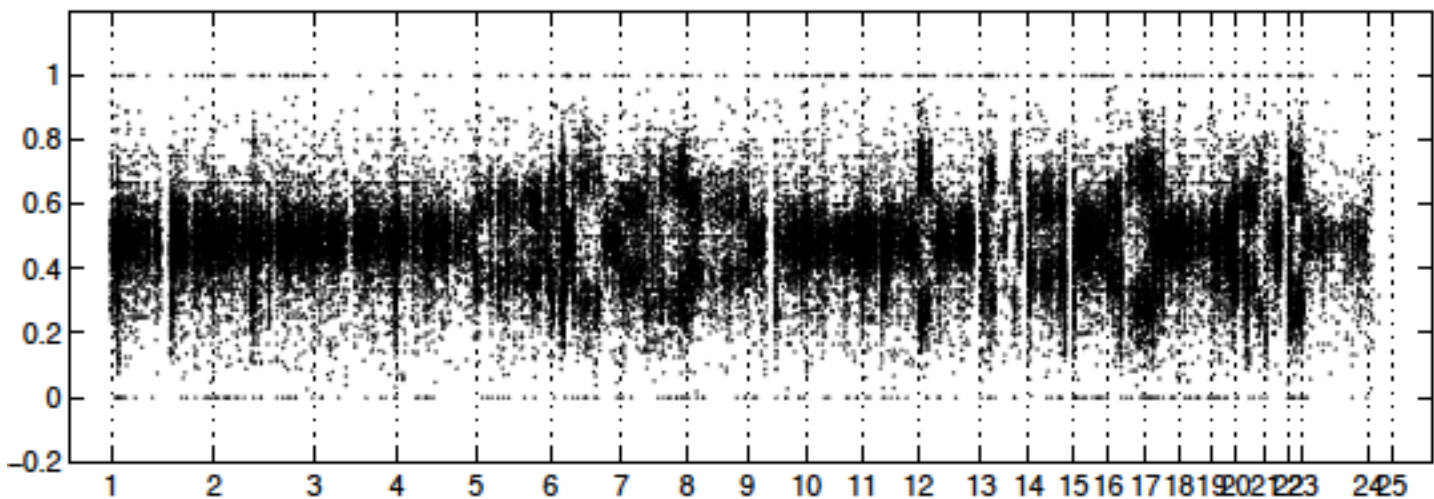

434\_ucsc.edu\_BRCA.IlluminaGA\_DNASeq.Level\_2.10.0.0\_TCGA-BH-A18G\_D  
germline-het

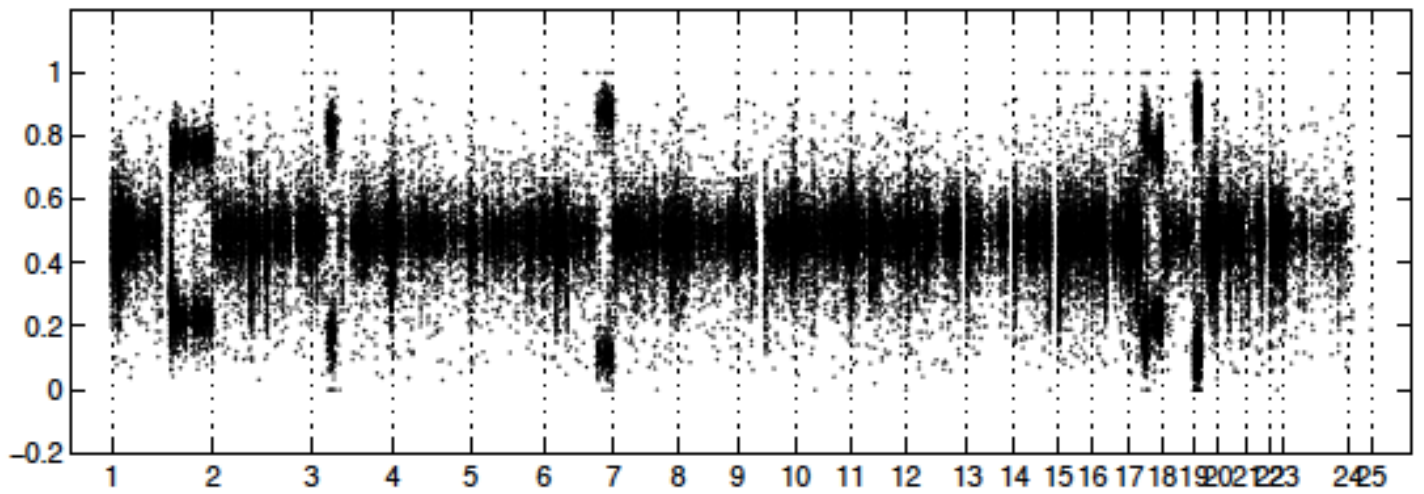

435\_ucsc.edu\_BRCA.IlluminaGA\_DNASeq.Level\_2.6.0.0\_TCGA-AO-A12D\_D  
germline-het

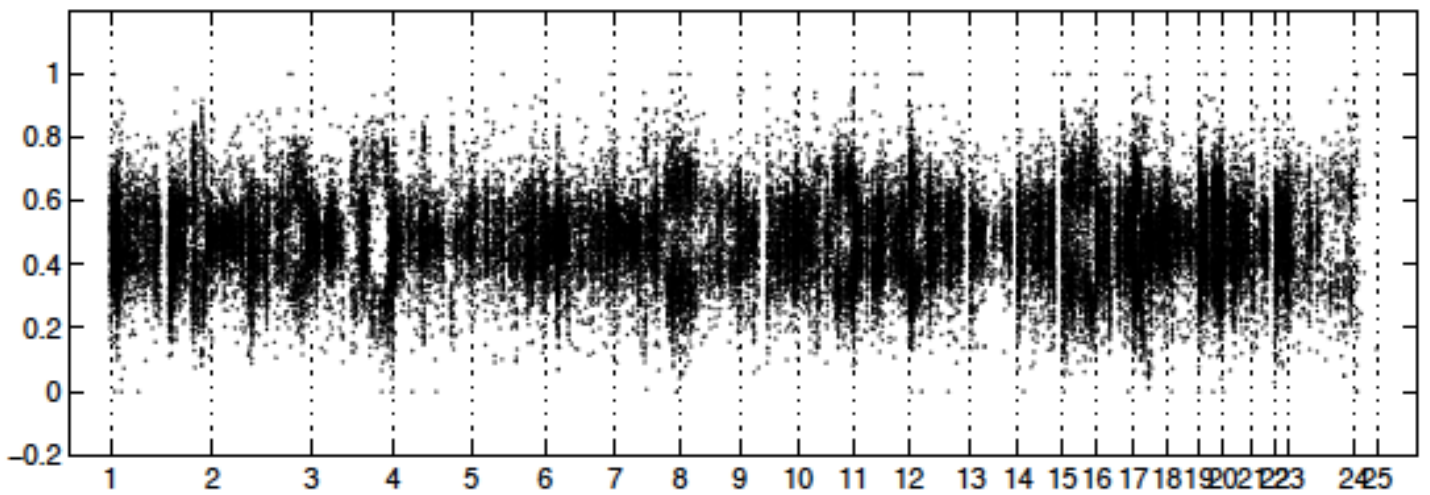

436\_ucsc.edu\_BRCA.IlluminaGA\_DNASeq.Level\_2.10.0.0\_TCGA-BH-A0E1\_W  
germline-het

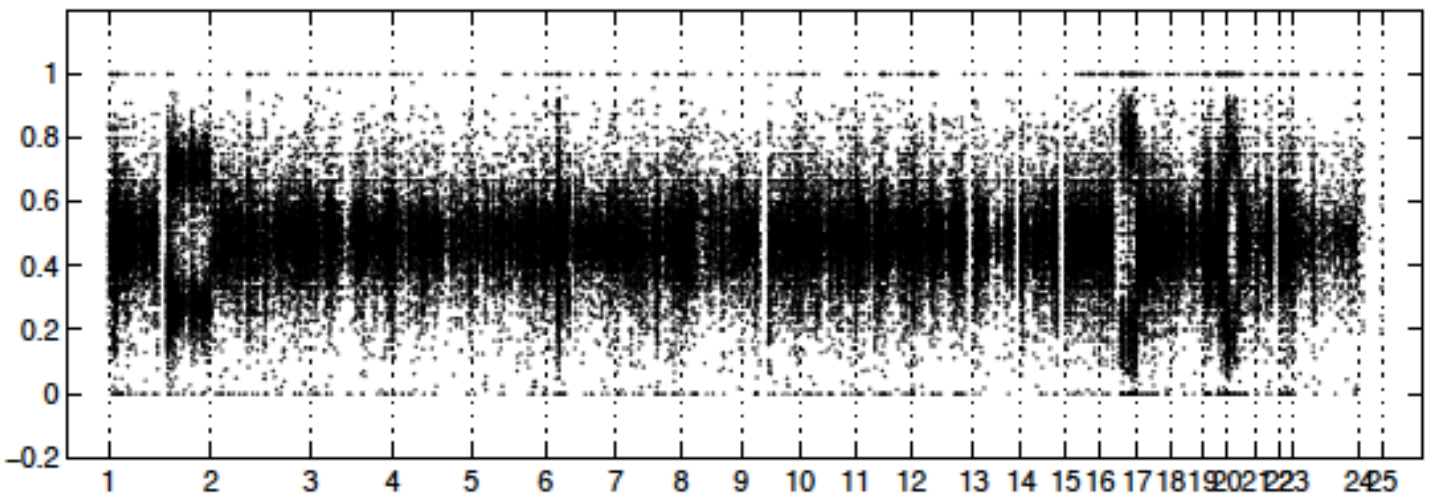

437\_ucsc.edu\_BRCA.IlluminaGA\_DNASeq.Level\_2.2.0.0\_TCGA-A2-A0T4\_D  
germline-het

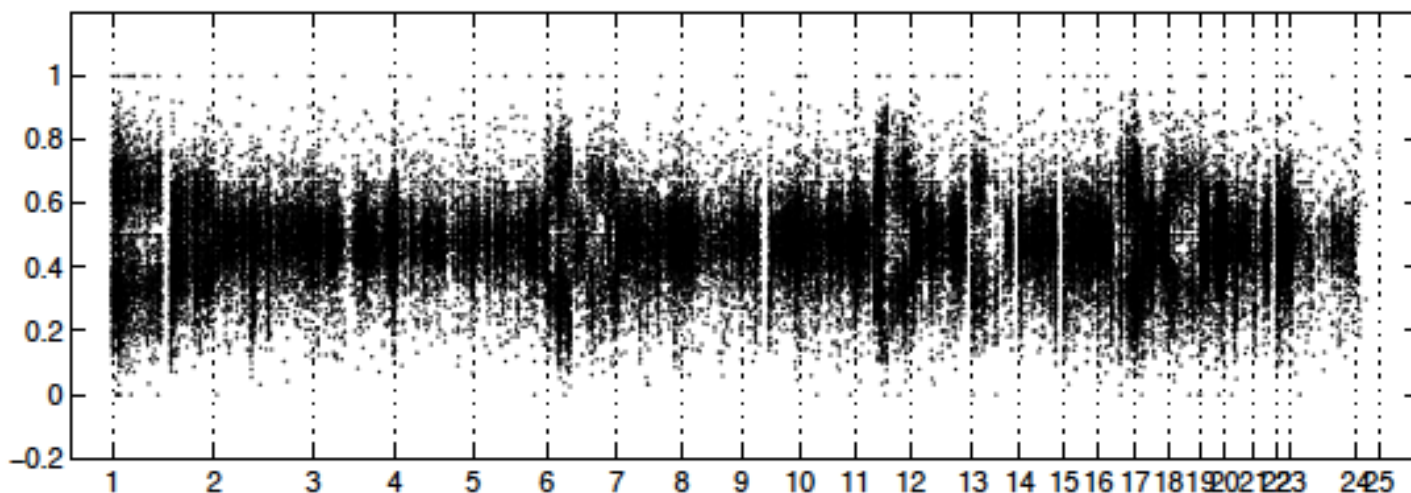

438\_ucsc.edu\_BRCA.IlluminaGA\_DNASeq.Level\_2.5.0.0\_TCGA-AN-A0FN\_W  
germline-het

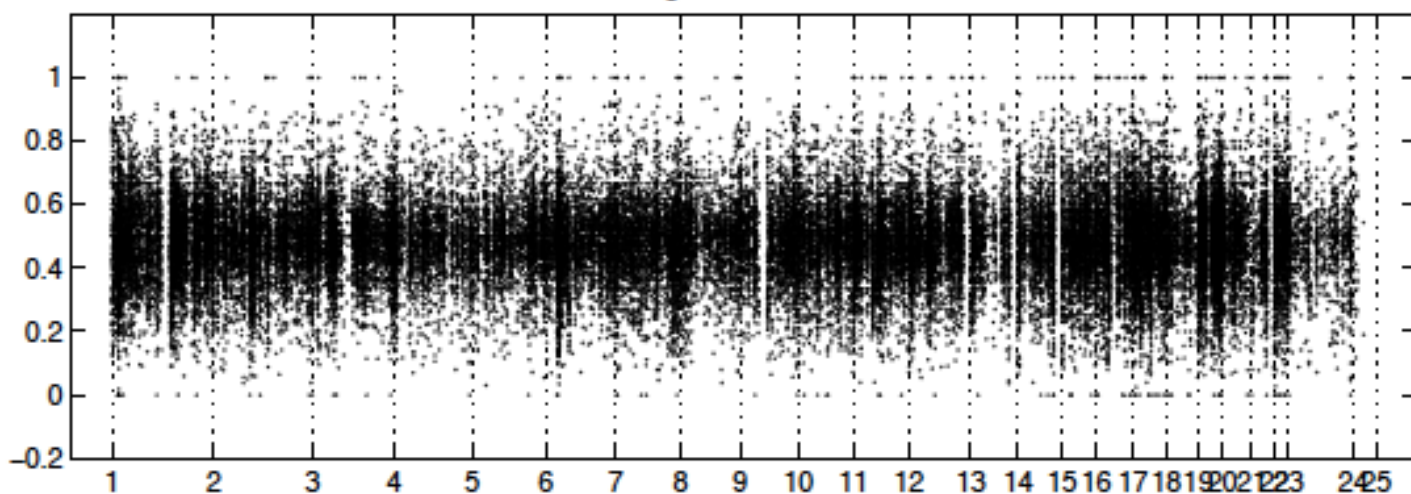

439\_ucsc.edu\_BRCA.IlluminaGA\_DNASeq.Level\_2.2.0.0\_TCGA-A2-A0EX\_W  
germline-het

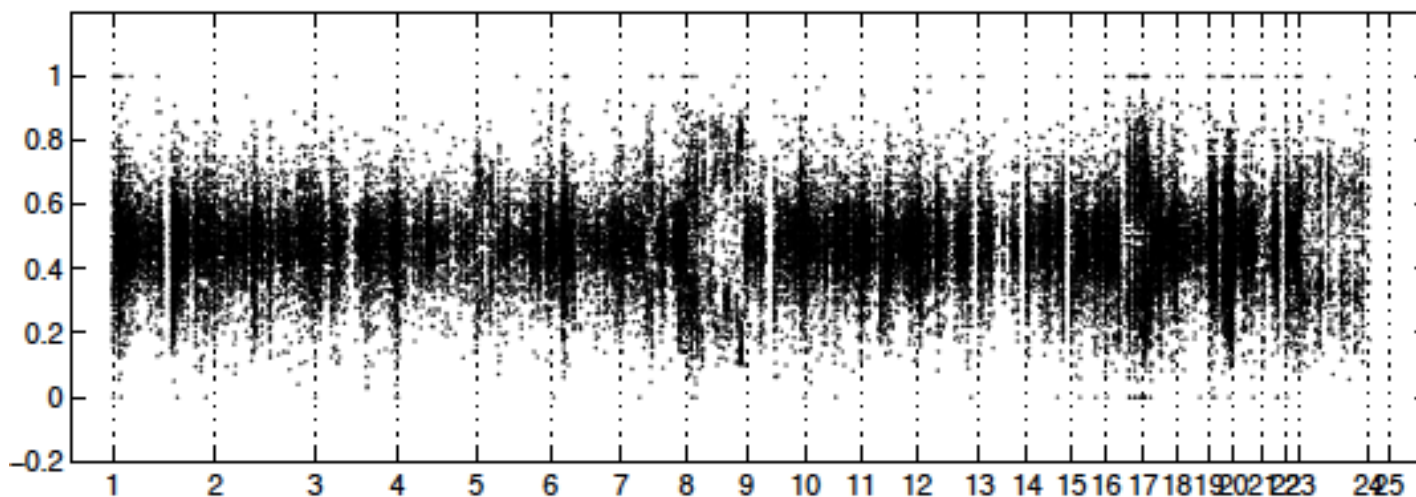

440\_ucsc.edu\_BRCA.IlluminaGA\_DNASeq.Level\_2.10.0.0\_TCGA-BH-A18H\_D  
germline-het

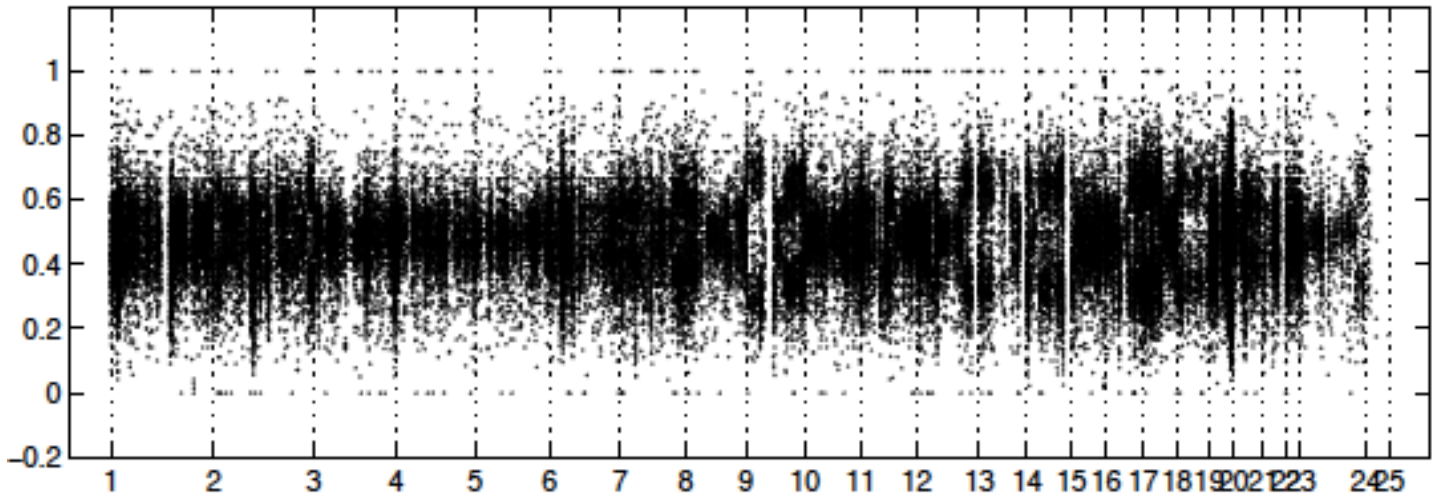

441\_ucsc.edu\_BRCA.IlluminaGA\_DNASeq.Level\_2.6.0.0\_TCGA-AO-A0JC\_W  
germline-het

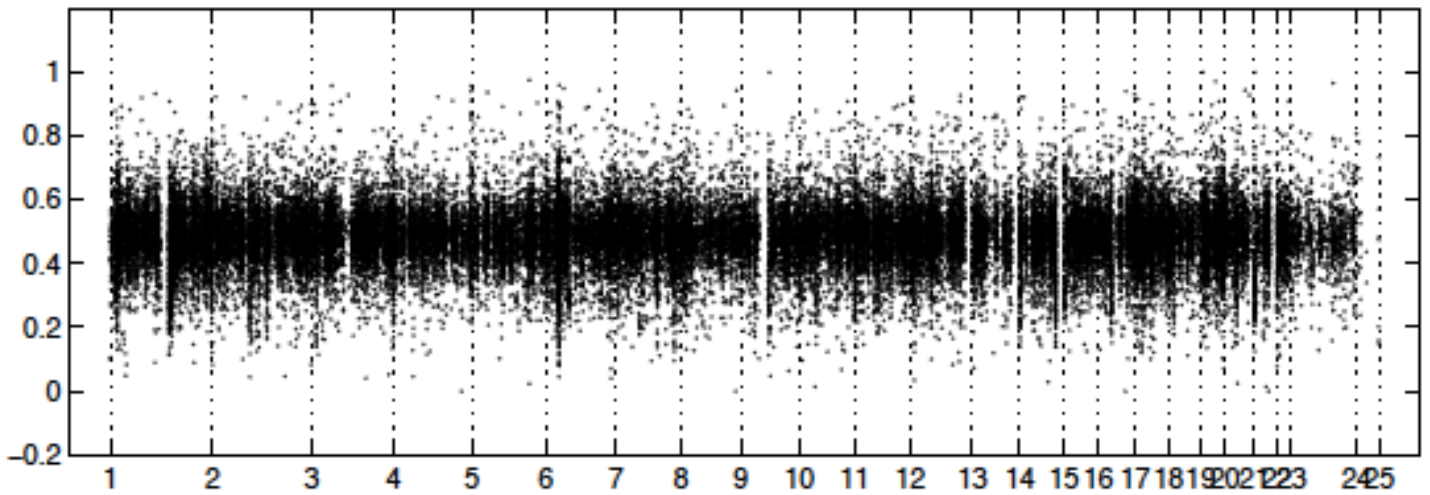

442\_ucsc.edu\_BRCA.IlluminaGA\_DNASeq.Level\_2.10.0.0\_TCGA-BH-A0E7\_W  
germline-het

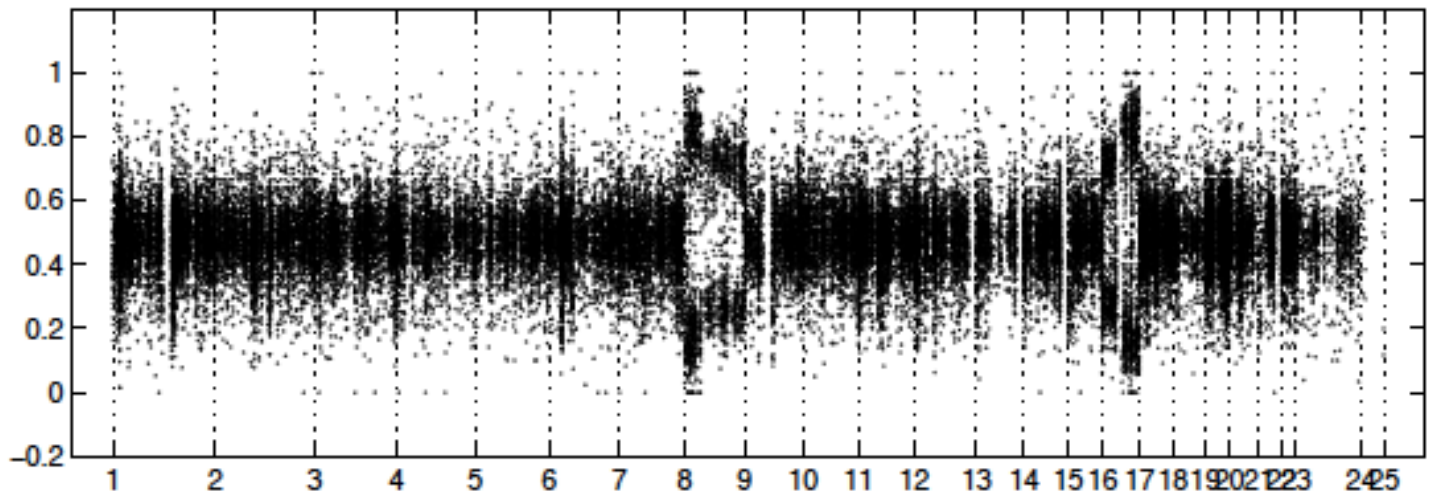

443\_ucsc.edu\_BRCA.IlluminaGA\_DNASeq.Level\_2.11.0.0\_TCGA-C8-A132\_D  
germline-het

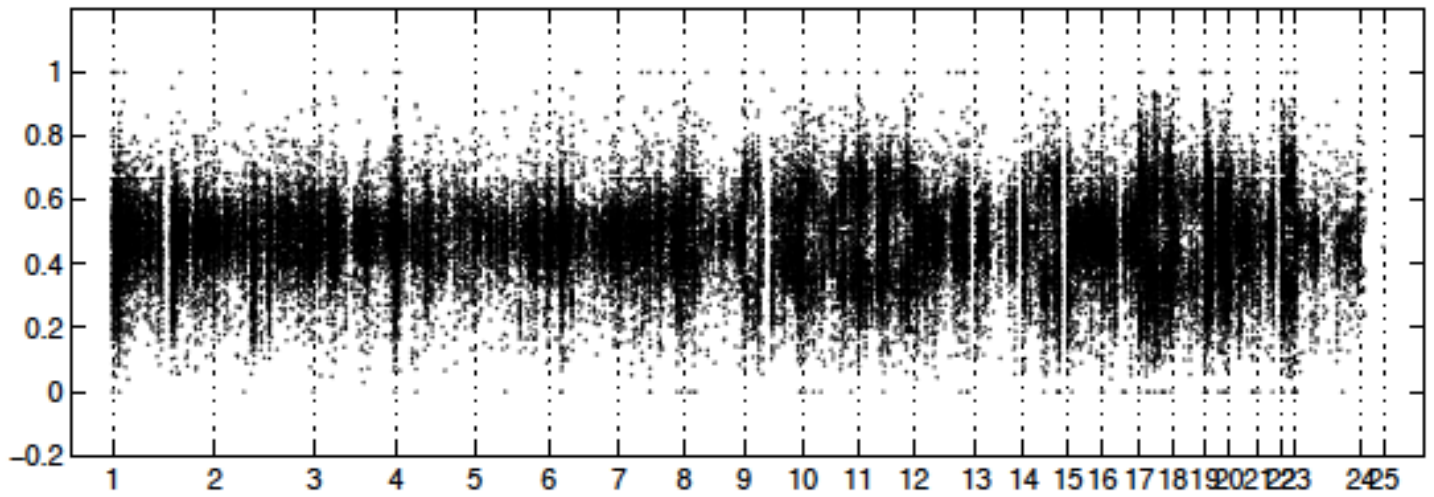

444\_ucsc.edu\_BRCA.IlluminaGA\_DNASeq.Level\_2.10.0.0\_TCGA-BH-A0DI\_D  
germline-het

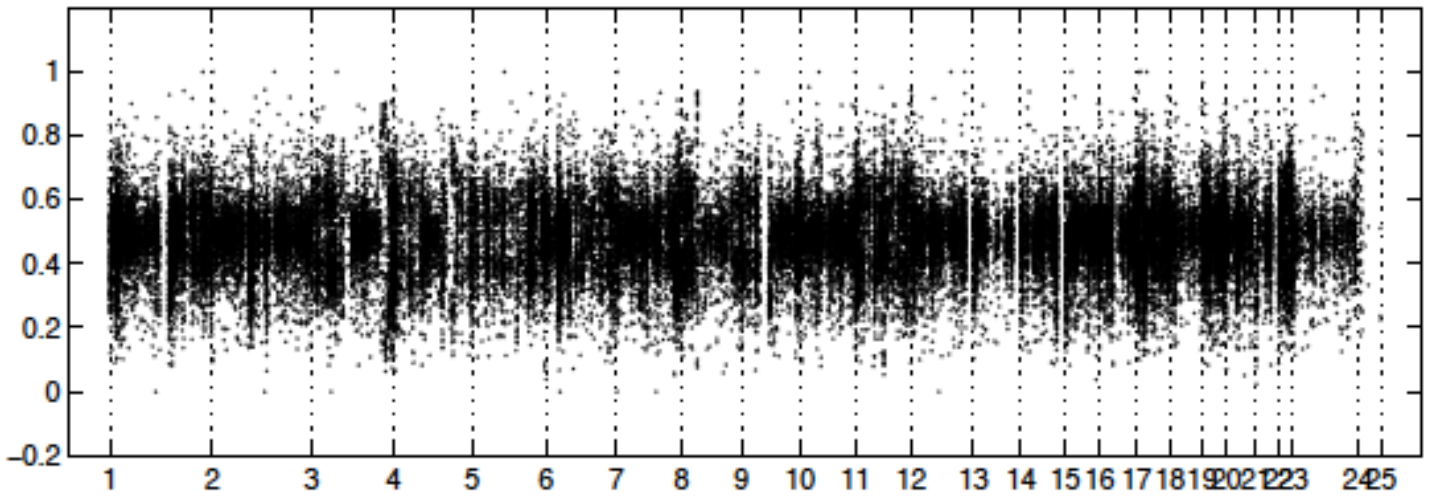

445\_ucsc.edu\_BRCA.IlluminaGA\_DNASeq.Level\_2.5.0.0\_TCGA-AN-A0XP\_D  
germline-het

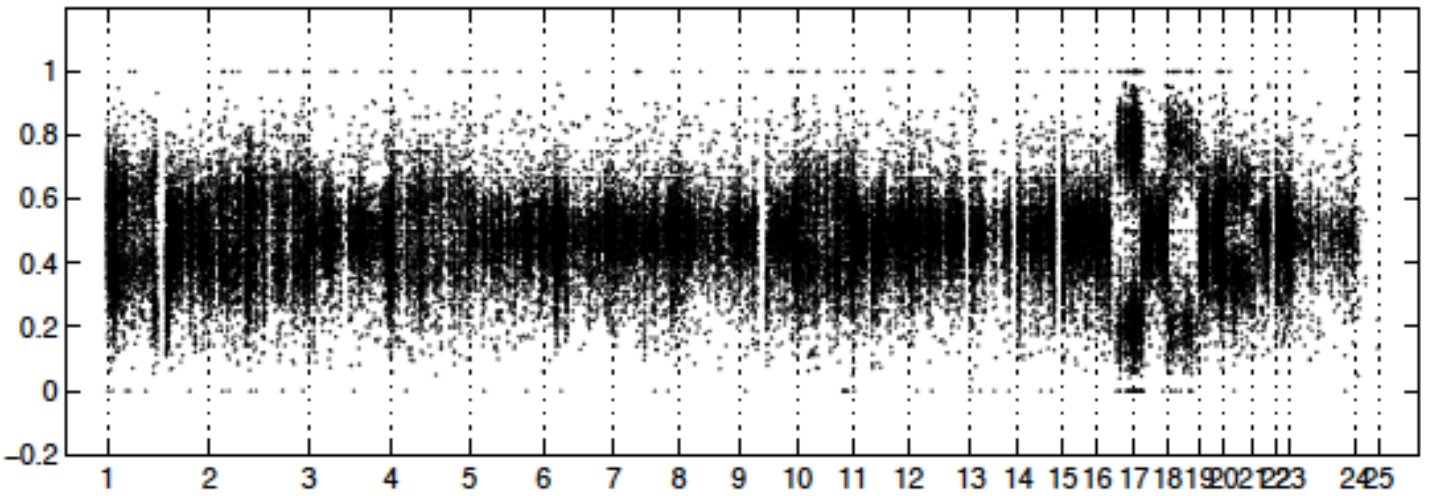

446\_ucsc.edu\_BRCA.IlluminaGA\_DNASeq.Level\_2.9.0.0\_TCGA-B6-A0WS\_D  
germline-het

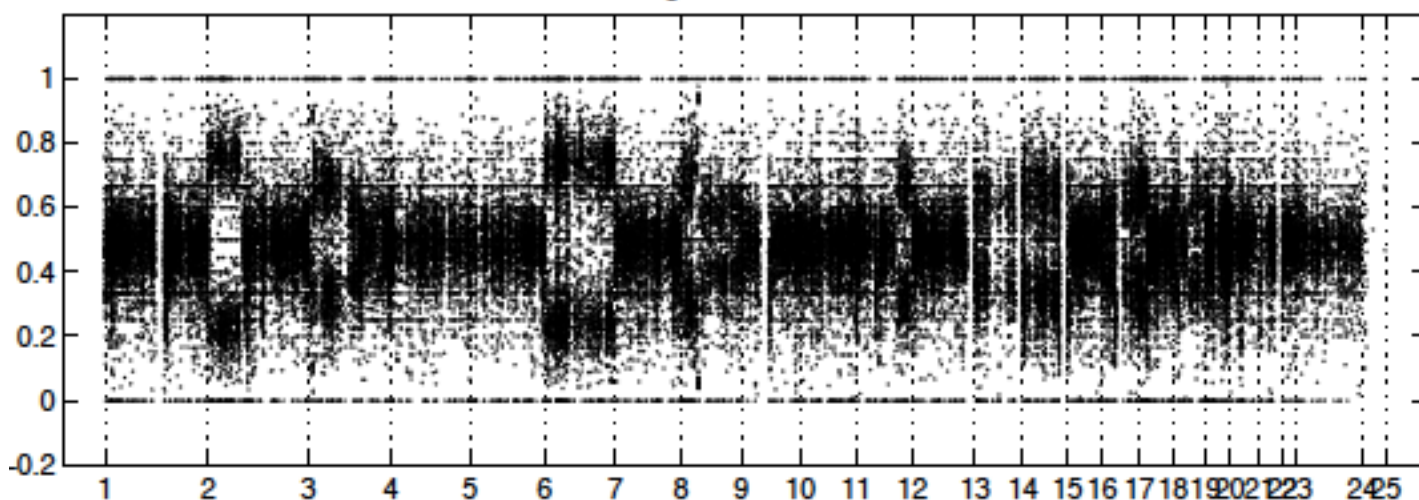

447\_ucsc.edu\_BRCA.IlluminaGA\_DNASeq.Level\_2.2.0.0\_TCGA-A2-A0YC\_D  
germline-het

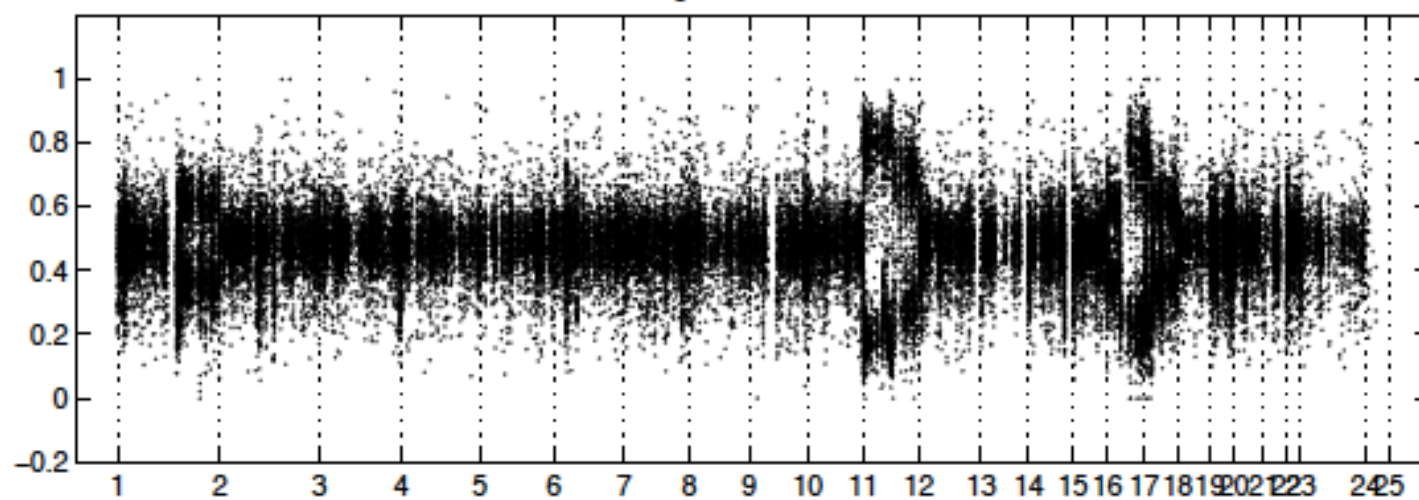

448\_ucsc.edu\_BRCA.IlluminaGA\_DNASeq.Level\_2.8.0.0\_TCGA-AR-A0TQ\_D  
germline-het

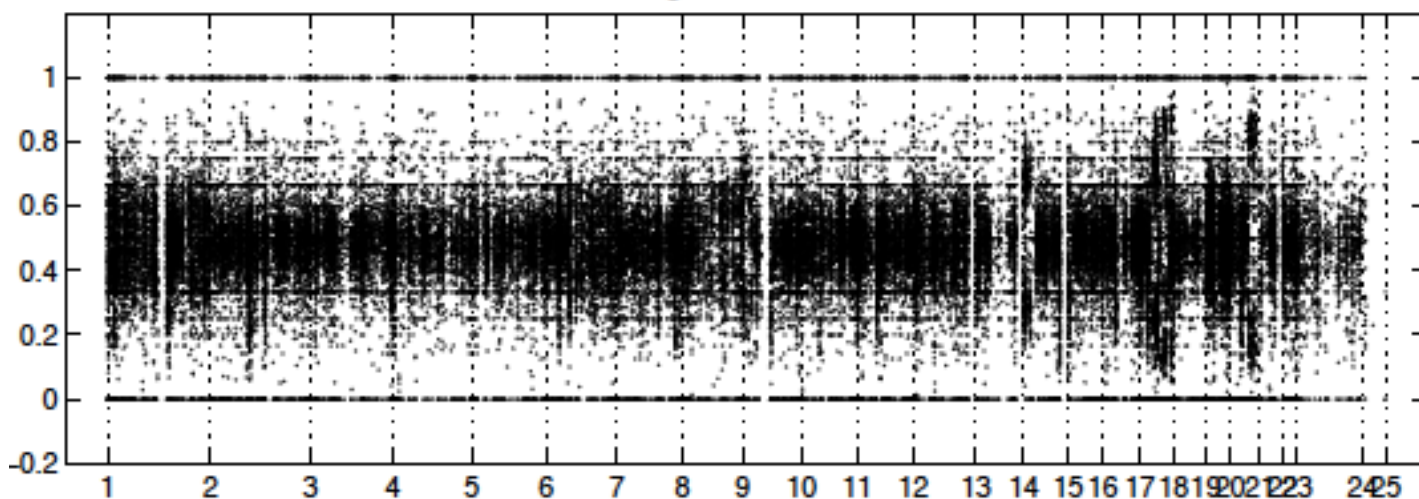

449\_ucsc.edu\_BRCA.IlluminaGA\_DNASeq.Level\_2.10.0.0\_TCGA-BH-A0EB\_W  
germline-het

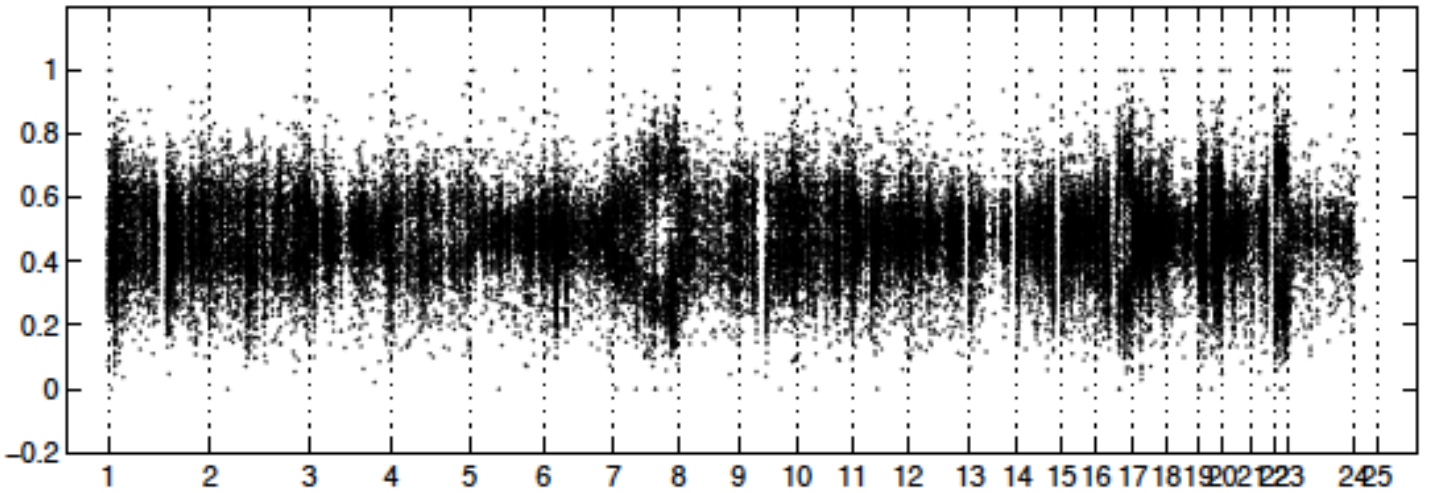

450\_ucsc.edu\_BRCA.IlluminaGA\_DNASeq.Level\_2.6.0.0\_TCGA-AO-A0JF\_W  
germline-het

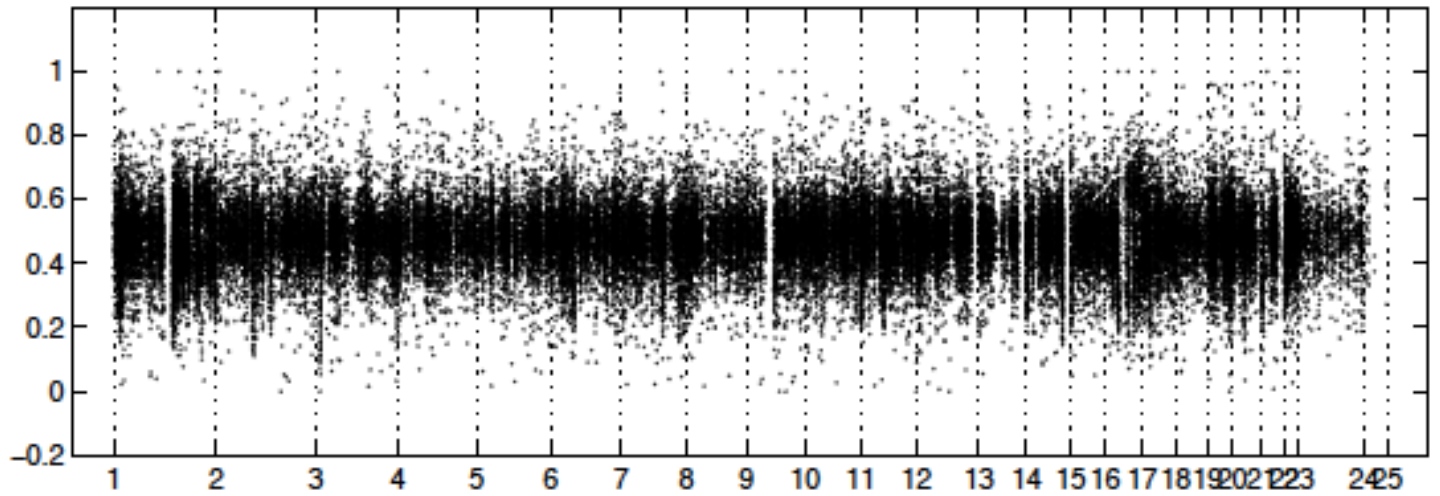

451\_ucsc.edu\_BRCA.IlluminaGA\_DNASeq.Level\_2.2.0.0\_TCGA-A2-A0SU\_D  
germline-het

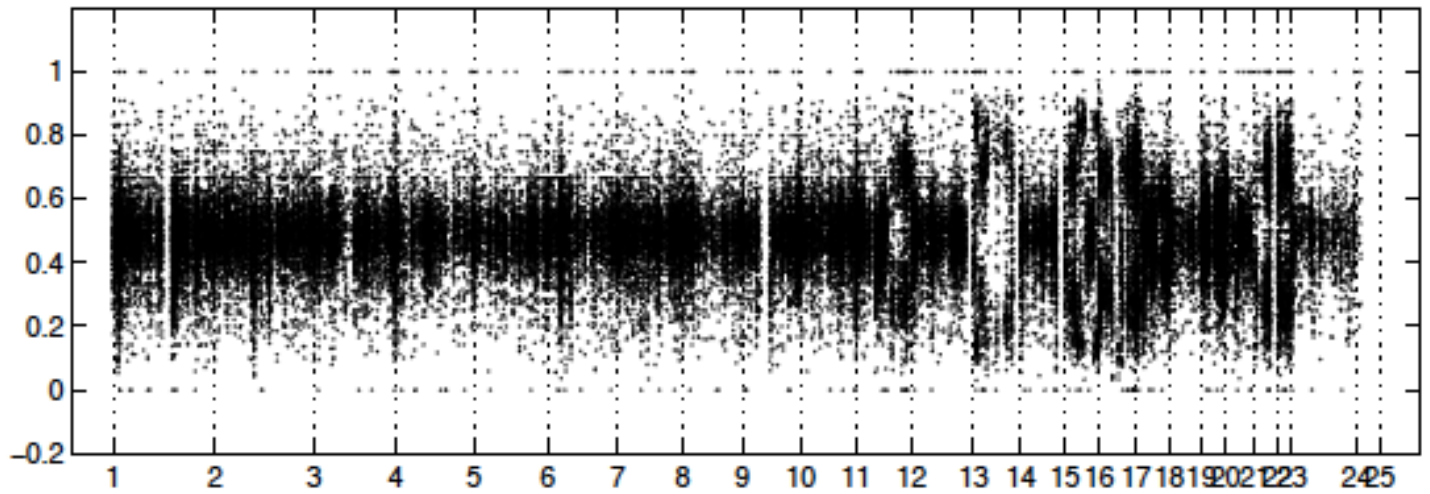



452\_ucsc.edu\_BRCA.IlluminaGA\_DNASeq.Level\_2.10.0.0\_TCGA-BH-A1F0\_D  
germline-het

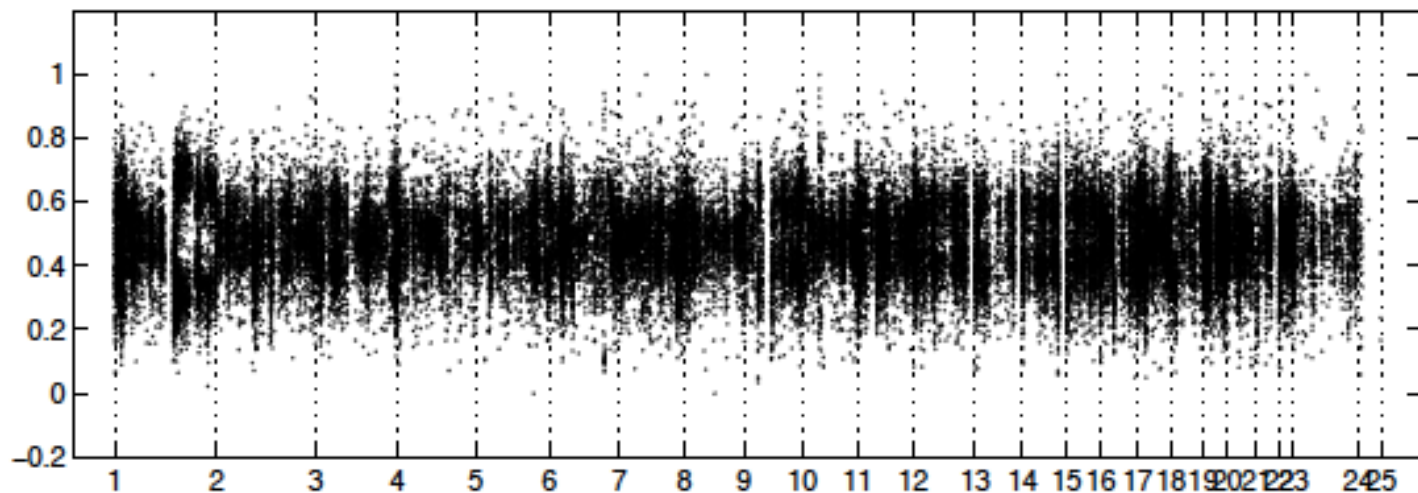

453\_ucsc.edu\_BRCA.IlluminaGA\_DNASeq.Level\_2.11.0.0\_TCGA-C8-A12N\_D  
germline-het

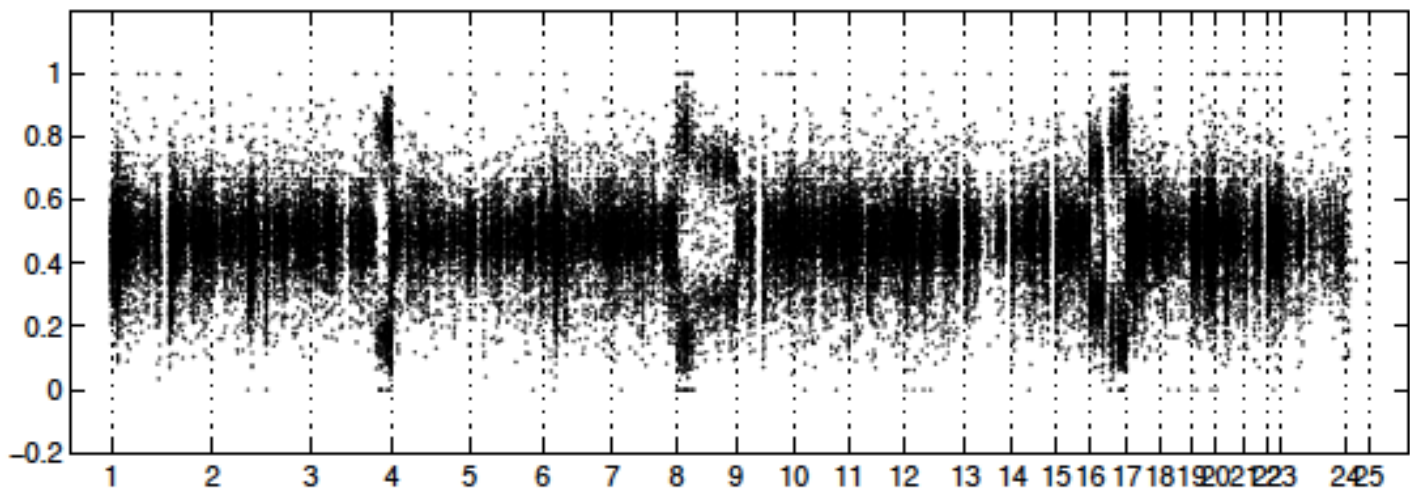

454\_ucsc.edu\_BRCA.IlluminaGA\_DNASeq.Level\_2.9.0.0\_TCGA-B6-A0RN\_D  
germline-het

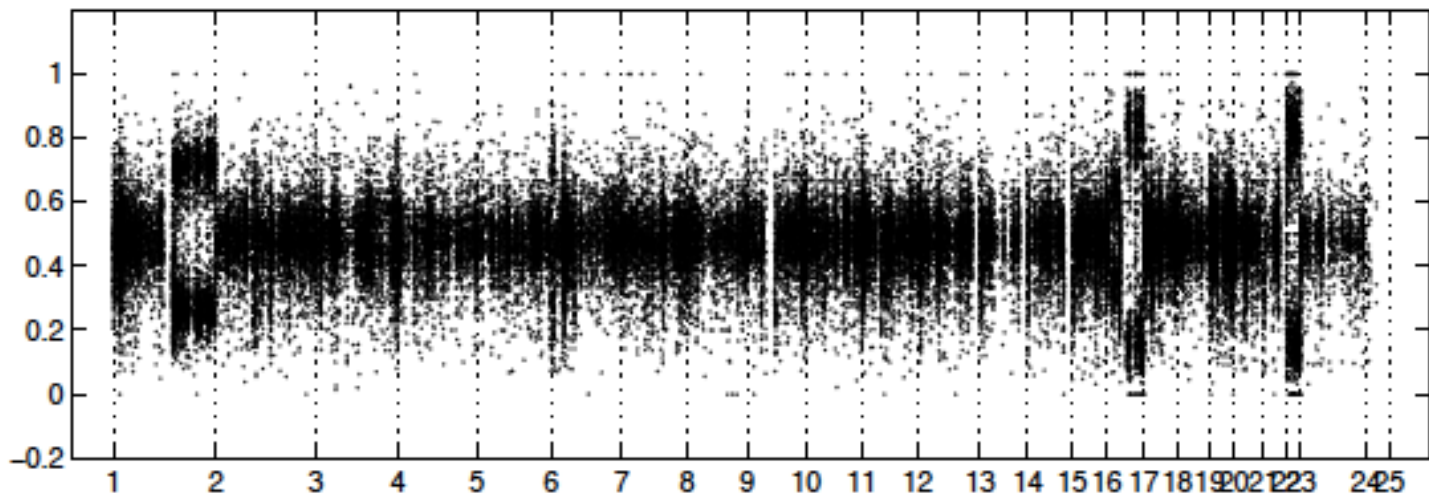

455\_ucsc.edu\_BRCA.IlluminaGA\_DNASeq.Level\_2.10.0.0\_TCGA-BH-A0E1\_D  
germline-het

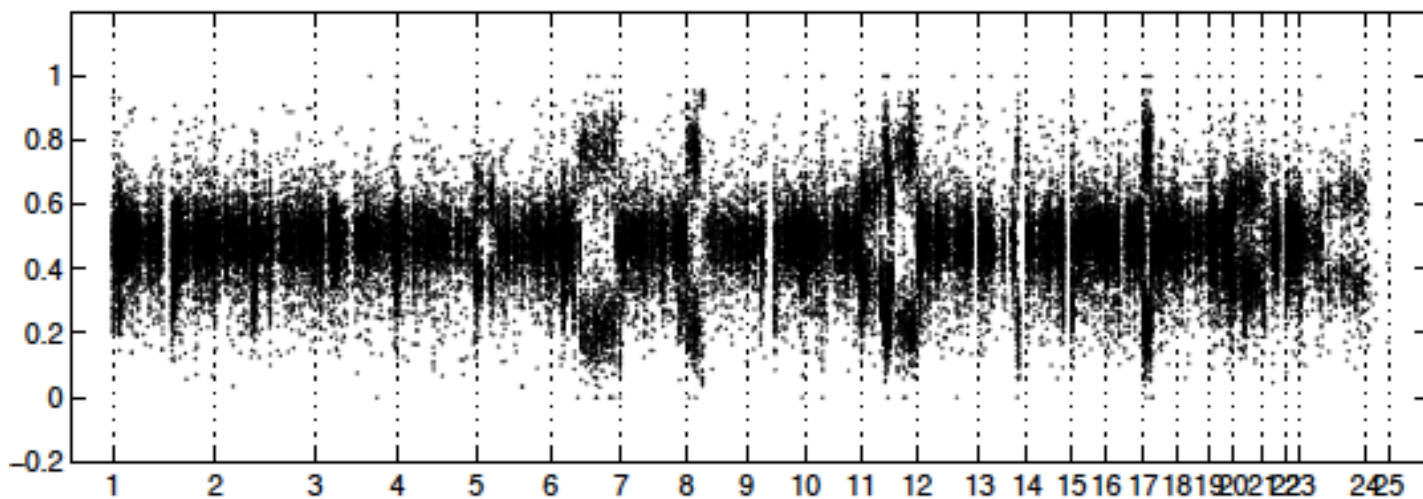

456\_ucsc.edu\_BRCA.IlluminaGA\_DNASeq.Level\_2.10.0.0\_TCGA-BH-A1E1\_D  
germline-het

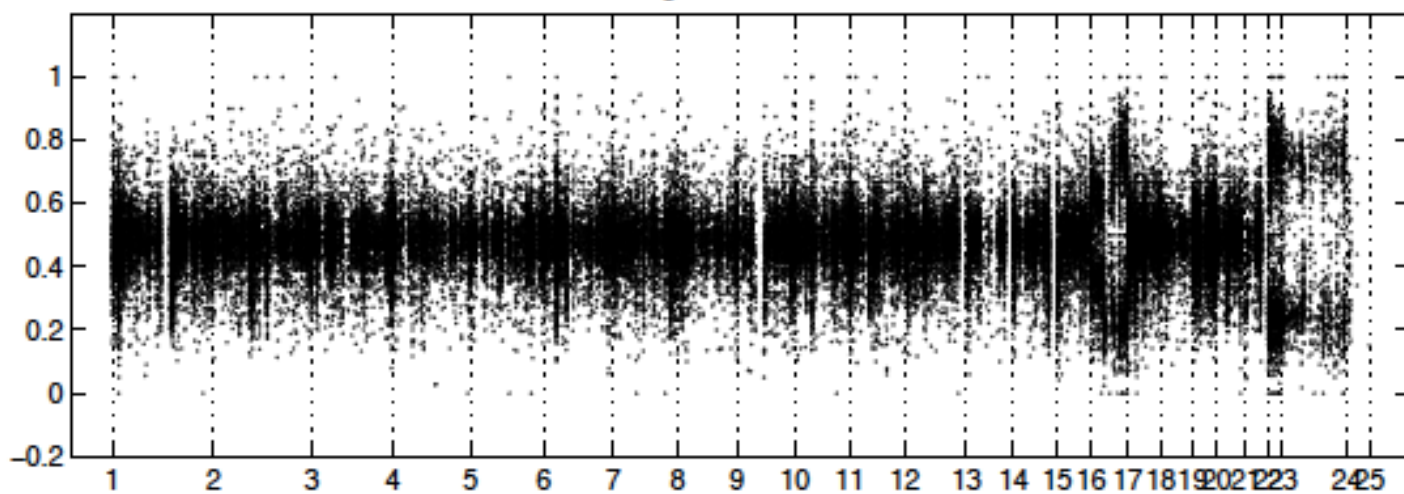

457\_ucsc.edu\_BRCA.IlluminaGA\_DNASeq.Level\_2.10.0.0\_TCGA-BH-A18F\_D  
germline-het

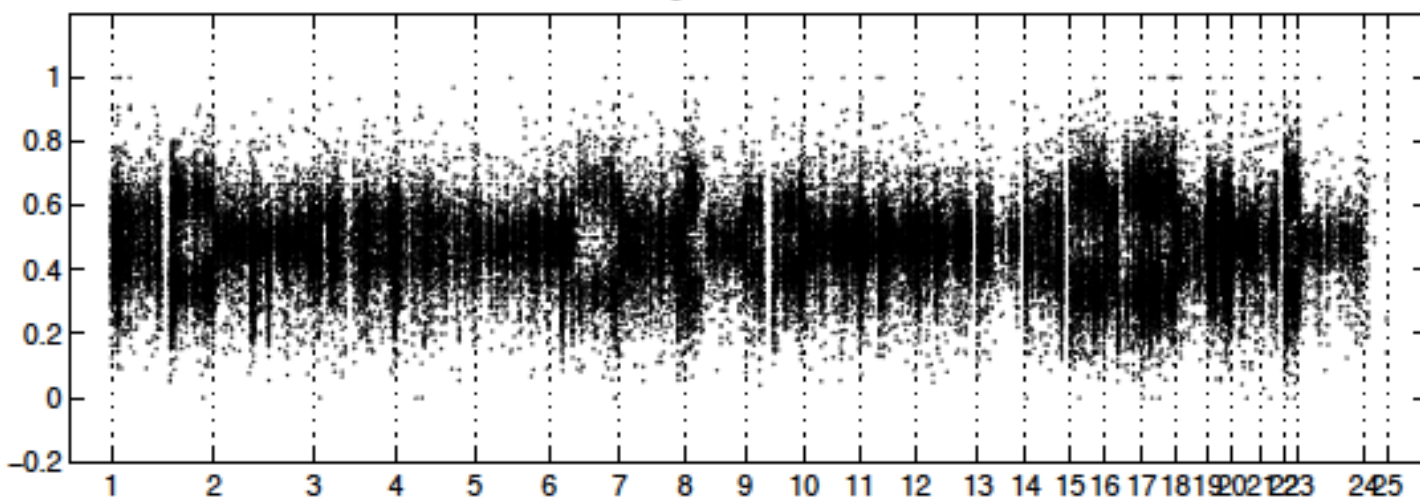

458\_ucsc.edu\_BRCA.IlluminaGA\_DNASeq.Level\_2.8.0.0\_TCGA-AR-A1AO\_D  
germline-het

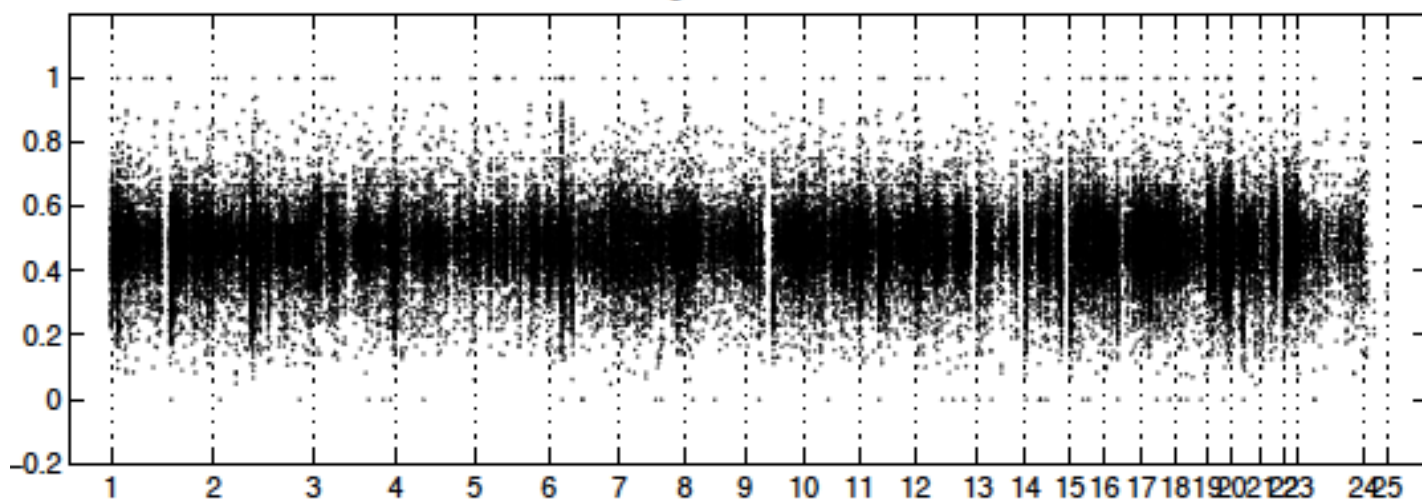

459\_ucsc.edu\_BRCA.IlluminaGA\_DNASeq.Level\_2.10.0.0\_TCGA-BH-A0DE\_D  
germline-het

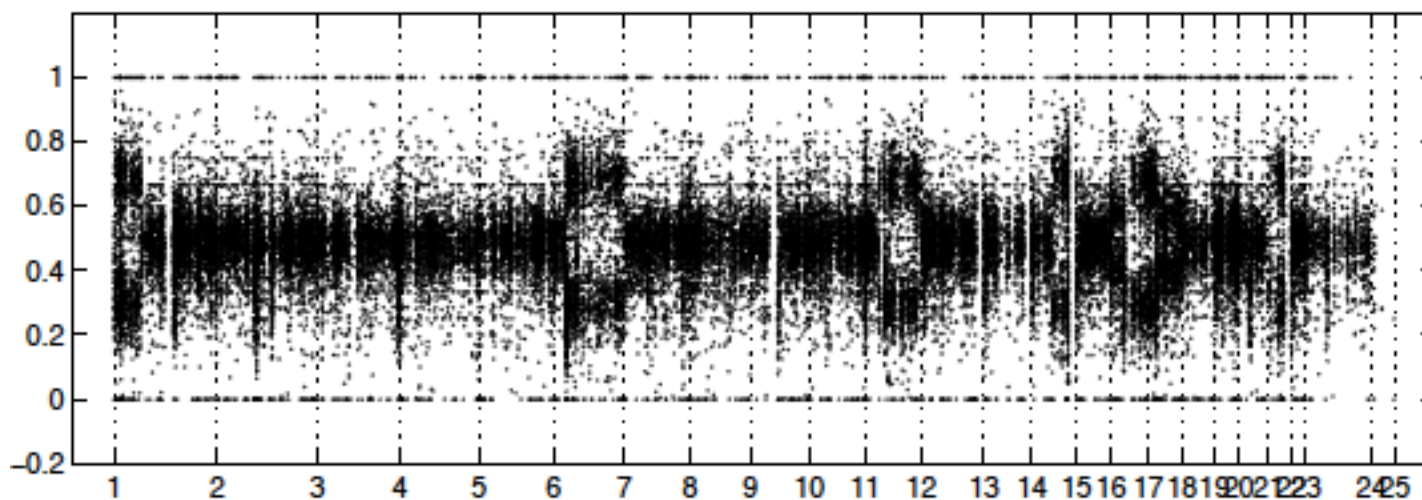

460\_ucsc.edu\_BRCA.IlluminaGA\_DNASeq.Level\_2.13.0.0\_TCGA-E2-A15J\_D  
germline-het

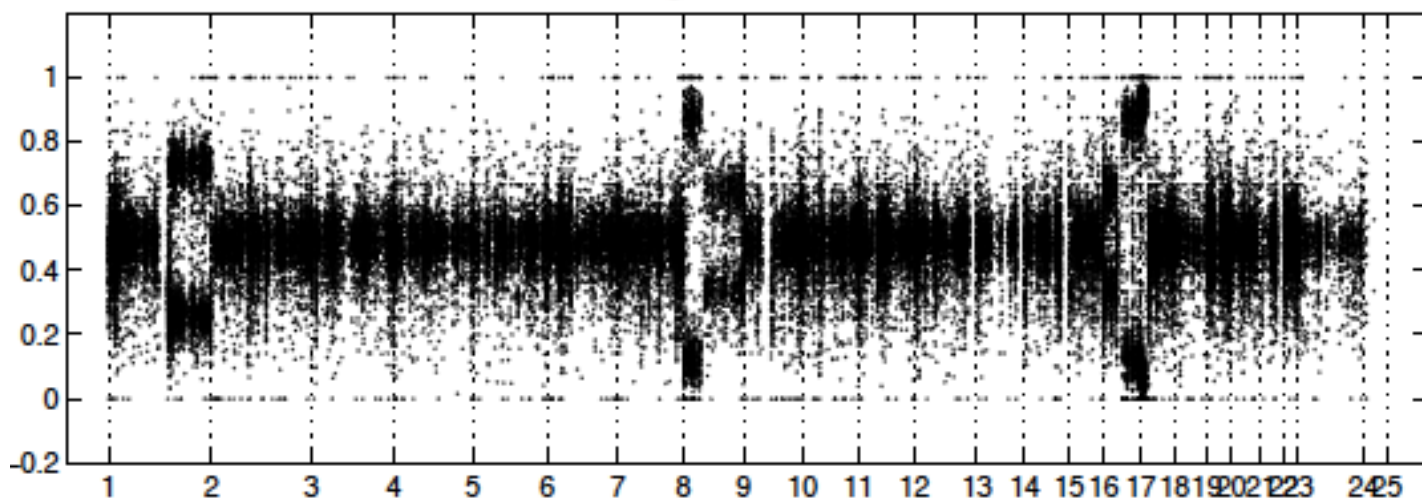

461\_ucsc.edu\_BRCA.IlluminaGA\_DNASeq.Level\_2.8.0.0\_TCGA-AR-A1AL\_D  
germline-het

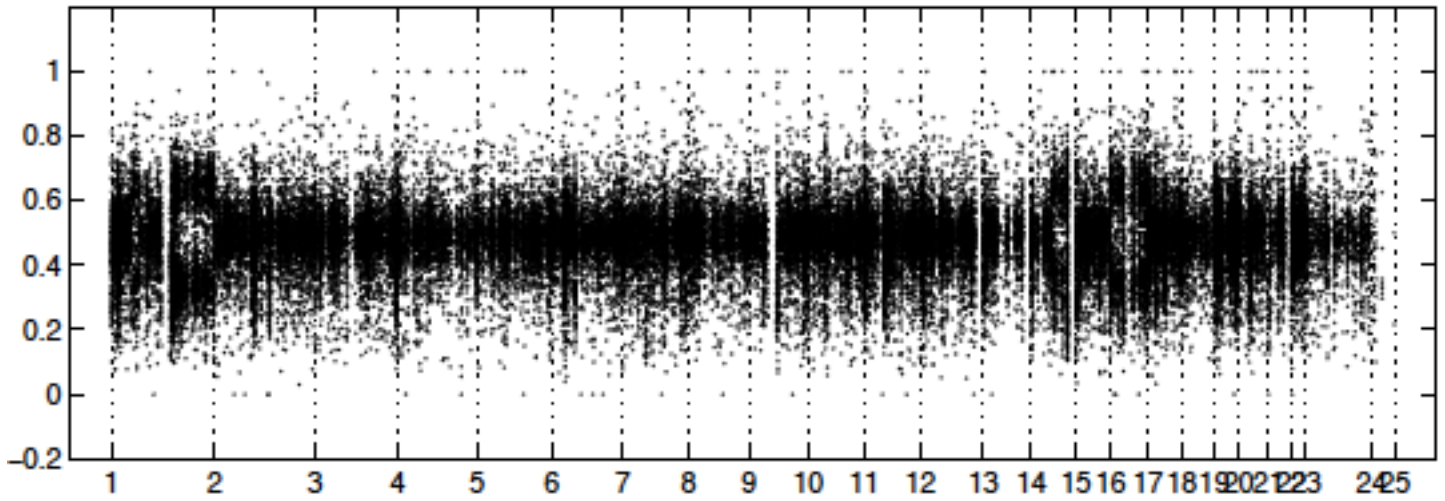

462\_ucsc.edu\_BRCA.IlluminaGA\_DNASeq.Level\_2.8.0.0\_TCGA-AR-A1AT\_D  
germline-het

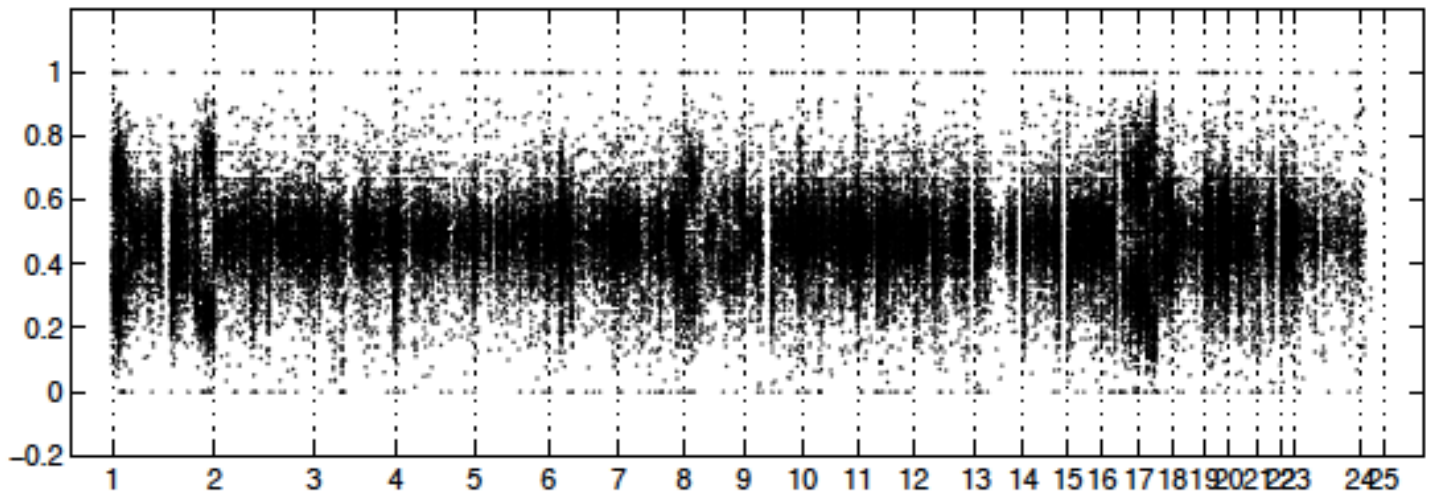

463\_ucsc.edu\_BRCA.IlluminaGA\_DNASeq.Level\_2.10.0.0\_TCGA-BH-A0W4\_D  
germline-het

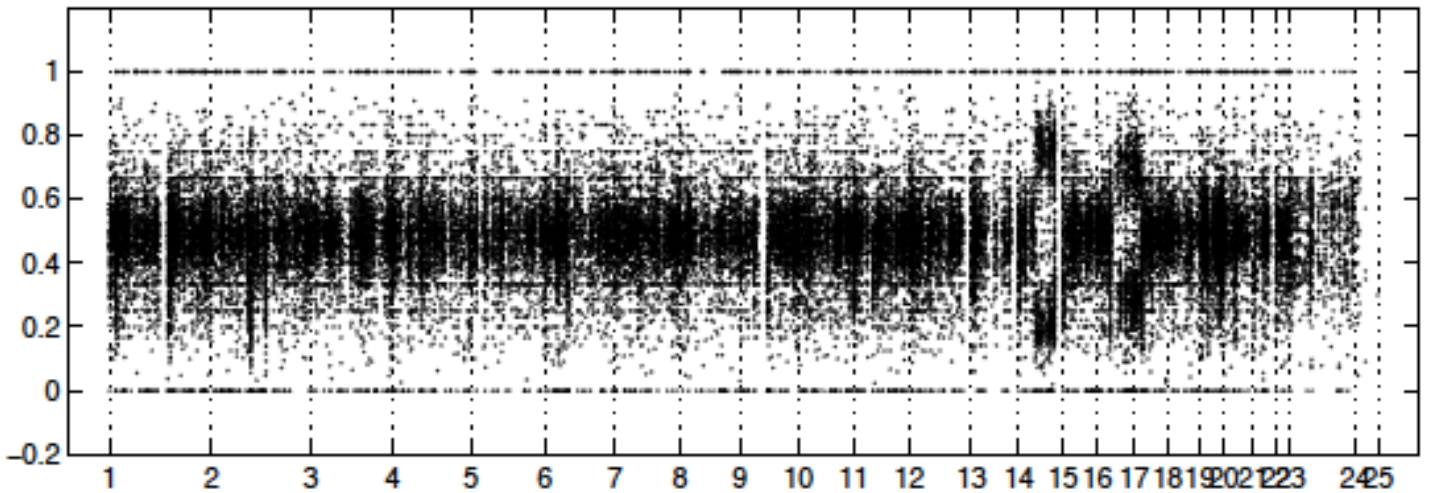

464\_ucsc.edu\_BRCA.IlluminaGA\_DNASeq.Level\_2.2.0.0\_TCGA-A2-A0ST\_D  
germline-het

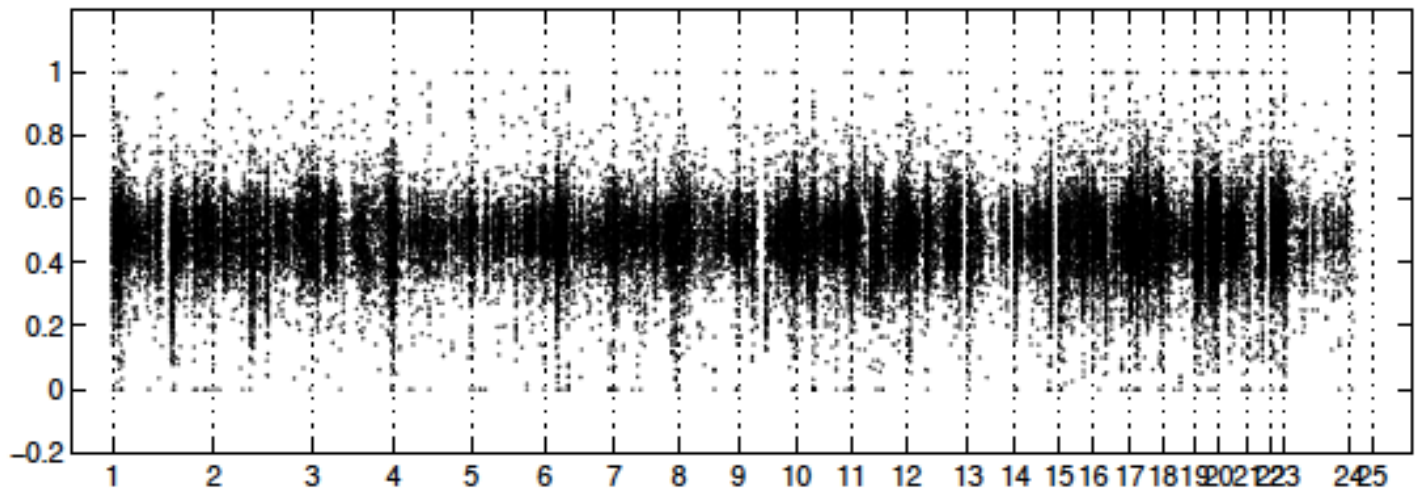

465\_ucsc.edu\_BRCA.IlluminaGA\_DNASeq.Level\_2.13.0.0\_TCGA-E2-A15G\_D  
germline-het

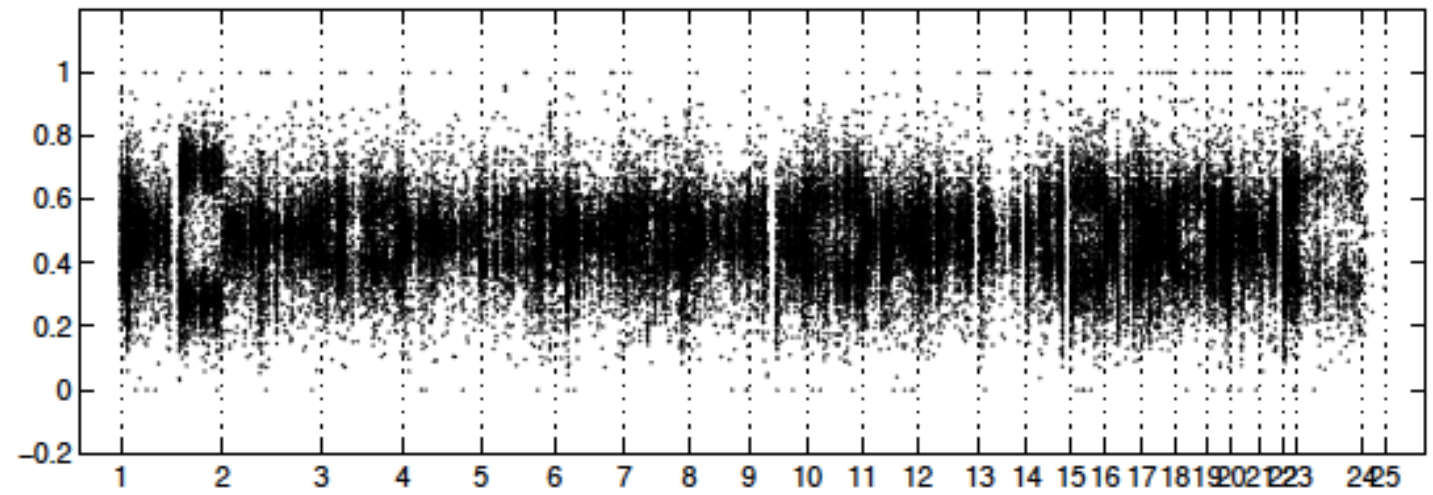

466\_ucsc.edu\_BRCA.IlluminaGA\_DNASeq.Level\_2.9.0.0\_TCGA-B6-A0X0\_D  
germline-het

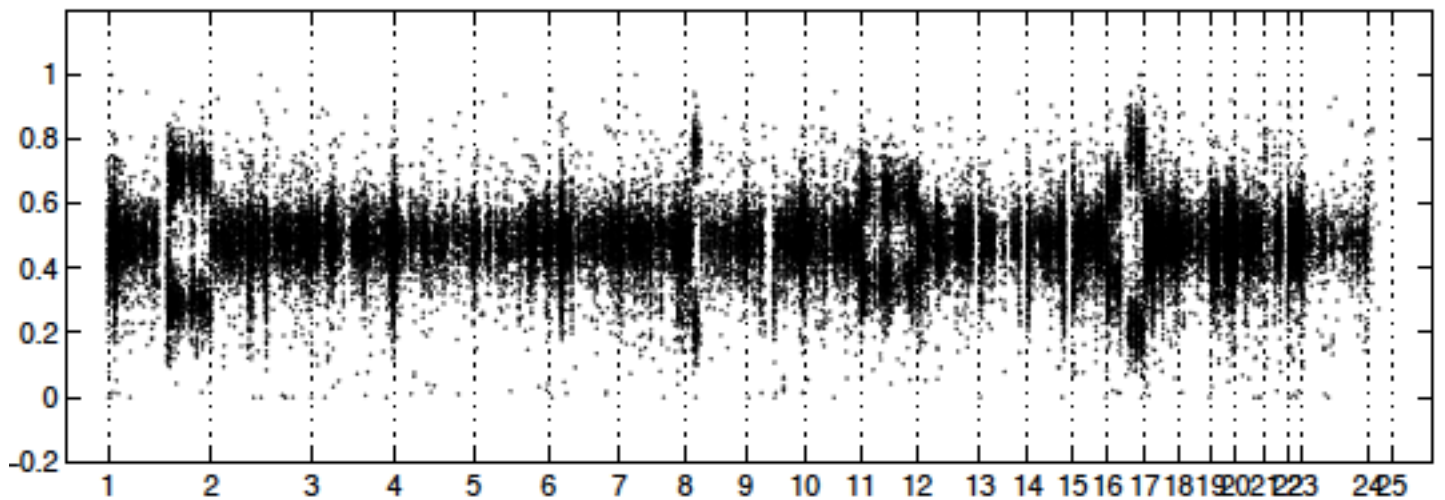

467\_ucsc.edu\_BRCA.IlluminaGA\_DNASeq.Level\_2.9.0.0\_TCGA-B6-A01C\_W  
germline-het

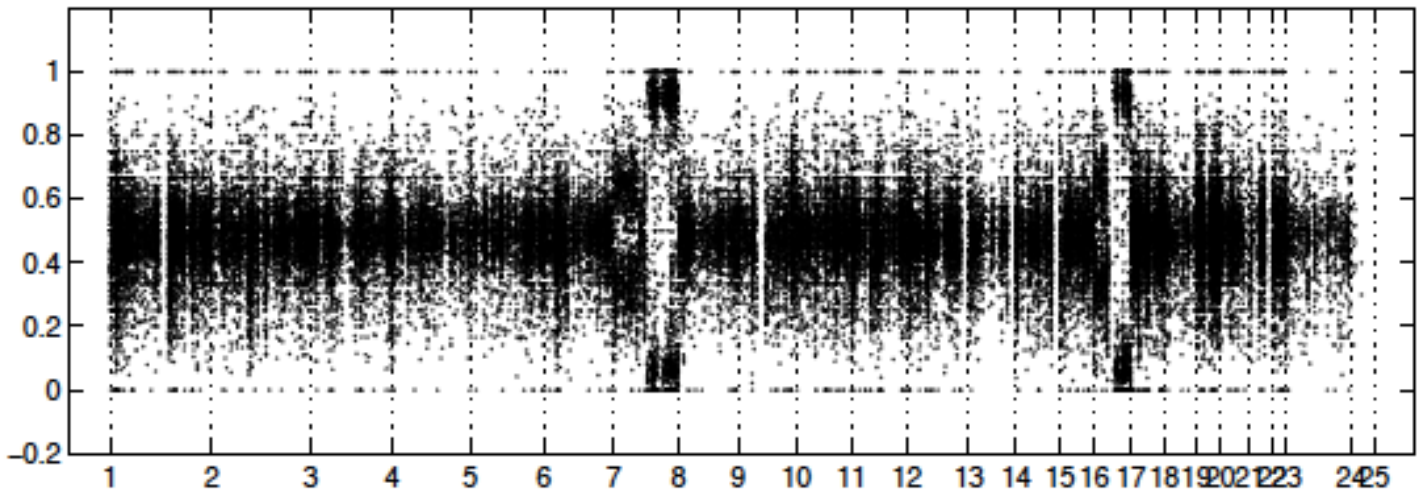

468\_ucsc.edu\_BRCA.IlluminaGA\_DNASeq.Level\_2.13.0.0\_TCGA-E2-A1B1\_D  
germline-het

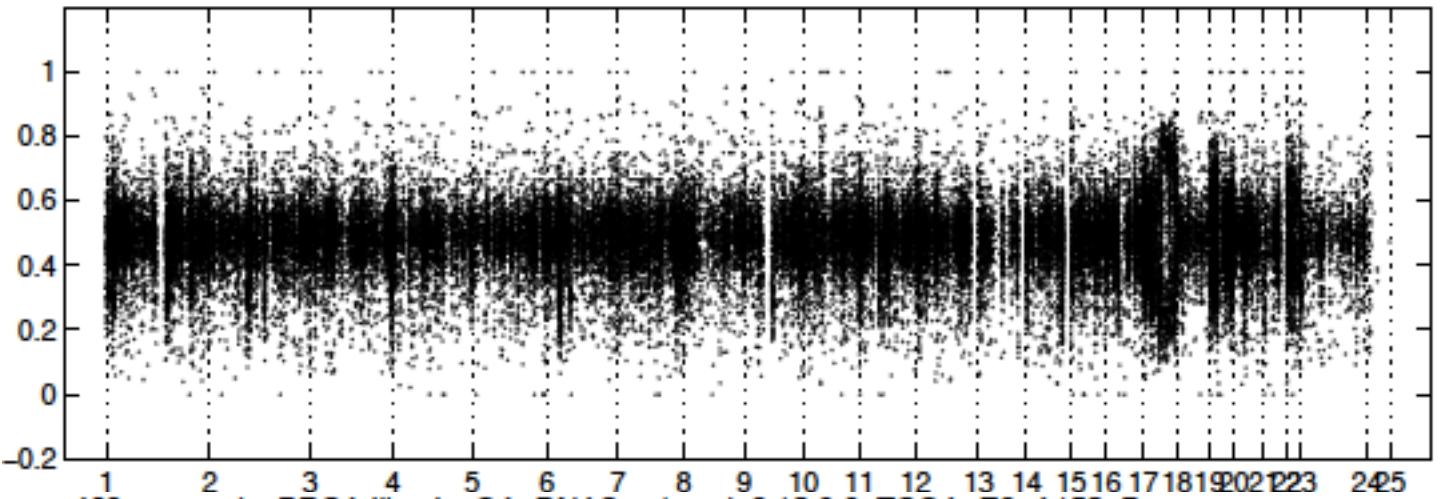

469\_ucsc.edu\_BRCA.IlluminaGA\_DNASeq.Level\_2.13.0.0\_TCGA-E2-A153\_D  
germline-het

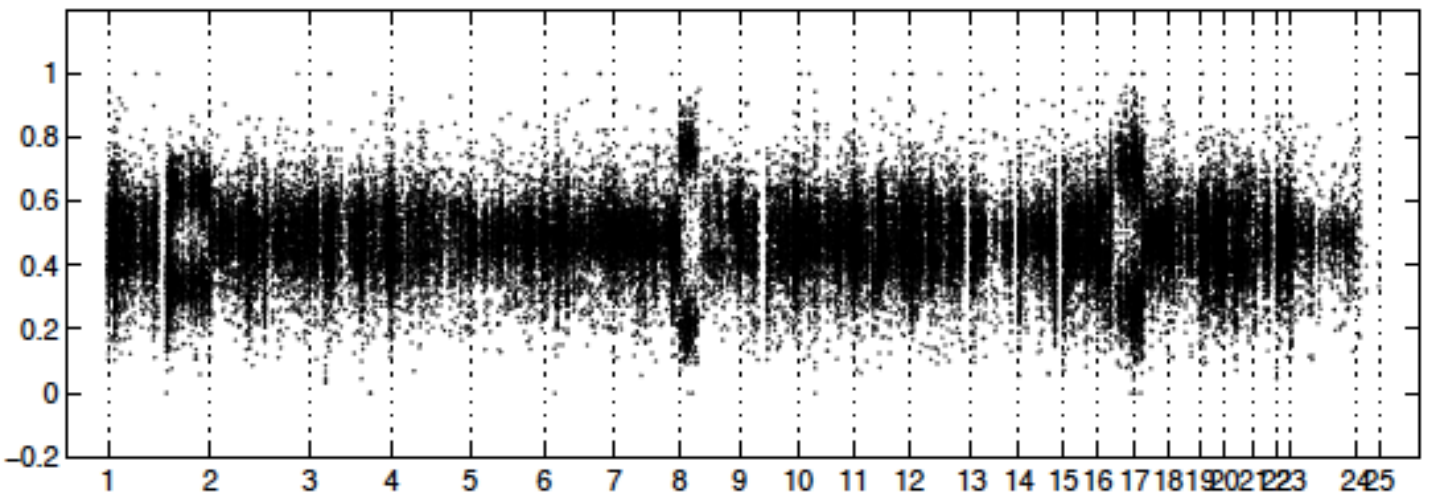

470\_ucsc.edu\_BRCA.IlluminaGA\_DNASeq.Level\_2.2.0.0\_TCGA-A2-A0CZ\_W  
germline-het

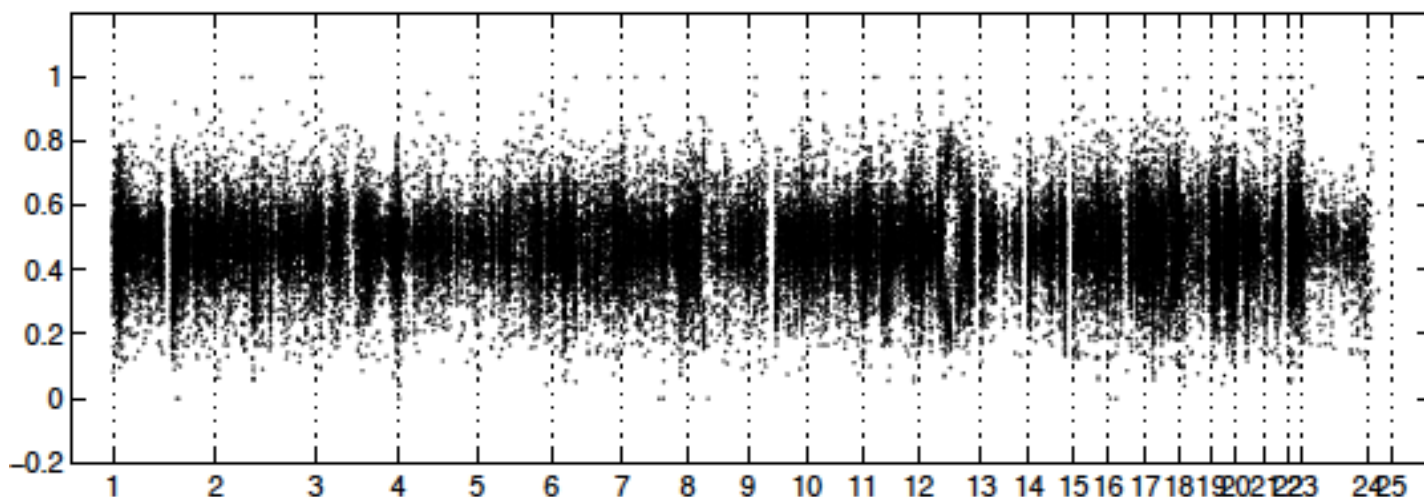

471\_ucsc.edu\_BRCA.IlluminaGA\_DNASeq.Level\_2.12.0.0\_TCGA-D8-A141\_D  
germline-het

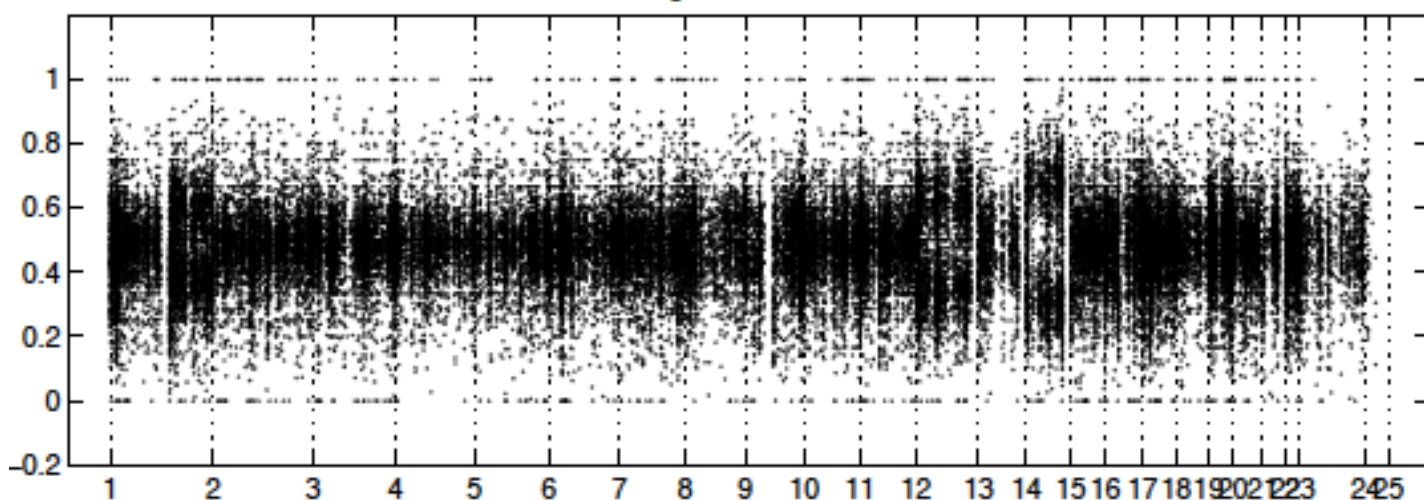

472\_ucsc.edu\_BRCA.IlluminaGA\_DNASeq.Level\_2.10.0.0\_TCGA-BH-A0H3\_D  
germline-het

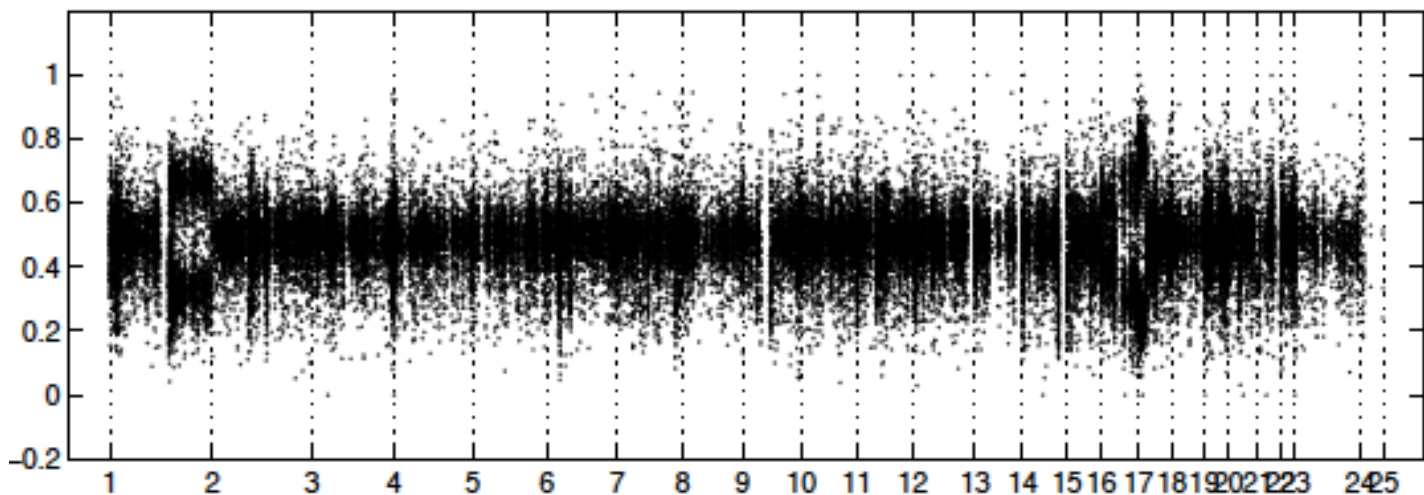

473\_ucsc.edu\_BRCA.IlluminaGA\_DNASeq.Level\_2.10.0.0\_TCGA-BH-A0DO\_D  
germline-het

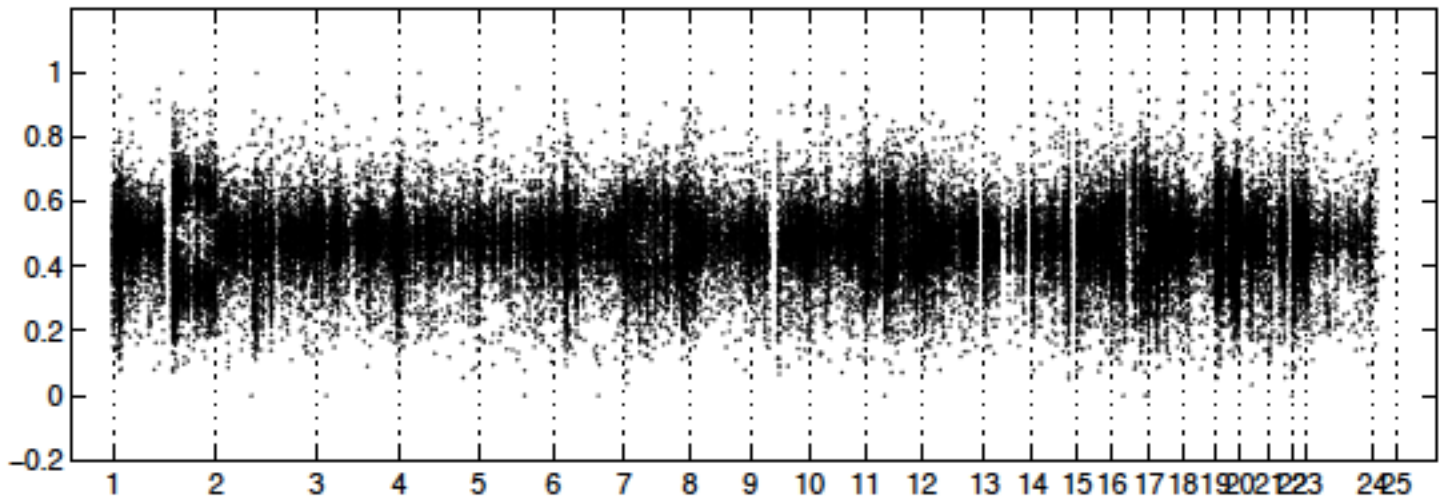

474\_ucsc.edu\_BRCA.IlluminaGA\_DNASeq.Level\_2.10.0.0\_TCGA-BH-A0DG\_D  
germline-het

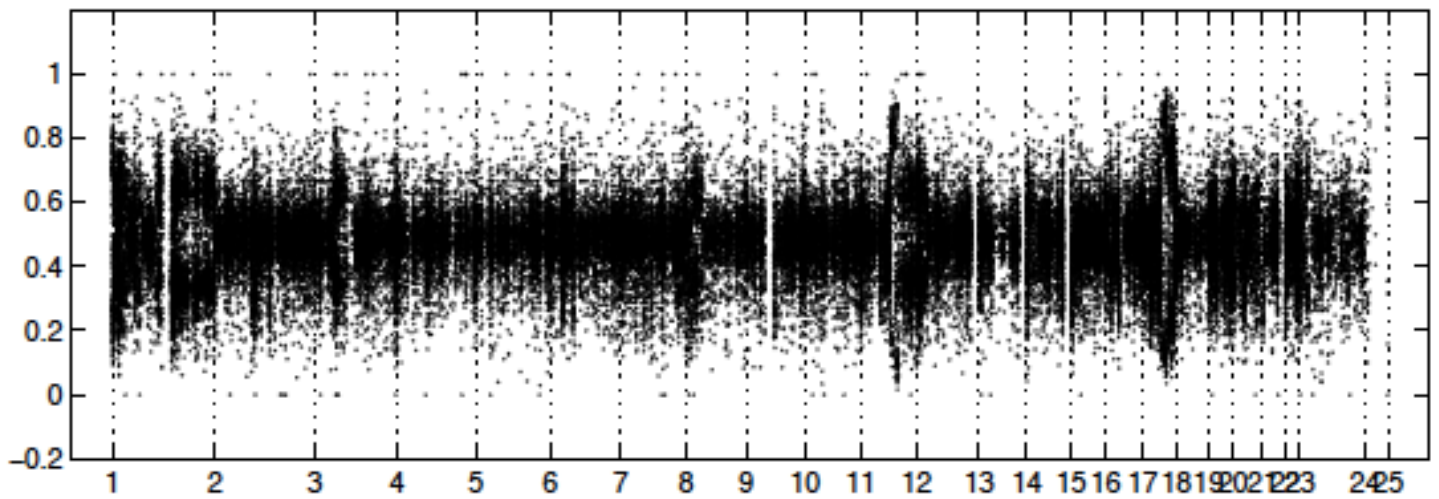

475\_ucsc.edu\_BRCA.IlluminaGA\_DNASeq.Level\_2.9.0.0\_TCGA-B6-A0RT\_D  
germline-het

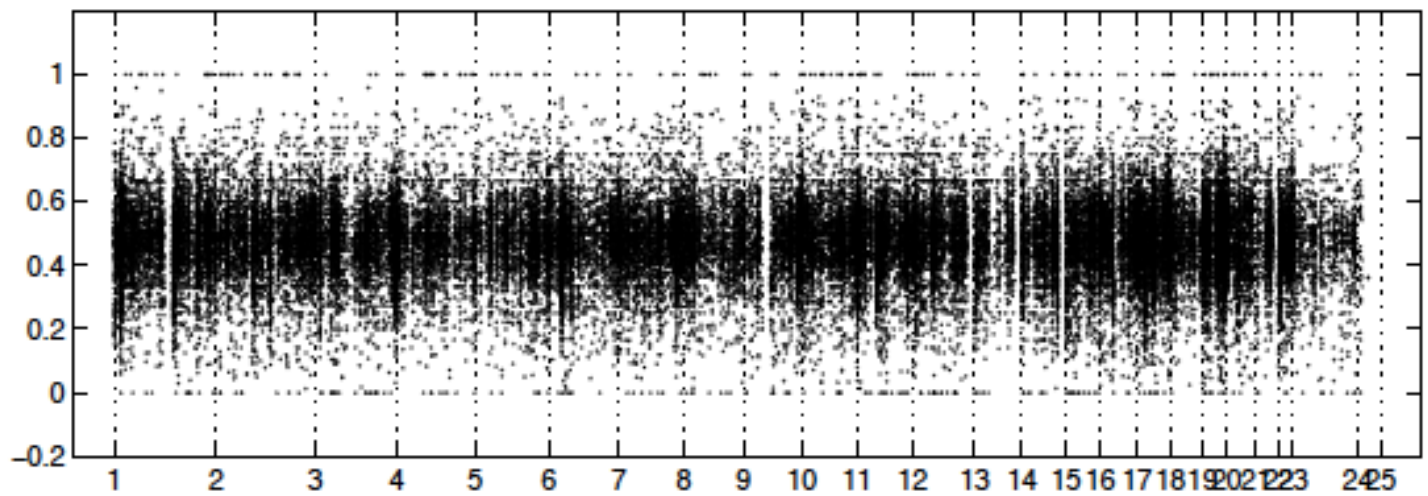



476\_ucsc.edu\_BRCA.IlluminaGA\_DNASeq.Level\_2.2.0.0\_TCGA-A2-A0T5\_D  
germline-het

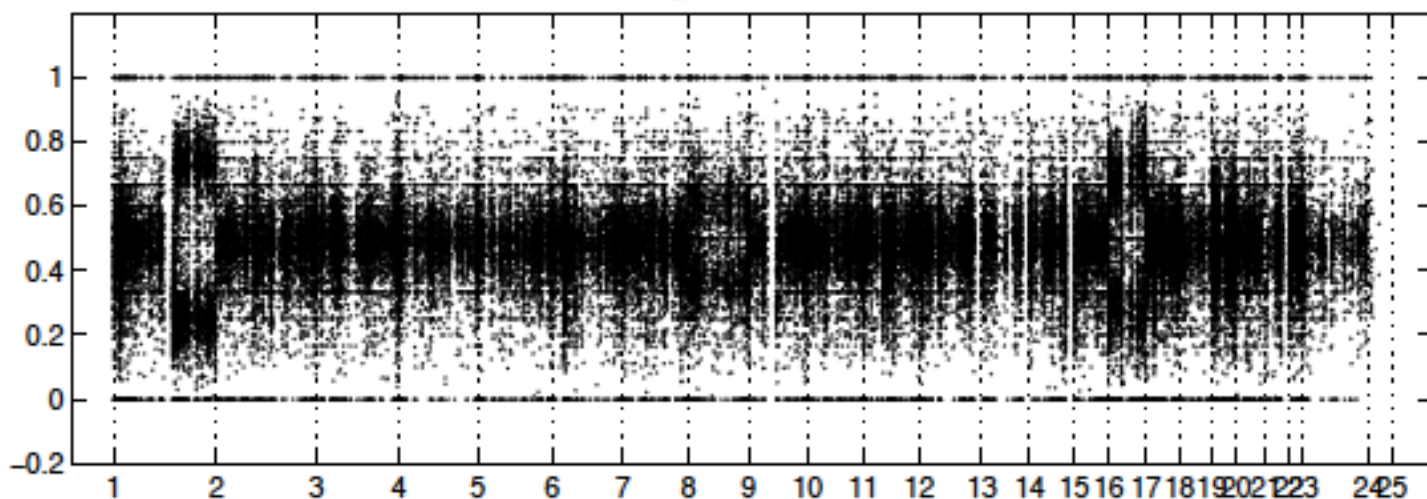

477\_ucsc.edu\_BRCA.IlluminaGA\_DNASeq.Level\_2.4.0.0\_TCGA-A8-A08C\_W  
germline-het

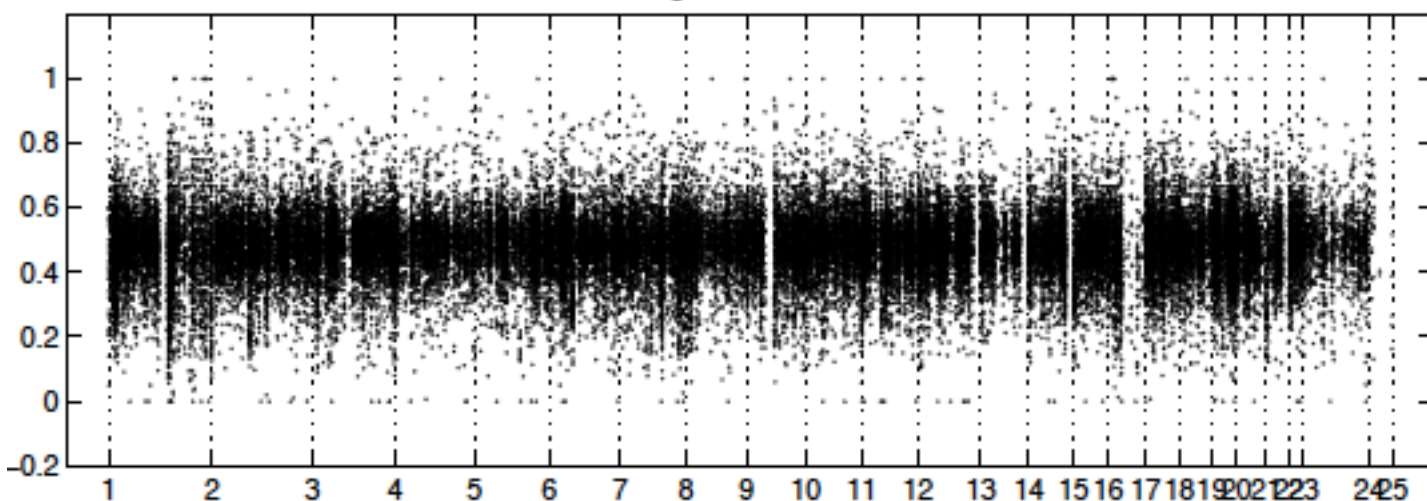

478\_ucsc.edu\_BRCA.IlluminaGA\_DNASeq.Level\_2.13.0.0\_TCGA-E2-A10F\_D  
germline-het

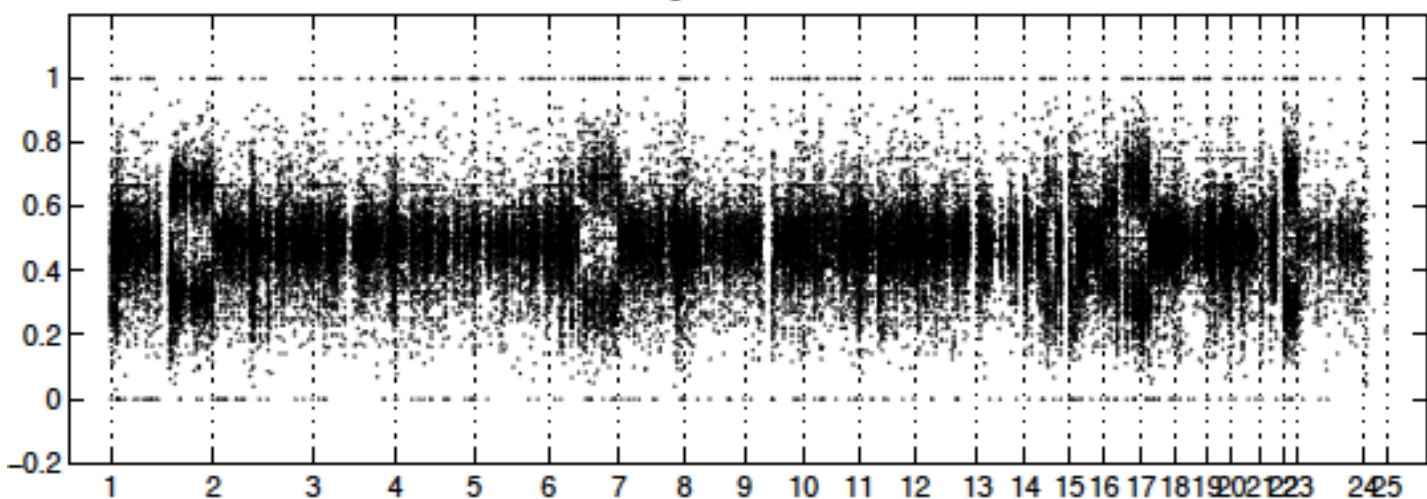

479\_ucsc.edu\_BRCA.IlluminaGA\_DNASeq.Level\_2.2.0.0\_TCGA-A2-A0D3\_D  
germline-het

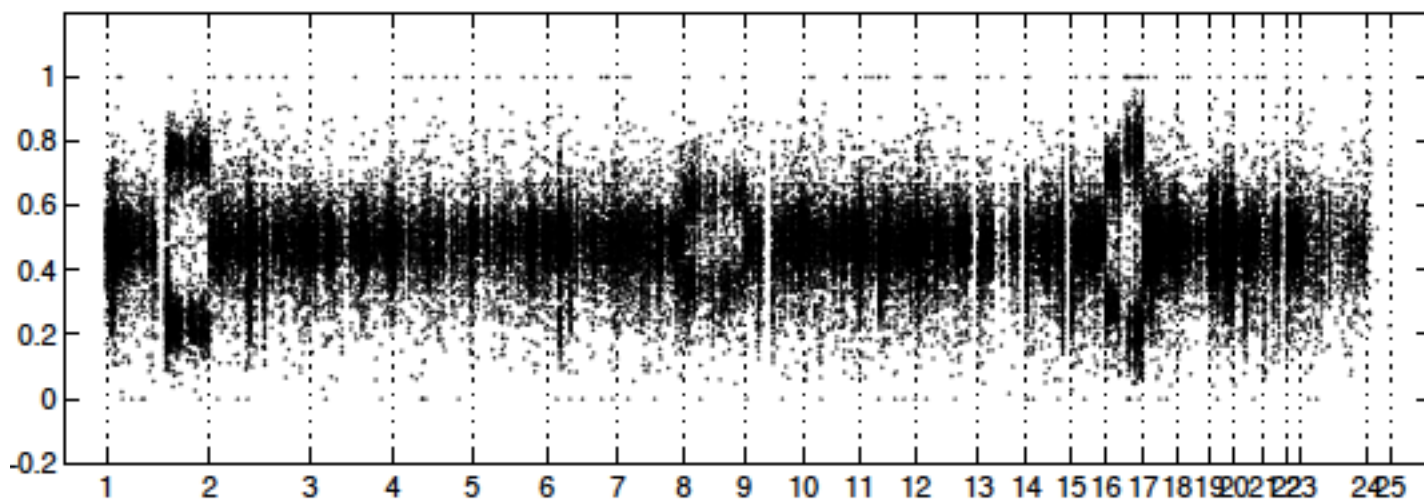

480\_ucsc.edu\_BRCA.IlluminaGA\_DNASeq.Level\_2.2.0.0\_TCGA-A2-A0ES\_D  
germline-het

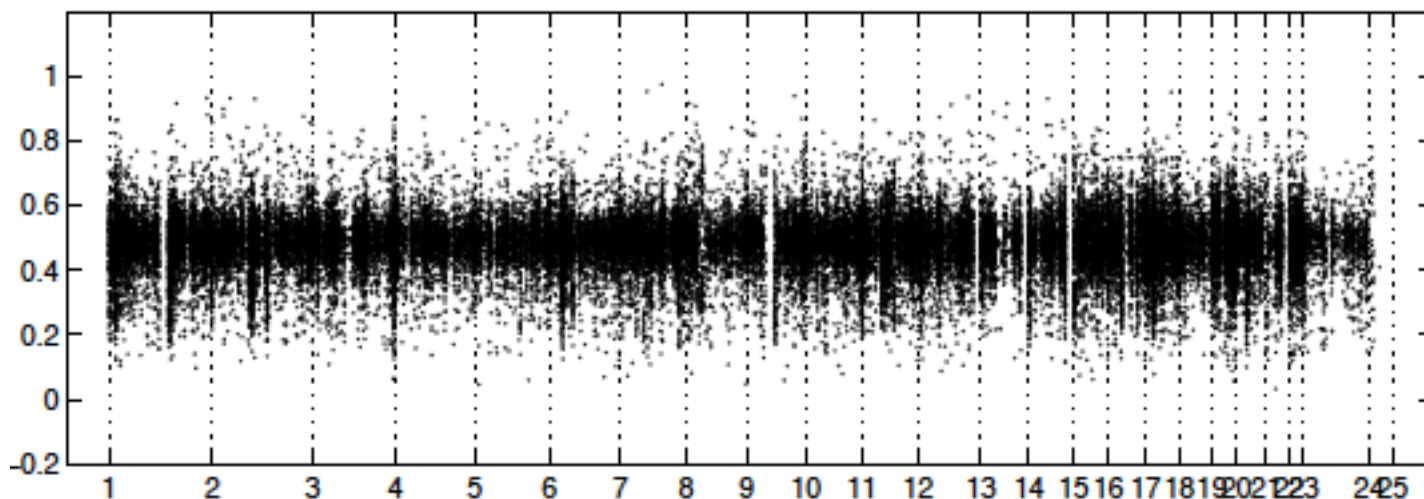

481\_ucsc.edu\_BRCA.IlluminaGA\_DNASeq.Level\_2.8.0.0\_TCGA-AR-A1AW\_D  
germline-het

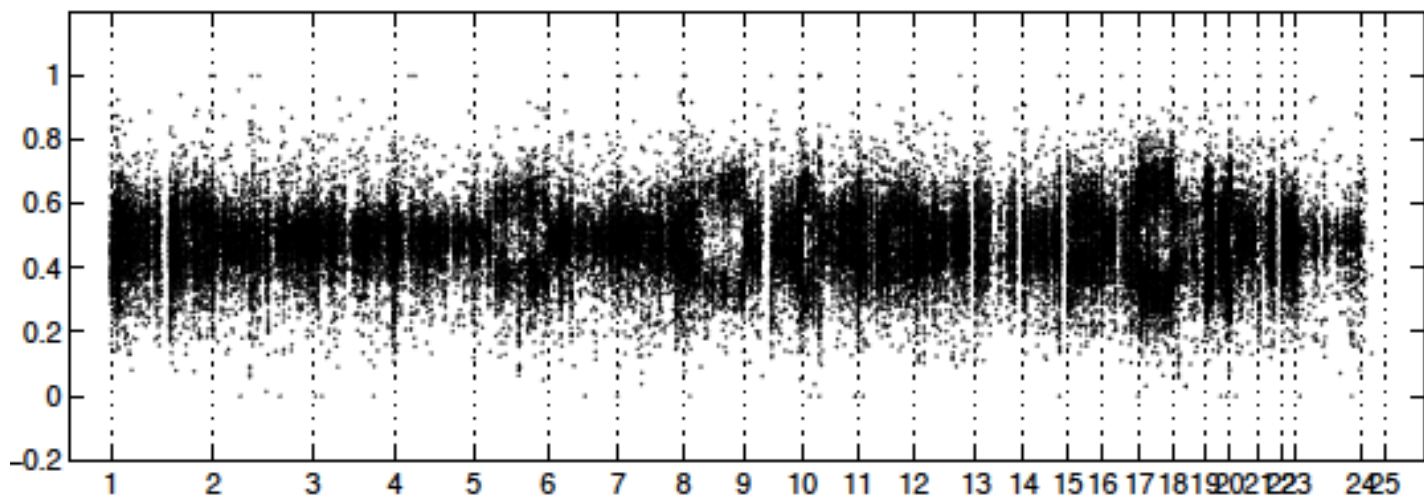

482\_ucsc.edu\_BRCA.IlluminaGA\_DNASeq.Level\_2.2.0.0\_TCGA-A2-A04Q\_W  
germline-het

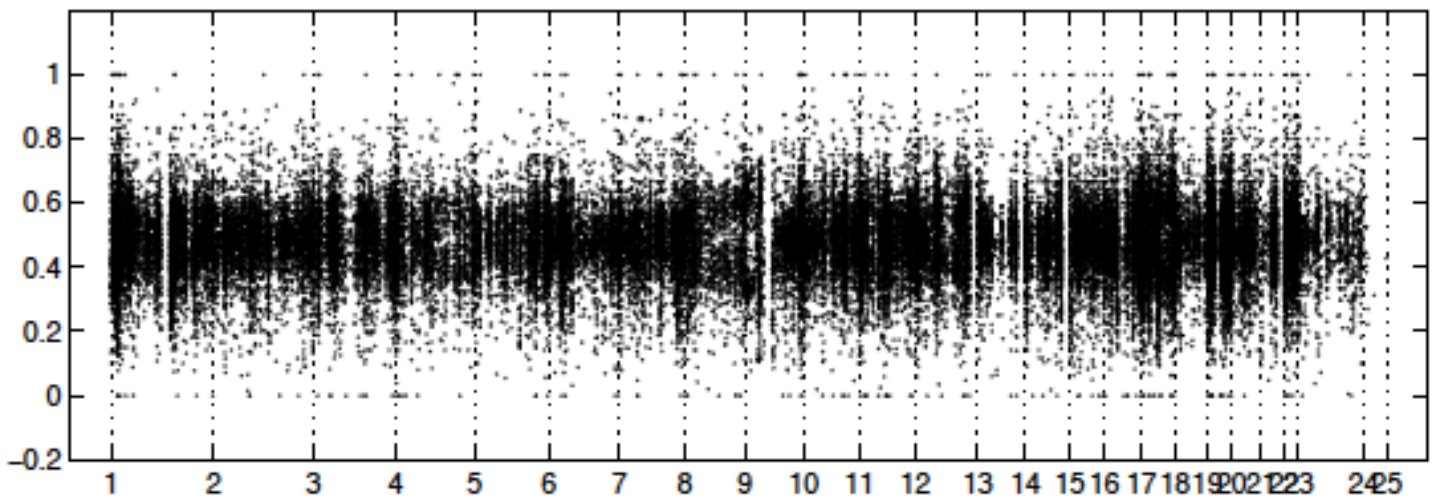

483\_ucsc.edu\_BRCA.IlluminaGA\_DNASeq.Level\_2.13.0.0\_TCGA-E2-A14Q\_D  
germline-het

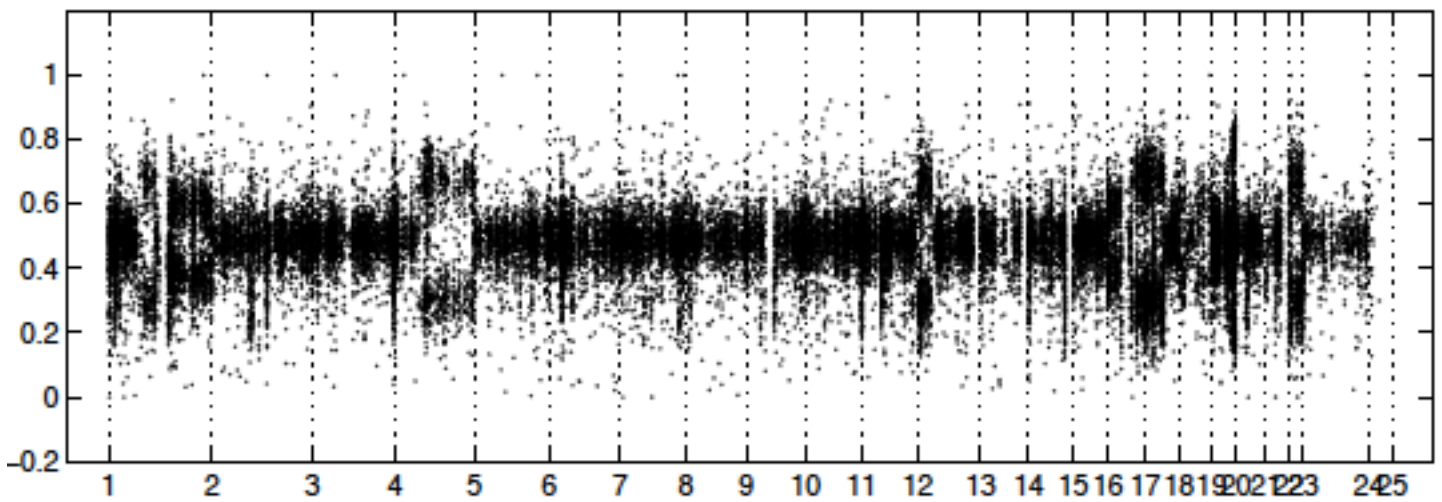

484\_ucsc.edu\_BRCA.IlluminaGA\_DNASeq.Level\_2.2.0.0\_TCGA-A2-A05Y\_D  
germline-het

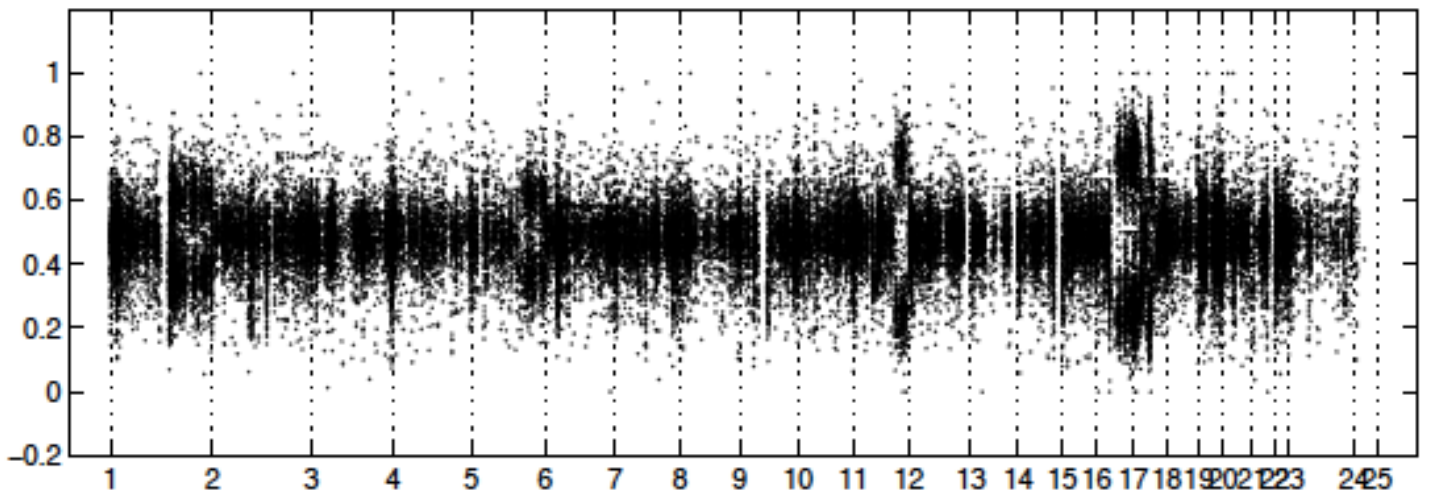

485\_ucsc.edu\_BRCA.IlluminaGA\_DNASeq.Level\_2.10.0.0\_TCGA-BH-A0DT\_D  
germline-het

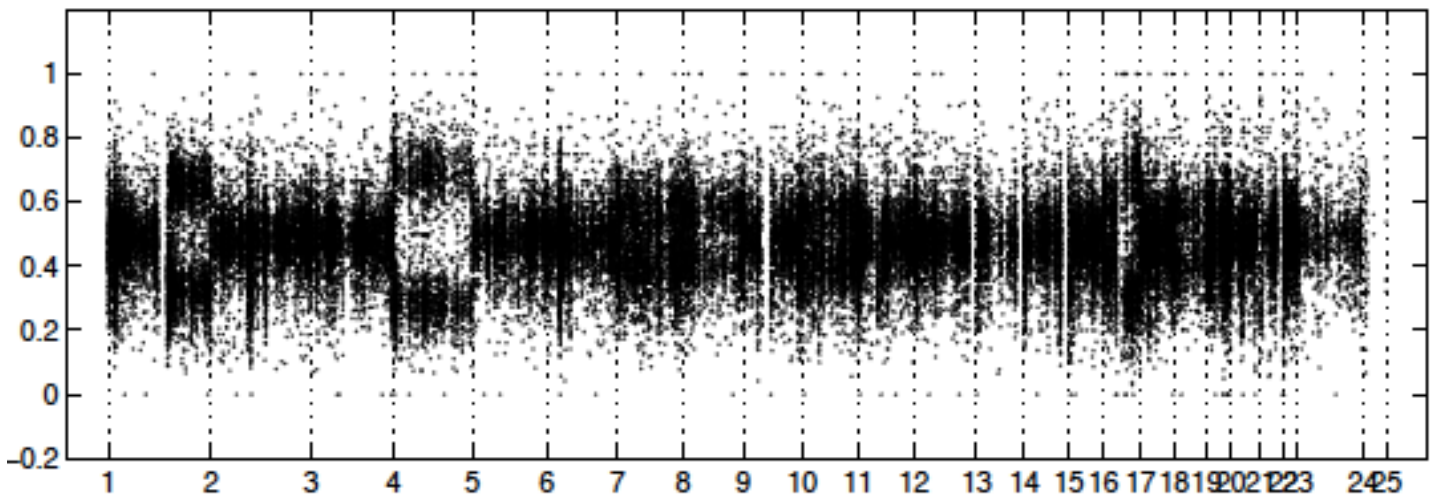

486\_ucsc.edu\_BRCA.IlluminaGA\_DNASeq.Level\_2.1.0.0\_TCGA-A1-A0SH\_D  
germline-het

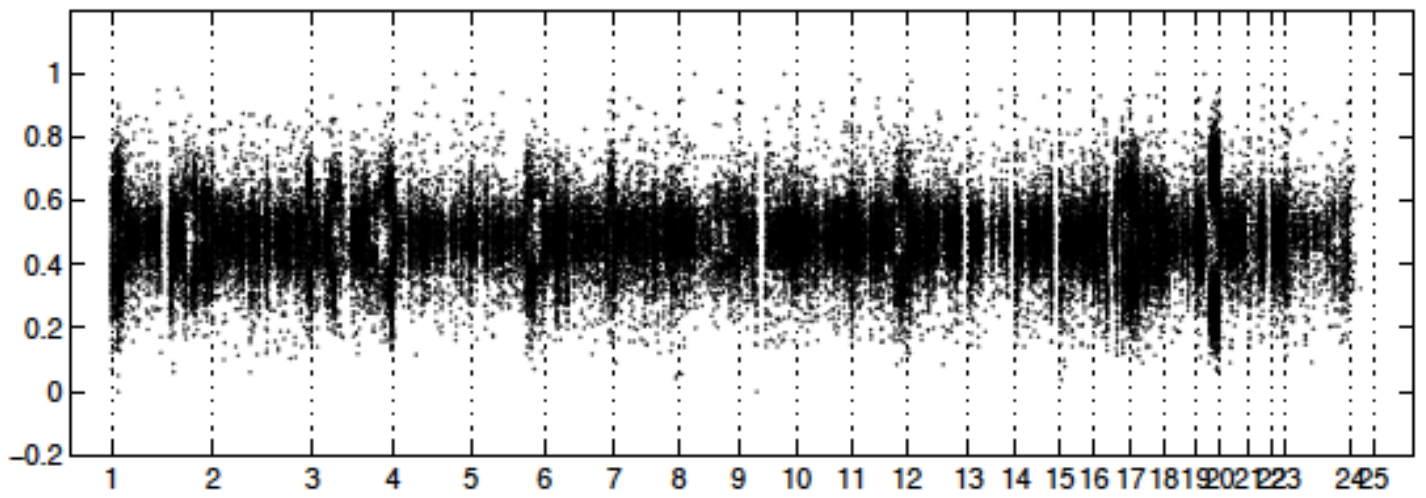

487\_ucsc.edu\_BRCA.IlluminaGA\_DNASeq.Level\_2.2.0.0\_TCGA-A2-A04N\_D  
germline-het

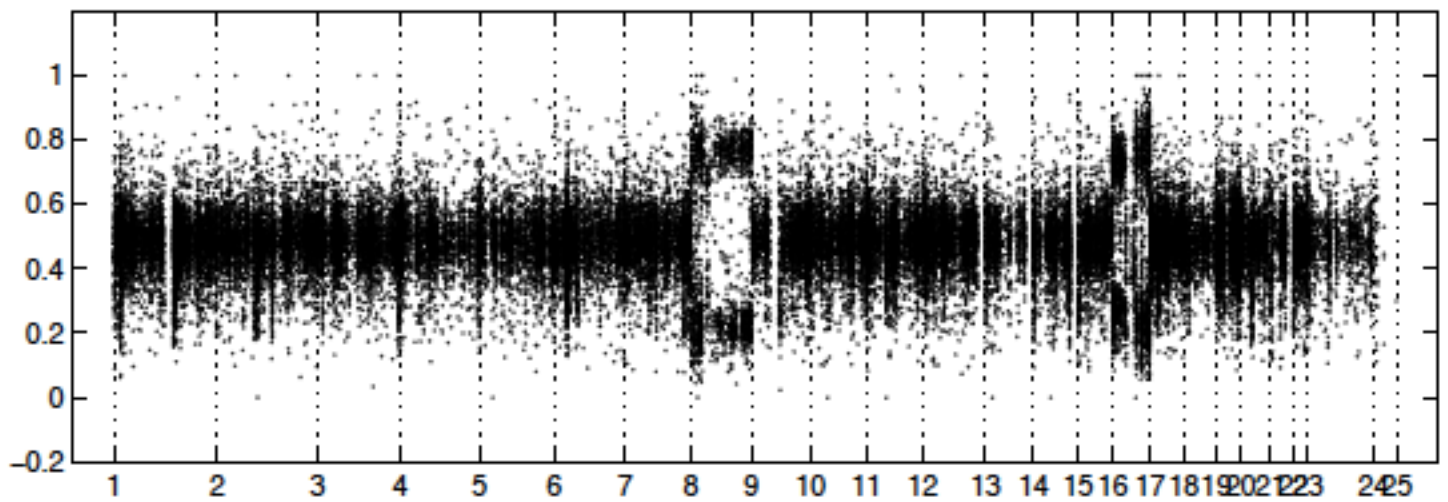

488\_ucsc.edu\_BRCA.IlluminaGA\_DNASeq.Level\_2.10.0.0\_TCGA-BH-A0B7\_D  
germline-het

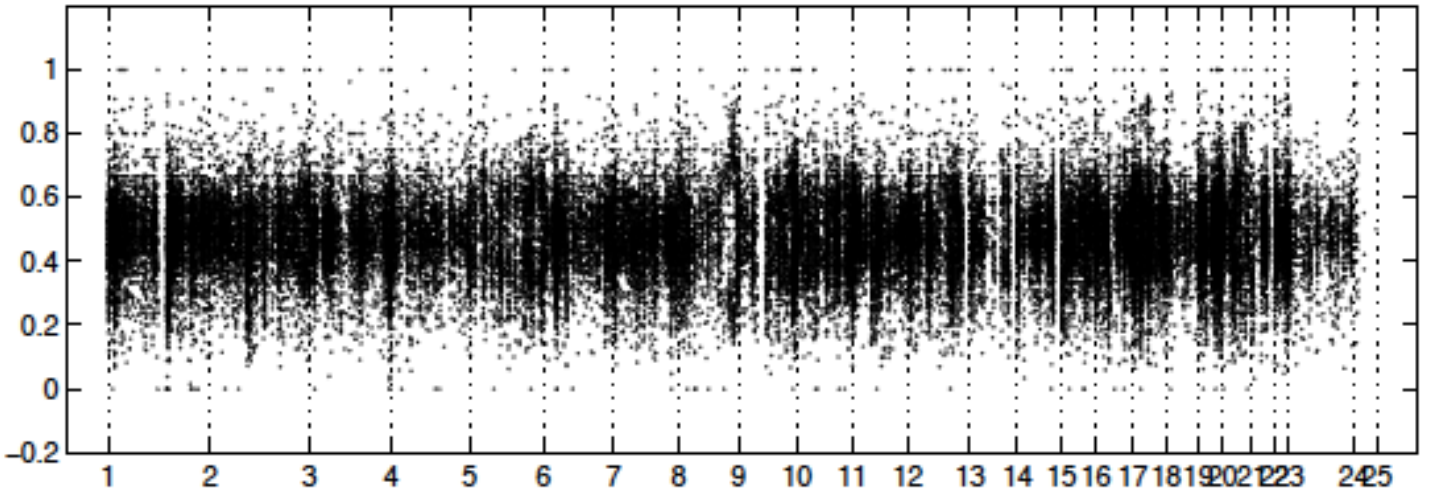

489\_ucsc.edu\_BRCA.IlluminaGA\_DNASeq.Level\_2.13.0.0\_TCGA-E2-A108\_D  
germline-het

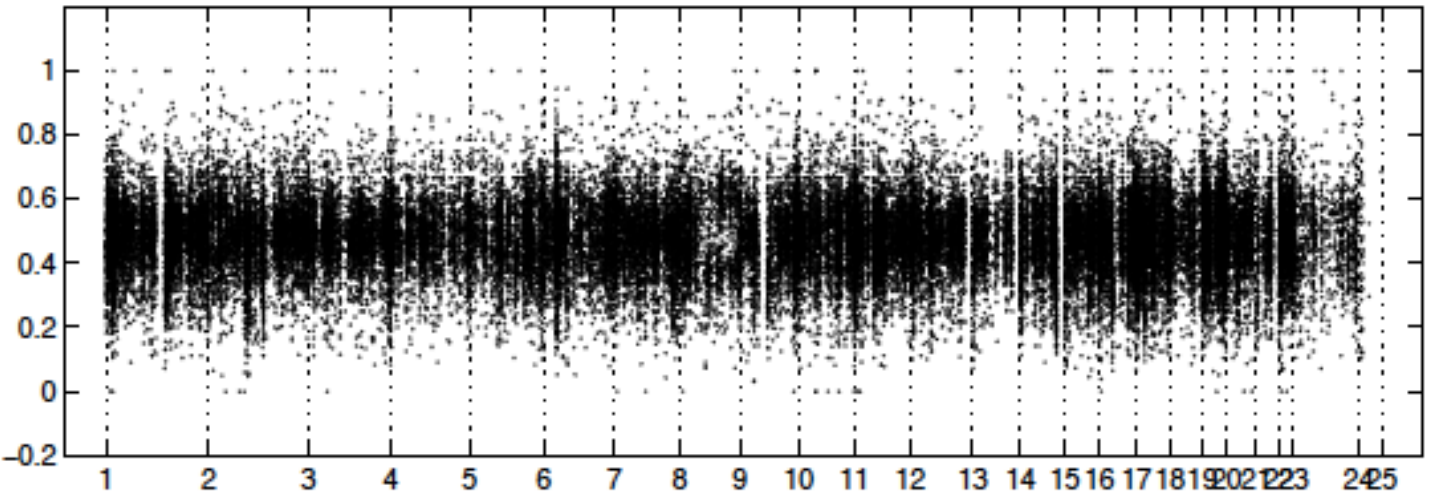

490\_ucsc.edu\_BRCA.IlluminaGA\_DNASeq.Level\_2.6.0.0\_TCGA-AO-A125\_D  
germline-het

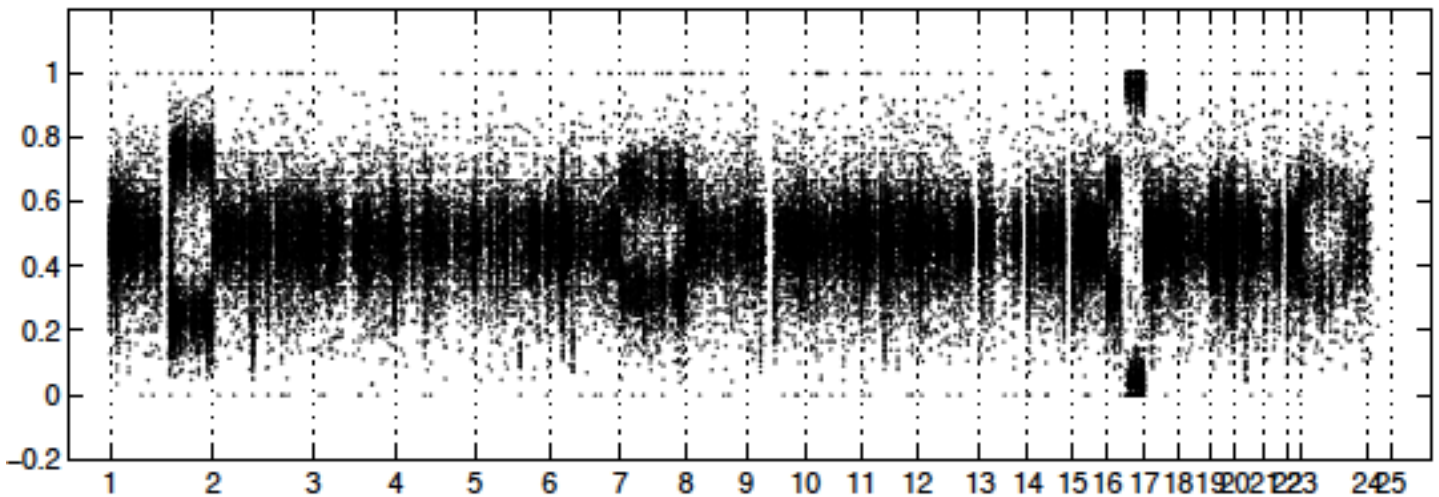

491\_ucsc.edu\_BRCA.IlluminaGA\_DNASeq.Level\_2.13.0.0\_TCGA-E2-A1B4\_D  
germline-het

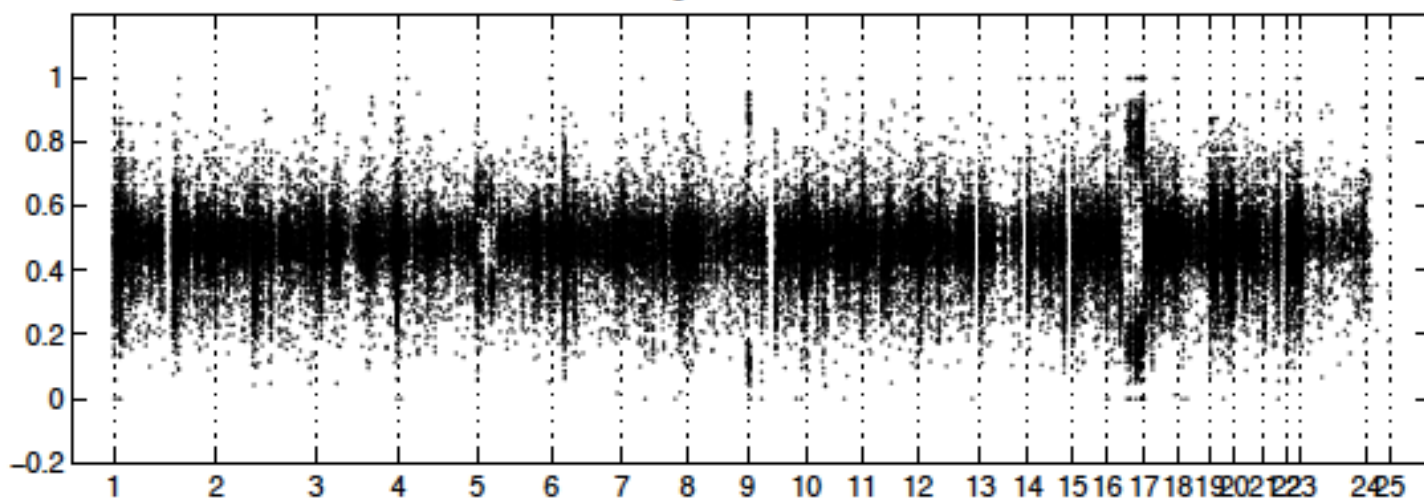

492\_ucsc.edu\_BRCA.IlluminaGA\_DNASeq.Level\_2.10.0.0\_TCGA-BH-A0DX\_D  
germline-het

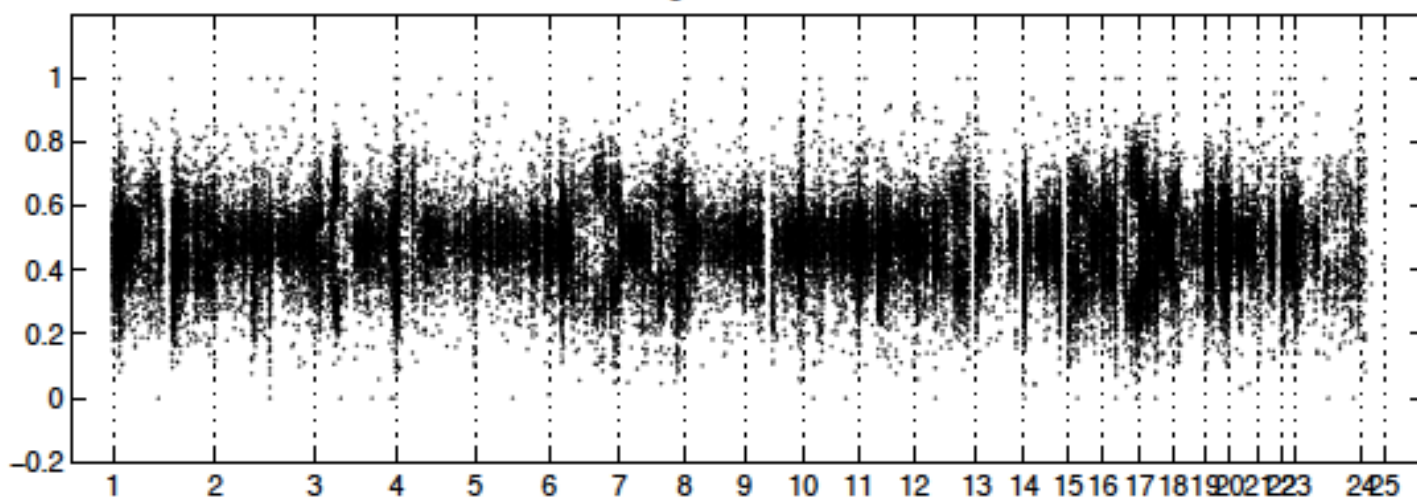

493\_ucsc.edu\_BRCA.IlluminaGA\_DNASeq.Level\_2.2.0.0\_TCGA-A2-A0T6\_D  
germline-het

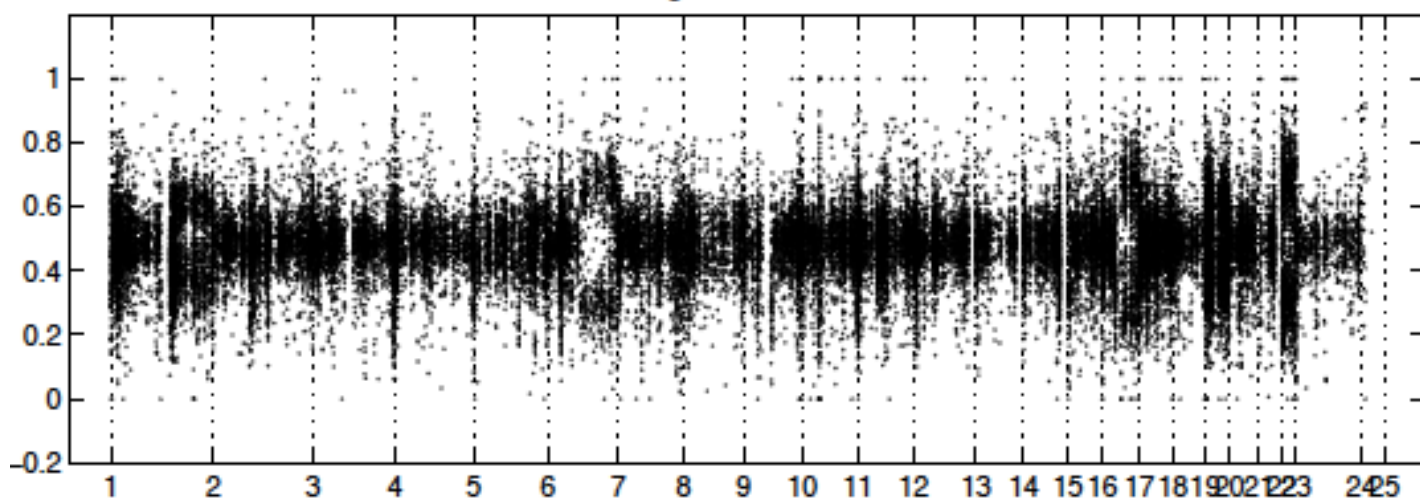

494\_ucsc.edu\_BRCA.IlluminaGA\_DNASeq.Level\_2.13.0.0\_TCGA-E2-A1BC\_D  
germline-het

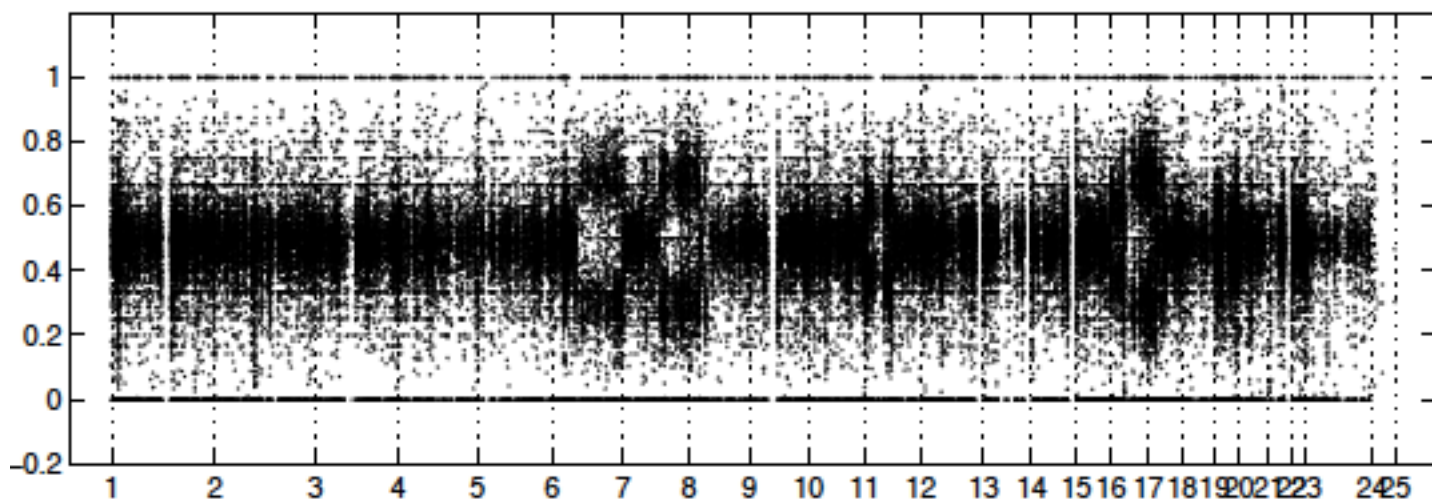

495\_ucsc.edu\_BRCA.IlluminaGA\_DNASeq.Level\_2.14.0.0\_TCGA-B6-A0IP\_W  
germline-het

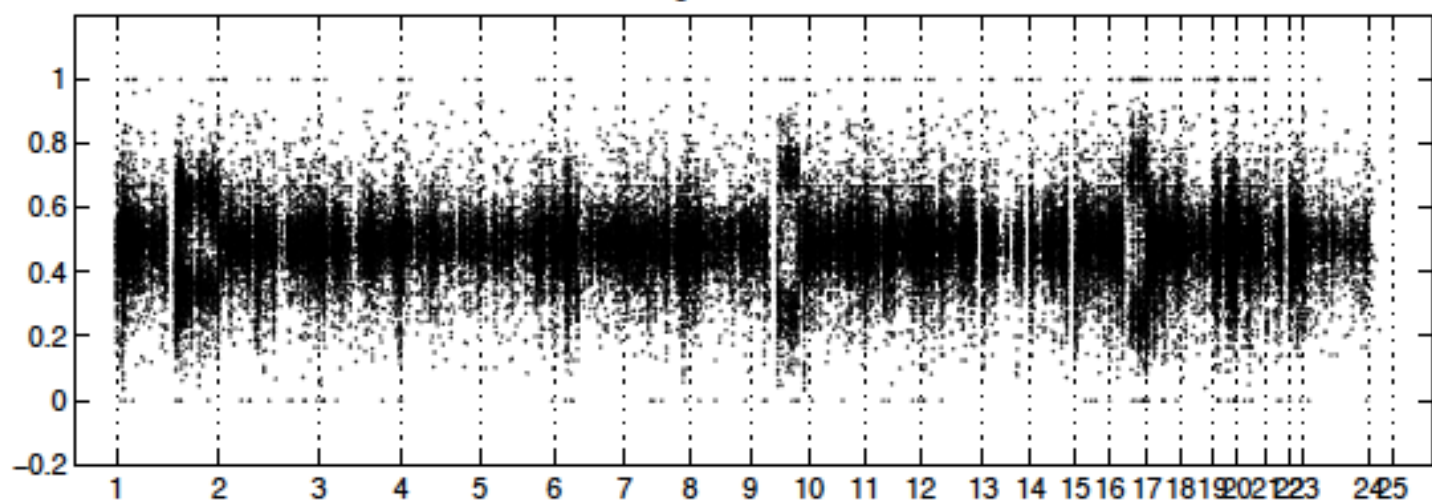

496\_ucsc.edu\_BRCA.IlluminaGA\_DNASeq.Level\_2.11.0.0\_TCGA-C8-A12V\_D  
germline-het

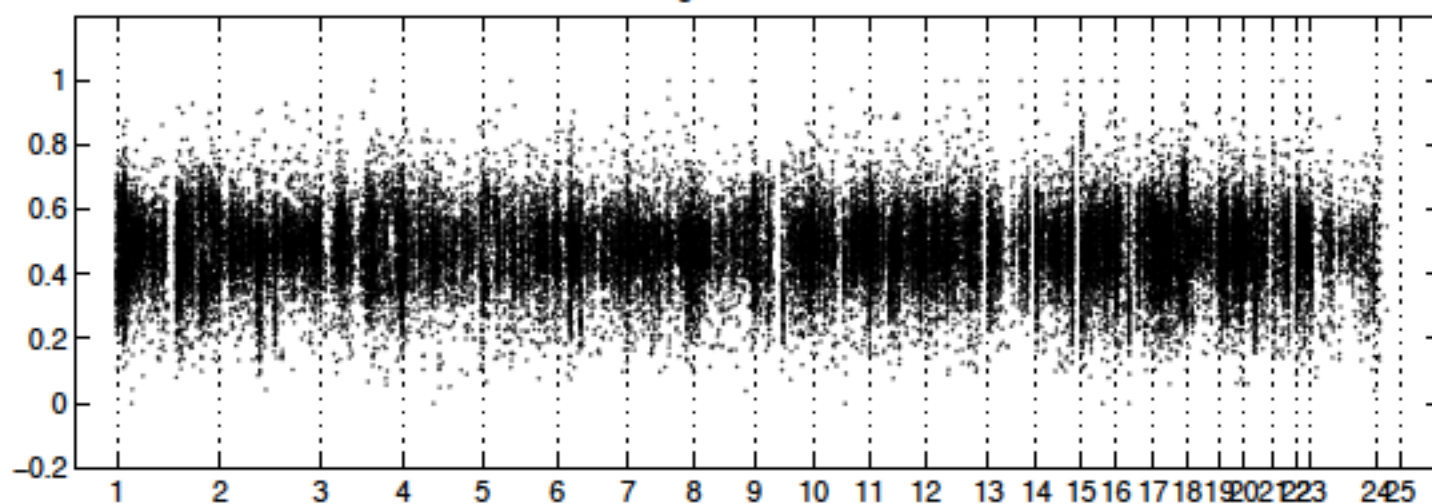

497\_ucsc.edu\_BRCA.IlluminaGA\_DNASeq.Level\_2.10.0.0\_TCGA-BH-A0EA\_D  
germline-het

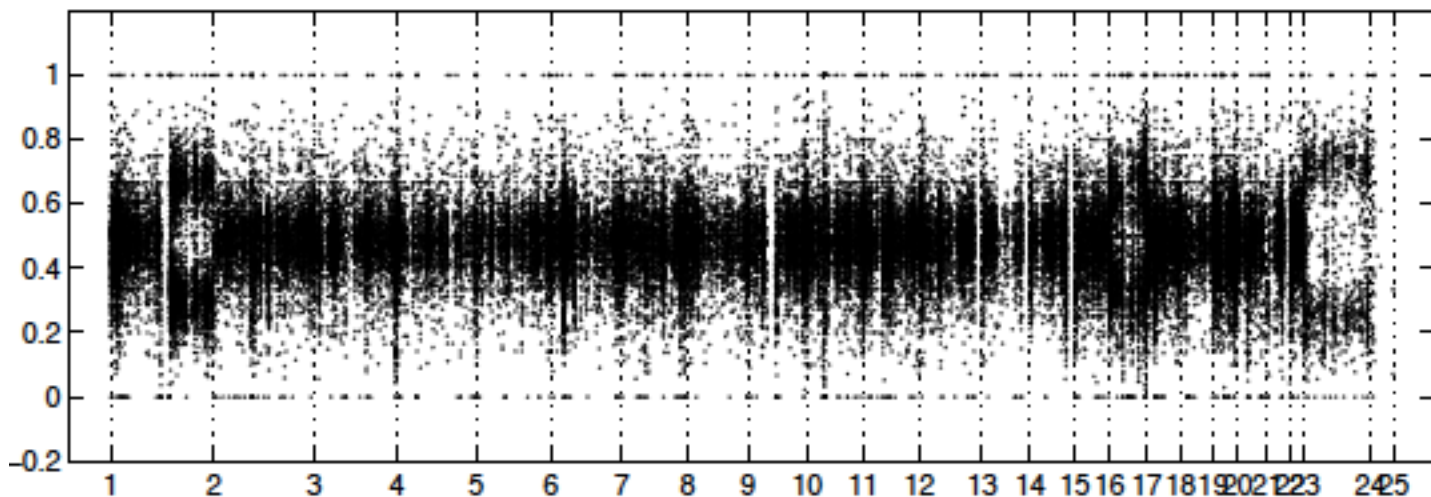

498\_ucsc.edu\_BRCA.IlluminaGA\_DNASeq.Level\_2.10.0.0\_TCGA-BH-A0B0\_D  
germline-het

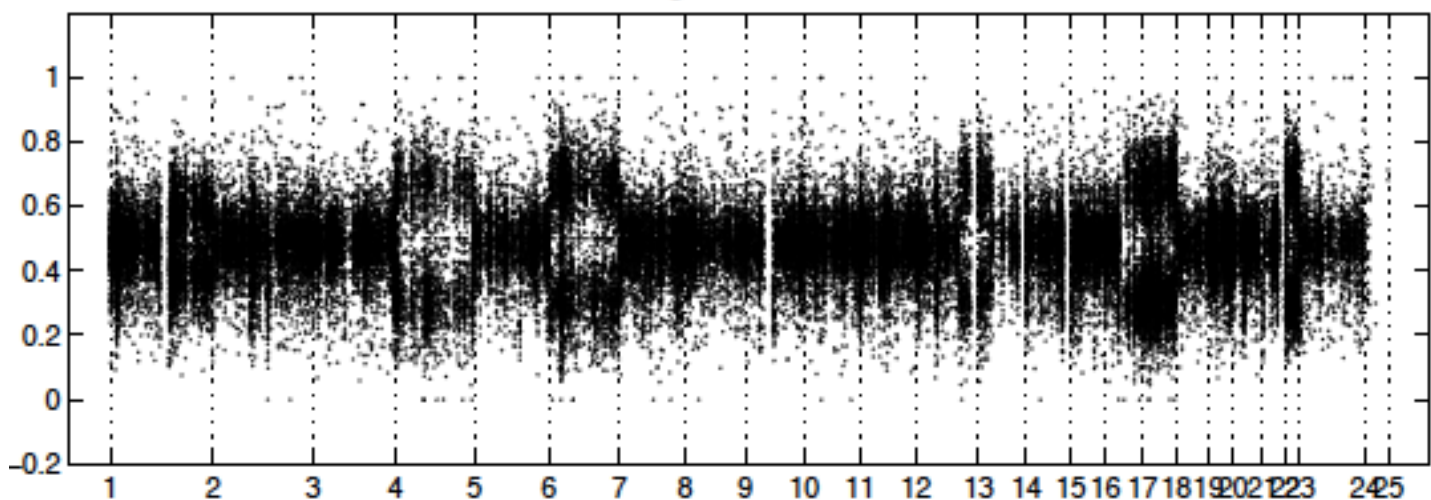

499\_ucsc.edu\_BRCA.IlluminaGA\_DNASeq.Level\_2.10.0.0\_TCGA-BH-A0HO\_W  
germline-het

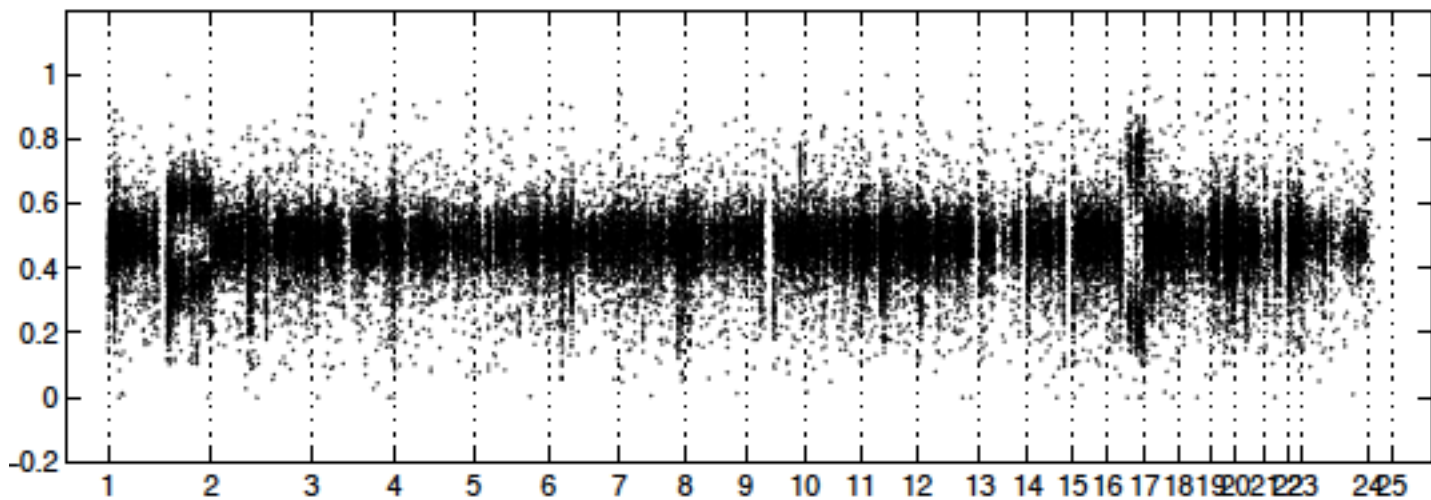



500\_ucsc.edu\_BRCA.IlluminaGA\_DNASeq.Level\_2.10.0.0\_TCGA-BH-A0DV\_D  
germline-het

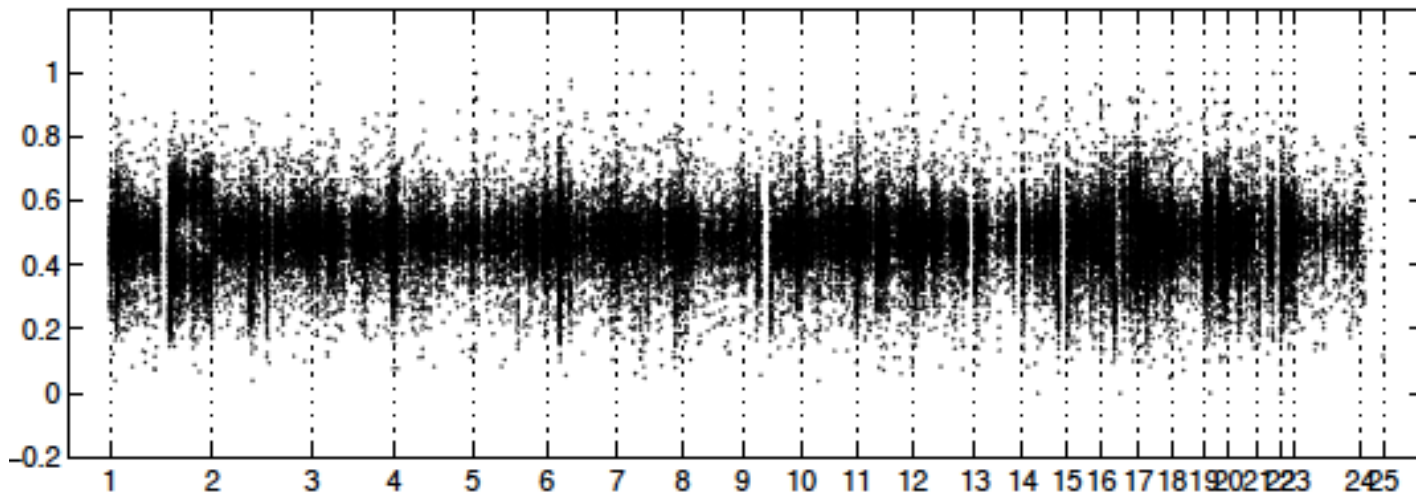

501\_ucsc.edu\_BRCA.IlluminaGA\_DNASeq.Level\_2.10.0.0\_TCGA-BH-A0E9\_D  
germline-het

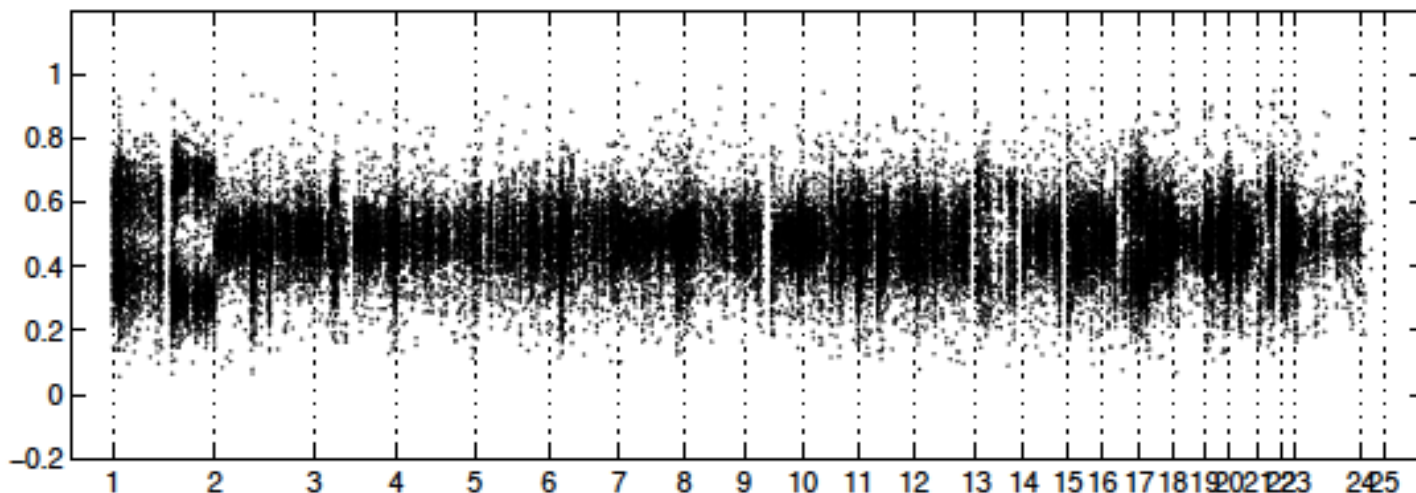

502\_ucsc.edu\_BRCA.IlluminaGA\_DNASeq.Level\_2.10.0.0\_TCGA-BH-A0RX\_D  
germline-het

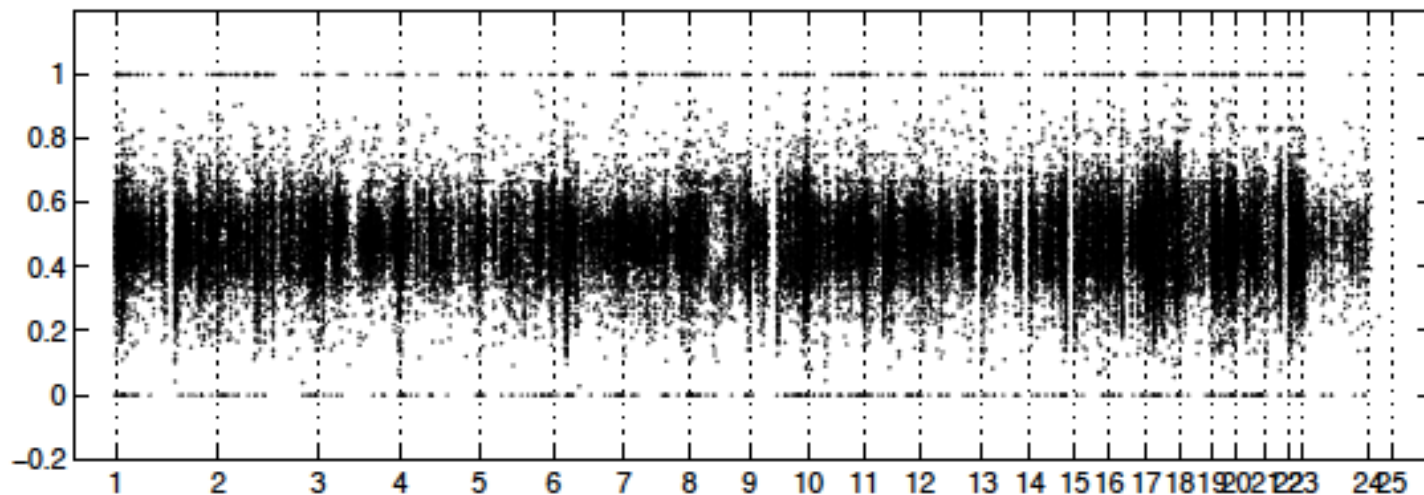

503\_ucsc.edu\_BRCA.IlluminaGA\_DNASeq.Level\_2.10.0.0\_TCGA-BH-A0BS\_D  
germline-het

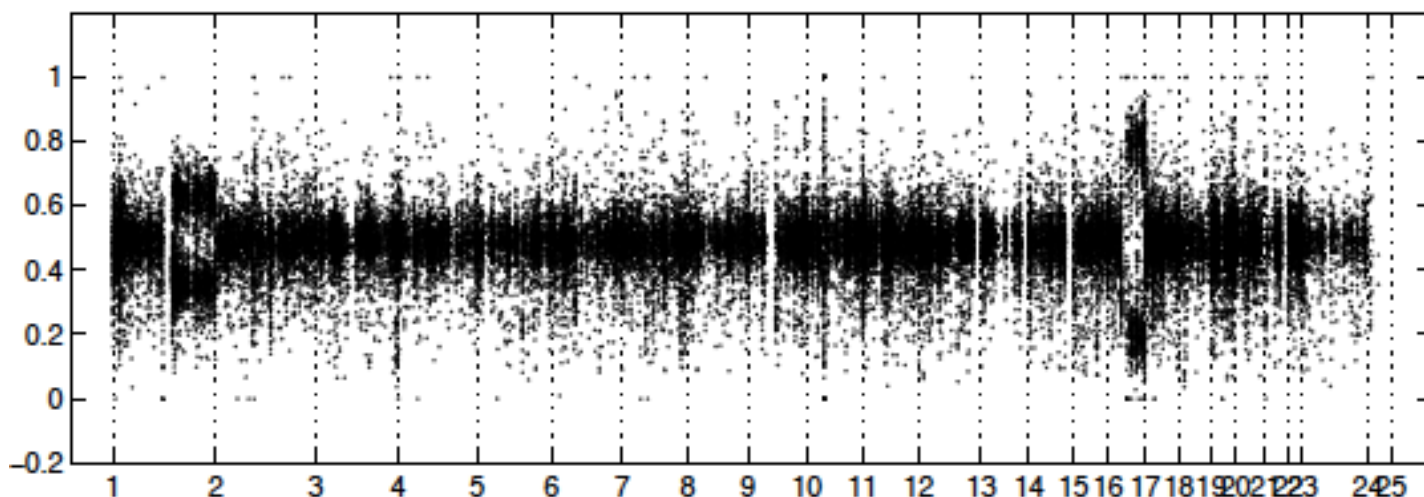

504\_ucsc.edu\_BRCA.IlluminaGA\_DNASeq.Level\_2.2.0.0\_TCGA-A2-A0CL\_D  
germline-het

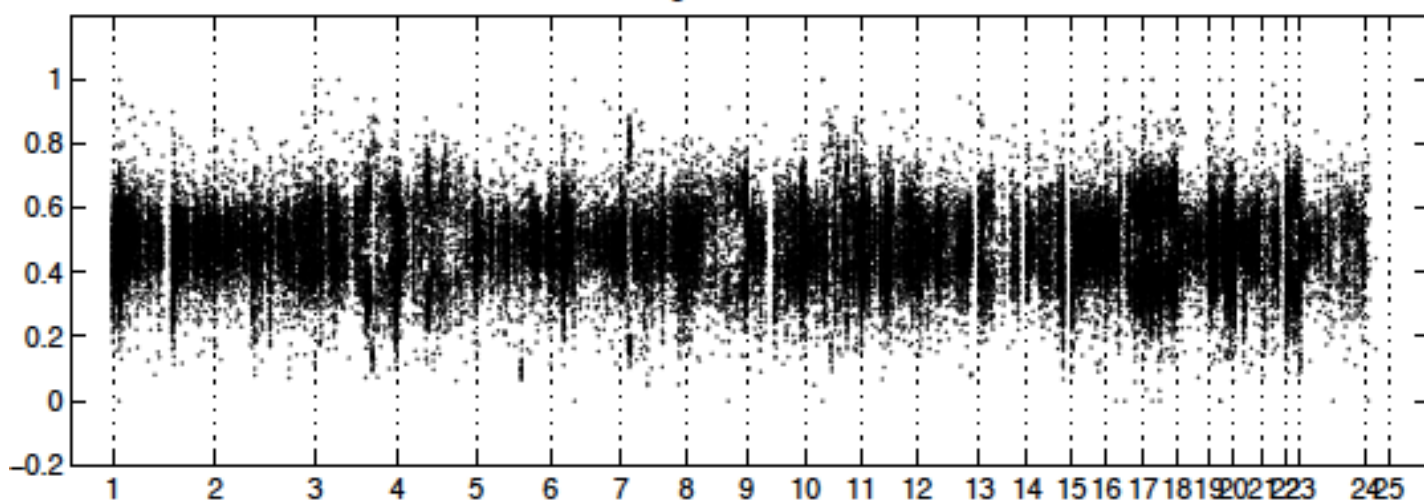

505\_ucsc.edu\_BRCA.IlluminaGA\_DNASeq.Level\_2.10.0.0\_TCGA-BH-A0W5\_D  
germline-het

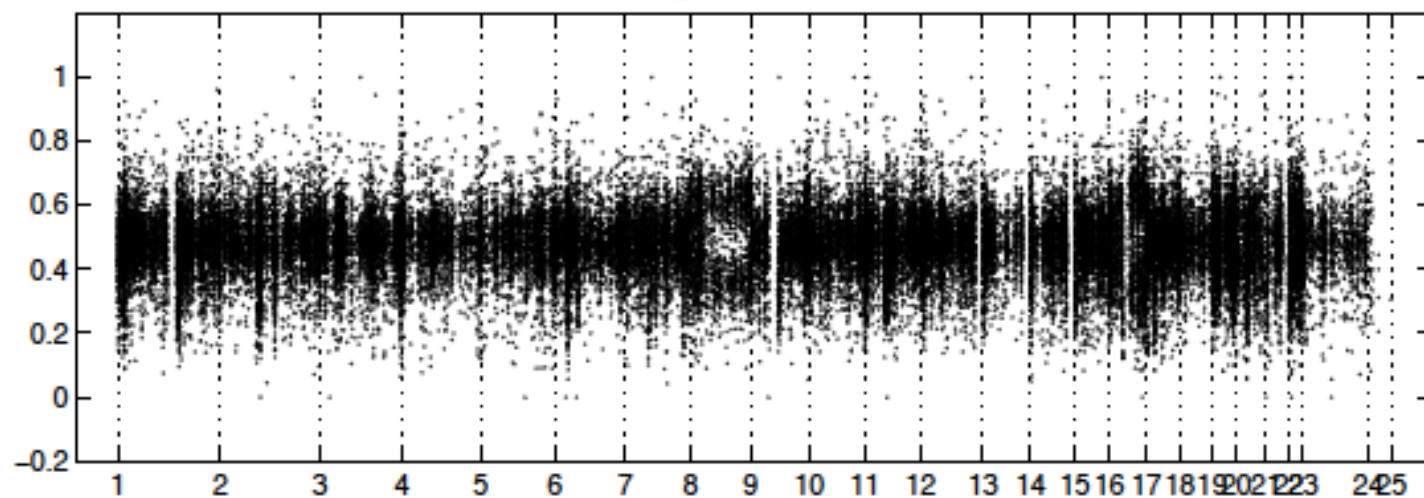

506\_ucsc.edu\_BRCA.IlluminaGA\_DNASeq.Level\_2.2.0.0\_TCGA-A2-A0EN\_D  
germline-het

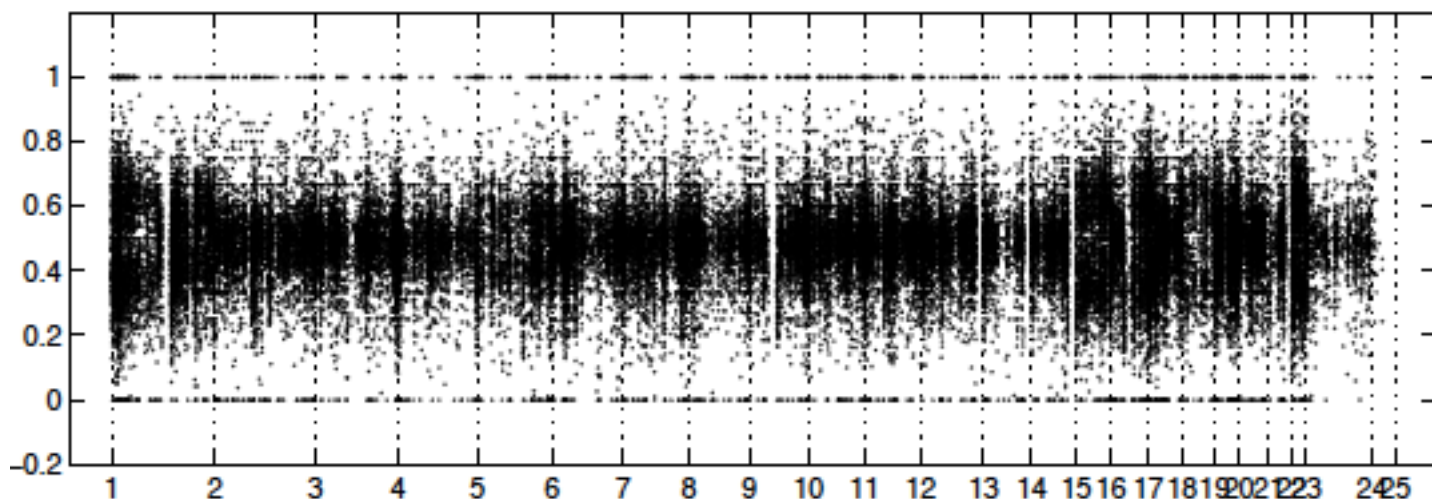

507\_ucsc.edu\_BRCA.IlluminaGA\_DNASeq.Level\_2.9.0.0\_TCGA-B6-A0RM\_D  
germline-het

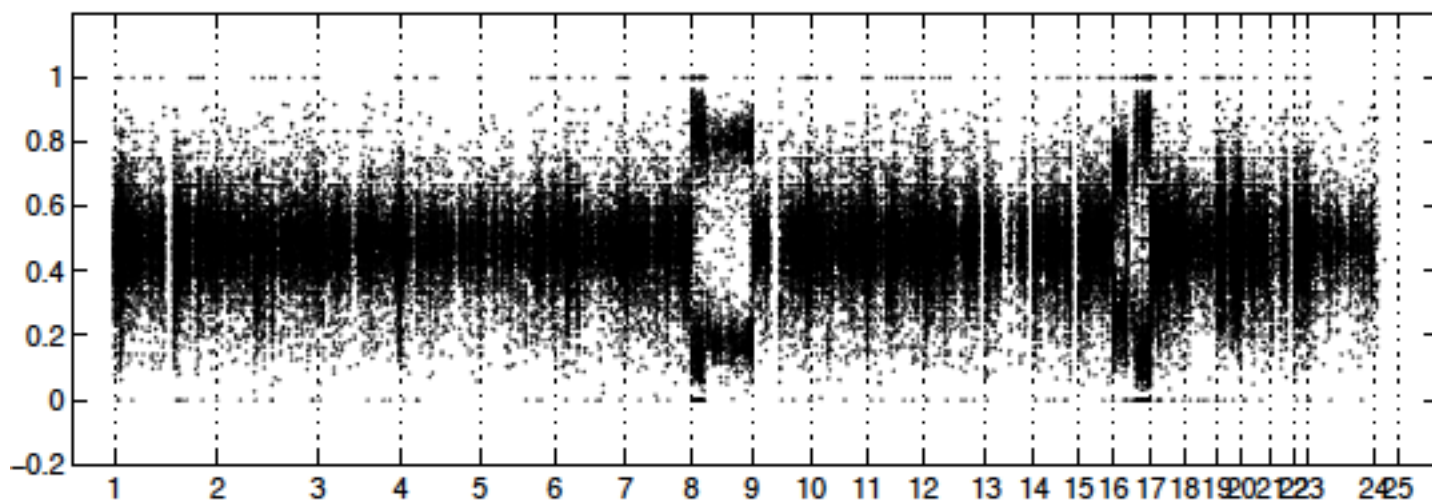

508\_ucsc.edu\_BRCA.IlluminaGA\_DNASeq.Level\_2.13.0.0\_TCGA-E2-A1B5\_D  
germline-het

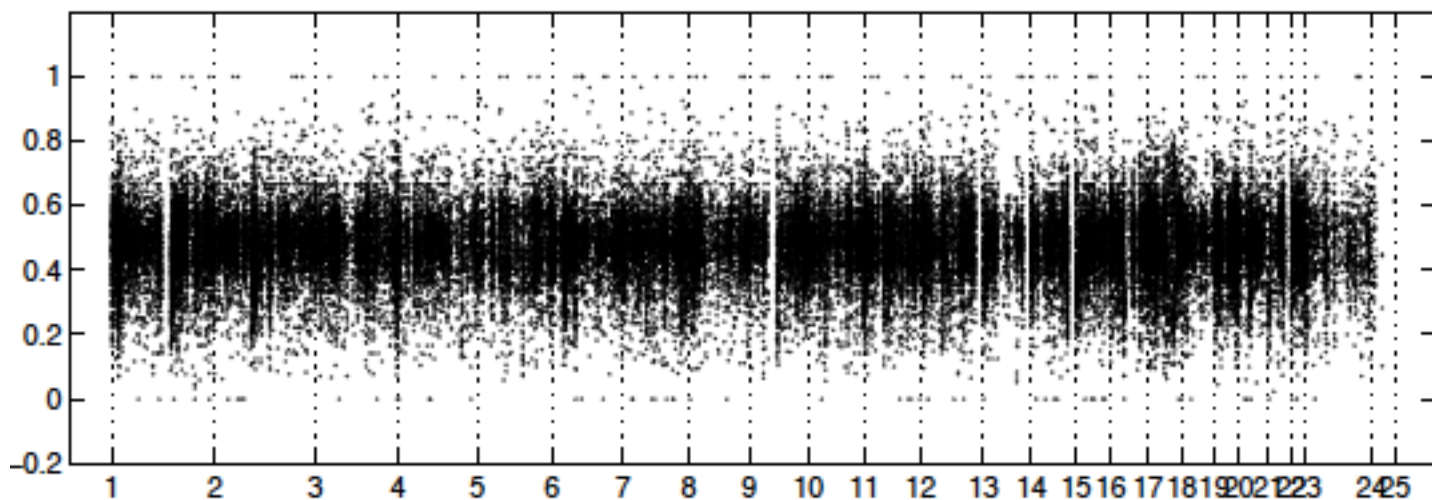

509\_ucsc.edu\_BRCA.IlluminaGA\_DNASeq.Level\_2.10.0.0\_TCGA-BH-A0HI\_D  
germline-het

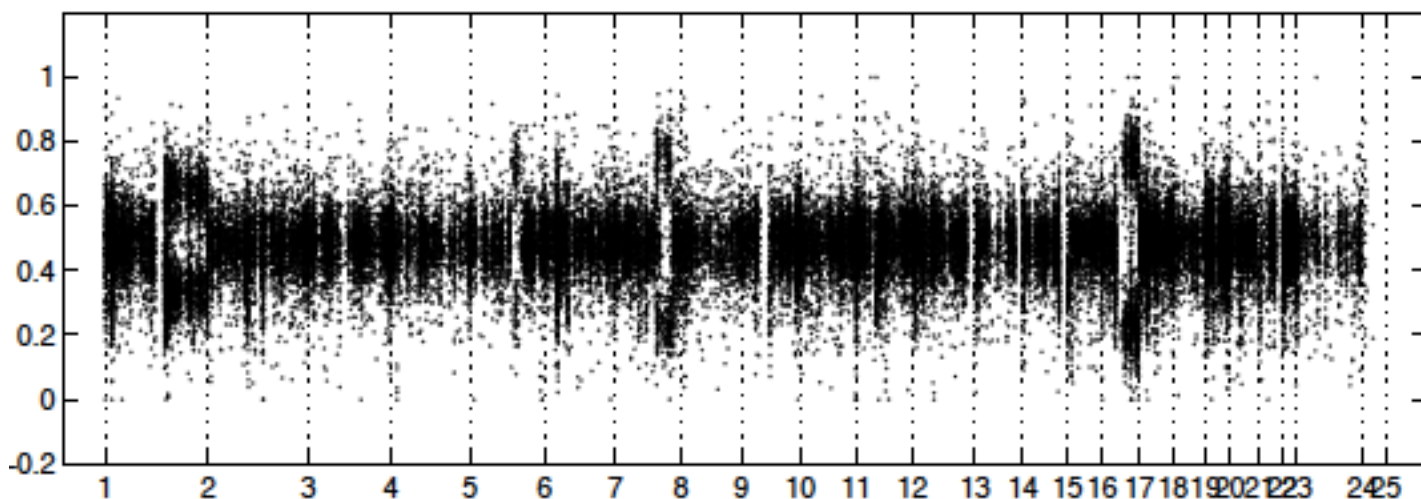

510\_ucsc.edu\_BRCA.IlluminaGA\_DNASeq.Level\_2.13.0.0\_TCGA-E2-A156\_D  
germline-het

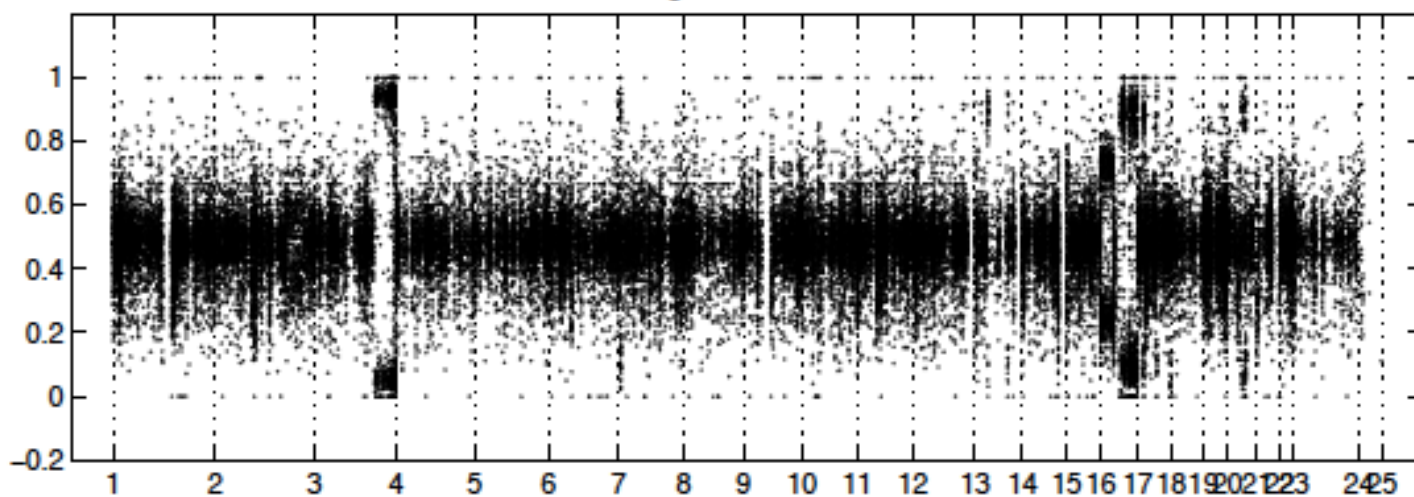

511\_ucsc.edu\_BRCA.IlluminaGA\_DNASeq.Level\_2.2.0.0\_TCGA-A2-A0EW\_D  
germline-het

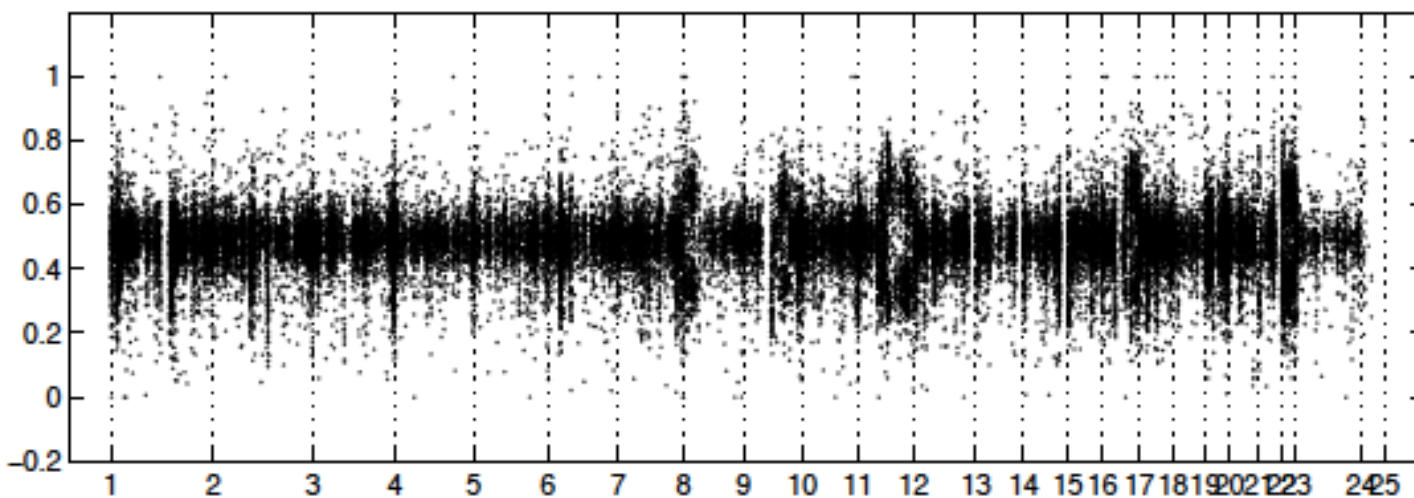

512\_ucsc.edu\_BRCA.IlluminaGA\_DNASeq.Level\_2.11.0.0\_TCGA-C8-A133\_D  
germline-het

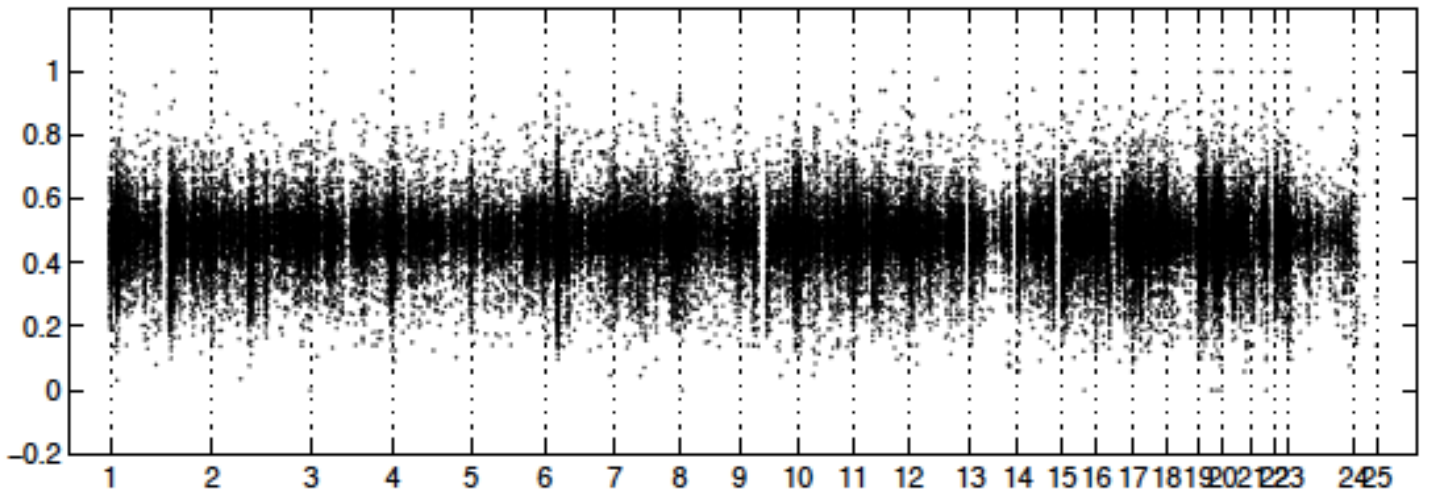

513\_ucsc.edu\_BRCA.IlluminaGA\_DNASeq.Level\_2.13.0.0\_TCGA-E2-A1B6\_D  
germline-het

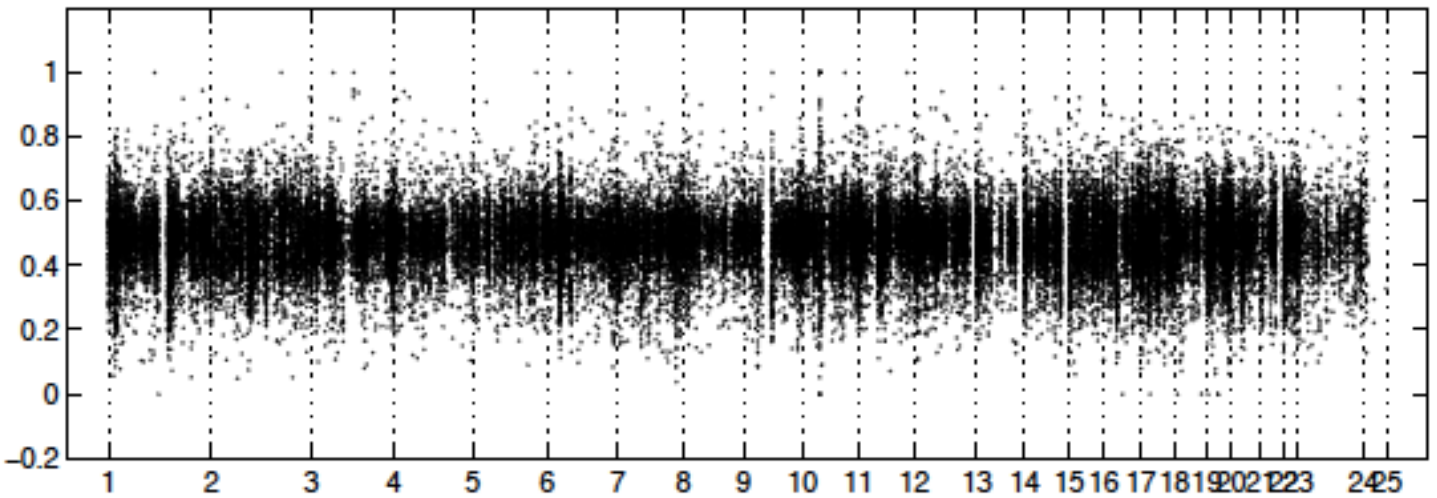

514\_ucsc.edu\_BRCA.IlluminaGA\_DNASeq.Level\_2.2.0.0\_TCGA-A2-A0YK\_D  
germline-het

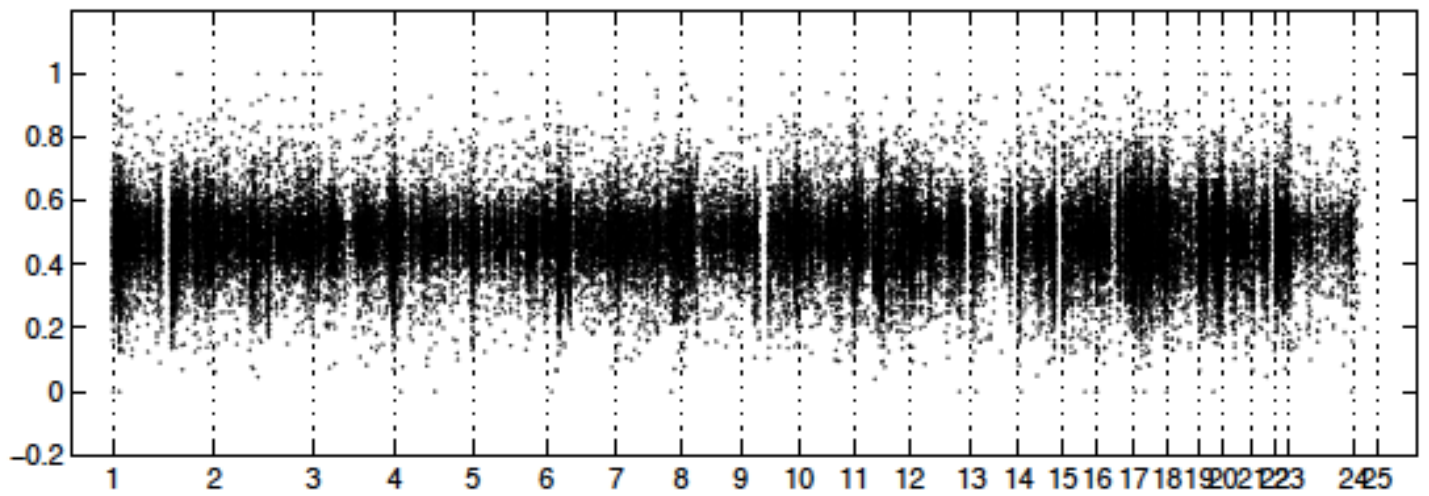

515\_ucsc.edu\_BRCA.IlluminaGA\_DNASeq.Level\_2.2.0.0\_TCGA-A2-A0YL\_D  
germline-het

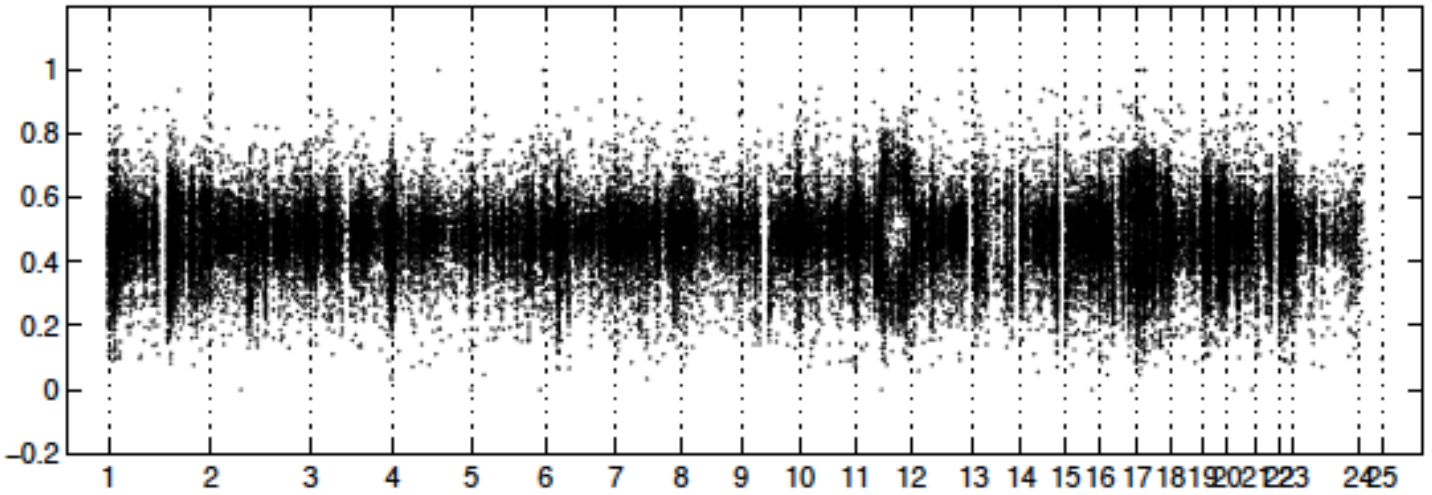

516\_ucsc.edu\_BRCA.IlluminaGA\_DNASeq.Level\_2.8.0.0\_TCGA-AR-A1AX\_D  
germline-het

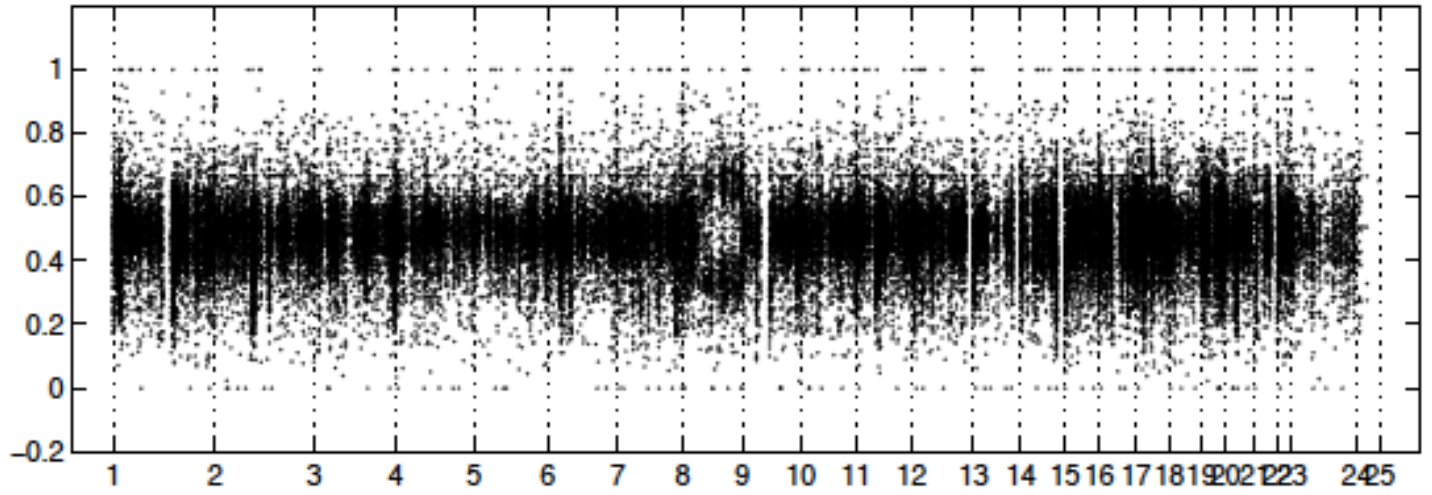

517\_ucsc.edu\_BRCA.IlluminaGA\_DNASeq.Level\_2.12.0.0\_TCGA-D8-A145\_D  
germline-het

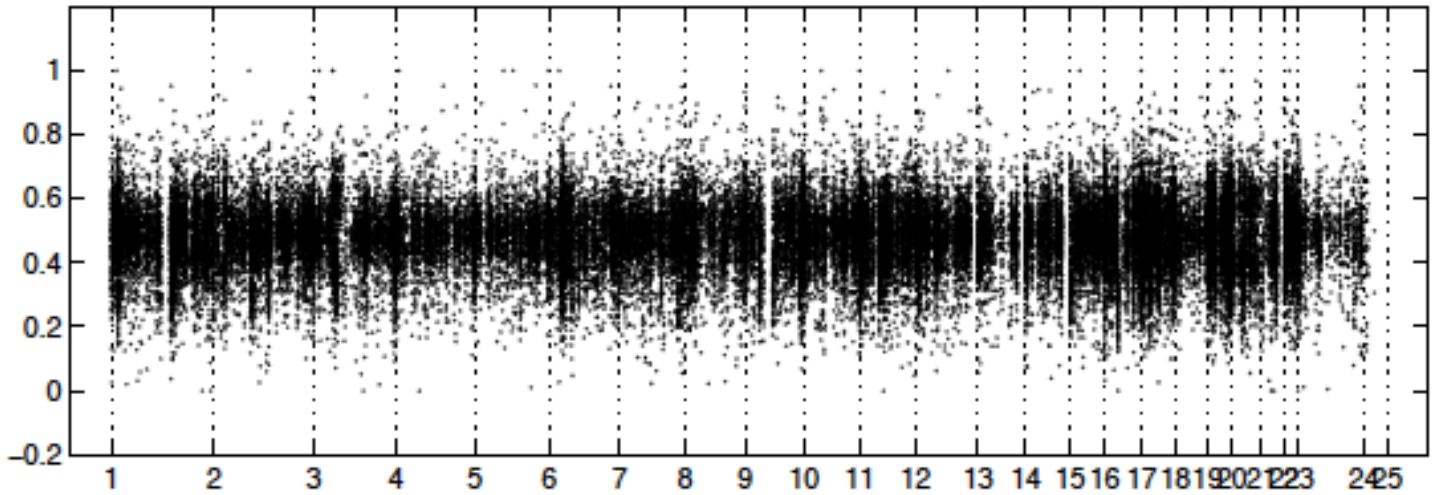

518\_ucsc.edu\_BRCA.IlluminaGA\_DNASeq.Level\_2.13.0.0\_TCGA-E2-A15L\_D  
germline-het

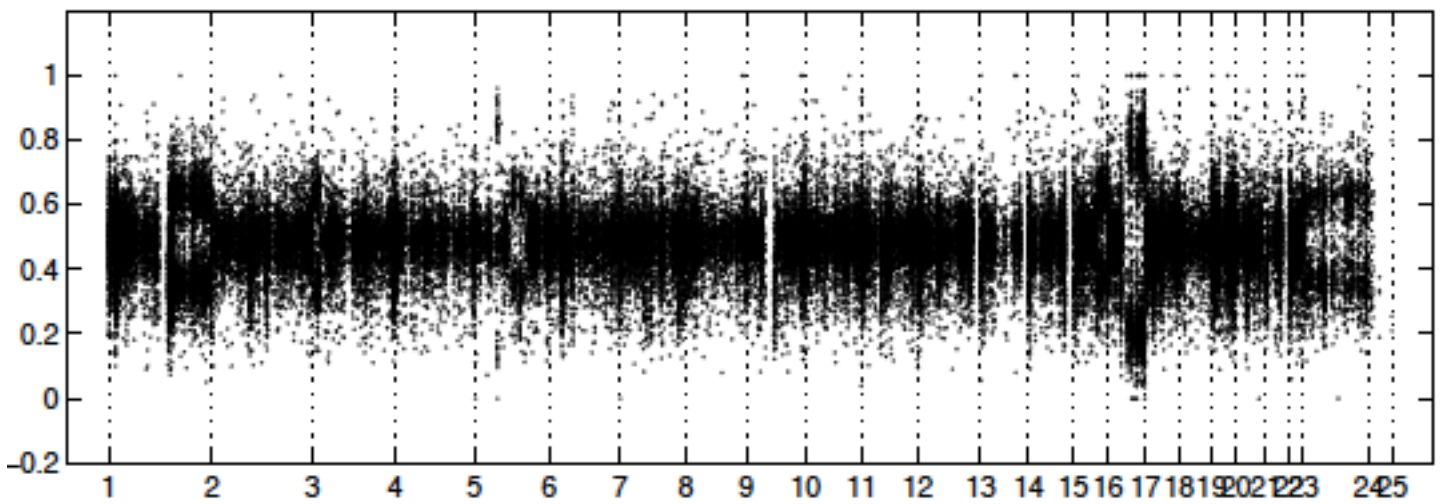

519\_ucsc.edu\_BRCA.IlluminaGA\_DNASeq.Level\_2.9.0.0\_TCGA-B6-A0RQ\_D  
germline-het

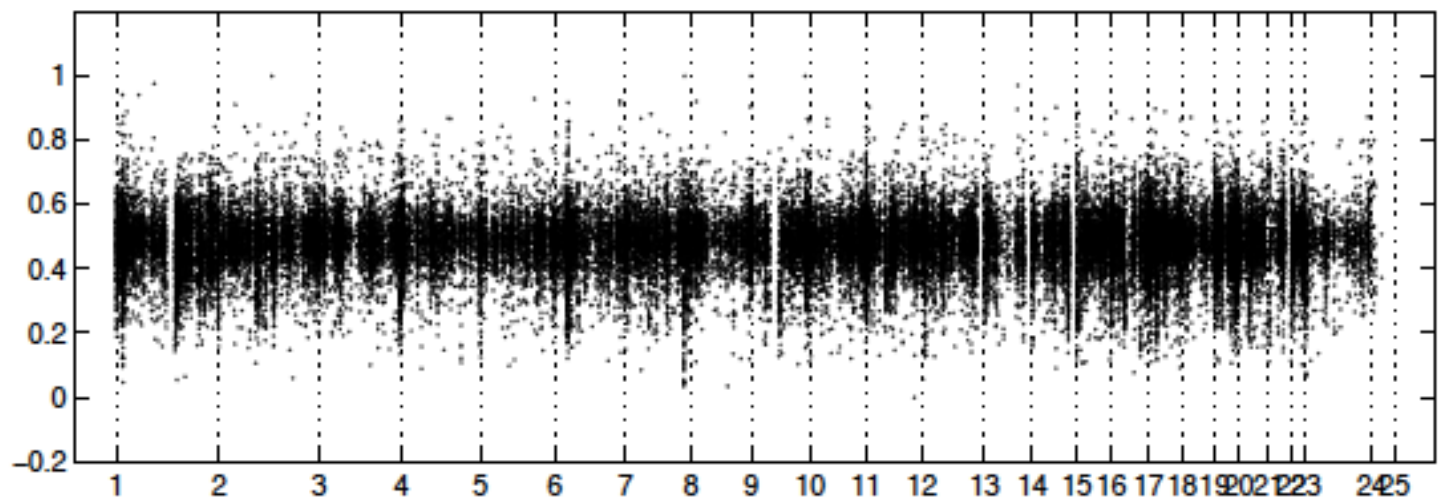

520\_ucsc.edu\_BRCA.IlluminaGA\_DNASeq.Level\_2.10.0.0\_TCGA-BH-A0BQ\_D  
germline-het

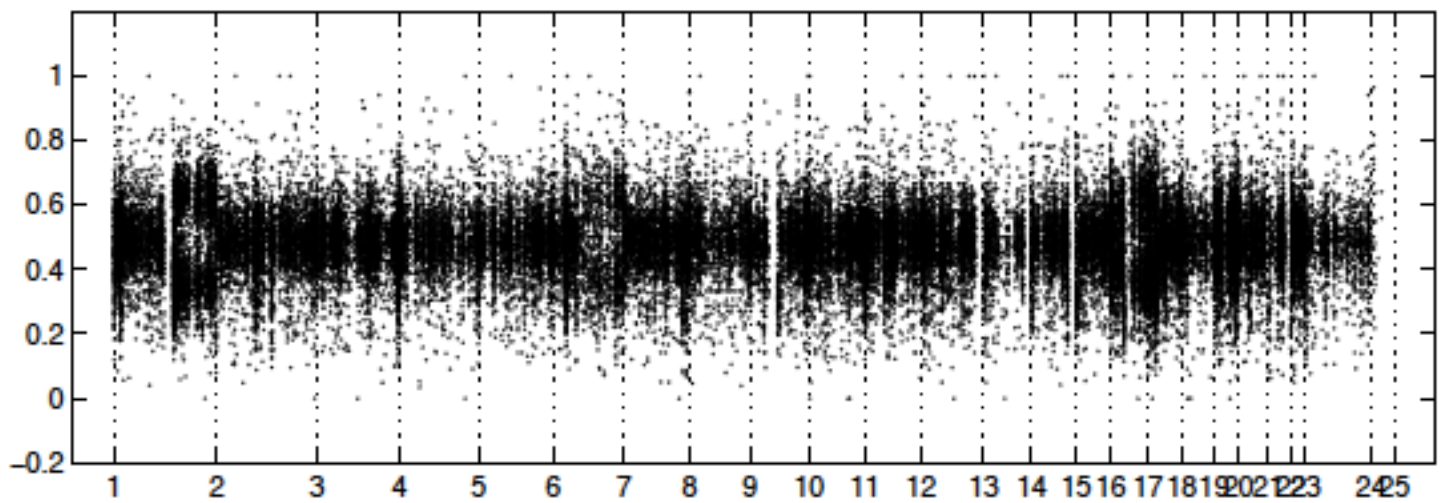

521\_ucsc.edu\_BRCA.IlluminaGA\_DNASeq.Level\_2.10.0.0\_TCGA-BH-A0H5\_D  
germline-het

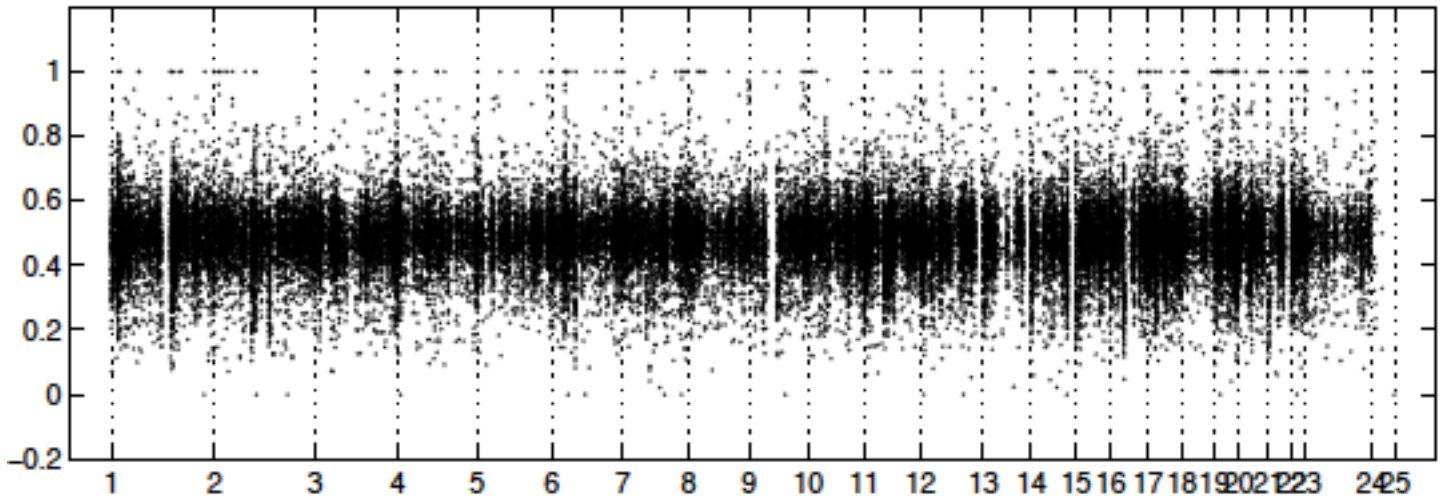

522\_ucsc.edu\_BRCA.IlluminaGA\_DNASeq.Level\_2.6.0.0\_TCGA-AO-A12H\_D  
germline-het

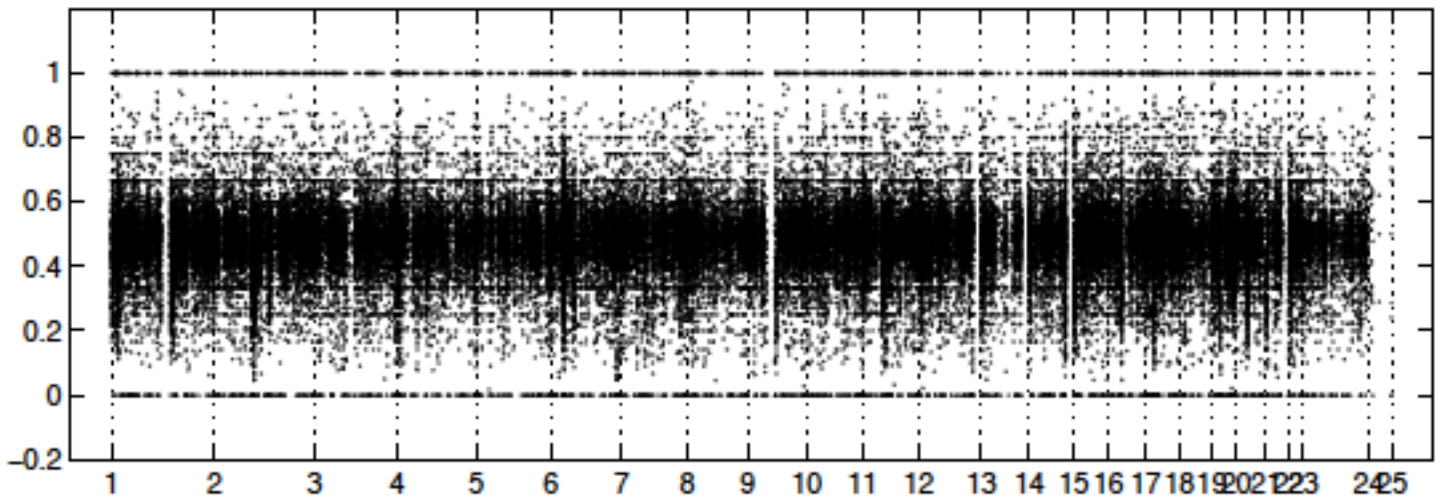

Supplement: NIHMS973253-supplement-7.pdf [file NIHMS973253-supplement-7.pdf]
